# Supplementary material for: Systematic analysis of paralogous regions in 41,755 exomes uncovers clinically relevant variation
Source: Research Square preprint supplement (doi:10.21203/rs.3.rs-2302399/v1), 2022-11-29
Supplement: Supplementary file 1 [file STable1.xlsx]

## Sheet: STable1
Recurrence	Variation
1	chr10_102040777_102040778_AT/-
6	chr10_102107836_102107835_-/AAC
4	chr10_102107846_102107845_-/CCC
1	chr10_102107906_102107906_T/A
1	chr10_102120618_102120618_G/A
56	chr10_103370815_103370814_-/CTC
2	chr10_103371090_103371090_G/T
1	chr10_103371145_103371145_G/T
1	chr10_103371434_103371434_T/G
1	chr10_103432703_103432702_-/ATGGT
26	chr10_103432705_103432704_-/GATAC
1	chr10_103454269_103454269_C/T
2	chr10_103454383_103454382_-/T
1	chr10_103454402_103454402_A/T
110	chr10_103454656_103454656_G/-
96	chr10_103454726_103454725_-/CG
56	chr10_103454815_103454815_G/C
54	chr10_103454877_103454877_C/-
3	chr10_120896174_120896174_G/A
86	chr10_120896194_120896194_A/C
1	chr10_120896230_120896230_T/C
1	chr10_120896248_120896249_AG/-
1	chr10_120896278_120896278_A/C
3	chr10_120896285_120896285_A/G
1	chr10_120896294_120896294_A/T
3	chr10_120896300_120896300_C/T
1	chr10_120896304_120896304_A/G
1	chr10_124340178_124340178_A/T
1	chr10_124340253_124340253_T/C
21	chr10_124340654_124340654_C/A
1	chr10_124340658_124340658_G/A
12	chr10_124340664_124340664_C/A
1	chr10_124340688_124340688_C/G
3	chr10_124340698_124340698_T/C
1	chr10_124340700_124340700_A/C
1	chr10_124340706_124340706_G/C
94	chr10_124340721_124340721_C/A
4	chr10_124340721_124340721_C/T
1	chr10_124340722_124340722_G/A
2	chr10_124340731_124340731_T/C
1	chr10_124340749_124340749_A/T
1	chr10_124340751_124340751_G/A
1	chr10_124340761_124340761_T/C
20	chr10_124340768_124340768_C/T
1	chr10_124340780_124340780_C/T
53	chr10_124340781_124340781_G/A
12	chr10_124340788_124340788_C/A
101	chr10_124340799_124340799_C/T
278	chr10_124340814_124340814_G/A
1	chr10_124340814_124340814_G/C
1	chr10_124340828_124340828_G/A
6	chr10_124340840_124340840_C/G
31	chr10_124340841_124340841_C/T
407	chr10_124340851_124340851_A/G
27	chr10_124340876_124340876_C/T
2	chr10_124340909_124340909_G/A
123	chr10_124340912_124340912_T/A
1	chr10_124340928_124340928_C/G
1	chr10_124340943_124340943_T/C
1	chr10_124340944_124340943_-/C
69	chr10_124341181_124341181_G/C
9	chr10_124341200_124341200_C/G
1	chr10_124341212_124341212_T/G
2	chr10_124341221_124341221_C/T
26	chr10_124341222_124341222_G/A
1	chr10_124341229_124341229_C/G
39	chr10_124341241_124341241_G/-
7	chr10_124341245_124341245_C/G
1	chr10_124341246_124341246_T/C
1	chr10_124341291_124341291_T/-
2	chr10_124341291_124341291_T/C
1	chr10_124341299_124341299_C/T
5	chr10_124341302_124341302_T/G
3	chr10_124341305_124341305_A/G
1	chr10_124341311_124341311_A/G
1	chr10_124341314_124341314_T/C
2	chr10_124341319_124341319_G/A
1	chr10_124341322_124341322_C/G
1	chr10_124341325_124341325_A/C
2	chr10_124341327_124341327_A/G
1	chr10_124341348_124341347_-/A
46	chr10_124341353_124341353_T/A
2	chr10_124341359_124341359_C/A
2	chr10_124341360_124341360_C/T
4	chr10_124341368_124341368_G/A
1	chr10_124341370_124341370_A/G
3	chr10_124341377_124341377_A/C
21	chr10_124341377_124341377_A/G
1	chr10_124341386_124341386_C/T
1	chr10_124341389_124341389_A/G
1	chr10_124341397_124341397_T/G
57	chr10_124341416_124341416_G/A
1	chr10_124341443_124341443_T/A
1	chr10_124342113_124342113_T/C
1	chr10_124342116_124342116_G/T
210	chr10_124342118_124342118_C/T
31	chr10_124342121_124342121_G/A
1	chr10_124342132_124342132_G/A
4	chr10_124342173_124342173_G/A
1	chr10_124342190_124342190_C/T
5	chr10_124342191_124342191_G/A
2	chr10_124342194_124342194_G/A
2	chr10_124342195_124342195_C/G
4	chr10_124342202_124342202_G/A
1	chr10_124342207_124342207_C/T
6	chr10_124342208_124342208_G/A
1	chr10_124342209_124342209_T/C
1	chr10_124342212_124342212_G/A
8	chr10_124342219_124342219_T/C
4	chr10_124342220_124342220_A/T
5	chr10_124342221_124342221_G/A
2	chr10_124342226_124342226_G/A
1	chr10_124342237_124342237_C/G
18	chr10_124342237_124342237_C/T
18	chr10_124342238_124342238_G/A
11	chr10_124342238_124342238_G/T
6	chr10_124342253_124342253_C/A
5	chr10_124342253_124342253_C/T
3	chr10_124342254_124342254_G/A
82	chr10_124342278_124342278_C/T
24	chr10_124342279_124342279_G/A
3	chr10_124342298_124342298_C/T
16	chr10_124342299_124342299_G/A
1	chr10_124342311_124342311_G/T
359	chr10_124342312_124342312_T/C
8	chr10_124342315_124342315_A/G
1	chr10_124342320_124342320_C/T
2	chr10_124342336_124342336_C/T
194	chr10_124342337_124342337_G/A
57	chr10_124342340_124342340_C/T
2	chr10_124342341_124342341_G/A
1	chr10_124342348_124342348_A/T
1	chr10_124342349_124342349_G/T
1	chr10_124342353_124342353_A/G
15	chr10_124342363_124342363_C/T
2	chr10_124342367_124342367_T/C
3	chr10_124342369_124342369_G/A
2	chr10_124342371_124342371_G/A
2	chr10_124342376_124342376_C/T
17	chr10_124342395_124342395_C/T
2	chr10_124342401_124342401_A/C
19	chr10_124342406_124342406_C/G
1	chr10_124342408_124342408_G/C
8	chr10_124342414_124342414_T/C
2	chr10_124342420_124342420_C/T
3	chr10_124342421_124342421_G/A
3	chr10_124342432_124342432_C/T
1	chr10_124342437_124342437_C/G
1	chr10_124342437_124342437_C/T
23	chr10_124342440_124342440_G/C
3	chr10_124342440_124342440_G/T
2	chr10_124342445_124342445_C/A
1	chr10_124342448_124342448_C/T
1	chr10_124342452_124342452_G/T
17	chr10_124342455_124342455_C/G
1	chr10_124342455_124342455_C/T
1	chr10_124342461_124342461_C/G
2	chr10_124342465_124342465_C/T
2	chr10_124342469_124342469_C/T
4	chr10_124342473_124342473_G/A
1	chr10_124342478_124342478_G/T
1	chr10_124342482_124342482_T/A
12	chr10_124342487_124342487_C/T
1	chr10_124342494_124342494_C/T
1	chr10_124342502_124342502_C/T
2	chr10_124342512_124342512_T/C
3	chr10_124342513_124342513_G/T
3	chr10_124342519_124342519_C/T
1	chr10_124342521_124342521_C/T
1	chr10_124342527_124342527_G/T
5	chr10_124342544_124342544_C/T
1	chr10_124342549_124342549_A/G
1	chr10_124342575_124342575_C/T
2	chr10_124343386_124343386_C/T
3	chr10_124343420_124343420_T/C
4	chr10_124343449_124343449_T/C
4	chr10_124343698_124343698_G/A
5	chr10_124343701_124343701_A/G
2	chr10_124343713_124343713_G/A
3	chr10_124343714_124343714_C/T
21	chr10_124343735_124343735_C/A
2	chr10_124343749_124343749_A/G
1	chr10_124343759_124343759_T/C
2	chr10_124343775_124343775_C/G
2	chr10_124343775_124343778_CCTT/-
3410	chr10_124343784_124343784_C/T
7	chr10_124343785_124343785_G/A
242	chr10_124343794_124343794_A/C
1	chr10_124343799_124343799_C/T
1	chr10_124343820_124343820_A/T
2	chr10_124343833_124343833_C/T
1	chr10_124343837_124343837_G/A
1	chr10_124343839_124343839_T/A
2	chr10_124343844_124343844_A/G
82	chr10_124343853_124343853_C/T
3	chr10_124343854_124343854_G/A
7	chr10_124343856_124343856_C/T
2	chr10_124343857_124343857_G/A
3	chr10_124343857_124343857_G/T
1	chr10_124343858_124343858_C/T
3058	chr10_124343863_124343863_T/G
8	chr10_124343867_124343867_G/A
1	chr10_124343867_124343867_G/C
1	chr10_124343867_124343867_G/T
9	chr10_124343868_124343868_G/A
2	chr10_124343868_124343868_G/T
169	chr10_124343874_124343874_C/T
6	chr10_124343879_124343879_G/T
2	chr10_124343894_124343894_A/C
5	chr10_124343894_124343894_A/T
1	chr10_124343903_124343903_C/T
2	chr10_124343905_124343905_C/T
4	chr10_124343930_124343930_C/T
1	chr10_124343937_124343937_C/G
6	chr10_124343941_124343941_G/A
5	chr10_124343947_124343947_G/A
13	chr10_124343959_124343959_G/A
4	chr10_124343973_124343973_G/A
1	chr10_124343973_124343973_G/C
3	chr10_124343973_124343973_G/T
4	chr10_124343987_124343987_C/T
1	chr10_124343997_124343997_A/G
1	chr10_124344015_124344015_G/A
2	chr10_124344016_124344016_C/T
2	chr10_124344017_124344017_G/A
2	chr10_124362383_124362383_A/T
1	chr10_124362385_124362385_C/T
1	chr10_124362389_124362389_C/G
1	chr10_124362389_124362389_C/T
4	chr10_124362390_124362390_G/A
2	chr10_124362397_124362397_C/T
1	chr10_124362407_124362407_T/A
13	chr10_124362443_124362443_A/G
1	chr10_124362446_124362446_C/G
1	chr10_124362450_124362450_T/G
2	chr10_124362453_124362453_A/G
93	chr10_124362454_124362454_C/T
1	chr10_124362455_124362455_G/A
10	chr10_124362460_124362460_A/G
1	chr10_124362478_124362478_A/G
24	chr10_124362481_124362481_G/A
1	chr10_124362492_124362492_C/-
1	chr10_124362493_124362493_C/T
2	chr10_124362507_124362507_A/G
1	chr10_124362508_124362508_C/G
1	chr10_124362522_124362522_G/C
4	chr10_124362529_124362529_A/T
18	chr10_124362533_124362533_G/A
2	chr10_124362535_124362535_C/T
2	chr10_124362536_124362536_C/G
5	chr10_124362540_124362540_T/C
3	chr10_124362541_124362541_C/A
2	chr10_124362546_124362546_C/T
1	chr10_124362553_124362553_A/G
6	chr10_124362556_124362556_C/G
1	chr10_124362558_124362558_A/G
2	chr10_124362562_124362562_T/G
1	chr10_124362570_124362570_T/C
1	chr10_124362580_124362580_C/T
1	chr10_124362581_124362581_A/G
1	chr10_124362586_124362586_T/C
1	chr10_124362594_124362594_C/T
2	chr10_124362616_124362616_C/T
4	chr10_124362619_124362619_C/T
237	chr10_124362631_124362631_C/T
8	chr10_124362632_124362632_G/A
13	chr10_124362636_124362636_C/T
3	chr10_124362640_124362640_G/A
1	chr10_124362641_124362641_C/A
12	chr10_124362641_124362641_C/T
2	chr10_124362642_124362642_C/G
1	chr10_124362650_124362650_G/T
2	chr10_124362651_124362651_T/A
1	chr10_124362653_124362653_C/A
1	chr10_124362656_124362656_A/G
1	chr10_124362661_124362661_C/T
2	chr10_124362691_124362691_C/A
1	chr10_124362692_124362695_CAAT/-
1	chr10_124362696_124362696_C/T
1	chr10_124362697_124362697_A/T
1	chr10_124362699_124362699_C/T
1	chr10_124362700_124362700_C/A
1	chr10_124362700_124362700_C/T
2	chr10_124362706_124362706_C/A
2	chr10_124362707_124362707_C/T
2	chr10_124362711_124362711_C/G
1	chr10_124362716_124362716_G/A
33	chr10_124362723_124362723_C/G
2	chr10_124362727_124362727_T/A
1	chr10_124362739_124362739_G/T
1	chr10_124362740_124362740_A/G
1	chr10_124362740_124362740_A/T
3	chr10_124362743_124362743_C/T
1	chr10_124362744_124362744_T/C
2	chr10_124362745_124362745_G/T
3	chr10_124362752_124362752_A/T
30	chr10_124362754_124362754_A/G
125	chr10_124362755_124362755_T/G
2	chr10_124362765_124362765_C/G
345	chr10_124362765_124362765_C/T
15	chr10_124362766_124362766_G/A
15	chr10_124362767_124362767_C/T
14	chr10_124362774_124362774_C/T
5	chr10_124362775_124362775_G/A
4	chr10_124362778_124362778_T/G
1	chr10_124362797_124362797_T/C
4	chr10_124362822_124362822_G/A
1	chr10_124365358_124365358_G/C
1	chr10_124365382_124365382_C/T
2	chr10_124365421_124365421_T/A
1	chr10_124365429_124365429_G/A
2	chr10_124365437_124365437_G/T
14	chr10_124365448_124365448_A/T
1	chr10_124365457_124365457_G/A
1	chr10_124365463_124365463_C/G
1	chr10_124365469_124365469_T/G
1	chr10_124365475_124365475_C/T
6	chr10_124365477_124365477_A/G
1	chr10_124365482_124365482_G/C
3	chr10_124365483_124365483_A/G
146	chr10_124365486_124365486_C/T
1	chr10_124365497_124365496_-/A
2	chr10_124365505_124365505_T/C
3	chr10_124365511_124365511_G/A
11	chr10_124365519_124365519_G/A
1	chr10_124365521_124365521_T/A
49	chr10_124365535_124365535_G/A
11	chr10_124365535_124365535_G/C
1	chr10_124365541_124365541_C/T
1	chr10_124365549_124365549_A/G
1	chr10_124365551_124365551_G/T
16	chr10_124365552_124365552_C/T
2618	chr10_124365554_124365554_C/T
6	chr10_124365555_124365555_G/A
1	chr10_124365555_124365555_G/T
329	chr10_124365566_124365566_G/A
1	chr10_124365567_124365567_G/A
3	chr10_124365568_124365568_T/C
2	chr10_124365577_124365577_C/G
6	chr10_124365588_124365588_A/G
7	chr10_124365592_124365592_T/C
1	chr10_124365594_124365594_T/C
3	chr10_124365596_124365596_C/T
299	chr10_124365597_124365597_G/A
1	chr10_124365603_124365603_C/T
1	chr10_124365607_124365607_A/G
2	chr10_124365609_124365609_A/G
1	chr10_124365613_124365613_G/A
1	chr10_124365622_124365622_G/C
1	chr10_124365632_124365632_C/T
2	chr10_124365635_124365635_C/A
9	chr10_124365639_124365639_A/G
1	chr10_124365640_124365640_T/A
3	chr10_124365649_124365649_C/T
1	chr10_124365650_124365650_T/A
2	chr10_124365654_124365654_A/G
2	chr10_124365655_124365655_C/G
13	chr10_124365670_124365670_T/C
1	chr10_124365672_124365673_AA/-
3	chr10_124365676_124365676_C/T
4	chr10_124365684_124365684_T/C
4	chr10_124365686_124365686_A/C
6	chr10_124365693_124365693_C/T
1	chr10_124365699_124365699_G/A
2	chr10_124365700_124365700_G/A
1	chr10_124365714_124365714_C/G
2865	chr10_124365714_124365714_C/T
17	chr10_124365715_124365715_G/A
1	chr10_124365733_124365733_G/C
1	chr10_124365754_124365754_T/C
2	chr10_124365762_124365762_A/G
5	chr10_124365767_124365767_A/C
39	chr10_124365767_124365767_A/G
2	chr10_124365771_124365771_T/A
2	chr10_124365774_124365774_C/A
1	chr10_124365778_124365780_TGA/-
1	chr10_124365786_124365786_C/A
1	chr10_124365792_124365792_C/T
91	chr10_124365794_124365794_T/C
39	chr10_124365797_124365797_A/T
6	chr10_124365798_124365798_T/A
4	chr10_124365810_124365810_T/G
2	chr10_124365815_124365815_C/A
2	chr10_124365818_124365818_C/G
1	chr10_124365830_124365830_C/T
1	chr10_124365876_124365876_G/A
2	chr10_124914461_124914461_A/-
1	chr10_124921901_124921901_T/A
1	chr10_124922266_124922266_T/-
1	chr10_124922267_124922267_G/C
56	chr10_124924619_124924619_T/A
42	chr10_127584537_127584537_G/A
15	chr10_127584537_127584537_G/C
19	chr10_127584537_127584537_G/T
47	chr10_127584545_127584545_C/A
21	chr10_127584545_127584545_C/G
5	chr10_127584611_127584611_G/A
8	chr10_127584639_127584639_G/T
5	chr10_127584659_127584659_C/T
6	chr10_127584669_127584669_C/T
11	chr10_127584691_127584691_C/A
1	chr10_127584706_127584706_C/G
27	chr10_127584719_127584719_C/A
24	chr10_127584722_127584722_G/A
51	chr10_127584755_127584755_G/A
54	chr10_127584767_127584767_C/A
10	chr10_127584802_127584802_C/T
9	chr10_127584811_127584811_G/C
26	chr10_127584821_127584821_C/T
158	chr10_127584826_127584826_G/A
61	chr10_127584844_127584844_G/A
23	chr10_127584927_127584927_G/C
26	chr10_127584928_127584928_G/A
107	chr10_127585006_127585006_G/T
93	chr10_127585011_127585011_C/G
791	chr10_127585015_127585015_G/T
141	chr10_127585033_127585033_C/T
95	chr10_127585035_127585035_C/G
478	chr10_127585090_127585090_C/A
938	chr10_127585090_127585090_C/T
21	chr10_127585104_127585104_T/A
64	chr10_127585120_127585120_G/C
969	chr10_127585150_127585150_C/A
2024	chr10_127585169_127585169_G/C
3938	chr10_127585208_127585208_G/A
1	chr10_127585218_127585218_C/G
3107	chr10_127585263_127585263_C/T
3491	chr10_127585288_127585288_C/A
121	chr10_127585360_127585360_C/A
9	chr10_127585408_127585408_G/C
9	chr10_127585414_127585414_A/G
20	chr10_127585426_127585426_C/T
8	chr10_127585434_127585434_C/T
1	chr10_129899680_129899680_T/G
5	chr10_129899902_129899902_A/G
3	chr10_14974946_14974946_C/A
87	chr10_14975090_14975089_-/T
2	chr10_14976414_14976414_G/C
1	chr10_14976876_14976876_A/G
4	chr10_14976966_14976967_TT/-
3	chr10_14976973_14976972_-/AT
4	chr10_14977612_14977612_C/A
1	chr10_14982016_14982019_AGTT/-
6	chr10_17794204_17794204_A/-
8	chr10_17794209_17794209_G/T
5	chr10_17794229_17794229_G/T
1	chr10_17794230_17794230_G/C
16	chr10_17794257_17794257_G/C
1	chr10_17794258_17794258_G/T
9	chr10_17794260_17794260_A/T
1	chr10_17794270_17794270_T/A
1	chr10_17794273_17794273_T/C
2	chr10_17794277_17794277_A/G
1	chr10_17794280_17794280_T/-
1	chr10_17794281_17794281_T/A
1	chr10_17794282_17794282_G/A
1	chr10_17794301_17794301_T/C
1	chr10_17794309_17794309_G/A
1	chr10_17794314_17794314_T/C
3	chr10_17794321_17794321_C/T
1	chr10_17794322_17794322_G/A
2	chr10_17794325_17794325_G/A
1	chr10_17794346_17794346_G/T
1	chr10_17794349_17794349_G/A
65	chr10_17794354_17794354_C/G
1	chr10_17794362_17794362_C/A
12	chr10_17794369_17794369_C/G
1	chr10_17794369_17794369_C/T
1	chr10_17794370_17794370_G/A
3	chr10_17794379_17794379_G/C
2	chr10_17794385_17794385_T/A
1	chr10_17794392_17794392_C/T
2	chr10_17794394_17794394_G/A
48	chr10_17794394_17794394_G/T
3	chr10_17794401_17794401_A/G
1	chr10_17794415_17794415_A/G
241	chr10_17794417_17794417_A/G
3	chr10_17794420_17794420_T/C
1	chr10_17794429_17794429_A/G
1	chr10_17794434_17794434_A/G
1	chr10_17794449_17794449_C/T
1	chr10_17794452_17794452_G/A
1	chr10_17794456_17794456_T/C
1	chr10_17794457_17794457_A/G
24	chr10_17794471_17794471_G/A
276	chr10_17794492_17794492_G/T
174	chr10_17794496_17794496_C/T
1	chr10_17794498_17794498_T/C
4	chr10_17794523_17794523_C/T
2	chr10_17794534_17794534_C/G
2	chr10_17794550_17794550_T/A
1	chr10_17794592_17794592_G/A
6	chr10_17794615_17794615_G/C
2855	chr10_17817963_17817963_T/C
2	chr10_17817968_17817968_A/T
4	chr10_17817976_17817976_G/C
1	chr10_17817977_17817977_A/G
1	chr10_17817992_17817992_A/G
1	chr10_17817994_17817994_A/C
2	chr10_17817998_17817998_T/G
1	chr10_17817999_17817999_A/T
1	chr10_17818017_17818017_T/A
6	chr10_17818018_17818018_C/A
6	chr10_17818022_17818022_A/G
9	chr10_17818040_17818040_A/C
201	chr10_17818040_17818040_A/G
17	chr10_17818044_17818044_A/G
1	chr10_17818051_17818051_C/T
1	chr10_17818056_17818056_A/T
1	chr10_17818076_17818076_C/A
1	chr10_17818084_17818084_G/T
2	chr10_17818087_17818087_C/T
2	chr10_17818107_17818107_C/G
1	chr10_17818109_17818109_C/G
1	chr10_17818156_17818156_A/G
2	chr10_17818173_17818173_A/C
2	chr10_17818176_17818176_G/T
1	chr10_17818195_17818195_T/C
6	chr10_17837862_17837862_T/C
11	chr10_17837876_17837876_A/T
1	chr10_17837885_17837885_A/T
2	chr10_17837892_17837892_A/G
63	chr10_17837920_17837920_G/A
2	chr10_17837923_17837923_G/A
3	chr10_17837931_17837931_G/T
1	chr10_17837934_17837934_C/G
1	chr10_17837947_17837947_C/T
1	chr10_17837968_17837968_C/T
6	chr10_17837974_17837974_C/T
1	chr10_17837979_17837979_C/G
1	chr10_17837981_17837981_A/G
1	chr10_17837984_17837984_G/T
2	chr10_17838009_17838009_T/C
1	chr10_17838026_17838026_C/G
1	chr10_17838026_17838026_C/T
3	chr10_17838040_17838040_C/T
3	chr10_17838047_17838047_A/G
34	chr10_17838052_17838052_G/A
1	chr10_17838058_17838058_T/A
1	chr10_17838060_17838060_A/G
1	chr10_17838064_17838064_G/A
1	chr10_17838084_17838084_A/C
1	chr10_17838103_17838103_C/T
1	chr10_17838104_17838104_C/T
38	chr10_17838113_17838113_C/T
1	chr10_17838124_17838124_G/C
13	chr10_17838135_17838135_C/T
1	chr10_17838136_17838136_G/A
2	chr10_17838138_17838138_C/T
5	chr10_17838139_17838139_G/A
1	chr10_17838144_17838144_G/A
233	chr10_17838147_17838147_C/G
8	chr10_17838147_17838147_C/T
1	chr10_17838157_17838157_T/C
2	chr10_17838170_17838170_C/G
1	chr10_17838190_17838190_C/T
10	chr10_17838191_17838191_G/A
4	chr10_17838193_17838193_T/C
3	chr10_17838224_17838224_C/T
3	chr10_17838238_17838238_G/C
3	chr10_17838250_17838250_C/G
1	chr10_17838257_17838257_C/A
525	chr10_17838274_17838274_C/T
2	chr10_17838275_17838275_T/A
1	chr10_17838278_17838278_C/T
1	chr10_17838283_17838283_G/A
1	chr10_17838305_17838305_C/A
107	chr10_17838326_17838326_C/T
45	chr10_17838327_17838327_G/A
2	chr10_17838330_17838332_CTG/-
1	chr10_17838336_17838336_C/T
1	chr10_17838339_17838339_G/C
5	chr10_17838347_17838347_A/G
1	chr10_17838350_17838350_C/T
1	chr10_17838351_17838351_G/A
2	chr10_17838366_17838366_G/C
4	chr10_17838399_17838399_G/A
3	chr10_17838409_17838409_T/G
8	chr10_17838417_17838417_A/C
3	chr10_17838425_17838425_C/T
2	chr10_17838444_17838444_T/G
6	chr10_17838451_17838451_A/G
1	chr10_17838460_17838460_C/A
6	chr10_17838465_17838465_A/G
1	chr10_17838469_17838469_G/C
1	chr10_17838472_17838472_T/C
2	chr10_17838496_17838496_C/A
1	chr10_17838518_17838518_C/T
1	chr10_17838521_17838521_G/C
1	chr10_17838528_17838528_C/G
1	chr10_17838612_17838612_A/T
5	chr10_17851386_17851386_C/T
1	chr10_17851411_17851411_G/A
3	chr10_17851425_17851425_C/G
28	chr10_17851451_17851451_A/C
1	chr10_17851456_17851456_C/A
4	chr10_17851463_17851463_C/T
1	chr10_17851475_17851475_C/A
1	chr10_17851483_17851483_C/G
2	chr10_17851484_17851484_T/C
1	chr10_17851494_17851494_C/T
1	chr10_17851505_17851505_C/T
13	chr10_17851513_17851513_G/A
1	chr10_17865517_17865517_G/A
17	chr10_17869446_17869446_C/G
3	chr10_17869448_17869448_G/A
2	chr10_17869454_17869454_C/G
1	chr10_17869470_17869470_G/A
64	chr10_17869496_17869496_G/A
1	chr10_17869510_17869510_A/G
2	chr10_17869525_17869525_C/G
1	chr10_17869544_17869544_T/C
1	chr10_17869547_17869547_A/T
2	chr10_17869551_17869551_G/A
586	chr10_17869569_17869569_T/C
2	chr10_17869590_17869590_G/T
2	chr10_17869600_17869600_G/C
5	chr10_17869629_17869629_T/G
3	chr10_17869637_17869637_G/A
1	chr10_17869639_17869639_T/A
2	chr10_17869640_17869640_C/T
1	chr10_17869641_17869641_G/A
8	chr10_17869669_17869669_A/G
43	chr10_17869678_17869678_G/A
1	chr10_17869681_17869681_A/G
1	chr10_17869682_17869682_C/A
2	chr10_17869682_17869682_C/T
1	chr10_17869712_17869712_A/T
1	chr10_17869723_17869723_T/C
1	chr10_17869724_17869724_G/A
9	chr10_17869742_17869742_T/C
2	chr10_17869757_17869757_C/T
1	chr10_17882774_17882774_C/T
1	chr10_17887165_17887165_G/T
1	chr10_17887267_17887267_T/C
5	chr10_17887268_17887268_A/T
5	chr10_17887269_17887269_A/C
1	chr10_17887284_17887284_C/T
1	chr10_17887398_17887398_G/T
3	chr10_17887406_17887406_C/A
1	chr10_17887441_17887441_T/-
1	chr10_17887450_17887450_G/T
1	chr10_17887460_17887460_T/C
5	chr10_17887464_17887464_T/A
3	chr10_17887467_17887467_A/G
3	chr10_17887478_17887478_T/G
40	chr10_17887495_17887495_T/G
1	chr10_17887497_17887497_C/A
4	chr10_17887523_17887523_C/T
7	chr10_17887524_17887524_G/A
1	chr10_17887525_17887525_C/A
27	chr10_17887571_17887571_T/C
27	chr10_17894945_17894945_T/A
2	chr10_17894949_17894949_T/C
1	chr10_17894951_17894951_C/A
1	chr10_17894967_17894967_C/T
2	chr10_17894970_17894970_G/A
1	chr10_17894983_17894983_T/A
3	chr10_17894986_17894986_C/T
1	chr10_17894987_17894987_G/A
365	chr10_17894998_17894998_C/T
1	chr10_17895016_17895015_-/T
1	chr10_17895017_17895018_AT/-
1	chr10_17895020_17895020_C/G
1	chr10_17895022_17895021_-/TTT
1	chr10_17895048_17895048_C/A
1	chr10_17895049_17895049_C/T
2	chr10_17895057_17895057_C/T
4	chr10_17895058_17895058_G/A
55	chr10_17895075_17895075_G/A
18	chr10_17895079_17895079_A/G
1745	chr10_17895082_17895082_A/G
1287	chr10_17895109_17895109_G/A
4	chr10_17895121_17895121_G/A
1	chr10_17895143_17895143_C/G
1	chr10_17895148_17895148_A/C
1	chr10_17895174_17895174_C/T
2	chr10_17895175_17895175_G/A
1	chr10_17895185_17895185_T/A
1	chr10_17898323_17898323_A/C
26	chr10_17898404_17898404_T/C
1	chr10_17903410_17903410_A/G
2	chr10_17903419_17903419_A/T
3	chr10_17903435_17903435_A/G
1	chr10_17903436_17903436_C/T
1	chr10_17903440_17903440_C/T
1	chr10_17903441_17903441_G/A
1	chr10_17903450_17903450_A/G
1	chr10_17903504_17903504_T/C
10	chr10_17903509_17903509_A/G
2	chr10_17903525_17903525_T/C
1	chr10_17903528_17903528_A/G
1	chr10_17903539_17903539_A/-
2	chr10_17903544_17903544_A/G
2	chr10_17903546_17903546_G/C
1	chr10_17903568_17903568_A/G
12	chr10_17908555_17908555_C/T
3	chr10_17908574_17908574_G/A
1	chr10_17908673_17908673_C/T
2	chr10_17908682_17908682_T/A
1	chr10_17908694_17908694_C/A
1	chr10_17908695_17908695_G/A
1	chr10_17908713_17908713_C/T
2	chr10_17908727_17908727_C/T
1	chr10_17908731_17908731_G/A
1	chr10_17908742_17908742_C/T
1	chr10_17908785_17908785_T/C
1	chr10_17908830_17908830_A/G
2	chr10_17912212_17912212_T/A
2	chr10_17912219_17912219_C/T
2	chr10_17912247_17912247_A/G
3	chr10_17912250_17912250_A/G
1	chr10_17912256_17912261_AGCTGT/-
2	chr10_17912264_17912264_G/A
5	chr10_17912290_17912290_G/A
1	chr10_17912291_17912291_T/G
1	chr10_17912299_17912299_A/T
1	chr10_17912301_17912301_C/G
4	chr10_17912304_17912304_G/A
2	chr10_17912321_17912321_C/G
1	chr10_17912331_17912339_ACTTAGCTA/-
2	chr10_17912334_17912337_TAGC/-
1	chr10_17912344_17912344_C/T
2	chr10_17912346_17912346_A/G
2	chr10_17912376_17912376_G/A
3	chr10_17912381_17912381_A/T
2	chr10_17912385_17912385_C/T
1	chr10_17912389_17912389_A/T
2	chr10_17912392_17912392_G/A
13	chr10_17912404_17912404_G/T
2	chr10_17912405_17912405_A/T
2	chr10_17912409_17912409_C/T
2	chr10_17912418_17912418_G/C
4	chr10_17912425_17912425_A/G
5	chr10_17912762_17912762_C/T
1	chr10_17912784_17912784_T/A
2	chr10_17912785_17912785_G/A
1	chr10_17912801_17912801_A/C
9	chr10_17912820_17912820_T/C
1	chr10_17912826_17912826_A/G
4	chr10_17912828_17912828_C/A
3	chr10_17912832_17912832_T/C
3	chr10_17912851_17912851_A/G
6	chr10_17912857_17912857_T/C
1	chr10_17912893_17912893_G/A
828	chr10_17912905_17912905_T/C
1	chr10_17912906_17912906_G/A
1	chr10_17912917_17912917_A/C
1	chr10_17912917_17912917_A/G
1	chr10_17912926_17912926_T/C
1	chr10_17912930_17912930_T/C
4	chr10_17912960_17912960_A/G
1	chr10_17912967_17912967_A/T
2	chr10_17912969_17912969_A/G
1	chr10_17912982_17912982_T/A
79	chr10_17912988_17912988_G/A
1	chr10_17913964_17913963_-/A
6	chr10_17913967_17913967_G/T
208	chr10_17913968_17913968_G/T
1	chr10_17914039_17914039_A/G
1	chr10_17914043_17914043_T/C
20	chr10_17914062_17914062_G/A
2	chr10_17914078_17914078_A/G
1	chr10_17914106_17914106_A/T
1	chr10_17914163_17914163_A/G
1	chr10_17915722_17915722_T/C
1	chr10_17915724_17915724_G/A
19	chr10_17915738_17915738_A/G
2	chr10_17915778_17915778_T/C
5	chr10_17915806_17915806_A/C
1	chr10_17915808_17915808_A/C
1	chr10_17915811_17915811_C/G
2	chr10_17915815_17915815_G/C
1	chr10_17915825_17915825_G/T
1	chr10_17915828_17915828_C/T
1	chr10_17915834_17915834_G/A
11	chr10_17915843_17915843_T/C
1	chr10_17915845_17915845_T/A
1	chr10_17915857_17915857_C/T
1	chr10_17915863_17915863_T/C
23	chr10_17915885_17915885_C/T
10	chr10_17915903_17915903_A/G
183	chr10_17915905_17915905_G/T
1	chr10_17915906_17915905_-/A
1	chr10_17915916_17915916_T/A
1	chr10_17915934_17915934_G/A
1	chr10_17917070_17917070_A/G
3	chr10_17917077_17917077_T/C
1	chr10_17917079_17917079_G/A
1	chr10_17917120_17917120_A/G
1	chr10_17917151_17917151_T/C
1	chr10_17917163_17917163_A/G
1	chr10_17917186_17917186_C/T
2	chr10_17917188_17917188_C/T
1	chr10_17917193_17917193_G/A
1	chr10_17917263_17917263_T/C
1	chr10_17917264_17917264_A/G
1	chr10_17917266_17917266_G/A
1	chr10_17917273_17917273_C/T
1	chr10_17917305_17917305_T/G
1	chr10_17919873_17919873_G/C
27	chr10_17919892_17919892_C/T
1	chr10_17919898_17919898_C/A
138	chr10_17919918_17919918_A/G
4	chr10_17919934_17919934_C/A
1	chr10_17919990_17919990_C/A
13	chr10_17920003_17920003_A/G
2	chr10_17920027_17920027_C/-
3	chr10_17920058_17920058_T/G
3	chr10_17920060_17920060_T/A
1	chr10_17920076_17920076_A/T
5	chr10_17920106_17920106_G/A
2	chr10_17921641_17921641_C/T
25	chr10_17921657_17921657_G/A
2	chr10_17921668_17921668_C/-
3	chr10_17921703_17921703_G/A
1	chr10_17922524_17922524_C/A
1	chr10_17922571_17922571_C/T
1	chr10_17922572_17922572_G/A
1	chr10_17923061_17923061_G/T
1	chr10_17923074_17923074_C/G
1	chr10_17923146_17923146_T/C
1	chr10_17923243_17923243_A/G
3	chr10_17927303_17927303_A/G
8	chr10_17927345_17927345_C/T
1	chr10_17927353_17927353_A/C
1	chr10_17927355_17927355_G/A
1	chr10_17936175_17936175_C/T
1	chr10_17936195_17936195_C/-
1	chr10_17936200_17936200_T/C
1	chr10_17936205_17936205_C/T
501	chr10_17936209_17936209_A/G
1	chr10_17936230_17936230_G/A
1	chr10_17936250_17936250_A/G
2	chr10_17936258_17936258_A/T
2	chr10_17936273_17936273_T/C
3	chr10_17936286_17936286_C/T
2	chr10_17936296_17936296_C/A
1	chr10_17936299_17936299_G/A
1	chr10_17936329_17936329_T/C
2	chr10_17936344_17936344_C/T
1	chr10_17936381_17936381_T/C
1	chr10_17936402_17936406_TTTCT/-
3	chr10_17939984_17939984_T/A
1	chr10_17939993_17939993_A/G
2	chr10_17939996_17939996_C/T
121	chr10_17940002_17940002_T/C
2	chr10_17940009_17940009_T/C
2	chr10_17940051_17940051_T/C
2	chr10_17940056_17940056_G/T
1	chr10_17940073_17940073_C/T
1	chr10_17940094_17940094_T/C
3	chr10_17940098_17940098_A/C
15	chr10_17940122_17940122_C/A
1	chr10_17940123_17940123_A/C
1	chr10_17940145_17940145_A/G
1	chr10_17940152_17940152_G/A
5	chr10_17940175_17940175_A/G
2	chr10_17940180_17940180_C/G
391	chr10_17940221_17940221_G/A
1	chr10_17940228_17940228_C/A
4	chr10_17940249_17940249_C/A
3	chr10_17940250_17940250_G/A
449	chr10_17940260_17940260_C/T
1	chr10_17940261_17940261_G/A
1	chr10_17940262_17940262_C/A
3	chr10_17940293_17940293_A/G
1	chr10_17940323_17940323_A/G
1	chr10_17940325_17940325_G/A
1	chr10_17940335_17940335_G/A
1	chr10_17940357_17940357_T/C
1	chr10_17940370_17940370_A/G
3	chr10_17942736_17942736_T/C
2	chr10_17942761_17942761_G/A
2	chr10_17942766_17942766_A/G
2	chr10_17942775_17942775_T/C
1	chr10_17942783_17942783_C/A
1	chr10_17942792_17942792_G/C
7	chr10_17942795_17942795_G/A
1	chr10_17942810_17942810_T/G
2	chr10_17942818_17942818_C/T
3	chr10_17942831_17942831_G/A
1	chr10_17942838_17942838_G/A
80	chr10_17942898_17942898_G/A
5	chr10_17942910_17942910_T/C
1	chr10_17942923_17942923_C/A
5	chr10_17942923_17942923_C/G
2	chr10_17942966_17942966_T/C
3	chr10_17942977_17942977_T/A
1	chr10_17942987_17942987_C/T
3	chr10_17942991_17942991_C/T
1	chr10_17942996_17942996_G/C
4	chr10_17943900_17943900_A/G
1	chr10_17943914_17943914_C/G
1	chr10_17943969_17943969_A/T
3	chr10_17944006_17944006_C/G
1	chr10_17944028_17944028_C/T
1200	chr10_17944030_17944030_G/A
1	chr10_17944046_17944046_G/C
1	chr10_17944052_17944052_A/T
1	chr10_17944075_17944075_C/T
1	chr10_17944091_17944091_T/C
1	chr10_17944118_17944118_C/A
6	chr10_17944118_17944118_C/G
2	chr10_17944130_17944130_C/T
3	chr10_17948825_17948825_A/T
1	chr10_17948837_17948837_T/C
7	chr10_17948841_17948841_C/A
1	chr10_17948848_17948848_A/G
3	chr10_17948852_17948852_T/G
1	chr10_17948869_17948868_-/CAGCTAT
1	chr10_17948883_17948883_A/G
12	chr10_17948892_17948892_C/T
2	chr10_17948902_17948902_G/A
2	chr10_17948923_17948923_A/G
1	chr10_17948952_17948952_T/C
1	chr10_17948955_17948955_C/T
1	chr10_17948983_17948983_A/G
2	chr10_17949009_17949009_G/A
1	chr10_17949010_17949010_T/C
1	chr10_17949027_17949027_A/T
1	chr10_17949050_17949050_A/G
1	chr10_17949059_17949061_TGT/-
92	chr10_17949081_17949081_C/T
3	chr10_17951392_17951392_G/A
4	chr10_17951441_17951441_C/A
3	chr10_17951441_17951441_C/G
1	chr10_17951460_17951460_C/A
2	chr10_17951467_17951467_T/C
3	chr10_17952227_17952227_A/-
1	chr10_17952272_17952272_G/A
1	chr10_17952278_17952278_G/A
1	chr10_17952295_17952295_G/T
1	chr10_17952299_17952299_C/T
8	chr10_17952301_17952301_C/G
7	chr10_17952313_17952313_G/A
2	chr10_17952316_17952316_T/C
1	chr10_17952349_17952349_A/G
1	chr10_17952351_17952351_G/C
1	chr10_17952354_17952354_G/T
1	chr10_17952361_17952361_C/T
5	chr10_17952377_17952377_G/A
1	chr10_17952390_17952390_C/G
2	chr10_17952401_17952401_A/G
7	chr10_17952403_17952403_C/T
120	chr10_17952406_17952406_T/C
1	chr10_17952442_17952442_C/T
1	chr10_17952443_17952443_G/A
1	chr10_17952443_17952443_G/C
7	chr10_17952472_17952472_G/A
1	chr10_17952474_17952474_T/A
1	chr10_17952476_17952476_A/G
1	chr10_17952489_17952489_A/T
4	chr10_17952490_17952490_T/C
1	chr10_17952492_17952492_C/T
2	chr10_17952493_17952493_G/A
3	chr10_17952522_17952522_T/G
2	chr10_17952545_17952545_A/C
1	chr10_17952559_17952559_G/A
1	chr10_24874334_24874334_A/C
2	chr10_24874500_24874501_TG/-
1	chr10_24909963_24909963_A/T
1	chr10_28250568_28250568_G/T
1	chr10_28250581_28250581_T/A
1	chr10_28250610_28250610_C/A
1	chr10_28257707_28257707_G/C
1	chr10_28257719_28257719_A/G
16	chr10_28257726_28257726_T/C
1	chr10_28257732_28257732_G/A
4	chr10_28257737_28257737_C/T
2	chr10_28257738_28257738_G/A
1	chr10_28257743_28257743_T/C
3	chr10_28257750_28257750_A/G
2	chr10_28257751_28257751_T/C
5	chr10_28257755_28257755_G/A
1	chr10_28257757_28257757_G/A
2	chr10_28257768_28257768_G/A
6	chr10_28257773_28257773_A/G
8	chr10_28257775_28257775_G/A
1	chr10_28257783_28257783_T/-
1	chr10_28257787_28257787_C/T
1	chr10_28257790_28257790_G/A
3	chr10_28257798_28257798_G/A
3	chr10_28257806_28257806_C/A
4	chr10_28257806_28257806_C/T
12	chr10_28257807_28257807_G/A
1	chr10_28257807_28257807_G/T
4	chr10_28257808_28257808_T/C
320	chr10_28257808_28257808_T/G
20	chr10_28257826_28257826_A/G
1	chr10_28257827_28257826_-/CTCGT
3	chr10_28257830_28257830_G/A
1	chr10_28257831_28257831_T/G
1	chr10_28257850_28257850_A/C
3948	chr10_28257852_28257852_C/T
9	chr10_28257853_28257853_G/A
3670	chr10_28257853_28257853_G/C
4	chr10_28257862_28257862_G/C
2	chr10_28257871_28257871_C/T
2	chr10_28257872_28257872_G/A
1	chr10_28257873_28257873_T/C
28	chr10_28257883_28257883_A/T
1	chr10_28257908_28257915_TGTGTGTT/-
2	chr10_28257911_28257911_G/A
1	chr10_28257916_28257916_T/C
1	chr10_28257925_28257925_G/C
1	chr10_28257946_28257946_T/G
1	chr10_28257949_28257949_T/C
1	chr10_28258034_28258034_G/A
7	chr10_28258059_28258059_C/A
1	chr10_28259975_28259975_A/-
1	chr10_28260036_28260036_C/A
6	chr10_28260036_28260036_C/T
1	chr10_28260135_28260135_T/A
138	chr10_28260250_28260249_-/G
3	chr10_28283720_28283720_T/G
1	chr10_28283792_28283792_T/G
1	chr10_29580595_29580595_A/C
1	chr10_29580657_29580657_A/T
1	chr10_29580697_29580697_G/A
3	chr10_29580709_29580709_C/T
1	chr10_29580759_29580759_G/A
1	chr10_29580759_29580759_G/C
6	chr10_29580759_29580759_G/T
1	chr10_29580915_29580914_-/G
4	chr10_29581310_29581310_G/C
6	chr10_29581310_29581310_G/T
1	chr10_37458432_37458432_A/C
1	chr10_37458499_37458499_A/G
1	chr10_37458525_37458525_A/C
2	chr10_37458533_37458533_T/G
2	chr10_37458562_37458562_C/G
2	chr10_37458567_37458567_C/T
1	chr10_37458583_37458583_A/C
1	chr10_37458583_37458583_A/T
1	chr10_37458584_37458584_A/C
1	chr10_37458586_37458586_T/C
15	chr10_37458589_37458589_G/A
1	chr10_37458597_37458597_A/T
18	chr10_37458610_37458610_A/G
1	chr10_37458618_37458618_C/T
33	chr10_37458625_37458625_T/A
1	chr10_37458632_37458632_A/G
11	chr10_37458634_37458634_A/C
1	chr10_37458634_37458634_A/G
4	chr10_37458637_37458637_C/A
2	chr10_37458637_37458637_C/G
1	chr10_37458691_37458691_A/C
1	chr10_37458697_37458697_A/G
110	chr10_37462618_37462618_A/T
110	chr10_37462619_37462619_T/A
2	chr10_37462647_37462647_C/T
2	chr10_37462648_37462648_G/T
2	chr10_37462707_37462707_A/T
2	chr10_37462708_37462708_C/T
136	chr10_37462715_37462715_T/-
1	chr10_37462740_37462740_A/C
3	chr10_37462740_37462740_A/T
1	chr10_37462768_37462768_C/T
1	chr10_37462774_37462774_T/C
1	chr10_37462787_37462787_G/C
212	chr10_37464918_37464918_G/A
5	chr10_37464968_37464968_A/G
2	chr10_37464971_37464971_C/T
23	chr10_37464972_37464972_G/C
1	chr10_37464989_37464989_C/T
1	chr10_37464992_37464992_C/G
23	chr10_37464997_37464997_T/G
3	chr10_37464999_37464999_G/A
1	chr10_37465013_37465013_A/G
3	chr10_37465019_37465019_A/G
1	chr10_37465027_37465027_T/G
2	chr10_37465037_37465037_T/C
1	chr10_37465038_37465038_A/G
7	chr10_37465049_37465049_G/C
1	chr10_37465054_37465054_C/T
1	chr10_37465055_37465055_A/G
1	chr10_37465057_37465057_G/T
1	chr10_37465062_37465081_TATCTGTGATTAACCTTTTA/-
1	chr10_37465069_37465069_G/A
9	chr10_37465070_37465070_A/G
9	chr10_37465075_37465075_C/T
2	chr10_37465077_37465077_T/G
1	chr10_37465081_37465081_A/G
2	chr10_37465081_37465081_A/T
1	chr10_37465089_37465089_G/C
1	chr10_37465094_37465094_T/G
26	chr10_37465096_37465096_C/G
18	chr10_37465102_37465102_G/C
109	chr10_37465103_37465103_A/G
2	chr10_37465110_37465110_A/G
1	chr10_37465115_37465115_A/G
4	chr10_37465121_37465121_A/G
2	chr10_37465122_37465122_T/C
1	chr10_37465146_37465145_-/AC
1	chr10_37465146_37465146_G/A
2	chr10_37465147_37465147_G/A
2	chr10_37465148_37465148_T/C
1	chr10_37465152_37465152_A/G
2	chr10_37465153_37465153_T/A
1	chr10_37465156_37465156_G/A
4	chr10_37465163_37465163_A/G
1	chr10_37465164_37465163_-/T
1	chr10_37465164_37465164_T/C
8	chr10_37465187_37465187_G/T
1	chr10_37465188_37465188_A/C
2	chr10_37465189_37465189_T/C
689	chr10_37465191_37465191_T/C
1	chr10_37465202_37465202_A/C
1	chr10_37465207_37465207_G/C
162	chr10_37465220_37465220_T/C
2	chr10_37465233_37465233_C/G
2	chr10_37465236_37465236_C/T
11	chr10_37465237_37465237_A/C
1	chr10_37465243_37465243_C/T
1	chr10_37465245_37465245_C/A
2	chr10_37465246_37465246_C/T
1	chr10_37465248_37465248_C/T
2	chr10_37465249_37465249_C/T
1	chr10_37465264_37465264_A/G
1	chr10_37465302_37465302_A/G
49	chr10_43881432_43881431_-/CAGT
83	chr10_43881454_43881453_-/TAGA
1	chr10_46272632_46272632_A/T
11	chr10_46272663_46272663_A/G
26	chr10_46272679_46272679_C/T
3	chr10_46272702_46272702_T/G
1	chr10_46551657_46551657_C/A
10	chr10_46551747_46551747_G/A
1	chr10_46551779_46551779_T/C
1	chr10_46551801_46551801_T/A
1	chr10_46552605_46552605_G/A
1	chr10_46552635_46552635_G/C
1	chr10_46552650_46552650_C/G
9	chr10_47161866_47161866_T/G
1	chr10_47161885_47161885_C/G
3891	chr10_47161891_47161891_T/-
1	chr10_47161891_47161891_T/C
1	chr10_47161901_47161901_C/T
33	chr10_47161902_47161902_G/A
1	chr10_47161905_47161905_C/A
1	chr10_47161907_47161907_A/C
9	chr10_47161907_47161907_A/G
2	chr10_47161934_47161934_C/G
4	chr10_47161940_47161940_G/A
4	chr10_47161943_47161943_A/C
2	chr10_47161944_47161944_T/G
3	chr10_47161948_47161948_G/A
2	chr10_47161950_47161950_G/A
2	chr10_47161964_47161964_C/A
1	chr10_47161978_47161978_C/A
9	chr10_47161978_47161978_C/T
6	chr10_47161979_47161979_G/A
1	chr10_47161981_47161981_G/A
19	chr10_47162003_47162003_C/T
315	chr10_47162004_47162004_G/A
701	chr10_47162008_47162008_G/A
2	chr10_47162008_47162008_G/C
2	chr10_47162012_47162012_T/G
1	chr10_47162014_47162014_G/A
6	chr10_47162020_47162020_A/G
1	chr10_47162024_47162024_C/T
1	chr10_47162026_47162026_C/G
11	chr10_47162028_47162028_C/A
10	chr10_47162030_47162030_C/T
17	chr10_47162031_47162031_G/A
1	chr10_47162035_47162035_G/C
2	chr10_47162036_47162036_G/A
1	chr10_47162038_47162037_-/GGATC
18	chr10_47162043_47162043_G/A
1	chr10_47162050_47162050_C/G
19	chr10_47162062_47162062_T/C
1	chr10_47162065_47162065_C/G
2	chr10_47162070_47162070_C/A
2	chr10_47162076_47162076_G/A
3	chr10_47162076_47162076_G/T
1	chr10_47162079_47162079_C/T
2	chr10_47162081_47162081_A/G
2	chr10_47162090_47162090_G/A
1	chr10_47162092_47162092_G/A
7	chr10_47162094_47162094_G/A
2	chr10_47162096_47162096_C/T
1	chr10_47162107_47162107_A/C
1	chr10_47162131_47162131_A/G
45	chr10_47162136_47162137_AG/-
3	chr10_47162137_47162137_G/A
3	chr10_47162139_47162139_G/A
4	chr10_47162147_47162147_G/A
5	chr10_47162147_47162147_G/T
2	chr10_47162153_47162153_T/C
3	chr10_47162159_47162159_T/C
5	chr10_47162164_47162164_G/C
2	chr10_47162172_47162172_T/G
69	chr10_47162175_47162175_A/G
5	chr10_47162175_47162175_A/T
1	chr10_47162184_47162184_G/A
2	chr10_47162191_47162191_A/G
4	chr10_47162196_47162196_G/A
1	chr10_47162201_47162201_G/A
8	chr10_47162207_47162207_G/A
2	chr10_47162215_47162215_C/T
1	chr10_47162219_47162219_T/C
2	chr10_47162235_47162235_C/T
1	chr10_47162236_47162236_A/-
2	chr10_47162241_47162242_TA/-
3	chr10_47162244_47162244_G/A
2	chr10_47162255_47162255_G/C
1	chr10_47162257_47162257_T/C
6	chr10_47162271_47162271_G/A
1	chr10_47162274_47162274_G/C
35	chr10_47162280_47162280_G/C
7	chr10_47162303_47162303_G/A
2	chr10_47162303_47162303_G/T
2	chr10_47164845_47164845_C/T
1	chr10_47164861_47164861_C/G
1	chr10_47164866_47164866_G/A
1	chr10_47164867_47164867_T/C
1	chr10_47164880_47164880_C/A
10	chr10_47164881_47164881_G/A
1	chr10_47164890_47164890_A/T
9	chr10_47164896_47164896_G/C
1	chr10_47164899_47164899_G/A
1	chr10_47164916_47164916_G/A
1	chr10_47164922_47164922_G/A
7	chr10_47164923_47164923_C/T
3	chr10_47164924_47164924_G/A
1	chr10_47164925_47164925_C/T
1	chr10_47164936_47164936_G/A
1	chr10_47164940_47164940_G/A
1	chr10_47164943_47164942_-/T
28	chr10_47164956_47164956_C/A
1	chr10_47164956_47164956_C/T
2	chr10_47164983_47164983_T/A
1	chr10_47164990_47164990_T/-
1	chr10_47165022_47165022_G/T
11	chr10_47165032_47165032_T/C
1	chr10_47174612_47174614_CCA/-
1	chr10_47174620_47174620_A/G
1	chr10_47174623_47174623_C/T
1	chr10_47174629_47174629_G/A
66	chr10_47174654_47174654_A/G
1	chr10_47174656_47174656_G/A
6	chr10_47174661_47174661_G/A
70	chr10_47174693_47174693_G/A
2	chr10_47174954_47174954_C/T
2	chr10_47174960_47174960_T/A
1	chr10_47234304_47234304_C/G
1	chr10_47234326_47234326_T/C
1	chr10_47234339_47234339_A/G
1	chr10_47234342_47234342_T/C
7	chr10_47234346_47234346_C/A
1	chr10_47234386_47234386_C/A
2	chr10_47234393_47234393_T/C
8	chr10_47234398_47234398_G/A
1	chr10_47234402_47234402_A/G
1	chr10_47234410_47234410_C/-
3	chr10_47234438_47234438_A/G
4	chr10_47234447_47234447_G/C
1	chr10_47234459_47234459_G/A
1	chr10_47234460_47234460_A/G
1	chr10_47234465_47234465_T/C
147	chr10_47234467_47234467_G/C
1	chr10_47234477_47234477_T/A
2	chr10_47234483_47234483_A/G
1	chr10_47234485_47234485_G/T
1	chr10_47234486_47234486_C/T
1	chr10_47234511_47234511_T/C
1	chr10_47234536_47234536_A/G
1	chr10_47235341_47235341_A/G
2	chr10_47235354_47235354_C/G
4	chr10_47235359_47235359_C/T
3	chr10_47235360_47235360_C/T
1	chr10_47235362_47235362_C/T
2	chr10_47235365_47235365_T/C
1	chr10_47235368_47235368_T/A
1	chr10_47235369_47235369_C/A
33	chr10_47235369_47235369_C/T
1	chr10_47235372_47235372_G/T
1	chr10_47235386_47235386_T/C
1	chr10_47235389_47235389_T/C
3	chr10_47235408_47235408_T/C
2	chr10_47235420_47235420_C/T
18	chr10_47235429_47235429_C/T
1	chr10_47235435_47235435_T/C
12	chr10_47235454_47235454_T/C
961	chr10_47235455_47235455_C/T
1	chr10_47235456_47235456_G/A
2	chr10_47235456_47235456_G/T
4	chr10_47235458_47235461_TTCT/-
1	chr10_47235472_47235472_C/T
1	chr10_47235488_47235488_T/C
3	chr10_47235490_47235490_G/T
1	chr10_47235493_47235493_G/A
2	chr10_47235494_47235494_G/T
1	chr10_47235499_47235499_G/A
2	chr10_47235502_47235502_G/A
1	chr10_47235508_47235508_G/A
1	chr10_47235516_47235516_C/T
2	chr10_47235530_47235530_A/G
1	chr10_47235536_47235536_T/C
1	chr10_47678576_47678575_-/CCGCTGG
2	chr10_47678668_47678668_A/T
1	chr10_47682697_47682697_A/T
1	chr10_47684254_47684253_-/A
1	chr10_47684255_47684255_G/C
1	chr10_47700755_47700755_T/-
1	chr10_47700812_47700813_TC/-
1	chr10_47903076_47903076_G/A
1	chr10_47903098_47903098_A/G
1	chr10_47903205_47903205_G/A
1	chr10_47941958_47941958_G/T
89	chr10_48006928_48006927_-/TA
1	chr10_48007035_48007035_T/C
11	chr10_48007038_48007038_T/C
2	chr10_48007047_48007047_C/A
1	chr10_48007071_48007071_T/C
2	chr10_48007101_48007101_A/G
43	chr10_48007108_48007108_A/T
19	chr10_48007113_48007113_T/C
42	chr10_48007114_48007114_T/C
1	chr10_48007119_48007119_C/T
1	chr10_48007122_48007122_A/C
3	chr10_48007145_48007145_C/T
4	chr10_48007146_48007146_G/A
6	chr10_48007146_48007146_G/C
3	chr10_48007167_48007167_A/C
2	chr10_48007168_48007168_C/T
2	chr10_48007185_48007185_T/-
3	chr10_48007186_48007186_G/C
2	chr10_48007206_48007206_T/C
58	chr10_48007220_48007220_A/T
4	chr10_48007269_48007269_T/A
2	chr10_48007297_48007297_T/A
1	chr10_48007300_48007300_A/G
3	chr10_48007387_48007387_G/C
1	chr10_48007402_48007402_G/A
3	chr10_48013395_48013395_G/A
4	chr10_48013445_48013445_G/A
1	chr10_48013449_48013449_C/G
100	chr10_48013460_48013459_-/AC
39	chr10_48013460_48013459_-/ACAC
4	chr10_48013460_48013459_-/ACACAC
1	chr10_48013460_48013459_-/ACACACACAC
1	chr10_48013465_48013465_C/G
1	chr10_48013465_48013465_C/T
2	chr10_48013471_48013471_C/A
8	chr10_48013472_48013472_A/T
30	chr10_48013474_48013474_A/G
32	chr10_48013480_48013480_A/G
41	chr10_48013485_48013485_C/T
2	chr10_48013487_48013487_C/T
15	chr10_48013489_48013489_C/T
2	chr10_48013497_48013497_C/T
2	chr10_48013498_48013498_G/A
1	chr10_48013501_48013501_C/A
1	chr10_48013510_48013510_T/C
3	chr10_48013519_48013519_C/T
1	chr10_48013520_48013520_G/A
1	chr10_48013533_48013533_T/C
3	chr10_48013566_48013566_A/C
57	chr10_48013572_48013572_T/C
34	chr10_48013576_48013576_C/T
1	chr10_48013603_48013603_A/G
1	chr10_48013607_48013607_C/T
4	chr10_48013639_48013639_T/C
840	chr10_48013640_48013640_A/C
1	chr10_48013652_48013652_T/A
8	chr10_48017240_48017240_C/T
23	chr10_48017241_48017241_A/C
3	chr10_48017274_48017274_A/G
1	chr10_48017280_48017280_A/-
1	chr10_48017284_48017284_C/T
2	chr10_48017285_48017285_G/A
1	chr10_48017329_48017329_T/C
2	chr10_48017335_48017335_C/T
45	chr10_48017336_48017336_G/A
2	chr10_48017349_48017349_G/C
4	chr10_48017362_48017362_T/C
17	chr10_48017377_48017377_C/T
156	chr10_48017384_48017384_T/C
2	chr10_48017395_48017395_A/G
2	chr10_48017396_48017396_G/A
2	chr10_48017412_48017412_C/T
45	chr10_48017438_48017438_C/A
2	chr10_48017438_48017438_C/T
1	chr10_48017460_48017460_C/T
3	chr10_48017997_48017997_C/T
1	chr10_48018008_48018008_A/G
58	chr10_48018039_48018039_A/G
14	chr10_48018045_48018045_A/G
1	chr10_48018046_48018045_-/ATCTTATGGTGAAGAG
34	chr10_48018046_48018046_G/A
2	chr10_48018072_48018072_T/C
16	chr10_48018077_48018077_A/G
2	chr10_48018083_48018083_A/G
1	chr10_48018086_48018086_T/C
1	chr10_48018095_48018095_A/C
2	chr10_48018124_48018124_C/T
2	chr10_48018134_48018134_G/A
1	chr10_48018146_48018146_T/C
1	chr10_48018148_48018148_C/T
1	chr10_48018168_48018168_T/C
9	chr10_48018174_48018174_C/T
253	chr10_48018189_48018189_C/T
4	chr10_48018190_48018190_G/A
68	chr10_48018203_48018203_A/G
1	chr10_48018210_48018210_C/T
65	chr10_48018214_48018214_G/T
2	chr10_48018239_48018239_T/C
2	chr10_48018266_48018266_T/C
57	chr10_48019301_48019301_T/C
1	chr10_48019304_48019304_C/G
2	chr10_48019340_48019340_G/A
1	chr10_48019391_48019391_A/C
2	chr10_48019394_48019394_G/A
2	chr10_48019396_48019396_C/G
1	chr10_48019397_48019396_-/TGGAT
1	chr10_48019414_48019414_G/C
2	chr10_48019467_48019467_C/G
10	chr10_48020376_48020376_A/G
3	chr10_48020413_48020413_A/G
1	chr10_48020420_48020420_A/G
1	chr10_48020425_48020425_C/T
1	chr10_48020436_48020436_C/T
2	chr10_48020447_48020447_T/C
5	chr10_48020456_48020456_G/A
1	chr10_48020456_48020456_G/T
1	chr10_48020509_48020509_G/A
1	chr10_48020519_48020519_G/A
1	chr10_48020527_48020527_C/A
2	chr10_48020530_48020530_G/A
3	chr10_48020538_48020538_T/C
1	chr10_48020556_48020556_T/C
2	chr10_48020592_48020592_C/T
1	chr10_48020595_48020595_C/T
1	chr10_48020603_48020603_C/G
5	chr10_48027417_48027417_C/A
1	chr10_48027426_48027426_A/C
34	chr10_48027426_48027426_A/G
1	chr10_48027433_48027433_G/C
2	chr10_48027437_48027437_C/A
1	chr10_48027437_48027437_C/T
1	chr10_48027443_48027443_G/A
1	chr10_48027466_48027466_T/C
2	chr10_48027472_48027472_G/A
1	chr10_48027488_48027488_G/T
1	chr10_48027491_48027491_G/C
1	chr10_48027499_48027499_T/C
1	chr10_48027519_48027519_G/A
13	chr10_48027534_48027534_G/A
153	chr10_48027568_48027568_C/T
964	chr10_48027593_48027593_T/C
1	chr10_48027635_48027635_C/T
1	chr10_48032908_48032908_A/G
1	chr10_48033197_48033197_G/A
5	chr10_48047701_48047701_A/G
1	chr10_48047706_48047706_T/G
2	chr10_48047710_48047710_T/C
1	chr10_48047712_48047712_G/T
2	chr10_48047738_48047738_G/A
15	chr10_48047749_48047749_A/G
2	chr10_48047751_48047751_G/T
1	chr10_48047774_48047774_C/A
3	chr10_48047780_48047780_C/G
2	chr10_48047780_48047780_C/T
2	chr10_48047790_48047790_G/T
1	chr10_48047795_48047795_A/G
1	chr10_48047811_48047811_C/G
1	chr10_48048925_48048925_A/G
1	chr10_48049023_48049023_T/G
1	chr10_48050284_48050284_A/G
24	chr10_48050316_48050316_G/C
1	chr10_48050340_48050340_T/C
7	chr10_48050343_48050343_G/A
1	chr10_48050368_48050368_C/A
1	chr10_48050376_48050376_A/T
2	chr10_48050378_48050378_G/C
1	chr10_48050397_48050397_C/T
1	chr10_48050411_48050411_G/C
11	chr10_48050425_48050425_C/T
1	chr10_48050426_48050426_G/A
1	chr10_48050428_48050428_T/G
1	chr10_48050465_48050465_A/T
1	chr10_48050468_48050468_G/A
1	chr10_48050474_48050474_C/G
1	chr10_48050480_48050480_G/A
2	chr10_48050493_48050493_C/T
2	chr10_48050513_48050513_A/T
1	chr10_48050527_48050527_T/C
4	chr10_48050530_48050530_G/A
1	chr10_48050537_48050537_C/A
1	chr10_48196038_48196038_C/T
1	chr10_48196074_48196074_G/A
2	chr10_48196078_48196078_C/T
1	chr10_48196079_48196079_G/A
1	chr10_48196158_48196158_G/-
1	chr10_48196158_48196158_G/A
2	chr10_48196163_48196163_A/G
67	chr10_48196193_48196193_C/T
1	chr10_48196227_48196229_AAG/-
7	chr10_48196251_48196251_G/A
1	chr10_48196251_48196251_G/C
14	chr10_48196267_48196266_-/C
17	chr10_48196267_48196267_T/A
1	chr10_48196272_48196272_G/A
1	chr10_48196288_48196288_G/T
2	chr10_48196295_48196295_G/C
13	chr10_48196308_48196308_G/A
1	chr10_48196315_48196315_G/C
1	chr10_48196323_48196323_C/G
7	chr10_48196337_48196337_C/T
86	chr10_48196348_48196348_C/T
6	chr10_48196358_48196358_G/A
1	chr10_48196358_48196358_G/T
2	chr10_48196359_48196358_-/CTC
6	chr10_48196427_48196427_C/A
2	chr10_5017909_5017909_G/T
2	chr10_5017930_5017930_C/T
1047	chr10_5017931_5017931_G/A
3	chr10_5017931_5017931_G/T
1	chr10_5017947_5017947_T/A
1	chr10_5017949_5017949_T/C
2	chr10_5017951_5017951_G/A
1	chr10_5017962_5017962_C/G
3	chr10_5017966_5017966_T/G
1	chr10_5017973_5017973_T/A
1	chr10_5017983_5017983_T/G
2	chr10_5017986_5017986_T/C
139	chr10_5017992_5017992_T/C
1	chr10_5018003_5018003_G/A
1	chr10_5018004_5018004_T/C
1	chr10_5018005_5018005_A/G
1	chr10_5018007_5018007_T/C
1	chr10_5018032_5018032_T/G
2	chr10_5018034_5018034_C/T
2	chr10_5018037_5018039_TGA/-
1	chr10_5018058_5018058_T/C
1	chr10_5018069_5018069_G/-
1	chr10_5018087_5018087_T/A
1	chr10_5018092_5018092_T/A
1	chr10_5018094_5018094_A/C
1	chr10_5018096_5018096_C/T
1	chr10_5018098_5018098_G/C
4	chr10_5018106_5018106_C/T
62	chr10_5018107_5018107_G/A
8	chr10_5018115_5018115_A/G
1	chr10_5018122_5018122_A/G
8	chr10_5018126_5018126_G/A
697	chr10_5018126_5018129_GTAA/-
1	chr10_5018127_5018127_T/C
1	chr10_5018139_5018139_G/C
1	chr10_5018143_5018143_T/C
4	chr10_5018146_5018146_T/C
1	chr10_5018154_5018154_A/T
22	chr10_5018168_5018168_G/A
10	chr10_5018175_5018175_G/A
1	chr10_5018191_5018191_G/A
1	chr10_5018191_5018191_G/T
1	chr10_5018193_5018193_G/A
2	chr10_5018193_5018193_G/C
1	chr10_5018208_5018208_G/C
1	chr10_5018210_5018210_G/A
1	chr10_5018212_5018212_C/T
4	chr10_5018213_5018213_A/G
1	chr10_5018218_5018218_G/A
2	chr10_5018232_5018232_A/G
1	chr10_5018234_5018234_A/G
6	chr10_5018237_5018237_T/C
1	chr10_5018240_5018240_G/A
1	chr10_5018248_5018248_C/G
1	chr10_5018252_5018252_C/G
1	chr10_5018262_5018262_C/G
860	chr10_5018310_5018310_T/C
622	chr10_5018311_5018311_G/T
1	chr10_5018324_5018324_G/A
2	chr10_5019836_5019836_C/A
4	chr10_5019901_5019900_-/C
1	chr10_5019901_5019901_C/-
1	chr10_5020080_5020080_T/A
270	chr10_5020108_5020108_T/A
5	chr10_5041086_5041086_A/C
1	chr10_5041147_5041147_G/T
2	chr10_5041252_5041252_G/C
8	chr10_5041296_5041296_C/A
62	chr10_5041375_5041375_C/T
69	chr10_5041398_5041398_T/C
1	chr10_5041443_5041443_A/G
1	chr10_5041450_5041450_G/A
56	chr10_5041693_5041693_A/-
58	chr10_5045545_5045545_C/T
74	chr10_5045549_5045549_A/G
14	chr10_5045561_5045561_C/T
242	chr10_5045566_5045566_C/T
1	chr10_5045567_5045567_G/A
2	chr10_5045577_5045577_A/C
4	chr10_5045609_5045609_C/T
1	chr10_5045700_5045700_A/G
1	chr10_5045723_5045723_T/A
7	chr10_5045747_5045752_ATAAAC/-
6	chr10_5045804_5045804_C/A
1	chr10_5045862_5045862_A/G
1	chr10_5046059_5046058_-/TTTT
338	chr10_51370752_51370751_-/A
429	chr10_51370759_51370759_T/C
24	chr10_51370777_51370777_A/G
1	chr10_51370787_51370787_C/A
1305	chr10_51370796_51370795_-/CTGGGTCCTCAGA
2	chr10_51370813_51370813_G/C
1	chr10_51370830_51370830_A/T
2	chr10_51370866_51370866_C/T
8	chr10_51370871_51370871_C/A
9	chr10_51370889_51370889_T/C
1	chr10_51370975_51370975_C/T
3	chr10_51371105_51371105_C/A
1	chr10_51371117_51371117_G/T
1947	chr10_51371123_51371123_T/-
2733	chr10_51371132_51371131_-/C
1	chr10_51371135_51371136_GA/-
1	chr10_51371137_51371137_G/A
1	chr10_51371139_51371139_G/A
1	chr10_51371143_51371143_T/C
237	chr10_51371148_51371148_T/G
2	chr10_51371151_51371151_G/A
4	chr10_51371168_51371168_T/C
1	chr10_51371171_51371171_C/G
3	chr10_51371173_51371173_G/T
1	chr10_51371178_51371178_A/C
1	chr10_51371181_51371181_C/T
2	chr10_51371182_51371182_C/T
1	chr10_51371184_51371184_T/A
3	chr10_51371189_51371189_G/A
1	chr10_51371216_51371216_T/C
2	chr10_51371221_51371221_C/T
1	chr10_51371222_51371222_G/C
31	chr10_51371245_51371245_C/T
942	chr10_51371256_51371256_T/C
677	chr10_51371260_51371260_T/C
2	chr10_51371291_51371291_G/A
4	chr10_51371355_51371355_A/G
3	chr10_51371372_51371372_T/C
9	chr10_51371420_51371420_G/T
1	chr10_51371450_51371450_C/T
1	chr10_51371457_51371457_A/T
1	chr10_51371458_51371458_C/A
5	chr10_51371460_51371460_C/T
4	chr10_51371467_51371467_A/G
2	chr10_51371468_51371468_T/C
1	chr10_51371495_51371495_C/G
22	chr10_51371514_51371514_G/A
1	chr10_51371522_51371522_C/G
30	chr10_51371565_51371565_A/G
10	chr10_51371567_51371567_C/T
11	chr10_51371581_51371581_G/T
1	chr10_51371597_51371597_C/T
4	chr10_51371687_51371686_-/C
4	chr10_51371689_51371689_T/G
2	chr10_51371694_51371694_C/G
3	chr10_51371750_51371750_C/T
4	chr10_51374219_51374218_-/A
1	chr10_51374242_51374241_-/A
1	chr10_51374364_51374364_C/T
28	chr10_51374391_51374391_C/G
2	chr10_51374435_51374435_T/C
1	chr10_51374468_51374468_C/T
1	chr10_51374484_51374484_C/G
1	chr10_51374488_51374488_G/A
1	chr10_51374512_51374512_C/T
2	chr10_51374513_51374513_A/G
1	chr10_51374516_51374516_C/T
1	chr10_51374517_51374517_A/G
1390	chr10_51374521_51374521_T/C
1	chr10_51374530_51374530_G/A
1	chr10_51374535_51374535_T/G
3	chr10_51374547_51374547_A/G
1	chr10_51374562_51374562_C/T
1	chr10_51374574_51374574_A/G
6	chr10_5144635_5144635_T/C
12	chr10_5144638_5144638_C/G
42	chr10_5144657_5144657_C/G
2	chr10_5144745_5144745_G/A
2	chr10_5144768_5144768_C/T
1	chr10_51590201_51590201_G/A
1800	chr10_51606333_51606333_T/C
12	chr10_51606344_51606344_A/G
1	chr10_51606363_51606365_AAG/-
2	chr10_51606370_51606370_A/C
4	chr10_51606377_51606377_A/G
1	chr10_51606385_51606385_T/C
1	chr10_51606386_51606386_T/G
3	chr10_51606396_51606396_T/C
2	chr10_51606400_51606400_C/T
1	chr10_51606403_51606402_-/AGC
2	chr10_51606405_51606405_C/T
3	chr10_51606407_51606407_G/C
10	chr10_51606410_51606410_T/C
3	chr10_51606423_51606423_C/-
125	chr10_51606429_51606429_G/C
1	chr10_51606437_51606437_C/G
1	chr10_51606438_51606438_A/C
2	chr10_51606440_51606440_C/T
1	chr10_51606441_51606441_C/A
4	chr10_51606448_51606448_T/C
1	chr10_51606449_51606449_T/A
2	chr10_51606449_51606449_T/C
4	chr10_51606453_51606453_T/C
2	chr10_51606465_51606465_G/A
1	chr10_51606491_51606491_A/C
1	chr10_51606498_51606498_G/-
2	chr10_51606506_51606506_T/C
1	chr10_51606524_51606524_G/C
1	chr10_51606534_51606534_G/A
3	chr10_51606540_51606540_G/A
2	chr10_51606549_51606549_T/C
3	chr10_51606571_51606571_T/C
2	chr10_51606573_51606573_C/G
3	chr10_51606574_51606574_T/C
9	chr10_51606576_51606576_C/T
1	chr10_51606592_51606592_C/G
1	chr10_51606596_51606596_A/T
1	chr10_51606619_51606619_T/C
3	chr10_51606645_51606645_C/A
96	chr10_51606676_51606676_A/G
62	chr10_51606698_51606698_G/-
2	chr10_51606709_51606709_T/G
1	chr10_51606789_51606789_C/G
40	chr10_51606832_51606831_-/T
3	chr10_51606836_51606838_ACC/-
1	chr10_51606866_51606866_T/C
2	chr10_51606879_51606879_A/G
1	chr10_51606885_51606885_C/A
1	chr10_51606897_51606897_G/A
1	chr10_51606901_51606901_C/T
260	chr10_51606907_51606907_G/A
1	chr10_51606908_51606908_T/C
19	chr10_51606910_51606910_A/C
1	chr10_51606934_51606934_A/G
1	chr10_51606940_51606940_C/T
1	chr10_51606941_51606941_G/A
3	chr10_51606943_51606943_A/T
3	chr10_51606948_51606948_A/G
1	chr10_51606953_51606953_T/C
4	chr10_51606965_51606965_G/T
1	chr10_51606970_51606970_C/G
14	chr10_51606970_51606970_C/T
1	chr10_51606982_51606982_A/G
3	chr10_51606986_51606986_A/C
3	chr10_51606987_51606987_C/A
2	chr10_51606991_51606991_T/C
1	chr10_51607011_51607011_G/A
1	chr10_51607023_51607023_G/C
2	chr10_51607024_51607024_C/T
4	chr10_51607026_51607026_G/A
1	chr10_51607029_51607029_A/G
5	chr10_51607040_51607040_G/A
1	chr10_51607051_51607051_C/T
1	chr10_51607056_51607056_C/T
3	chr10_51607057_51607057_G/A
2	chr10_51607059_51607059_G/T
2	chr10_51607063_51607063_T/C
12	chr10_51607068_51607068_A/G
1	chr10_51607073_51607073_G/A
44	chr10_51607085_51607085_A/G
1	chr10_51607087_51607087_T/C
10	chr10_51607088_51607088_A/G
5	chr10_51607089_51607089_T/C
2	chr10_51607097_51607097_A/T
2	chr10_51607099_51607099_C/T
1	chr10_51607102_51607102_A/C
18	chr10_51607104_51607104_G/C
31	chr10_51607108_51607108_A/C
1	chr10_51607112_51607112_G/-
2	chr10_51607136_51607136_G/A
6	chr10_51607142_51607142_G/A
20	chr10_51607156_51607156_T/C
4	chr10_51607176_51607176_T/C
13	chr10_51607178_51607178_C/T
2	chr10_51607180_51607180_T/G
2	chr10_51607193_51607193_A/G
1	chr10_51607202_51607202_A/C
1	chr10_51607203_51607203_T/C
2	chr10_51607221_51607221_T/G
74	chr10_51607241_51607241_G/T
4	chr10_51607251_51607251_T/G
1	chr10_51610199_51610199_C/T
8	chr10_51610205_51610205_T/C
8	chr10_51610238_51610238_G/A
1	chr10_51610278_51610278_G/T
23	chr10_51610291_51610290_-/T
1	chr10_51610293_51610293_G/A
1	chr10_51610298_51610298_A/C
11	chr10_51610319_51610319_G/A
1	chr10_51610322_51610322_T/C
19	chr10_51610323_51610323_G/A
18	chr10_51610323_51610323_G/T
2	chr10_51610326_51610326_C/G
125	chr10_51610326_51610326_C/T
20	chr10_51610336_51610338_ATG/-
1	chr10_51610350_51610353_TTCT/-
1	chr10_51610353_51610355_TTT/-
3	chr10_51610356_51610355_-/A
3	chr10_51610356_51610356_C/A
1	chr10_51610359_51610358_-/TAAGG
2	chr10_51610371_51610371_A/T
45	chr10_51610372_51610372_T/C
2	chr10_51610378_51610378_G/A
1	chr10_51610380_51610380_G/C
2	chr10_51610381_51610381_A/-
1	chr10_51610383_51610383_C/G
1	chr10_51610388_51610388_C/G
1	chr10_51610404_51610404_A/G
5	chr10_51610406_51610406_A/G
3	chr10_51610420_51610420_G/A
3	chr10_51610424_51610424_C/T
3	chr10_51610427_51610427_T/G
1	chr10_51610431_51610431_C/G
1	chr10_51610458_51610458_G/A
1	chr10_51610472_51610472_A/G
4	chr10_51610473_51610473_G/T
2	chr10_51610476_51610476_T/A
1	chr10_51610507_51610507_C/-
1	chr10_51610510_51610510_T/A
2	chr10_51610510_51610510_T/C
1	chr10_51610516_51610516_A/G
4	chr10_51610520_51610520_T/C
1	chr10_51610535_51610535_A/C
2	chr10_51610542_51610542_G/C
1	chr10_51610544_51610544_C/A
1	chr10_51610545_51610545_C/A
812	chr10_51610548_51610548_G/A
1	chr10_51610548_51610548_G/C
1	chr10_51610551_51610551_C/A
2	chr10_51610551_51610551_C/T
1	chr10_51610552_51610552_G/A
69	chr10_51610552_51610552_G/T
1	chr10_51610558_51610558_T/G
1	chr10_51610559_51610559_T/A
1	chr10_51610569_51610569_C/T
1	chr10_51610580_51610580_C/T
1	chr10_51610592_51610592_G/A
12	chr10_51610601_51610601_A/G
89	chr10_51610604_51610604_G/T
1	chr10_51610652_51610652_C/T
1	chr10_51611021_51611021_C/A
1	chr10_51611035_51611035_C/G
1875	chr10_51611043_51611043_G/T
1	chr10_51611070_51611070_G/C
1	chr10_51611078_51611077_-/T
139	chr10_51611078_51611078_T/C
2	chr10_51611079_51611079_C/A
460	chr10_51611079_51611079_C/T
1	chr10_51611080_51611083_AAGG/-
1	chr10_51611089_51611089_C/G
2	chr10_51611092_51611092_T/C
6	chr10_51611136_51611136_C/T
1	chr10_51611137_51611137_G/A
2	chr10_51611141_51611141_C/A
1	chr10_51611150_51611150_G/A
1	chr10_51611164_51611164_C/T
43	chr10_51611168_51611168_C/T
2	chr10_51611173_51611173_G/A
1	chr10_51611179_51611179_C/T
1	chr10_51611181_51611181_T/A
1	chr10_51611190_51611190_G/C
16	chr10_51611196_51611196_T/G
1	chr10_51611211_51611211_T/C
1	chr10_51612764_51612767_TTGA/-
8	chr10_51612799_51612799_A/G
1	chr10_51612815_51612815_T/C
1	chr10_51612828_51612828_G/A
1	chr10_51612830_51612830_T/C
1	chr10_51612831_51612831_T/C
16	chr10_51612850_51612850_C/A
18	chr10_51612850_51612850_C/T
1	chr10_51612855_51612855_G/A
1	chr10_51612864_51612864_A/G
2	chr10_51612881_51612881_T/A
1	chr10_51612881_51612881_T/C
1	chr10_51612885_51612885_A/C
1	chr10_51612889_51612889_T/C
2	chr10_51612897_51612897_G/C
1	chr10_51612904_51612904_T/C
1	chr10_51612912_51612912_T/A
1	chr10_51612923_51612923_A/C
1	chr10_51612925_51612925_C/T
1	chr10_51612929_51612929_C/G
1	chr10_51612936_51612936_C/T
1	chr10_51612937_51612937_T/C
141	chr10_51612939_51612939_G/C
2	chr10_51612944_51612944_C/T
2	chr10_51612949_51612949_A/G
6	chr10_51612958_51612958_C/T
8	chr10_51612959_51612959_G/A
1	chr10_51612970_51612970_A/G
14	chr10_51612971_51612971_T/C
1	chr10_51612977_51612977_C/G
4	chr10_51612981_51612981_C/T
1	chr10_51612982_51612982_G/A
34	chr10_51612987_51612987_C/T
7	chr10_51612991_51612991_G/A
1	chr10_51613011_51613011_C/A
1	chr10_51613024_51613024_G/C
1	chr10_51613025_51613025_C/A
143	chr10_51613029_51613029_A/G
1	chr10_51613047_51613047_C/A
2	chr10_51613052_51613052_C/A
5	chr10_51613056_51613056_A/G
1	chr10_51613057_51613057_T/A
3	chr10_51613058_51613058_A/G
1	chr10_51613063_51613063_C/T
2	chr10_51613147_51613147_T/C
3	chr10_51613151_51613150_-/TT
595	chr10_51613151_51613151_T/C
1	chr10_51613155_51613155_G/-
2	chr10_51613162_51613162_C/T
2	chr10_51613164_51613164_C/T
1	chr10_51613165_51613165_A/G
2	chr10_51613177_51613177_T/C
1	chr10_51613181_51613181_A/T
8	chr10_51613183_51613183_T/C
1	chr10_51613188_51613188_A/G
1	chr10_51613190_51613190_T/C
1	chr10_51613192_51613193_TT/-
1	chr10_51613193_51613193_T/A
2	chr10_51613194_51613194_G/A
1	chr10_51613219_51613219_T/C
14	chr10_51613223_51613222_-/A
1	chr10_51613225_51613225_G/-
7	chr10_51613225_51613225_G/C
2	chr10_51613226_51613226_C/T
1	chr10_51613229_51613229_C/T
55	chr10_51613231_51613231_T/G
1	chr10_51613233_51613233_C/T
2	chr10_51613237_51613236_-/A
2	chr10_51613240_51613240_C/G
2	chr10_51613241_51613241_G/T
3	chr10_51613242_51613242_T/A
1	chr10_51613249_51613249_G/A
1	chr10_51613250_51613250_G/A
2	chr10_51613257_51613257_C/-
2	chr10_51613268_51613268_C/G
1	chr10_51613277_51613277_T/C
1	chr10_51613278_51613278_T/C
144	chr10_51613285_51613285_G/A
1	chr10_51613289_51613289_G/C
6	chr10_51613300_51613300_C/T
1	chr10_51613309_51613309_A/C
1	chr10_51613314_51613314_A/G
1	chr10_51613317_51613317_A/G
2	chr10_51613321_51613321_T/C
60	chr10_51613324_51613324_T/C
4	chr10_51613334_51613334_C/G
1	chr10_51613346_51613346_C/T
3	chr10_51613348_51613348_C/T
1	chr10_51613350_51613350_C/T
2	chr10_51613357_51613357_C/T
34	chr10_51613358_51613358_A/G
1	chr10_51613389_51613389_A/G
1	chr10_51613409_51613409_A/G
5	chr10_59955041_59955040_-/T
2	chr10_59955774_59955773_-/CG
1210	chr10_59956104_59956104_C/-
2	chr10_60155664_60155664_C/-
2	chr10_70432754_70432754_A/T
1	chr10_74952387_74952386_-/C
1	chr10_74952387_74952387_A/T
1	chr10_74952388_74952388_G/C
1	chr10_74968500_74968500_A/T
1	chr10_74970182_74970182_A/G
1	chr10_74987851_74987851_A/C
1	chr10_74987926_74987926_A/G
1	chr10_7839063_7839063_A/T
1	chr10_7841096_7841095_-/GCAGC
165	chr10_81272313_81272313_G/A
1	chr10_81272333_81272333_C/T
1498	chr10_81272352_81272352_C/A
1	chr10_81272363_81272363_G/C
2	chr10_81272367_81272367_C/G
6	chr10_81272379_81272379_C/T
1	chr10_81272380_81272380_G/A
31	chr10_81272421_81272421_G/A
2	chr10_81272427_81272427_G/A
1	chr10_81272443_81272443_G/A
9	chr10_81272475_81272475_G/C
1	chr10_81272477_81272477_A/G
1	chr10_81272509_81272509_G/C
1	chr10_81272587_81272587_T/C
6	chr10_81272627_81272627_G/A
50	chr10_81272720_81272720_C/T
1	chr10_81272754_81272753_-/GGAGACCTTGGCAA
2	chr10_81272814_81272814_G/C
14	chr10_81272881_81272881_A/G
243	chr10_81371297_81371297_C/G
1	chr10_81371322_81371324_TCC/-
7	chr10_81371363_81371363_G/A
1	chr10_81371398_81371398_G/A
1	chr10_81371443_81371457_CTGGTCTCGCCCGCC/-
967	chr10_81371955_81371962_GAGTGATA/-
8	chr10_81372093_81372093_G/T
1	chr10_81372108_81372108_A/T
[truncated: 39,218 more rows]
