# Supplementary material for: Systematic analysis of paralogous regions in 41,755 exomes uncovers clinically relevant variation
Source: Research Square preprint supplement (doi:10.21203/rs.3.rs-2302399/v1), 2022-11-29
Supplement: Supplementary file 2 [file STable10.xlsx]

## Sheet: STable10
Sample	NrOfSyn	NrOfMiss	NrOfLoF
SAMPLE_20941	3	5	1
SAMPLE_20942	1	8	1
SAMPLE_1	11	11	1
SAMPLE_20943	4	15	2
SAMPLE_20944	6	10	2
SAMPLE_16457	2	8	0
SAMPLE_20945	3	9	1
SAMPLE_20946	8	25	1
SAMPLE_20947	8	14	1
SAMPLE_4	8	13	2
SAMPLE_20948	9	16	5
SAMPLE_20949	3	7	1
SAMPLE_20950	5	10	7
SAMPLE_7	3	10	0
SAMPLE_20951	5	11	1
SAMPLE_20952	5	10	0
SAMPLE_20953	6	11	2
SAMPLE_20954	7	12	2
SAMPLE_20955	11	6	2
SAMPLE_20956	11	9	0
SAMPLE_10	2	4	1
SAMPLE_13	1	3	0
SAMPLE_20957	4	6	1
SAMPLE_20958	19	22	4
SAMPLE_20959	14	18	2
SAMPLE_20960	4	5	1
SAMPLE_20961	4	8	0
SAMPLE_20962	4	15	1
SAMPLE_16	5	9	4
SAMPLE_19	6	4	0
SAMPLE_20963	0	4	1
SAMPLE_20964	14	19	6
SAMPLE_20965	8	21	0
SAMPLE_22	4	5	2
SAMPLE_25	2	5	1
SAMPLE_20966	0	3	0
SAMPLE_28	6	15	0
SAMPLE_20967	2	7	0
SAMPLE_31	2	3	1
SAMPLE_34	3	4	0
SAMPLE_37	10	12	2
SAMPLE_20968	7	25	1
SAMPLE_20969	7	16	2
SAMPLE_20970	4	3	0
SAMPLE_20971	2	7	0
SAMPLE_20972	17	26	3
SAMPLE_40	25	29	2
SAMPLE_20973	13	24	2
SAMPLE_20974	5	11	1
SAMPLE_20975	5	6	1
SAMPLE_20976	3	10	2
SAMPLE_43	4	13	1
SAMPLE_6723	8	11	0
SAMPLE_6167	10	18	2
SAMPLE_6168	7	16	1
SAMPLE_20977	0	3	1
SAMPLE_20978	5	9	2
SAMPLE_20979	10	22	1
SAMPLE_20980	1	6	1
SAMPLE_46	8	15	0
SAMPLE_20981	6	10	3
SAMPLE_4833	8	16	4
SAMPLE_20982	2	6	0
SAMPLE_49	11	14	2
SAMPLE_20983	3	7	0
SAMPLE_20984	1	7	1
SAMPLE_11574	9	18	1
SAMPLE_602	2	6	1
SAMPLE_599	13	12	3
SAMPLE_20985	2	5	1
SAMPLE_52	6	12	1
SAMPLE_55	5	14	2
SAMPLE_20986	8	10	1
SAMPLE_58	2	6	3
SAMPLE_20987	8	19	4
SAMPLE_20988	4	4	2
SAMPLE_20989	5	7	2
SAMPLE_61	3	8	2
SAMPLE_5984	3	12	2
SAMPLE_64	7	17	2
SAMPLE_67	7	12	0
SAMPLE_70	6	11	1
SAMPLE_20990	8	7	3
SAMPLE_73	5	8	4
SAMPLE_76	4	10	0
SAMPLE_79	2	7	0
SAMPLE_20991	6	14	3
SAMPLE_17096	3	6	4
SAMPLE_20992	2	7	0
SAMPLE_20993	3	6	2
SAMPLE_20994	17	24	7
SAMPLE_20995	1	6	2
SAMPLE_20996	5	6	3
SAMPLE_82	5	10	1
SAMPLE_20997	4	4	3
SAMPLE_20998	5	8	1
SAMPLE_20999	10	11	1
SAMPLE_21000	3	6	3
SAMPLE_85	3	10	1
SAMPLE_88	0	5	1
SAMPLE_91	1	4	4
SAMPLE_1065	1	2	0
SAMPLE_94	0	0	0
SAMPLE_1064	1	4	1
SAMPLE_33	2	2	1
SAMPLE_32	3	3	2
SAMPLE_21001	3	9	0
SAMPLE_5903	8	16	1
SAMPLE_5904	8	12	0
SAMPLE_97	10	8	1
SAMPLE_21002	6	3	1
SAMPLE_21003	4	10	0
SAMPLE_100	4	7	3
SAMPLE_103	2	12	2
SAMPLE_21004	2	9	1
SAMPLE_106	6	13	1
SAMPLE_109	1	5	1
SAMPLE_752	5	5	1
SAMPLE_753	1	11	0
SAMPLE_112	1	8	4
SAMPLE_21005	2	4	1
SAMPLE_21006	3	7	1
SAMPLE_21007	2	14	2
SAMPLE_115	3	9	2
SAMPLE_240	0	8	1
SAMPLE_239	1	6	1
SAMPLE_118	8	17	2
SAMPLE_21008	3	8	1
SAMPLE_121	6	9	2
SAMPLE_1875	6	10	3
SAMPLE_21009	6	16	2
SAMPLE_1874	3	2	2
SAMPLE_21010	7	11	4
SAMPLE_8627	22	22	4
SAMPLE_8628	4	10	3
SAMPLE_21011	2	16	0
SAMPLE_124	4	8	0
SAMPLE_21012	4	19	1
SAMPLE_127	4	8	1
SAMPLE_130	5	11	0
SAMPLE_133	14	23	3
SAMPLE_21013	2	10	0
SAMPLE_136	4	16	0
SAMPLE_139	8	13	1
SAMPLE_21014	3	14	2
SAMPLE_21015	6	10	0
SAMPLE_21016	7	13	2
SAMPLE_93	3	8	3
SAMPLE_21017	3	10	0
SAMPLE_3681	3	6	4
SAMPLE_3680	3	5	1
SAMPLE_21018	4	3	1
SAMPLE_142	7	7	0
SAMPLE_21019	3	6	0
SAMPLE_145	13	23	1
SAMPLE_21020	2	12	1
SAMPLE_21021	2	5	5
SAMPLE_21022	4	10	1
SAMPLE_21023	4	10	0
SAMPLE_21024	5	9	2
SAMPLE_148	3	11	2
SAMPLE_151	5	4	1
SAMPLE_21025	0	4	1
SAMPLE_154	2	5	1
SAMPLE_447	3	8	3
SAMPLE_21026	3	9	4
SAMPLE_157	11	12	2
SAMPLE_21027	5	16	0
SAMPLE_21028	6	12	6
SAMPLE_21029	2	12	1
SAMPLE_21030	4	11	1
SAMPLE_138	5	16	1
SAMPLE_160	0	5	0
SAMPLE_21031	5	6	2
SAMPLE_21032	1	8	1
SAMPLE_21033	4	7	1
SAMPLE_21034	2	7	0
SAMPLE_21035	7	17	0
SAMPLE_163	11	8	2
SAMPLE_21036	7	10	2
SAMPLE_166	3	10	3
SAMPLE_21037	3	5	2
SAMPLE_169	2	8	0
SAMPLE_172	7	9	1
SAMPLE_21038	2	16	2
SAMPLE_21039	1	7	0
SAMPLE_248	1	4	3
SAMPLE_249	1	3	1
SAMPLE_846	1	4	4
SAMPLE_582	1	2	2
SAMPLE_581	5	6	0
SAMPLE_21040	8	17	2
SAMPLE_21041	6	9	2
SAMPLE_153	1	5	0
SAMPLE_152	4	9	2
SAMPLE_21042	4	13	0
SAMPLE_21043	3	4	5
SAMPLE_175	13	17	2
SAMPLE_102	5	7	2
SAMPLE_101	0	5	1
SAMPLE_178	3	8	5
SAMPLE_181	2	6	1
SAMPLE_21044	1	5	2
SAMPLE_21045	2	3	2
SAMPLE_21046	6	11	0
SAMPLE_21047	5	3	1
SAMPLE_170	4	6	1
SAMPLE_171	1	8	0
SAMPLE_184	2	4	0
SAMPLE_21048	2	13	1
SAMPLE_21049	1	4	4
SAMPLE_21050	4	9	1
SAMPLE_187	15	16	3
SAMPLE_21051	6	11	6
SAMPLE_21052	6	3	0
SAMPLE_21053	4	7	0
SAMPLE_21054	8	7	3
SAMPLE_21055	8	11	1
SAMPLE_190	1	6	2
SAMPLE_21056	3	5	0
SAMPLE_193	3	6	0
SAMPLE_196	11	13	2
SAMPLE_21057	8	7	1
SAMPLE_21058	7	3	1
SAMPLE_21059	5	4	2
SAMPLE_199	1	7	1
SAMPLE_202	12	7	0
SAMPLE_205	3	5	1
SAMPLE_21060	2	11	1
SAMPLE_21061	1	1	0
SAMPLE_2370	1	3	2
SAMPLE_2369	4	10	2
SAMPLE_208	4	15	2
SAMPLE_211	6	9	1
SAMPLE_214	8	14	2
SAMPLE_21062	7	8	1
SAMPLE_21063	1	6	0
SAMPLE_217	5	13	1
SAMPLE_21064	5	12	0
SAMPLE_21065	3	16	1
SAMPLE_220	3	9	1
SAMPLE_223	4	4	0
SAMPLE_21066	5	13	1
SAMPLE_176	6	15	1
SAMPLE_177	10	15	3
SAMPLE_182	3	11	3
SAMPLE_183	2	6	2
SAMPLE_21067	4	10	0
SAMPLE_21068	9	15	0
SAMPLE_226	5	9	0
SAMPLE_229	2	5	3
SAMPLE_232	2	2	0
SAMPLE_2325	4	8	0
SAMPLE_235	5	13	0
SAMPLE_238	1	11	2
SAMPLE_21069	9	16	1
SAMPLE_21070	6	6	0
SAMPLE_241	2	8	2
SAMPLE_21071	4	11	0
SAMPLE_21072	6	11	2
SAMPLE_246	5	14	2
SAMPLE_245	5	5	2
SAMPLE_244	4	8	2
SAMPLE_21073	7	13	2
SAMPLE_247	0	7	1
SAMPLE_21074	3	12	1
SAMPLE_747	0	6	2
SAMPLE_746	4	12	4
SAMPLE_13646	5	6	2
SAMPLE_250	4	4	0
SAMPLE_21075	8	10	2
SAMPLE_13647	6	6	1
SAMPLE_21076	1	5	0
SAMPLE_253	4	19	0
SAMPLE_21077	6	11	0
SAMPLE_256	6	7	2
SAMPLE_21078	10	11	2
SAMPLE_219	3	6	1
SAMPLE_218	3	11	0
SAMPLE_259	2	9	0
SAMPLE_186	2	0	0
SAMPLE_185	4	4	0
SAMPLE_18185	8	11	2
SAMPLE_21079	5	8	3
SAMPLE_21080	4	16	0
SAMPLE_262	1	4	0
SAMPLE_225	3	8	0
SAMPLE_224	0	8	1
SAMPLE_21081	3	11	0
SAMPLE_2738	4	8	1
SAMPLE_2739	1	9	2
SAMPLE_21082	8	13	3
SAMPLE_265	5	7	3
SAMPLE_21083	5	9	1
SAMPLE_268	6	10	1
SAMPLE_234	4	14	1
SAMPLE_233	4	15	4
SAMPLE_21084	19	25	3
SAMPLE_21085	2	7	2
SAMPLE_21086	3	12	0
SAMPLE_21087	5	12	4
SAMPLE_271	1	7	2
SAMPLE_21088	0	5	1
SAMPLE_21089	9	17	3
SAMPLE_21090	13	21	3
SAMPLE_276	4	4	3
SAMPLE_274	1	4	4
SAMPLE_277	9	15	2
SAMPLE_275	2	4	2
SAMPLE_21091	2	4	3
SAMPLE_280	7	18	1
SAMPLE_227	4	10	0
SAMPLE_228	4	10	0
SAMPLE_21092	3	11	1
SAMPLE_285	3	9	2
SAMPLE_283	0	3	1
SAMPLE_21093	3	11	1
SAMPLE_21094	12	9	3
SAMPLE_21095	2	12	0
SAMPLE_21096	8	12	1
SAMPLE_21097	7	12	2
SAMPLE_284	1	5	2
SAMPLE_286	9	16	1
SAMPLE_289	1	6	2
SAMPLE_292	14	23	4
SAMPLE_21098	5	7	1
SAMPLE_295	3	6	1
SAMPLE_298	5	9	0
SAMPLE_668	3	9	4
SAMPLE_669	5	8	3
SAMPLE_21099	15	14	1
SAMPLE_301	3	4	0
SAMPLE_7232	8	9	0
SAMPLE_304	2	9	1
SAMPLE_21100	5	6	0
SAMPLE_21101	5	17	1
SAMPLE_307	5	15	2
SAMPLE_927	4	13	3
SAMPLE_926	1	9	3
SAMPLE_21102	2	4	1
SAMPLE_21103	7	13	1
SAMPLE_21104	1	3	2
SAMPLE_1715	1	4	1
SAMPLE_1716	5	4	0
SAMPLE_21105	4	9	2
SAMPLE_21106	8	11	3
SAMPLE_310	3	7	1
SAMPLE_21107	6	8	0
SAMPLE_313	3	5	4
SAMPLE_21108	4	4	2
SAMPLE_278	8	5	3
SAMPLE_279	8	6	2
SAMPLE_21109	8	21	3
SAMPLE_21110	4	11	2
SAMPLE_21111	2	5	1
SAMPLE_21112	10	15	5
SAMPLE_21113	5	9	1
SAMPLE_316	0	2	1
SAMPLE_319	32	44	3
SAMPLE_21114	9	12	2
SAMPLE_99	4	14	1
SAMPLE_98	8	2	3
SAMPLE_21115	6	8	1
SAMPLE_21116	4	5	1
SAMPLE_322	4	11	1
SAMPLE_21117	3	6	2
SAMPLE_330	2	7	1
SAMPLE_21118	6	8	1
SAMPLE_21119	4	8	0
SAMPLE_325	14	8	0
SAMPLE_21120	12	24	2
SAMPLE_21121	7	10	2
SAMPLE_21122	9	8	1
SAMPLE_21123	5	4	0
SAMPLE_329	0	6	1
SAMPLE_328	3	6	1
SAMPLE_264	3	5	0
SAMPLE_263	1	7	2
SAMPLE_21124	6	7	0
SAMPLE_21125	8	13	1
SAMPLE_21126	0	5	0
SAMPLE_21127	2	5	1
SAMPLE_21128	6	17	4
SAMPLE_305	4	9	0
SAMPLE_21129	3	10	3
SAMPLE_333	9	8	1
SAMPLE_332	1	6	1
SAMPLE_331	4	6	1
SAMPLE_306	5	5	2
SAMPLE_312	2	9	0
SAMPLE_311	4	10	0
SAMPLE_334	9	8	0
SAMPLE_337	7	17	2
SAMPLE_21130	3	9	1
SAMPLE_341	2	7	0
SAMPLE_340	3	12	0
SAMPLE_342	5	10	0
SAMPLE_343	5	5	1
SAMPLE_346	8	15	2
SAMPLE_21131	7	18	0
SAMPLE_349	1	9	3
SAMPLE_352	18	31	4
SAMPLE_21132	4	10	0
SAMPLE_21133	0	7	1
SAMPLE_21134	9	11	0
SAMPLE_21135	3	10	0
SAMPLE_21136	15	21	1
SAMPLE_21137	9	15	5
SAMPLE_355	3	4	1
SAMPLE_12146	5	9	0
SAMPLE_12147	9	15	3
SAMPLE_358	4	6	1
SAMPLE_361	4	7	1
SAMPLE_21138	3	10	0
SAMPLE_21139	7	16	0
SAMPLE_21140	0	10	0
SAMPLE_21141	9	15	1
SAMPLE_21142	6	14	3
SAMPLE_20	4	3	0
SAMPLE_21	3	5	1
SAMPLE_21143	2	8	3
SAMPLE_364	3	12	2
SAMPLE_21144	7	7	2
SAMPLE_21145	0	5	2
SAMPLE_367	12	15	3
SAMPLE_21146	6	6	0
SAMPLE_370	6	12	0
SAMPLE_21147	21	35	4
SAMPLE_21148	5	9	2
SAMPLE_21149	26	41	3
SAMPLE_21150	3	14	1
SAMPLE_21151	9	12	4
SAMPLE_21152	9	12	0
SAMPLE_21153	4	7	1
SAMPLE_373	10	10	1
SAMPLE_376	11	14	3
SAMPLE_21154	7	13	2
SAMPLE_379	16	25	3
SAMPLE_21155	4	5	1
SAMPLE_16439	5	6	1
SAMPLE_385	0	4	0
SAMPLE_382	4	9	0
SAMPLE_20576	9	10	2
SAMPLE_20577	4	10	0
SAMPLE_388	3	7	3
SAMPLE_1548	1	6	1
SAMPLE_21156	8	13	0
SAMPLE_391	6	9	0
SAMPLE_393	5	3	0
SAMPLE_392	4	13	0
SAMPLE_21157	3	3	1
SAMPLE_21158	21	26	2
SAMPLE_21159	26	28	3
SAMPLE_394	4	3	2
SAMPLE_21160	2	5	2
SAMPLE_1317	0	4	2
SAMPLE_1316	5	4	0
SAMPLE_21161	4	11	1
SAMPLE_397	1	4	1
SAMPLE_21162	4	10	2
SAMPLE_400	6	9	1
SAMPLE_21163	8	12	1
SAMPLE_21164	5	10	2
SAMPLE_403	12	13	2
SAMPLE_21165	2	11	2
SAMPLE_406	7	9	1
SAMPLE_409	9	21	2
SAMPLE_21166	4	11	1
SAMPLE_412	5	10	3
SAMPLE_327	11	16	1
SAMPLE_326	10	8	1
SAMPLE_415	11	13	2
SAMPLE_418	3	4	2
SAMPLE_421	1	10	2
SAMPLE_21167	7	14	1
SAMPLE_21168	7	11	2
SAMPLE_21169	5	11	3
SAMPLE_21170	23	28	6
SAMPLE_21171	5	7	3
SAMPLE_21172	6	15	0
SAMPLE_424	11	12	4
SAMPLE_427	2	4	0
SAMPLE_21173	7	15	3
SAMPLE_430	8	9	1
SAMPLE_21174	3	6	1
SAMPLE_21175	17	15	3
SAMPLE_21176	8	13	1
SAMPLE_21177	5	9	4
SAMPLE_21178	4	5	2
SAMPLE_6474	20	24	2
SAMPLE_6473	16	23	4
SAMPLE_433	1	2	1
SAMPLE_21179	6	10	2
SAMPLE_436	4	6	1
SAMPLE_242	0	6	2
SAMPLE_6114	11	14	3
SAMPLE_439	3	11	2
SAMPLE_442	2	10	2
SAMPLE_21180	4	7	1
SAMPLE_21181	4	12	1
SAMPLE_456	4	16	0
SAMPLE_455	4	7	0
SAMPLE_445	2	10	6
SAMPLE_448	3	18	1
SAMPLE_21182	10	10	1
SAMPLE_451	4	4	1
SAMPLE_454	8	12	1
SAMPLE_21183	2	6	2
SAMPLE_457	9	24	3
SAMPLE_200	9	4	1
SAMPLE_21184	9	6	3
SAMPLE_21185	6	9	0
SAMPLE_460	7	11	3
SAMPLE_21186	11	20	1
SAMPLE_463	11	13	1
SAMPLE_497	1	4	2
SAMPLE_813	12	16	5
SAMPLE_21187	1	2	4
SAMPLE_466	5	11	0
SAMPLE_17598	4	16	2
SAMPLE_17597	5	6	0
SAMPLE_469	3	11	1
SAMPLE_472	6	11	0
SAMPLE_475	3	5	4
SAMPLE_478	8	10	0
SAMPLE_21188	2	5	1
SAMPLE_481	5	5	1
SAMPLE_21189	4	12	0
SAMPLE_21190	5	6	0
SAMPLE_461	3	9	2
SAMPLE_462	3	8	1
SAMPLE_484	10	11	1
SAMPLE_488	9	17	1
SAMPLE_489	11	19	1
SAMPLE_487	8	18	1
SAMPLE_490	5	12	4
SAMPLE_493	7	5	0
SAMPLE_496	1	7	0
SAMPLE_21191	5	20	1
SAMPLE_499	5	9	2
SAMPLE_9095	5	17	1
SAMPLE_21192	4	13	1
SAMPLE_530	5	7	1
SAMPLE_531	2	17	1
SAMPLE_21193	9	8	1
SAMPLE_21194	2	7	2
SAMPLE_502	12	11	3
SAMPLE_21195	6	20	1
SAMPLE_505	3	8	2
SAMPLE_506	3	7	2
SAMPLE_507	1	4	1
SAMPLE_21196	3	9	1
SAMPLE_21197	1	2	4
SAMPLE_508	4	9	1
SAMPLE_21198	1	8	2
SAMPLE_21199	3	10	3
SAMPLE_21200	10	12	1
SAMPLE_18243	8	18	4
SAMPLE_511	3	5	1
SAMPLE_514	4	4	0
SAMPLE_517	3	16	0
SAMPLE_14486	4	15	0
SAMPLE_14487	2	7	0
SAMPLE_520	3	10	1
SAMPLE_523	2	8	2
SAMPLE_526	2	6	1
SAMPLE_21201	10	21	2
SAMPLE_302	5	9	3
SAMPLE_21202	2	5	2
SAMPLE_351	7	5	1
SAMPLE_21203	5	3	0
SAMPLE_21204	30	47	9
SAMPLE_21205	12	12	4
SAMPLE_21206	5	10	1
SAMPLE_21207	11	21	3
SAMPLE_529	2	8	3
SAMPLE_532	3	6	3
SAMPLE_535	7	10	3
SAMPLE_21208	2	5	1
SAMPLE_538	2	7	2
SAMPLE_21209	11	18	4
SAMPLE_541	2	5	1
SAMPLE_544	2	7	1
SAMPLE_21210	3	12	0
SAMPLE_547	12	27	4
SAMPLE_550	7	8	0
SAMPLE_21211	7	9	0
SAMPLE_21212	8	13	0
SAMPLE_21213	6	9	1
SAMPLE_553	7	8	1
SAMPLE_556	5	10	4
SAMPLE_21214	9	15	0
SAMPLE_21215	4	8	3
SAMPLE_21216	5	9	2
SAMPLE_559	6	14	3
SAMPLE_21217	5	8	3
SAMPLE_21218	3	4	0
SAMPLE_21219	4	12	1
SAMPLE_21220	10	11	0
SAMPLE_21221	12	15	4
SAMPLE_562	8	8	1
SAMPLE_21222	2	11	5
SAMPLE_565	0	1	1
SAMPLE_516	3	4	0
SAMPLE_429	1	4	0
SAMPLE_428	2	3	1
SAMPLE_21223	7	17	0
SAMPLE_515	3	9	1
SAMPLE_568	4	6	0
SAMPLE_201	6	7	2
SAMPLE_21224	4	6	8
SAMPLE_571	7	12	1
SAMPLE_273	7	9	1
SAMPLE_21225	4	7	1
SAMPLE_21226	3	3	0
SAMPLE_272	3	9	4
SAMPLE_21227	1	4	2
SAMPLE_21228	9	16	3
SAMPLE_574	4	10	0
SAMPLE_21229	4	3	3
SAMPLE_21230	12	4	0
SAMPLE_21231	2	9	0
SAMPLE_293	10	17	2
SAMPLE_294	7	15	0
SAMPLE_577	5	5	4
SAMPLE_21232	4	9	0
SAMPLE_580	4	2	1
SAMPLE_583	2	4	2
SAMPLE_586	7	8	1
SAMPLE_21233	2	7	1
SAMPLE_589	1	4	0
SAMPLE_21234	3	9	2
SAMPLE_21235	1	3	0
SAMPLE_592	1	9	1
SAMPLE_595	2	6	3
SAMPLE_21236	9	15	0
SAMPLE_21237	14	19	4
SAMPLE_601	4	11	2
SAMPLE_598	10	12	1
SAMPLE_21238	8	10	2
SAMPLE_21239	15	17	2
SAMPLE_569	5	8	0
SAMPLE_570	3	2	0
SAMPLE_607	1	6	0
SAMPLE_604	6	14	0
SAMPLE_21240	12	22	3
SAMPLE_21241	8	16	3
SAMPLE_21242	2	4	2
SAMPLE_21243	5	12	1
SAMPLE_941	1	5	1
SAMPLE_942	5	6	2
SAMPLE_548	14	17	2
SAMPLE_549	14	22	3
SAMPLE_610	6	5	1
SAMPLE_613	4	3	2
SAMPLE_21244	6	12	2
SAMPLE_21245	7	15	3
SAMPLE_21246	7	10	1
SAMPLE_21247	10	16	1
SAMPLE_21248	10	9	2
SAMPLE_616	12	3	4
SAMPLE_21249	8	9	2
SAMPLE_21250	4	4	0
SAMPLE_21251	8	13	2
SAMPLE_21252	4	6	2
SAMPLE_619	2	8	1
SAMPLE_575	3	8	2
SAMPLE_576	3	4	0
SAMPLE_18834	6	15	1
SAMPLE_21253	4	3	2
SAMPLE_21254	4	5	0
SAMPLE_622	1	7	2
SAMPLE_21255	3	4	4
SAMPLE_21256	11	12	1
SAMPLE_21257	4	8	1
SAMPLE_21258	4	4	0
SAMPLE_625	7	13	0
SAMPLE_21259	3	9	2
SAMPLE_21260	6	19	3
SAMPLE_628	0	6	1
SAMPLE_630	0	4	2
SAMPLE_21261	3	6	2
SAMPLE_21262	5	9	3
SAMPLE_21263	9	16	1
SAMPLE_21264	5	8	2
SAMPLE_629	2	10	2
SAMPLE_21265	12	17	3
SAMPLE_5799	2	7	0
SAMPLE_5798	5	2	1
SAMPLE_631	4	11	1
SAMPLE_634	3	5	3
SAMPLE_637	0	1	1
SAMPLE_639	0	3	4
SAMPLE_638	2	5	3
SAMPLE_21266	0	5	2
SAMPLE_621	1	6	1
SAMPLE_21267	5	6	1
SAMPLE_640	2	16	2
SAMPLE_141	1	7	0
SAMPLE_140	8	17	2
SAMPLE_21268	1	6	1
SAMPLE_21269	4	5	0
SAMPLE_643	5	11	1
SAMPLE_21270	1	7	2
SAMPLE_646	7	7	1
SAMPLE_21271	19	31	3
SAMPLE_21272	7	10	2
SAMPLE_649	3	9	1
SAMPLE_5501	6	9	0
SAMPLE_5502	5	8	1
SAMPLE_652	10	16	1
SAMPLE_653	10	18	2
SAMPLE_654	16	19	1
SAMPLE_655	1	6	1
SAMPLE_21273	6	10	0
SAMPLE_658	3	8	2
SAMPLE_661	8	16	1
SAMPLE_960	6	10	0
SAMPLE_664	4	1	0
SAMPLE_21274	2	3	0
SAMPLE_17244	6	3	2
SAMPLE_588	5	9	1
SAMPLE_587	1	6	3
SAMPLE_667	2	9	5
SAMPLE_21275	15	29	2
SAMPLE_670	3	10	4
SAMPLE_18833	6	16	0
SAMPLE_3173	1	5	2
SAMPLE_3174	1	8	2
SAMPLE_620	4	14	1
SAMPLE_21276	4	8	0
SAMPLE_673	4	16	3
SAMPLE_678	4	12	2
SAMPLE_676	3	8	1
SAMPLE_677	8	7	2
SAMPLE_21277	6	11	1
SAMPLE_679	1	1	0
SAMPLE_682	0	4	1
SAMPLE_685	1	12	3
SAMPLE_688	4	13	3
SAMPLE_21278	8	12	0
SAMPLE_691	5	16	3
SAMPLE_21279	2	10	1
SAMPLE_21280	1	5	0
SAMPLE_21281	4	7	2
SAMPLE_21282	5	9	0
SAMPLE_5129	3	6	2
SAMPLE_5130	12	11	1
SAMPLE_694	1	6	0
SAMPLE_697	2	2	1
SAMPLE_21283	7	5	1
SAMPLE_21284	6	7	1
SAMPLE_21285	3	5	1
SAMPLE_21286	6	6	0
SAMPLE_21287	8	9	1
SAMPLE_21288	14	33	1
SAMPLE_21289	3	9	0
SAMPLE_700	6	11	0
SAMPLE_703	1	3	1
SAMPLE_21290	6	12	2
SAMPLE_21291	7	18	2
SAMPLE_21292	5	14	2
SAMPLE_21293	17	14	0
SAMPLE_706	5	8	2
SAMPLE_708	1	6	2
SAMPLE_707	13	18	1
SAMPLE_21294	8	6	3
SAMPLE_21295	8	11	1
SAMPLE_709	6	12	2
SAMPLE_21296	9	20	3
SAMPLE_21297	9	17	4
SAMPLE_712	4	6	2
SAMPLE_21298	1	1	1
SAMPLE_75	7	11	2
SAMPLE_74	5	9	0
SAMPLE_683	1	10	2
SAMPLE_684	2	6	0
SAMPLE_767	6	19	4
SAMPLE_715	5	5	0
SAMPLE_21299	9	23	3
SAMPLE_718	8	17	1
SAMPLE_721	18	25	3
SAMPLE_21300	4	7	0
SAMPLE_21301	10	21	1
SAMPLE_21302	12	15	1
SAMPLE_3573	3	6	2
SAMPLE_693	6	17	2
SAMPLE_21303	9	15	2
SAMPLE_21304	24	21	3
SAMPLE_724	2	8	2
SAMPLE_21305	7	15	3
SAMPLE_21306	1	6	0
SAMPLE_727	3	7	1
SAMPLE_21307	4	10	0
SAMPLE_21308	3	8	2
SAMPLE_15473	6	17	0
SAMPLE_730	14	15	5
SAMPLE_733	3	7	2
SAMPLE_736	2	8	0
SAMPLE_21309	2	6	0
SAMPLE_739	5	11	4
SAMPLE_635	3	8	6
SAMPLE_636	1	6	3
SAMPLE_743	0	6	2
SAMPLE_742	1	5	3
SAMPLE_745	4	13	1
SAMPLE_21310	15	29	5
SAMPLE_21311	3	5	1
SAMPLE_608	7	10	0
SAMPLE_605	9	13	0
SAMPLE_609	4	14	0
SAMPLE_606	5	16	0
SAMPLE_21312	9	14	3
SAMPLE_748	1	6	0
SAMPLE_751	4	6	0
SAMPLE_744	0	2	0
SAMPLE_719	9	14	1
SAMPLE_754	13	10	1
SAMPLE_720	10	13	1
SAMPLE_21313	6	18	3
SAMPLE_21314	10	14	0
SAMPLE_757	4	5	0
SAMPLE_760	2	6	1
SAMPLE_21315	2	7	1
SAMPLE_21316	0	1	0
SAMPLE_21317	2	7	2
SAMPLE_21318	5	11	1
SAMPLE_763	5	4	2
SAMPLE_766	5	13	1
SAMPLE_21319	6	8	1
SAMPLE_854	5	13	2
SAMPLE_21320	7	15	2
SAMPLE_21321	4	10	2
SAMPLE_21322	0	5	1
SAMPLE_769	2	4	2
SAMPLE_21323	3	11	1
SAMPLE_772	13	21	3
SAMPLE_21324	5	9	1
SAMPLE_21325	3	8	2
SAMPLE_21326	5	9	2
SAMPLE_775	6	14	1
SAMPLE_545	1	6	1
SAMPLE_546	2	6	1
SAMPLE_21327	8	13	0
SAMPLE_21328	16	21	5
SAMPLE_309	5	11	2
SAMPLE_308	6	9	0
SAMPLE_778	8	12	2
SAMPLE_784	3	7	1
SAMPLE_781	13	19	0
SAMPLE_782	14	21	0
SAMPLE_783	13	15	1
SAMPLE_21329	2	10	0
SAMPLE_21330	4	12	1
SAMPLE_787	6	5	0
SAMPLE_790	29	20	0
SAMPLE_21331	5	8	1
SAMPLE_21332	1	4	0
SAMPLE_21333	4	18	1
SAMPLE_793	2	6	2
SAMPLE_796	6	8	2
SAMPLE_21334	2	11	3
SAMPLE_2220	1	6	2
SAMPLE_2219	1	6	3
SAMPLE_21335	3	4	1
SAMPLE_692	10	13	0
SAMPLE_21336	5	5	2
SAMPLE_21337	9	22	6
SAMPLE_212	8	10	1
SAMPLE_21338	4	11	2
SAMPLE_799	7	12	2
SAMPLE_21339	8	2	0
SAMPLE_802	4	15	1
SAMPLE_10272	7	15	1
SAMPLE_10271	15	22	4
SAMPLE_21340	6	11	1
SAMPLE_21341	6	6	2
SAMPLE_805	2	5	2
SAMPLE_21342	6	13	2
SAMPLE_623	1	4	1
SAMPLE_624	3	6	2
SAMPLE_21343	5	8	2
SAMPLE_808	3	14	6
SAMPLE_811	2	6	3
SAMPLE_21344	9	12	3
SAMPLE_814	0	7	0
SAMPLE_817	23	34	7
SAMPLE_820	1	9	3
SAMPLE_21345	2	6	2
SAMPLE_823	4	18	1
SAMPLE_21346	12	11	0
SAMPLE_21347	8	16	0
SAMPLE_21348	1	5	1
SAMPLE_826	1	10	0
SAMPLE_21349	1	6	0
SAMPLE_21350	6	14	2
SAMPLE_829	2	2	0
SAMPLE_832	4	9	1
SAMPLE_21351	2	9	1
SAMPLE_21352	10	8	0
SAMPLE_835	3	3	1
SAMPLE_839	4	4	2
SAMPLE_840	0	3	1
SAMPLE_838	4	6	0
SAMPLE_841	0	6	1
SAMPLE_21353	8	19	1
SAMPLE_21354	5	6	2
SAMPLE_21355	4	6	3
SAMPLE_21356	9	13	1
SAMPLE_17015	6	9	0
SAMPLE_17016	6	15	2
SAMPLE_350	4	11	1
SAMPLE_2171	2	7	0
SAMPLE_21357	4	14	0
SAMPLE_844	4	7	3
SAMPLE_21358	12	12	0
SAMPLE_21359	13	23	3
SAMPLE_21360	7	14	2
SAMPLE_847	13	15	1
SAMPLE_21361	3	4	3
SAMPLE_21362	11	9	2
SAMPLE_850	9	7	2
SAMPLE_853	4	4	1
SAMPLE_21363	11	12	1
SAMPLE_856	5	12	0
SAMPLE_859	8	9	1
SAMPLE_21364	5	12	0
SAMPLE_21365	14	24	4
SAMPLE_862	4	8	1
SAMPLE_21366	7	19	0
SAMPLE_865	11	16	4
SAMPLE_537	3	7	1
SAMPLE_536	5	5	3
SAMPLE_794	7	10	1
SAMPLE_203	7	11	0
SAMPLE_204	8	4	0
SAMPLE_795	6	13	4
SAMPLE_21367	4	7	0
SAMPLE_21368	6	5	1
SAMPLE_21369	12	11	1
SAMPLE_6140	7	9	0
SAMPLE_789	9	11	2
SAMPLE_788	4	4	2
SAMPLE_21370	3	12	5
SAMPLE_21371	1	4	3
SAMPLE_21372	9	19	2
SAMPLE_21373	12	6	1
SAMPLE_6141	9	7	0
SAMPLE_21374	3	4	3
SAMPLE_868	6	16	4
SAMPLE_871	1	4	3
SAMPLE_21375	3	6	1
SAMPLE_15062	2	8	1
SAMPLE_15063	2	7	0
SAMPLE_21376	7	7	0
SAMPLE_21377	0	5	0
SAMPLE_257	9	11	2
SAMPLE_258	8	14	2
SAMPLE_19922	6	19	4
SAMPLE_874	8	11	2
SAMPLE_21378	1	9	3
SAMPLE_877	2	7	1
SAMPLE_880	0	3	2
SAMPLE_432	7	12	1
SAMPLE_21379	2	4	2
SAMPLE_21380	5	6	2
SAMPLE_21381	2	6	0
SAMPLE_21382	14	16	2
SAMPLE_21383	21	30	1
SAMPLE_883	9	10	1
SAMPLE_21384	7	4	6
SAMPLE_21385	12	16	2
SAMPLE_886	1	8	1
SAMPLE_889	6	14	2
SAMPLE_900	2	5	0
SAMPLE_21386	3	6	1
SAMPLE_21387	5	8	4
SAMPLE_894	2	15	1
SAMPLE_893	13	10	3
SAMPLE_892	5	16	1
SAMPLE_21388	4	8	0
SAMPLE_21389	5	9	1
SAMPLE_21390	5	13	0
SAMPLE_890	2	18	3
SAMPLE_891	5	14	4
SAMPLE_895	10	14	1
SAMPLE_898	2	8	1
SAMPLE_899	3	4	0
SAMPLE_901	5	9	0
SAMPLE_21391	2	4	0
SAMPLE_21392	21	28	3
SAMPLE_21393	8	17	0
SAMPLE_21394	7	6	0
SAMPLE_21395	1	14	3
SAMPLE_21396	8	11	1
SAMPLE_395	1	7	2
SAMPLE_396	2	5	1
SAMPLE_21397	13	15	1
SAMPLE_21398	5	6	0
SAMPLE_904	7	14	0
SAMPLE_906	11	16	2
SAMPLE_905	5	9	1
SAMPLE_21399	10	14	2
SAMPLE_21400	4	11	0
SAMPLE_1424	3	8	3
SAMPLE_1425	6	7	2
SAMPLE_907	7	11	0
SAMPLE_147	12	20	1
SAMPLE_146	10	11	0
SAMPLE_21401	3	9	1
SAMPLE_884	8	5	2
SAMPLE_885	5	8	0
SAMPLE_21402	3	14	0
SAMPLE_1703	4	10	2
SAMPLE_21403	7	17	0
SAMPLE_1571	3	10	0
SAMPLE_910	7	18	2
SAMPLE_14307	5	10	0
SAMPLE_14306	3	4	0
SAMPLE_21404	3	10	2
SAMPLE_21405	4	4	0
SAMPLE_21406	3	9	2
SAMPLE_17243	6	10	0
SAMPLE_10986	6	8	4
SAMPLE_10985	4	7	0
SAMPLE_21407	2	6	2
SAMPLE_21408	2	10	1
SAMPLE_21409	0	8	3
SAMPLE_913	9	15	1
SAMPLE_918	9	15	2
SAMPLE_21410	4	5	1
SAMPLE_917	6	15	2
SAMPLE_916	10	10	3
SAMPLE_921	2	7	0
SAMPLE_919	2	6	3
SAMPLE_920	4	9	4
SAMPLE_922	3	8	4
SAMPLE_925	2	3	1
SAMPLE_928	4	7	1
SAMPLE_21411	4	4	2
SAMPLE_932	2	6	2
SAMPLE_931	2	7	1
SAMPLE_933	2	10	0
SAMPLE_21412	5	7	1
SAMPLE_21413	1	8	0
SAMPLE_934	2	6	1
SAMPLE_21414	4	9	1
SAMPLE_21415	0	7	1
SAMPLE_21416	2	5	1
SAMPLE_21417	9	6	0
SAMPLE_21418	3	3	0
SAMPLE_21419	7	8	3
SAMPLE_5145	3	8	0
SAMPLE_5144	4	13	1
SAMPLE_21420	4	21	0
SAMPLE_21421	1	7	1
SAMPLE_21422	1	5	4
SAMPLE_937	5	8	2
SAMPLE_940	2	7	1
SAMPLE_943	2	6	1
SAMPLE_13217	7	16	1
SAMPLE_21423	4	7	1
SAMPLE_21424	3	7	5
SAMPLE_946	11	9	1
SAMPLE_947	6	7	0
SAMPLE_948	4	16	1
SAMPLE_21425	7	13	1
SAMPLE_16130	5	10	3
SAMPLE_16131	4	11	1
SAMPLE_949	9	4	3
SAMPLE_952	2	5	0
SAMPLE_21426	3	7	1
SAMPLE_955	3	6	0
SAMPLE_958	10	17	1
SAMPLE_21427	3	4	1
SAMPLE_961	6	7	2
SAMPLE_962	4	4	1
SAMPLE_963	4	9	4
SAMPLE_21428	1	4	1
SAMPLE_21429	2	11	0
SAMPLE_964	2	6	1
SAMPLE_967	3	12	0
SAMPLE_21430	6	6	1
SAMPLE_21431	2	2	3
SAMPLE_21432	11	21	1
SAMPLE_973	3	7	1
SAMPLE_970	4	7	0
SAMPLE_21433	6	12	1
SAMPLE_21434	9	4	1
SAMPLE_976	1	2	1
SAMPLE_21435	6	5	1
SAMPLE_21436	1	6	0
SAMPLE_21437	9	17	0
SAMPLE_21438	3	10	1
SAMPLE_21439	9	17	1
SAMPLE_979	2	14	3
SAMPLE_21440	6	13	1
SAMPLE_495	3	3	3
SAMPLE_494	2	5	3
SAMPLE_21441	14	18	4
SAMPLE_21442	7	9	0
SAMPLE_21443	8	12	0
SAMPLE_982	2	7	0
SAMPLE_21444	4	9	1
SAMPLE_21445	8	12	1
SAMPLE_875	4	12	1
SAMPLE_876	6	9	0
SAMPLE_1008	6	12	1
SAMPLE_1007	5	12	2
SAMPLE_985	1	9	2
SAMPLE_1179	12	17	1
SAMPLE_21446	4	20	0
SAMPLE_21447	6	6	1
SAMPLE_988	15	15	4
SAMPLE_107	2	7	1
SAMPLE_991	4	11	0
SAMPLE_21448	8	16	2
SAMPLE_108	8	14	2
SAMPLE_21449	3	3	2
SAMPLE_1178	11	11	2
SAMPLE_994	6	7	1
SAMPLE_997	1	3	1
SAMPLE_1000	4	13	0
SAMPLE_21450	4	11	1
SAMPLE_21451	3	5	0
SAMPLE_1003	0	4	0
SAMPLE_12888	6	17	4
SAMPLE_12887	1	8	0
SAMPLE_1006	7	11	5
SAMPLE_21452	7	8	1
SAMPLE_1009	1	3	0
SAMPLE_1012	0	3	1
SAMPLE_1014	3	10	2
SAMPLE_1013	1	4	3
SAMPLE_21453	1	6	1
SAMPLE_1015	5	21	0
SAMPLE_21454	4	6	0
SAMPLE_21455	13	14	0
SAMPLE_21456	2	15	3
SAMPLE_1018	6	13	2
SAMPLE_21457	7	19	2
SAMPLE_21458	12	16	3
SAMPLE_21459	4	6	2
SAMPLE_1040	3	9	0
SAMPLE_1041	4	10	0
SAMPLE_21460	1	5	1
SAMPLE_3480	2	4	2
SAMPLE_3479	1	3	3
SAMPLE_21461	2	5	1
SAMPLE_1021	2	4	1
SAMPLE_1024	2	7	1
SAMPLE_21462	6	8	0
SAMPLE_1025	0	6	0
SAMPLE_1026	1	2	1
SAMPLE_1027	2	3	1
SAMPLE_983	4	8	4
SAMPLE_21463	9	15	2
SAMPLE_9563	7	13	2
SAMPLE_9564	7	19	5
SAMPLE_1030	5	11	0
SAMPLE_21464	6	13	2
SAMPLE_18728	12	8	1
SAMPLE_18729	9	12	0
SAMPLE_1033	6	15	0
SAMPLE_21465	12	15	2
SAMPLE_21466	3	5	3
SAMPLE_21467	20	28	2
SAMPLE_21468	1	0	1
SAMPLE_1036	3	5	0
SAMPLE_21469	4	12	4
SAMPLE_21470	5	4	4
SAMPLE_21471	7	18	0
SAMPLE_21472	7	12	3
SAMPLE_21473	2	6	3
SAMPLE_21474	6	12	0
SAMPLE_8933	6	17	1
SAMPLE_8934	11	7	0
SAMPLE_1039	3	4	0
SAMPLE_1042	7	4	1
SAMPLE_18774	2	4	0
SAMPLE_18773	3	8	0
SAMPLE_21475	6	8	1
SAMPLE_938	6	9	2
SAMPLE_939	4	4	3
SAMPLE_21476	1	3	1
SAMPLE_21477	6	7	1
SAMPLE_1045	5	5	1
SAMPLE_21478	7	12	0
SAMPLE_21479	0	8	1
SAMPLE_1048	7	11	3
SAMPLE_21480	11	16	2
SAMPLE_1133	5	10	2
SAMPLE_1134	9	21	0
SAMPLE_21481	4	2	0
SAMPLE_1051	0	2	0
SAMPLE_1054	3	7	1
SAMPLE_21482	5	12	2
SAMPLE_1057	5	7	2
SAMPLE_21483	7	16	3
SAMPLE_1056	7	15	0
SAMPLE_1055	2	7	0
SAMPLE_1060	3	8	0
SAMPLE_1063	1	4	1
SAMPLE_1085	9	13	1
SAMPLE_1066	2	2	1
SAMPLE_1069	4	8	0
SAMPLE_1072	4	8	2
SAMPLE_21484	7	11	1
SAMPLE_21485	4	7	1
SAMPLE_1075	1	4	2
SAMPLE_1077	4	15	4
SAMPLE_1076	1	6	2
SAMPLE_21486	6	8	2
SAMPLE_21487	3	8	1
SAMPLE_21488	0	5	0
SAMPLE_21489	7	8	0
SAMPLE_21490	9	15	0
SAMPLE_504	11	17	1
SAMPLE_503	9	19	0
SAMPLE_21491	6	14	4
SAMPLE_21492	12	15	3
SAMPLE_21493	8	12	0
SAMPLE_957	3	4	0
SAMPLE_956	2	10	0
SAMPLE_21494	10	12	0
SAMPLE_1078	11	13	1
SAMPLE_1080	8	11	1
SAMPLE_1079	6	13	0
SAMPLE_21495	3	8	3
SAMPLE_1083	1	3	5
SAMPLE_1081	1	2	1
SAMPLE_1082	0	3	2
SAMPLE_21496	10	10	3
SAMPLE_1084	10	11	4
SAMPLE_1086	6	12	2
SAMPLE_21497	9	6	2
SAMPLE_603	2	5	0
SAMPLE_600	9	18	1
SAMPLE_1913	4	5	1
SAMPLE_1087	7	14	3
SAMPLE_21498	3	9	4
SAMPLE_21499	0	2	0
SAMPLE_21500	6	1	0
SAMPLE_6786	3	8	3
SAMPLE_15111	8	7	0
SAMPLE_15110	6	8	3
SAMPLE_1090	3	9	1
SAMPLE_1091	2	6	3
SAMPLE_1092	3	6	0
SAMPLE_1093	1	7	1
SAMPLE_3221	0	3	1
SAMPLE_3222	5	7	1
SAMPLE_6785	8	16	2
SAMPLE_1096	3	5	2
SAMPLE_21501	7	20	3
SAMPLE_13965	7	13	0
SAMPLE_929	8	8	0
SAMPLE_930	8	12	0
SAMPLE_1099	3	3	2
SAMPLE_1102	3	8	3
SAMPLE_1350	12	12	2
SAMPLE_21502	7	11	2
SAMPLE_1105	8	23	2
SAMPLE_21503	4	8	2
SAMPLE_21504	2	10	1
SAMPLE_1108	2	2	0
SAMPLE_21505	5	14	4
SAMPLE_21506	5	4	1
SAMPLE_21507	5	11	1
SAMPLE_897	2	11	0
SAMPLE_896	1	7	1
SAMPLE_21508	6	5	3
SAMPLE_1111	6	11	3
SAMPLE_1114	3	6	2
SAMPLE_21509	2	6	1
SAMPLE_3219	3	17	3
SAMPLE_21510	5	10	3
SAMPLE_21511	1	4	2
SAMPLE_21512	2	5	1
SAMPLE_1117	1	8	2
SAMPLE_21513	5	9	1
SAMPLE_1120	16	19	3
SAMPLE_21514	4	15	1
SAMPLE_1123	1	6	2
SAMPLE_1126	4	7	1
SAMPLE_21515	2	6	4
SAMPLE_1129	8	4	1
SAMPLE_1132	8	11	2
SAMPLE_1135	3	13	0
SAMPLE_21516	6	16	1
SAMPLE_1061	5	7	0
SAMPLE_1062	3	12	3
SAMPLE_1138	9	10	1
SAMPLE_1141	0	5	3
SAMPLE_1144	6	7	1
SAMPLE_1136	1	5	0
SAMPLE_1147	4	5	0
SAMPLE_1150	1	11	1
SAMPLE_21517	9	14	1
SAMPLE_21518	7	8	0
SAMPLE_1153	6	14	0
SAMPLE_21519	5	10	3
SAMPLE_21520	1	5	5
SAMPLE_1159	2	8	3
SAMPLE_1156	13	26	2
SAMPLE_21521	2	9	1
SAMPLE_1162	11	5	1
SAMPLE_21522	2	4	1
SAMPLE_21523	8	10	0
SAMPLE_1165	1	6	0
SAMPLE_1610	0	3	0
SAMPLE_1168	11	13	3
SAMPLE_1171	2	5	2
SAMPLE_1174	8	7	4
SAMPLE_21524	12	14	3
SAMPLE_1177	10	14	0
SAMPLE_953	7	15	1
SAMPLE_954	7	7	0
SAMPLE_21525	11	24	5
SAMPLE_21526	1	5	1
SAMPLE_21527	4	5	4
SAMPLE_21528	1	3	0
SAMPLE_4944	1	4	3
SAMPLE_4943	0	6	1
SAMPLE_1180	5	7	1
SAMPLE_21529	13	8	0
SAMPLE_1183	0	6	2
SAMPLE_1186	6	17	3
SAMPLE_780	11	14	1
SAMPLE_779	10	7	2
SAMPLE_1107	12	15	0
SAMPLE_8589	5	4	3
SAMPLE_8588	0	16	1
SAMPLE_1189	3	8	5
SAMPLE_21530	8	7	2
SAMPLE_206	1	3	2
SAMPLE_207	1	3	1
SAMPLE_1192	1	3	2
SAMPLE_1195	0	6	1
SAMPLE_21531	3	5	0
SAMPLE_21532	10	8	1
SAMPLE_21533	7	18	0
SAMPLE_21534	2	4	1
SAMPLE_21535	2	10	0
SAMPLE_21536	7	9	3
SAMPLE_21537	12	22	2
SAMPLE_21538	1	8	2
SAMPLE_194	3	6	0
SAMPLE_195	2	3	0
SAMPLE_21539	5	18	3
SAMPLE_21540	5	4	1
SAMPLE_21541	10	10	1
SAMPLE_21542	12	15	0
SAMPLE_4283	4	7	1
SAMPLE_4284	1	7	0
SAMPLE_21543	2	7	2
SAMPLE_21544	3	15	0
SAMPLE_1198	17	15	3
SAMPLE_1106	12	25	3
SAMPLE_1201	1	7	1
SAMPLE_1207	0	0	0
SAMPLE_1204	9	4	1
SAMPLE_1697	6	19	2
SAMPLE_1698	4	16	2
SAMPLE_1210	9	13	1
SAMPLE_1213	2	6	1
SAMPLE_21545	1	3	1
SAMPLE_21546	2	4	0
SAMPLE_21547	5	11	0
SAMPLE_1216	0	6	1
SAMPLE_1218	4	5	1
SAMPLE_21548	4	8	1
SAMPLE_1219	2	8	0
SAMPLE_21549	11	18	2
SAMPLE_1222	8	14	0
SAMPLE_1225	2	3	0
SAMPLE_21550	8	6	1
SAMPLE_21551	4	8	0
SAMPLE_21552	2	11	0
SAMPLE_21553	7	10	1
SAMPLE_1070	5	13	0
SAMPLE_1071	6	14	1
SAMPLE_21554	1	4	1
SAMPLE_1228	2	4	1
SAMPLE_21555	6	10	2
SAMPLE_21556	1	4	3
SAMPLE_21557	5	9	1
SAMPLE_1231	3	8	1
SAMPLE_1452	3	4	4
SAMPLE_21558	2	4	3
SAMPLE_1234	2	3	1
SAMPLE_879	1	5	1
SAMPLE_21559	6	8	1
SAMPLE_21560	2	6	1
SAMPLE_1237	7	6	0
SAMPLE_1240	3	1	0
SAMPLE_21561	5	8	2
SAMPLE_21562	2	4	3
SAMPLE_1243	4	9	1
SAMPLE_21563	4	8	0
SAMPLE_21564	8	10	1
SAMPLE_1246	1	6	1
SAMPLE_21565	2	7	2
SAMPLE_1164	11	13	1
SAMPLE_1163	8	5	0
SAMPLE_21566	1	7	5
SAMPLE_21567	4	6	2
SAMPLE_21568	12	13	4
SAMPLE_3318	8	17	2
SAMPLE_3317	5	15	3
SAMPLE_21569	12	15	2
SAMPLE_1252	2	6	4
SAMPLE_1249	6	9	7
SAMPLE_1217	1	4	0
SAMPLE_21570	3	8	1
SAMPLE_21571	13	11	2
SAMPLE_1255	5	5	1
SAMPLE_21572	4	8	1
SAMPLE_1032	7	7	1
SAMPLE_21573	4	23	3
SAMPLE_21574	0	4	0
SAMPLE_21575	4	8	1
SAMPLE_21576	1	4	1
SAMPLE_21577	3	9	0
SAMPLE_21578	1	4	2
SAMPLE_21579	2	8	4
SAMPLE_1261	1	10	3
SAMPLE_1258	6	9	3
SAMPLE_1264	0	5	1
SAMPLE_1267	7	3	0
SAMPLE_21580	5	14	1
SAMPLE_1270	3	5	1
SAMPLE_1273	3	9	0
SAMPLE_1277	5	9	1
SAMPLE_1276	3	14	1
SAMPLE_1278	3	13	1
SAMPLE_878	2	8	2
SAMPLE_1279	4	11	0
SAMPLE_21581	29	40	7
SAMPLE_21582	5	3	4
SAMPLE_6182	18	24	1
SAMPLE_21583	4	11	3
SAMPLE_1282	1	8	1
SAMPLE_21584	2	3	1
SAMPLE_1285	11	13	3
SAMPLE_8235	9	18	1
SAMPLE_21585	1	6	4
SAMPLE_1288	9	6	1
SAMPLE_21586	9	9	0
SAMPLE_1142	6	6	1
SAMPLE_1143	1	5	2
SAMPLE_21587	2	5	3
SAMPLE_21588	1	7	1
SAMPLE_1291	4	6	2
SAMPLE_8234	15	27	3
SAMPLE_21589	0	6	1
SAMPLE_1294	3	2	3
SAMPLE_21590	5	8	1
SAMPLE_21591	11	14	3
SAMPLE_810	8	13	2
SAMPLE_809	2	6	2
SAMPLE_21592	5	6	0
SAMPLE_1297	1	5	0
SAMPLE_1300	4	10	1
SAMPLE_1303	4	6	0
SAMPLE_21593	1	11	0
SAMPLE_21594	4	10	1
SAMPLE_21595	2	7	1
SAMPLE_14072	8	11	1
SAMPLE_14073	4	6	1
SAMPLE_21596	4	7	1
SAMPLE_704	3	9	2
SAMPLE_705	1	5	0
SAMPLE_21597	6	10	1
SAMPLE_1306	5	9	2
SAMPLE_1309	1	8	1
SAMPLE_1312	3	7	3
SAMPLE_21598	4	7	0
SAMPLE_21599	2	5	1
SAMPLE_1315	3	7	0
SAMPLE_21600	2	4	1
SAMPLE_21601	2	5	1
SAMPLE_21602	3	6	1
SAMPLE_966	5	9	2
SAMPLE_965	2	6	3
SAMPLE_1318	2	8	3
SAMPLE_1321	3	8	2
SAMPLE_11012	14	10	1
SAMPLE_21603	4	6	1
SAMPLE_21604	5	16	4
SAMPLE_21605	17	29	0
SAMPLE_21606	4	14	4
SAMPLE_1173	6	10	2
SAMPLE_1172	2	10	1
SAMPLE_21607	9	16	1
SAMPLE_21608	2	8	1
SAMPLE_1324	4	11	1
SAMPLE_1327	5	14	1
SAMPLE_1330	6	5	1
SAMPLE_1335	1	5	1
SAMPLE_1334	0	2	0
SAMPLE_1333	2	2	0
SAMPLE_1031	3	6	0
SAMPLE_1336	19	15	5
SAMPLE_21609	1	7	3
SAMPLE_1339	8	10	2
SAMPLE_21610	4	6	3
SAMPLE_21611	9	14	1
SAMPLE_21612	17	24	1
SAMPLE_1342	10	22	0
SAMPLE_21613	1	3	0
SAMPLE_180	8	8	0
SAMPLE_179	5	7	1
SAMPLE_21614	9	15	0
SAMPLE_17852	6	4	1
SAMPLE_21615	3	9	3
SAMPLE_1345	7	9	0
SAMPLE_21616	0	2	1
SAMPLE_674	7	9	0
SAMPLE_675	4	7	1
SAMPLE_21617	2	8	0
SAMPLE_21618	3	6	0
SAMPLE_21619	12	19	2
SAMPLE_21620	4	8	1
SAMPLE_21621	2	11	1
SAMPLE_1348	4	9	0
SAMPLE_21622	3	8	3
SAMPLE_1351	4	11	1
SAMPLE_21623	4	7	1
SAMPLE_21624	4	5	1
SAMPLE_1354	2	8	1
SAMPLE_21625	2	5	1
SAMPLE_21626	2	6	1
SAMPLE_21627	4	3	0
SAMPLE_1274	1	10	2
SAMPLE_1275	7	11	3
SAMPLE_1357	2	6	1
SAMPLE_1360	3	6	1
SAMPLE_21628	1	7	3
SAMPLE_21629	1	9	1
SAMPLE_21630	16	28	2
SAMPLE_1363	9	13	1
SAMPLE_21631	2	5	1
SAMPLE_1366	3	5	1
SAMPLE_21632	3	6	1
SAMPLE_1369	4	9	1
SAMPLE_21633	1	8	1
SAMPLE_1517	1	3	0
SAMPLE_1518	2	7	0
SAMPLE_1280	7	8	2
SAMPLE_1281	4	9	1
SAMPLE_21634	6	20	0
SAMPLE_1374	3	4	8
SAMPLE_1372	2	1	3
SAMPLE_1373	4	1	4
SAMPLE_1329	13	10	1
SAMPLE_1375	2	8	2
SAMPLE_1760	3	6	1
SAMPLE_1378	8	13	0
SAMPLE_1381	0	4	1
SAMPLE_1384	6	11	1
SAMPLE_1451	2	7	1
SAMPLE_1387	8	11	1
SAMPLE_21635	5	11	2
SAMPLE_21636	9	7	4
SAMPLE_1390	2	3	2
SAMPLE_1393	0	8	1
SAMPLE_21637	10	8	2
SAMPLE_21638	4	11	0
SAMPLE_1396	7	10	0
SAMPLE_21639	3	4	0
SAMPLE_1399	2	4	0
SAMPLE_1403	5	9	4
SAMPLE_1404	3	6	2
SAMPLE_1402	0	7	1
SAMPLE_1307	2	2	0
SAMPLE_1406	2	10	3
SAMPLE_1308	1	3	2
SAMPLE_1407	0	4	4
SAMPLE_1405	0	4	4
SAMPLE_21640	4	10	1
SAMPLE_21641	1	8	0
SAMPLE_21642	1	4	1
SAMPLE_21643	8	18	1
SAMPLE_21644	6	10	1
SAMPLE_1408	3	13	2
SAMPLE_21645	1	3	3
SAMPLE_1411	1	2	5
SAMPLE_1414	12	18	3
SAMPLE_1417	12	8	1
SAMPLE_1420	0	5	3
SAMPLE_1423	4	4	4
SAMPLE_1426	5	4	0
SAMPLE_873	2	5	4
SAMPLE_872	2	6	5
SAMPLE_1422	0	3	2
SAMPLE_1421	3	5	0
SAMPLE_845	5	6	4
SAMPLE_1412	2	5	4
SAMPLE_1413	1	0	3
SAMPLE_1429	2	2	0
SAMPLE_1293	9	11	1
SAMPLE_1338	7	13	4
SAMPLE_1337	5	17	2
SAMPLE_21646	2	7	1
SAMPLE_21647	1	7	0
SAMPLE_1432	3	6	1
SAMPLE_21648	6	9	0
SAMPLE_21649	2	5	0
SAMPLE_21650	1	6	1
SAMPLE_21651	1	3	3
SAMPLE_21652	1	5	0
SAMPLE_21653	7	3	2
SAMPLE_21654	2	7	0
SAMPLE_1435	4	11	0
SAMPLE_21655	1	5	0
SAMPLE_21656	11	11	2
SAMPLE_21657	3	3	1
SAMPLE_21658	4	11	1
SAMPLE_1438	13	10	1
SAMPLE_21659	1	2	0
SAMPLE_21660	8	12	2
SAMPLE_21661	5	10	2
SAMPLE_1441	1	2	2
SAMPLE_1442	0	4	3
SAMPLE_21662	6	10	1
SAMPLE_1443	1	3	2
SAMPLE_21663	4	7	1
SAMPLE_1444	1	3	6
SAMPLE_1446	0	4	3
SAMPLE_1445	3	3	4
SAMPLE_21664	6	13	0
SAMPLE_1447	7	18	3
SAMPLE_21665	8	19	1
SAMPLE_21666	3	8	1
SAMPLE_1450	9	17	3
SAMPLE_21667	2	24	3
SAMPLE_21668	4	8	4
SAMPLE_21669	4	9	4
SAMPLE_21670	1	4	1
SAMPLE_4901	1	5	2
SAMPLE_4902	0	6	1
SAMPLE_21671	7	11	0
SAMPLE_1229	2	5	0
SAMPLE_1230	1	5	3
SAMPLE_21672	3	7	1
SAMPLE_1453	5	6	1
SAMPLE_1454	2	4	0
SAMPLE_1455	3	4	1
SAMPLE_525	4	11	1
SAMPLE_524	2	6	1
SAMPLE_21673	2	9	0
SAMPLE_1456	7	20	2
SAMPLE_1467	2	8	1
SAMPLE_1464	2	10	0
SAMPLE_1463	2	3	3
SAMPLE_1460	1	3	3
SAMPLE_1461	6	14	3
SAMPLE_21674	3	8	2
SAMPLE_1459	2	7	1
SAMPLE_1462	0	5	1
SAMPLE_1466	1	9	1
SAMPLE_1465	6	11	2
SAMPLE_21675	17	17	4
SAMPLE_21676	4	6	2
SAMPLE_1468	4	4	0
SAMPLE_1471	0	7	1
SAMPLE_21677	1	11	2
SAMPLE_21678	4	7	1
SAMPLE_1474	7	19	1
SAMPLE_1305	5	8	0
SAMPLE_1477	4	13	0
SAMPLE_1322	0	4	0
SAMPLE_1058	5	10	5
SAMPLE_21679	24	28	3
SAMPLE_21680	5	9	0
SAMPLE_1304	6	6	2
SAMPLE_21681	1	5	2
SAMPLE_1481	2	7	2
SAMPLE_1482	3	5	1
SAMPLE_1480	3	12	1
SAMPLE_21682	2	11	3
SAMPLE_1483	1	8	4
SAMPLE_6306	3	9	1
SAMPLE_21683	13	17	1
SAMPLE_21684	0	4	1
SAMPLE_21685	5	6	5
SAMPLE_21686	1	5	2
SAMPLE_21687	7	12	2
SAMPLE_21688	7	9	1
SAMPLE_21689	11	11	3
SAMPLE_21690	2	5	1
SAMPLE_21691	1	5	0
SAMPLE_1328	3	9	0
SAMPLE_1486	2	3	2
SAMPLE_21692	2	3	1
SAMPLE_21693	1	6	0
SAMPLE_21694	4	5	0
SAMPLE_21695	0	9	0
SAMPLE_21696	3	1	0
SAMPLE_1489	1	1	0
SAMPLE_21697	6	9	0
SAMPLE_21698	1	3	0
SAMPLE_21699	10	16	2
SAMPLE_21700	4	7	2
SAMPLE_21701	7	7	1
SAMPLE_1476	11	13	0
SAMPLE_1475	4	7	0
SAMPLE_1492	3	12	1
SAMPLE_1494	1	9	1
SAMPLE_1493	0	0	0
SAMPLE_1145	1	6	0
SAMPLE_1146	3	5	0
SAMPLE_1495	0	3	1
SAMPLE_1498	2	12	1
SAMPLE_21702	11	14	1
SAMPLE_21703	5	18	2
SAMPLE_1501	7	11	2
SAMPLE_1504	5	8	1
SAMPLE_1505	2	7	1
SAMPLE_1506	1	12	3
SAMPLE_21704	0	8	1
SAMPLE_21705	3	9	4
SAMPLE_21706	2	5	0
SAMPLE_21707	0	8	2
SAMPLE_1507	4	5	2
SAMPLE_21708	6	16	2
SAMPLE_21709	2	7	3
SAMPLE_21710	1	10	0
SAMPLE_21711	5	8	3
SAMPLE_21712	2	14	0
SAMPLE_1510	4	14	0
SAMPLE_1513	2	7	2
SAMPLE_21713	1	5	1
SAMPLE_1516	0	1	0
SAMPLE_1519	5	6	2
SAMPLE_3089	2	7	2
SAMPLE_3090	7	13	2
SAMPLE_1522	1	9	0
SAMPLE_1532	6	3	1
SAMPLE_1533	4	12	2
SAMPLE_1525	3	9	2
SAMPLE_1528	2	9	4
SAMPLE_21714	2	8	3
SAMPLE_21715	6	9	0
SAMPLE_21716	2	5	1
SAMPLE_1531	2	3	1
SAMPLE_1299	2	6	0
SAMPLE_1298	3	10	0
SAMPLE_1536	1	1	3
SAMPLE_1534	3	8	3
SAMPLE_1535	3	7	5
SAMPLE_1537	10	16	4
SAMPLE_1544	6	7	0
SAMPLE_21717	29	37	3
SAMPLE_21718	2	5	1
SAMPLE_1323	2	5	2
SAMPLE_1540	4	7	0
SAMPLE_21719	2	7	2
SAMPLE_1543	4	10	1
SAMPLE_1545	3	5	1
SAMPLE_21720	2	2	0
SAMPLE_21721	5	10	0
SAMPLE_1546	0	2	1
SAMPLE_21722	2	5	2
SAMPLE_21723	3	6	2
SAMPLE_1549	4	5	2
SAMPLE_1552	6	10	3
SAMPLE_17	3	5	1
SAMPLE_1555	4	8	0
SAMPLE_527	4	13	1
SAMPLE_1572	3	5	3
SAMPLE_1059	4	10	2
SAMPLE_1547	2	7	0
SAMPLE_21724	2	2	0
SAMPLE_21725	5	6	0
SAMPLE_1416	4	21	1
SAMPLE_21726	3	11	3
SAMPLE_1558	8	12	2
SAMPLE_18	11	15	4
SAMPLE_528	4	4	1
SAMPLE_1561	11	24	1
SAMPLE_1564	4	7	2
SAMPLE_21727	3	8	1
SAMPLE_21728	4	3	0
SAMPLE_21729	2	9	4
SAMPLE_21730	9	5	0
SAMPLE_1567	6	19	0
SAMPLE_21731	1	6	1
SAMPLE_1109	3	5	1
SAMPLE_855	4	7	1
SAMPLE_1570	7	16	1
SAMPLE_1573	4	11	2
SAMPLE_1576	3	5	2
SAMPLE_1578	4	12	1
SAMPLE_1577	3	10	3
SAMPLE_1581	3	6	2
SAMPLE_1579	6	6	0
SAMPLE_21732	7	14	5
SAMPLE_1582	1	6	3
SAMPLE_1583	0	8	2
SAMPLE_1584	3	5	1
SAMPLE_1587	3	3	0
SAMPLE_1586	2	10	0
SAMPLE_1585	0	6	0
SAMPLE_21733	5	10	3
SAMPLE_21734	1	7	1
SAMPLE_1485	7	10	2
SAMPLE_1484	0	9	3
SAMPLE_1588	14	16	1
SAMPLE_1580	10	9	2
SAMPLE_1670	5	3	0
SAMPLE_1592	0	5	0
SAMPLE_1591	2	4	0
SAMPLE_1593	2	8	0
SAMPLE_21735	6	6	2
SAMPLE_1594	4	11	2
SAMPLE_1597	4	3	1
SAMPLE_1598	0	6	0
SAMPLE_1599	1	8	0
SAMPLE_1600	6	7	1
SAMPLE_1415	3	11	1
SAMPLE_1640	1	7	2
SAMPLE_1641	3	4	1
SAMPLE_1603	1	9	0
SAMPLE_1606	5	14	2
SAMPLE_21736	0	4	0
SAMPLE_1137	1	7	2
SAMPLE_1609	2	6	1
SAMPLE_1613	4	8	3
SAMPLE_1612	0	6	1
SAMPLE_1614	2	5	0
SAMPLE_1615	9	6	1
SAMPLE_21737	9	9	1
SAMPLE_21738	6	7	0
SAMPLE_1618	2	3	4
SAMPLE_21739	4	4	1
SAMPLE_21740	2	6	1
SAMPLE_1621	2	4	1
SAMPLE_1624	3	6	1
SAMPLE_1627	2	15	0
SAMPLE_758	3	2	2
SAMPLE_759	2	3	0
SAMPLE_416	7	14	2
SAMPLE_419	2	5	3
SAMPLE_417	12	10	1
SAMPLE_420	3	10	5
SAMPLE_1630	4	9	3
SAMPLE_59	1	8	2
SAMPLE_60	3	2	1
SAMPLE_1633	2	8	1
SAMPLE_21741	2	11	1
SAMPLE_21742	2	7	2
SAMPLE_21743	2	4	1
SAMPLE_1636	1	5	1
SAMPLE_8310	12	19	1
SAMPLE_21744	0	9	1
SAMPLE_21745	5	12	1
SAMPLE_21746	6	4	1
SAMPLE_21747	1	7	1
SAMPLE_21748	8	12	0
SAMPLE_1639	5	4	4
SAMPLE_1642	6	20	1
SAMPLE_21749	6	6	1
SAMPLE_1397	4	10	2
SAMPLE_1398	3	12	1
SAMPLE_21750	4	12	1
SAMPLE_1645	1	8	2
SAMPLE_21751	9	15	4
SAMPLE_21752	10	23	4
SAMPLE_1648	4	8	4
SAMPLE_1649	1	4	1
SAMPLE_21753	5	4	0
SAMPLE_1653	2	6	1
SAMPLE_1652	0	1	0
SAMPLE_1651	3	11	2
SAMPLE_1650	1	2	1
SAMPLE_21754	3	4	3
SAMPLE_21755	2	7	4
SAMPLE_21756	4	7	0
SAMPLE_1657	4	8	0
SAMPLE_1654	7	6	3
SAMPLE_1660	3	4	0
SAMPLE_1663	4	10	1
SAMPLE_21757	5	6	1
SAMPLE_21758	3	7	0
SAMPLE_21759	2	0	1
SAMPLE_1833	1	4	0
SAMPLE_1832	2	5	5
SAMPLE_21760	9	12	2
SAMPLE_21761	3	5	2
SAMPLE_1440	8	10	1
SAMPLE_1439	7	7	2
SAMPLE_1666	6	8	2
SAMPLE_1709	2	2	0
SAMPLE_1671	1	6	0
SAMPLE_1669	0	4	0
SAMPLE_2120	2	5	5
SAMPLE_2121	2	9	2
SAMPLE_11562	3	7	1
SAMPLE_11561	5	12	2
SAMPLE_1638	3	4	1
SAMPLE_1637	8	6	3
SAMPLE_1710	0	8	2
SAMPLE_1672	4	4	0
SAMPLE_1673	6	10	0
SAMPLE_1674	0	1	0
SAMPLE_1675	2	6	3
SAMPLE_1678	1	8	1
SAMPLE_21762	1	8	1
SAMPLE_21763	2	5	1
SAMPLE_1681	4	5	1
SAMPLE_1683	4	7	1
SAMPLE_1682	10	10	1
SAMPLE_21764	14	31	1
SAMPLE_21765	1	13	4
SAMPLE_21766	4	6	1
SAMPLE_21767	0	5	1
SAMPLE_21768	4	5	5
SAMPLE_21769	1	9	0
SAMPLE_1684	2	5	1
SAMPLE_1689	4	15	5
SAMPLE_1688	6	4	1
SAMPLE_1687	2	9	2
SAMPLE_1686	2	4	0
SAMPLE_1685	4	9	1
SAMPLE_1690	5	12	0
SAMPLE_1371	5	8	2
SAMPLE_1370	0	6	0
SAMPLE_21770	1	2	0
SAMPLE_21771	1	1	0
SAMPLE_21772	0	8	2
SAMPLE_21773	2	1	2
SAMPLE_1383	1	7	1
SAMPLE_1382	1	4	1
SAMPLE_7289	1	13	0
SAMPLE_7290	4	5	0
SAMPLE_1112	8	11	1
SAMPLE_1113	3	12	2
SAMPLE_21774	3	6	0
SAMPLE_21775	10	18	1
SAMPLE_21776	3	9	1
SAMPLE_21777	2	4	1
SAMPLE_21778	3	9	1
SAMPLE_21779	7	8	0
SAMPLE_21780	4	7	3
SAMPLE_21781	1	8	1
SAMPLE_1693	5	10	2
SAMPLE_1696	5	15	2
SAMPLE_1699	7	12	1
SAMPLE_1702	1	5	1
SAMPLE_21782	2	7	2
SAMPLE_1705	2	4	2
SAMPLE_21783	8	12	1
SAMPLE_21784	3	7	4
SAMPLE_1708	2	7	0
SAMPLE_21785	4	4	1
SAMPLE_21786	6	16	1
SAMPLE_21787	5	11	0
SAMPLE_1979	3	10	2
SAMPLE_1711	0	8	0
SAMPLE_1713	1	8	1
SAMPLE_21788	4	12	0
SAMPLE_1714	1	5	0
SAMPLE_21789	4	11	3
SAMPLE_21790	1	7	3
SAMPLE_1712	4	14	2
SAMPLE_1263	0	6	4
SAMPLE_1260	8	14	0
SAMPLE_21791	1	10	1
SAMPLE_843	1	2	0
SAMPLE_1717	1	7	1
SAMPLE_842	1	4	1
SAMPLE_21792	7	10	0
SAMPLE_1938	0	7	3
SAMPLE_1937	0	5	4
SAMPLE_1720	1	5	1
SAMPLE_21793	3	6	1
SAMPLE_1723	2	5	2
SAMPLE_1233	1	6	0
SAMPLE_1232	1	3	0
SAMPLE_399	2	11	1
SAMPLE_21794	6	7	0
SAMPLE_1430	5	5	1
SAMPLE_1431	2	4	0
SAMPLE_1726	7	9	1
SAMPLE_21795	3	9	3
SAMPLE_21796	1	8	1
SAMPLE_21797	2	7	3
SAMPLE_21798	2	5	1
SAMPLE_398	3	10	2
SAMPLE_21799	0	4	1
SAMPLE_95	2	7	4
SAMPLE_96	5	10	1
SAMPLE_21800	2	5	0
SAMPLE_21801	1	7	3
SAMPLE_21802	1	4	1
SAMPLE_21803	7	24	2
SAMPLE_1729	11	12	1
[truncated: 39,758 more rows]
