# Supplementary material for: Systematic analysis of paralogous regions in 41,755 exomes uncovers clinically relevant variation
Source: Research Square preprint supplement (doi:10.21203/rs.3.rs-2302399/v1), 2022-11-29
Supplement: Supplementary file 3 [file STable11.xlsx]

## Sheet: STable11
SampleId	FamilyId	FamilyMember	EnrichmentKit	Sequencer	ReadLength	MolStatus
SAMPLE_10	TRIO_4	CHILD	agilentV4	HiSeq2000	100	diagnosed
SAMPLE_10051	TRIO_3351	CHILD	agilentV5	HiSeq4000	150	diagnosed
SAMPLE_10084	TRIO_3362	CHILD	agilentV5	HiSeq4000	150	diagnosed
SAMPLE_10108	TRIO_3370	CHILD	agilentV5	HiSeq4000	150	diagnosed
SAMPLE_10117	TRIO_3373	CHILD	agilentV5	HiSeq4000	150	diagnosed
SAMPLE_10126	TRIO_3376	CHILD	agilentV5	HiSeq4000	150	diagnosed
SAMPLE_10150	TRIO_3384	CHILD	agilentV5	HiSeq4000	150	diagnosed
SAMPLE_10156	TRIO_3386	CHILD	agilentV5	HiSeq4000	150	diagnosed
SAMPLE_10171	TRIO_3391	CHILD	agilentV5	HiSeq4000	150	diagnosed
SAMPLE_10189	TRIO_3397	CHILD	agilentV5	HiSeq4000	150	diagnosed
SAMPLE_1021	TRIO_341	CHILD	agilentV4	HiSeq2000	100	diagnosed
SAMPLE_10219	TRIO_3407	CHILD	agilentV5	HiSeq4000	150	diagnosed
SAMPLE_10228	TRIO_3410	CHILD	agilentV5	HiSeq4000	150	diagnosed
SAMPLE_1024	TRIO_342	CHILD	agilentV4	HiSeq2000	100	diagnosed
SAMPLE_10303	TRIO_3435	CHILD	agilentV5	HiSeq4000	150	diagnosed
SAMPLE_10327	TRIO_3443	CHILD	agilentV5	HiSeq4000	150	diagnosed
SAMPLE_10333	TRIO_3445	CHILD	agilentV5	HiSeq4000	150	diagnosed
SAMPLE_10348	TRIO_3450	CHILD	agilentV5	HiSeq4000	150	diagnosed
SAMPLE_10372	TRIO_3458	CHILD	agilentV5	HiSeq4000	150	diagnosed
SAMPLE_1042	TRIO_348	CHILD	agilentV4	HiSeq2000	100	diagnosed
SAMPLE_10468	TRIO_3490	CHILD	agilentV5	HiSeq4000	150	diagnosed
SAMPLE_10546	TRIO_3516	CHILD	agilentV5	HiSeq4000	150	diagnosed
SAMPLE_1057	TRIO_353	CHILD	agilentV4	HiSeq2000	100	diagnosed
SAMPLE_10609	TRIO_3537	CHILD	agilentV5	HiSeq4000	150	diagnosed
SAMPLE_1063	TRIO_355	CHILD	agilentV4	HiSeq2000	100	diagnosed
SAMPLE_10630	TRIO_3544	CHILD	agilentV5	HiSeq4000	150	diagnosed
SAMPLE_10642	TRIO_3548	CHILD	agilentV5	HiSeq4000	150	diagnosed
SAMPLE_10645	TRIO_3549	CHILD	agilentV5	HiSeq4000	150	diagnosed
SAMPLE_10651	TRIO_3551	CHILD	agilentV5	HiSeq4000	150	diagnosed
SAMPLE_10678	TRIO_3560	CHILD	agilentV5	HiSeq4000	150	diagnosed
SAMPLE_10696	TRIO_3566	CHILD	agilentV5	HiSeq4000	150	diagnosed
SAMPLE_10738	TRIO_3580	CHILD	agilentV5	HiSeq4000	150	diagnosed
SAMPLE_10747	TRIO_3583	CHILD	agilentV5	HiSeq4000	150	diagnosed
SAMPLE_10774	TRIO_3592	CHILD	agilentV5	HiSeq4000	150	diagnosed
SAMPLE_10783	TRIO_3595	CHILD	agilentV5	HiSeq4000	150	diagnosed
SAMPLE_10816	TRIO_3606	CHILD	agilentV5	HiSeq4000	150	diagnosed
SAMPLE_10834	TRIO_3612	CHILD	agilentV5	HiSeq4000	150	diagnosed
SAMPLE_1084	TRIO_362	CHILD	agilentV5	HiSeq4000	150	diagnosed
SAMPLE_10876	TRIO_3626	CHILD	agilentV5	HiSeq4000	150	diagnosed
SAMPLE_10903	TRIO_3635	CHILD	agilentV5	HiSeq4000	150	diagnosed
SAMPLE_10915	TRIO_3639	CHILD	agilentV5	HiSeq4000	150	diagnosed
SAMPLE_10933	TRIO_3645	CHILD	agilentV5	HiSeq4000	150	diagnosed
SAMPLE_1096	TRIO_366	CHILD	agilentV4	HiSeq2000	100	diagnosed
SAMPLE_10963	TRIO_3655	CHILD	agilentV5	HiSeq4000	150	diagnosed
SAMPLE_10969	TRIO_3657	CHILD	agilentV5	HiSeq4000	150	diagnosed
SAMPLE_10978	TRIO_3660	CHILD	agilentV5	HiSeq4000	150	diagnosed
SAMPLE_10981	TRIO_3661	CHILD	agilentV5	HiSeq4000	150	diagnosed
SAMPLE_10990	TRIO_3664	CHILD	agilentV5	HiSeq4000	150	diagnosed
SAMPLE_10993	TRIO_3665	CHILD	agilentV5	HiSeq4000	150	diagnosed
SAMPLE_10996	TRIO_3666	CHILD	agilentV5	HiSeq4000	150	diagnosed
SAMPLE_11011	TRIO_3671	CHILD	agilentV5	HiSeq4000	150	diagnosed
SAMPLE_11032	TRIO_3678	CHILD	agilentV5	HiSeq4000	150	diagnosed
SAMPLE_11041	TRIO_3681	CHILD	agilentV5	HiSeq4000	150	diagnosed
SAMPLE_11065	TRIO_3689	CHILD	agilentV5	HiSeq4000	150	diagnosed
SAMPLE_1111	TRIO_371	CHILD	agilentV4	HiSeq2000	100	diagnosed
SAMPLE_11125	TRIO_3709	CHILD	agilentV5	HiSeq4000	150	diagnosed
SAMPLE_11155	TRIO_3719	CHILD	agilentV5	HiSeq4000	150	diagnosed
SAMPLE_11158	TRIO_3720	CHILD	agilentV5	HiSeq4000	150	diagnosed
SAMPLE_112	TRIO_38	CHILD	agilentV4	HiSeq2000	100	diagnosed
SAMPLE_11200	TRIO_3734	CHILD	agilentV5	HiSeq4000	150	diagnosed
SAMPLE_11221	TRIO_3741	CHILD	agilentV5	HiSeq4000	150	diagnosed
SAMPLE_11233	TRIO_3745	CHILD	agilentV5	HiSeq4000	150	diagnosed
SAMPLE_11254	TRIO_3752	CHILD	agilentV5	HiSeq4000	150	diagnosed
SAMPLE_11272	TRIO_3758	CHILD	agilentV5	HiSeq4000	150	diagnosed
SAMPLE_11281	TRIO_3761	CHILD	agilentV5	HiSeq4000	150	diagnosed
SAMPLE_11293	TRIO_3765	CHILD	agilentV5	HiSeq4000	150	diagnosed
SAMPLE_11308	TRIO_3770	CHILD	agilentV5	HiSeq4000	150	diagnosed
SAMPLE_11323	TRIO_3775	CHILD	agilentV5	HiSeq4000	150	diagnosed
SAMPLE_11377	TRIO_3793	CHILD	agilentV5	HiSeq4000	150	diagnosed
SAMPLE_11437	TRIO_3813	CHILD	agilentV5	HiSeq4000	150	diagnosed
SAMPLE_1144	TRIO_382	CHILD	agilentV4	HiSeq2000	100	diagnosed
SAMPLE_11494	TRIO_3832	CHILD	agilentV5	HiSeq4000	150	diagnosed
SAMPLE_11506	TRIO_3836	CHILD	agilentV5	HiSeq4000	150	diagnosed
SAMPLE_11515	TRIO_3839	CHILD	agilentV5	HiSeq4000	150	diagnosed
SAMPLE_11524	TRIO_3842	CHILD	agilentV5	HiSeq4000	150	diagnosed
SAMPLE_11527	TRIO_3843	CHILD	agilentV5	HiSeq4000	150	diagnosed
SAMPLE_11551	TRIO_3851	CHILD	agilentV5	HiSeq4000	150	diagnosed
SAMPLE_11557	TRIO_3853	CHILD	agilentV5	HiSeq4000	150	diagnosed
SAMPLE_11581	TRIO_3861	CHILD	agilentV5	HiSeq4000	150	diagnosed
SAMPLE_11590	TRIO_3864	CHILD	agilentV5	HiSeq4000	150	diagnosed
SAMPLE_11620	TRIO_3874	CHILD	agilentV5	HiSeq4000	150	diagnosed
SAMPLE_11641	TRIO_3881	CHILD	agilentV5	HiSeq4000	150	diagnosed
SAMPLE_11644	TRIO_3882	CHILD	agilentV5	HiSeq4000	150	diagnosed
SAMPLE_1165	TRIO_389	CHILD	agilentV4	HiSeq2000	100	diagnosed
SAMPLE_11707	TRIO_3903	CHILD	agilentV5	HiSeq4000	150	diagnosed
SAMPLE_11791	TRIO_3931	CHILD	agilentV5	HiSeq4000	150	diagnosed
SAMPLE_11794	TRIO_3932	CHILD	agilentV5	HiSeq4000	150	diagnosed
SAMPLE_1180	TRIO_394	CHILD	agilentV4	HiSeq2000	100	diagnosed
SAMPLE_11818	TRIO_3940	CHILD	agilentV5	HiSeq4000	150	diagnosed
SAMPLE_1183	TRIO_395	CHILD	agilentV4	HiSeq2000	100	diagnosed
SAMPLE_1186	TRIO_396	CHILD	agilentV4	HiSeq2000	100	diagnosed
SAMPLE_11878	TRIO_3960	CHILD	agilentV5	HiSeq4000	150	diagnosed
SAMPLE_11938	TRIO_3980	CHILD	agilentV5	HiSeq4000	150	diagnosed
SAMPLE_12004	TRIO_4002	CHILD	agilentV5	HiSeq4000	150	diagnosed
SAMPLE_12079	TRIO_4027	CHILD	agilentV5	HiSeq4000	150	diagnosed
SAMPLE_12142	TRIO_4048	CHILD	agilentV5	HiSeq4000	150	diagnosed
SAMPLE_12148	TRIO_4050	CHILD	agilentV5	HiSeq4000	150	diagnosed
SAMPLE_12151	TRIO_4051	CHILD	agilentV5	HiSeq4000	150	diagnosed
SAMPLE_12169	TRIO_4057	CHILD	agilentV5	HiSeq4000	150	diagnosed
SAMPLE_12214	TRIO_4072	CHILD	agilentV5	HiSeq4000	150	diagnosed
SAMPLE_1222	TRIO_408	CHILD	agilentV5	HiSeq4000	150	diagnosed
SAMPLE_12226	TRIO_4076	CHILD	agilentV5	HiSeq4000	150	diagnosed
SAMPLE_12244	TRIO_4082	CHILD	agilentV5	HiSeq4000	150	diagnosed
SAMPLE_1225	TRIO_409	CHILD	agilentV4	HiSeq2000	100	diagnosed
SAMPLE_12301	TRIO_4101	CHILD	agilentV5	HiSeq4000	150	diagnosed
SAMPLE_12307	TRIO_4103	CHILD	agilentV5	HiSeq4000	150	diagnosed
SAMPLE_12316	TRIO_4106	CHILD	agilentV5	HiSeq4000	150	diagnosed
SAMPLE_12331	TRIO_4111	CHILD	agilentV5	HiSeq4000	150	diagnosed
SAMPLE_12385	TRIO_4129	CHILD	agilentV5	HiSeq4000	150	diagnosed
SAMPLE_1240	TRIO_414	CHILD	agilentV5	HiSeq4000	150	diagnosed
SAMPLE_12415	TRIO_4139	CHILD	agilentV5	HiSeq4000	150	diagnosed
SAMPLE_1243	TRIO_415	CHILD	agilentV4	HiSeq2000	100	diagnosed
SAMPLE_12436	TRIO_4146	CHILD	agilentV5	HiSeq4000	150	diagnosed
SAMPLE_12439	TRIO_4147	CHILD	agilentV5	HiSeq4000	150	diagnosed
SAMPLE_1246	TRIO_416	CHILD	agilentV4	HiSeq2000	100	diagnosed
SAMPLE_12499	TRIO_4167	CHILD	agilentV5	HiSeq4000	150	diagnosed
SAMPLE_12502	TRIO_4168	CHILD	agilentV5	HiSeq4000	150	diagnosed
SAMPLE_12505	TRIO_4169	CHILD	agilentV5	HiSeq4000	150	diagnosed
SAMPLE_12535	TRIO_4179	CHILD	agilentV5	HiSeq4000	150	diagnosed
SAMPLE_12541	TRIO_4181	CHILD	agilentV5	HiSeq4000	150	diagnosed
SAMPLE_12568	TRIO_4190	CHILD	agilentV5	HiSeq4000	150	diagnosed
SAMPLE_12622	TRIO_4208	CHILD	agilentV5	HiSeq4000	150	diagnosed
SAMPLE_127	TRIO_43	CHILD	agilentV5	HiSeq4000	150	diagnosed
SAMPLE_12700	TRIO_4234	CHILD	agilentV5	HiSeq4000	150	diagnosed
SAMPLE_12709	TRIO_4237	CHILD	agilentV5	HiSeq4000	150	diagnosed
SAMPLE_1276	TRIO_426	CHILD	agilentV5	HiSeq4000	150	diagnosed
SAMPLE_12763	TRIO_4255	CHILD	agilentV5	HiSeq4000	150	diagnosed
SAMPLE_12769	TRIO_4257	CHILD	agilentV5	HiSeq4000	150	diagnosed
SAMPLE_12775	TRIO_4259	CHILD	agilentV5	HiSeq4000	150	diagnosed
SAMPLE_12796	TRIO_4266	CHILD	agilentV5	HiSeq4000	150	diagnosed
SAMPLE_12850	TRIO_4284	CHILD	agilentV5	HiSeq4000	150	diagnosed
SAMPLE_12865	TRIO_4289	CHILD	agilentV5	HiSeq4000	150	diagnosed
SAMPLE_12868	TRIO_4290	CHILD	agilentV5	HiSeq4000	150	diagnosed
SAMPLE_12898	TRIO_4300	CHILD	agilentV5	HiSeq4000	150	diagnosed
SAMPLE_1294	TRIO_432	CHILD	agilentV4	HiSeq2000	100	diagnosed
SAMPLE_12946	TRIO_4316	CHILD	agilentV5	HiSeq4000	150	diagnosed
SAMPLE_12958	TRIO_4320	CHILD	agilentV5	HiSeq4000	150	diagnosed
SAMPLE_12961	TRIO_4321	CHILD	agilentV5	HiSeq4000	150	diagnosed
SAMPLE_12964	TRIO_4322	CHILD	agilentV5	HiSeq4000	150	diagnosed
SAMPLE_13009	TRIO_4337	CHILD	agilentV5	HiSeq4000	150	diagnosed
SAMPLE_13021	TRIO_4341	CHILD	agilentV5	HiSeq4000	150	diagnosed
SAMPLE_13120	TRIO_4374	CHILD	agilentV5	HiSeq4000	150	diagnosed
SAMPLE_13129	TRIO_4377	CHILD	agilentV5	HiSeq4000	150	diagnosed
SAMPLE_13144	TRIO_4382	CHILD	agilentV5	HiSeq4000	150	diagnosed
SAMPLE_13183	TRIO_4395	CHILD	agilentV5	HiSeq4000	150	diagnosed
SAMPLE_13189	TRIO_4397	CHILD	agilentV5	HiSeq4000	150	diagnosed
SAMPLE_1321	TRIO_441	CHILD	agilentV4	HiSeq2000	100	diagnosed
SAMPLE_13234	TRIO_4412	CHILD	agilentV5	HiSeq4000	150	diagnosed
SAMPLE_13246	TRIO_4416	CHILD	agilentV5	HiSeq4000	150	diagnosed
SAMPLE_13393	TRIO_4465	CHILD	agilentV5	HiSeq4000	150	diagnosed
SAMPLE_13399	TRIO_4467	CHILD	agilentV5	HiSeq4000	150	diagnosed
SAMPLE_13402	TRIO_4468	CHILD	agilentV5	HiSeq4000	150	diagnosed
SAMPLE_13417	TRIO_4473	CHILD	agilentV5	HiSeq4000	150	diagnosed
SAMPLE_13429	TRIO_4477	CHILD	agilentV5	HiSeq4000	150	diagnosed
SAMPLE_1345	TRIO_449	CHILD	agilentV5	HiSeq4000	150	diagnosed
SAMPLE_13492	TRIO_4498	CHILD	agilentV5	DNBSEQ	100	diagnosed
SAMPLE_13573	TRIO_4525	CHILD	agilentV5	HiSeq4000	150	diagnosed
SAMPLE_13633	TRIO_4545	CHILD	agilentV5	HiSeq4000	150	diagnosed
SAMPLE_1369	TRIO_457	CHILD	agilentV4	HiSeq2000	100	diagnosed
SAMPLE_13708	TRIO_4570	CHILD	agilentV5	HiSeq4000	150	diagnosed
SAMPLE_13750	TRIO_4584	CHILD	agilentV5	HiSeq4000	150	diagnosed
SAMPLE_13813	TRIO_4605	CHILD	agilentV5	HiSeq4000	150	diagnosed
SAMPLE_1390	TRIO_464	CHILD	agilentV4	HiSeq2000	100	diagnosed
SAMPLE_13909	TRIO_4637	CHILD	agilentV5	HiSeq4000	150	diagnosed
SAMPLE_1396	TRIO_466	CHILD	agilentV5	HiSeq4000	150	diagnosed
SAMPLE_13963	TRIO_4655	CHILD	agilentV5	HiSeq4000	150	diagnosed
SAMPLE_1399	TRIO_467	CHILD	agilentV4	HiSeq2000	100	diagnosed
SAMPLE_1402	TRIO_468	CHILD	agilentV4	HiSeq2000	100	diagnosed
SAMPLE_1405	TRIO_469	CHILD	agilentV4	HiSeq2000	100	diagnosed
SAMPLE_14050	TRIO_4684	CHILD	agilentV5	HiSeq4000	150	diagnosed
SAMPLE_14065	TRIO_4689	CHILD	agilentV5	HiSeq4000	150	diagnosed
SAMPLE_14068	TRIO_4690	CHILD	agilentV5	HiSeq4000	150	diagnosed
SAMPLE_14107	TRIO_4703	CHILD	agilentV5	HiSeq4000	150	diagnosed
SAMPLE_14149	TRIO_4717	CHILD	agilentV5	HiSeq4000	150	diagnosed
SAMPLE_1417	TRIO_473	CHILD	agilentV5	HiSeq4000	150	diagnosed
SAMPLE_142	TRIO_48	CHILD	agilentV5	HiSeq4000	150	diagnosed
SAMPLE_14221	TRIO_4741	CHILD	agilentV5	HiSeq4000	150	diagnosed
SAMPLE_1423	TRIO_475	CHILD	agilentV4	HiSeq2000	100	diagnosed
SAMPLE_1429	TRIO_477	CHILD	agilentV4	HiSeq2000	100	diagnosed
SAMPLE_14305	TRIO_4769	CHILD	agilentV5	HiSeq4000	150	diagnosed
SAMPLE_14314	TRIO_4772	CHILD	agilentV5	HiSeq4000	150	diagnosed
SAMPLE_14386	TRIO_4796	CHILD	agilentV5	HiSeq4000	150	diagnosed
SAMPLE_14392	TRIO_4798	CHILD	agilentV5	HiSeq4000	150	diagnosed
SAMPLE_145	TRIO_49	CHILD	agilentV5	HiSeq4000	150	diagnosed
SAMPLE_14560	TRIO_4854	CHILD	agilentV5	HiSeq4000	150	diagnosed
SAMPLE_14563	TRIO_4855	CHILD	agilentV5	HiSeq4000	150	diagnosed
SAMPLE_14599	TRIO_4867	CHILD	agilentV5	HiSeq4000	150	diagnosed
SAMPLE_1462	TRIO_488	CHILD	agilentV4	HiSeq2000	100	diagnosed
SAMPLE_1465	TRIO_489	CHILD	agilentV4	HiSeq2000	100	diagnosed
SAMPLE_14653	TRIO_4885	CHILD	agilentV5	HiSeq4000	150	diagnosed
SAMPLE_14704	TRIO_4902	CHILD	agilentV5	HiSeq4000	150	diagnosed
SAMPLE_14770	TRIO_4924	CHILD	agilentV5	HiSeq4000	150	diagnosed
SAMPLE_14785	TRIO_4929	CHILD	agilentV5	HiSeq4000	150	diagnosed
SAMPLE_14842	TRIO_4948	CHILD	agilentV5	HiSeq4000	150	diagnosed
SAMPLE_14857	TRIO_4953	CHILD	agilentV5	HiSeq4000	150	diagnosed
SAMPLE_14860	TRIO_4954	CHILD	agilentV5	HiSeq4000	150	diagnosed
SAMPLE_14887	TRIO_4963	CHILD	agilentV5	HiSeq4000	150	diagnosed
SAMPLE_14899	TRIO_4967	CHILD	agilentV5	HiSeq4000	150	diagnosed
SAMPLE_14917	TRIO_4973	CHILD	agilentV5	HiSeq4000	150	diagnosed
SAMPLE_14923	TRIO_4975	CHILD	agilentV5	HiSeq4000	150	diagnosed
SAMPLE_14953	TRIO_4985	CHILD	agilentV5	HiSeq4000	150	diagnosed
SAMPLE_14968	TRIO_4990	CHILD	agilentV5	HiSeq4000	150	diagnosed
SAMPLE_15037	TRIO_5013	CHILD	agilentV5	HiSeq4000	150	diagnosed
SAMPLE_1507	TRIO_503	CHILD	agilentV5	HiSeq4000	150	diagnosed
SAMPLE_15079	TRIO_5027	CHILD	agilentV5	HiSeq4000	150	diagnosed
SAMPLE_15088	TRIO_5030	CHILD	agilentV5	HiSeq4000	150	diagnosed
SAMPLE_15100	TRIO_5034	CHILD	agilentV5	HiSeq4000	150	diagnosed
SAMPLE_15106	TRIO_5036	CHILD	agilentV5	HiSeq4000	150	diagnosed
SAMPLE_15148	TRIO_5050	CHILD	agilentV5	HiSeq4000	150	diagnosed
SAMPLE_1519	TRIO_507	CHILD	agilentV4	HiSeq2000	100	diagnosed
SAMPLE_15268	TRIO_5090	CHILD	agilentV5	HiSeq4000	150	diagnosed
SAMPLE_15277	TRIO_5093	CHILD	agilentV5	HiSeq4000	150	diagnosed
SAMPLE_15289	TRIO_5097	CHILD	agilentV5	HiSeq4000	150	diagnosed
SAMPLE_15298	TRIO_5100	CHILD	agilentV5	HiSeq4000	150	diagnosed
SAMPLE_15340	TRIO_5114	CHILD	agilentV5	HiSeq4000	150	diagnosed
SAMPLE_15361	TRIO_5121	CHILD	agilentV5	HiSeq4000	150	diagnosed
SAMPLE_1540	TRIO_514	CHILD	agilentV4	HiSeq2000	100	diagnosed
SAMPLE_15430	TRIO_5144	CHILD	agilentV5	HiSeq4000	150	diagnosed
SAMPLE_15472	TRIO_5158	CHILD	agilentV5	HiSeq4000	150	diagnosed
SAMPLE_15532	TRIO_5178	CHILD	agilentV5	HiSeq4000	150	diagnosed
SAMPLE_15592	TRIO_5198	CHILD	agilentV5	HiSeq4000	150	diagnosed
SAMPLE_15598	TRIO_5200	CHILD	agilentV5	HiSeq4000	150	diagnosed
SAMPLE_1561	TRIO_521	CHILD	agilentV5	HiSeq4000	150	diagnosed
SAMPLE_1564	TRIO_522	CHILD	agilentV4	HiSeq2000	100	diagnosed
SAMPLE_15682	TRIO_5228	CHILD	agilentV5	HiSeq4000	150	diagnosed
SAMPLE_15685	TRIO_5229	CHILD	agilentV5	HiSeq4000	150	diagnosed
SAMPLE_15751	TRIO_5251	CHILD	agilentV5	HiSeq4000	150	diagnosed
SAMPLE_15775	TRIO_5259	CHILD	agilentV5	HiSeq4000	150	diagnosed
SAMPLE_15802	TRIO_5268	CHILD	agilentV5	HiSeq4000	150	diagnosed
SAMPLE_15892	TRIO_5298	CHILD	agilentV5	HiSeq4000	150	diagnosed
SAMPLE_1591	TRIO_531	CHILD	agilentV4	HiSeq2000	100	diagnosed
SAMPLE_15979	TRIO_5327	CHILD	agilentV5	HiSeq4000	150	diagnosed
SAMPLE_16	TRIO_6	CHILD	agilentV4	HiSeq2000	100	diagnosed
SAMPLE_16126	TRIO_5376	CHILD	agilentV5	HiSeq4000	150	diagnosed
SAMPLE_16129	TRIO_5377	CHILD	agilentV5	HiSeq4000	150	diagnosed
SAMPLE_16132	TRIO_5378	CHILD	agilentV5	HiSeq4000	150	diagnosed
SAMPLE_16135	TRIO_5379	CHILD	agilentV5	HiSeq4000	150	diagnosed
SAMPLE_1624	TRIO_542	CHILD	agilentV4	HiSeq2000	100	diagnosed
SAMPLE_16270	TRIO_5424	CHILD	agilentV5	HiSeq4000	150	diagnosed
SAMPLE_16273	TRIO_5425	CHILD	agilentV5	HiSeq4000	150	diagnosed
SAMPLE_16282	TRIO_5428	CHILD	agilentV5	HiSeq4000	150	diagnosed
SAMPLE_163	TRIO_55	CHILD	agilentV5	HiSeq4000	150	diagnosed
SAMPLE_16339	TRIO_5447	CHILD	agilentV5	HiSeq4000	150	diagnosed
SAMPLE_16345	TRIO_5449	CHILD	agilentV5	HiSeq4000	150	diagnosed
SAMPLE_16357	TRIO_5453	CHILD	agilentV5	HiSeq4000	150	diagnosed
SAMPLE_16360	TRIO_5454	CHILD	agilentV5	HiSeq4000	150	diagnosed
SAMPLE_16378	TRIO_5460	CHILD	agilentV5	HiSeq4000	150	diagnosed
SAMPLE_1639	TRIO_547	CHILD	agilentV4	HiSeq2000	100	diagnosed
SAMPLE_16393	TRIO_5465	CHILD	agilentV5	HiSeq4000	150	diagnosed
SAMPLE_16399	TRIO_5467	CHILD	agilentV5	HiSeq4000	150	diagnosed
SAMPLE_16429	TRIO_5477	CHILD	agilentV5	HiSeq4000	150	diagnosed
SAMPLE_16438	TRIO_5480	CHILD	agilentV5	HiSeq4000	150	diagnosed
SAMPLE_16477	TRIO_5493	CHILD	agilentV5	HiSeq4000	150	diagnosed
SAMPLE_16480	TRIO_5494	CHILD	agilentV5	HiSeq4000	150	diagnosed
SAMPLE_16507	TRIO_5503	CHILD	agilentV5	HiSeq4000	150	diagnosed
SAMPLE_16537	TRIO_5513	CHILD	agilentV5	HiSeq4000	150	diagnosed
SAMPLE_16549	TRIO_5517	CHILD	agilentV5	HiSeq4000	150	diagnosed
SAMPLE_16564	TRIO_5522	CHILD	agilentV5	HiSeq4000	150	diagnosed
SAMPLE_16594	TRIO_5532	CHILD	agilentV5	HiSeq4000	150	diagnosed
SAMPLE_16696	TRIO_5566	CHILD	agilentV5	HiSeq4000	150	diagnosed
SAMPLE_16699	TRIO_5567	CHILD	agilentV5	HiSeq4000	150	diagnosed
SAMPLE_16726	TRIO_5576	CHILD	agilentV5	HiSeq4000	150	diagnosed
SAMPLE_16822	TRIO_5608	CHILD	agilentV5	HiSeq4000	150	diagnosed
SAMPLE_16825	TRIO_5609	CHILD	agilentV5	HiSeq4000	150	diagnosed
SAMPLE_16855	TRIO_5619	CHILD	agilentV5	HiSeq4000	150	diagnosed
SAMPLE_16888	TRIO_5630	CHILD	agilentV5	HiSeq4000	150	diagnosed
SAMPLE_16972	TRIO_5658	CHILD	agilentV5	HiSeq4000	150	diagnosed
SAMPLE_17014	TRIO_5672	CHILD	agilentV5	HiSeq4000	150	diagnosed
SAMPLE_17074	TRIO_5692	CHILD	agilentV5	HiSeq4000	150	diagnosed
SAMPLE_1708	TRIO_570	CHILD	agilentV4	HiSeq2000	100	diagnosed
SAMPLE_1714	TRIO_572	CHILD	agilentV4	HiSeq2000	100	diagnosed
SAMPLE_17179	TRIO_5727	CHILD	agilentV5	HiSeq4000	150	diagnosed
SAMPLE_17197	TRIO_5733	CHILD	agilentV5	HiSeq4000	150	diagnosed
SAMPLE_17206	TRIO_5736	CHILD	agilentV5	HiSeq4000	150	diagnosed
SAMPLE_1723	TRIO_575	CHILD	agilentV4	HiSeq2000	100	diagnosed
SAMPLE_17239	TRIO_5747	CHILD	agilentV5	HiSeq4000	150	diagnosed
SAMPLE_1729	TRIO_577	CHILD	agilentV5	HiSeq4000	150	diagnosed
SAMPLE_17314	TRIO_5772	CHILD	agilentV5	HiSeq4000	150	diagnosed
SAMPLE_17326	TRIO_5776	CHILD	agilentV5	HiSeq4000	150	diagnosed
SAMPLE_17332	TRIO_5778	CHILD	agilentV5	HiSeq4000	150	diagnosed
SAMPLE_1741	TRIO_581	CHILD	agilentV4	HiSeq2000	100	diagnosed
SAMPLE_1744	TRIO_582	CHILD	agilentV4	HiSeq2000	100	diagnosed
SAMPLE_17455	TRIO_5819	CHILD	agilentV5	HiSeq4000	150	diagnosed
SAMPLE_17464	TRIO_5822	CHILD	agilentV5	HiSeq4000	150	diagnosed
SAMPLE_17497	TRIO_5833	CHILD	agilentV5	HiSeq4000	150	diagnosed
SAMPLE_17506	TRIO_5836	CHILD	agilentV5	HiSeq4000	150	diagnosed
SAMPLE_17524	TRIO_5842	CHILD	agilentV5	HiSeq4000	150	diagnosed
SAMPLE_17527	TRIO_5843	CHILD	agilentV5	HiSeq4000	150	diagnosed
SAMPLE_17575	TRIO_5859	CHILD	agilentV5	HiSeq4000	150	diagnosed
SAMPLE_17605	TRIO_5869	CHILD	agilentV5	HiSeq4000	150	diagnosed
SAMPLE_17644	TRIO_5882	CHILD	agilentV5	HiSeq4000	150	diagnosed
SAMPLE_1768	TRIO_590	CHILD	agilentV4	HiSeq2000	100	diagnosed
SAMPLE_17710	TRIO_5904	CHILD	agilentV5	HiSeq4000	150	diagnosed
SAMPLE_17755	TRIO_5919	CHILD	agilentV5	HiSeq4000	150	diagnosed
SAMPLE_1777	TRIO_593	CHILD	agilentV4	HiSeq2000	100	diagnosed
SAMPLE_17833	TRIO_5945	CHILD	agilentV5	HiSeq4000	150	diagnosed
SAMPLE_17869	TRIO_5957	CHILD	agilentV5	HiSeq4000	150	diagnosed
SAMPLE_18007	TRIO_6003	CHILD	agilentV5	HiSeq4000	150	diagnosed
SAMPLE_18067	TRIO_6023	CHILD	agilentV5	HiSeq4000	150	diagnosed
SAMPLE_1807	TRIO_603	CHILD	agilentV5	HiSeq4000	150	diagnosed
SAMPLE_18094	TRIO_6032	CHILD	agilentV5	HiSeq4000	150	diagnosed
SAMPLE_18163	TRIO_6055	CHILD	agilentV5	HiSeq4000	150	diagnosed
SAMPLE_18250	TRIO_6084	CHILD	agilentV5	HiSeq4000	150	diagnosed
SAMPLE_18298	TRIO_6100	CHILD	agilentV5	HiSeq4000	150	diagnosed
SAMPLE_18301	TRIO_6101	CHILD	agilentV5	HiSeq4000	150	diagnosed
SAMPLE_18304	TRIO_6102	CHILD	agilentV5	HiSeq4000	150	diagnosed
SAMPLE_18307	TRIO_6103	CHILD	agilentV5	HiSeq4000	150	diagnosed
SAMPLE_18319	TRIO_6107	CHILD	agilentV5	HiSeq4000	150	diagnosed
SAMPLE_18415	TRIO_6139	CHILD	agilentV5	HiSeq4000	150	diagnosed
SAMPLE_18421	TRIO_6141	CHILD	agilentV5	HiSeq4000	150	diagnosed
SAMPLE_18430	TRIO_6144	CHILD	agilentV5	HiSeq4000	150	diagnosed
SAMPLE_18436	TRIO_6146	CHILD	agilentV5	HiSeq4000	150	diagnosed
SAMPLE_18475	TRIO_6159	CHILD	agilentV5	HiSeq4000	150	diagnosed
SAMPLE_18481	TRIO_6161	CHILD	agilentV5	HiSeq4000	150	diagnosed
SAMPLE_18487	TRIO_6163	CHILD	agilentV5	HiSeq4000	150	diagnosed
SAMPLE_18511	TRIO_6171	CHILD	agilentV5	HiSeq4000	150	diagnosed
SAMPLE_1852	TRIO_618	CHILD	agilentV4	HiSeq2000	100	diagnosed
SAMPLE_18571	TRIO_6191	CHILD	agilentV5	HiSeq4000	150	diagnosed
SAMPLE_18577	TRIO_6193	CHILD	agilentV5	HiSeq4000	150	diagnosed
SAMPLE_18631	TRIO_6211	CHILD	agilentV5	HiSeq4000	150	diagnosed
SAMPLE_18634	TRIO_6212	CHILD	agilentV5	HiSeq4000	150	diagnosed
SAMPLE_18637	TRIO_6213	CHILD	agilentV5	HiSeq4000	150	diagnosed
SAMPLE_18643	TRIO_6215	CHILD	agilentV5	HiSeq4000	150	diagnosed
SAMPLE_18664	TRIO_6222	CHILD	agilentV5	HiSeq4000	150	diagnosed
SAMPLE_18679	TRIO_6227	CHILD	agilentV5	HiSeq4000	150	diagnosed
SAMPLE_18682	TRIO_6228	CHILD	agilentV5	HiSeq4000	150	diagnosed
SAMPLE_18691	TRIO_6231	CHILD	agilentV5	HiSeq4000	150	diagnosed
SAMPLE_187	TRIO_63	CHILD	agilentV5	HiSeq4000	150	diagnosed
SAMPLE_1870	TRIO_624	CHILD	agilentV4	HiSeq2000	100	diagnosed
SAMPLE_18751	TRIO_6251	CHILD	agilentV5	HiSeq4000	150	diagnosed
SAMPLE_18781	TRIO_6261	CHILD	agilentV5	HiSeq4000	150	diagnosed
SAMPLE_18796	TRIO_6266	CHILD	agilentV5	HiSeq4000	150	diagnosed
SAMPLE_18808	TRIO_6270	CHILD	agilentV5	HiSeq4000	150	diagnosed
SAMPLE_18907	TRIO_6303	CHILD	agilentV5	HiSeq4000	150	diagnosed
SAMPLE_18913	TRIO_6305	CHILD	agilentV5	HiSeq4000	150	diagnosed
SAMPLE_18961	TRIO_6321	CHILD	agilentV5	HiSeq4000	150	diagnosed
SAMPLE_190	TRIO_64	CHILD	agilentV4	HiSeq2000	100	diagnosed
SAMPLE_19012	TRIO_6338	CHILD	agilentV5	HiSeq4000	150	diagnosed
SAMPLE_19069	TRIO_6357	CHILD	agilentV5	HiSeq4000	150	diagnosed
SAMPLE_1915	TRIO_639	CHILD	agilentV4	HiSeq2000	100	diagnosed
SAMPLE_19153	TRIO_6385	CHILD	agilentV5	HiSeq4000	150	diagnosed
SAMPLE_19192	TRIO_6398	CHILD	agilentV5	HiSeq4000	150	diagnosed
SAMPLE_19195	TRIO_6399	CHILD	agilentV5	HiSeq4000	150	diagnosed
SAMPLE_19222	TRIO_6408	CHILD	agilentV5	HiSeq4000	150	diagnosed
SAMPLE_19225	TRIO_6409	CHILD	agilentV5	HiSeq4000	150	diagnosed
SAMPLE_19291	TRIO_6431	CHILD	agilentV5	HiSeq4000	150	diagnosed
SAMPLE_19294	TRIO_6432	CHILD	agilentV5	HiSeq4000	150	diagnosed
SAMPLE_1930	TRIO_644	CHILD	agilentV4	HiSeq2000	100	diagnosed
SAMPLE_19300	TRIO_6434	CHILD	agilentV5	HiSeq4000	150	diagnosed
SAMPLE_1948	TRIO_650	CHILD	agilentV4	HiSeq2000	100	diagnosed
SAMPLE_19510	TRIO_6504	CHILD	agilentV5	HiSeq4000	150	diagnosed
SAMPLE_19534	TRIO_6512	CHILD	agilentV5	HiSeq4000	150	diagnosed
SAMPLE_19537	TRIO_6513	CHILD	agilentV5	HiSeq4000	150	diagnosed
SAMPLE_19600	TRIO_6534	CHILD	agilentV5	HiSeq4000	150	diagnosed
SAMPLE_19627	TRIO_6543	CHILD	agilentV5	HiSeq4000	150	diagnosed
SAMPLE_19666	TRIO_6556	CHILD	agilentV5	HiSeq4000	150	diagnosed
SAMPLE_19687	TRIO_6563	CHILD	agilentV5	HiSeq4000	150	diagnosed
SAMPLE_19693	TRIO_6565	CHILD	agilentV5	HiSeq4000	150	diagnosed
SAMPLE_19741	TRIO_6581	CHILD	agilentV5	HiSeq4000	150	diagnosed
SAMPLE_19759	TRIO_6587	CHILD	agilentV5	HiSeq4000	150	diagnosed
SAMPLE_19807	TRIO_6603	CHILD	agilentV5	HiSeq4000	150	diagnosed
SAMPLE_19813	TRIO_6605	CHILD	agilentV5	HiSeq4000	150	diagnosed
SAMPLE_19819	TRIO_6607	CHILD	agilentV5	HiSeq4000	150	diagnosed
SAMPLE_19843	TRIO_6615	CHILD	agilentV5	HiSeq4000	150	diagnosed
SAMPLE_19864	TRIO_6622	CHILD	agilentV5	HiSeq4000	150	diagnosed
SAMPLE_19894	TRIO_6632	CHILD	agilentV5	HiSeq4000	150	diagnosed
SAMPLE_1990	TRIO_664	CHILD	agilentV4	HiSeq2000	100	diagnosed
SAMPLE_19960	TRIO_6654	CHILD	agilentV5	HiSeq4000	150	diagnosed
SAMPLE_19972	TRIO_6658	CHILD	agilentV5	HiSeq4000	150	diagnosed
SAMPLE_19990	TRIO_6664	CHILD	agilentV5	HiSeq4000	150	diagnosed
SAMPLE_20008	TRIO_6670	CHILD	agilentV5	HiSeq4000	150	diagnosed
SAMPLE_20041	TRIO_6681	CHILD	agilentV5	HiSeq4000	150	diagnosed
SAMPLE_20047	TRIO_6683	CHILD	agilentV5	HiSeq4000	150	diagnosed
SAMPLE_20137	TRIO_6713	CHILD	agilentV5	HiSeq4000	150	diagnosed
SAMPLE_20143	TRIO_6715	CHILD	agilentV5	HiSeq4000	150	diagnosed
SAMPLE_20167	TRIO_6723	CHILD	agilentV5	HiSeq4000	150	diagnosed
SAMPLE_20251	TRIO_6751	CHILD	agilentV5	HiSeq4000	150	diagnosed
SAMPLE_20260	TRIO_6754	CHILD	agilentV5	HiSeq4000	150	diagnosed
SAMPLE_20269	TRIO_6757	CHILD	agilentV5	HiSeq4000	150	diagnosed
SAMPLE_20272	TRIO_6758	CHILD	agilentV5	HiSeq4000	150	diagnosed
SAMPLE_20314	TRIO_6772	CHILD	agilentV5	HiSeq4000	150	diagnosed
SAMPLE_20338	TRIO_6780	CHILD	agilentV5	HiSeq4000	150	diagnosed
SAMPLE_2041	TRIO_681	CHILD	agilentV4	HiSeq2000	100	diagnosed
SAMPLE_20413	TRIO_6805	CHILD	agilentV5	DNBSEQ	100	diagnosed
SAMPLE_20431	TRIO_6811	CHILD	agilentV5	DNBSEQ	100	diagnosed
SAMPLE_2044	TRIO_682	CHILD	agilentV4	HiSeq2000	100	diagnosed
SAMPLE_20443	TRIO_6815	CHILD	agilentV5	DNBSEQ	100	diagnosed
SAMPLE_20494	TRIO_6832	CHILD	agilentV5	DNBSEQ	100	diagnosed
SAMPLE_20497	TRIO_6833	CHILD	agilentV5	DNBSEQ	100	diagnosed
SAMPLE_2050	TRIO_684	CHILD	agilentV4	HiSeq2000	100	diagnosed
SAMPLE_20521	TRIO_6841	CHILD	agilentV5	DNBSEQ	100	diagnosed
SAMPLE_20566	TRIO_6856	CHILD	agilentV5	DNBSEQ	100	diagnosed
SAMPLE_2059	TRIO_687	CHILD	agilentV4	HiSeq2000	100	diagnosed
SAMPLE_2062	TRIO_688	CHILD	agilentV5	HiSeq4000	150	diagnosed
SAMPLE_20629	TRIO_6877	CHILD	agilentV5	DNBSEQ	100	diagnosed
SAMPLE_20632	TRIO_6878	CHILD	agilentV5	DNBSEQ	100	diagnosed
SAMPLE_20638	TRIO_6880	CHILD	agilentV5	DNBSEQ	100	diagnosed
SAMPLE_20647	TRIO_6883	CHILD	agilentV5	DNBSEQ	100	diagnosed
SAMPLE_2065	TRIO_689	CHILD	agilentV4	HiSeq2000	100	diagnosed
SAMPLE_20665	TRIO_6889	CHILD	agilentV5	DNBSEQ	100	diagnosed
SAMPLE_20671	TRIO_6891	CHILD	agilentV5	DNBSEQ	100	diagnosed
SAMPLE_2068	TRIO_690	CHILD	agilentV4	HiSeq2000	100	diagnosed
SAMPLE_20701	TRIO_6901	CHILD	agilentV5	DNBSEQ	100	diagnosed
SAMPLE_20719	TRIO_6907	CHILD	agilentV5	DNBSEQ	100	diagnosed
SAMPLE_20722	TRIO_6908	CHILD	agilentV5	DNBSEQ	100	diagnosed
SAMPLE_20725	TRIO_6909	CHILD	agilentV5	DNBSEQ	100	diagnosed
SAMPLE_20764	TRIO_6922	CHILD	agilentV5	DNBSEQ	100	diagnosed
SAMPLE_20788	TRIO_6930	CHILD	agilentV5	DNBSEQ	100	diagnosed
SAMPLE_20794	TRIO_6932	CHILD	agilentV5	DNBSEQ	100	diagnosed
SAMPLE_20803	TRIO_6935	CHILD	agilentV5	DNBSEQ	100	diagnosed
SAMPLE_20839	TRIO_6947	CHILD	agilentV5	DNBSEQ	100	diagnosed
SAMPLE_20845	TRIO_6949	CHILD	agilentV5	DNBSEQ	100	diagnosed
SAMPLE_20863	TRIO_6955	CHILD	agilentV5	DNBSEQ	100	diagnosed
SAMPLE_20896	TRIO_6966	CHILD	agilentV5	DNBSEQ	100	diagnosed
SAMPLE_20941	SINGLE_1	SINGLE	agilentV4	HiSeq2000	100	diagnosed
SAMPLE_20944	SINGLE_4	SINGLE	agilentV5	DNBSEQ	100	diagnosed
SAMPLE_20946	SINGLE_6	SINGLE	agilentV5	DNBSEQ	100	diagnosed
SAMPLE_20948	SINGLE_8	SINGLE	agilentV5	HiSeq4000	150	diagnosed
SAMPLE_2095	TRIO_699	CHILD	agilentV4	HiSeq2000	100	diagnosed
SAMPLE_20954	SINGLE_14	SINGLE	agilentV5	HiSeq4000	150	diagnosed
SAMPLE_20960	SINGLE_20	SINGLE	agilentV5	HiSeq4000	150	diagnosed
SAMPLE_20972	SINGLE_32	SINGLE	agilentV5	DNBSEQ	100	diagnosed
SAMPLE_20974	SINGLE_34	SINGLE	agilentV5	HiSeq4000	150	diagnosed
SAMPLE_20979	SINGLE_39	SINGLE	agilentV5	HiSeq4000	150	diagnosed
SAMPLE_2098	TRIO_700	CHILD	agilentV4	HiSeq2000	100	diagnosed
SAMPLE_20982	SINGLE_42	SINGLE	agilentV5	HiSeq4000	150	diagnosed
SAMPLE_20983	SINGLE_43	SINGLE	agilentV5	HiSeq4000	150	diagnosed
SAMPLE_20988	SINGLE_48	SINGLE	agilentV5	HiSeq4000	150	diagnosed
SAMPLE_20998	SINGLE_58	SINGLE	agilentV5	HiSeq4000	150	diagnosed
SAMPLE_20999	SINGLE_59	SINGLE	agilentV5	HiSeq4000	150	diagnosed
SAMPLE_21001	SINGLE_61	SINGLE	agilentV5	HiSeq4000	150	diagnosed
SAMPLE_21004	SINGLE_64	SINGLE	agilentV4	HiSeq2000	100	diagnosed
SAMPLE_21005	SINGLE_65	SINGLE	agilentV4	HiSeq2000	100	diagnosed
SAMPLE_21007	SINGLE_67	SINGLE	agilentV5	HiSeq4000	150	diagnosed
SAMPLE_21008	SINGLE_68	SINGLE	agilentV5	HiSeq4000	150	diagnosed
SAMPLE_21020	SINGLE_80	SINGLE	agilentV5	HiSeq4000	150	diagnosed
SAMPLE_21023	SINGLE_83	SINGLE	agilentV4	HiSeq2000	100	diagnosed
SAMPLE_21030	SINGLE_90	SINGLE	agilentV5	HiSeq2000	100	diagnosed
SAMPLE_21033	SINGLE_93	SINGLE	agilentV4	HiSeq2000	100	diagnosed
SAMPLE_21037	SINGLE_97	SINGLE	agilentV4	HiSeq2000	100	diagnosed
SAMPLE_21046	SINGLE_106	SINGLE	agilentV5	HiSeq4000	150	diagnosed
SAMPLE_21048	SINGLE_108	SINGLE	agilentV5	HiSeq4000	150	diagnosed
SAMPLE_21061	SINGLE_121	SINGLE	agilentV4	HiSeq2000	100	diagnosed
SAMPLE_21065	SINGLE_125	SINGLE	agilentV5	HiSeq4000	150	diagnosed
SAMPLE_21066	SINGLE_126	SINGLE	agilentV5	HiSeq4000	150	diagnosed
SAMPLE_21067	SINGLE_127	SINGLE	agilentV5	HiSeq4000	150	diagnosed
SAMPLE_2107	TRIO_703	CHILD	agilentV4	HiSeq2000	100	diagnosed
SAMPLE_21074	SINGLE_134	SINGLE	agilentV5	HiSeq4000	150	diagnosed
SAMPLE_21075	SINGLE_135	SINGLE	agilentV4	HiSeq2000	100	diagnosed
SAMPLE_21081	SINGLE_141	SINGLE	agilentV4	HiSeq2000	100	diagnosed
SAMPLE_21113	SINGLE_173	SINGLE	agilentV5	HiSeq4000	150	diagnosed
SAMPLE_21127	SINGLE_187	SINGLE	agilentV4	HiSeq2000	100	diagnosed
SAMPLE_21132	SINGLE_192	SINGLE	agilentV5	HiSeq4000	150	diagnosed
SAMPLE_21134	SINGLE_194	SINGLE	agilentV5	HiSeq4000	150	diagnosed
SAMPLE_21150	SINGLE_210	SINGLE	agilentV5	HiSeq4000	150	diagnosed
SAMPLE_21157	SINGLE_217	SINGLE	agilentV4	HiSeq2000	100	diagnosed
SAMPLE_21162	SINGLE_222	SINGLE	agilentV4	HiSeq2000	100	diagnosed
SAMPLE_21164	SINGLE_224	SINGLE	agilentV5	HiSeq2000	100	diagnosed
SAMPLE_21165	SINGLE_225	SINGLE	agilentV4	HiSeq2000	100	diagnosed
SAMPLE_21174	SINGLE_234	SINGLE	agilentV4	HiSeq2000	100	diagnosed
SAMPLE_21176	SINGLE_236	SINGLE	agilentV5	HiSeq4000	150	diagnosed
SAMPLE_21189	SINGLE_249	SINGLE	agilentV5	HiSeq4000	150	diagnosed
SAMPLE_21194	SINGLE_254	SINGLE	agilentV4	HiSeq2000	100	diagnosed
SAMPLE_21195	SINGLE_255	SINGLE	agilentV5	HiSeq4000	150	diagnosed
SAMPLE_21198	SINGLE_258	SINGLE	agilentV4	HiSeq2000	100	diagnosed
SAMPLE_21214	SINGLE_274	SINGLE	agilentV5	HiSeq4000	150	diagnosed
SAMPLE_21224	SINGLE_284	SINGLE	agilentV5	HiSeq4000	150	diagnosed
SAMPLE_21232	SINGLE_292	SINGLE	agilentV4	HiSeq2000	100	diagnosed
SAMPLE_21234	SINGLE_294	SINGLE	agilentV4	HiSeq2000	100	diagnosed
SAMPLE_21236	SINGLE_296	SINGLE	agilentV5	HiSeq4000	150	diagnosed
SAMPLE_21243	SINGLE_303	SINGLE	agilentV5	HiSeq4000	150	diagnosed
SAMPLE_21253	SINGLE_313	SINGLE	agilentV4	HiSeq2000	100	diagnosed
SAMPLE_21257	SINGLE_317	SINGLE	agilentV5	HiSeq4000	150	diagnosed
SAMPLE_21262	SINGLE_322	SINGLE	agilentV4	HiSeq2000	100	diagnosed
SAMPLE_21265	SINGLE_325	SINGLE	agilentV5	HiSeq2000	100	diagnosed
SAMPLE_21266	SINGLE_326	SINGLE	agilentV4	HiSeq2000	100	diagnosed
SAMPLE_21273	SINGLE_333	SINGLE	agilentV5	HiSeq4000	150	diagnosed
SAMPLE_21301	SINGLE_361	SINGLE	agilentV5	HiSeq2000	100	diagnosed
SAMPLE_21311	SINGLE_371	SINGLE	agilentV5	HiSeq4000	150	diagnosed
SAMPLE_21313	SINGLE_373	SINGLE	agilentV5	HiSeq4000	150	diagnosed
SAMPLE_21315	SINGLE_375	SINGLE	agilentV4	HiSeq2000	100	diagnosed
SAMPLE_21325	SINGLE_385	SINGLE	agilentV4	HiSeq2000	100	diagnosed
SAMPLE_21328	SINGLE_388	SINGLE	agilentV5	HiSeq4000	150	diagnosed
SAMPLE_21329	SINGLE_389	SINGLE	agilentV5	HiSeq4000	150	diagnosed
SAMPLE_21337	SINGLE_397	SINGLE	agilentV5	HiSeq4000	150	diagnosed
SAMPLE_21339	SINGLE_399	SINGLE	agilentV5	HiSeq4000	150	diagnosed
SAMPLE_21341	SINGLE_401	SINGLE	agilentV4	HiSeq2000	100	diagnosed
SAMPLE_21345	SINGLE_405	SINGLE	agilentV4	HiSeq2000	100	diagnosed
SAMPLE_21346	SINGLE_406	SINGLE	agilentV5	DNBSEQ	100	diagnosed
SAMPLE_21349	SINGLE_409	SINGLE	agilentV4	HiSeq2000	100	diagnosed
SAMPLE_21352	SINGLE_412	SINGLE	agilentV5	HiSeq4000	150	diagnosed
SAMPLE_21361	SINGLE_421	SINGLE	agilentV4	HiSeq2000	100	diagnosed
SAMPLE_21374	SINGLE_434	SINGLE	agilentV5	HiSeq4000	150	diagnosed
SAMPLE_21375	SINGLE_435	SINGLE	agilentV5	HiSeq4000	150	diagnosed
SAMPLE_21378	SINGLE_438	SINGLE	agilentV4	HiSeq2000	100	diagnosed
SAMPLE_21382	SINGLE_442	SINGLE	agilentV5	HiSeq4000	150	diagnosed
SAMPLE_21398	SINGLE_458	SINGLE	agilentV4	HiSeq2000	100	diagnosed
SAMPLE_21401	SINGLE_461	SINGLE	agilentV5	HiSeq4000	150	diagnosed
SAMPLE_21419	SINGLE_479	SINGLE	agilentV4	HiSeq2000	100	diagnosed
SAMPLE_21421	SINGLE_481	SINGLE	agilentV4	HiSeq2000	100	diagnosed
SAMPLE_2143	TRIO_715	CHILD	agilentV4	HiSeq2000	100	diagnosed
SAMPLE_21430	SINGLE_490	SINGLE	agilentV5	HiSeq4000	150	diagnosed
SAMPLE_21441	SINGLE_501	SINGLE	agilentV5	HiSeq2000	100	diagnosed
SAMPLE_21459	SINGLE_519	SINGLE	agilentV4	HiSeq2000	100	diagnosed
SAMPLE_21460	SINGLE_520	SINGLE	agilentV4	HiSeq2000	100	diagnosed
SAMPLE_21461	SINGLE_521	SINGLE	agilentV4	HiSeq2000	100	diagnosed
SAMPLE_21471	SINGLE_531	SINGLE	agilentV5	HiSeq4000	150	diagnosed
SAMPLE_21472	SINGLE_532	SINGLE	agilentV5	HiSeq2000	100	diagnosed
SAMPLE_21481	SINGLE_541	SINGLE	agilentV4	HiSeq2000	100	diagnosed
SAMPLE_21495	SINGLE_555	SINGLE	agilentV4	HiSeq2000	100	diagnosed
SAMPLE_21497	SINGLE_557	SINGLE	agilentV5	HiSeq4000	150	diagnosed
SAMPLE_21499	SINGLE_559	SINGLE	agilentV4	HiSeq2000	100	diagnosed
SAMPLE_21503	SINGLE_563	SINGLE	agilentV4	HiSeq2000	100	diagnosed
SAMPLE_21508	SINGLE_568	SINGLE	agilentV5	HiSeq4000	150	diagnosed
SAMPLE_21516	SINGLE_576	SINGLE	agilentV5	HiSeq4000	150	diagnosed
SAMPLE_2152	TRIO_718	CHILD	agilentV4	HiSeq2000	100	diagnosed
SAMPLE_21538	SINGLE_598	SINGLE	agilentV5	HiSeq4000	150	diagnosed
SAMPLE_21540	SINGLE_600	SINGLE	agilentV4	HiSeq2000	100	diagnosed
SAMPLE_21549	SINGLE_609	SINGLE	agilentV4	HiSeq2000	100	diagnosed
SAMPLE_21558	SINGLE_618	SINGLE	agilentV4	HiSeq2000	100	diagnosed
SAMPLE_21561	SINGLE_621	SINGLE	agilentV5	HiSeq4000	150	diagnosed
SAMPLE_21566	SINGLE_626	SINGLE	agilentV4	HiSeq2000	100	diagnosed
SAMPLE_21568	SINGLE_628	SINGLE	agilentV5	DNBSEQ	100	diagnosed
SAMPLE_21570	SINGLE_630	SINGLE	agilentV4	HiSeq2000	100	diagnosed
SAMPLE_21576	SINGLE_636	SINGLE	agilentV4	HiSeq2000	100	diagnosed
SAMPLE_21581	SINGLE_641	SINGLE	agilentV5	HiSeq2000	100	diagnosed
SAMPLE_21584	SINGLE_644	SINGLE	agilentV4	HiSeq2000	100	diagnosed
SAMPLE_21586	SINGLE_646	SINGLE	agilentV5	HiSeq4000	150	diagnosed
SAMPLE_21596	SINGLE_656	SINGLE	agilentV5	HiSeq2000	100	diagnosed
SAMPLE_21601	SINGLE_661	SINGLE	agilentV4	HiSeq2000	100	diagnosed
SAMPLE_21603	SINGLE_663	SINGLE	agilentV4	HiSeq2000	100	diagnosed
SAMPLE_21608	SINGLE_668	SINGLE	agilentV4	HiSeq2000	100	diagnosed
SAMPLE_2161	TRIO_721	CHILD	agilentV4	HiSeq2000	100	diagnosed
SAMPLE_21616	SINGLE_676	SINGLE	agilentV4	HiSeq2000	100	diagnosed
SAMPLE_21625	SINGLE_685	SINGLE	agilentV4	HiSeq2000	100	diagnosed
SAMPLE_21636	SINGLE_696	SINGLE	agilentV4	HiSeq2000	100	diagnosed
SAMPLE_21660	SINGLE_720	SINGLE	agilentV5	HiSeq4000	150	diagnosed
SAMPLE_21663	SINGLE_723	SINGLE	agilentV4	HiSeq2000	100	diagnosed
SAMPLE_21669	SINGLE_729	SINGLE	agilentV4	HiSeq2000	100	diagnosed
SAMPLE_21672	SINGLE_732	SINGLE	agilentV4	HiSeq2000	100	diagnosed
SAMPLE_21679	SINGLE_739	SINGLE	agilentV5	HiSeq2000	100	diagnosed
SAMPLE_21690	SINGLE_750	SINGLE	agilentV4	HiSeq2000	100	diagnosed
SAMPLE_21691	SINGLE_751	SINGLE	agilentV4	HiSeq2000	100	diagnosed
SAMPLE_21692	SINGLE_752	SINGLE	agilentV4	HiSeq2000	100	diagnosed
SAMPLE_21695	SINGLE_755	SINGLE	agilentV4	HiSeq2000	100	diagnosed
SAMPLE_21696	SINGLE_756	SINGLE	agilentV4	HiSeq2000	100	diagnosed
SAMPLE_21702	SINGLE_762	SINGLE	agilentV5	HiSeq2000	100	diagnosed
SAMPLE_21704	SINGLE_764	SINGLE	agilentV4	HiSeq2000	100	diagnosed
SAMPLE_21705	SINGLE_765	SINGLE	agilentV4	HiSeq2000	100	diagnosed
SAMPLE_21710	SINGLE_770	SINGLE	agilentV4	HiSeq2000	100	diagnosed
SAMPLE_21725	SINGLE_785	SINGLE	agilentV4	HiSeq2000	100	diagnosed
SAMPLE_21740	SINGLE_800	SINGLE	agilentV4	HiSeq2000	100	diagnosed
SAMPLE_21741	SINGLE_801	SINGLE	agilentV4	HiSeq2000	100	diagnosed
SAMPLE_21754	SINGLE_814	SINGLE	agilentV4	HiSeq2000	100	diagnosed
SAMPLE_21755	SINGLE_815	SINGLE	agilentV4	HiSeq2000	100	diagnosed
SAMPLE_21757	SINGLE_817	SINGLE	agilentV4	HiSeq2000	100	diagnosed
SAMPLE_21758	SINGLE_818	SINGLE	agilentV4	HiSeq2000	100	diagnosed
SAMPLE_21777	SINGLE_837	SINGLE	agilentV4	HiSeq2000	100	diagnosed
SAMPLE_21778	SINGLE_838	SINGLE	agilentV4	HiSeq2000	100	diagnosed
SAMPLE_21779	SINGLE_839	SINGLE	agilentV5	HiSeq4000	150	diagnosed
SAMPLE_21781	SINGLE_841	SINGLE	agilentV4	HiSeq2000	100	diagnosed
SAMPLE_21789	SINGLE_849	SINGLE	agilentV4	HiSeq2000	100	diagnosed
SAMPLE_21792	SINGLE_852	SINGLE	agilentV5	HiSeq4000	150	diagnosed
SAMPLE_21800	SINGLE_860	SINGLE	agilentV5	HiSeq4000	150	diagnosed
SAMPLE_21801	SINGLE_861	SINGLE	agilentV4	HiSeq2000	100	diagnosed
SAMPLE_21808	SINGLE_868	SINGLE	agilentV4	HiSeq2000	100	diagnosed
SAMPLE_21811	SINGLE_871	SINGLE	agilentV4	HiSeq2000	100	diagnosed
SAMPLE_21814	SINGLE_874	SINGLE	agilentV4	HiSeq2000	100	diagnosed
SAMPLE_21816	SINGLE_876	SINGLE	agilentV4	HiSeq2000	100	diagnosed
SAMPLE_21817	SINGLE_877	SINGLE	agilentV4	HiSeq2000	100	diagnosed
SAMPLE_21821	SINGLE_881	SINGLE	agilentV4	HiSeq2000	100	diagnosed
SAMPLE_21822	SINGLE_882	SINGLE	agilentV4	HiSeq2000	100	diagnosed
SAMPLE_21835	SINGLE_895	SINGLE	agilentV4	HiSeq2000	100	diagnosed
SAMPLE_21844	SINGLE_904	SINGLE	agilentV5	HiSeq4000	150	diagnosed
SAMPLE_21845	SINGLE_905	SINGLE	agilentV4	HiSeq2000	100	diagnosed
SAMPLE_21855	SINGLE_915	SINGLE	agilentV4	HiSeq2000	100	diagnosed
SAMPLE_21859	SINGLE_919	SINGLE	agilentV4	HiSeq2000	100	diagnosed
SAMPLE_21873	SINGLE_933	SINGLE	agilentV4	HiSeq2000	100	diagnosed
SAMPLE_21874	SINGLE_934	SINGLE	agilentV4	HiSeq2000	100	diagnosed
SAMPLE_21886	SINGLE_946	SINGLE	agilentV4	HiSeq2000	100	diagnosed
SAMPLE_21900	SINGLE_960	SINGLE	agilentV4	HiSeq2000	100	diagnosed
SAMPLE_21904	SINGLE_964	SINGLE	agilentV4	HiSeq2000	100	diagnosed
SAMPLE_21914	SINGLE_974	SINGLE	agilentV4	HiSeq2000	100	diagnosed
SAMPLE_21917	SINGLE_977	SINGLE	agilentV4	HiSeq2000	100	diagnosed
SAMPLE_21919	SINGLE_979	SINGLE	agilentV4	HiSeq2000	100	diagnosed
SAMPLE_21932	SINGLE_992	SINGLE	agilentV4	HiSeq2000	100	diagnosed
SAMPLE_21933	SINGLE_993	SINGLE	agilentV4	HiSeq2000	100	diagnosed
SAMPLE_21941	SINGLE_1001	SINGLE	agilentV4	HiSeq2000	100	diagnosed
SAMPLE_21942	SINGLE_1002	SINGLE	agilentV4	HiSeq2000	100	diagnosed
SAMPLE_21949	SINGLE_1009	SINGLE	agilentV4	HiSeq2000	100	diagnosed
SAMPLE_21956	SINGLE_1016	SINGLE	agilentV4	HiSeq2000	100	diagnosed
SAMPLE_21968	SINGLE_1028	SINGLE	agilentV4	HiSeq2000	100	diagnosed
SAMPLE_21971	SINGLE_1031	SINGLE	agilentV4	HiSeq2000	100	diagnosed
SAMPLE_21974	SINGLE_1034	SINGLE	agilentV4	HiSeq2000	100	diagnosed
SAMPLE_21975	SINGLE_1035	SINGLE	agilentV4	HiSeq2000	100	diagnosed
SAMPLE_21978	SINGLE_1038	SINGLE	agilentV4	HiSeq2000	100	diagnosed
SAMPLE_21981	SINGLE_1041	SINGLE	agilentV4	HiSeq2000	100	diagnosed
SAMPLE_21989	SINGLE_1049	SINGLE	agilentV4	HiSeq2000	100	diagnosed
SAMPLE_22	TRIO_8	CHILD	agilentV5	HiSeq4000	150	diagnosed
SAMPLE_22001	SINGLE_1061	SINGLE	agilentV4	HiSeq2000	100	diagnosed
SAMPLE_22007	SINGLE_1067	SINGLE	agilentV4	HiSeq2000	100	diagnosed
SAMPLE_22010	SINGLE_1070	SINGLE	agilentV4	HiSeq2000	100	diagnosed
SAMPLE_22019	SINGLE_1079	SINGLE	agilentV4	HiSeq2000	100	diagnosed
SAMPLE_2203	TRIO_735	CHILD	agilentV4	HiSeq2000	100	diagnosed
SAMPLE_22034	SINGLE_1094	SINGLE	agilentV4	HiSeq2000	100	diagnosed
SAMPLE_22035	SINGLE_1095	SINGLE	agilentV4	HiSeq2000	100	diagnosed
SAMPLE_22036	SINGLE_1096	SINGLE	agilentV4	HiSeq2000	100	diagnosed
SAMPLE_22037	SINGLE_1097	SINGLE	agilentV4	HiSeq2000	100	diagnosed
SAMPLE_22039	SINGLE_1099	SINGLE	agilentV4	HiSeq2000	100	diagnosed
SAMPLE_22041	SINGLE_1101	SINGLE	agilentV4	HiSeq2000	100	diagnosed
SAMPLE_22042	SINGLE_1102	SINGLE	agilentV4	HiSeq2000	100	diagnosed
SAMPLE_22046	SINGLE_1106	SINGLE	agilentV4	HiSeq2000	100	diagnosed
SAMPLE_22047	SINGLE_1107	SINGLE	agilentV4	HiSeq2000	100	diagnosed
SAMPLE_22060	SINGLE_1120	SINGLE	agilentV5	HiSeq4000	150	diagnosed
SAMPLE_22064	SINGLE_1124	SINGLE	agilentV4	HiSeq2000	100	diagnosed
SAMPLE_22067	SINGLE_1127	SINGLE	agilentV4	HiSeq2000	100	diagnosed
SAMPLE_22073	SINGLE_1133	SINGLE	agilentV5	HiSeq4000	150	diagnosed
SAMPLE_22078	SINGLE_1138	SINGLE	agilentV4	HiSeq2000	100	diagnosed
SAMPLE_22079	SINGLE_1139	SINGLE	agilentV4	HiSeq2000	100	diagnosed
SAMPLE_22080	SINGLE_1140	SINGLE	agilentV5	HiSeq4000	150	diagnosed
SAMPLE_22082	SINGLE_1142	SINGLE	agilentV4	HiSeq2000	100	diagnosed
SAMPLE_22088	SINGLE_1148	SINGLE	agilentV4	HiSeq2000	100	diagnosed
SAMPLE_22090	SINGLE_1150	SINGLE	agilentV4	HiSeq2000	100	diagnosed
SAMPLE_22093	SINGLE_1153	SINGLE	agilentV4	HiSeq2000	100	diagnosed
SAMPLE_22102	SINGLE_1162	SINGLE	agilentV4	HiSeq2000	100	diagnosed
SAMPLE_22107	SINGLE_1167	SINGLE	agilentV4	HiSeq2000	100	diagnosed
SAMPLE_22120	SINGLE_1180	SINGLE	agilentV4	HiSeq2000	100	diagnosed
SAMPLE_22122	SINGLE_1182	SINGLE	agilentV4	HiSeq2000	100	diagnosed
SAMPLE_22124	SINGLE_1184	SINGLE	agilentV5	HiSeq4000	150	diagnosed
SAMPLE_22128	SINGLE_1188	SINGLE	agilentV4	HiSeq2000	100	diagnosed
SAMPLE_22140	SINGLE_1200	SINGLE	agilentV4	HiSeq2000	100	diagnosed
SAMPLE_22147	SINGLE_1207	SINGLE	agilentV4	HiSeq2000	100	diagnosed
SAMPLE_22149	SINGLE_1209	SINGLE	agilentV4	HiSeq2000	100	diagnosed
SAMPLE_22158	SINGLE_1218	SINGLE	agilentV4	HiSeq2000	100	diagnosed
SAMPLE_22166	SINGLE_1226	SINGLE	agilentV4	HiSeq2000	100	diagnosed
SAMPLE_22175	SINGLE_1235	SINGLE	agilentV5	HiSeq4000	150	diagnosed
SAMPLE_22178	SINGLE_1238	SINGLE	agilentV4	HiSeq2000	100	diagnosed
SAMPLE_22179	SINGLE_1239	SINGLE	agilentV4	HiSeq2000	100	diagnosed
SAMPLE_22180	SINGLE_1240	SINGLE	agilentV4	HiSeq2000	100	diagnosed
SAMPLE_22182	SINGLE_1242	SINGLE	agilentV4	HiSeq2000	100	diagnosed
SAMPLE_22189	SINGLE_1249	SINGLE	agilentV4	HiSeq2000	100	diagnosed
SAMPLE_22191	SINGLE_1251	SINGLE	agilentV4	HiSeq2000	100	diagnosed
SAMPLE_22193	SINGLE_1253	SINGLE	agilentV4	HiSeq2000	100	diagnosed
SAMPLE_22205	SINGLE_1265	SINGLE	agilentV4	HiSeq2000	100	diagnosed
SAMPLE_22208	SINGLE_1268	SINGLE	agilentV4	HiSeq2000	100	diagnosed
SAMPLE_22217	SINGLE_1277	SINGLE	agilentV4	HiSeq2000	100	diagnosed
SAMPLE_22228	SINGLE_1288	SINGLE	agilentV4	HiSeq2000	100	diagnosed
SAMPLE_22234	SINGLE_1294	SINGLE	agilentV4	HiSeq2000	100	diagnosed
SAMPLE_2224	TRIO_742	CHILD	agilentV4	HiSeq2000	100	diagnosed
SAMPLE_22244	SINGLE_1304	SINGLE	agilentV4	HiSeq2000	100	diagnosed
SAMPLE_22247	SINGLE_1307	SINGLE	agilentV4	HiSeq2000	100	diagnosed
SAMPLE_22250	SINGLE_1310	SINGLE	agilentV4	HiSeq2000	100	diagnosed
SAMPLE_22252	SINGLE_1312	SINGLE	agilentV4	HiSeq2000	100	diagnosed
SAMPLE_22253	SINGLE_1313	SINGLE	agilentV4	HiSeq2000	100	diagnosed
SAMPLE_22256	SINGLE_1316	SINGLE	agilentV4	HiSeq2000	100	diagnosed
SAMPLE_22264	SINGLE_1324	SINGLE	agilentV4	HiSeq2000	100	diagnosed
SAMPLE_22265	SINGLE_1325	SINGLE	agilentV4	HiSeq2000	100	diagnosed
SAMPLE_2227	TRIO_743	CHILD	agilentV4	HiSeq2000	100	diagnosed
SAMPLE_22283	SINGLE_1343	SINGLE	agilentV4	HiSeq2000	100	diagnosed
SAMPLE_22285	SINGLE_1345	SINGLE	agilentV4	HiSeq2000	100	diagnosed
SAMPLE_22286	SINGLE_1346	SINGLE	agilentV4	HiSeq2000	100	diagnosed
SAMPLE_22289	SINGLE_1349	SINGLE	agilentV4	HiSeq2000	100	diagnosed
SAMPLE_22295	SINGLE_1355	SINGLE	agilentV4	HiSeq2000	100	diagnosed
SAMPLE_22297	SINGLE_1357	SINGLE	agilentV4	HiSeq2000	100	diagnosed
SAMPLE_22299	SINGLE_1359	SINGLE	agilentV4	HiSeq2000	100	diagnosed
SAMPLE_223	TRIO_75	CHILD	agilentV4	HiSeq2000	100	diagnosed
SAMPLE_2230	TRIO_744	CHILD	agilentV4	HiSeq2000	100	diagnosed
SAMPLE_22301	SINGLE_1361	SINGLE	agilentV4	HiSeq2000	100	diagnosed
SAMPLE_22302	SINGLE_1362	SINGLE	agilentV4	HiSeq2000	100	diagnosed
SAMPLE_22307	SINGLE_1367	SINGLE	agilentV4	HiSeq2000	100	diagnosed
SAMPLE_22308	SINGLE_1368	SINGLE	agilentV4	HiSeq2000	100	diagnosed
SAMPLE_22312	SINGLE_1372	SINGLE	agilentV4	HiSeq2000	100	diagnosed
SAMPLE_22315	SINGLE_1375	SINGLE	agilentV5	HiSeq2000	100	diagnosed
SAMPLE_22320	SINGLE_1380	SINGLE	agilentV4	HiSeq2000	100	diagnosed
SAMPLE_22330	SINGLE_1390	SINGLE	agilentV4	HiSeq2000	100	diagnosed
SAMPLE_22338	SINGLE_1398	SINGLE	agilentV4	HiSeq2000	100	diagnosed
SAMPLE_22342	SINGLE_1402	SINGLE	agilentV4	HiSeq2000	100	diagnosed
SAMPLE_22349	SINGLE_1409	SINGLE	agilentV4	HiSeq2000	100	diagnosed
SAMPLE_22358	SINGLE_1418	SINGLE	agilentV4	HiSeq2000	100	diagnosed
SAMPLE_2236	TRIO_746	CHILD	agilentV4	HiSeq2000	100	diagnosed
SAMPLE_22361	SINGLE_1421	SINGLE	agilentV4	HiSeq2000	100	diagnosed
SAMPLE_22364	SINGLE_1424	SINGLE	agilentV4	HiSeq2000	100	diagnosed
SAMPLE_22367	SINGLE_1427	SINGLE	agilentV4	HiSeq2000	100	diagnosed
SAMPLE_22369	SINGLE_1429	SINGLE	agilentV4	HiSeq2000	100	diagnosed
SAMPLE_22385	SINGLE_1445	SINGLE	agilentV4	HiSeq2000	100	diagnosed
SAMPLE_22391	SINGLE_1451	SINGLE	agilentV4	HiSeq2000	100	diagnosed
SAMPLE_22392	SINGLE_1452	SINGLE	agilentV4	HiSeq2000	100	diagnosed
SAMPLE_22401	SINGLE_1461	SINGLE	agilentV4	HiSeq2000	100	diagnosed
SAMPLE_22409	SINGLE_1469	SINGLE	agilentV4	HiSeq2000	100	diagnosed
SAMPLE_22410	SINGLE_1470	SINGLE	agilentV4	HiSeq2000	100	diagnosed
SAMPLE_22411	SINGLE_1471	SINGLE	agilentV4	HiSeq2000	100	diagnosed
SAMPLE_22417	SINGLE_1477	SINGLE	agilentV4	HiSeq2000	100	diagnosed
SAMPLE_22423	SINGLE_1483	SINGLE	agilentV5	HiSeq4000	150	diagnosed
SAMPLE_22425	SINGLE_1485	SINGLE	agilentV4	HiSeq2000	100	diagnosed
SAMPLE_22426	SINGLE_1486	SINGLE	agilentV4	HiSeq2000	100	diagnosed
SAMPLE_22427	SINGLE_1487	SINGLE	agilentV4	HiSeq2000	100	diagnosed
SAMPLE_22440	SINGLE_1500	SINGLE	agilentV4	HiSeq2000	100	diagnosed
SAMPLE_22445	SINGLE_1505	SINGLE	agilentV4	HiSeq2000	100	diagnosed
SAMPLE_22449	SINGLE_1509	SINGLE	agilentV5	HiSeq4000	150	diagnosed
SAMPLE_2245	TRIO_749	CHILD	agilentV4	HiSeq2000	100	diagnosed
SAMPLE_22450	SINGLE_1510	SINGLE	agilentV4	HiSeq2000	100	diagnosed
SAMPLE_22453	SINGLE_1513	SINGLE	agilentV4	HiSeq2000	100	diagnosed
SAMPLE_22455	SINGLE_1515	SINGLE	agilentV4	HiSeq2000	100	diagnosed
SAMPLE_22460	SINGLE_1520	SINGLE	agilentV4	HiSeq2000	100	diagnosed
SAMPLE_22467	SINGLE_1527	SINGLE	agilentV4	HiSeq2000	100	diagnosed
SAMPLE_22470	SINGLE_1530	SINGLE	agilentV4	HiSeq2000	100	diagnosed
SAMPLE_22471	SINGLE_1531	SINGLE	agilentV4	HiSeq2000	100	diagnosed
SAMPLE_22481	SINGLE_1541	SINGLE	agilentV4	HiSeq2000	100	diagnosed
SAMPLE_22490	SINGLE_1550	SINGLE	agilentV4	HiSeq2000	100	diagnosed
SAMPLE_22491	SINGLE_1551	SINGLE	agilentV4	HiSeq2000	100	diagnosed
SAMPLE_22492	SINGLE_1552	SINGLE	agilentV4	HiSeq2000	100	diagnosed
SAMPLE_22501	SINGLE_1561	SINGLE	agilentV5	HiSeq4000	150	diagnosed
SAMPLE_22503	SINGLE_1563	SINGLE	agilentV4	HiSeq2000	100	diagnosed
SAMPLE_22508	SINGLE_1568	SINGLE	agilentV4	HiSeq2000	100	diagnosed
SAMPLE_2251	TRIO_751	CHILD	agilentV4	HiSeq2000	100	diagnosed
SAMPLE_22513	SINGLE_1573	SINGLE	agilentV4	HiSeq2000	100	diagnosed
SAMPLE_22515	SINGLE_1575	SINGLE	agilentV4	HiSeq2000	100	diagnosed
SAMPLE_22530	SINGLE_1590	SINGLE	agilentV4	HiSeq2000	100	diagnosed
SAMPLE_22532	SINGLE_1592	SINGLE	agilentV4	HiSeq2000	100	diagnosed
SAMPLE_22539	SINGLE_1599	SINGLE	agilentV4	HiSeq2000	100	diagnosed
SAMPLE_22540	SINGLE_1600	SINGLE	agilentV4	HiSeq2000	100	diagnosed
SAMPLE_22541	SINGLE_1601	SINGLE	agilentV4	HiSeq2000	100	diagnosed
SAMPLE_22542	SINGLE_1602	SINGLE	agilentV4	HiSeq2000	100	diagnosed
SAMPLE_22543	SINGLE_1603	SINGLE	agilentV4	HiSeq2000	100	diagnosed
SAMPLE_22545	SINGLE_1605	SINGLE	agilentV4	HiSeq2000	100	diagnosed
SAMPLE_22548	SINGLE_1608	SINGLE	agilentV4	HiSeq2000	100	diagnosed
SAMPLE_22556	SINGLE_1616	SINGLE	agilentV4	HiSeq2000	100	diagnosed
SAMPLE_22567	SINGLE_1627	SINGLE	agilentV4	HiSeq2000	100	diagnosed
SAMPLE_2257	TRIO_753	CHILD	agilentV4	HiSeq2000	100	diagnosed
SAMPLE_22570	SINGLE_1630	SINGLE	agilentV4	HiSeq2000	100	diagnosed
SAMPLE_22581	SINGLE_1641	SINGLE	agilentV4	HiSeq2000	100	diagnosed
SAMPLE_22583	SINGLE_1643	SINGLE	agilentV4	HiSeq2000	100	diagnosed
SAMPLE_22584	SINGLE_1644	SINGLE	agilentV4	HiSeq2000	100	diagnosed
SAMPLE_22586	SINGLE_1646	SINGLE	agilentV4	HiSeq2000	100	diagnosed
SAMPLE_22587	SINGLE_1647	SINGLE	agilentV4	HiSeq2000	100	diagnosed
SAMPLE_22592	SINGLE_1652	SINGLE	agilentV4	HiSeq2000	100	diagnosed
SAMPLE_22594	SINGLE_1654	SINGLE	agilentV4	HiSeq2000	100	diagnosed
SAMPLE_22597	SINGLE_1657	SINGLE	agilentV4	HiSeq2000	100	diagnosed
SAMPLE_22600	SINGLE_1660	SINGLE	agilentV5	HiSeq2000	100	diagnosed
SAMPLE_22602	SINGLE_1662	SINGLE	agilentV4	HiSeq2000	100	diagnosed
SAMPLE_22604	SINGLE_1664	SINGLE	agilentV4	HiSeq2000	100	diagnosed
SAMPLE_22605	SINGLE_1665	SINGLE	agilentV4	HiSeq2000	100	diagnosed
SAMPLE_22606	SINGLE_1666	SINGLE	agilentV4	HiSeq2000	100	diagnosed
SAMPLE_22611	SINGLE_1671	SINGLE	agilentV4	HiSeq2000	100	diagnosed
SAMPLE_22619	SINGLE_1679	SINGLE	agilentV4	HiSeq2000	100	diagnosed
SAMPLE_22627	SINGLE_1687	SINGLE	agilentV4	HiSeq2000	100	diagnosed
SAMPLE_22631	SINGLE_1691	SINGLE	agilentV4	HiSeq2000	100	diagnosed
SAMPLE_22635	SINGLE_1695	SINGLE	agilentV5	HiSeq4000	150	diagnosed
SAMPLE_22647	SINGLE_1707	SINGLE	agilentV4	HiSeq2000	100	diagnosed
SAMPLE_22656	SINGLE_1716	SINGLE	agilentV4	HiSeq2000	100	diagnosed
SAMPLE_2266	TRIO_756	CHILD	agilentV4	HiSeq2000	100	diagnosed
SAMPLE_22661	SINGLE_1721	SINGLE	agilentV4	HiSeq2000	100	diagnosed
SAMPLE_22664	SINGLE_1724	SINGLE	agilentV4	HiSeq2000	100	diagnosed
SAMPLE_22672	SINGLE_1732	SINGLE	agilentV4	HiSeq2000	100	diagnosed
SAMPLE_22676	SINGLE_1736	SINGLE	agilentV4	HiSeq2000	100	diagnosed
SAMPLE_22677	SINGLE_1737	SINGLE	agilentV4	HiSeq2000	100	diagnosed
SAMPLE_22683	SINGLE_1743	SINGLE	agilentV4	HiSeq2000	100	diagnosed
SAMPLE_22685	SINGLE_1745	SINGLE	agilentV4	HiSeq2000	100	diagnosed
SAMPLE_22686	SINGLE_1746	SINGLE	agilentV4	HiSeq2000	100	diagnosed
SAMPLE_22688	SINGLE_1748	SINGLE	agilentV4	HiSeq2000	100	diagnosed
SAMPLE_2269	TRIO_757	CHILD	agilentV4	HiSeq2000	100	diagnosed
SAMPLE_22692	SINGLE_1752	SINGLE	agilentV4	HiSeq2000	100	diagnosed
SAMPLE_22697	SINGLE_1757	SINGLE	agilentV4	HiSeq2000	100	diagnosed
SAMPLE_22709	SINGLE_1769	SINGLE	agilentV4	HiSeq2000	100	diagnosed
SAMPLE_22714	SINGLE_1774	SINGLE	agilentV4	HiSeq2000	100	diagnosed
SAMPLE_22723	SINGLE_1783	SINGLE	agilentV4	HiSeq2000	100	diagnosed
SAMPLE_22733	SINGLE_1793	SINGLE	agilentV4	HiSeq2000	100	diagnosed
SAMPLE_22738	SINGLE_1798	SINGLE	agilentV4	HiSeq2000	100	diagnosed
SAMPLE_22741	SINGLE_1801	SINGLE	agilentV4	HiSeq2000	100	diagnosed
SAMPLE_22744	SINGLE_1804	SINGLE	agilentV4	HiSeq2000	100	diagnosed
SAMPLE_22745	SINGLE_1805	SINGLE	agilentV5	HiSeq4000	150	diagnosed
SAMPLE_22778	SINGLE_1838	SINGLE	agilentV4	HiSeq2000	100	diagnosed
SAMPLE_2278	TRIO_760	CHILD	agilentV4	HiSeq2000	100	diagnosed
SAMPLE_22782	SINGLE_1842	SINGLE	agilentV4	HiSeq2000	100	diagnosed
SAMPLE_22787	SINGLE_1847	SINGLE	agilentV4	HiSeq2000	100	diagnosed
SAMPLE_22801	SINGLE_1861	SINGLE	agilentV4	HiSeq2000	100	diagnosed
SAMPLE_22808	SINGLE_1868	SINGLE	agilentV4	HiSeq2000	100	diagnosed
SAMPLE_22820	SINGLE_1880	SINGLE	agilentV4	HiSeq2000	100	diagnosed
SAMPLE_22824	SINGLE_1884	SINGLE	agilentV5	HiSeq4000	150	diagnosed
SAMPLE_22831	SINGLE_1891	SINGLE	agilentV4	HiSeq2000	100	diagnosed
SAMPLE_22833	SINGLE_1893	SINGLE	agilentV4	HiSeq2000	100	diagnosed
SAMPLE_22835	SINGLE_1895	SINGLE	agilentV4	HiSeq2000	100	diagnosed
SAMPLE_22850	SINGLE_1910	SINGLE	agilentV4	HiSeq2000	100	diagnosed
SAMPLE_22853	SINGLE_1913	SINGLE	agilentV4	HiSeq2000	100	diagnosed
SAMPLE_22858	SINGLE_1918	SINGLE	agilentV4	HiSeq2000	100	diagnosed
SAMPLE_22862	SINGLE_1922	SINGLE	agilentV4	HiSeq2000	100	diagnosed
SAMPLE_22866	SINGLE_1926	SINGLE	agilentV4	HiSeq2000	100	diagnosed
SAMPLE_2287	TRIO_763	CHILD	agilentV4	HiSeq2000	100	diagnosed
SAMPLE_22873	SINGLE_1933	SINGLE	agilentV5	HiSeq2000	100	diagnosed
SAMPLE_22875	SINGLE_1935	SINGLE	agilentV4	HiSeq2000	100	diagnosed
SAMPLE_22876	SINGLE_1936	SINGLE	agilentV4	HiSeq2000	100	diagnosed
SAMPLE_22879	SINGLE_1939	SINGLE	agilentV4	HiSeq2000	100	diagnosed
SAMPLE_22880	SINGLE_1940	SINGLE	agilentV4	HiSeq2000	100	diagnosed
SAMPLE_22881	SINGLE_1941	SINGLE	agilentV4	HiSeq2000	100	diagnosed
SAMPLE_22882	SINGLE_1942	SINGLE	agilentV4	HiSeq2000	100	diagnosed
SAMPLE_22883	SINGLE_1943	SINGLE	agilentV4	HiSeq2000	100	diagnosed
SAMPLE_22890	SINGLE_1950	SINGLE	agilentV4	HiSeq2000	100	diagnosed
SAMPLE_22894	SINGLE_1954	SINGLE	agilentV4	HiSeq2000	100	diagnosed
SAMPLE_2290	TRIO_764	CHILD	agilentV4	HiSeq2000	100	diagnosed
SAMPLE_22903	SINGLE_1963	SINGLE	agilentV4	HiSeq2000	100	diagnosed
SAMPLE_22908	SINGLE_1968	SINGLE	agilentV4	HiSeq2000	100	diagnosed
SAMPLE_22910	SINGLE_1970	SINGLE	agilentV4	HiSeq2000	100	diagnosed
SAMPLE_22916	SINGLE_1976	SINGLE	agilentV4	HiSeq2000	100	diagnosed
SAMPLE_22920	SINGLE_1980	SINGLE	agilentV4	HiSeq2000	100	diagnosed
SAMPLE_22927	SINGLE_1987	SINGLE	agilentV5	HiSeq4000	150	diagnosed
SAMPLE_22928	SINGLE_1988	SINGLE	agilentV4	HiSeq2000	100	diagnosed
SAMPLE_2293	TRIO_765	CHILD	agilentV4	HiSeq2000	100	diagnosed
SAMPLE_22939	SINGLE_1999	SINGLE	agilentV4	HiSeq2000	100	diagnosed
SAMPLE_22946	SINGLE_2006	SINGLE	agilentV4	HiSeq2000	100	diagnosed
SAMPLE_22957	SINGLE_2017	SINGLE	agilentV4	HiSeq2000	100	diagnosed
SAMPLE_22968	SINGLE_2028	SINGLE	agilentV4	HiSeq2000	100	diagnosed
SAMPLE_22970	SINGLE_2030	SINGLE	agilentV4	HiSeq2000	100	diagnosed
SAMPLE_22974	SINGLE_2034	SINGLE	agilentV4	HiSeq2000	100	diagnosed
SAMPLE_22978	SINGLE_2038	SINGLE	agilentV5	HiSeq4000	150	diagnosed
SAMPLE_22991	SINGLE_2051	SINGLE	agilentV4	HiSeq2000	100	diagnosed
SAMPLE_22992	SINGLE_2052	SINGLE	agilentV5	HiSeq4000	150	diagnosed
SAMPLE_23012	SINGLE_2072	SINGLE	agilentV4	HiSeq2000	100	diagnosed
SAMPLE_23017	SINGLE_2077	SINGLE	agilentV4	HiSeq2000	100	diagnosed
SAMPLE_23024	SINGLE_2084	SINGLE	agilentV4	HiSeq2000	100	diagnosed
SAMPLE_23026	SINGLE_2086	SINGLE	agilentV4	HiSeq2000	100	diagnosed
SAMPLE_23029	SINGLE_2089	SINGLE	agilentV4	HiSeq2000	100	diagnosed
SAMPLE_23035	SINGLE_2095	SINGLE	agilentV4	HiSeq2000	100	diagnosed
SAMPLE_23036	SINGLE_2096	SINGLE	agilentV4	HiSeq2000	100	diagnosed
SAMPLE_23037	SINGLE_2097	SINGLE	agilentV4	HiSeq2000	100	diagnosed
SAMPLE_23039	SINGLE_2099	SINGLE	agilentV4	HiSeq2000	100	diagnosed
SAMPLE_23040	SINGLE_2100	SINGLE	agilentV4	HiSeq2000	100	diagnosed
SAMPLE_23042	SINGLE_2102	SINGLE	agilentV4	HiSeq2000	100	diagnosed
SAMPLE_23055	SINGLE_2115	SINGLE	agilentV5	HiSeq4000	150	diagnosed
SAMPLE_23062	SINGLE_2122	SINGLE	agilentV4	HiSeq2000	100	diagnosed
SAMPLE_23065	SINGLE_2125	SINGLE	agilentV4	HiSeq2000	100	diagnosed
SAMPLE_23068	SINGLE_2128	SINGLE	agilentV4	HiSeq2000	100	diagnosed
SAMPLE_23073	SINGLE_2133	SINGLE	agilentV4	HiSeq2000	100	diagnosed
SAMPLE_23076	SINGLE_2136	SINGLE	agilentV4	HiSeq2000	100	diagnosed
SAMPLE_23078	SINGLE_2138	SINGLE	agilentV4	HiSeq2000	100	diagnosed
SAMPLE_23081	SINGLE_2141	SINGLE	agilentV4	HiSeq2000	100	diagnosed
SAMPLE_23084	SINGLE_2144	SINGLE	agilentV4	HiSeq2000	100	diagnosed
SAMPLE_23085	SINGLE_2145	SINGLE	agilentV4	HiSeq2000	100	diagnosed
SAMPLE_23091	SINGLE_2151	SINGLE	agilentV4	HiSeq2000	100	diagnosed
SAMPLE_23092	SINGLE_2152	SINGLE	agilentV4	HiSeq2000	100	diagnosed
SAMPLE_23096	SINGLE_2156	SINGLE	agilentV4	HiSeq2000	100	diagnosed
SAMPLE_23114	SINGLE_2174	SINGLE	agilentV4	HiSeq2000	100	diagnosed
SAMPLE_23119	SINGLE_2179	SINGLE	agilentV4	HiSeq2000	100	diagnosed
SAMPLE_23121	SINGLE_2181	SINGLE	agilentV4	HiSeq2000	100	diagnosed
SAMPLE_23142	SINGLE_2202	SINGLE	agilentV4	HiSeq2000	100	diagnosed
SAMPLE_23143	SINGLE_2203	SINGLE	agilentV4	HiSeq2000	100	diagnosed
SAMPLE_23144	SINGLE_2204	SINGLE	agilentV4	HiSeq2000	100	diagnosed
SAMPLE_23145	SINGLE_2205	SINGLE	agilentV4	HiSeq2000	100	diagnosed
SAMPLE_23150	SINGLE_2210	SINGLE	agilentV4	HiSeq2000	100	diagnosed
SAMPLE_23160	SINGLE_2220	SINGLE	agilentV4	HiSeq2000	100	diagnosed
SAMPLE_23163	SINGLE_2223	SINGLE	agilentV5	HiSeq4000	150	diagnosed
SAMPLE_2317	TRIO_773	CHILD	agilentV4	HiSeq2000	100	diagnosed
SAMPLE_23170	SINGLE_2230	SINGLE	agilentV4	HiSeq2000	100	diagnosed
SAMPLE_23173	SINGLE_2233	SINGLE	agilentV4	HiSeq2000	100	diagnosed
SAMPLE_23179	SINGLE_2239	SINGLE	agilentV5	HiSeq2000	100	diagnosed
SAMPLE_23190	SINGLE_2250	SINGLE	agilentV4	HiSeq2000	100	diagnosed
SAMPLE_23191	SINGLE_2251	SINGLE	agilentV4	HiSeq2000	100	diagnosed
SAMPLE_23197	SINGLE_2257	SINGLE	agilentV4	HiSeq2000	100	diagnosed
SAMPLE_23205	SINGLE_2265	SINGLE	agilentV5	HiSeq4000	150	diagnosed
SAMPLE_23210	SINGLE_2270	SINGLE	agilentV4	HiSeq2000	100	diagnosed
SAMPLE_23214	SINGLE_2274	SINGLE	agilentV4	HiSeq2000	100	diagnosed
SAMPLE_23216	SINGLE_2276	SINGLE	agilentV4	HiSeq2000	100	diagnosed
SAMPLE_23217	SINGLE_2277	SINGLE	agilentV4	HiSeq2000	100	diagnosed
SAMPLE_23221	SINGLE_2281	SINGLE	agilentV4	HiSeq2000	100	diagnosed
SAMPLE_23222	SINGLE_2282	SINGLE	agilentV4	HiSeq2000	100	diagnosed
SAMPLE_23227	SINGLE_2287	SINGLE	agilentV5	HiSeq2000	100	diagnosed
SAMPLE_23229	SINGLE_2289	SINGLE	agilentV4	HiSeq2000	100	diagnosed
SAMPLE_23231	SINGLE_2291	SINGLE	agilentV5	HiSeq4000	150	diagnosed
SAMPLE_23238	SINGLE_2298	SINGLE	agilentV4	HiSeq2000	100	diagnosed
SAMPLE_23239	SINGLE_2299	SINGLE	agilentV4	HiSeq2000	100	diagnosed
SAMPLE_23244	SINGLE_2304	SINGLE	agilentV5	HiSeq4000	150	diagnosed
SAMPLE_23250	SINGLE_2310	SINGLE	agilentV4	HiSeq2000	100	diagnosed
SAMPLE_23254	SINGLE_2314	SINGLE	agilentV4	HiSeq2000	100	diagnosed
SAMPLE_23257	SINGLE_2317	SINGLE	agilentV4	HiSeq2000	100	diagnosed
SAMPLE_23262	SINGLE_2322	SINGLE	agilentV4	HiSeq2000	100	diagnosed
SAMPLE_23263	SINGLE_2323	SINGLE	agilentV4	HiSeq2000	100	diagnosed
SAMPLE_23272	SINGLE_2332	SINGLE	agilentV4	HiSeq2000	100	diagnosed
SAMPLE_23284	SINGLE_2344	SINGLE	agilentV4	HiSeq2000	100	diagnosed
SAMPLE_23285	SINGLE_2345	SINGLE	agilentV4	HiSeq2000	100	diagnosed
SAMPLE_23287	SINGLE_2347	SINGLE	agilentV4	HiSeq2000	100	diagnosed
SAMPLE_23290	SINGLE_2350	SINGLE	agilentV4	HiSeq2000	100	diagnosed
SAMPLE_23291	SINGLE_2351	SINGLE	agilentV5	HiSeq2000	100	diagnosed
SAMPLE_23306	SINGLE_2366	SINGLE	agilentV5	HiSeq4000	150	diagnosed
SAMPLE_23311	SINGLE_2371	SINGLE	agilentV4	HiSeq2000	100	diagnosed
SAMPLE_23314	SINGLE_2374	SINGLE	agilentV4	HiSeq2000	100	diagnosed
SAMPLE_2332	TRIO_778	CHILD	agilentV4	HiSeq2000	100	diagnosed
SAMPLE_23323	SINGLE_2383	SINGLE	agilentV4	HiSeq2000	100	diagnosed
SAMPLE_23325	SINGLE_2385	SINGLE	agilentV4	HiSeq2000	100	diagnosed
SAMPLE_23334	SINGLE_2394	SINGLE	agilentV4	HiSeq2000	100	diagnosed
SAMPLE_23342	SINGLE_2402	SINGLE	agilentV4	HiSeq2000	100	diagnosed
SAMPLE_23349	SINGLE_2409	SINGLE	agilentV4	HiSeq2000	100	diagnosed
SAMPLE_2335	TRIO_779	CHILD	agilentV4	HiSeq2000	100	diagnosed
SAMPLE_23351	SINGLE_2411	SINGLE	agilentV4	HiSeq2000	100	diagnosed
SAMPLE_23352	SINGLE_2412	SINGLE	agilentV4	HiSeq2000	100	diagnosed
SAMPLE_23354	SINGLE_2414	SINGLE	agilentV5	HiSeq2000	100	diagnosed
SAMPLE_23374	SINGLE_2434	SINGLE	agilentV4	HiSeq2000	100	diagnosed
SAMPLE_23379	SINGLE_2439	SINGLE	agilentV4	HiSeq2000	100	diagnosed
SAMPLE_23386	SINGLE_2446	SINGLE	agilentV4	HiSeq2000	100	diagnosed
SAMPLE_23389	SINGLE_2449	SINGLE	agilentV4	HiSeq2000	100	diagnosed
SAMPLE_23390	SINGLE_2450	SINGLE	agilentV4	HiSeq2000	100	diagnosed
SAMPLE_23392	SINGLE_2452	SINGLE	agilentV4	HiSeq2000	100	diagnosed
SAMPLE_23393	SINGLE_2453	SINGLE	agilentV4	HiSeq2000	100	diagnosed
SAMPLE_23395	SINGLE_2455	SINGLE	agilentV4	HiSeq2000	100	diagnosed
SAMPLE_23402	SINGLE_2462	SINGLE	agilentV4	HiSeq2000	100	diagnosed
SAMPLE_2341	TRIO_781	CHILD	agilentV4	HiSeq2000	100	diagnosed
SAMPLE_23414	SINGLE_2474	SINGLE	agilentV4	HiSeq2000	100	diagnosed
SAMPLE_23417	SINGLE_2477	SINGLE	agilentV4	HiSeq2000	100	diagnosed
SAMPLE_23420	SINGLE_2480	SINGLE	agilentV4	HiSeq2000	100	diagnosed
SAMPLE_23421	SINGLE_2481	SINGLE	agilentV4	HiSeq2000	100	diagnosed
SAMPLE_23426	SINGLE_2486	SINGLE	agilentV4	HiSeq2000	100	diagnosed
SAMPLE_23433	SINGLE_2493	SINGLE	agilentV5	HiSeq4000	150	diagnosed
SAMPLE_23435	SINGLE_2495	SINGLE	agilentV4	HiSeq2000	100	diagnosed
SAMPLE_23440	SINGLE_2500	SINGLE	agilentV4	HiSeq2000	100	diagnosed
SAMPLE_23442	SINGLE_2502	SINGLE	agilentV4	HiSeq2000	100	diagnosed
SAMPLE_23444	SINGLE_2504	SINGLE	agilentV5	HiSeq4000	150	diagnosed
SAMPLE_23451	SINGLE_2511	SINGLE	agilentV4	HiSeq2000	100	diagnosed
SAMPLE_23453	SINGLE_2513	SINGLE	agilentV5	HiSeq2000	100	diagnosed
SAMPLE_23459	SINGLE_2519	SINGLE	agilentV4	HiSeq2000	100	diagnosed
SAMPLE_23463	SINGLE_2523	SINGLE	agilentV4	HiSeq2000	100	diagnosed
SAMPLE_23464	SINGLE_2524	SINGLE	agilentV5	HiSeq2000	100	diagnosed
SAMPLE_23466	SINGLE_2526	SINGLE	agilentV4	HiSeq2000	100	diagnosed
SAMPLE_2347	TRIO_783	CHILD	agilentV4	HiSeq2000	100	diagnosed
SAMPLE_23472	SINGLE_2532	SINGLE	agilentV4	HiSeq2000	100	diagnosed
SAMPLE_23474	SINGLE_2534	SINGLE	agilentV4	HiSeq2000	100	diagnosed
SAMPLE_23481	SINGLE_2541	SINGLE	agilentV4	HiSeq2000	100	diagnosed
SAMPLE_23483	SINGLE_2543	SINGLE	agilentV5	HiSeq4000	150	diagnosed
SAMPLE_23494	SINGLE_2554	SINGLE	agilentV4	HiSeq2000	100	diagnosed
SAMPLE_23499	SINGLE_2559	SINGLE	agilentV4	HiSeq2000	100	diagnosed
SAMPLE_23500	SINGLE_2560	SINGLE	agilentV4	HiSeq2000	100	diagnosed
SAMPLE_23510	SINGLE_2570	SINGLE	agilentV4	HiSeq2000	100	diagnosed
SAMPLE_23511	SINGLE_2571	SINGLE	agilentV4	HiSeq2000	100	diagnosed
SAMPLE_23512	SINGLE_2572	SINGLE	agilentV4	HiSeq2000	100	diagnosed
SAMPLE_23523	SINGLE_2583	SINGLE	agilentV4	HiSeq2000	100	diagnosed
SAMPLE_23526	SINGLE_2586	SINGLE	agilentV4	HiSeq2000	100	diagnosed
SAMPLE_23532	SINGLE_2592	SINGLE	agilentV4	HiSeq2000	100	diagnosed
SAMPLE_23533	SINGLE_2593	SINGLE	agilentV4	HiSeq2000	100	diagnosed
SAMPLE_23539	SINGLE_2599	SINGLE	agilentV4	HiSeq2000	100	diagnosed
SAMPLE_23546	SINGLE_2606	SINGLE	agilentV4	HiSeq2000	100	diagnosed
SAMPLE_23548	SINGLE_2608	SINGLE	agilentV4	HiSeq2000	100	diagnosed
SAMPLE_23553	SINGLE_2613	SINGLE	agilentV4	HiSeq2000	100	diagnosed
SAMPLE_23557	SINGLE_2617	SINGLE	agilentV4	HiSeq2000	100	diagnosed
SAMPLE_23560	SINGLE_2620	SINGLE	agilentV4	HiSeq2000	100	diagnosed
SAMPLE_23562	SINGLE_2622	SINGLE	agilentV4	HiSeq2000	100	diagnosed
SAMPLE_23566	SINGLE_2626	SINGLE	agilentV4	HiSeq2000	100	diagnosed
SAMPLE_23567	SINGLE_2627	SINGLE	agilentV5	HiSeq4000	150	diagnosed
SAMPLE_23575	SINGLE_2635	SINGLE	agilentV4	HiSeq2000	100	diagnosed
SAMPLE_23584	SINGLE_2644	SINGLE	agilentV4	HiSeq2000	100	diagnosed
SAMPLE_23586	SINGLE_2646	SINGLE	agilentV4	HiSeq2000	100	diagnosed
SAMPLE_23601	SINGLE_2661	SINGLE	agilentV4	HiSeq2000	100	diagnosed
SAMPLE_23603	SINGLE_2663	SINGLE	agilentV5	HiSeq4000	150	diagnosed
SAMPLE_23607	SINGLE_2667	SINGLE	agilentV4	HiSeq2000	100	diagnosed
SAMPLE_23608	SINGLE_2668	SINGLE	agilentV4	HiSeq2000	100	diagnosed
SAMPLE_23610	SINGLE_2670	SINGLE	agilentV4	HiSeq2000	100	diagnosed
SAMPLE_23614	SINGLE_2674	SINGLE	agilentV4	HiSeq2000	100	diagnosed
SAMPLE_23626	SINGLE_2686	SINGLE	agilentV4	HiSeq2000	100	diagnosed
SAMPLE_23632	SINGLE_2692	SINGLE	agilentV4	HiSeq2000	100	diagnosed
SAMPLE_23634	SINGLE_2694	SINGLE	agilentV4	HiSeq2000	100	diagnosed
SAMPLE_23640	SINGLE_2700	SINGLE	agilentV4	HiSeq2000	100	diagnosed
SAMPLE_23642	SINGLE_2702	SINGLE	agilentV4	HiSeq2000	100	diagnosed
SAMPLE_23646	SINGLE_2706	SINGLE	agilentV4	HiSeq2000	100	diagnosed
SAMPLE_23647	SINGLE_2707	SINGLE	agilentV4	HiSeq2000	100	diagnosed
SAMPLE_23652	SINGLE_2712	SINGLE	agilentV4	HiSeq2000	100	diagnosed
SAMPLE_23658	SINGLE_2718	SINGLE	agilentV4	HiSeq2000	100	diagnosed
SAMPLE_23659	SINGLE_2719	SINGLE	agilentV4	HiSeq2000	100	diagnosed
SAMPLE_23662	SINGLE_2722	SINGLE	agilentV4	HiSeq2000	100	diagnosed
SAMPLE_23673	SINGLE_2733	SINGLE	agilentV4	HiSeq2000	100	diagnosed
SAMPLE_23686	SINGLE_2746	SINGLE	agilentV4	HiSeq2000	100	diagnosed
SAMPLE_23690	SINGLE_2750	SINGLE	agilentV4	HiSeq2000	100	diagnosed
SAMPLE_23722	SINGLE_2782	SINGLE	agilentV4	HiSeq2000	100	diagnosed
SAMPLE_23733	SINGLE_2793	SINGLE	agilentV4	HiSeq2000	100	diagnosed
SAMPLE_23736	SINGLE_2796	SINGLE	agilentV4	HiSeq2000	100	diagnosed
SAMPLE_23737	SINGLE_2797	SINGLE	agilentV4	HiSeq2000	100	diagnosed
SAMPLE_23741	SINGLE_2801	SINGLE	agilentV4	HiSeq2000	100	diagnosed
SAMPLE_23743	SINGLE_2803	SINGLE	agilentV4	HiSeq2000	100	diagnosed
SAMPLE_23746	SINGLE_2806	SINGLE	agilentV4	HiSeq2000	100	diagnosed
SAMPLE_23757	SINGLE_2817	SINGLE	agilentV4	HiSeq2000	100	diagnosed
SAMPLE_23760	SINGLE_2820	SINGLE	agilentV4	HiSeq2000	100	diagnosed
SAMPLE_23761	SINGLE_2821	SINGLE	agilentV4	HiSeq2000	100	diagnosed
SAMPLE_23762	SINGLE_2822	SINGLE	agilentV4	HiSeq2000	100	diagnosed
SAMPLE_23765	SINGLE_2825	SINGLE	agilentV4	HiSeq2000	100	diagnosed
SAMPLE_23767	SINGLE_2827	SINGLE	agilentV4	HiSeq2000	100	diagnosed
SAMPLE_23768	SINGLE_2828	SINGLE	agilentV5	HiSeq4000	150	diagnosed
SAMPLE_23769	SINGLE_2829	SINGLE	agilentV4	HiSeq2000	100	diagnosed
SAMPLE_23772	SINGLE_2832	SINGLE	agilentV4	HiSeq2000	100	diagnosed
SAMPLE_23779	SINGLE_2839	SINGLE	agilentV4	HiSeq2000	100	diagnosed
SAMPLE_23784	SINGLE_2844	SINGLE	agilentV4	HiSeq2000	100	diagnosed
SAMPLE_23788	SINGLE_2848	SINGLE	agilentV4	HiSeq2000	100	diagnosed
SAMPLE_23789	SINGLE_2849	SINGLE	agilentV4	HiSeq2000	100	diagnosed
SAMPLE_23797	SINGLE_2857	SINGLE	agilentV4	HiSeq2000	100	diagnosed
SAMPLE_23798	SINGLE_2858	SINGLE	agilentV4	HiSeq2000	100	diagnosed
SAMPLE_2380	TRIO_794	CHILD	agilentV4	HiSeq2000	100	diagnosed
SAMPLE_23801	SINGLE_2861	SINGLE	agilentV4	HiSeq2000	100	diagnosed
SAMPLE_23805	SINGLE_2865	SINGLE	agilentV4	HiSeq2000	100	diagnosed
SAMPLE_23810	SINGLE_2870	SINGLE	agilentV4	HiSeq2000	100	diagnosed
SAMPLE_23812	SINGLE_2872	SINGLE	agilentV4	HiSeq2000	100	diagnosed
SAMPLE_23813	SINGLE_2873	SINGLE	agilentV4	HiSeq2000	100	diagnosed
SAMPLE_23816	SINGLE_2876	SINGLE	agilentV4	HiSeq2000	100	diagnosed
SAMPLE_23820	SINGLE_2880	SINGLE	agilentV4	HiSeq2000	100	diagnosed
SAMPLE_23821	SINGLE_2881	SINGLE	agilentV4	HiSeq2000	100	diagnosed
SAMPLE_23822	SINGLE_2882	SINGLE	agilentV4	HiSeq2000	100	diagnosed
SAMPLE_23823	SINGLE_2883	SINGLE	agilentV4	HiSeq2000	100	diagnosed
SAMPLE_23829	SINGLE_2889	SINGLE	agilentV4	HiSeq2000	100	diagnosed
SAMPLE_23834	SINGLE_2894	SINGLE	agilentV4	HiSeq2000	100	diagnosed
SAMPLE_23840	SINGLE_2900	SINGLE	agilentV4	HiSeq2000	100	diagnosed
SAMPLE_23842	SINGLE_2902	SINGLE	agilentV4	HiSeq2000	100	diagnosed
SAMPLE_23843	SINGLE_2903	SINGLE	agilentV4	HiSeq2000	100	diagnosed
SAMPLE_23845	SINGLE_2905	SINGLE	agilentV4	HiSeq2000	100	diagnosed
SAMPLE_23846	SINGLE_2906	SINGLE	agilentV5	HiSeq2000	100	diagnosed
SAMPLE_23847	SINGLE_2907	SINGLE	agilentV4	HiSeq2000	100	diagnosed
SAMPLE_23852	SINGLE_2912	SINGLE	agilentV4	HiSeq2000	100	diagnosed
SAMPLE_23854	SINGLE_2914	SINGLE	agilentV4	HiSeq2000	100	diagnosed
SAMPLE_23861	SINGLE_2921	SINGLE	agilentV4	HiSeq2000	100	diagnosed
SAMPLE_23877	SINGLE_2937	SINGLE	agilentV4	HiSeq2000	100	diagnosed
SAMPLE_23879	SINGLE_2939	SINGLE	agilentV4	HiSeq2000	100	diagnosed
SAMPLE_23883	SINGLE_2943	SINGLE	agilentV4	HiSeq2000	100	diagnosed
SAMPLE_23888	SINGLE_2948	SINGLE	agilentV4	HiSeq2000	100	diagnosed
SAMPLE_23892	SINGLE_2952	SINGLE	agilentV4	HiSeq2000	100	diagnosed
SAMPLE_23899	SINGLE_2959	SINGLE	agilentV4	HiSeq2000	100	diagnosed
SAMPLE_23902	SINGLE_2962	SINGLE	agilentV5	HiSeq2000	100	diagnosed
SAMPLE_23908	SINGLE_2968	SINGLE	agilentV4	HiSeq2000	100	diagnosed
SAMPLE_23909	SINGLE_2969	SINGLE	agilentV4	HiSeq2000	100	diagnosed
SAMPLE_23919	SINGLE_2979	SINGLE	agilentV4	HiSeq2000	100	diagnosed
SAMPLE_2392	TRIO_798	CHILD	agilentV4	HiSeq2000	100	diagnosed
SAMPLE_23924	SINGLE_2984	SINGLE	agilentV4	HiSeq2000	100	diagnosed
SAMPLE_23933	SINGLE_2993	SINGLE	agilentV4	HiSeq2000	100	diagnosed
SAMPLE_23935	SINGLE_2995	SINGLE	agilentV4	HiSeq2000	100	diagnosed
SAMPLE_23942	SINGLE_3002	SINGLE	agilentV4	HiSeq2000	100	diagnosed
SAMPLE_23943	SINGLE_3003	SINGLE	agilentV4	HiSeq2000	100	diagnosed
SAMPLE_23947	SINGLE_3007	SINGLE	agilentV4	HiSeq2000	100	diagnosed
SAMPLE_23952	SINGLE_3012	SINGLE	agilentV4	HiSeq2000	100	diagnosed
SAMPLE_23961	SINGLE_3021	SINGLE	agilentV4	HiSeq2000	100	diagnosed
SAMPLE_23962	SINGLE_3022	SINGLE	agilentV4	HiSeq2000	100	diagnosed
SAMPLE_23972	SINGLE_3032	SINGLE	agilentV4	HiSeq2000	100	diagnosed
SAMPLE_23973	SINGLE_3033	SINGLE	agilentV4	HiSeq2000	100	diagnosed
SAMPLE_23981	SINGLE_3041	SINGLE	agilentV4	HiSeq2000	100	diagnosed
SAMPLE_23985	SINGLE_3045	SINGLE	agilentV4	HiSeq2000	100	diagnosed
SAMPLE_23994	SINGLE_3054	SINGLE	agilentV4	HiSeq2000	100	diagnosed
SAMPLE_24000	SINGLE_3060	SINGLE	agilentV4	HiSeq2000	100	diagnosed
SAMPLE_24006	SINGLE_3066	SINGLE	agilentV4	HiSeq2000	100	diagnosed
SAMPLE_24010	SINGLE_3070	SINGLE	agilentV4	HiSeq2000	100	diagnosed
SAMPLE_24017	SINGLE_3077	SINGLE	agilentV4	HiSeq2000	100	diagnosed
SAMPLE_24018	SINGLE_3078	SINGLE	agilentV4	HiSeq2000	100	diagnosed
SAMPLE_24022	SINGLE_3082	SINGLE	agilentV4	HiSeq2000	100	diagnosed
SAMPLE_24028	SINGLE_3088	SINGLE	agilentV4	HiSeq2000	100	diagnosed
SAMPLE_24030	SINGLE_3090	SINGLE	agilentV4	HiSeq2000	100	diagnosed
SAMPLE_24034	SINGLE_3094	SINGLE	agilentV4	HiSeq2000	100	diagnosed
SAMPLE_24037	SINGLE_3097	SINGLE	agilentV4	HiSeq2000	100	diagnosed
SAMPLE_24039	SINGLE_3099	SINGLE	agilentV4	HiSeq2000	100	diagnosed
SAMPLE_2404	TRIO_802	CHILD	agilentV4	HiSeq2000	100	diagnosed
SAMPLE_24052	SINGLE_3112	SINGLE	agilentV4	HiSeq2000	100	diagnosed
SAMPLE_24054	SINGLE_3114	SINGLE	agilentV4	HiSeq2000	100	diagnosed
SAMPLE_24060	SINGLE_3120	SINGLE	agilentV4	HiSeq2000	100	diagnosed
SAMPLE_24061	SINGLE_3121	SINGLE	agilentV4	HiSeq2000	100	diagnosed
SAMPLE_24066	SINGLE_3126	SINGLE	agilentV4	HiSeq2000	100	diagnosed
SAMPLE_24068	SINGLE_3128	SINGLE	agilentV4	HiSeq2000	100	diagnosed
SAMPLE_24077	SINGLE_3137	SINGLE	agilentV5	HiSeq4000	150	diagnosed
SAMPLE_24085	SINGLE_3145	SINGLE	agilentV4	HiSeq2000	100	diagnosed
SAMPLE_24093	SINGLE_3153	SINGLE	agilentV4	HiSeq2000	100	diagnosed
SAMPLE_241	TRIO_81	CHILD	agilentV4	HiSeq2000	100	diagnosed
SAMPLE_24104	SINGLE_3164	SINGLE	agilentV4	HiSeq2000	100	diagnosed
SAMPLE_24108	SINGLE_3168	SINGLE	agilentV5	HiSeq2000	100	diagnosed
SAMPLE_24109	SINGLE_3169	SINGLE	agilentV4	HiSeq2000	100	diagnosed
SAMPLE_24110	SINGLE_3170	SINGLE	agilentV4	HiSeq2000	100	diagnosed
SAMPLE_24112	SINGLE_3172	SINGLE	agilentV4	HiSeq2000	100	diagnosed
SAMPLE_24121	SINGLE_3181	SINGLE	agilentV4	HiSeq2000	100	diagnosed
SAMPLE_24127	SINGLE_3187	SINGLE	agilentV4	HiSeq2000	100	diagnosed
SAMPLE_2413	TRIO_805	CHILD	agilentV4	HiSeq2000	100	diagnosed
SAMPLE_24134	SINGLE_3194	SINGLE	agilentV4	HiSeq2000	100	diagnosed
SAMPLE_24138	SINGLE_3198	SINGLE	agilentV4	HiSeq2000	100	diagnosed
SAMPLE_24139	SINGLE_3199	SINGLE	agilentV4	HiSeq2000	100	diagnosed
SAMPLE_24148	SINGLE_3208	SINGLE	agilentV5	HiSeq2000	100	diagnosed
SAMPLE_24152	SINGLE_3212	SINGLE	agilentV4	HiSeq2000	100	diagnosed
SAMPLE_24154	SINGLE_3214	SINGLE	agilentV4	HiSeq2000	100	diagnosed
SAMPLE_24156	SINGLE_3216	SINGLE	agilentV4	HiSeq2000	100	diagnosed
SAMPLE_24157	SINGLE_3217	SINGLE	agilentV4	HiSeq2000	100	diagnosed
SAMPLE_24162	SINGLE_3222	SINGLE	agilentV4	HiSeq2000	100	diagnosed
SAMPLE_24163	SINGLE_3223	SINGLE	agilentV5	HiSeq2000	100	diagnosed
SAMPLE_24166	SINGLE_3226	SINGLE	agilentV4	HiSeq2000	100	diagnosed
SAMPLE_24172	SINGLE_3232	SINGLE	agilentV4	HiSeq2000	100	diagnosed
SAMPLE_24174	SINGLE_3234	SINGLE	agilentV4	HiSeq2000	100	diagnosed
SAMPLE_24183	SINGLE_3243	SINGLE	agilentV4	HiSeq2000	100	diagnosed
SAMPLE_24191	SINGLE_3251	SINGLE	agilentV4	HiSeq2000	100	diagnosed
SAMPLE_24200	SINGLE_3260	SINGLE	agilentV4	HiSeq2000	100	diagnosed
SAMPLE_24202	SINGLE_3262	SINGLE	agilentV4	HiSeq2000	100	diagnosed
SAMPLE_24216	SINGLE_3276	SINGLE	agilentV4	HiSeq2000	100	diagnosed
SAMPLE_24218	SINGLE_3278	SINGLE	agilentV4	HiSeq2000	100	diagnosed
SAMPLE_2425	TRIO_809	CHILD	agilentV4	HiSeq2000	100	diagnosed
SAMPLE_24263	SINGLE_3323	SINGLE	agilentV4	HiSeq2000	100	diagnosed
SAMPLE_24264	SINGLE_3324	SINGLE	agilentV4	HiSeq2000	100	diagnosed
SAMPLE_24266	SINGLE_3326	SINGLE	agilentV4	HiSeq2000	100	diagnosed
SAMPLE_24273	SINGLE_3333	SINGLE	agilentV4	HiSeq2000	100	diagnosed
SAMPLE_24275	SINGLE_3335	SINGLE	agilentV4	HiSeq2000	100	diagnosed
SAMPLE_24277	SINGLE_3337	SINGLE	agilentV5	HiSeq2000	100	diagnosed
SAMPLE_24278	SINGLE_3338	SINGLE	agilentV5	HiSeq4000	150	diagnosed
SAMPLE_24282	SINGLE_3342	SINGLE	agilentV4	HiSeq2000	100	diagnosed
SAMPLE_24284	SINGLE_3344	SINGLE	agilentV4	HiSeq2000	100	diagnosed
SAMPLE_24309	SINGLE_3369	SINGLE	agilentV4	HiSeq2000	100	diagnosed
SAMPLE_24311	SINGLE_3371	SINGLE	agilentV4	HiSeq2000	100	diagnosed
SAMPLE_24318	SINGLE_3378	SINGLE	agilentV4	HiSeq2000	100	diagnosed
SAMPLE_24320	SINGLE_3380	SINGLE	agilentV5	HiSeq2000	100	diagnosed
SAMPLE_24322	SINGLE_3382	SINGLE	agilentV4	HiSeq2000	100	diagnosed
SAMPLE_24325	SINGLE_3385	SINGLE	agilentV4	HiSeq2000	100	diagnosed
SAMPLE_24328	SINGLE_3388	SINGLE	agilentV5	HiSeq4000	150	diagnosed
SAMPLE_24329	SINGLE_3389	SINGLE	agilentV4	HiSeq2000	100	diagnosed
SAMPLE_24340	SINGLE_3400	SINGLE	agilentV4	HiSeq2000	100	diagnosed
SAMPLE_24346	SINGLE_3406	SINGLE	agilentV4	HiSeq2000	100	diagnosed
SAMPLE_24347	SINGLE_3407	SINGLE	agilentV4	HiSeq2000	100	diagnosed
SAMPLE_24349	SINGLE_3409	SINGLE	agilentV4	HiSeq2000	100	diagnosed
SAMPLE_24360	SINGLE_3420	SINGLE	agilentV4	HiSeq2000	100	diagnosed
SAMPLE_24364	SINGLE_3424	SINGLE	agilentV4	HiSeq2000	100	diagnosed
SAMPLE_24368	SINGLE_3428	SINGLE	agilentV4	HiSeq2000	100	diagnosed
SAMPLE_2437	TRIO_813	CHILD	agilentV4	HiSeq2000	100	diagnosed
SAMPLE_24374	SINGLE_3434	SINGLE	agilentV5	HiSeq4000	150	diagnosed
SAMPLE_24375	SINGLE_3435	SINGLE	agilentV5	HiSeq2000	100	diagnosed
SAMPLE_24376	SINGLE_3436	SINGLE	agilentV4	HiSeq2000	100	diagnosed
SAMPLE_24393	SINGLE_3453	SINGLE	agilentV4	HiSeq2000	100	diagnosed
SAMPLE_24399	SINGLE_3459	SINGLE	agilentV5	HiSeq2000	100	diagnosed
SAMPLE_24400	SINGLE_3460	SINGLE	agilentV5	HiSeq2000	100	diagnosed
SAMPLE_24404	SINGLE_3464	SINGLE	agilentV4	HiSeq2000	100	diagnosed
SAMPLE_24406	SINGLE_3466	SINGLE	agilentV4	HiSeq2000	100	diagnosed
SAMPLE_24410	SINGLE_3470	SINGLE	agilentV4	HiSeq2000	100	diagnosed
SAMPLE_24411	SINGLE_3471	SINGLE	agilentV5	HiSeq2000	100	diagnosed
SAMPLE_24413	SINGLE_3473	SINGLE	agilentV4	HiSeq2000	100	diagnosed
SAMPLE_24432	SINGLE_3492	SINGLE	agilentV4	HiSeq2000	100	diagnosed
SAMPLE_24434	SINGLE_3494	SINGLE	agilentV5	HiSeq2000	100	diagnosed
SAMPLE_24439	SINGLE_3499	SINGLE	agilentV4	HiSeq2000	100	diagnosed
SAMPLE_24444	SINGLE_3504	SINGLE	agilentV4	HiSeq2000	100	diagnosed
SAMPLE_24447	SINGLE_3507	SINGLE	agilentV4	HiSeq2000	100	diagnosed
SAMPLE_24452	SINGLE_3512	SINGLE	agilentV5	HiSeq2000	100	diagnosed
SAMPLE_24457	SINGLE_3517	SINGLE	agilentV4	HiSeq2000	100	diagnosed
SAMPLE_24468	SINGLE_3528	SINGLE	agilentV5	HiSeq2000	100	diagnosed
SAMPLE_24470	SINGLE_3530	SINGLE	agilentV5	HiSeq2000	100	diagnosed
SAMPLE_24476	SINGLE_3536	SINGLE	agilentV5	HiSeq2000	100	diagnosed
SAMPLE_24482	SINGLE_3542	SINGLE	agilentV5	HiSeq2000	100	diagnosed
SAMPLE_24485	SINGLE_3545	SINGLE	agilentV5	HiSeq2000	100	diagnosed
SAMPLE_24490	SINGLE_3550	SINGLE	agilentV5	HiSeq2000	100	diagnosed
SAMPLE_24495	SINGLE_3555	SINGLE	agilentV5	HiSeq2000	100	diagnosed
SAMPLE_24497	SINGLE_3557	SINGLE	agilentV5	HiSeq2000	100	diagnosed
SAMPLE_24499	SINGLE_3559	SINGLE	agilentV4	HiSeq2000	100	diagnosed
SAMPLE_24503	SINGLE_3563	SINGLE	agilentV5	HiSeq2000	100	diagnosed
SAMPLE_24506	SINGLE_3566	SINGLE	agilentV5	HiSeq2000	100	diagnosed
SAMPLE_24515	SINGLE_3575	SINGLE	agilentV5	HiSeq2000	100	diagnosed
SAMPLE_24517	SINGLE_3577	SINGLE	agilentV5	HiSeq2000	100	diagnosed
SAMPLE_24524	SINGLE_3584	SINGLE	agilentV5	HiSeq2000	100	diagnosed
SAMPLE_24530	SINGLE_3590	SINGLE	agilentV5	HiSeq2000	100	diagnosed
SAMPLE_24532	SINGLE_3592	SINGLE	agilentV5	HiSeq2000	100	diagnosed
SAMPLE_24533	SINGLE_3593	SINGLE	agilentV5	HiSeq2000	100	diagnosed
SAMPLE_24536	SINGLE_3596	SINGLE	agilentV5	HiSeq2000	100	diagnosed
SAMPLE_24539	SINGLE_3599	SINGLE	agilentV5	HiSeq2000	100	diagnosed
SAMPLE_24543	SINGLE_3603	SINGLE	agilentV5	HiSeq2000	100	diagnosed
SAMPLE_24546	SINGLE_3606	SINGLE	agilentV5	HiSeq2000	100	diagnosed
SAMPLE_24557	SINGLE_3617	SINGLE	agilentV5	HiSeq2000	100	diagnosed
SAMPLE_24560	SINGLE_3620	SINGLE	agilentV5	HiSeq2000	100	diagnosed
SAMPLE_24562	SINGLE_3622	SINGLE	agilentV5	HiSeq2000	150	diagnosed
SAMPLE_24564	SINGLE_3624	SINGLE	agilentV5	HiSeq2000	100	diagnosed
SAMPLE_24575	SINGLE_3635	SINGLE	agilentV5	HiSeq2000	100	diagnosed
SAMPLE_24576	SINGLE_3636	SINGLE	agilentV5	HiSeq2000	100	diagnosed
SAMPLE_24588	SINGLE_3648	SINGLE	agilentV5	HiSeq2000	100	diagnosed
SAMPLE_24590	SINGLE_3650	SINGLE	agilentV5	HiSeq2000	100	diagnosed
SAMPLE_24599	SINGLE_3659	SINGLE	agilentV5	HiSeq2000	100	diagnosed
SAMPLE_24600	SINGLE_3660	SINGLE	agilentV5	HiSeq2000	100	diagnosed
SAMPLE_24601	SINGLE_3661	SINGLE	agilentV5	HiSeq2000	100	diagnosed
SAMPLE_24603	SINGLE_3663	SINGLE	agilentV5	HiSeq2000	100	diagnosed
SAMPLE_24609	SINGLE_3669	SINGLE	agilentV5	HiSeq2000	100	diagnosed
SAMPLE_24613	SINGLE_3673	SINGLE	agilentV5	HiSeq2000	100	diagnosed
SAMPLE_24621	SINGLE_3681	SINGLE	agilentV5	HiSeq2000	100	diagnosed
SAMPLE_24628	SINGLE_3688	SINGLE	agilentV5	HiSeq2000	100	diagnosed
SAMPLE_24631	SINGLE_3691	SINGLE	agilentV5	HiSeq2000	100	diagnosed
SAMPLE_24632	SINGLE_3692	SINGLE	agilentV5	HiSeq2000	100	diagnosed
SAMPLE_24637	SINGLE_3697	SINGLE	agilentV5	HiSeq2000	100	diagnosed
SAMPLE_24639	SINGLE_3699	SINGLE	agilentV5	HiSeq2000	100	diagnosed
SAMPLE_24642	SINGLE_3702	SINGLE	agilentV5	HiSeq2000	100	diagnosed
SAMPLE_24646	SINGLE_3706	SINGLE	agilentV5	HiSeq2000	100	diagnosed
SAMPLE_24647	SINGLE_3707	SINGLE	agilentV5	HiSeq2000	100	diagnosed
SAMPLE_24650	SINGLE_3710	SINGLE	agilentV5	HiSeq2000	100	diagnosed
SAMPLE_24663	SINGLE_3723	SINGLE	agilentV5	HiSeq2000	100	diagnosed
SAMPLE_24676	SINGLE_3736	SINGLE	agilentV5	HiSeq2000	100	diagnosed
SAMPLE_24680	SINGLE_3740	SINGLE	agilentV5	HiSeq2000	100	diagnosed
SAMPLE_24690	SINGLE_3750	SINGLE	agilentV5	HiSeq2000	100	diagnosed
SAMPLE_24695	SINGLE_3755	SINGLE	agilentV5	HiSeq2000	100	diagnosed
SAMPLE_247	TRIO_83	CHILD	agilentV4	HiSeq2000	100	diagnosed
SAMPLE_24704	SINGLE_3764	SINGLE	agilentV5	HiSeq2000	100	diagnosed
SAMPLE_24705	SINGLE_3765	SINGLE	agilentV5	HiSeq2000	100	diagnosed
SAMPLE_24706	SINGLE_3766	SINGLE	agilentV5	HiSeq2000	100	diagnosed
SAMPLE_24711	SINGLE_3771	SINGLE	agilentV5	HiSeq2000	100	diagnosed
SAMPLE_24714	SINGLE_3774	SINGLE	agilentV5	HiSeq2000	100	diagnosed
SAMPLE_24724	SINGLE_3784	SINGLE	agilentV5	HiSeq2000	100	diagnosed
SAMPLE_24725	SINGLE_3785	SINGLE	agilentV5	HiSeq2000	100	diagnosed
SAMPLE_24728	SINGLE_3788	SINGLE	agilentV5	HiSeq2000	100	diagnosed
SAMPLE_24734	SINGLE_3794	SINGLE	agilentV5	HiSeq2000	100	diagnosed
SAMPLE_24736	SINGLE_3796	SINGLE	agilentV5	HiSeq4000	150	diagnosed
SAMPLE_24737	SINGLE_3797	SINGLE	agilentV5	HiSeq2000	100	diagnosed
SAMPLE_24738	SINGLE_3798	SINGLE	agilentV5	HiSeq2000	100	diagnosed
SAMPLE_24745	SINGLE_3805	SINGLE	agilentV5	HiSeq2000	100	diagnosed
SAMPLE_24747	SINGLE_3807	SINGLE	agilentV5	HiSeq2000	100	diagnosed
SAMPLE_24750	SINGLE_3810	SINGLE	agilentV5	HiSeq2000	100	diagnosed
SAMPLE_24763	SINGLE_3823	SINGLE	agilentV5	HiSeq2000	100	diagnosed
SAMPLE_24765	SINGLE_3825	SINGLE	agilentV5	HiSeq2000	100	diagnosed
SAMPLE_24768	SINGLE_3828	SINGLE	agilentV5	HiSeq2000	100	diagnosed
SAMPLE_24773	SINGLE_3833	SINGLE	agilentV5	HiSeq2000	100	diagnosed
SAMPLE_24796	SINGLE_3856	SINGLE	agilentV5	HiSeq2000	100	diagnosed
SAMPLE_24797	SINGLE_3857	SINGLE	agilentV5	HiSeq2000	100	diagnosed
SAMPLE_24799	SINGLE_3859	SINGLE	agilentV5	HiSeq4000	150	diagnosed
SAMPLE_24803	SINGLE_3863	SINGLE	agilentV5	HiSeq2000	100	diagnosed
SAMPLE_24807	SINGLE_3867	SINGLE	agilentV5	HiSeq2000	100	diagnosed
SAMPLE_24809	SINGLE_3869	SINGLE	agilentV5	HiSeq4000	150	diagnosed
SAMPLE_24811	SINGLE_3871	SINGLE	agilentV5	HiSeq2000	100	diagnosed
SAMPLE_24820	SINGLE_3880	SINGLE	agilentV5	HiSeq2000	100	diagnosed
SAMPLE_24826	SINGLE_3886	SINGLE	agilentV5	HiSeq2000	100	diagnosed
SAMPLE_24828	SINGLE_3888	SINGLE	agilentV5	HiSeq2000	100	diagnosed
SAMPLE_24831	SINGLE_3891	SINGLE	agilentV5	HiSeq2000	100	diagnosed
SAMPLE_24850	SINGLE_3910	SINGLE	agilentV5	HiSeq2000	100	diagnosed
SAMPLE_24853	SINGLE_3913	SINGLE	agilentV5	HiSeq2000	100	diagnosed
SAMPLE_24854	SINGLE_3914	SINGLE	agilentV5	HiSeq2000	100	diagnosed
SAMPLE_24856	SINGLE_3916	SINGLE	agilentV5	HiSeq2000	100	diagnosed
SAMPLE_24857	SINGLE_3917	SINGLE	agilentV5	HiSeq2000	100	diagnosed
SAMPLE_24859	SINGLE_3919	SINGLE	agilentV5	HiSeq2000	100	diagnosed
SAMPLE_24860	SINGLE_3920	SINGLE	agilentV5	HiSeq2000	100	diagnosed
SAMPLE_24864	SINGLE_3924	SINGLE	agilentV5	HiSeq2000	100	diagnosed
SAMPLE_24865	SINGLE_3925	SINGLE	agilentV5	HiSeq2000	100	diagnosed
SAMPLE_24871	SINGLE_3931	SINGLE	agilentV5	HiSeq2000	100	diagnosed
SAMPLE_24894	SINGLE_3954	SINGLE	agilentV5	HiSeq2000	100	diagnosed
SAMPLE_24897	SINGLE_3957	SINGLE	agilentV5	HiSeq4000	150	diagnosed
SAMPLE_24900	SINGLE_3960	SINGLE	agilentV5	HiSeq4000	150	diagnosed
SAMPLE_24905	SINGLE_3965	SINGLE	agilentV5	HiSeq2000	100	diagnosed
SAMPLE_24909	SINGLE_3969	SINGLE	agilentV5	HiSeq2000	100	diagnosed
SAMPLE_24910	SINGLE_3970	SINGLE	agilentV5	HiSeq2000	100	diagnosed
SAMPLE_24913	SINGLE_3973	SINGLE	agilentV5	HiSeq2000	100	diagnosed
SAMPLE_24914	SINGLE_3974	SINGLE	agilentV5	HiSeq2000	100	diagnosed
SAMPLE_24915	SINGLE_3975	SINGLE	agilentV5	HiSeq2000	100	diagnosed
SAMPLE_24921	SINGLE_3981	SINGLE	agilentV5	HiSeq2000	100	diagnosed
SAMPLE_24923	SINGLE_3983	SINGLE	agilentV5	HiSeq2000	100	diagnosed
SAMPLE_24924	SINGLE_3984	SINGLE	agilentV5	HiSeq2000	100	diagnosed
SAMPLE_24925	SINGLE_3985	SINGLE	agilentV5	HiSeq2000	100	diagnosed
SAMPLE_24927	SINGLE_3987	SINGLE	agilentV5	HiSeq2000	100	diagnosed
SAMPLE_24929	SINGLE_3989	SINGLE	agilentV5	HiSeq2000	100	diagnosed
SAMPLE_24931	SINGLE_3991	SINGLE	agilentV5	HiSeq2000	100	diagnosed
SAMPLE_24935	SINGLE_3995	SINGLE	agilentV5	HiSeq2000	100	diagnosed
SAMPLE_24936	SINGLE_3996	SINGLE	agilentV5	HiSeq2000	100	diagnosed
SAMPLE_24938	SINGLE_3998	SINGLE	agilentV5	HiSeq2000	100	diagnosed
SAMPLE_24940	SINGLE_4000	SINGLE	agilentV5	HiSeq2000	100	diagnosed
SAMPLE_24942	SINGLE_4002	SINGLE	agilentV5	HiSeq2000	100	diagnosed
SAMPLE_24946	SINGLE_4006	SINGLE	agilentV5	HiSeq2000	100	diagnosed
SAMPLE_24960	SINGLE_4020	SINGLE	agilentV5	HiSeq2000	100	diagnosed
SAMPLE_24965	SINGLE_4025	SINGLE	agilentV5	HiSeq2000	100	diagnosed
SAMPLE_24966	SINGLE_4026	SINGLE	agilentV5	HiSeq2000	100	diagnosed
SAMPLE_24973	SINGLE_4033	SINGLE	agilentV5	HiSeq2000	100	diagnosed
SAMPLE_24976	SINGLE_4036	SINGLE	agilentV5	HiSeq2000	100	diagnosed
SAMPLE_24981	SINGLE_4041	SINGLE	agilentV5	HiSeq2000	100	diagnosed
SAMPLE_24985	SINGLE_4045	SINGLE	agilentV5	HiSeq2000	100	diagnosed
SAMPLE_24988	SINGLE_4048	SINGLE	agilentV5	HiSeq2000	100	diagnosed
SAMPLE_25000	SINGLE_4060	SINGLE	agilentV5	HiSeq4000	150	diagnosed
SAMPLE_25003	SINGLE_4063	SINGLE	agilentV5	HiSeq2000	100	diagnosed
SAMPLE_25011	SINGLE_4071	SINGLE	agilentV5	HiSeq2000	100	diagnosed
SAMPLE_25016	SINGLE_4076	SINGLE	agilentV5	HiSeq2000	100	diagnosed
SAMPLE_25025	SINGLE_4085	SINGLE	agilentV5	HiSeq2000	100	diagnosed
SAMPLE_25026	SINGLE_4086	SINGLE	agilentV5	HiSeq2000	100	diagnosed
SAMPLE_25033	SINGLE_4093	SINGLE	agilentV5	HiSeq2000	100	diagnosed
SAMPLE_25039	SINGLE_4099	SINGLE	agilentV5	HiSeq4000	150	diagnosed
SAMPLE_25042	SINGLE_4102	SINGLE	agilentV5	HiSeq4000	150	diagnosed
SAMPLE_25048	SINGLE_4108	SINGLE	agilentV5	HiSeq4000	150	diagnosed
SAMPLE_25058	SINGLE_4118	SINGLE	agilentV5	HiSeq2000	100	diagnosed
SAMPLE_25059	SINGLE_4119	SINGLE	agilentV5	HiSeq2000	100	diagnosed
SAMPLE_25067	SINGLE_4127	SINGLE	agilentV5	HiSeq2000	100	diagnosed
SAMPLE_25071	SINGLE_4131	SINGLE	agilentV5	HiSeq2000	100	diagnosed
SAMPLE_25079	SINGLE_4139	SINGLE	agilentV5	HiSeq2000	100	diagnosed
SAMPLE_25081	SINGLE_4141	SINGLE	agilentV5	HiSeq2000	100	diagnosed
SAMPLE_25082	SINGLE_4142	SINGLE	agilentV5	HiSeq2000	100	diagnosed
SAMPLE_25083	SINGLE_4143	SINGLE	agilentV5	HiSeq2000	100	diagnosed
SAMPLE_25084	SINGLE_4144	SINGLE	agilentV5	HiSeq2000	100	diagnosed
SAMPLE_25085	SINGLE_4145	SINGLE	agilentV5	HiSeq2000	100	diagnosed
SAMPLE_25087	SINGLE_4147	SINGLE	agilentV5	HiSeq2000	100	diagnosed
SAMPLE_25089	SINGLE_4149	SINGLE	agilentV5	HiSeq2000	100	diagnosed
SAMPLE_25093	SINGLE_4153	SINGLE	agilentV5	HiSeq2000	100	diagnosed
SAMPLE_25094	SINGLE_4154	SINGLE	agilentV5	HiSeq2000	100	diagnosed
SAMPLE_25096	SINGLE_4156	SINGLE	agilentV5	HiSeq2000	100	diagnosed
SAMPLE_25099	SINGLE_4159	SINGLE	agilentV5	HiSeq2000	100	diagnosed
SAMPLE_25100	SINGLE_4160	SINGLE	agilentV5	HiSeq2000	100	diagnosed
SAMPLE_25102	SINGLE_4162	SINGLE	agilentV5	HiSeq2000	100	diagnosed
SAMPLE_25106	SINGLE_4166	SINGLE	agilentV5	HiSeq2000	100	diagnosed
SAMPLE_25107	SINGLE_4167	SINGLE	agilentV5	HiSeq2000	100	diagnosed
SAMPLE_25111	SINGLE_4171	SINGLE	agilentV5	HiSeq2000	100	diagnosed
SAMPLE_25113	SINGLE_4173	SINGLE	agilentV5	HiSeq2000	100	diagnosed
SAMPLE_25117	SINGLE_4177	SINGLE	agilentV5	HiSeq2000	100	diagnosed
SAMPLE_25121	SINGLE_4181	SINGLE	agilentV5	HiSeq2000	100	diagnosed
SAMPLE_25122	SINGLE_4182	SINGLE	agilentV5	HiSeq2000	100	diagnosed
SAMPLE_25123	SINGLE_4183	SINGLE	agilentV5	HiSeq2000	100	diagnosed
SAMPLE_25125	SINGLE_4185	SINGLE	agilentV5	HiSeq2000	100	diagnosed
SAMPLE_25126	SINGLE_4186	SINGLE	agilentV5	HiSeq2000	100	diagnosed
SAMPLE_25130	SINGLE_4190	SINGLE	agilentV5	HiSeq2000	100	diagnosed
SAMPLE_25137	SINGLE_4197	SINGLE	agilentV5	HiSeq2000	100	diagnosed
SAMPLE_25141	SINGLE_4201	SINGLE	agilentV5	HiSeq2000	100	diagnosed
SAMPLE_25143	SINGLE_4203	SINGLE	agilentV5	HiSeq2000	100	diagnosed
SAMPLE_25145	SINGLE_4205	SINGLE	agilentV5	HiSeq2000	100	diagnosed
SAMPLE_25147	SINGLE_4207	SINGLE	agilentV5	HiSeq2000	100	diagnosed
SAMPLE_25152	SINGLE_4212	SINGLE	agilentV5	HiSeq2000	100	diagnosed
SAMPLE_25154	SINGLE_4214	SINGLE	agilentV5	HiSeq2000	100	diagnosed
SAMPLE_25157	SINGLE_4217	SINGLE	agilentV5	HiSeq2000	100	diagnosed
SAMPLE_25158	SINGLE_4218	SINGLE	agilentV5	HiSeq2000	100	diagnosed
SAMPLE_25163	SINGLE_4223	SINGLE	agilentV5	HiSeq2000	100	diagnosed
SAMPLE_25165	SINGLE_4225	SINGLE	agilentV5	HiSeq2000	100	diagnosed
SAMPLE_25168	SINGLE_4228	SINGLE	agilentV5	HiSeq2000	100	diagnosed
SAMPLE_25176	SINGLE_4236	SINGLE	agilentV5	HiSeq4000	150	diagnosed
SAMPLE_2518	TRIO_840	CHILD	agilentV4	HiSeq2000	100	diagnosed
SAMPLE_25203	SINGLE_4263	SINGLE	agilentV5	HiSeq2000	100	diagnosed
SAMPLE_25204	SINGLE_4264	SINGLE	agilentV5	HiSeq2000	100	diagnosed
SAMPLE_25205	SINGLE_4265	SINGLE	agilentV5	HiSeq4000	150	diagnosed
SAMPLE_25206	SINGLE_4266	SINGLE	agilentV5	HiSeq4000	150	diagnosed
SAMPLE_25209	SINGLE_4269	SINGLE	agilentV5	HiSeq2000	100	diagnosed
SAMPLE_25215	SINGLE_4275	SINGLE	agilentV5	HiSeq2000	100	diagnosed
SAMPLE_25218	SINGLE_4278	SINGLE	agilentV5	HiSeq2000	100	diagnosed
SAMPLE_25220	SINGLE_4280	SINGLE	agilentV5	HiSeq2000	100	diagnosed
SAMPLE_25225	SINGLE_4285	SINGLE	agilentV5	HiSeq2000	100	diagnosed
SAMPLE_25233	SINGLE_4293	SINGLE	agilentV5	HiSeq2000	100	diagnosed
SAMPLE_25241	SINGLE_4301	SINGLE	agilentV5	HiSeq2000	100	diagnosed
SAMPLE_25245	SINGLE_4305	SINGLE	agilentV5	HiSeq2000	100	diagnosed
SAMPLE_25250	SINGLE_4310	SINGLE	agilentV5	HiSeq2000	100	diagnosed
SAMPLE_25252	SINGLE_4312	SINGLE	agilentV5	HiSeq2000	100	diagnosed
SAMPLE_25256	SINGLE_4316	SINGLE	agilentV5	HiSeq2000	100	diagnosed
SAMPLE_25261	SINGLE_4321	SINGLE	agilentV5	HiSeq2000	100	diagnosed
SAMPLE_25270	SINGLE_4330	SINGLE	agilentV5	HiSeq2000	100	diagnosed
SAMPLE_25274	SINGLE_4334	SINGLE	agilentV5	HiSeq2000	100	diagnosed
SAMPLE_25275	SINGLE_4335	SINGLE	agilentV5	HiSeq2000	100	diagnosed
SAMPLE_25278	SINGLE_4338	SINGLE	agilentV5	HiSeq2000	100	diagnosed
SAMPLE_25280	SINGLE_4340	SINGLE	agilentV5	HiSeq4000	150	diagnosed
SAMPLE_25282	SINGLE_4342	SINGLE	agilentV5	HiSeq2000	100	diagnosed
SAMPLE_25288	SINGLE_4348	SINGLE	agilentV5	HiSeq2000	100	diagnosed
SAMPLE_25290	SINGLE_4350	SINGLE	agilentV5	HiSeq2000	100	diagnosed
SAMPLE_25292	SINGLE_4352	SINGLE	agilentV5	HiSeq2000	100	diagnosed
SAMPLE_25294	SINGLE_4354	SINGLE	agilentV5	HiSeq2000	100	diagnosed
SAMPLE_25298	SINGLE_4358	SINGLE	agilentV5	HiSeq2000	100	diagnosed
SAMPLE_25299	SINGLE_4359	SINGLE	agilentV5	HiSeq2000	100	diagnosed
SAMPLE_25300	SINGLE_4360	SINGLE	agilentV5	HiSeq2000	100	diagnosed
SAMPLE_25304	SINGLE_4364	SINGLE	agilentV5	HiSeq2000	100	diagnosed
SAMPLE_25317	SINGLE_4377	SINGLE	agilentV5	HiSeq2000	100	diagnosed
SAMPLE_25321	SINGLE_4381	SINGLE	agilentV5	HiSeq2000	100	diagnosed
SAMPLE_25329	SINGLE_4389	SINGLE	agilentV5	HiSeq2000	100	diagnosed
SAMPLE_2533	TRIO_845	CHILD	agilentV4	HiSeq2000	100	diagnosed
SAMPLE_25331	SINGLE_4391	SINGLE	agilentV5	HiSeq2000	100	diagnosed
SAMPLE_25342	SINGLE_4402	SINGLE	agilentV5	HiSeq2000	100	diagnosed
SAMPLE_25346	SINGLE_4406	SINGLE	agilentV5	HiSeq2000	100	diagnosed
SAMPLE_25347	SINGLE_4407	SINGLE	agilentV5	HiSeq4000	150	diagnosed
SAMPLE_25348	SINGLE_4408	SINGLE	agilentV5	HiSeq2000	100	diagnosed
SAMPLE_25350	SINGLE_4410	SINGLE	agilentV5	HiSeq2000	100	diagnosed
SAMPLE_25352	SINGLE_4412	SINGLE	agilentV5	HiSeq2000	100	diagnosed
SAMPLE_25358	SINGLE_4418	SINGLE	agilentV5	HiSeq2000	100	diagnosed
SAMPLE_25359	SINGLE_4419	SINGLE	agilentV5	HiSeq2000	100	diagnosed
SAMPLE_25363	SINGLE_4423	SINGLE	agilentV5	HiSeq4000	150	diagnosed
SAMPLE_25367	SINGLE_4427	SINGLE	agilentV5	HiSeq4000	150	diagnosed
SAMPLE_25368	SINGLE_4428	SINGLE	agilentV5	HiSeq2000	100	diagnosed
SAMPLE_25370	SINGLE_4430	SINGLE	agilentV5	HiSeq2000	100	diagnosed
SAMPLE_25374	SINGLE_4434	SINGLE	agilentV5	HiSeq2000	100	diagnosed
SAMPLE_25375	SINGLE_4435	SINGLE	agilentV5	HiSeq2000	100	diagnosed
SAMPLE_25378	SINGLE_4438	SINGLE	agilentV5	HiSeq2000	100	diagnosed
SAMPLE_25383	SINGLE_4443	SINGLE	agilentV5	HiSeq2000	100	diagnosed
SAMPLE_25388	SINGLE_4448	SINGLE	agilentV5	HiSeq2000	100	diagnosed
SAMPLE_25395	SINGLE_4455	SINGLE	agilentV5	HiSeq2000	100	diagnosed
SAMPLE_25397	SINGLE_4457	SINGLE	agilentV5	HiSeq2000	100	diagnosed
SAMPLE_25401	SINGLE_4461	SINGLE	agilentV5	HiSeq4000	150	diagnosed
SAMPLE_25402	SINGLE_4462	SINGLE	agilentV5	HiSeq2000	100	diagnosed
SAMPLE_25406	SINGLE_4466	SINGLE	agilentV5	HiSeq2000	100	diagnosed
SAMPLE_25407	SINGLE_4467	SINGLE	agilentV5	HiSeq2000	100	diagnosed
SAMPLE_25415	SINGLE_4475	SINGLE	agilentV5	HiSeq2000	100	diagnosed
SAMPLE_25417	SINGLE_4477	SINGLE	agilentV5	HiSeq4000	150	diagnosed
SAMPLE_25421	SINGLE_4481	SINGLE	agilentV5	HiSeq2000	100	diagnosed
SAMPLE_25427	SINGLE_4487	SINGLE	agilentV5	HiSeq2000	100	diagnosed
SAMPLE_25433	SINGLE_4493	SINGLE	agilentV5	HiSeq2000	100	diagnosed
SAMPLE_25434	SINGLE_4494	SINGLE	agilentV5	HiSeq2000	100	diagnosed
SAMPLE_25436	SINGLE_4496	SINGLE	agilentV5	HiSeq4000	150	diagnosed
SAMPLE_2545	TRIO_849	CHILD	agilentV4	HiSeq2000	100	diagnosed
SAMPLE_25454	SINGLE_4514	SINGLE	agilentV5	HiSeq2000	100	diagnosed
SAMPLE_25472	SINGLE_4532	SINGLE	agilentV5	HiSeq2000	100	diagnosed
SAMPLE_25484	SINGLE_4544	SINGLE	agilentV5	HiSeq2000	100	diagnosed
SAMPLE_25485	SINGLE_4545	SINGLE	agilentV5	HiSeq2000	100	diagnosed
SAMPLE_25487	SINGLE_4547	SINGLE	agilentV5	HiSeq2000	100	diagnosed
SAMPLE_25489	SINGLE_4549	SINGLE	agilentV5	HiSeq2000	100	diagnosed
SAMPLE_25493	SINGLE_4553	SINGLE	agilentV5	HiSeq2000	100	diagnosed
SAMPLE_25494	SINGLE_4554	SINGLE	agilentV5	HiSeq4000	150	diagnosed
SAMPLE_25504	SINGLE_4564	SINGLE	agilentV5	HiSeq4000	150	diagnosed
SAMPLE_25507	SINGLE_4567	SINGLE	agilentV5	HiSeq4000	150	diagnosed
SAMPLE_25509	SINGLE_4569	SINGLE	agilentV5	HiSeq2000	100	diagnosed
SAMPLE_25513	SINGLE_4573	SINGLE	agilentV5	HiSeq2000	100	diagnosed
SAMPLE_25515	SINGLE_4575	SINGLE	agilentV5	HiSeq4000	150	diagnosed
SAMPLE_25516	SINGLE_4576	SINGLE	agilentV5	HiSeq2000	100	diagnosed
SAMPLE_25522	SINGLE_4582	SINGLE	agilentV5	HiSeq2000	100	diagnosed
SAMPLE_25526	SINGLE_4586	SINGLE	agilentV5	HiSeq2000	100	diagnosed
SAMPLE_25532	SINGLE_4592	SINGLE	agilentV5	HiSeq2000	100	diagnosed
SAMPLE_25534	SINGLE_4594	SINGLE	agilentV5	HiSeq2000	100	diagnosed
SAMPLE_25541	SINGLE_4601	SINGLE	agilentV5	HiSeq2000	100	diagnosed
SAMPLE_25547	SINGLE_4607	SINGLE	agilentV5	HiSeq2000	100	diagnosed
SAMPLE_25552	SINGLE_4612	SINGLE	agilentV5	HiSeq2000	100	diagnosed
SAMPLE_25555	SINGLE_4615	SINGLE	agilentV5	HiSeq2000	100	diagnosed
SAMPLE_25561	SINGLE_4621	SINGLE	agilentV5	HiSeq4000	150	diagnosed
SAMPLE_25562	SINGLE_4622	SINGLE	agilentV5	HiSeq2000	100	diagnosed
SAMPLE_25564	SINGLE_4624	SINGLE	agilentV5	HiSeq2000	100	diagnosed
SAMPLE_25566	SINGLE_4626	SINGLE	agilentV5	HiSeq2000	100	diagnosed
SAMPLE_25568	SINGLE_4628	SINGLE	agilentV5	HiSeq2000	100	diagnosed
SAMPLE_2557	TRIO_853	CHILD	agilentV5	HiSeq4000	150	diagnosed
SAMPLE_25571	SINGLE_4631	SINGLE	agilentV5	HiSeq2000	100	diagnosed
SAMPLE_25573	SINGLE_4633	SINGLE	agilentV5	HiSeq2000	100	diagnosed
SAMPLE_25576	SINGLE_4636	SINGLE	agilentV5	HiSeq2000	100	diagnosed
SAMPLE_25579	SINGLE_4639	SINGLE	agilentV5	HiSeq2000	100	diagnosed
SAMPLE_25580	SINGLE_4640	SINGLE	agilentV5	HiSeq2000	100	diagnosed
SAMPLE_25582	SINGLE_4642	SINGLE	agilentV5	HiSeq4000	150	diagnosed
SAMPLE_25587	SINGLE_4647	SINGLE	agilentV5	HiSeq2000	100	diagnosed
SAMPLE_25594	SINGLE_4654	SINGLE	agilentV5	HiSeq2000	100	diagnosed
SAMPLE_25596	SINGLE_4656	SINGLE	agilentV5	HiSeq2000	100	diagnosed
SAMPLE_25597	SINGLE_4657	SINGLE	agilentV5	HiSeq2000	100	diagnosed
SAMPLE_25598	SINGLE_4658	SINGLE	agilentV5	HiSeq2000	100	diagnosed
SAMPLE_25599	SINGLE_4659	SINGLE	agilentV5	HiSeq2000	100	diagnosed
SAMPLE_25602	SINGLE_4662	SINGLE	agilentV5	HiSeq2000	100	diagnosed
SAMPLE_25603	SINGLE_4663	SINGLE	agilentV5	HiSeq2000	100	diagnosed
SAMPLE_25604	SINGLE_4664	SINGLE	agilentV5	HiSeq2000	100	diagnosed
SAMPLE_25608	SINGLE_4668	SINGLE	agilentV5	HiSeq2000	100	diagnosed
SAMPLE_25620	SINGLE_4680	SINGLE	agilentV5	HiSeq2000	100	diagnosed
SAMPLE_25637	SINGLE_4697	SINGLE	agilentV5	HiSeq2000	100	diagnosed
SAMPLE_25639	SINGLE_4699	SINGLE	agilentV5	HiSeq2000	100	diagnosed
SAMPLE_25646	SINGLE_4706	SINGLE	agilentV5	HiSeq2000	100	diagnosed
SAMPLE_25647	SINGLE_4707	SINGLE	agilentV5	HiSeq2000	100	diagnosed
SAMPLE_25658	SINGLE_4718	SINGLE	agilentV5	HiSeq2000	100	diagnosed
SAMPLE_25664	SINGLE_4724	SINGLE	agilentV5	HiSeq2000	100	diagnosed
SAMPLE_25667	SINGLE_4727	SINGLE	agilentV5	HiSeq4000	150	diagnosed
SAMPLE_25673	SINGLE_4733	SINGLE	agilentV5	HiSeq2000	100	diagnosed
SAMPLE_25683	SINGLE_4743	SINGLE	agilentV5	HiSeq2000	100	diagnosed
SAMPLE_25686	SINGLE_4746	SINGLE	agilentV5	HiSeq2000	100	diagnosed
SAMPLE_25687	SINGLE_4747	SINGLE	agilentV5	HiSeq2000	100	diagnosed
SAMPLE_25690	SINGLE_4750	SINGLE	agilentV5	HiSeq4000	150	diagnosed
SAMPLE_25691	SINGLE_4751	SINGLE	agilentV5	HiSeq2000	100	diagnosed
SAMPLE_25693	SINGLE_4753	SINGLE	agilentV5	HiSeq4000	150	diagnosed
SAMPLE_25696	SINGLE_4756	SINGLE	agilentV5	HiSeq4000	150	diagnosed
SAMPLE_25698	SINGLE_4758	SINGLE	agilentV5	HiSeq4000	150	diagnosed
SAMPLE_25703	SINGLE_4763	SINGLE	agilentV5	HiSeq4000	150	diagnosed
SAMPLE_25704	SINGLE_4764	SINGLE	agilentV5	HiSeq4000	150	diagnosed
SAMPLE_25706	SINGLE_4766	SINGLE	agilentV5	HiSeq4000	150	diagnosed
SAMPLE_25722	SINGLE_4782	SINGLE	agilentV5	HiSeq4000	150	diagnosed
SAMPLE_25723	SINGLE_4783	SINGLE	agilentV5	HiSeq4000	150	diagnosed
SAMPLE_25725	SINGLE_4785	SINGLE	agilentV5	HiSeq4000	150	diagnosed
SAMPLE_25733	SINGLE_4793	SINGLE	agilentV5	HiSeq4000	150	diagnosed
SAMPLE_25748	SINGLE_4808	SINGLE	agilentV5	HiSeq4000	150	diagnosed
SAMPLE_2575	TRIO_859	CHILD	agilentV4	HiSeq2000	100	diagnosed
SAMPLE_25752	SINGLE_4812	SINGLE	agilentV5	HiSeq4000	150	diagnosed
SAMPLE_25753	SINGLE_4813	SINGLE	agilentV5	HiSeq4000	150	diagnosed
SAMPLE_25760	SINGLE_4820	SINGLE	agilentV5	HiSeq4000	150	diagnosed
SAMPLE_25769	SINGLE_4829	SINGLE	agilentV5	HiSeq4000	150	diagnosed
SAMPLE_25778	SINGLE_4838	SINGLE	agilentV5	HiSeq4000	150	diagnosed
SAMPLE_25783	SINGLE_4843	SINGLE	agilentV5	HiSeq4000	150	diagnosed
SAMPLE_25786	SINGLE_4846	SINGLE	agilentV5	HiSeq4000	150	diagnosed
SAMPLE_25792	SINGLE_4852	SINGLE	agilentV5	HiSeq4000	150	diagnosed
SAMPLE_25812	SINGLE_4872	SINGLE	agilentV5	HiSeq4000	150	diagnosed
SAMPLE_25816	SINGLE_4876	SINGLE	agilentV5	HiSeq4000	150	diagnosed
SAMPLE_25820	SINGLE_4880	SINGLE	agilentV5	HiSeq4000	150	diagnosed
SAMPLE_25821	SINGLE_4881	SINGLE	agilentV5	HiSeq4000	150	diagnosed
SAMPLE_25822	SINGLE_4882	SINGLE	agilentV5	HiSeq4000	150	diagnosed
SAMPLE_25824	SINGLE_4884	SINGLE	agilentV5	HiSeq4000	150	diagnosed
SAMPLE_25833	SINGLE_4893	SINGLE	agilentV5	HiSeq4000	150	diagnosed
SAMPLE_25840	SINGLE_4900	SINGLE	agilentV5	HiSeq4000	150	diagnosed
SAMPLE_25845	SINGLE_4905	SINGLE	agilentV5	HiSeq4000	150	diagnosed
SAMPLE_25847	SINGLE_4907	SINGLE	agilentV5	HiSeq4000	150	diagnosed
SAMPLE_25853	SINGLE_4913	SINGLE	agilentV5	HiSeq4000	150	diagnosed
SAMPLE_25858	SINGLE_4918	SINGLE	agilentV5	HiSeq4000	150	diagnosed
SAMPLE_25861	SINGLE_4921	SINGLE	agilentV5	HiSeq4000	150	diagnosed
SAMPLE_25865	SINGLE_4925	SINGLE	agilentV5	HiSeq4000	150	diagnosed
SAMPLE_25866	SINGLE_4926	SINGLE	agilentV5	HiSeq4000	150	diagnosed
SAMPLE_2587	TRIO_863	CHILD	agilentV4	HiSeq2000	100	diagnosed
SAMPLE_25875	SINGLE_4935	SINGLE	agilentV5	HiSeq4000	150	diagnosed
SAMPLE_25877	SINGLE_4937	SINGLE	agilentV5	HiSeq4000	150	diagnosed
SAMPLE_25883	SINGLE_4943	SINGLE	agilentV5	HiSeq4000	150	diagnosed
SAMPLE_25888	SINGLE_4948	SINGLE	agilentV5	HiSeq4000	150	diagnosed
SAMPLE_25908	SINGLE_4968	SINGLE	agilentV5	HiSeq4000	150	diagnosed
SAMPLE_25909	SINGLE_4969	SINGLE	agilentV5	HiSeq4000	150	diagnosed
SAMPLE_25913	SINGLE_4973	SINGLE	agilentV5	HiSeq4000	150	diagnosed
SAMPLE_25918	SINGLE_4978	SINGLE	agilentV5	HiSeq4000	150	diagnosed
SAMPLE_25924	SINGLE_4984	SINGLE	agilentV5	HiSeq4000	150	diagnosed
SAMPLE_25925	SINGLE_4985	SINGLE	agilentV5	HiSeq4000	150	diagnosed
SAMPLE_25926	SINGLE_4986	SINGLE	agilentV5	HiSeq4000	150	diagnosed
SAMPLE_25941	SINGLE_5001	SINGLE	agilentV5	HiSeq4000	150	diagnosed
SAMPLE_25945	SINGLE_5005	SINGLE	agilentV5	HiSeq4000	150	diagnosed
SAMPLE_25948	SINGLE_5008	SINGLE	agilentV5	HiSeq4000	150	diagnosed
SAMPLE_25950	SINGLE_5010	SINGLE	agilentV5	HiSeq4000	150	diagnosed
SAMPLE_25952	SINGLE_5012	SINGLE	agilentV5	HiSeq4000	150	diagnosed
SAMPLE_25954	SINGLE_5014	SINGLE	agilentV5	HiSeq4000	150	diagnosed
SAMPLE_25957	SINGLE_5017	SINGLE	agilentV5	HiSeq4000	150	diagnosed
SAMPLE_25958	SINGLE_5018	SINGLE	agilentV5	HiSeq4000	150	diagnosed
SAMPLE_2596	TRIO_866	CHILD	agilentV4	HiSeq2000	100	diagnosed
SAMPLE_25961	SINGLE_5021	SINGLE	agilentV5	HiSeq4000	150	diagnosed
SAMPLE_25962	SINGLE_5022	SINGLE	agilentV5	HiSeq4000	150	diagnosed
SAMPLE_25963	SINGLE_5023	SINGLE	agilentV5	HiSeq4000	150	diagnosed
SAMPLE_25965	SINGLE_5025	SINGLE	agilentV5	HiSeq4000	150	diagnosed
SAMPLE_25967	SINGLE_5027	SINGLE	agilentV5	HiSeq4000	150	diagnosed
SAMPLE_25974	SINGLE_5034	SINGLE	agilentV5	HiSeq4000	150	diagnosed
SAMPLE_25978	SINGLE_5038	SINGLE	agilentV5	HiSeq4000	150	diagnosed
SAMPLE_25990	SINGLE_5050	SINGLE	agilentV5	HiSeq4000	150	diagnosed
SAMPLE_25991	SINGLE_5051	SINGLE	agilentV5	HiSeq4000	150	diagnosed
SAMPLE_26005	SINGLE_5065	SINGLE	agilentV5	HiSeq4000	150	diagnosed
SAMPLE_26011	SINGLE_5071	SINGLE	agilentV5	HiSeq4000	150	diagnosed
SAMPLE_26014	SINGLE_5074	SINGLE	agilentV5	HiSeq4000	150	diagnosed
SAMPLE_2602	TRIO_868	CHILD	agilentV4	HiSeq2000	100	diagnosed
SAMPLE_26023	SINGLE_5083	SINGLE	agilentV5	HiSeq4000	150	diagnosed
SAMPLE_26035	SINGLE_5095	SINGLE	agilentV5	HiSeq4000	150	diagnosed
SAMPLE_26036	SINGLE_5096	SINGLE	agilentV5	HiSeq4000	150	diagnosed
SAMPLE_26040	SINGLE_5100	SINGLE	agilentV5	HiSeq4000	150	diagnosed
SAMPLE_26041	SINGLE_5101	SINGLE	agilentV5	HiSeq4000	150	diagnosed
SAMPLE_26042	SINGLE_5102	SINGLE	agilentV5	HiSeq4000	150	diagnosed
SAMPLE_26045	SINGLE_5105	SINGLE	agilentV5	HiSeq4000	150	diagnosed
SAMPLE_26051	SINGLE_5111	SINGLE	agilentV5	HiSeq4000	150	diagnosed
SAMPLE_26066	SINGLE_5126	SINGLE	agilentV5	HiSeq4000	150	diagnosed
SAMPLE_26073	SINGLE_5133	SINGLE	agilentV5	HiSeq4000	150	diagnosed
SAMPLE_26075	SINGLE_5135	SINGLE	agilentV5	HiSeq4000	150	diagnosed
SAMPLE_26078	SINGLE_5138	SINGLE	agilentV5	HiSeq4000	150	diagnosed
SAMPLE_26079	SINGLE_5139	SINGLE	agilentV5	HiSeq4000	150	diagnosed
SAMPLE_26086	SINGLE_5146	SINGLE	agilentV5	HiSeq4000	150	diagnosed
SAMPLE_26094	SINGLE_5154	SINGLE	agilentV5	HiSeq4000	150	diagnosed
SAMPLE_26095	SINGLE_5155	SINGLE	agilentV5	HiSeq4000	150	diagnosed
SAMPLE_26097	SINGLE_5157	SINGLE	agilentV5	HiSeq4000	150	diagnosed
SAMPLE_26098	SINGLE_5158	SINGLE	agilentV5	HiSeq4000	150	diagnosed
SAMPLE_26101	SINGLE_5161	SINGLE	agilentV5	HiSeq4000	150	diagnosed
SAMPLE_26102	SINGLE_5162	SINGLE	agilentV5	HiSeq4000	150	diagnosed
SAMPLE_26103	SINGLE_5163	SINGLE	agilentV5	HiSeq4000	150	diagnosed
SAMPLE_26107	SINGLE_5167	SINGLE	agilentV5	HiSeq4000	150	diagnosed
SAMPLE_26108	SINGLE_5168	SINGLE	agilentV5	HiSeq4000	150	diagnosed
SAMPLE_26113	SINGLE_5173	SINGLE	agilentV5	HiSeq4000	150	diagnosed
SAMPLE_26114	SINGLE_5174	SINGLE	agilentV5	HiSeq4000	150	diagnosed
SAMPLE_26116	SINGLE_5176	SINGLE	agilentV5	HiSeq4000	150	diagnosed
SAMPLE_26118	SINGLE_5178	SINGLE	agilentV5	HiSeq4000	150	diagnosed
SAMPLE_26124	SINGLE_5184	SINGLE	agilentV5	HiSeq4000	150	diagnosed
SAMPLE_26125	SINGLE_5185	SINGLE	agilentV5	HiSeq4000	150	diagnosed
SAMPLE_26135	SINGLE_5195	SINGLE	agilentV5	HiSeq4000	150	diagnosed
SAMPLE_26136	SINGLE_5196	SINGLE	agilentV5	HiSeq4000	150	diagnosed
SAMPLE_26139	SINGLE_5199	SINGLE	agilentV5	HiSeq4000	150	diagnosed
SAMPLE_2614	TRIO_872	CHILD	agilentV4	HiSeq2000	100	diagnosed
SAMPLE_26140	SINGLE_5200	SINGLE	agilentV5	HiSeq4000	150	diagnosed
SAMPLE_26149	SINGLE_5209	SINGLE	agilentV5	HiSeq4000	150	diagnosed
SAMPLE_26153	SINGLE_5213	SINGLE	agilentV5	HiSeq4000	150	diagnosed
SAMPLE_26158	SINGLE_5218	SINGLE	agilentV5	HiSeq4000	150	diagnosed
SAMPLE_26162	SINGLE_5222	SINGLE	agilentV5	HiSeq4000	150	diagnosed
SAMPLE_26166	SINGLE_5226	SINGLE	agilentV5	HiSeq4000	150	diagnosed
SAMPLE_26171	SINGLE_5231	SINGLE	agilentV5	HiSeq4000	150	diagnosed
SAMPLE_26174	SINGLE_5234	SINGLE	agilentV5	HiSeq4000	150	diagnosed
SAMPLE_26175	SINGLE_5235	SINGLE	agilentV5	HiSeq4000	150	diagnosed
SAMPLE_26177	SINGLE_5237	SINGLE	agilentV5	HiSeq4000	150	diagnosed
SAMPLE_26180	SINGLE_5240	SINGLE	agilentV5	HiSeq4000	150	diagnosed
SAMPLE_26188	SINGLE_5248	SINGLE	agilentV5	HiSeq4000	150	diagnosed
SAMPLE_26191	SINGLE_5251	SINGLE	agilentV5	HiSeq4000	150	diagnosed
SAMPLE_26193	SINGLE_5253	SINGLE	agilentV5	HiSeq4000	150	diagnosed
SAMPLE_26194	SINGLE_5254	SINGLE	agilentV5	HiSeq4000	150	diagnosed
SAMPLE_26197	SINGLE_5257	SINGLE	agilentV5	HiSeq4000	150	diagnosed
SAMPLE_2620	TRIO_874	CHILD	agilentV4	HiSeq2000	100	diagnosed
SAMPLE_26200	SINGLE_5260	SINGLE	agilentV5	HiSeq4000	150	diagnosed
SAMPLE_26202	SINGLE_5262	SINGLE	agilentV5	HiSeq4000	150	diagnosed
SAMPLE_26205	SINGLE_5265	SINGLE	agilentV5	HiSeq4000	150	diagnosed
SAMPLE_26208	SINGLE_5268	SINGLE	agilentV5	HiSeq4000	150	diagnosed
SAMPLE_26212	SINGLE_5272	SINGLE	agilentV5	HiSeq4000	150	diagnosed
SAMPLE_26222	SINGLE_5282	SINGLE	agilentV5	HiSeq4000	150	diagnosed
SAMPLE_26228	SINGLE_5288	SINGLE	agilentV5	HiSeq4000	150	diagnosed
SAMPLE_26230	SINGLE_5290	SINGLE	agilentV5	HiSeq4000	150	diagnosed
SAMPLE_26233	SINGLE_5293	SINGLE	agilentV5	HiSeq4000	150	diagnosed
SAMPLE_26234	SINGLE_5294	SINGLE	agilentV5	HiSeq4000	150	diagnosed
SAMPLE_26236	SINGLE_5296	SINGLE	agilentV5	HiSeq4000	150	diagnosed
SAMPLE_26239	SINGLE_5299	SINGLE	agilentV5	HiSeq4000	150	diagnosed
SAMPLE_26252	SINGLE_5312	SINGLE	agilentV5	HiSeq4000	150	diagnosed
SAMPLE_26255	SINGLE_5315	SINGLE	agilentV5	HiSeq4000	150	diagnosed
SAMPLE_2626	TRIO_876	CHILD	agilentV4	HiSeq2000	100	diagnosed
SAMPLE_26264	SINGLE_5324	SINGLE	agilentV5	HiSeq4000	150	diagnosed
SAMPLE_26269	SINGLE_5329	SINGLE	agilentV5	HiSeq4000	150	diagnosed
SAMPLE_26273	SINGLE_5333	SINGLE	agilentV5	HiSeq4000	150	diagnosed
SAMPLE_26274	SINGLE_5334	SINGLE	agilentV5	HiSeq4000	150	diagnosed
SAMPLE_26275	SINGLE_5335	SINGLE	agilentV5	HiSeq4000	150	diagnosed
SAMPLE_26284	SINGLE_5344	SINGLE	agilentV5	HiSeq4000	150	diagnosed
SAMPLE_26288	SINGLE_5348	SINGLE	agilentV5	HiSeq4000	150	diagnosed
SAMPLE_26295	SINGLE_5355	SINGLE	agilentV5	HiSeq4000	150	diagnosed
SAMPLE_26296	SINGLE_5356	SINGLE	agilentV5	HiSeq4000	150	diagnosed
SAMPLE_26297	SINGLE_5357	SINGLE	agilentV5	HiSeq4000	150	diagnosed
SAMPLE_26305	SINGLE_5365	SINGLE	agilentV5	HiSeq4000	150	diagnosed
SAMPLE_26313	SINGLE_5373	SINGLE	agilentV5	HiSeq4000	150	diagnosed
SAMPLE_26315	SINGLE_5375	SINGLE	agilentV5	HiSeq4000	150	diagnosed
SAMPLE_26317	SINGLE_5377	SINGLE	agilentV5	HiSeq4000	150	diagnosed
SAMPLE_26319	SINGLE_5379	SINGLE	agilentV5	HiSeq4000	150	diagnosed
SAMPLE_26320	SINGLE_5380	SINGLE	agilentV5	HiSeq4000	150	diagnosed
SAMPLE_26321	SINGLE_5381	SINGLE	agilentV5	HiSeq4000	150	diagnosed
SAMPLE_26324	SINGLE_5384	SINGLE	agilentV5	HiSeq4000	150	diagnosed
SAMPLE_26336	SINGLE_5396	SINGLE	agilentV5	HiSeq4000	150	diagnosed
SAMPLE_26342	SINGLE_5402	SINGLE	agilentV5	HiSeq4000	150	diagnosed
SAMPLE_26349	SINGLE_5409	SINGLE	agilentV5	HiSeq4000	150	diagnosed
SAMPLE_26358	SINGLE_5418	SINGLE	agilentV5	HiSeq4000	150	diagnosed
SAMPLE_26360	SINGLE_5420	SINGLE	agilentV5	HiSeq4000	150	diagnosed
SAMPLE_26367	SINGLE_5427	SINGLE	agilentV5	HiSeq4000	150	diagnosed
SAMPLE_26369	SINGLE_5429	SINGLE	agilentV5	HiSeq4000	150	diagnosed
SAMPLE_26373	SINGLE_5433	SINGLE	agilentV5	HiSeq4000	150	diagnosed
SAMPLE_26374	SINGLE_5434	SINGLE	agilentV5	HiSeq4000	150	diagnosed
SAMPLE_26380	SINGLE_5440	SINGLE	agilentV5	HiSeq4000	150	diagnosed
SAMPLE_26385	SINGLE_5445	SINGLE	agilentV5	HiSeq4000	150	diagnosed
SAMPLE_26388	SINGLE_5448	SINGLE	agilentV5	HiSeq4000	150	diagnosed
SAMPLE_26395	SINGLE_5455	SINGLE	agilentV5	HiSeq4000	150	diagnosed
SAMPLE_26396	SINGLE_5456	SINGLE	agilentV5	HiSeq4000	150	diagnosed
SAMPLE_26398	SINGLE_5458	SINGLE	agilentV5	HiSeq4000	150	diagnosed
SAMPLE_26401	SINGLE_5461	SINGLE	agilentV5	HiSeq4000	150	diagnosed
SAMPLE_26402	SINGLE_5462	SINGLE	agilentV5	HiSeq4000	150	diagnosed
SAMPLE_26407	SINGLE_5467	SINGLE	agilentV5	HiSeq4000	150	diagnosed
SAMPLE_2641	TRIO_881	CHILD	agilentV5	HiSeq2000	100	diagnosed
SAMPLE_26411	SINGLE_5471	SINGLE	agilentV5	HiSeq4000	150	diagnosed
SAMPLE_26413	SINGLE_5473	SINGLE	agilentV5	HiSeq4000	150	diagnosed
SAMPLE_26421	SINGLE_5481	SINGLE	agilentV5	HiSeq4000	150	diagnosed
SAMPLE_26423	SINGLE_5483	SINGLE	agilentV5	HiSeq4000	150	diagnosed
SAMPLE_26426	SINGLE_5486	SINGLE	agilentV5	HiSeq4000	150	diagnosed
SAMPLE_26429	SINGLE_5489	SINGLE	agilentV5	HiSeq4000	150	diagnosed
SAMPLE_26431	SINGLE_5491	SINGLE	agilentV5	HiSeq4000	150	diagnosed
SAMPLE_26441	SINGLE_5501	SINGLE	agilentV5	HiSeq4000	150	diagnosed
SAMPLE_26448	SINGLE_5508	SINGLE	agilentV5	HiSeq4000	150	diagnosed
SAMPLE_26450	SINGLE_5510	SINGLE	agilentV5	HiSeq4000	150	diagnosed
SAMPLE_26453	SINGLE_5513	SINGLE	agilentV5	HiSeq4000	150	diagnosed
SAMPLE_26459	SINGLE_5519	SINGLE	agilentV5	HiSeq4000	150	diagnosed
SAMPLE_26464	SINGLE_5524	SINGLE	agilentV5	HiSeq4000	150	diagnosed
SAMPLE_26465	SINGLE_5525	SINGLE	agilentV5	HiSeq4000	150	diagnosed
SAMPLE_26467	SINGLE_5527	SINGLE	agilentV5	HiSeq4000	150	diagnosed
SAMPLE_26471	SINGLE_5531	SINGLE	agilentV5	HiSeq4000	150	diagnosed
SAMPLE_26480	SINGLE_5540	SINGLE	agilentV5	HiSeq4000	150	diagnosed
SAMPLE_26484	SINGLE_5544	SINGLE	agilentV5	HiSeq4000	150	diagnosed
SAMPLE_26488	SINGLE_5548	SINGLE	agilentV5	HiSeq4000	150	diagnosed
SAMPLE_26493	SINGLE_5553	SINGLE	agilentV5	HiSeq4000	150	diagnosed
SAMPLE_26504	SINGLE_5564	SINGLE	agilentV5	HiSeq4000	150	diagnosed
SAMPLE_26512	SINGLE_5572	SINGLE	agilentV5	HiSeq4000	150	diagnosed
SAMPLE_26514	SINGLE_5574	SINGLE	agilentV5	HiSeq4000	150	diagnosed
SAMPLE_26526	SINGLE_5586	SINGLE	agilentV5	HiSeq4000	150	diagnosed
SAMPLE_26527	SINGLE_5587	SINGLE	agilentV5	HiSeq4000	150	diagnosed
SAMPLE_26529	SINGLE_5589	SINGLE	agilentV5	HiSeq4000	150	diagnosed
SAMPLE_26530	SINGLE_5590	SINGLE	agilentV5	HiSeq4000	150	diagnosed
SAMPLE_26531	SINGLE_5591	SINGLE	agilentV5	HiSeq4000	150	diagnosed
SAMPLE_26532	SINGLE_5592	SINGLE	agilentV5	HiSeq4000	150	diagnosed
SAMPLE_26534	SINGLE_5594	SINGLE	agilentV5	HiSeq4000	150	diagnosed
SAMPLE_26536	SINGLE_5596	SINGLE	agilentV5	HiSeq4000	150	diagnosed
SAMPLE_26545	SINGLE_5605	SINGLE	agilentV5	HiSeq4000	150	diagnosed
SAMPLE_26554	SINGLE_5614	SINGLE	agilentV5	HiSeq4000	150	diagnosed
SAMPLE_26567	SINGLE_5627	SINGLE	agilentV5	HiSeq4000	150	diagnosed
SAMPLE_26571	SINGLE_5631	SINGLE	agilentV5	HiSeq4000	150	diagnosed
SAMPLE_26587	SINGLE_5647	SINGLE	agilentV5	HiSeq4000	150	diagnosed
SAMPLE_26596	SINGLE_5656	SINGLE	agilentV5	HiSeq4000	150	diagnosed
SAMPLE_26599	SINGLE_5659	SINGLE	agilentV5	HiSeq4000	150	diagnosed
SAMPLE_26609	SINGLE_5669	SINGLE	agilentV5	HiSeq4000	150	diagnosed
SAMPLE_26610	SINGLE_5670	SINGLE	agilentV5	HiSeq4000	150	diagnosed
SAMPLE_26616	SINGLE_5676	SINGLE	agilentV5	HiSeq4000	150	diagnosed
SAMPLE_26633	SINGLE_5693	SINGLE	agilentV5	HiSeq4000	150	diagnosed
SAMPLE_26643	SINGLE_5703	SINGLE	agilentV5	HiSeq4000	150	diagnosed
SAMPLE_26646	SINGLE_5706	SINGLE	agilentV5	DNBSEQ	100	diagnosed
SAMPLE_26647	SINGLE_5707	SINGLE	agilentV5	HiSeq4000	150	diagnosed
SAMPLE_26655	SINGLE_5715	SINGLE	agilentV5	HiSeq4000	150	diagnosed
SAMPLE_26656	SINGLE_5716	SINGLE	agilentV5	HiSeq4000	150	diagnosed
SAMPLE_26658	SINGLE_5718	SINGLE	agilentV5	HiSeq4000	150	diagnosed
SAMPLE_26666	SINGLE_5726	SINGLE	agilentV5	HiSeq4000	150	diagnosed
SAMPLE_26675	SINGLE_5735	SINGLE	agilentV5	HiSeq4000	150	diagnosed
SAMPLE_26679	SINGLE_5739	SINGLE	agilentV5	HiSeq4000	150	diagnosed
SAMPLE_26681	SINGLE_5741	SINGLE	agilentV5	HiSeq4000	150	diagnosed
SAMPLE_26691	SINGLE_5751	SINGLE	agilentV5	HiSeq4000	150	diagnosed
SAMPLE_26697	SINGLE_5757	SINGLE	agilentV5	HiSeq4000	150	diagnosed
SAMPLE_26701	SINGLE_5761	SINGLE	agilentV5	HiSeq4000	150	diagnosed
SAMPLE_26706	SINGLE_5766	SINGLE	agilentV5	HiSeq4000	150	diagnosed
SAMPLE_2671	TRIO_891	CHILD	agilentV4	HiSeq2000	100	diagnosed
SAMPLE_26710	SINGLE_5770	SINGLE	agilentV5	HiSeq4000	150	diagnosed
SAMPLE_26712	SINGLE_5772	SINGLE	agilentV5	HiSeq4000	150	diagnosed
SAMPLE_26718	SINGLE_5778	SINGLE	agilentV5	HiSeq4000	150	diagnosed
SAMPLE_26735	SINGLE_5795	SINGLE	agilentV5	HiSeq4000	150	diagnosed
SAMPLE_26738	SINGLE_5798	SINGLE	agilentV5	HiSeq4000	150	diagnosed
SAMPLE_26742	SINGLE_5802	SINGLE	agilentV5	HiSeq4000	150	diagnosed
SAMPLE_26753	SINGLE_5813	SINGLE	agilentV5	HiSeq4000	150	diagnosed
SAMPLE_26766	SINGLE_5826	SINGLE	agilentV5	HiSeq4000	150	diagnosed
SAMPLE_26770	SINGLE_5830	SINGLE	agilentV5	HiSeq4000	150	diagnosed
SAMPLE_26771	SINGLE_5831	SINGLE	agilentV5	HiSeq4000	150	diagnosed
SAMPLE_26773	SINGLE_5833	SINGLE	agilentV5	HiSeq4000	150	diagnosed
SAMPLE_26796	SINGLE_5856	SINGLE	agilentV5	HiSeq4000	150	diagnosed
SAMPLE_26797	SINGLE_5857	SINGLE	agilentV5	HiSeq4000	150	diagnosed
SAMPLE_2680	TRIO_894	CHILD	agilentV4	HiSeq2000	100	diagnosed
SAMPLE_26805	SINGLE_5865	SINGLE	agilentV5	HiSeq4000	150	diagnosed
SAMPLE_26832	SINGLE_5892	SINGLE	agilentV5	HiSeq4000	150	diagnosed
SAMPLE_26839	SINGLE_5899	SINGLE	agilentV5	HiSeq4000	150	diagnosed
SAMPLE_26840	SINGLE_5900	SINGLE	agilentV5	HiSeq4000	150	diagnosed
SAMPLE_26843	SINGLE_5903	SINGLE	agilentV5	HiSeq4000	150	diagnosed
SAMPLE_26846	SINGLE_5906	SINGLE	agilentV5	HiSeq4000	150	diagnosed
SAMPLE_26853	SINGLE_5913	SINGLE	agilentV5	HiSeq4000	150	diagnosed
SAMPLE_26854	SINGLE_5914	SINGLE	agilentV5	HiSeq4000	150	diagnosed
SAMPLE_2686	TRIO_896	CHILD	agilentV4	HiSeq2000	100	diagnosed
SAMPLE_26864	SINGLE_5924	SINGLE	agilentV5	HiSeq4000	150	diagnosed
SAMPLE_26868	SINGLE_5928	SINGLE	agilentV5	HiSeq4000	150	diagnosed
SAMPLE_26873	SINGLE_5933	SINGLE	agilentV5	HiSeq4000	150	diagnosed
SAMPLE_26881	SINGLE_5941	SINGLE	agilentV5	HiSeq4000	150	diagnosed
SAMPLE_26889	SINGLE_5949	SINGLE	agilentV5	HiSeq4000	150	diagnosed
SAMPLE_26898	SINGLE_5958	SINGLE	agilentV5	HiSeq4000	150	diagnosed
SAMPLE_26910	SINGLE_5970	SINGLE	agilentV5	HiSeq4000	150	diagnosed
SAMPLE_26913	SINGLE_5973	SINGLE	agilentV5	HiSeq4000	150	diagnosed
SAMPLE_26915	SINGLE_5975	SINGLE	agilentV5	HiSeq4000	150	diagnosed
SAMPLE_26920	SINGLE_5980	SINGLE	agilentV5	HiSeq4000	150	diagnosed
SAMPLE_26927	SINGLE_5987	SINGLE	agilentV5	HiSeq4000	150	diagnosed
SAMPLE_26937	SINGLE_5997	SINGLE	agilentV5	HiSeq4000	150	diagnosed
SAMPLE_26938	SINGLE_5998	SINGLE	agilentV5	HiSeq4000	150	diagnosed
SAMPLE_26940	SINGLE_6000	SINGLE	agilentV5	HiSeq4000	150	diagnosed
SAMPLE_26946	SINGLE_6006	SINGLE	agilentV5	HiSeq4000	150	diagnosed
SAMPLE_26949	SINGLE_6009	SINGLE	agilentV5	HiSeq4000	150	diagnosed
SAMPLE_26955	SINGLE_6015	SINGLE	agilentV5	HiSeq4000	150	diagnosed
SAMPLE_26957	SINGLE_6017	SINGLE	agilentV5	HiSeq4000	150	diagnosed
SAMPLE_26962	SINGLE_6022	SINGLE	agilentV5	HiSeq4000	150	diagnosed
SAMPLE_26973	SINGLE_6033	SINGLE	agilentV5	HiSeq4000	150	diagnosed
SAMPLE_26978	SINGLE_6038	SINGLE	agilentV5	HiSeq4000	150	diagnosed
SAMPLE_26981	SINGLE_6041	SINGLE	agilentV5	HiSeq4000	150	diagnosed
SAMPLE_26983	SINGLE_6043	SINGLE	agilentV5	HiSeq4000	150	diagnosed
SAMPLE_26988	SINGLE_6048	SINGLE	agilentV5	HiSeq4000	150	diagnosed
SAMPLE_26992	SINGLE_6052	SINGLE	agilentV5	HiSeq4000	150	diagnosed
SAMPLE_26994	SINGLE_6054	SINGLE	agilentV5	HiSeq4000	150	diagnosed
SAMPLE_27009	SINGLE_6069	SINGLE	agilentV5	HiSeq4000	150	diagnosed
SAMPLE_27016	SINGLE_6076	SINGLE	agilentV5	HiSeq4000	150	diagnosed
SAMPLE_27019	SINGLE_6079	SINGLE	agilentV5	HiSeq4000	150	diagnosed
SAMPLE_27020	SINGLE_6080	SINGLE	agilentV5	HiSeq4000	150	diagnosed
SAMPLE_27021	SINGLE_6081	SINGLE	agilentV5	HiSeq4000	150	diagnosed
SAMPLE_27022	SINGLE_6082	SINGLE	agilentV5	HiSeq4000	150	diagnosed
SAMPLE_27025	SINGLE_6085	SINGLE	agilentV5	HiSeq4000	150	diagnosed
SAMPLE_27028	SINGLE_6088	SINGLE	agilentV5	HiSeq4000	150	diagnosed
SAMPLE_27029	SINGLE_6089	SINGLE	agilentV5	HiSeq4000	150	diagnosed
SAMPLE_27031	SINGLE_6091	SINGLE	agilentV5	HiSeq4000	150	diagnosed
SAMPLE_27035	SINGLE_6095	SINGLE	agilentV5	HiSeq4000	150	diagnosed
SAMPLE_27040	SINGLE_6100	SINGLE	agilentV5	HiSeq4000	150	diagnosed
SAMPLE_27042	SINGLE_6102	SINGLE	agilentV5	HiSeq4000	150	diagnosed
SAMPLE_27043	SINGLE_6103	SINGLE	agilentV5	HiSeq4000	150	diagnosed
SAMPLE_27045	SINGLE_6105	SINGLE	agilentV5	HiSeq4000	150	diagnosed
SAMPLE_27047	SINGLE_6107	SINGLE	agilentV5	HiSeq4000	150	diagnosed
SAMPLE_27048	SINGLE_6108	SINGLE	agilentV5	HiSeq4000	150	diagnosed
SAMPLE_27049	SINGLE_6109	SINGLE	agilentV5	HiSeq4000	150	diagnosed
SAMPLE_27058	SINGLE_6118	SINGLE	agilentV5	HiSeq4000	150	diagnosed
SAMPLE_27060	SINGLE_6120	SINGLE	agilentV5	HiSeq4000	150	diagnosed
SAMPLE_27061	SINGLE_6121	SINGLE	agilentV5	HiSeq4000	150	diagnosed
SAMPLE_27063	SINGLE_6123	SINGLE	agilentV5	HiSeq4000	150	diagnosed
SAMPLE_27070	SINGLE_6130	SINGLE	agilentV5	HiSeq4000	150	diagnosed
SAMPLE_27071	SINGLE_6131	SINGLE	agilentV5	HiSeq4000	150	diagnosed
SAMPLE_27075	SINGLE_6135	SINGLE	agilentV5	HiSeq4000	150	diagnosed
SAMPLE_27079	SINGLE_6139	SINGLE	agilentV5	HiSeq4000	150	diagnosed
SAMPLE_27080	SINGLE_6140	SINGLE	agilentV5	HiSeq4000	150	diagnosed
SAMPLE_27090	SINGLE_6150	SINGLE	agilentV5	HiSeq4000	150	diagnosed
SAMPLE_27092	SINGLE_6152	SINGLE	agilentV5	HiSeq4000	150	diagnosed
SAMPLE_27093	SINGLE_6153	SINGLE	agilentV5	HiSeq4000	150	diagnosed
SAMPLE_27094	SINGLE_6154	SINGLE	agilentV5	HiSeq4000	150	diagnosed
SAMPLE_27097	SINGLE_6157	SINGLE	agilentV5	HiSeq4000	150	diagnosed
SAMPLE_27098	SINGLE_6158	SINGLE	agilentV5	HiSeq4000	150	diagnosed
SAMPLE_2710	TRIO_904	CHILD	agilentV5	HiSeq4000	150	diagnosed
SAMPLE_27101	SINGLE_6161	SINGLE	agilentV5	HiSeq4000	150	diagnosed
SAMPLE_27103	SINGLE_6163	SINGLE	agilentV5	HiSeq4000	150	diagnosed
SAMPLE_27104	SINGLE_6164	SINGLE	agilentV5	HiSeq4000	150	diagnosed
SAMPLE_27110	SINGLE_6170	SINGLE	agilentV5	HiSeq4000	150	diagnosed
SAMPLE_27111	SINGLE_6171	SINGLE	agilentV5	HiSeq4000	150	diagnosed
SAMPLE_27115	SINGLE_6175	SINGLE	agilentV5	HiSeq4000	150	diagnosed
SAMPLE_27118	SINGLE_6178	SINGLE	agilentV5	HiSeq4000	150	diagnosed
SAMPLE_27124	SINGLE_6184	SINGLE	agilentV5	HiSeq4000	150	diagnosed
SAMPLE_27130	SINGLE_6190	SINGLE	agilentV5	HiSeq4000	150	diagnosed
SAMPLE_27134	SINGLE_6194	SINGLE	agilentV5	HiSeq4000	150	diagnosed
SAMPLE_27137	SINGLE_6197	SINGLE	agilentV5	HiSeq4000	150	diagnosed
SAMPLE_27138	SINGLE_6198	SINGLE	agilentV5	HiSeq4000	150	diagnosed
SAMPLE_27146	SINGLE_6206	SINGLE	agilentV5	HiSeq4000	150	diagnosed
SAMPLE_27151	SINGLE_6211	SINGLE	agilentV5	HiSeq4000	150	diagnosed
SAMPLE_27152	SINGLE_6212	SINGLE	agilentV5	HiSeq4000	150	diagnosed
SAMPLE_27154	SINGLE_6214	SINGLE	agilentV5	HiSeq4000	150	diagnosed
SAMPLE_27159	SINGLE_6219	SINGLE	agilentV5	HiSeq4000	150	diagnosed
SAMPLE_27160	SINGLE_6220	SINGLE	agilentV5	HiSeq4000	150	diagnosed
SAMPLE_27161	SINGLE_6221	SINGLE	agilentV5	HiSeq4000	150	diagnosed
SAMPLE_27173	SINGLE_6233	SINGLE	agilentV5	HiSeq4000	150	diagnosed
SAMPLE_27175	SINGLE_6235	SINGLE	agilentV5	HiSeq4000	150	diagnosed
SAMPLE_27187	SINGLE_6247	SINGLE	agilentV5	HiSeq4000	150	diagnosed
SAMPLE_27199	SINGLE_6259	SINGLE	agilentV5	HiSeq4000	150	diagnosed
SAMPLE_27200	SINGLE_6260	SINGLE	agilentV5	HiSeq4000	150	diagnosed
SAMPLE_27202	SINGLE_6262	SINGLE	agilentV5	HiSeq4000	150	diagnosed
SAMPLE_27206	SINGLE_6266	SINGLE	agilentV5	HiSeq4000	150	diagnosed
SAMPLE_27211	SINGLE_6271	SINGLE	agilentV5	HiSeq4000	150	diagnosed
SAMPLE_27213	SINGLE_6273	SINGLE	agilentV5	HiSeq4000	150	diagnosed
SAMPLE_27218	SINGLE_6278	SINGLE	agilentV5	HiSeq4000	150	diagnosed
SAMPLE_27231	SINGLE_6291	SINGLE	agilentV5	HiSeq4000	150	diagnosed
SAMPLE_27239	SINGLE_6299	SINGLE	agilentV5	HiSeq4000	150	diagnosed
SAMPLE_27242	SINGLE_6302	SINGLE	agilentV5	HiSeq4000	150	diagnosed
SAMPLE_27245	SINGLE_6305	SINGLE	agilentV5	HiSeq4000	150	diagnosed
SAMPLE_27249	SINGLE_6309	SINGLE	agilentV5	HiSeq4000	150	diagnosed
SAMPLE_27251	SINGLE_6311	SINGLE	agilentV5	HiSeq4000	150	diagnosed
SAMPLE_27253	SINGLE_6313	SINGLE	agilentV5	HiSeq4000	150	diagnosed
SAMPLE_27259	SINGLE_6319	SINGLE	agilentV5	HiSeq4000	150	diagnosed
SAMPLE_27260	SINGLE_6320	SINGLE	agilentV5	HiSeq4000	150	diagnosed
SAMPLE_27265	SINGLE_6325	SINGLE	agilentV5	HiSeq4000	150	diagnosed
SAMPLE_27271	SINGLE_6331	SINGLE	agilentV5	HiSeq4000	150	diagnosed
SAMPLE_27272	SINGLE_6332	SINGLE	agilentV5	HiSeq4000	150	diagnosed
SAMPLE_27279	SINGLE_6339	SINGLE	agilentV5	HiSeq4000	150	diagnosed
SAMPLE_27280	SINGLE_6340	SINGLE	agilentV5	HiSeq4000	150	diagnosed
SAMPLE_27281	SINGLE_6341	SINGLE	agilentV5	HiSeq4000	150	diagnosed
SAMPLE_27286	SINGLE_6346	SINGLE	agilentV5	HiSeq4000	150	diagnosed
SAMPLE_27292	SINGLE_6352	SINGLE	agilentV5	HiSeq4000	150	diagnosed
SAMPLE_27301	SINGLE_6361	SINGLE	agilentV5	HiSeq4000	150	diagnosed
SAMPLE_27305	SINGLE_6365	SINGLE	agilentV5	HiSeq4000	150	diagnosed
SAMPLE_27312	SINGLE_6372	SINGLE	agilentV5	HiSeq4000	150	diagnosed
SAMPLE_27313	SINGLE_6373	SINGLE	agilentV5	HiSeq4000	150	diagnosed
SAMPLE_27319	SINGLE_6379	SINGLE	agilentV5	HiSeq4000	150	diagnosed
SAMPLE_27320	SINGLE_6380	SINGLE	agilentV5	HiSeq4000	150	diagnosed
SAMPLE_27322	SINGLE_6382	SINGLE	agilentV5	HiSeq4000	150	diagnosed
SAMPLE_27325	SINGLE_6385	SINGLE	agilentV5	HiSeq4000	150	diagnosed
SAMPLE_27327	SINGLE_6387	SINGLE	agilentV5	HiSeq4000	150	diagnosed
SAMPLE_27328	SINGLE_6388	SINGLE	agilentV5	HiSeq4000	150	diagnosed
SAMPLE_27329	SINGLE_6389	SINGLE	agilentV5	HiSeq4000	150	diagnosed
SAMPLE_27336	SINGLE_6396	SINGLE	agilentV5	HiSeq4000	150	diagnosed
SAMPLE_27337	SINGLE_6397	SINGLE	agilentV5	HiSeq4000	150	diagnosed
SAMPLE_27339	SINGLE_6399	SINGLE	agilentV5	HiSeq4000	150	diagnosed
SAMPLE_27343	SINGLE_6403	SINGLE	agilentV5	HiSeq4000	150	diagnosed
SAMPLE_27344	SINGLE_6404	SINGLE	agilentV5	HiSeq4000	150	diagnosed
SAMPLE_27346	SINGLE_6406	SINGLE	agilentV5	HiSeq4000	150	diagnosed
SAMPLE_27364	SINGLE_6424	SINGLE	agilentV5	HiSeq4000	150	diagnosed
SAMPLE_27369	SINGLE_6429	SINGLE	agilentV5	HiSeq4000	150	diagnosed
SAMPLE_27373	SINGLE_6433	SINGLE	agilentV5	HiSeq4000	150	diagnosed
SAMPLE_27380	SINGLE_6440	SINGLE	agilentV5	HiSeq4000	150	diagnosed
SAMPLE_27385	SINGLE_6445	SINGLE	agilentV5	HiSeq4000	150	diagnosed
SAMPLE_27390	SINGLE_6450	SINGLE	agilentV5	HiSeq4000	150	diagnosed
SAMPLE_27391	SINGLE_6451	SINGLE	agilentV5	HiSeq4000	150	diagnosed
SAMPLE_27392	SINGLE_6452	SINGLE	agilentV5	HiSeq4000	150	diagnosed
SAMPLE_27393	SINGLE_6453	SINGLE	agilentV5	HiSeq4000	150	diagnosed
SAMPLE_27394	SINGLE_6454	SINGLE	agilentV5	HiSeq4000	150	diagnosed
SAMPLE_27395	SINGLE_6455	SINGLE	agilentV5	HiSeq4000	150	diagnosed
SAMPLE_27397	SINGLE_6457	SINGLE	agilentV5	HiSeq4000	150	diagnosed
SAMPLE_27398	SINGLE_6458	SINGLE	agilentV5	HiSeq4000	150	diagnosed
SAMPLE_2740	TRIO_914	CHILD	agilentV4	HiSeq2000	100	diagnosed
SAMPLE_27402	SINGLE_6462	SINGLE	agilentV5	HiSeq4000	150	diagnosed
SAMPLE_27403	SINGLE_6463	SINGLE	agilentV5	HiSeq4000	150	diagnosed
SAMPLE_27411	SINGLE_6471	SINGLE	agilentV5	HiSeq4000	150	diagnosed
SAMPLE_27413	SINGLE_6473	SINGLE	agilentV5	HiSeq4000	150	diagnosed
SAMPLE_27414	SINGLE_6474	SINGLE	agilentV5	HiSeq4000	150	diagnosed
SAMPLE_27421	SINGLE_6481	SINGLE	agilentV5	HiSeq4000	150	diagnosed
SAMPLE_27425	SINGLE_6485	SINGLE	agilentV5	HiSeq4000	150	diagnosed
SAMPLE_27428	SINGLE_6488	SINGLE	agilentV5	HiSeq4000	150	diagnosed
SAMPLE_27432	SINGLE_6492	SINGLE	agilentV5	HiSeq4000	150	diagnosed
SAMPLE_27442	SINGLE_6502	SINGLE	agilentV5	HiSeq4000	150	diagnosed
SAMPLE_27443	SINGLE_6503	SINGLE	agilentV5	HiSeq4000	150	diagnosed
SAMPLE_27448	SINGLE_6508	SINGLE	agilentV5	HiSeq4000	150	diagnosed
SAMPLE_27449	SINGLE_6509	SINGLE	agilentV5	HiSeq4000	150	diagnosed
SAMPLE_27450	SINGLE_6510	SINGLE	agilentV5	HiSeq4000	150	diagnosed
SAMPLE_27451	SINGLE_6511	SINGLE	agilentV5	HiSeq4000	150	diagnosed
SAMPLE_27454	SINGLE_6514	SINGLE	agilentV5	HiSeq4000	150	diagnosed
SAMPLE_27475	SINGLE_6535	SINGLE	agilentV5	HiSeq4000	150	diagnosed
SAMPLE_27481	SINGLE_6541	SINGLE	agilentV5	HiSeq4000	150	diagnosed
SAMPLE_27485	SINGLE_6545	SINGLE	agilentV5	HiSeq4000	150	diagnosed
SAMPLE_27486	SINGLE_6546	SINGLE	agilentV5	HiSeq4000	150	diagnosed
SAMPLE_27488	SINGLE_6548	SINGLE	agilentV5	HiSeq4000	150	diagnosed
SAMPLE_2749	TRIO_917	CHILD	agilentV4	HiSeq2000	100	diagnosed
SAMPLE_27494	SINGLE_6554	SINGLE	agilentV5	HiSeq4000	150	diagnosed
SAMPLE_27504	SINGLE_6564	SINGLE	agilentV5	HiSeq4000	150	diagnosed
SAMPLE_27505	SINGLE_6565	SINGLE	agilentV5	HiSeq4000	150	diagnosed
SAMPLE_27508	SINGLE_6568	SINGLE	agilentV5	HiSeq4000	150	diagnosed
SAMPLE_27513	SINGLE_6573	SINGLE	agilentV5	HiSeq4000	150	diagnosed
SAMPLE_27515	SINGLE_6575	SINGLE	agilentV5	HiSeq4000	150	diagnosed
SAMPLE_27517	SINGLE_6577	SINGLE	agilentV5	HiSeq4000	150	diagnosed
SAMPLE_27518	SINGLE_6578	SINGLE	agilentV5	HiSeq4000	150	diagnosed
SAMPLE_27522	SINGLE_6582	SINGLE	agilentV5	HiSeq4000	150	diagnosed
SAMPLE_27525	SINGLE_6585	SINGLE	agilentV5	HiSeq4000	150	diagnosed
SAMPLE_27531	SINGLE_6591	SINGLE	agilentV5	HiSeq4000	150	diagnosed
SAMPLE_27538	SINGLE_6598	SINGLE	agilentV5	HiSeq4000	150	diagnosed
SAMPLE_27539	SINGLE_6599	SINGLE	agilentV5	HiSeq4000	150	diagnosed
SAMPLE_27548	SINGLE_6608	SINGLE	agilentV5	HiSeq4000	150	diagnosed
SAMPLE_27550	SINGLE_6610	SINGLE	agilentV5	HiSeq4000	150	diagnosed
SAMPLE_27551	SINGLE_6611	SINGLE	agilentV5	HiSeq4000	150	diagnosed
SAMPLE_27561	SINGLE_6621	SINGLE	agilentV5	HiSeq4000	150	diagnosed
SAMPLE_27571	SINGLE_6631	SINGLE	agilentV5	HiSeq4000	150	diagnosed
SAMPLE_27575	SINGLE_6635	SINGLE	agilentV5	HiSeq4000	150	diagnosed
SAMPLE_27578	SINGLE_6638	SINGLE	agilentV5	HiSeq4000	150	diagnosed
SAMPLE_27579	SINGLE_6639	SINGLE	agilentV5	HiSeq4000	150	diagnosed
SAMPLE_2758	TRIO_920	CHILD	agilentV4	HiSeq2000	100	diagnosed
SAMPLE_27580	SINGLE_6640	SINGLE	agilentV5	HiSeq4000	150	diagnosed
SAMPLE_27582	SINGLE_6642	SINGLE	agilentV5	HiSeq4000	150	diagnosed
SAMPLE_27587	SINGLE_6647	SINGLE	agilentV5	HiSeq4000	150	diagnosed
SAMPLE_27588	SINGLE_6648	SINGLE	agilentV5	HiSeq4000	150	diagnosed
SAMPLE_27592	SINGLE_6652	SINGLE	agilentV5	HiSeq4000	150	diagnosed
SAMPLE_27593	SINGLE_6653	SINGLE	agilentV5	HiSeq4000	150	diagnosed
SAMPLE_27594	SINGLE_6654	SINGLE	agilentV5	HiSeq4000	150	diagnosed
SAMPLE_27600	SINGLE_6660	SINGLE	agilentV5	HiSeq4000	150	diagnosed
SAMPLE_27616	SINGLE_6676	SINGLE	agilentV5	HiSeq4000	150	diagnosed
SAMPLE_27618	SINGLE_6678	SINGLE	agilentV5	HiSeq4000	150	diagnosed
SAMPLE_27619	SINGLE_6679	SINGLE	agilentV5	HiSeq4000	150	diagnosed
SAMPLE_27635	SINGLE_6695	SINGLE	agilentV5	HiSeq4000	150	diagnosed
SAMPLE_27660	SINGLE_6720	SINGLE	agilentV5	HiSeq4000	150	diagnosed
SAMPLE_27679	SINGLE_6739	SINGLE	agilentV5	HiSeq4000	150	diagnosed
SAMPLE_27684	SINGLE_6744	SINGLE	agilentV5	HiSeq4000	150	diagnosed
SAMPLE_27685	SINGLE_6745	SINGLE	agilentV5	HiSeq4000	150	diagnosed
SAMPLE_27687	SINGLE_6747	SINGLE	agilentV5	HiSeq4000	150	diagnosed
SAMPLE_27688	SINGLE_6748	SINGLE	agilentV5	HiSeq4000	150	diagnosed
SAMPLE_27694	SINGLE_6754	SINGLE	agilentV5	HiSeq4000	150	diagnosed
SAMPLE_27695	SINGLE_6755	SINGLE	agilentV5	HiSeq4000	150	diagnosed
SAMPLE_27702	SINGLE_6762	SINGLE	agilentV5	HiSeq4000	150	diagnosed
SAMPLE_27706	SINGLE_6766	SINGLE	agilentV5	HiSeq4000	150	diagnosed
SAMPLE_27714	SINGLE_6774	SINGLE	agilentV5	HiSeq4000	150	diagnosed
SAMPLE_27723	SINGLE_6783	SINGLE	agilentV5	HiSeq4000	150	diagnosed
SAMPLE_27726	SINGLE_6786	SINGLE	agilentV5	HiSeq4000	150	diagnosed
SAMPLE_27732	SINGLE_6792	SINGLE	agilentV5	HiSeq4000	150	diagnosed
SAMPLE_27736	SINGLE_6796	SINGLE	agilentV5	HiSeq4000	150	diagnosed
SAMPLE_27739	SINGLE_6799	SINGLE	agilentV5	HiSeq4000	150	diagnosed
SAMPLE_27741	SINGLE_6801	SINGLE	agilentV5	HiSeq4000	150	diagnosed
SAMPLE_27750	SINGLE_6810	SINGLE	agilentV5	HiSeq4000	150	diagnosed
SAMPLE_27767	SINGLE_6827	SINGLE	agilentV5	HiSeq4000	150	diagnosed
SAMPLE_27773	SINGLE_6833	SINGLE	agilentV5	HiSeq4000	150	diagnosed
SAMPLE_27778	SINGLE_6838	SINGLE	agilentV5	HiSeq4000	150	diagnosed
SAMPLE_27781	SINGLE_6841	SINGLE	agilentV5	HiSeq4000	150	diagnosed
SAMPLE_27783	SINGLE_6843	SINGLE	agilentV5	HiSeq4000	150	diagnosed
SAMPLE_27788	SINGLE_6848	SINGLE	agilentV5	HiSeq4000	150	diagnosed
SAMPLE_27789	SINGLE_6849	SINGLE	agilentV5	HiSeq4000	150	diagnosed
SAMPLE_27790	SINGLE_6850	SINGLE	agilentV5	HiSeq4000	150	diagnosed
SAMPLE_27791	SINGLE_6851	SINGLE	agilentV5	HiSeq4000	150	diagnosed
SAMPLE_27792	SINGLE_6852	SINGLE	agilentV5	HiSeq4000	150	diagnosed
SAMPLE_27793	SINGLE_6853	SINGLE	agilentV5	HiSeq4000	150	diagnosed
SAMPLE_27797	SINGLE_6857	SINGLE	agilentV5	HiSeq4000	150	diagnosed
SAMPLE_27804	SINGLE_6864	SINGLE	agilentV5	HiSeq4000	150	diagnosed
SAMPLE_27806	SINGLE_6866	SINGLE	agilentV5	HiSeq4000	150	diagnosed
SAMPLE_2782	TRIO_928	CHILD	agilentV4	HiSeq2000	100	diagnosed
SAMPLE_27823	SINGLE_6883	SINGLE	agilentV5	HiSeq4000	150	diagnosed
SAMPLE_27833	SINGLE_6893	SINGLE	agilentV5	HiSeq4000	150	diagnosed
SAMPLE_27837	SINGLE_6897	SINGLE	agilentV5	HiSeq4000	150	diagnosed
SAMPLE_27838	SINGLE_6898	SINGLE	agilentV5	HiSeq4000	150	diagnosed
SAMPLE_27839	SINGLE_6899	SINGLE	agilentV5	HiSeq4000	150	diagnosed
SAMPLE_27845	SINGLE_6905	SINGLE	agilentV5	HiSeq4000	150	diagnosed
SAMPLE_27859	SINGLE_6919	SINGLE	agilentV5	HiSeq4000	150	diagnosed
SAMPLE_27861	SINGLE_6921	SINGLE	agilentV5	HiSeq4000	150	diagnosed
SAMPLE_27868	SINGLE_6928	SINGLE	agilentV5	HiSeq4000	150	diagnosed
SAMPLE_27878	SINGLE_6938	SINGLE	agilentV5	HiSeq4000	150	diagnosed
SAMPLE_27884	SINGLE_6944	SINGLE	agilentV5	HiSeq4000	150	diagnosed
SAMPLE_27885	SINGLE_6945	SINGLE	agilentV5	HiSeq4000	150	diagnosed
SAMPLE_27888	SINGLE_6948	SINGLE	agilentV5	HiSeq4000	150	diagnosed
SAMPLE_27893	SINGLE_6953	SINGLE	agilentV5	HiSeq4000	150	diagnosed
SAMPLE_27906	SINGLE_6966	SINGLE	agilentV5	HiSeq4000	150	diagnosed
SAMPLE_27907	SINGLE_6967	SINGLE	agilentV5	HiSeq4000	150	diagnosed
SAMPLE_27918	SINGLE_6978	SINGLE	agilentV5	HiSeq4000	150	diagnosed
SAMPLE_27920	SINGLE_6980	SINGLE	agilentV5	HiSeq4000	150	diagnosed
SAMPLE_27924	SINGLE_6984	SINGLE	agilentV5	HiSeq4000	150	diagnosed
SAMPLE_27925	SINGLE_6985	SINGLE	agilentV5	HiSeq4000	150	diagnosed
SAMPLE_27928	SINGLE_6988	SINGLE	agilentV5	HiSeq4000	150	diagnosed
SAMPLE_27930	SINGLE_6990	SINGLE	agilentV5	HiSeq4000	150	diagnosed
SAMPLE_27931	SINGLE_6991	SINGLE	agilentV5	HiSeq4000	150	diagnosed
SAMPLE_27936	SINGLE_6996	SINGLE	agilentV5	HiSeq4000	150	diagnosed
SAMPLE_27938	SINGLE_6998	SINGLE	agilentV5	HiSeq4000	150	diagnosed
SAMPLE_27940	SINGLE_7000	SINGLE	agilentV5	HiSeq4000	150	diagnosed
SAMPLE_27942	SINGLE_7002	SINGLE	agilentV5	HiSeq4000	150	diagnosed
SAMPLE_27966	SINGLE_7026	SINGLE	agilentV5	HiSeq4000	150	diagnosed
SAMPLE_27970	SINGLE_7030	SINGLE	agilentV5	HiSeq4000	150	diagnosed
SAMPLE_27990	SINGLE_7050	SINGLE	agilentV5	HiSeq4000	150	diagnosed
SAMPLE_27998	SINGLE_7058	SINGLE	agilentV5	HiSeq4000	150	diagnosed
SAMPLE_28	TRIO_10	CHILD	agilentV5	HiSeq4000	150	diagnosed
SAMPLE_28008	SINGLE_7068	SINGLE	agilentV5	HiSeq4000	150	diagnosed
SAMPLE_28009	SINGLE_7069	SINGLE	agilentV5	HiSeq4000	150	diagnosed
SAMPLE_28013	SINGLE_7073	SINGLE	agilentV5	HiSeq4000	150	diagnosed
SAMPLE_28015	SINGLE_7075	SINGLE	agilentV5	HiSeq4000	150	diagnosed
SAMPLE_28016	SINGLE_7076	SINGLE	agilentV5	HiSeq4000	150	diagnosed
SAMPLE_28026	SINGLE_7086	SINGLE	agilentV5	HiSeq4000	150	diagnosed
SAMPLE_28027	SINGLE_7087	SINGLE	agilentV5	HiSeq4000	150	diagnosed
SAMPLE_28028	SINGLE_7088	SINGLE	agilentV5	HiSeq4000	150	diagnosed
SAMPLE_2803	TRIO_935	CHILD	agilentV4	HiSeq2000	100	diagnosed
SAMPLE_28032	SINGLE_7092	SINGLE	agilentV5	HiSeq4000	150	diagnosed
SAMPLE_28034	SINGLE_7094	SINGLE	agilentV5	HiSeq4000	150	diagnosed
SAMPLE_28035	SINGLE_7095	SINGLE	agilentV5	HiSeq4000	150	diagnosed
SAMPLE_28036	SINGLE_7096	SINGLE	agilentV5	HiSeq4000	150	diagnosed
SAMPLE_28045	SINGLE_7105	SINGLE	agilentV5	HiSeq4000	150	diagnosed
SAMPLE_28047	SINGLE_7107	SINGLE	agilentV5	HiSeq4000	150	diagnosed
SAMPLE_28048	SINGLE_7108	SINGLE	agilentV5	HiSeq4000	150	diagnosed
SAMPLE_28049	SINGLE_7109	SINGLE	agilentV5	HiSeq4000	150	diagnosed
SAMPLE_28055	SINGLE_7115	SINGLE	agilentV5	HiSeq4000	150	diagnosed
SAMPLE_28058	SINGLE_7118	SINGLE	agilentV5	HiSeq4000	150	diagnosed
SAMPLE_28060	SINGLE_7120	SINGLE	agilentV5	HiSeq4000	150	diagnosed
SAMPLE_28067	SINGLE_7127	SINGLE	agilentV5	HiSeq4000	150	diagnosed
SAMPLE_28080	SINGLE_7140	SINGLE	agilentV5	HiSeq4000	150	diagnosed
SAMPLE_28084	SINGLE_7144	SINGLE	agilentV5	HiSeq4000	150	diagnosed
SAMPLE_28087	SINGLE_7147	SINGLE	agilentV5	HiSeq4000	150	diagnosed
SAMPLE_28090	SINGLE_7150	SINGLE	agilentV5	HiSeq4000	150	diagnosed
SAMPLE_28102	SINGLE_7162	SINGLE	agilentV5	HiSeq4000	150	diagnosed
SAMPLE_28105	SINGLE_7165	SINGLE	agilentV5	HiSeq4000	150	diagnosed
SAMPLE_2812	TRIO_938	CHILD	agilentV4	HiSeq2000	100	diagnosed
SAMPLE_28120	SINGLE_7180	SINGLE	agilentV5	HiSeq4000	150	diagnosed
SAMPLE_28123	SINGLE_7183	SINGLE	agilentV5	HiSeq4000	150	diagnosed
SAMPLE_28136	SINGLE_7196	SINGLE	agilentV5	HiSeq4000	150	diagnosed
SAMPLE_28141	SINGLE_7201	SINGLE	agilentV5	HiSeq4000	150	diagnosed
SAMPLE_28142	SINGLE_7202	SINGLE	agilentV5	HiSeq4000	150	diagnosed
SAMPLE_28143	SINGLE_7203	SINGLE	agilentV5	HiSeq4000	150	diagnosed
SAMPLE_28144	SINGLE_7204	SINGLE	agilentV5	HiSeq4000	150	diagnosed
SAMPLE_28145	SINGLE_7205	SINGLE	agilentV5	HiSeq4000	150	diagnosed
SAMPLE_28146	SINGLE_7206	SINGLE	agilentV5	HiSeq4000	150	diagnosed
SAMPLE_28148	SINGLE_7208	SINGLE	agilentV5	HiSeq4000	150	diagnosed
SAMPLE_28149	SINGLE_7209	SINGLE	agilentV5	HiSeq4000	150	diagnosed
SAMPLE_28152	SINGLE_7212	SINGLE	agilentV5	HiSeq4000	150	diagnosed
SAMPLE_28156	SINGLE_7216	SINGLE	agilentV5	HiSeq4000	150	diagnosed
SAMPLE_28159	SINGLE_7219	SINGLE	agilentV5	HiSeq4000	150	diagnosed
SAMPLE_28162	SINGLE_7222	SINGLE	agilentV5	HiSeq4000	150	diagnosed
SAMPLE_28163	SINGLE_7223	SINGLE	agilentV5	HiSeq4000	150	diagnosed
SAMPLE_28170	SINGLE_7230	SINGLE	agilentV5	HiSeq4000	150	diagnosed
SAMPLE_28188	SINGLE_7248	SINGLE	agilentV5	HiSeq4000	150	diagnosed
SAMPLE_28195	SINGLE_7255	SINGLE	agilentV5	HiSeq4000	150	diagnosed
SAMPLE_28205	SINGLE_7265	SINGLE	agilentV5	HiSeq4000	150	diagnosed
SAMPLE_28206	SINGLE_7266	SINGLE	agilentV5	HiSeq4000	150	diagnosed
SAMPLE_28210	SINGLE_7270	SINGLE	agilentV5	HiSeq4000	150	diagnosed
SAMPLE_28215	SINGLE_7275	SINGLE	agilentV5	HiSeq4000	150	diagnosed
SAMPLE_28220	SINGLE_7280	SINGLE	agilentV5	HiSeq4000	150	diagnosed
SAMPLE_28222	SINGLE_7282	SINGLE	agilentV5	HiSeq4000	150	diagnosed
SAMPLE_28228	SINGLE_7288	SINGLE	agilentV5	HiSeq4000	150	diagnosed
SAMPLE_28229	SINGLE_7289	SINGLE	agilentV5	HiSeq4000	150	diagnosed
SAMPLE_28236	SINGLE_7296	SINGLE	agilentV5	HiSeq4000	150	diagnosed
SAMPLE_28238	SINGLE_7298	SINGLE	agilentV5	HiSeq4000	150	diagnosed
SAMPLE_28246	SINGLE_7306	SINGLE	agilentV5	HiSeq4000	150	diagnosed
SAMPLE_28258	SINGLE_7318	SINGLE	agilentV5	HiSeq4000	150	diagnosed
SAMPLE_28262	SINGLE_7322	SINGLE	agilentV5	HiSeq4000	150	diagnosed
SAMPLE_28267	SINGLE_7327	SINGLE	agilentV5	HiSeq4000	150	diagnosed
SAMPLE_28268	SINGLE_7328	SINGLE	agilentV5	HiSeq4000	150	diagnosed
SAMPLE_28269	SINGLE_7329	SINGLE	agilentV5	HiSeq4000	150	diagnosed
[truncated: 39,756 more rows]
