# Supplementary material for: Systematic analysis of paralogous regions in 41,755 exomes uncovers clinically relevant variation
Source: Research Square preprint supplement (doi:10.21203/rs.3.rs-2302399/v1), 2022-11-29
Supplement: Supplementary file 5 [file STable13.xlsx]

## Sheet: STable13
Sample	Chrom	ConversionStart	ConversionEnd	Recurrence	IntroducedVariant	GeneName	Consequence
SAMPLE_21199	chr6	31991086	32000726	25	chr6_31995139_31995139_A/G	C4B	missense_variant
SAMPLE_21199	chr6	31991086	32000726	25	chr6_31996297_31996297_G/A	C4B	missense_variant
SAMPLE_21199	chr6	31991086	32000726	25	chr6_31996598_31996598_T/C	C4B	missense_variant
SAMPLE_21199	chr6	31991086	32000726	25	chr6_31996601_31996601_C/G	C4B	missense_variant
SAMPLE_21199	chr6	31991086	32000726	25	chr6_31996609_31996609_A/T	C4B	missense_variant
SAMPLE_21199	chr6	31991086	32000726	25	chr6_31996612_31996612_C/G	C4B	missense_variant
SAMPLE_21199	chr6	31991086	32000726	25	chr6_31996966_31996966_G/A	C4B	missense_variant
SAMPLE_21199	chr6	31991086	32000726	25	chr6_31997059_31997059_C/T	C4B	missense_variant
SAMPLE_21199	chr6	31991086	32000726	25	chr6_31997068_31997068_G/T	C4B	missense_variant
SAMPLE_21199	chr6	31991086	32000726	25	chr6_31997522_31997522_G/T	C4B	missense_variant
SAMPLE_23436	chr6	31991086	32000726	25	chr6_31995139_31995139_A/G	C4B	missense_variant
SAMPLE_23436	chr6	31991086	32000726	25	chr6_31996297_31996297_G/A	C4B	missense_variant
SAMPLE_23436	chr6	31991086	32000726	25	chr6_31996598_31996598_T/C	C4B	missense_variant
SAMPLE_23436	chr6	31991086	32000726	25	chr6_31996601_31996601_C/G	C4B	missense_variant
SAMPLE_23436	chr6	31991086	32000726	25	chr6_31996609_31996609_A/T	C4B	missense_variant
SAMPLE_23436	chr6	31991086	32000726	25	chr6_31996612_31996612_C/G	C4B	missense_variant
SAMPLE_23436	chr6	31991086	32000726	25	chr6_31996966_31996966_G/A	C4B	missense_variant
SAMPLE_23436	chr6	31991086	32000726	25	chr6_31997059_31997059_C/T	C4B	missense_variant
SAMPLE_23436	chr6	31991086	32000726	25	chr6_31997068_31997068_G/T	C4B	missense_variant
SAMPLE_23436	chr6	31991086	32000726	25	chr6_31997522_31997522_G/T	C4B	missense_variant
SAMPLE_23606	chr15	43890861	43897797	7	chr15_43892272_43892272_T/C	STRC	missense_variant
SAMPLE_23606	chr15	43890861	43897797	7	chr15_43892807_43892807_G/A	STRC	missense_variant
SAMPLE_23606	chr15	43890861	43897797	7	chr15_43892822_43892822_C/A	STRC	missense_variant
SAMPLE_23606	chr15	43890861	43897797	7	chr15_43893602_43893602_T/A	STRC	missense_variant
SAMPLE_23606	chr15	43890861	43897797	7	chr15_43893673_43893673_C/T	STRC	missense_variant
SAMPLE_23606	chr15	43890861	43897797	7	chr15_43893725_43893725_G/C	STRC	missense_variant
SAMPLE_23606	chr15	43890861	43897797	7	chr15_43895441_43895441_T/C	STRC	missense_variant,splice_region_variant
SAMPLE_23606	chr15	43890861	43897797	7	chr15_43895442_43895442_G/A	STRC	stop_gained,splice_region_variant
SAMPLE_23606	chr15	43890861	43897797	7	chr15_43895468_43895468_A/G	STRC	missense_variant
SAMPLE_23606	chr15	43890861	43897797	7	chr15_43895520_43895520_C/T	STRC	missense_variant
SAMPLE_23606	chr15	43890861	43897797	7	chr15_43895560_43895560_C/G	STRC	missense_variant
SAMPLE_23606	chr15	43890861	43897797	7	chr15_43896265_43896265_T/C	STRC	missense_variant
SAMPLE_23606	chr15	43890861	43897797	7	chr15_43896918_43896918_G/A	STRC	stop_gained
SAMPLE_24323	chr16	21747381	21747911	3	chr16_21747633_21747633_A/C	OTOA	missense_variant
SAMPLE_24323	chr16	21747381	21747911	3	chr16_21747639_21747639_G/T	OTOA	stop_gained
SAMPLE_24323	chr16	21747381	21747911	3	chr16_21747697_21747697_A/C	OTOA	missense_variant
SAMPLE_6307	chr7	6016919	6018627	132	chr7_6017340_6017340_T/C	PMS2	missense_variant
SAMPLE_6610	chr7	6016919	6018627	132	chr7_6017340_6017340_T/C	PMS2	missense_variant
SAMPLE_8275	chr7	6016919	6018627	132	chr7_6017340_6017340_T/C	PMS2	missense_variant
SAMPLE_28419	chr7	6016919	6018627	132	chr7_6017340_6017340_T/C	PMS2	missense_variant
SAMPLE_28932	chr1	196758598	196759972	15	chr1_196759282_196759282_C/T	CFHR3	missense_variant
SAMPLE_29813	chr16	21747381	21747911	3	chr16_21747633_21747633_A/C	OTOA	missense_variant
SAMPLE_29813	chr16	21747381	21747911	3	chr16_21747639_21747639_G/T	OTOA	stop_gained
SAMPLE_29813	chr16	21747381	21747911	3	chr16_21747697_21747697_A/C	OTOA	missense_variant
SAMPLE_29821	chr7	6016919	6018627	132	chr7_6017340_6017340_T/C	PMS2	missense_variant
SAMPLE_30025	chr16	21747381	21747911	3	chr16_21747633_21747633_A/C	OTOA	missense_variant
SAMPLE_30025	chr16	21747381	21747911	3	chr16_21747639_21747639_G/T	OTOA	stop_gained
SAMPLE_30025	chr16	21747381	21747911	3	chr16_21747697_21747697_A/C	OTOA	missense_variant
SAMPLE_31738	chr7	6016919	6018627	132	chr7_6017340_6017340_T/C	PMS2	missense_variant
SAMPLE_34194	chr7	6016919	6018627	132	chr7_6017340_6017340_T/C	PMS2	missense_variant
SAMPLE_40592	chr7	6016919	6018627	132	chr7_6017340_6017340_T/C	PMS2	missense_variant
SAMPLE_26907	chr5	70247601	70248925	6	chr5_70247773_70247773_C/T	SMN1	synonymous_variant
SAMPLE_28821	chr5	70247601	70248925	6	chr5_70247773_70247773_C/T	SMN1	synonymous_variant
SAMPLE_36286	chr5	70247601	70248925	6	chr5_70247773_70247773_C/T	SMN1	synonymous_variant
SAMPLE_37053	chr5	70247601	70248925	6	chr5_70247773_70247773_C/T	SMN1	synonymous_variant
SAMPLE_39455	chr5	70247601	70248925	6	chr5_70247773_70247773_C/T	SMN1	synonymous_variant
SAMPLE_20848	chr5	70247601	70248925	6	chr5_70247773_70247773_C/T	SMN1	synonymous_variant
