# Supplementary material for: Systematic analysis of paralogous regions in 41,755 exomes uncovers clinically relevant variation
Source: Research Square preprint supplement (doi:10.21203/rs.3.rs-2302399/v1), 2022-11-29
Supplement: Supplementary file 6 [file STable14.xlsx]

## Sheet: STable14
Sample	NrOfReadsOnSTRC (#STRC)	NrOfReadsOnSTRCP1 (#STRCP1)	#STRC/#STRCP1	%STRC	EstimatedCopiesOfSTRC	EstimatedCopiesOfSTRCP1	HearingImpairment
SAMPLE_39348	0	984	0	0	0	2	0
SAMPLE_35267	0	943	0	0	0	2	1
SAMPLE_37773	0	1796	0	0	0	4	1
SAMPLE_21265	0	1759	0	0	0	4	1
SAMPLE_24738	0	1498	0	0	0	4	1
SAMPLE_25664	0	2141	0	0	0	4	1
SAMPLE_39656	1	1595	0.001	0.000626566	0	4	1
SAMPLE_39655	2	2053	0.001	0.000973236	0	4	1
SAMPLE_23352	4	3390	0.001	0.00117855	0	4	1
SAMPLE_23414	2	1519	0.001	0.00131492	0	2	1
SAMPLE_25250	2	1390	0.001	0.00143678	0	4	1
SAMPLE_41045	3	1887	0.002	0.0015873	0	4	1
SAMPLE_21341	3	1849	0.002	0.00161987	0	2	1
SAMPLE_24680	2	1131	0.002	0.00176523	0	2	1
SAMPLE_37743	2	1130	0.002	0.00176678	0	2	1
SAMPLE_36516	2	1073	0.002	0.00186047	0	2	1
SAMPLE_27451	2	1031	0.002	0.00193611	0	2	1
SAMPLE_22882	5	2538	0.002	0.00196618	0	4	1
SAMPLE_35143	4	1918	0.002	0.00208117	0	4	1
SAMPLE_25723	4	1712	0.002	0.002331	0	2	1
SAMPLE_27231	4	1663	0.002	0.00239952	0	4	1
SAMPLE_23736	4	1645	0.002	0.00242571	0	2	1
SAMPLE_29934	5	2033	0.002	0.00245339	0	4	1
SAMPLE_21568	4	1608	0.002	0.00248139	0	2	1
SAMPLE_23606	8	2987	0.003	0.00267112	0	4	1
SAMPLE_23961	4	1421	0.003	0.00280702	0	2	1
SAMPLE_22570	4	1406	0.003	0.00283688	0	2	1
SAMPLE_27685	6	2076	0.003	0.00288184	0	4	1
SAMPLE_23334	10	3059	0.003	0.00325839	0	4	1
SAMPLE_31744	5	1405	0.004	0.0035461	0	2	1
SAMPLE_37959	4	1110	0.004	0.00359066	0	2	1
SAMPLE_37173	6	1496	0.004	0.00399467	0	4	1
SAMPLE_31817	8	1986	0.004	0.00401204	0	4	1
SAMPLE_21194	8	1965	0.004	0.00405474	0	2	1
SAMPLE_38879	5	1223	0.004	0.00407166	0	2	1
SAMPLE_21134	6	1385	0.004	0.00431344	0	4	1
SAMPLE_30884	5	1012	0.005	0.00491642	0	2	1
SAMPLE_21430	10	1876	0.005	0.00530223	0	4	1
SAMPLE_20982	12	2075	0.006	0.00574988	0	4	1
SAMPLE_39700	6	1022	0.006	0.00583658	0	2	1
SAMPLE_28080	8	1311	0.006	0.0060652	0	2	1
SAMPLE_30907	10	1590	0.006	0.00625	0	2	1
SAMPLE_30474	6	908	0.007	0.00656455	0	2	0
SAMPLE_32505	10	1462	0.007	0.00679348	0	2	1
SAMPLE_23311	28	3857	0.007	0.00720721	0	4	1
SAMPLE_29702	8	1055	0.008	0.00752587	0	2	1
SAMPLE_21814	13	1614	0.008	0.00799017	0	2	1
SAMPLE_28489	10	1161	0.009	0.00853971	0	2	1
SAMPLE_29701	8	915	0.009	0.00866739	0	2	1
SAMPLE_29492	10	1078	0.009	0.00919118	0	2	1
SAMPLE_22078	14	1463	0.01	0.00947867	0	2	1
SAMPLE_29277	12	1099	0.011	0.0108011	0	2	1
SAMPLE_23014	22	1929	0.011	0.0112763	0	2	0
SAMPLE_34932	13	1126	0.012	0.0114135	0	2	1
SAMPLE_34681	18	1449	0.012	0.0122699	0	4	1
SAMPLE_25363	17	1320	0.013	0.012715	0	2	1
SAMPLE_31067	20	1515	0.013	0.0130293	0	4	1
SAMPLE_33716	14	908	0.015	0.0151844	0	2	1
SAMPLE_30050	20	1072	0.019	0.018315	0	2	1
SAMPLE_30032	14	724	0.019	0.0189702	0	2	1
SAMPLE_28860	22	1117	0.02	0.0193152	0	2	1
SAMPLE_28471	30	1298	0.023	0.0225904	0	2	1
SAMPLE_29887	28	1181	0.024	0.0231596	0	2	1
SAMPLE_36289	46	1188	0.039	0.0372771	1	3	1
SAMPLE_28615	72	1510	0.048	0.045512	1	3	1
SAMPLE_35086	92	1377	0.067	0.0626276	1	3	1
SAMPLE_29146	174	2216	0.079	0.0728033	1	3	1
SAMPLE_32313	491	2165	0.227	0.184864	1	3	0
SAMPLE_20752	432	1728	0.25	0.2	1	3	0
SAMPLE_10927	662	2398	0.276	0.21634	1	3	0
SAMPLE_10929	668	2406	0.278	0.217306	1	3	0
SAMPLE_22384	924	3219	0.287	0.223027	1	3	1
SAMPLE_22753	668	2327	0.287	0.223038	1	3	0
SAMPLE_2458	740	2542	0.291	0.225472	1	3	0
SAMPLE_18340	515	1769	0.291	0.225482	1	3	0
SAMPLE_3477	721	2462	0.293	0.226516	1	3	0
SAMPLE_39706	470	1600	0.294	0.227053	1	3	0
SAMPLE_16314	455	1547	0.294	0.227273	1	3	0
SAMPLE_6986	474	1595	0.297	0.229096	1	3	0
SAMPLE_12241	470	1578	0.298	0.229492	1	3	0
SAMPLE_7713	550	1846	0.298	0.229549	1	3	0
SAMPLE_31252	587	1962	0.299	0.230286	1	3	0
SAMPLE_39179	256	851	0.301	0.231256	0*	2	1
SAMPLE_23269	788	2619	0.301	0.231289	1	3	0
SAMPLE_40084	503	1671	0.301	0.231371	1	3	0
SAMPLE_2542	562	1861	0.302	0.231944	1	3	0
SAMPLE_34347	474	1569	0.302	0.232012	1	3	0
SAMPLE_2543	545	1794	0.304	0.233006	1	3	0
SAMPLE_2568	502	1652	0.304	0.233055	1	3	0
SAMPLE_23237	536	1762	0.304	0.233246	1	3	0
SAMPLE_14306	432	1414	0.306	0.23402	1	3	0
SAMPLE_22382	681	2227	0.306	0.234182	1	3	0
SAMPLE_20021	699	2274	0.307	0.235116	1	3	0
SAMPLE_3475	754	2448	0.308	0.235478	1	3	0
SAMPLE_32576	844	2735	0.309	0.23582	1	3	0
SAMPLE_12504	430	1385	0.31	0.236915	1	3	0
SAMPLE_4266	699	2250	0.311	0.23703	1	3	0
SAMPLE_37035	440	1412	0.312	0.237581	1	3	0
SAMPLE_26917	598	1916	0.312	0.237868	1	3	0
SAMPLE_29908	485	1552	0.312	0.238095	1	3	0
SAMPLE_29169	398	1273	0.313	0.238181	1	3	1
SAMPLE_28840	533	1704	0.313	0.238266	1	3	0
SAMPLE_37893	485	1549	0.313	0.238446	1	3	0
SAMPLE_11519	434	1385	0.313	0.238593	1	3	0
SAMPLE_39209	655	2084	0.314	0.239138	1	3	0
SAMPLE_24621	860	2730	0.315	0.239554	1	3	0
SAMPLE_22244	666	2111	0.315	0.239827	1	3	0
SAMPLE_17860	359	1135	0.316	0.240295	1	3	0
SAMPLE_36757	512	1618	0.316	0.240376	1	3	0
SAMPLE_31791	762	2408	0.316	0.240379	1	3	0
SAMPLE_20753	548	1731	0.317	0.240456	1	3	0
SAMPLE_32937	487	1536	0.317	0.240732	1	3	0
SAMPLE_20159	563	1774	0.317	0.240907	1	3	0
SAMPLE_39075	420	1322	0.318	0.241102	1	3	0
SAMPLE_21493	588	1850	0.318	0.241181	1	3	0
SAMPLE_7711	521	1635	0.319	0.241651	1	3	0
SAMPLE_9456	511	1602	0.319	0.241836	1	3	0
SAMPLE_23753	847	2654	0.319	0.241931	1	3	1
SAMPLE_40640	470	1472	0.319	0.242019	1	3	0
SAMPLE_39275	585	1823	0.321	0.24294	1	3	1
SAMPLE_37309	467	1455	0.321	0.242976	1	3	0
SAMPLE_19901	473	1473	0.321	0.243063	1	3	0
SAMPLE_19598	655	2037	0.322	0.243314	1	3	0
SAMPLE_22187	538	1670	0.322	0.243659	1	3	0
SAMPLE_33739	578	1786	0.324	0.244501	1	3	1
SAMPLE_17125	569	1758	0.324	0.244521	1	3	0
SAMPLE_12242	450	1390	0.324	0.244565	1	3	0
SAMPLE_12228	549	1695	0.324	0.244652	1	3	0
SAMPLE_12226	453	1398	0.324	0.244733	1	3	0
SAMPLE_264	982	3028	0.324	0.244888	1	3	0
SAMPLE_35336	445	1372	0.324	0.244909	1	3	0
SAMPLE_41447	854	2631	0.325	0.24505	1	3	1
SAMPLE_16969	508	1565	0.325	0.245055	1	3	0
SAMPLE_8503	512	1577	0.325	0.245093	1	3	0
SAMPLE_37767	467	1433	0.326	0.245789	1	3	0
SAMPLE_645	499	1528	0.327	0.246177	1	3	0
SAMPLE_23089	715	2177	0.328	0.247234	1	3	1
SAMPLE_37572	524	1595	0.329	0.247286	1	3	0
SAMPLE_34130	538	1636	0.329	0.24747	1	3	0
SAMPLE_28532	646	1963	0.329	0.247604	1	3	0
SAMPLE_17655	478	1452	0.329	0.247668	1	3	0
SAMPLE_39208	486	1475	0.329	0.247833	1	3	0
SAMPLE_24745	598	1814	0.33	0.247927	1	3	0
SAMPLE_40197	474	1435	0.33	0.248298	1	3	0
SAMPLE_31052	594	1797	0.331	0.248432	1	3	1
SAMPLE_19647	496	1500	0.331	0.248497	1	3	0
SAMPLE_11106	565	1708	0.331	0.24857	1	3	0
SAMPLE_19900	530	1602	0.331	0.248593	1	3	0
SAMPLE_18065	574	1734	0.331	0.2487	1	3	0
SAMPLE_16034	529	1597	0.331	0.248824	1	3	0
SAMPLE_11104	634	1905	0.333	0.249705	1	3	0
SAMPLE_28748	645	1938	0.333	0.24971	1	3	1
SAMPLE_37159	448	1346	0.333	0.249721	1	3	0
SAMPLE_22851	699	2098	0.333	0.249911	1	3	0
SAMPLE_27009	564	1691	0.334	0.250111	1	3	0
SAMPLE_19823	529	1584	0.334	0.250355	1	3	0
SAMPLE_39465	465	1391	0.334	0.250539	1	3	1
SAMPLE_41730	809	2417	0.335	0.250775	1	3	0
SAMPLE_5645	856	2543	0.337	0.251839	1	3	0
SAMPLE_39428	650	1931	0.337	0.25184	1	3	0
SAMPLE_17087	536	1591	0.337	0.251998	1	3	0
SAMPLE_21039	840	2492	0.337	0.252101	1	3	0
SAMPLE_14305	461	1367	0.337	0.252188	1	3	0
SAMPLE_37923	448	1328	0.337	0.252252	1	3	0
SAMPLE_2460	742	2199	0.337	0.252295	1	3	0
SAMPLE_30205	533	1577	0.338	0.252607	1	3	0
SAMPLE_6761	634	1875	0.338	0.25269	1	3	0
SAMPLE_38023	566	1673	0.338	0.252791	1	3	0
SAMPLE_9789	564	1664	0.339	0.253142	1	3	0
SAMPLE_19645	587	1731	0.339	0.253236	1	3	0
SAMPLE_39350	368	1084	0.339	0.253444	1	3	0
SAMPLE_21026	764	2247	0.34	0.253736	1	3	0
SAMPLE_41731	896	2616	0.343	0.255125	1	3	0
SAMPLE_19837	551	1608	0.343	0.255211	1	3	0
SAMPLE_39298	513	1497	0.343	0.255224	1	3	0
SAMPLE_23131	725	2113	0.343	0.255462	1	3	1
SAMPLE_36975	319	929	0.343	0.255609	1	3	0
SAMPLE_17126	534	1555	0.343	0.255625	1	3	0
SAMPLE_24510	826	2405	0.343	0.255648	1	3	0
SAMPLE_23682	612	1775	0.345	0.256389	1	3	0
SAMPLE_19566	538	1558	0.345	0.256679	1	3	0
SAMPLE_10790	599	1734	0.345	0.256751	1	3	0
SAMPLE_11518	488	1412	0.346	0.256842	1	3	0
SAMPLE_33317	726	2099	0.346	0.256991	1	3	0
SAMPLE_12161	893	2578	0.346	0.257275	1	3	0
SAMPLE_16836	498	1435	0.347	0.257631	1	3	0
SAMPLE_24859	787	2264	0.348	0.257948	1	3	0
SAMPLE_20158	508	1461	0.348	0.257999	1	3	0
SAMPLE_30955	602	1731	0.348	0.258037	1	3	0
SAMPLE_1090	755	2170	0.348	0.25812	1	3	0
SAMPLE_6760	726	2085	0.348	0.258271	1	3	0
SAMPLE_981	742	2127	0.349	0.258627	1	3	0
SAMPLE_19839	566	1619	0.35	0.259039	1	3	0
SAMPLE_20853	810	2313	0.35	0.259366	1	3	0
SAMPLE_17077	461	1313	0.351	0.259865	1	3	0
SAMPLE_14586	664	1886	0.352	0.260392	1	3	0
SAMPLE_19923	991	2811	0.353	0.260652	1	3	0
SAMPLE_2566	838	2376	0.353	0.260734	1	3	0
SAMPLE_39429	586	1658	0.353	0.261141	1	3	0
SAMPLE_39453	649	1834	0.354	0.261377	1	3	0
SAMPLE_12403	736	2075	0.355	0.261829	1	3	0
SAMPLE_37770	513	1446	0.355	0.261868	1	3	0
SAMPLE_13749	512	1441	0.355	0.262161	1	3	0
SAMPLE_26156	633	1781	0.355	0.26222	1	3	0
SAMPLE_24251	748	2101	0.356	0.262548	1	3	0
SAMPLE_18341	557	1559	0.357	0.263233	1	3	0
SAMPLE_39568	498	1385	0.36	0.264472	1	3	0
SAMPLE_28036	536	1490	0.36	0.264561	1	3	0
SAMPLE_39413	665	1842	0.361	0.265257	1	3	0
SAMPLE_18064	542	1501	0.361	0.265296	1	3	0
SAMPLE_12405	706	1947	0.363	0.266114	1	3	0
SAMPLE_41072	958	2640	0.363	0.266259	1	3	0
SAMPLE_19564	577	1590	0.363	0.266267	1	3	0
SAMPLE_10042	640	1762	0.363	0.266445	1	3	0
SAMPLE_32635	958	2634	0.364	0.266704	1	3	0
SAMPLE_13872	615	1687	0.365	0.267159	1	3	0
SAMPLE_39210	480	1314	0.365	0.267559	1	3	0
SAMPLE_37835	481	1312	0.367	0.268265	1	3	0
SAMPLE_28735	713	1933	0.369	0.269463	1	3	0
SAMPLE_31526	823	2223	0.37	0.27019	1	3	0
SAMPLE_26135	600	1611	0.372	0.27137	1	3	0
SAMPLE_16970	604	1619	0.373	0.271705	1	3	0
SAMPLE_29291	772	2052	0.376	0.273371	1	3	0
SAMPLE_39251	605	1601	0.378	0.274252	1	3	0
SAMPLE_37489	592	1563	0.379	0.27471	1	3	1
SAMPLE_29283	647	1702	0.38	0.275436	1	3	0
SAMPLE_12502	528	1386	0.381	0.275862	1	3	1
SAMPLE_14119	596	1558	0.383	0.276695	1	3	0
SAMPLE_17174	586	1520	0.386	0.278253	1	3	0
SAMPLE_39936	598	1550	0.386	0.278399	1	3	0
SAMPLE_25293	479	1237	0.387	0.279138	1	3	0
SAMPLE_10950	444	1143	0.388	0.279773	1	3	0
SAMPLE_16598	509	1306	0.39	0.280441	1	3	0
SAMPLE_25203	806	2066	0.39	0.280641	1	3	0
SAMPLE_16834	495	1259	0.393	0.282212	1	3	0
SAMPLE_26828	856	2146	0.399	0.285143	1	3	1
SAMPLE_8505	647	1611	0.402	0.286537	1	3	0
SAMPLE_35489	473	1176	0.402	0.286841	1	3	0
SAMPLE_5302	544	1342	0.405	0.288441	1	3	0
SAMPLE_17079	577	1407	0.41	0.290827	1	2	0
SAMPLE_6985	474	1151	0.412	0.291692	1	2	0
SAMPLE_5068	604	1466	0.412	0.291787	1	2	0
SAMPLE_33872	382	926	0.413	0.292049	1	2	0
SAMPLE_29997	570	1365	0.418	0.294574	1	2	0
SAMPLE_16330	413	989	0.418	0.294579	1	2	0
SAMPLE_18181	489	1163	0.42	0.296005	1	2	0
SAMPLE_5815	663	1575	0.421	0.296247	1	2	0
SAMPLE_21956	1065	2525	0.422	0.296657	1	2	0
SAMPLE_11084	612	1448	0.423	0.297087	1	2	0
SAMPLE_32238	574	1354	0.424	0.297718	1	2	0
SAMPLE_23897	853	2010	0.424	0.297939	1	2	0
SAMPLE_27448	610	1433	0.426	0.298581	1	2	1
SAMPLE_25036	544	1277	0.426	0.298737	1	2	0
SAMPLE_17	702	1647	0.426	0.298851	1	2	0
SAMPLE_34301	523	1227	0.426	0.298857	1	2	0
SAMPLE_33532	644	1505	0.428	0.299674	1	2	0
SAMPLE_4632	670	1565	0.428	0.299776	1	2	0
SAMPLE_27671	730	1705	0.428	0.299795	1	2	0
SAMPLE_4158	666	1554	0.429	0.3	1	2	0
SAMPLE_27667	471	1096	0.43	0.300574	1	2	0
SAMPLE_40601	466	1084	0.43	0.300645	1	2	0
SAMPLE_23602	597	1386	0.431	0.301059	1	2	0
SAMPLE_39268	455	1056	0.431	0.301125	1	2	0
SAMPLE_4264	844	1955	0.432	0.301536	1	2	0
SAMPLE_4026	665	1538	0.432	0.301861	1	2	0
SAMPLE_31879	432	997	0.433	0.302309	1	2	0
SAMPLE_35930	499	1149	0.434	0.302791	1	2	0
SAMPLE_39779	510	1173	0.435	0.30303	1	2	0
SAMPLE_21967	579	1331	0.435	0.303141	1	2	0
SAMPLE_13755	639	1458	0.438	0.304721	1	2	0
SAMPLE_18749	572	1305	0.438	0.304742	1	2	0
SAMPLE_9450	558	1271	0.439	0.305085	1	2	0
SAMPLE_37877	622	1416	0.439	0.305201	1	2	0
SAMPLE_23898	749	1704	0.44	0.30534	1	2	0
SAMPLE_22611	754	1715	0.44	0.305387	1	2	1
SAMPLE_22095	557	1264	0.441	0.305876	1	2	0
SAMPLE_40647	474	1075	0.441	0.306004	1	2	0
SAMPLE_22096	576	1305	0.441	0.30622	1	2	1
SAMPLE_13662	584	1320	0.442	0.306723	1	2	0
SAMPLE_24428	570	1288	0.443	0.306781	1	2	0
SAMPLE_32880	605	1367	0.443	0.306795	1	2	1
SAMPLE_16677	452	1017	0.444	0.307692	1	2	0
SAMPLE_5359	700	1573	0.445	0.307963	1	2	0
SAMPLE_40215	508	1141	0.445	0.308065	1	2	0
SAMPLE_5626	673	1508	0.446	0.308574	1	2	0
SAMPLE_3788	619	1387	0.446	0.308574	1	2	0
SAMPLE_3612	627	1403	0.447	0.308867	1	2	0
SAMPLE_15581	450	1006	0.447	0.309066	1	2	0
SAMPLE_18671	527	1177	0.448	0.309272	1	2	0
SAMPLE_26884	680	1516	0.449	0.309654	1	2	1
SAMPLE_33166	626	1395	0.449	0.309748	1	2	0
SAMPLE_37651	465	1036	0.449	0.309793	1	2	0
SAMPLE_2681	575	1280	0.449	0.309973	1	2	0
SAMPLE_17259	560	1244	0.45	0.310421	1	2	0
SAMPLE_21846	787	1744	0.451	0.310944	1	2	0
SAMPLE_36016	408	904	0.451	0.310976	1	2	1
SAMPLE_3164	1075	2380	0.452	0.311143	1	2	0
SAMPLE_25223	602	1332	0.452	0.311272	1	2	0
SAMPLE_19252	495	1095	0.452	0.311321	1	2	0
SAMPLE_35554	769	1700	0.452	0.311462	1	2	0
SAMPLE_18055	547	1209	0.452	0.311503	1	2	0
SAMPLE_3032	596	1317	0.453	0.311553	1	2	0
SAMPLE_2457	644	1421	0.453	0.311864	1	2	0
SAMPLE_32802	654	1443	0.453	0.311874	1	2	0
SAMPLE_22521	505	1113	0.454	0.312114	1	2	0
SAMPLE_16033	491	1082	0.454	0.312142	1	2	0
SAMPLE_30676	488	1075	0.454	0.31222	1	2	0
SAMPLE_14058	659	1450	0.454	0.31247	1	2	0
SAMPLE_10326	576	1267	0.455	0.312534	1	2	0
SAMPLE_1070	527	1159	0.455	0.312574	1	2	0
SAMPLE_11760	538	1183	0.455	0.312609	1	2	0
SAMPLE_117	847	1861	0.455	0.312777	1	2	0
SAMPLE_33198	685	1505	0.455	0.312785	1	2	0
SAMPLE_4751	694	1522	0.456	0.313177	1	2	0
SAMPLE_21698	411	901	0.456	0.313262	1	2	0
SAMPLE_35500	530	1161	0.457	0.313424	1	2	0
SAMPLE_27736	665	1456	0.457	0.313531	1	2	0
SAMPLE_23639	1078	2359	0.457	0.313646	1	2	0
SAMPLE_18098	486	1062	0.458	0.313953	1	2	0
SAMPLE_2433	740	1616	0.458	0.314092	1	2	0
SAMPLE_29121	661	1443	0.458	0.314163	1	2	0
SAMPLE_22128	685	1494	0.459	0.314364	1	2	1
SAMPLE_23669	670	1460	0.459	0.314554	1	2	1
SAMPLE_13575	778	1695	0.459	0.314598	1	2	0
SAMPLE_4721	1189	2588	0.459	0.3148	1	2	0
SAMPLE_15702	437	951	0.46	0.314841	1	2	0
SAMPLE_7706	568	1236	0.46	0.314856	1	2	0
SAMPLE_34308	469	1020	0.46	0.314976	1	2	1
SAMPLE_39594	553	1202	0.46	0.3151	1	2	0
SAMPLE_23808	820	1782	0.46	0.315142	1	2	0
SAMPLE_40402	633	1375	0.46	0.315239	1	2	0
SAMPLE_32113	314	682	0.46	0.315261	1	2	0
SAMPLE_17672	495	1073	0.461	0.315689	1	2	0
SAMPLE_11755	466	1010	0.461	0.315718	1	2	0
SAMPLE_36366	506	1096	0.462	0.315855	1	2	0
SAMPLE_31707	664	1438	0.462	0.31589	1	2	0
SAMPLE_13512	642	1390	0.462	0.315945	1	2	0
SAMPLE_23569	578	1250	0.462	0.316193	1	2	0
SAMPLE_9836	476	1029	0.463	0.316279	1	2	0
SAMPLE_2738	777	1677	0.463	0.316626	1	2	0
SAMPLE_39191	521	1124	0.464	0.316717	1	2	0
SAMPLE_16121	566	1221	0.464	0.316732	1	2	0
SAMPLE_22338	702	1513	0.464	0.31693	1	2	0
SAMPLE_1742	700	1508	0.464	0.317029	1	2	0
SAMPLE_16571	620	1334	0.465	0.317298	1	2	0
SAMPLE_8624	498	1071	0.465	0.3174	1	2	0
SAMPLE_34462	575	1235	0.466	0.31768	1	2	0
SAMPLE_24496	685	1471	0.466	0.317718	1	2	0
SAMPLE_24547	613	1315	0.466	0.317946	1	2	0
SAMPLE_9695	519	1113	0.466	0.318015	1	2	0
SAMPLE_36794	473	1014	0.466	0.31809	1	2	0
SAMPLE_2088	857	1836	0.467	0.318232	1	2	0
SAMPLE_27001	543	1163	0.467	0.318288	1	2	0
SAMPLE_2621	647	1385	0.467	0.318406	1	2	0
SAMPLE_33090	614	1312	0.468	0.318795	1	2	0
SAMPLE_28109	704	1504	0.468	0.318841	1	2	0
SAMPLE_23162	700	1495	0.468	0.318907	1	2	0
SAMPLE_19876	627	1339	0.468	0.318922	1	2	0
SAMPLE_38648	495	1057	0.468	0.318943	1	2	1
SAMPLE_22535	763	1629	0.468	0.31898	1	2	0
SAMPLE_29819	757	1616	0.468	0.319005	1	2	0
SAMPLE_32557	670	1430	0.469	0.319048	1	2	1
SAMPLE_37030	388	828	0.469	0.319079	1	2	0
SAMPLE_9386	586	1250	0.469	0.319172	1	2	0
SAMPLE_12951	493	1051	0.469	0.319301	1	2	0
SAMPLE_5361	730	1555	0.469	0.319475	1	2	0
SAMPLE_15500	520	1106	0.47	0.319803	1	2	0
SAMPLE_17861	541	1150	0.47	0.319929	1	2	0
SAMPLE_22258	561	1192	0.471	0.320023	1	2	0
SAMPLE_12758	401	852	0.471	0.320032	1	2	0
SAMPLE_23705	948	2014	0.471	0.320054	1	2	1
SAMPLE_22526	804	1708	0.471	0.320064	1	2	0
SAMPLE_22958	695	1476	0.471	0.320129	1	2	0
SAMPLE_1797	730	1550	0.471	0.320175	1	2	0
SAMPLE_37361	419	889	0.471	0.320336	1	2	0
SAMPLE_20583	1082	2295	0.471	0.320403	1	2	0
SAMPLE_21349	563	1194	0.472	0.320433	1	2	0
SAMPLE_27284	544	1153	0.472	0.320566	1	2	0
SAMPLE_18788	455	964	0.472	0.320648	1	2	0
SAMPLE_7758	599	1269	0.472	0.320664	1	2	0
SAMPLE_17007	866	1834	0.472	0.320741	1	2	0
SAMPLE_29965	510	1080	0.472	0.320755	1	2	1
SAMPLE_2387	559	1182	0.473	0.32108	1	2	0
SAMPLE_30882	597	1262	0.473	0.32114	1	2	0
SAMPLE_24507	648	1368	0.474	0.321429	1	2	0
SAMPLE_8408	605	1277	0.474	0.321467	1	2	0
SAMPLE_3312	587	1239	0.474	0.321468	1	2	0
SAMPLE_21238	463	977	0.474	0.321528	1	2	0
SAMPLE_34107	515	1086	0.474	0.321674	1	2	0
SAMPLE_8021	637	1343	0.474	0.321717	1	2	0
SAMPLE_20669	864	1821	0.474	0.321788	1	2	0
SAMPLE_28602	522	1100	0.475	0.321825	1	2	0
SAMPLE_7010	581	1223	0.475	0.322062	1	2	0
SAMPLE_3031	708	1490	0.475	0.322111	1	2	0
SAMPLE_8617	546	1149	0.475	0.322124	1	2	0
SAMPLE_35681	532	1119	0.475	0.322229	1	2	0
SAMPLE_26749	587	1234	0.476	0.32235	1	2	0
SAMPLE_13391	480	1009	0.476	0.322364	1	2	0
SAMPLE_27654	580	1219	0.476	0.322401	1	2	0
SAMPLE_30410	554	1164	0.476	0.322468	1	2	0
SAMPLE_38046	542	1138	0.476	0.322619	1	2	0
SAMPLE_31080	640	1343	0.477	0.322743	1	2	0
SAMPLE_15575	461	967	0.477	0.322829	1	2	0
SAMPLE_8659	570	1194	0.477	0.323129	1	2	0
SAMPLE_33467	507	1062	0.477	0.323136	1	2	0
SAMPLE_31139	446	934	0.478	0.323188	1	2	0
SAMPLE_25952	654	1369	0.478	0.323282	1	2	0
SAMPLE_13099	561	1174	0.478	0.323343	1	2	0
SAMPLE_33308	564	1180	0.478	0.323394	1	2	0
SAMPLE_39249	481	1006	0.478	0.32347	1	2	0
SAMPLE_4791	638	1334	0.478	0.323529	1	2	0
SAMPLE_37512	508	1062	0.478	0.323567	1	2	0
SAMPLE_8020	518	1082	0.479	0.32375	1	2	0
SAMPLE_31517	642	1341	0.479	0.323752	1	2	0
SAMPLE_18182	520	1086	0.479	0.323786	1	2	0
SAMPLE_9888	669	1397	0.479	0.323814	1	2	0
SAMPLE_27382	511	1067	0.479	0.323828	1	2	0
SAMPLE_41168	663	1384	0.479	0.323889	1	2	0
SAMPLE_38670	459	958	0.479	0.323924	1	2	0
SAMPLE_5465	625	1304	0.479	0.324002	1	2	0
SAMPLE_32716	660	1376	0.48	0.324165	1	2	0
SAMPLE_13304	685	1428	0.48	0.324184	1	2	0
SAMPLE_9950	475	990	0.48	0.324232	1	2	0
SAMPLE_40375	444	923	0.481	0.324799	1	2	0
SAMPLE_16746	486	1010	0.481	0.324866	1	2	0
SAMPLE_8765	642	1334	0.481	0.324899	1	2	0
SAMPLE_19709	488	1014	0.481	0.3249	1	2	0
SAMPLE_32969	559	1161	0.481	0.325	1	2	1
SAMPLE_33081	618	1283	0.482	0.325092	1	2	0
SAMPLE_27418	468	970	0.482	0.325452	1	2	0
SAMPLE_12029	539	1117	0.483	0.325483	1	2	0
SAMPLE_28560	554	1148	0.483	0.325499	1	2	0
SAMPLE_38126	597	1237	0.483	0.325518	1	2	1
SAMPLE_29424	490	1014	0.483	0.325798	1	2	0
SAMPLE_13173	434	898	0.483	0.325826	1	2	0
SAMPLE_25718	554	1146	0.483	0.325882	1	2	0
SAMPLE_24597	715	1479	0.483	0.325889	1	2	0
SAMPLE_4254	849	1756	0.483	0.325912	1	2	0
SAMPLE_21600	937	1938	0.483	0.325913	1	2	1
SAMPLE_18183	469	970	0.484	0.325921	1	2	0
SAMPLE_20378	515	1065	0.484	0.325949	1	2	0
SAMPLE_21446	1170	2419	0.484	0.325996	1	2	0
SAMPLE_22825	652	1348	0.484	0.326	1	2	1
SAMPLE_21625	570	1178	0.484	0.326087	1	2	1
SAMPLE_2574	738	1525	0.484	0.326116	1	2	0
SAMPLE_40126	1045	2158	0.484	0.326257	1	2	0
SAMPLE_4245	815	1683	0.484	0.326261	1	2	0
SAMPLE_36730	571	1179	0.484	0.326286	1	2	0
SAMPLE_9886	612	1262	0.485	0.326574	1	2	1
SAMPLE_18073	568	1171	0.485	0.326624	1	2	0
SAMPLE_22999	733	1510	0.485	0.326794	1	2	1
SAMPLE_23367	861	1773	0.486	0.326879	1	2	0
SAMPLE_30090	486	1000	0.486	0.327052	1	2	0
SAMPLE_40044	610	1254	0.486	0.327253	1	2	0
SAMPLE_18506	446	915	0.487	0.3277	1	2	0
SAMPLE_28341	588	1206	0.488	0.327759	1	2	1
SAMPLE_19877	675	1384	0.488	0.327829	1	2	0
SAMPLE_24826	936	1919	0.488	0.327846	1	2	0
SAMPLE_6069	544	1115	0.488	0.327908	1	2	0
SAMPLE_12949	452	926	0.488	0.328012	1	2	0
SAMPLE_10120	584	1196	0.488	0.32809	1	2	0
SAMPLE_11757	733	1501	0.488	0.328111	1	2	0
SAMPLE_41674	799	1636	0.488	0.328131	1	2	0
SAMPLE_40480	613	1255	0.488	0.328158	1	2	0
SAMPLE_5289	720	1474	0.488	0.328168	1	2	0
SAMPLE_31515	728	1489	0.489	0.328372	1	2	1
SAMPLE_26671	711	1453	0.489	0.328558	1	2	0
SAMPLE_32822	570	1164	0.49	0.32872	1	2	0
SAMPLE_7742	673	1374	0.49	0.328774	1	2	0
SAMPLE_12420	656	1339	0.49	0.328822	1	2	0
SAMPLE_25095	576	1174	0.491	0.329143	1	2	0
SAMPLE_1084	1047	2133	0.491	0.329245	1	2	0
SAMPLE_3704	1084	2208	0.491	0.329283	1	2	0
SAMPLE_3207	599	1220	0.491	0.329302	1	2	0
SAMPLE_36170	466	949	0.491	0.329329	1	2	1
SAMPLE_20513	847	1724	0.491	0.329444	1	2	0
SAMPLE_30558	511	1039	0.492	0.329677	1	2	0
SAMPLE_14056	662	1346	0.492	0.329681	1	2	0
SAMPLE_40721	536	1089	0.492	0.329846	1	2	0
SAMPLE_29334	615	1249	0.492	0.329936	1	2	0
SAMPLE_23807	697	1415	0.493	0.330019	1	2	0
SAMPLE_22715	606	1230	0.493	0.330065	1	2	0
SAMPLE_6067	628	1274	0.493	0.330179	1	2	0
SAMPLE_32502	615	1247	0.493	0.33029	1	2	1
SAMPLE_6504	727	1474	0.493	0.330304	1	2	0
SAMPLE_22977	554	1123	0.493	0.330352	1	2	0
SAMPLE_20725	563	1141	0.493	0.330399	1	2	0
SAMPLE_19253	477	966	0.494	0.330561	1	2	0
SAMPLE_4720	1045	2115	0.494	0.330696	1	2	0
SAMPLE_10324	594	1202	0.494	0.330735	1	2	0
SAMPLE_38166	531	1073	0.495	0.331047	1	2	0
SAMPLE_20288	542	1095	0.495	0.331093	1	2	0
SAMPLE_27835	557	1125	0.495	0.331153	1	2	1
SAMPLE_8397	600	1211	0.495	0.331309	1	2	0
SAMPLE_29237	601	1213	0.495	0.331312	1	2	1
SAMPLE_16332	504	1017	0.496	0.331361	1	2	0
SAMPLE_25234	633	1277	0.496	0.331414	1	2	0
SAMPLE_22926	864	1743	0.496	0.331415	1	2	0
SAMPLE_39543	578	1166	0.496	0.331422	1	2	0
SAMPLE_15531	549	1107	0.496	0.331522	1	2	0
SAMPLE_31416	612	1234	0.496	0.331528	1	2	0
SAMPLE_27421	556	1121	0.496	0.331544	1	2	0
SAMPLE_3703	964	1943	0.496	0.331613	1	2	0
SAMPLE_5627	717	1444	0.497	0.331791	1	2	0
SAMPLE_7100	582	1172	0.497	0.331813	1	2	0
SAMPLE_4316	1043	2099	0.497	0.331954	1	2	0
SAMPLE_34169	499	1004	0.497	0.332003	1	2	0
SAMPLE_7606	593	1193	0.497	0.332027	1	2	0
SAMPLE_671	1129	2271	0.497	0.332059	1	2	0
SAMPLE_433	1059	2129	0.497	0.332183	1	2	0
SAMPLE_28941	734	1474	0.498	0.332428	1	2	0
SAMPLE_10811	754	1513	0.498	0.332598	1	2	0
SAMPLE_12376	631	1266	0.498	0.33263	1	2	0
SAMPLE_4780	554	1111	0.499	0.332733	1	2	0
SAMPLE_13586	757	1518	0.499	0.332747	1	2	0
SAMPLE_17106	759	1522	0.499	0.332749	1	2	0
SAMPLE_9880	492	986	0.499	0.332882	1	2	0
SAMPLE_25343	1052	2108	0.499	0.332911	1	2	0
SAMPLE_18174	542	1086	0.499	0.332924	1	2	0
SAMPLE_23562	858	1719	0.499	0.332945	1	2	0
SAMPLE_24088	892	1787	0.499	0.33296	1	2	0
SAMPLE_38849	430	861	0.499	0.333075	1	2	0
SAMPLE_34867	522	1045	0.5	0.333121	1	2	1
SAMPLE_35416	600	1200	0.5	0.333333	1	2	1
SAMPLE_16980	467	933	0.501	0.333571	1	2	0
SAMPLE_12413	549	1096	0.501	0.333739	1	2	0
SAMPLE_34108	515	1028	0.501	0.333765	1	2	0
SAMPLE_24877	747	1491	0.501	0.33378	1	2	0
SAMPLE_32470	697	1391	0.501	0.333812	1	2	0
SAMPLE_23516	649	1295	0.501	0.333848	1	2	1
SAMPLE_39340	1025	2045	0.501	0.333876	1	2	0
SAMPLE_39196	596	1189	0.501	0.333894	1	2	0
SAMPLE_2737	585	1167	0.501	0.333904	1	2	0
SAMPLE_5303	572	1141	0.501	0.333917	1	2	0
SAMPLE_1085	929	1853	0.501	0.333932	1	2	0
SAMPLE_20727	838	1671	0.501	0.333998	1	2	0
SAMPLE_25314	652	1300	0.502	0.334016	1	2	0
SAMPLE_11679	786	1567	0.502	0.334042	1	2	0
SAMPLE_31908	671	1336	0.502	0.33433	1	2	0
SAMPLE_25686	651	1296	0.502	0.334361	1	2	0
SAMPLE_41058	734	1461	0.502	0.334396	1	2	1
SAMPLE_11434	501	997	0.503	0.334446	1	2	0
SAMPLE_34336	494	983	0.503	0.334462	1	2	0
SAMPLE_14976	733	1458	0.503	0.33455	1	2	0
SAMPLE_22427	645	1282	0.503	0.334717	1	2	1
SAMPLE_27250	706	1403	0.503	0.334756	1	2	0
SAMPLE_8661	615	1222	0.503	0.334785	1	2	0
SAMPLE_35067	538	1069	0.503	0.334785	1	2	0
SAMPLE_3231	1216	2415	0.504	0.334894	1	2	0
SAMPLE_38395	542	1076	0.504	0.334981	1	2	0
SAMPLE_22649	850	1687	0.504	0.335041	1	2	0
SAMPLE_4750	958	1899	0.504	0.335317	1	2	0
SAMPLE_20491	1022	2025	0.505	0.335412	1	2	0
SAMPLE_5241	893	1769	0.505	0.335462	1	2	0
SAMPLE_29897	554	1097	0.505	0.335554	1	2	0
SAMPLE_35234	549	1087	0.505	0.335575	1	2	0
SAMPLE_40260	532	1053	0.505	0.335647	1	2	0
SAMPLE_15580	468	926	0.505	0.335725	1	2	0
SAMPLE_9657	729	1442	0.506	0.33579	1	2	0
SAMPLE_34406	504	996	0.506	0.336	1	2	0
SAMPLE_3163	1148	2268	0.506	0.336066	1	2	0
SAMPLE_13390	653	1290	0.506	0.336078	1	2	1
SAMPLE_33890	529	1045	0.506	0.336086	1	2	0
SAMPLE_975	631	1246	0.506	0.336175	1	2	0
SAMPLE_39902	624	1232	0.506	0.336207	1	2	0
SAMPLE_20329	616	1216	0.507	0.336245	1	2	0
SAMPLE_37647	524	1034	0.507	0.336329	1	2	1
SAMPLE_32456	443	874	0.507	0.336371	1	2	0
SAMPLE_24060	880	1736	0.507	0.336391	1	2	0
SAMPLE_28008	615	1213	0.507	0.336433	1	2	1
SAMPLE_434	1001	1974	0.507	0.336471	1	2	0
SAMPLE_28078	705	1390	0.507	0.336516	1	2	0
SAMPLE_15277	628	1238	0.507	0.336549	1	2	0
SAMPLE_13151	585	1153	0.507	0.336594	1	2	0
SAMPLE_18057	513	1011	0.507	0.336614	1	2	0
SAMPLE_20581	897	1765	0.508	0.336965	1	2	0
SAMPLE_28026	636	1251	0.508	0.337043	1	2	0
SAMPLE_32027	696	1369	0.508	0.337046	1	2	0
SAMPLE_35593	785	1544	0.508	0.337055	1	2	0
SAMPLE_40343	534	1050	0.509	0.337121	1	2	0
SAMPLE_37093	558	1097	0.509	0.33716	1	2	0
SAMPLE_30918	585	1150	0.509	0.337176	1	2	0
SAMPLE_5489	613	1205	0.509	0.337184	1	2	0
SAMPLE_14313	507	996	0.509	0.337325	1	2	0
SAMPLE_21334	810	1591	0.509	0.337359	1	2	1
SAMPLE_41514	943	1852	0.509	0.337388	1	2	0
SAMPLE_22706	886	1740	0.509	0.337395	1	2	0
SAMPLE_18505	465	913	0.509	0.337446	1	2	0
SAMPLE_27323	614	1205	0.51	0.337548	1	2	0
SAMPLE_18172	521	1022	0.51	0.337654	1	2	0
SAMPLE_36796	467	916	0.51	0.337672	1	2	1
SAMPLE_32398	822	1612	0.51	0.337716	1	2	0
SAMPLE_31528	765	1500	0.51	0.337748	1	2	0
SAMPLE_26018	701	1373	0.511	0.337994	1	2	0
SAMPLE_23730	691	1353	0.511	0.338063	1	2	0
SAMPLE_4782	545	1067	0.511	0.338089	1	2	0
SAMPLE_20127	516	1010	0.511	0.338139	1	2	0
SAMPLE_972	519	1015	0.511	0.338331	1	2	0
SAMPLE_2190	620	1212	0.512	0.338428	1	2	0
SAMPLE_17378	487	952	0.512	0.338429	1	2	0
SAMPLE_19745	634	1239	0.512	0.338494	1	2	0
SAMPLE_670	1193	2331	0.512	0.338536	1	2	0
SAMPLE_33604	563	1100	0.512	0.338545	1	2	0
SAMPLE_33804	476	930	0.512	0.338549	1	2	0
SAMPLE_35553	745	1455	0.512	0.338636	1	2	0
SAMPLE_6651	494	964	0.512	0.33882	1	2	0
SAMPLE_19033	584	1139	0.513	0.338944	1	2	0
SAMPLE_34934	507	988	0.513	0.33913	1	2	1
SAMPLE_996	490	954	0.514	0.339335	1	2	0
SAMPLE_30209	526	1023	0.514	0.339574	1	2	0
SAMPLE_9882	574	1116	0.514	0.339645	1	2	0
SAMPLE_14922	759	1475	0.515	0.339749	1	2	0
SAMPLE_21553	522	1014	0.515	0.339844	1	2	1
SAMPLE_25929	480	932	0.515	0.339943	1	2	0
SAMPLE_29095	519	1006	0.516	0.340328	1	2	1
SAMPLE_32466	737	1428	0.516	0.340416	1	2	0
SAMPLE_41054	849	1645	0.516	0.340417	1	2	1
SAMPLE_10121	683	1323	0.516	0.340479	1	2	0
SAMPLE_8619	729	1412	0.516	0.340495	1	2	0
SAMPLE_29745	582	1127	0.516	0.34055	1	2	0
SAMPLE_30521	509	985	0.517	0.340696	1	2	1
SAMPLE_8395	689	1333	0.517	0.340752	1	2	0
SAMPLE_25354	699	1352	0.517	0.340809	1	2	0
SAMPLE_25490	893	1727	0.517	0.34084	1	2	0
SAMPLE_11196	507	980	0.517	0.340955	1	2	0
SAMPLE_24320	1352	2612	0.518	0.34107	1	2	1
SAMPLE_11598	542	1047	0.518	0.341095	1	2	0
SAMPLE_16120	477	921	0.518	0.341202	1	2	0
SAMPLE_31218	554	1069	0.518	0.341343	1	2	1
SAMPLE_41706	696	1343	0.518	0.341344	1	2	0
SAMPLE_5239	934	1802	0.518	0.341374	1	2	0
SAMPLE_28237	735	1417	0.519	0.341543	1	2	0
SAMPLE_12378	484	933	0.519	0.341567	1	2	0
SAMPLE_12984	530	1020	0.52	0.341935	1	2	0
SAMPLE_26205	673	1295	0.52	0.341972	1	2	0
SAMPLE_16518	420	808	0.52	0.34202	1	2	0
SAMPLE_10418	433	833	0.52	0.342022	1	2	0
SAMPLE_5488	692	1331	0.52	0.342066	1	2	0
SAMPLE_30966	482	927	0.52	0.342087	1	2	1
SAMPLE_5817	597	1147	0.52	0.342317	1	2	0
SAMPLE_20303	889	1708	0.52	0.342318	1	2	0
SAMPLE_4476	707	1358	0.521	0.342373	1	2	0
SAMPLE_39056	655	1258	0.521	0.342394	1	2	1
SAMPLE_18670	548	1052	0.521	0.3425	1	2	0
SAMPLE_32020	520	998	0.521	0.342556	1	2	0
SAMPLE_20616	911	1748	0.521	0.34261	1	2	0
SAMPLE_22520	784	1503	0.522	0.342807	1	2	0
SAMPLE_15714	636	1219	0.522	0.342857	1	2	0
SAMPLE_20287	533	1021	0.522	0.342986	1	2	0
SAMPLE_38333	619	1185	0.522	0.343126	1	2	0
SAMPLE_21824	1062	2033	0.522	0.343134	1	2	0
SAMPLE_36268	478	915	0.522	0.343144	1	2	0
SAMPLE_10948	703	1345	0.523	0.343262	1	2	0
SAMPLE_36169	516	987	0.523	0.343313	1	2	1
SAMPLE_11477	773	1478	0.523	0.343403	1	2	0
SAMPLE_6071	1148	2195	0.523	0.343404	1	2	0
SAMPLE_18074	669	1279	0.523	0.343429	1	2	0
SAMPLE_19035	559	1068	0.523	0.343577	1	2	0
SAMPLE_14728	747	1427	0.523	0.343606	1	2	0
SAMPLE_40955	1090	2082	0.524	0.343632	1	2	1
SAMPLE_2595	760	1451	0.524	0.343736	1	2	0
SAMPLE_21383	674	1286	0.524	0.343878	1	2	0
SAMPLE_21504	530	1011	0.524	0.343933	1	2	0
SAMPLE_25527	654	1247	0.524	0.344029	1	2	1
SAMPLE_28700	599	1142	0.525	0.344055	1	2	0
SAMPLE_7607	705	1344	0.525	0.34407	1	2	0
SAMPLE_4441	564	1075	0.525	0.344112	1	2	0
SAMPLE_40070	532	1014	0.525	0.344114	1	2	0
SAMPLE_39635	549	1046	0.525	0.344201	1	2	1
SAMPLE_4442	494	941	0.525	0.344251	1	2	0
SAMPLE_24922	618	1177	0.525	0.34429	1	2	0
SAMPLE_2188	641	1220	0.525	0.344438	1	2	0
SAMPLE_3974	674	1282	0.526	0.344581	1	2	0
SAMPLE_20512	1132	2153	0.526	0.344597	1	2	0
SAMPLE_3156	793	1508	0.526	0.344633	1	2	0
SAMPLE_14730	659	1253	0.526	0.344665	1	2	0
SAMPLE_16966	566	1076	0.526	0.344702	1	2	0
SAMPLE_20331	503	956	0.526	0.344757	1	2	0
SAMPLE_28477	646	1227	0.526	0.344901	1	2	1
SAMPLE_10014	704	1337	0.527	0.344929	1	2	0
SAMPLE_14826	706	1340	0.527	0.345064	1	2	0
SAMPLE_35088	483	916	0.527	0.345247	1	2	0
SAMPLE_24902	661	1253	0.528	0.34535	1	2	0
SAMPLE_40065	435	823	0.529	0.345787	1	2	0
SAMPLE_15279	594	1123	0.529	0.345952	1	2	0
SAMPLE_37912	501	947	0.529	0.345994	1	2	0
SAMPLE_36710	526	994	0.529	0.346053	1	2	0
SAMPLE_40003	506	955	0.53	0.346338	1	2	0
SAMPLE_24970	781	1474	0.53	0.346341	1	2	0
SAMPLE_6704	811	1529	0.53	0.346581	1	2	0
SAMPLE_32525	547	1031	0.531	0.346641	1	2	1
SAMPLE_25462	698	1315	0.531	0.346746	1	2	1
SAMPLE_4945	689	1298	0.531	0.346754	1	2	0
SAMPLE_14120	777	1463	0.531	0.346875	1	2	0
SAMPLE_12798	540	1015	0.532	0.347267	1	2	0
SAMPLE_7365	812	1526	0.532	0.347305	1	2	0
SAMPLE_40265	629	1182	0.532	0.347322	1	2	0
SAMPLE_27752	698	1311	0.532	0.347437	1	2	1
SAMPLE_10932	742	1393	0.533	0.347541	1	2	0
SAMPLE_14385	619	1162	0.533	0.347558	1	2	0
SAMPLE_16516	617	1158	0.533	0.347606	1	2	0
SAMPLE_29619	606	1136	0.533	0.347876	1	2	1
SAMPLE_20125	549	1029	0.534	0.347909	1	2	0
SAMPLE_29671	428	802	0.534	0.347967	1	2	0
SAMPLE_5069	665	1246	0.534	0.347985	1	2	0
SAMPLE_31386	777	1455	0.534	0.348118	1	2	0
SAMPLE_18041	556	1041	0.534	0.348153	1	2	0
SAMPLE_34985	560	1048	0.534	0.348259	1	2	0
SAMPLE_2916	544	1018	0.534	0.348271	1	2	0
SAMPLE_13753	683	1278	0.534	0.348292	1	2	0
SAMPLE_15499	601	1124	0.535	0.348406	1	2	0
SAMPLE_23265	546	1021	0.535	0.348437	1	2	1
SAMPLE_32352	759	1419	0.535	0.348485	1	2	0
SAMPLE_26273	710	1325	0.536	0.348894	1	2	0
SAMPLE_20492	1203	2244	0.536	0.348999	1	2	0
SAMPLE_36784	529	986	0.537	0.349175	1	2	0
SAMPLE_9655	671	1250	0.537	0.349297	1	2	0
SAMPLE_30995	422	786	0.537	0.349338	1	2	0
SAMPLE_14824	639	1190	0.537	0.349371	1	2	0
SAMPLE_21286	1088	2026	0.537	0.34939	1	2	1
SAMPLE_38680	464	863	0.538	0.349661	1	2	1
SAMPLE_8764	628	1168	0.538	0.349666	1	2	0
SAMPLE_2915	575	1069	0.538	0.349757	1	2	0
SAMPLE_34306	496	922	0.538	0.349788	1	2	0
SAMPLE_21563	483	897	0.538	0.35	1	2	1
SAMPLE_38436	629	1167	0.539	0.350223	1	2	0
SAMPLE_29391	580	1076	0.539	0.350242	1	2	0
SAMPLE_25199	1543	2862	0.539	0.350284	1	2	0
SAMPLE_6369	713	1321	0.54	0.350541	1	2	0
SAMPLE_28510	1266	2345	0.54	0.350595	1	2	1
SAMPLE_37588	577	1068	0.54	0.35076	1	2	1
SAMPLE_6004	723	1337	0.541	0.350971	1	2	0
SAMPLE_4869	790	1460	0.541	0.351111	1	2	0
SAMPLE_8912	670	1238	0.541	0.351153	1	2	0
SAMPLE_19178	587	1084	0.542	0.351287	1	2	0
SAMPLE_39349	521	962	0.542	0.351315	1	2	0
SAMPLE_35334	552	1018	0.542	0.351592	1	2	0
SAMPLE_12757	575	1060	0.542	0.351682	1	2	0
SAMPLE_31238	554	1021	0.543	0.351746	1	2	0
SAMPLE_32284	682	1256	0.543	0.351909	1	2	0
SAMPLE_31794	1039	1913	0.543	0.351965	1	2	0
SAMPLE_19031	603	1110	0.543	0.352014	1	2	0
SAMPLE_25873	590	1086	0.543	0.352029	1	2	0
SAMPLE_18814	508	935	0.543	0.352044	1	2	0
SAMPLE_23619	843	1551	0.544	0.35213	1	2	0
SAMPLE_272	578	1063	0.544	0.352224	1	2	0
SAMPLE_22839	705	1296	0.544	0.352324	1	2	1
SAMPLE_38900	572	1050	0.545	0.352651	1	2	0
SAMPLE_31790	790	1450	0.545	0.352679	1	2	0
SAMPLE_21411	723	1327	0.545	0.352683	1	2	0
SAMPLE_9385	613	1125	0.545	0.352704	1	2	0
SAMPLE_35657	568	1041	0.546	0.353014	1	2	0
SAMPLE_9835	513	940	0.546	0.353063	1	2	0
SAMPLE_4315	893	1636	0.546	0.353104	1	2	0
SAMPLE_37412	533	976	0.546	0.353214	1	2	0
SAMPLE_15278	543	994	0.546	0.353286	1	2	0
SAMPLE_35931	563	1028	0.548	0.353865	1	2	0
SAMPLE_20614	907	1656	0.548	0.353882	1	2	0
SAMPLE_38172	510	931	0.548	0.353921	1	2	0
SAMPLE_19597	756	1380	0.548	0.353933	1	2	0
SAMPLE_24611	787	1436	0.548	0.354026	1	2	0
SAMPLE_6987	546	996	0.548	0.354086	1	2	0
SAMPLE_15863	472	861	0.548	0.354089	1	2	0
SAMPLE_33047	664	1211	0.548	0.354133	1	2	0
SAMPLE_24978	697	1270	0.549	0.354347	1	2	0
SAMPLE_31107	510	929	0.549	0.354413	1	2	0
SAMPLE_24223	823	1499	0.549	0.354436	1	2	0
SAMPLE_13101	652	1184	0.551	0.35512	1	2	0
SAMPLE_40465	565	1024	0.552	0.35557	1	2	1
SAMPLE_20450	1153	2087	0.552	0.355864	1	2	0
SAMPLE_35053	589	1066	0.553	0.355891	1	2	0
SAMPLE_13184	557	1008	0.553	0.355911	1	2	0
SAMPLE_29189	609	1102	0.553	0.355932	1	2	0
SAMPLE_41429	908	1643	0.553	0.355939	1	2	0
SAMPLE_10163	612	1107	0.553	0.356021	1	2	0
SAMPLE_36262	408	738	0.553	0.356021	1	2	1
SAMPLE_4946	694	1255	0.553	0.35608	1	2	0
SAMPLE_31165	550	991	0.555	0.356911	1	2	0
SAMPLE_17775	465	836	0.556	0.357417	1	2	0
SAMPLE_40243	487	875	0.557	0.357562	1	2	0
SAMPLE_29494	663	1190	0.557	0.357798	1	2	1
SAMPLE_15839	705	1260	0.56	0.358779	1	2	0
SAMPLE_25174	943	1683	0.56	0.359101	1	2	0
SAMPLE_29984	534	953	0.56	0.359112	1	2	0
SAMPLE_29349	776	1380	0.562	0.359926	1	2	0
SAMPLE_18816	515	915	0.563	0.36014	1	2	0
SAMPLE_20733	786	1393	0.564	0.360716	1	2	0
SAMPLE_5696	637	1128	0.565	0.360907	1	2	0
SAMPLE_30430	474	839	0.565	0.361005	1	2	1
SAMPLE_3007	1487	2626	0.566	0.361537	1	2	0
SAMPLE_10219	716	1264	0.566	0.361616	1	2	0
SAMPLE_26080	737	1300	0.567	0.361807	1	2	0
SAMPLE_30706	541	954	0.567	0.361873	1	2	0
SAMPLE_17471	526	926	0.568	0.362259	1	2	0
SAMPLE_37551	540	950	0.568	0.362416	1	2	0
SAMPLE_2386	480	844	0.569	0.362538	1	2	0
SAMPLE_19553	575	1011	0.569	0.362547	1	2	0
SAMPLE_122	575	1011	0.569	0.362547	1	2	0
SAMPLE_39544	740	1300	0.569	0.362745	1	2	0
SAMPLE_35752	579	1016	0.57	0.363009	1	2	0
SAMPLE_38477	622	1091	0.57	0.363106	1	2	1
SAMPLE_35680	504	883	0.571	0.363374	1	2	0
SAMPLE_15862	549	961	0.571	0.363576	1	2	0
SAMPLE_18726	700	1225	0.571	0.363636	1	2	0
SAMPLE_33584	717	1254	0.572	0.363775	1	2	0
SAMPLE_27567	658	1148	0.573	0.364341	1	2	0
SAMPLE_17257	440	764	0.576	0.365449	2	3	0
SAMPLE_25877	730	1266	0.577	0.365731	2	3	0
SAMPLE_10126	1089	1888	0.577	0.365805	2	3	0
SAMPLE_30048	774	1333	0.581	0.367347	2	3	1
SAMPLE_28933	672	1157	0.581	0.367414	2	3	1
SAMPLE_12796	553	951	0.581	0.367686	2	3	0
SAMPLE_36367	503	865	0.582	0.36769	2	3	1
SAMPLE_19001	462	792	0.583	0.368421	2	3	0
SAMPLE_36499	569	975	0.584	0.368523	2	3	0
SAMPLE_27956	698	1194	0.585	0.368922	2	3	0
SAMPLE_22613	1256	2146	0.585	0.369195	2	3	0
SAMPLE_10220	640	1089	0.588	0.370156	2	3	0
SAMPLE_38396	631	1066	0.592	0.371833	2	3	0
SAMPLE_37619	526	885	0.594	0.372785	2	3	0
SAMPLE_21336	1828	3069	0.596	0.37329	2	3	0
SAMPLE_7393	952	1598	0.596	0.373333	2	3	0
SAMPLE_6447	833	1397	0.596	0.373543	2	3	0
SAMPLE_6445	881	1474	0.598	0.374098	2	3	0
SAMPLE_35340	1070	1790	0.598	0.374126	2	3	0
SAMPLE_27279	805	1346	0.598	0.374245	2	3	0
SAMPLE_27419	1058	1768	0.598	0.374381	2	3	0
SAMPLE_11436	583	973	0.599	0.374679	2	3	0
SAMPLE_30456	581	969	0.6	0.374839	2	3	0
SAMPLE_28470	660	1100	0.6	0.375	2	3	0
SAMPLE_16968	507	842	0.602	0.375834	2	3	0
SAMPLE_16602	914	1516	0.603	0.376132	2	3	0
SAMPLE_8165	1463	2423	0.604	0.37648	2	3	0
SAMPLE_5702	910	1507	0.604	0.3765	2	3	0
SAMPLE_22202	1405	2323	0.605	0.376878	2	3	0
SAMPLE_17040	594	981	0.606	0.377143	2	3	0
SAMPLE_9426	837	1380	0.607	0.377537	2	3	0
SAMPLE_35910	532	874	0.609	0.378378	2	3	0
SAMPLE_37329	685	1125	0.609	0.378453	2	3	0
SAMPLE_10541	1199	1969	0.609	0.378472	2	3	0
SAMPLE_20723	1364	2235	0.61	0.378994	2	3	0
SAMPLE_19811	919	1504	0.611	0.379282	2	3	0
SAMPLE_1140	847	1386	0.611	0.37931	2	3	0
SAMPLE_18830	836	1364	0.613	0.38	2	3	0
SAMPLE_12967	1091	1772	0.616	0.381069	2	3	0
SAMPLE_20391	1202	1951	0.616	0.381224	2	3	0
SAMPLE_6005	849	1378	0.616	0.38123	2	3	0
SAMPLE_10229	834	1353	0.616	0.381344	2	3	0
SAMPLE_10540	1228	1992	0.616	0.381366	2	3	0
SAMPLE_33825	886	1437	0.617	0.381403	2	3	0
SAMPLE_5400	1398	2265	0.617	0.381654	2	3	0
SAMPLE_12982	658	1066	0.617	0.381671	2	3	0
SAMPLE_6325	800	1295	0.618	0.381862	2	3	0
SAMPLE_22431	1307	2113	0.619	0.382164	2	3	0
SAMPLE_9083	1182	1910	0.619	0.382277	2	3	0
SAMPLE_7235	845	1360	0.621	0.38322	2	3	0
SAMPLE_37876	994	1599	0.622	0.38334	2	3	0
SAMPLE_24505	978	1572	0.622	0.383529	2	3	1
SAMPLE_3890	1346	2162	0.623	0.383694	2	3	0
SAMPLE_7330	1091	1751	0.623	0.383885	2	3	0
SAMPLE_28720	691	1109	0.623	0.383889	2	3	0
SAMPLE_16683	685	1099	0.623	0.383969	2	3	0
SAMPLE_11950	950	1522	0.624	0.384304	2	3	0
SAMPLE_32585	1156	1847	0.626	0.384948	2	3	0
SAMPLE_34223	901	1439	0.626	0.385043	2	3	1
SAMPLE_14202	999	1595	0.626	0.38512	2	3	0
SAMPLE_37413	610	973	0.627	0.385344	2	3	0
SAMPLE_40928	2161	3442	0.628	0.385686	2	3	0
SAMPLE_13474	1215	1935	0.628	0.385714	2	3	0
SAMPLE_36944	700	1114	0.628	0.385888	2	3	1
SAMPLE_25732	900	1430	0.629	0.386266	2	3	0
SAMPLE_39970	1100	1744	0.631	0.386779	2	3	0
SAMPLE_18724	563	891	0.632	0.387208	2	3	0
SAMPLE_36098	1016	1606	0.633	0.38749	2	3	0
SAMPLE_23005	1506	2373	0.635	0.388244	2	3	0
SAMPLE_25866	810	1274	0.636	0.388676	2	3	1
SAMPLE_16487	1037	1631	0.636	0.388681	2	3	0
SAMPLE_14986	1352	2125	0.636	0.388841	2	3	0
SAMPLE_20184	816	1282	0.637	0.388942	2	3	0
SAMPLE_40891	2266	3560	0.637	0.388946	2	3	0
SAMPLE_27652	927	1456	0.637	0.389005	2	3	1
SAMPLE_32639	1429	2243	0.637	0.389161	2	3	0
SAMPLE_1127	1396	2191	0.637	0.389183	2	3	0
SAMPLE_24054	1666	2612	0.638	0.389434	2	3	0
SAMPLE_14077	1283	2011	0.638	0.389496	2	3	0
SAMPLE_14200	1216	1905	0.638	0.389619	2	3	0
SAMPLE_10127	1125	1761	0.639	0.389813	2	3	0
SAMPLE_37115	855	1337	0.639	0.390055	2	3	0
SAMPLE_2506	1310	2048	0.64	0.390113	2	3	0
SAMPLE_19349	897	1402	0.64	0.39017	2	3	0
SAMPLE_41326	1924	3007	0.64	0.390185	2	3	0
SAMPLE_35309	1020	1594	0.64	0.390207	2	3	0
SAMPLE_28871	1414	2208	0.64	0.390392	2	3	0
SAMPLE_10818	831	1296	0.641	0.390691	2	3	0
SAMPLE_5742	1670	2595	0.644	0.391559	2	3	0
SAMPLE_41340	1372	2131	0.644	0.391664	2	3	0
SAMPLE_20385	765	1188	0.644	0.391705	2	3	0
SAMPLE_7331	1149	1784	0.644	0.391749	2	3	0
SAMPLE_381	1113	1727	0.644	0.391901	2	3	0
SAMPLE_11916	968	1502	0.644	0.391903	2	3	0
SAMPLE_26104	959	1488	0.644	0.391908	2	3	0
SAMPLE_13896	984	1525	0.645	0.392188	2	3	0
SAMPLE_1872	2044	3166	0.646	0.392322	2	3	0
SAMPLE_28611	1252	1939	0.646	0.392353	2	3	0
SAMPLE_12061	1002	1551	0.646	0.392479	2	3	0
SAMPLE_37166	1010	1563	0.646	0.392538	2	3	0
SAMPLE_8957	1228	1900	0.646	0.392583	2	3	0
SAMPLE_19826	913	1412	0.647	0.392688	2	3	0
SAMPLE_23801	1933	2989	0.647	0.392727	2	3	0
SAMPLE_17921	1114	1721	0.647	0.392945	2	3	0
SAMPLE_28024	735	1135	0.648	0.393048	2	3	0
SAMPLE_9296	1143	1764	0.648	0.393189	2	3	0
SAMPLE_40900	2637	4068	0.648	0.393289	2	3	0
SAMPLE_36510	814	1254	0.649	0.393617	2	3	0
SAMPLE_30378	1109	1707	0.65	0.393821	2	3	0
SAMPLE_27549	1154	1776	0.65	0.393857	2	3	1
SAMPLE_12968	1235	1900	0.65	0.393939	2	3	0
SAMPLE_27525	1089	1674	0.651	0.394137	2	3	0
SAMPLE_40844	1196	1838	0.651	0.394199	2	3	1
SAMPLE_20182	783	1203	0.651	0.39426	2	3	0
SAMPLE_27755	1330	2043	0.651	0.394308	2	3	1
SAMPLE_13831	1604	2461	0.652	0.394588	2	3	0
SAMPLE_11491	876	1344	0.652	0.394595	2	3	0
SAMPLE_31685	1371	2102	0.652	0.39476	2	3	0
SAMPLE_29787	1190	1824	0.652	0.394824	2	3	0
SAMPLE_19350	885	1355	0.653	0.395089	2	3	0
SAMPLE_11952	1744	2669	0.653	0.395196	2	3	0
SAMPLE_7395	844	1289	0.655	0.395687	2	3	0
SAMPLE_20318	776	1185	0.655	0.395716	2	3	0
SAMPLE_22858	1236	1887	0.655	0.395773	2	3	0
SAMPLE_7048	1236	1877	0.658	0.397045	2	3	0
SAMPLE_32535	1194	1813	0.659	0.397073	2	3	0
SAMPLE_7050	1196	1816	0.659	0.397078	2	3	0
SAMPLE_33987	919	1394	0.659	0.397319	2	3	0
SAMPLE_41349	1274	1930	0.66	0.397628	2	3	0
SAMPLE_10832	1424	2155	0.661	0.397877	2	3	0
SAMPLE_2211	1370	2072	0.661	0.398024	2	3	0
SAMPLE_2209	1117	1688	0.662	0.398217	2	3	0
SAMPLE_11203	1141	1724	0.662	0.398255	2	3	0
SAMPLE_22358	1404	2121	0.662	0.398298	2	3	0
SAMPLE_38486	1052	1589	0.662	0.398334	2	3	1
SAMPLE_13942	1380	2084	0.662	0.398383	2	3	0
SAMPLE_31619	1384	2090	0.662	0.398388	2	3	0
SAMPLE_25164	1168	1759	0.664	0.399043	2	3	0
SAMPLE_35312	773	1163	0.665	0.399277	2	3	0
SAMPLE_36064	1148	1726	0.665	0.399443	2	3	0
SAMPLE_6579	1467	2204	0.666	0.399619	2	3	0
SAMPLE_8141	891	1338	0.666	0.399731	2	3	0
SAMPLE_10816	744	1117	0.666	0.399785	2	3	0
SAMPLE_11505	927	1391	0.666	0.399914	2	3	0
SAMPLE_9576	1345	2014	0.668	0.400417	2	3	0
SAMPLE_9214	1146	1715	0.668	0.400559	2	3	1
SAMPLE_6327	1021	1526	0.669	0.400864	2	3	0
SAMPLE_20757	2070	3091	0.67	0.401085	2	3	0
SAMPLE_29208	1256	1875	0.67	0.40115	2	3	0
SAMPLE_11205	1113	1660	0.67	0.40137	2	3	0
SAMPLE_1138	1001	1492	0.671	0.401524	2	3	0
SAMPLE_3217	1896	2826	0.671	0.401525	2	3	0
SAMPLE_29218	792	1179	0.672	0.401826	2	3	0
SAMPLE_6577	1752	2608	0.672	0.401835	2	3	0
SAMPLE_13832	1422	2116	0.672	0.401922	2	3	0
SAMPLE_33917	1100	1636	0.672	0.402047	2	3	0
SAMPLE_3009	1965	2922	0.672	0.402087	2	3	0
SAMPLE_13475	1399	2078	0.673	0.402358	2	3	0
SAMPLE_12980	1689	2508	0.673	0.40243	2	3	0
SAMPLE_3218	946	1402	0.675	0.402896	2	3	0
SAMPLE_30717	915	1355	0.675	0.403084	2	3	0
SAMPLE_38055	1042	1543	0.675	0.403095	2	3	0
SAMPLE_14078	999	1479	0.675	0.403148	2	3	0
SAMPLE_12062	1278	1892	0.675	0.403155	2	3	0
SAMPLE_34639	1037	1535	0.676	0.403188	2	3	0
SAMPLE_13944	1349	1996	0.676	0.403288	2	3	0
SAMPLE_9295	1081	1598	0.676	0.403509	2	3	0
SAMPLE_28430	1246	1841	0.677	0.403628	2	3	1
SAMPLE_14988	1242	1834	0.677	0.403771	2	3	0
SAMPLE_39759	1315	1941	0.677	0.40387	2	3	0
SAMPLE_10964	1048	1544	0.679	0.404321	2	3	0
SAMPLE_40377	639	941	0.679	0.40443	2	3	0
SAMPLE_34027	1085	1597	0.679	0.404549	2	3	0
SAMPLE_20947	1450	2134	0.679	0.404576	2	3	0
SAMPLE_26761	1198	1763	0.68	0.404593	2	3	0
SAMPLE_32179	521	766	0.68	0.404817	2	3	0
SAMPLE_32754	1266	1861	0.68	0.404861	2	3	1
SAMPLE_2322	1197	1757	0.681	0.405213	2	3	0
SAMPLE_30804	1052	1540	0.683	0.405864	2	3	0
SAMPLE_26225	1438	2105	0.683	0.405871	2	3	0
SAMPLE_16110	1254	1835	0.683	0.405957	2	3	0
SAMPLE_21368	1098	1605	0.684	0.406215	2	3	0
SAMPLE_31869	943	1376	0.685	0.406641	2	3	0
SAMPLE_35690	1059	1545	0.685	0.406682	2	3	0
SAMPLE_39907	1251	1825	0.685	0.406697	2	3	0
SAMPLE_37603	1058	1542	0.686	0.406923	2	3	0
SAMPLE_31642	1430	2084	0.686	0.406944	2	3	0
SAMPLE_30367	1008	1469	0.686	0.406944	2	3	0
SAMPLE_16776	797	1161	0.686	0.407048	2	3	0
SAMPLE_34633	1008	1467	0.687	0.407273	2	3	0
SAMPLE_9574	1349	1962	0.688	0.40743	2	3	0
SAMPLE_34732	1231	1789	0.688	0.407616	2	3	0
SAMPLE_776	943	1368	0.689	0.408048	2	3	0
SAMPLE_20469	2052	2976	0.69	0.408115	2	3	0
SAMPLE_31142	885	1282	0.69	0.408399	2	3	1
SAMPLE_24606	990	1432	0.691	0.408753	2	3	0
SAMPLE_29173	1257	1818	0.691	0.40878	2	3	1
SAMPLE_11493	912	1319	0.691	0.408785	2	3	0
SAMPLE_39085	1023	1477	0.693	0.4092	2	3	0
SAMPLE_768	1258	1816	0.693	0.409239	2	3	0
SAMPLE_18951	934	1347	0.693	0.40947	2	3	0
SAMPLE_27662	1176	1694	0.694	0.409756	2	3	0
SAMPLE_28295	886	1275	0.695	0.409995	2	3	0
SAMPLE_10228	1000	1438	0.695	0.410172	2	3	0
SAMPLE_41356	980	1407	0.697	0.410557	2	3	0
SAMPLE_5398	1470	2109	0.697	0.410729	2	3	0
SAMPLE_39959	1152	1651	0.698	0.410988	2	3	0
SAMPLE_40335	848	1215	0.698	0.411052	2	3	0
SAMPLE_28910	1144	1639	0.698	0.411067	2	3	0
SAMPLE_766	1211	1734	0.698	0.411205	2	3	0
SAMPLE_24020	919	1315	0.699	0.41137	2	3	0
SAMPLE_10665	1264	1808	0.699	0.411458	2	3	0
SAMPLE_40221	1195	1709	0.699	0.411501	2	3	0
SAMPLE_6874	1029	1470	0.7	0.411765	2	3	0
SAMPLE_38357	795	1135	0.7	0.411917	2	3	0
SAMPLE_32693	1549	2211	0.701	0.411968	2	3	0
SAMPLE_19348	1184	1690	0.701	0.411969	2	3	0
SAMPLE_36087	1073	1530	0.701	0.412217	2	3	0
SAMPLE_32550	1342	1913	0.702	0.412289	2	3	0
SAMPLE_5506	1260	1796	0.702	0.412304	2	3	0
SAMPLE_41257	929	1324	0.702	0.412339	2	3	0
SAMPLE_5885	1439	2049	0.702	0.412557	2	3	0
SAMPLE_4815	1502	2134	0.704	0.413091	2	3	0
SAMPLE_24831	1337	1898	0.704	0.413292	2	3	0
SAMPLE_8698	890	1262	0.705	0.413569	2	3	0
SAMPLE_17920	997	1412	0.706	0.413865	2	3	0
SAMPLE_688	1050	1482	0.709	0.414692	2	3	0
SAMPLE_30053	889	1254	0.709	0.414839	2	3	1
SAMPLE_35486	977	1378	0.709	0.414862	2	3	0
SAMPLE_5701	1270	1791	0.709	0.414897	2	3	0
SAMPLE_775	1018	1434	0.71	0.415171	2	3	0
SAMPLE_4598	1904	2666	0.714	0.41663	2	3	0
SAMPLE_27102	1065	1491	0.714	0.416667	2	3	0
SAMPLE_28928	997	1395	0.715	0.416806	2	3	0
SAMPLE_40333	1089	1523	0.715	0.416922	2	3	0
SAMPLE_36979	851	1190	0.715	0.416952	2	3	0
SAMPLE_8786	1089	1522	0.716	0.417082	2	3	0
SAMPLE_13418	1548	2163	0.716	0.417138	2	3	0
SAMPLE_9215	1209	1689	0.716	0.417184	2	3	0
SAMPLE_35957	1046	1460	0.716	0.417398	2	3	1
SAMPLE_34616	938	1308	0.717	0.417631	2	3	0
SAMPLE_31003	822	1146	0.717	0.417683	2	3	0
SAMPLE_27529	990	1380	0.717	0.417722	2	3	0
SAMPLE_2507	1570	2188	0.718	0.417775	2	3	0
SAMPLE_7743	1141	1590	0.718	0.417796	2	3	0
SAMPLE_7535	984	1370	0.718	0.418012	2	3	0
SAMPLE_24799	1086	1512	0.718	0.418014	2	3	0
SAMPLE_15615	1045	1454	0.719	0.418167	2	3	0
SAMPLE_17058	783	1089	0.719	0.418269	2	3	0
SAMPLE_21780	880	1222	0.72	0.418649	2	3	0
SAMPLE_24538	1290	1791	0.72	0.418695	2	3	0
SAMPLE_27612	861	1195	0.721	0.418774	2	3	0
SAMPLE_35691	1070	1485	0.721	0.418787	2	3	0
SAMPLE_28458	947	1314	0.721	0.418841	2	3	0
SAMPLE_39750	1040	1443	0.721	0.418848	2	3	0
SAMPLE_38736	836	1157	0.723	0.419468	2	3	0
SAMPLE_32394	1379	1908	0.723	0.419531	2	3	0
SAMPLE_6876	1033	1428	0.723	0.419748	2	3	0
SAMPLE_36597	1107	1530	0.724	0.419795	2	3	0
SAMPLE_34144	998	1378	0.724	0.420034	2	3	0
SAMPLE_34591	888	1225	0.725	0.420256	2	3	0
SAMPLE_40686	931	1283	0.726	0.420506	2	3	0
SAMPLE_9457	1021	1407	0.726	0.420511	2	3	0
SAMPLE_21158	1181	1624	0.727	0.421034	2	3	0
SAMPLE_9818	1347	1851	0.728	0.421201	2	3	0
SAMPLE_25681	1037	1425	0.728	0.421202	2	3	0
SAMPLE_16108	1203	1653	0.728	0.421218	2	3	0
SAMPLE_26754	853	1172	0.728	0.421235	2	3	0
SAMPLE_20317	802	1101	0.728	0.42144	2	3	0
SAMPLE_28464	1133	1554	0.729	0.42166	2	3	0
SAMPLE_24637	1223	1677	0.729	0.421724	2	3	0
SAMPLE_20586	1507	2065	0.73	0.421892	2	3	0
SAMPLE_689	962	1316	0.731	0.4223	2	3	0
SAMPLE_32112	1090	1491	0.731	0.422317	2	3	0
SAMPLE_37772	782	1069	0.732	0.422474	2	3	0
SAMPLE_26299	1227	1671	0.734	0.423395	2	3	0
SAMPLE_34214	1120	1524	0.735	0.423601	2	3	0
SAMPLE_40939	1671	2273	0.735	0.423682	2	3	0
SAMPLE_33960	740	1005	0.736	0.424069	2	3	0
SAMPLE_17205	814	1105	0.737	0.424179	2	3	0
SAMPLE_5507	1218	1652	0.737	0.42439	2	3	0
SAMPLE_36356	688	933	0.737	0.424429	2	3	0
SAMPLE_32573	1360	1841	0.739	0.424867	2	3	1
SAMPLE_18585	1146	1548	0.74	0.42539	2	3	0
SAMPLE_26763	1238	1670	0.741	0.425722	2	3	0
SAMPLE_26350	1048	1413	0.742	0.425843	2	3	0
SAMPLE_41523	1426	1922	0.742	0.425926	2	3	0
SAMPLE_21843	1449	1952	0.742	0.426051	2	3	0
SAMPLE_8969	1041	1401	0.743	0.42629	2	3	0
SAMPLE_17285	959	1290	0.743	0.426412	2	3	0
SAMPLE_30034	858	1152	0.745	0.426866	2	3	0
SAMPLE_21946	962	1291	0.745	0.426986	2	3	0
SAMPLE_18296	1083	1451	0.746	0.427388	2	3	0
SAMPLE_39812	1045	1399	0.747	0.427578	2	3	0
SAMPLE_36266	803	1075	0.747	0.427583	2	3	0
SAMPLE_40308	871	1166	0.747	0.42759	2	3	0
SAMPLE_35313	928	1239	0.749	0.428242	2	3	0
SAMPLE_39976	989	1320	0.749	0.428324	2	3	0
SAMPLE_18295	922	1229	0.75	0.428638	2	3	0
SAMPLE_15233	879	1170	0.751	0.42899	2	3	0
SAMPLE_10307	1154	1536	0.751	0.428996	2	3	0
SAMPLE_36111	994	1323	0.751	0.429003	2	3	0
SAMPLE_18266	792	1053	0.752	0.429268	2	3	0
SAMPLE_31793	1052	1397	0.753	0.429563	2	3	0
SAMPLE_25724	957	1270	0.754	0.429726	2	3	1
SAMPLE_38427	762	1011	0.754	0.42978	2	3	0
SAMPLE_33778	970	1285	0.755	0.430155	2	3	0
SAMPLE_41418	1667	2207	0.755	0.430305	2	3	0
SAMPLE_22769	1182	1563	0.756	0.430601	2	3	0
SAMPLE_17213	881	1164	0.757	0.430807	2	3	0
SAMPLE_25039	628	829	0.758	0.431023	2	3	1
SAMPLE_15259	846	1116	0.758	0.431193	2	3	0
SAMPLE_29160	1089	1435	0.759	0.431458	2	3	0
SAMPLE_41592	1420	1870	0.759	0.431611	2	3	0
SAMPLE_34817	746	982	0.76	0.431713	2	3	0
SAMPLE_41306	1288	1695	0.76	0.43178	2	3	0
SAMPLE_33397	976	1284	0.76	0.431858	2	3	0
SAMPLE_22959	1255	1651	0.76	0.431865	2	3	0
SAMPLE_28022	765	1006	0.76	0.431959	2	3	0
SAMPLE_11011	994	1307	0.761	0.431986	2	3	0
SAMPLE_6556	1234	1622	0.761	0.432073	2	3	0
SAMPLE_25907	846	1112	0.761	0.432074	2	3	0
SAMPLE_11258	784	1030	0.761	0.432194	2	3	0
SAMPLE_41225	1646	2162	0.761	0.432248	2	3	0
SAMPLE_41734	1556	2043	0.762	0.432342	2	3	0
SAMPLE_20673	1329	1744	0.762	0.432476	2	3	0
SAMPLE_34206	898	1178	0.762	0.432563	2	3	0
SAMPLE_27539	1126	1477	0.762	0.432578	2	3	0
SAMPLE_35687	672	881	0.763	0.432711	2	3	0
SAMPLE_35108	845	1107	0.763	0.432889	2	3	0
SAMPLE_40665	784	1026	0.764	0.433149	2	3	0
SAMPLE_38697	818	1070	0.764	0.433263	2	3	0
SAMPLE_33587	844	1104	0.764	0.433265	2	3	0
SAMPLE_26586	982	1283	0.765	0.433554	2	3	0
SAMPLE_25942	788	1029	0.766	0.433682	2	3	0
SAMPLE_32933	1086	1416	0.767	0.434053	2	3	0
SAMPLE_33173	929	1210	0.768	0.434315	2	3	1
SAMPLE_360	1733	2256	0.768	0.434445	2	3	0
SAMPLE_17446	977	1271	0.769	0.434609	2	3	0
SAMPLE_38280	1047	1362	0.769	0.43462	2	3	0
SAMPLE_10659	881	1146	0.769	0.434632	2	3	0
SAMPLE_36051	843	1096	0.769	0.43476	2	3	0
SAMPLE_39841	1041	1353	0.769	0.434837	2	3	0
SAMPLE_8968	1004	1304	0.77	0.435009	2	3	0
SAMPLE_24736	1123	1458	0.77	0.435103	2	3	0
SAMPLE_30567	857	1112	0.771	0.435246	2	3	1
SAMPLE_33446	835	1083	0.771	0.435349	2	3	0
SAMPLE_25292	1299	1684	0.771	0.435468	2	3	0
SAMPLE_3082	1217	1577	0.772	0.435576	2	3	0
SAMPLE_40649	930	1204	0.772	0.435801	2	3	0
SAMPLE_6659	1270	1644	0.773	0.435827	2	3	0
SAMPLE_34139	973	1259	0.773	0.435932	2	3	0
SAMPLE_33863	977	1264	0.773	0.435966	2	3	0
SAMPLE_6645	1086	1403	0.774	0.43632	2	3	0
SAMPLE_24944	1040	1343	0.774	0.436425	2	3	0
SAMPLE_34054	807	1042	0.774	0.436452	2	3	0
SAMPLE_40442	1003	1295	0.775	0.436466	2	3	0
SAMPLE_26157	1221	1576	0.775	0.436539	2	3	0
SAMPLE_34380	752	969	0.776	0.436955	2	3	0
SAMPLE_34886	872	1123	0.776	0.437093	2	3	0
SAMPLE_38557	853	1098	0.777	0.437212	2	3	0
SAMPLE_24454	1339	1723	0.777	0.437296	2	3	0
SAMPLE_41510	1517	1952	0.777	0.437302	2	3	0
SAMPLE_18532	998	1284	0.777	0.437336	2	3	0
SAMPLE_37515	852	1095	0.778	0.437596	2	3	0
SAMPLE_28409	1116	1434	0.778	0.437647	2	3	0
SAMPLE_185	1506	1933	0.779	0.437918	2	3	0
SAMPLE_40105	858	1100	0.78	0.438202	2	3	0
SAMPLE_26493	1282	1643	0.78	0.438291	2	3	0
SAMPLE_38246	831	1065	0.78	0.438291	2	3	0
SAMPLE_25944	917	1175	0.78	0.438337	2	3	0
SAMPLE_22219	1262	1617	0.78	0.438347	2	3	0
SAMPLE_12053	1159	1485	0.78	0.438351	2	3	0
SAMPLE_35052	1041	1332	0.782	0.438685	2	3	0
SAMPLE_38034	845	1081	0.782	0.438733	2	3	1
SAMPLE_10686	1154	1476	0.782	0.438783	2	3	0
SAMPLE_34968	939	1201	0.782	0.438785	2	3	0
SAMPLE_36507	859	1098	0.782	0.438937	2	3	0
SAMPLE_11819	764	976	0.783	0.43908	2	3	0
SAMPLE_24614	1222	1561	0.783	0.439095	2	3	0
SAMPLE_747	1197	1529	0.783	0.439105	2	3	0
SAMPLE_40811	1558	1990	0.783	0.439121	2	3	0
SAMPLE_9802	1061	1355	0.783	0.439156	2	3	0
SAMPLE_34292	834	1065	0.783	0.439179	2	3	0
SAMPLE_39009	943	1204	0.783	0.439218	2	3	0
SAMPLE_28350	1042	1330	0.783	0.439292	2	3	0
SAMPLE_4379	1715	2183	0.786	0.439969	2	3	0
SAMPLE_31143	763	971	0.786	0.440023	2	3	0
SAMPLE_8034	1070	1361	0.786	0.440148	2	3	0
SAMPLE_36965	884	1124	0.786	0.440239	2	3	0
SAMPLE_25323	1072	1363	0.787	0.440246	2	3	0
SAMPLE_32263	834	1060	0.787	0.440338	2	3	0
SAMPLE_1698	991	1259	0.787	0.440444	2	3	0
SAMPLE_2586	1269	1612	0.787	0.440472	2	3	0
SAMPLE_41687	1418	1801	0.787	0.440509	2	3	0
SAMPLE_39091	975	1238	0.788	0.440578	2	3	0
SAMPLE_36401	789	1001	0.788	0.440782	2	3	0
SAMPLE_20925	1569	1990	0.788	0.440854	2	3	0
SAMPLE_38216	850	1078	0.788	0.440871	2	3	0
SAMPLE_39780	921	1168	0.789	0.440881	2	3	0
SAMPLE_26221	1054	1336	0.789	0.441004	2	3	0
SAMPLE_1696	1213	1537	0.789	0.441091	2	3	0
SAMPLE_9738	1232	1561	0.789	0.441103	2	3	0
SAMPLE_19179	703	890	0.79	0.441306	2	3	0
SAMPLE_39837	1019	1290	0.79	0.441317	2	3	0
SAMPLE_35331	879	1112	0.79	0.441487	2	3	0
SAMPLE_16872	1057	1337	0.791	0.44152	2	3	0
SAMPLE_39654	1087	1374	0.791	0.44169	2	3	0
SAMPLE_17633	781	987	0.791	0.441742	2	3	0
SAMPLE_9009	1148	1450	0.792	0.441878	2	3	0
SAMPLE_34079	921	1163	0.792	0.441939	2	3	0
SAMPLE_20833	1667	2105	0.792	0.441941	2	3	0
SAMPLE_41702	1408	1777	0.792	0.442072	2	3	0
SAMPLE_18826	848	1070	0.793	0.442127	2	3	0
SAMPLE_5816	967	1220	0.793	0.442158	2	3	0
SAMPLE_36246	841	1061	0.793	0.442166	2	3	0
SAMPLE_28107	1067	1346	0.793	0.442188	2	3	0
SAMPLE_3039	1017	1282	0.793	0.442366	2	3	0
SAMPLE_19558	787	992	0.793	0.442383	2	3	0
SAMPLE_27115	776	978	0.793	0.442417	2	3	0
SAMPLE_30752	911	1148	0.794	0.442448	2	3	0
SAMPLE_17316	870	1096	0.794	0.442523	2	3	0
SAMPLE_24631	1205	1518	0.794	0.442527	2	3	0
SAMPLE_5686	901	1135	0.794	0.442534	2	3	0
SAMPLE_23441	1479	1863	0.794	0.442549	2	3	0
SAMPLE_32094	971	1223	0.794	0.442571	2	3	0
SAMPLE_19825	1303	1641	0.794	0.442595	2	3	0
SAMPLE_36483	845	1064	0.794	0.44264	2	3	0
SAMPLE_33589	1046	1317	0.794	0.442658	2	3	0
SAMPLE_25824	1021	1285	0.795	0.442758	2	3	0
SAMPLE_18047	879	1106	0.795	0.442821	2	3	0
SAMPLE_17447	868	1092	0.795	0.442857	2	3	0
SAMPLE_28884	818	1029	0.795	0.44288	2	3	0
SAMPLE_26109	1229	1546	0.795	0.442883	2	3	0
SAMPLE_39488	954	1200	0.795	0.442897	2	3	0
SAMPLE_2552	776	976	0.795	0.442922	2	3	0
SAMPLE_3383	1269	1596	0.795	0.442932	2	3	0
SAMPLE_25266	1123	1412	0.795	0.442998	2	3	0
SAMPLE_27507	1062	1335	0.796	0.443054	2	3	0
SAMPLE_17067	1056	1327	0.796	0.443139	2	3	0
SAMPLE_3872	1234	1550	0.796	0.443247	2	3	0
SAMPLE_9736	1152	1447	0.796	0.443247	2	3	0
SAMPLE_15492	942	1183	0.796	0.443294	2	3	0
SAMPLE_19127	906	1137	0.797	0.443465	2	3	0
SAMPLE_27915	895	1123	0.797	0.443508	2	3	0
SAMPLE_41710	1304	1636	0.797	0.443537	2	3	0
SAMPLE_6969	975	1223	0.797	0.443585	2	3	0
SAMPLE_1333	864	1083	0.798	0.44376	2	3	0
SAMPLE_22714	1117	1400	0.798	0.443782	2	3	0
SAMPLE_21342	1051	1317	0.798	0.443834	2	3	0
SAMPLE_32231	866	1085	0.798	0.443875	2	3	0
SAMPLE_9925	922	1155	0.798	0.443909	2	3	0
SAMPLE_34284	1017	1274	0.798	0.443911	2	3	0
SAMPLE_16870	1168	1463	0.798	0.443938	2	3	0
SAMPLE_12455	699	875	0.799	0.444091	2	3	0
SAMPLE_25429	1665	2084	0.799	0.444118	2	3	0
SAMPLE_17103	831	1040	0.799	0.444148	2	3	0
SAMPLE_40802	863	1080	0.799	0.444159	2	3	0
SAMPLE_7975	1178	1473	0.8	0.444361	2	3	0
SAMPLE_19008	843	1054	0.8	0.444386	2	3	0
SAMPLE_35041	878	1097	0.8	0.444557	2	3	0
SAMPLE_34604	839	1048	0.801	0.444621	2	3	0
SAMPLE_40617	1114	1391	0.801	0.444711	2	3	0
SAMPLE_25786	1091	1362	0.801	0.444762	2	3	1
SAMPLE_14799	1096	1368	0.801	0.444805	2	3	0
SAMPLE_31050	853	1064	0.802	0.444966	2	3	0
SAMPLE_21147	989	1233	0.802	0.445095	2	3	0
SAMPLE_19406	888	1107	0.802	0.445113	2	3	0
SAMPLE_22009	1006	1254	0.802	0.445133	2	3	0
SAMPLE_37508	885	1103	0.802	0.445171	2	3	0
SAMPLE_2687	1301	1621	0.803	0.445243	2	3	0
SAMPLE_28279	1098	1368	0.803	0.445255	2	3	0
SAMPLE_5852	800	996	0.803	0.445434	2	3	0
SAMPLE_41179	1262	1571	0.803	0.445464	2	3	0
SAMPLE_10306	1161	1445	0.803	0.44551	2	3	0
SAMPLE_10499	1190	1481	0.804	0.445526	2	3	0
SAMPLE_41091	1559	1940	0.804	0.445556	2	3	0
SAMPLE_18152	856	1065	0.804	0.445601	2	3	0
SAMPLE_20991	963	1198	0.804	0.445627	2	3	0
SAMPLE_40059	1017	1265	0.804	0.445662	2	3	0
SAMPLE_1927	1252	1557	0.804	0.44571	2	3	0
SAMPLE_36750	879	1093	0.804	0.44574	2	3	0
SAMPLE_35385	953	1185	0.804	0.445744	2	3	0
SAMPLE_25166	1147	1426	0.804	0.445783	2	3	0
SAMPLE_11423	917	1140	0.804	0.445795	2	3	0
SAMPLE_7242	1176	1461	0.805	0.445961	2	3	0
SAMPLE_38069	958	1190	0.805	0.445996	2	3	0
SAMPLE_22285	1132	1406	0.805	0.44602	2	3	0
SAMPLE_17263	852	1058	0.805	0.446073	2	3	0
SAMPLE_39279	1016	1261	0.806	0.446201	2	3	1
SAMPLE_40544	1066	1323	0.806	0.446212	2	3	0
SAMPLE_8615	1457	1808	0.806	0.446248	2	3	0
SAMPLE_20834	1034	1283	0.806	0.446267	2	3	0
SAMPLE_25576	1218	1510	0.807	0.446481	2	3	0
SAMPLE_23216	1757	2178	0.807	0.446506	2	3	0
SAMPLE_22351	1034	1281	0.807	0.446652	2	3	0
SAMPLE_40452	876	1085	0.807	0.446711	2	3	0
SAMPLE_32404	1182	1464	0.807	0.446712	2	3	0
SAMPLE_28012	1024	1268	0.808	0.446771	2	3	0
SAMPLE_30846	785	972	0.808	0.446784	2	3	0
SAMPLE_19583	840	1040	0.808	0.446809	2	3	0
SAMPLE_428	1656	2050	0.808	0.446843	2	3	0
SAMPLE_12433	808	1000	0.808	0.446903	2	3	0
SAMPLE_38456	1208	1495	0.808	0.446911	2	3	0
SAMPLE_27785	1200	1485	0.808	0.446927	2	3	0
SAMPLE_31225	851	1053	0.808	0.446954	2	3	0
SAMPLE_17591	861	1065	0.808	0.44704	2	3	0
SAMPLE_15596	836	1034	0.809	0.447059	2	3	0
SAMPLE_21304	1712	2117	0.809	0.447114	2	3	0
SAMPLE_34876	892	1103	0.809	0.447118	2	3	0
SAMPLE_33819	905	1119	0.809	0.447134	2	3	0
SAMPLE_22255	1113	1376	0.809	0.447168	2	3	1
SAMPLE_27454	936	1157	0.809	0.447205	2	3	1
SAMPLE_25287	1310	1619	0.809	0.447252	2	3	1
SAMPLE_28971	1141	1410	0.809	0.447276	2	3	0
SAMPLE_23039	1638	2024	0.809	0.447297	2	3	0
SAMPLE_41623	1689	2087	0.809	0.447299	2	3	0
SAMPLE_17862	1068	1319	0.81	0.447424	2	3	0
SAMPLE_698	1485	1834	0.81	0.447424	2	3	0
SAMPLE_8700	979	1209	0.81	0.447441	2	3	0
SAMPLE_2392	1246	1538	0.81	0.447557	2	3	0
SAMPLE_35465	769	949	0.81	0.447614	2	3	0
SAMPLE_4354	1373	1694	0.811	0.447669	2	3	0
SAMPLE_19232	860	1061	0.811	0.447683	2	3	0
SAMPLE_29884	775	956	0.811	0.447718	2	3	1
SAMPLE_41195	1385	1708	0.811	0.447785	2	3	0
SAMPLE_10149	1120	1381	0.811	0.447821	2	3	0
SAMPLE_3102	1314	1620	0.811	0.447853	2	3	0
SAMPLE_39124	919	1133	0.811	0.447856	2	3	0
SAMPLE_3516	1230	1516	0.811	0.447924	2	3	0
SAMPLE_23484	1321	1628	0.811	0.447948	2	3	0
SAMPLE_2941	1304	1607	0.811	0.447956	2	3	0
SAMPLE_26169	1134	1397	0.812	0.448044	2	3	0
SAMPLE_23163	1182	1456	0.812	0.448067	2	3	0
SAMPLE_15045	604	744	0.812	0.448071	2	3	0
SAMPLE_27397	1020	1256	0.812	0.448155	2	3	0
SAMPLE_32919	926	1140	0.812	0.448209	2	3	1
SAMPLE_37852	938	1154	0.813	0.448375	2	3	1
SAMPLE_32328	995	1224	0.813	0.4484	2	3	0
SAMPLE_31030	400	492	0.813	0.44843	2	3	0
SAMPLE_26397	961	1182	0.813	0.448437	2	3	0
SAMPLE_19128	879	1081	0.813	0.448469	2	3	0
SAMPLE_18678	916	1126	0.813	0.44858	2	3	0
SAMPLE_40226	948	1165	0.814	0.448651	2	3	0
SAMPLE_1913	931	1144	0.814	0.448675	2	3	0
SAMPLE_29552	927	1139	0.814	0.448693	2	3	0
SAMPLE_23674	1330	1634	0.814	0.448718	2	3	0
SAMPLE_22832	1278	1570	0.814	0.448736	2	3	0
SAMPLE_41059	1532	1882	0.814	0.44874	2	3	0
SAMPLE_7346	1020	1253	0.814	0.448746	2	3	0
SAMPLE_12391	946	1162	0.814	0.448767	2	3	0
SAMPLE_18753	820	1007	0.814	0.448823	2	3	0
SAMPLE_33673	658	808	0.814	0.44884	2	3	1
SAMPLE_21886	1580	1940	0.814	0.448864	2	3	0
SAMPLE_29723	1071	1314	0.815	0.449057	2	3	1
SAMPLE_38403	1049	1287	0.815	0.449058	2	3	0
SAMPLE_40701	935	1147	0.815	0.449087	2	3	0
SAMPLE_20879	1584	1943	0.815	0.449107	2	3	0
SAMPLE_22630	1219	1495	0.815	0.449153	2	3	1
SAMPLE_28805	1109	1360	0.815	0.44917	2	3	0
SAMPLE_11174	999	1225	0.816	0.449191	2	3	0
SAMPLE_38665	933	1144	0.816	0.449206	2	3	0
SAMPLE_12879	790	968	0.816	0.449374	2	3	0
SAMPLE_9942	814	997	0.816	0.449475	2	3	0
SAMPLE_37673	841	1030	0.817	0.449492	2	3	0
SAMPLE_41595	1727	2115	0.817	0.449505	2	3	0
SAMPLE_31532	1082	1325	0.817	0.449522	2	3	0
SAMPLE_15352	923	1130	0.817	0.449586	2	3	0
SAMPLE_12435	825	1010	0.817	0.449591	2	3	0
SAMPLE_31963	1055	1291	0.817	0.449702	2	3	0
SAMPLE_34417	899	1100	0.817	0.449725	2	3	1
SAMPLE_22398	1265	1547	0.818	0.449858	2	3	0
SAMPLE_2159	1095	1339	0.818	0.449877	2	3	0
SAMPLE_4985	1351	1652	0.818	0.449883	2	3	0
SAMPLE_24754	1984	2425	0.818	0.449989	2	3	1
SAMPLE_3717	1062	1298	0.818	0.45	2	2	0
SAMPLE_25565	1364	1667	0.818	0.450016	2	2	0
SAMPLE_29005	1067	1304	0.818	0.450021	2	2	0
SAMPLE_15430	955	1167	0.818	0.450047	2	2	0
SAMPLE_2630	1127	1377	0.818	0.45008	2	2	0
SAMPLE_22430	1079	1318	0.819	0.450146	2	2	0
SAMPLE_23411	1224	1495	0.819	0.450166	2	2	0
SAMPLE_27028	813	993	0.819	0.450166	2	2	0
SAMPLE_12414	787	961	0.819	0.450229	2	2	0
SAMPLE_18438	932	1138	0.819	0.450242	2	2	0
SAMPLE_30541	884	1079	0.819	0.450331	2	2	1
SAMPLE_38448	880	1074	0.819	0.450358	2	2	0
SAMPLE_4236	1244	1518	0.819	0.450398	2	2	0
SAMPLE_2374	1269	1548	0.82	0.450479	2	2	0
SAMPLE_10215	1033	1260	0.82	0.450502	2	2	0
SAMPLE_6769	1102	1344	0.82	0.450531	2	2	0
SAMPLE_4216	1378	1680	0.82	0.450621	2	2	0
SAMPLE_29759	959	1168	0.821	0.45087	2	2	0
SAMPLE_36066	886	1079	0.821	0.450891	2	2	1
SAMPLE_18828	1001	1219	0.821	0.450901	2	2	0
SAMPLE_37220	865	1053	0.821	0.450991	2	2	1
SAMPLE_4247	1817	2211	0.822	0.451092	2	2	0
SAMPLE_18534	863	1050	0.822	0.451124	2	2	0
SAMPLE_34808	915	1113	0.822	0.451183	2	2	1
SAMPLE_12635	869	1057	0.822	0.451194	2	2	0
SAMPLE_12412	935	1137	0.822	0.451255	2	2	0
SAMPLE_3261	1325	1611	0.822	0.451294	2	2	0
SAMPLE_89	1025	1246	0.823	0.451343	2	2	0
SAMPLE_26574	1206	1466	0.823	0.451347	2	2	0
SAMPLE_37785	775	942	0.823	0.451369	2	2	0
SAMPLE_6783	1504	1828	0.823	0.451381	2	2	0
SAMPLE_4179	1491	1812	0.823	0.451408	2	2	0
SAMPLE_3664	1440	1750	0.823	0.451411	2	2	0
SAMPLE_7476	1060	1288	0.823	0.451448	2	2	0
SAMPLE_36258	940	1142	0.823	0.451489	2	2	0
SAMPLE_9458	1145	1391	0.823	0.451498	2	2	0
SAMPLE_41152	1631	1981	0.823	0.45155	2	2	1
SAMPLE_3503	1292	1569	0.823	0.45159	2	2	0
SAMPLE_13087	1363	1655	0.824	0.451624	2	2	0
SAMPLE_40748	996	1209	0.824	0.451701	2	2	0
SAMPLE_1314	1194	1449	0.824	0.451759	2	2	0
SAMPLE_2195	1422	1725	0.824	0.451859	2	2	0
SAMPLE_23142	1739	2109	0.825	0.451923	2	2	0
SAMPLE_25981	1124	1363	0.825	0.45195	2	2	0
SAMPLE_38293	1191	1444	0.825	0.451992	2	2	0
SAMPLE_29441	777	942	0.825	0.452007	2	2	1
SAMPLE_31854	1041	1262	0.825	0.452019	2	2	0
SAMPLE_22873	1136	1377	0.825	0.452049	2	2	0
SAMPLE_11083	1243	1506	0.825	0.452164	2	2	0
SAMPLE_3875	1126	1364	0.826	0.452209	2	2	0
SAMPLE_1361	1032	1250	0.826	0.452235	2	2	0
SAMPLE_37459	838	1015	0.826	0.45224	2	2	0
SAMPLE_14184	1236	1497	0.826	0.45225	2	2	0
SAMPLE_9049	1085	1314	0.826	0.452272	2	2	0
SAMPLE_22154	1256	1521	0.826	0.452287	2	2	0
SAMPLE_3715	1195	1447	0.826	0.452309	2	2	0
SAMPLE_5321	1068	1293	0.826	0.452351	2	2	0
SAMPLE_15436	941	1139	0.826	0.452404	2	2	0
SAMPLE_23289	1507	1824	0.826	0.452417	2	2	0
SAMPLE_4234	1503	1819	0.826	0.452438	2	2	1
SAMPLE_1057	1313	1589	0.826	0.452447	2	2	0
SAMPLE_39584	1033	1250	0.826	0.452475	2	2	0
SAMPLE_999	1381	1671	0.826	0.45249	2	2	0
SAMPLE_17265	901	1090	0.827	0.452536	2	2	0
SAMPLE_16591	954	1154	0.827	0.452562	2	2	0
SAMPLE_5320	1312	1587	0.827	0.45257	2	2	0
SAMPLE_28674	1064	1287	0.827	0.452573	2	2	0
SAMPLE_18627	821	993	0.827	0.452591	2	2	0
SAMPLE_3897	1281	1549	0.827	0.45265	2	2	0
SAMPLE_3042	875	1058	0.827	0.452664	2	2	0
SAMPLE_12596	789	954	0.827	0.452668	2	2	0
SAMPLE_17168	1087	1314	0.827	0.452728	2	2	0
SAMPLE_22267	1001	1210	0.827	0.452736	2	2	1
SAMPLE_17989	1006	1216	0.827	0.452745	2	2	0
SAMPLE_17214	863	1043	0.827	0.452781	2	2	0
SAMPLE_14692	1444	1745	0.828	0.452807	2	2	0
SAMPLE_12131	905	1093	0.828	0.452953	2	2	0
SAMPLE_21202	1219	1472	0.828	0.452991	2	2	0
SAMPLE_3486	1442	1741	0.828	0.453032	2	2	0
SAMPLE_22378	1071	1293	0.828	0.453046	2	2	0
SAMPLE_416	1125	1358	0.828	0.453081	2	2	0
SAMPLE_21809	1106	1335	0.828	0.453093	2	2	1
SAMPLE_23973	1174	1417	0.829	0.453107	2	2	0
SAMPLE_22498	1388	1675	0.829	0.453151	2	2	0
SAMPLE_879	1272	1535	0.829	0.453153	2	2	0
SAMPLE_35121	964	1163	0.829	0.45322	2	2	0
SAMPLE_3043	1330	1604	0.829	0.453306	2	2	0
SAMPLE_29221	1040	1254	0.829	0.453357	2	2	0
SAMPLE_36693	953	1149	0.829	0.453378	2	2	0
SAMPLE_36540	832	1003	0.83	0.453406	2	2	1
SAMPLE_17189	905	1091	0.83	0.453407	2	2	0
SAMPLE_6263	1091	1315	0.83	0.45345	2	2	0
SAMPLE_12366	984	1186	0.83	0.453456	2	2	0
SAMPLE_22577	1218	1468	0.83	0.453462	2	2	0
SAMPLE_36327	931	1122	0.83	0.453483	2	2	0
SAMPLE_34033	917	1105	0.83	0.453511	2	2	0
SAMPLE_22845	1278	1540	0.83	0.453513	2	2	0
SAMPLE_32752	1244	1499	0.83	0.453518	2	2	0
SAMPLE_36699	893	1076	0.83	0.45353	2	2	0
SAMPLE_21909	1167	1406	0.83	0.453556	2	2	0
SAMPLE_17699	821	989	0.83	0.453591	2	2	0
SAMPLE_4155	1663	2003	0.83	0.453628	2	2	0
SAMPLE_8581	1009	1215	0.83	0.453687	2	2	0
SAMPLE_3561	1230	1481	0.831	0.453707	2	2	0
SAMPLE_21716	1457	1754	0.831	0.453753	2	2	0
SAMPLE_5121	1050	1264	0.831	0.45376	2	2	0
SAMPLE_12454	893	1075	0.831	0.45376	2	2	1
SAMPLE_27151	1080	1300	0.831	0.453782	2	2	0
SAMPLE_2037	1297	1561	0.831	0.453814	2	2	0
SAMPLE_26393	1130	1360	0.831	0.453815	2	2	0
SAMPLE_189	1140	1372	0.831	0.453822	2	2	0
SAMPLE_23708	993	1195	0.831	0.453839	2	2	0
SAMPLE_6068	993	1195	0.831	0.453839	2	2	0
SAMPLE_40329	885	1065	0.831	0.453846	2	2	0
SAMPLE_27435	1382	1663	0.831	0.453859	2	2	0
SAMPLE_37557	827	995	0.831	0.453897	2	2	0
SAMPLE_38318	837	1007	0.831	0.453905	2	2	0
SAMPLE_23068	1251	1505	0.831	0.453919	2	2	1
SAMPLE_19175	1094	1316	0.831	0.453942	2	2	0
SAMPLE_22635	761	915	0.832	0.454057	2	2	1
SAMPLE_13539	1018	1224	0.832	0.454059	2	2	0
SAMPLE_22792	1236	1486	0.832	0.454078	2	2	0
SAMPLE_31732	1068	1284	0.832	0.454082	2	2	0
SAMPLE_20053	1098	1320	0.832	0.454094	2	2	0
SAMPLE_7211	1103	1326	0.832	0.454096	2	2	0
SAMPLE_7762	1202	1445	0.832	0.454099	2	2	1
SAMPLE_40832	1128	1356	0.832	0.454106	2	2	0
SAMPLE_40593	960	1154	0.832	0.454115	2	2	0
SAMPLE_18322	980	1178	0.832	0.454124	2	2	0
SAMPLE_1335	941	1131	0.832	0.454151	2	2	0
SAMPLE_2931	1339	1609	0.832	0.454206	2	2	0
SAMPLE_15969	784	942	0.832	0.454229	2	2	0
SAMPLE_25066	1038	1247	0.832	0.454267	2	2	0
SAMPLE_34957	1158	1391	0.832	0.454296	2	2	0
SAMPLE_11750	994	1194	0.832	0.454296	2	2	0
SAMPLE_28994	1049	1260	0.833	0.454309	2	2	0
SAMPLE_11289	756	908	0.833	0.454327	2	2	0
SAMPLE_1136	816	980	0.833	0.454343	2	2	0
SAMPLE_17994	947	1137	0.833	0.454415	2	2	0
SAMPLE_23073	1268	1522	0.833	0.45448	2	2	0
SAMPLE_17535	729	875	0.833	0.454489	2	2	0
SAMPLE_8708	1139	1367	0.833	0.454509	2	2	0
SAMPLE_32370	1257	1508	0.834	0.454611	2	2	0
SAMPLE_27595	1112	1334	0.834	0.45462	2	2	1
SAMPLE_3786	1097	1316	0.834	0.454621	2	2	0
SAMPLE_40323	837	1004	0.834	0.454644	2	2	0
SAMPLE_12339	1128	1353	0.834	0.454655	2	2	0
SAMPLE_28736	1083	1299	0.834	0.45466	2	2	0
SAMPLE_2689	1254	1504	0.834	0.454677	2	2	0
SAMPLE_25484	1395	1673	0.834	0.454694	2	2	0
SAMPLE_30739	884	1060	0.834	0.454733	2	2	0
SAMPLE_18625	814	976	0.834	0.454749	2	2	0
SAMPLE_40220	940	1127	0.834	0.454765	2	2	0
SAMPLE_39347	1101	1320	0.834	0.454771	2	2	0
SAMPLE_4063	1323	1586	0.834	0.454795	2	2	0
SAMPLE_19548	876	1050	0.834	0.454829	2	2	0
SAMPLE_35146	948	1136	0.835	0.454894	2	2	0
SAMPLE_2583	1286	1541	0.835	0.454899	2	2	0
SAMPLE_37369	913	1094	0.835	0.454908	2	2	0
SAMPLE_3990	1428	1711	0.835	0.454922	2	2	0
SAMPLE_2693	1242	1488	0.835	0.454945	2	2	0
SAMPLE_1630	1288	1543	0.835	0.454963	2	2	0
SAMPLE_3856	1269	1520	0.835	0.455002	2	2	0
SAMPLE_22547	1234	1478	0.835	0.455015	2	2	0
SAMPLE_2479	931	1115	0.835	0.455034	2	2	0
SAMPLE_5722	1200	1437	0.835	0.455063	2	2	0
SAMPLE_17632	932	1116	0.835	0.455078	2	2	0
SAMPLE_38454	847	1014	0.835	0.455132	2	2	0
SAMPLE_22036	1040	1245	0.835	0.455142	2	2	1
SAMPLE_1081	1408	1685	0.836	0.455221	2	2	0
SAMPLE_28689	1022	1223	0.836	0.455234	2	2	0
SAMPLE_22551	1318	1577	0.836	0.455268	2	2	0
SAMPLE_2287	1314	1572	0.836	0.455301	2	2	0
SAMPLE_4335	1687	2018	0.836	0.455331	2	2	0
SAMPLE_13537	1208	1445	0.836	0.455334	2	2	0
SAMPLE_28351	1235	1477	0.836	0.455383	2	2	0
SAMPLE_38638	960	1148	0.836	0.455408	2	2	0
SAMPLE_27099	1105	1321	0.836	0.455482	2	2	0
SAMPLE_21955	1489	1780	0.837	0.455491	2	2	0
SAMPLE_4374	1439	1720	0.837	0.455524	2	2	0
SAMPLE_38856	876	1047	0.837	0.455538	2	2	1
SAMPLE_13750	960	1147	0.837	0.455624	2	2	0
SAMPLE_6241	961	1148	0.837	0.455666	2	2	0
SAMPLE_20562	1805	2156	0.837	0.455693	2	2	0
SAMPLE_27523	978	1168	0.837	0.455732	2	2	0
SAMPLE_28456	1078	1287	0.838	0.455814	2	2	0
SAMPLE_6242	1068	1275	0.838	0.455826	2	2	0
SAMPLE_14999	1228	1466	0.838	0.455828	2	2	0
SAMPLE_22178	1146	1368	0.838	0.455847	2	2	0
SAMPLE_33758	981	1171	0.838	0.455855	2	2	0
SAMPLE_12586	838	1000	0.838	0.45593	2	2	0
SAMPLE_769	1144	1365	0.838	0.455959	2	2	0
SAMPLE_23042	1491	1779	0.838	0.455963	2	2	1
SAMPLE_2579	1243	1483	0.838	0.455979	2	2	0
SAMPLE_20062	803	958	0.838	0.455991	2	2	0
SAMPLE_6765	1151	1373	0.838	0.456022	2	2	0
SAMPLE_22239	1048	1250	0.838	0.456049	2	2	0
SAMPLE_29922	794	947	0.838	0.45606	2	2	0
SAMPLE_2469	1267	1511	0.839	0.456084	2	2	0
SAMPLE_29094	992	1183	0.839	0.456092	2	2	0
SAMPLE_906	956	1140	0.839	0.456107	2	2	0
SAMPLE_31254	1112	1326	0.839	0.456112	2	2	0
SAMPLE_10436	951	1134	0.839	0.456115	2	2	0
SAMPLE_4152	1398	1667	0.839	0.456117	2	2	0
SAMPLE_36557	931	1110	0.839	0.456149	2	2	0
SAMPLE_2060	1509	1799	0.839	0.456167	2	2	0
SAMPLE_22562	1317	1570	0.839	0.456183	2	2	0
SAMPLE_4306	1666	1986	0.839	0.456188	2	2	0
SAMPLE_34177	907	1081	0.839	0.456237	2	2	0
SAMPLE_7412	1142	1361	0.839	0.456252	2	2	0
SAMPLE_1637	1617	1927	0.839	0.456264	2	2	0
SAMPLE_2474	1086	1294	0.839	0.456303	2	2	0
SAMPLE_9252	1180	1406	0.839	0.456303	2	2	0
SAMPLE_41406	1505	1793	0.839	0.456337	2	2	0
SAMPLE_4909	1401	1669	0.839	0.456352	2	2	0
SAMPLE_22652	1590	1894	0.839	0.456372	2	2	0
SAMPLE_11904	769	916	0.84	0.45638	2	2	0
SAMPLE_21088	1225	1459	0.84	0.456408	2	2	0
SAMPLE_38298	901	1073	0.84	0.456434	2	2	0
SAMPLE_17718	943	1123	0.84	0.456438	2	2	0
SAMPLE_567	1447	1723	0.84	0.456467	2	2	0
SAMPLE_1233	797	949	0.84	0.456472	2	2	0
SAMPLE_24419	1421	1692	0.84	0.456473	2	2	0
SAMPLE_1989	1862	2217	0.84	0.456484	2	2	0
SAMPLE_41522	1511	1799	0.84	0.456495	2	2	0
SAMPLE_36980	877	1044	0.84	0.456533	2	2	0
SAMPLE_3227	1371	1632	0.84	0.456543	2	2	0
SAMPLE_16320	932	1109	0.84	0.456639	2	2	0
SAMPLE_28679	1106	1316	0.84	0.456647	2	2	1
SAMPLE_15336	843	1003	0.84	0.456663	2	2	0
SAMPLE_12349	901	1072	0.84	0.456665	2	2	0
SAMPLE_3869	1497	1781	0.841	0.456681	2	2	0
SAMPLE_8583	1118	1330	0.841	0.456699	2	2	0
SAMPLE_23597	1277	1519	0.841	0.456724	2	2	0
SAMPLE_33457	892	1061	0.841	0.456733	2	2	0
SAMPLE_3259	1267	1507	0.841	0.456741	2	2	0
SAMPLE_11063	755	898	0.841	0.456745	2	2	0
SAMPLE_17647	835	993	0.841	0.456783	2	2	0
SAMPLE_30393	1094	1301	0.841	0.456785	2	2	0
SAMPLE_34259	899	1069	0.841	0.456809	2	2	0
SAMPLE_12849	878	1044	0.841	0.456816	2	2	0
SAMPLE_24036	1340	1593	0.841	0.45687	2	2	0
SAMPLE_37733	1155	1373	0.841	0.456883	2	2	0
SAMPLE_34725	912	1084	0.841	0.456914	2	2	0
SAMPLE_35795	1103	1311	0.841	0.456918	2	2	0
SAMPLE_24127	1151	1368	0.841	0.456927	2	2	1
SAMPLE_36603	902	1072	0.841	0.45694	2	2	1
SAMPLE_4222	1688	2006	0.841	0.456957	2	2	0
SAMPLE_23048	1386	1647	0.842	0.456973	2	2	1
SAMPLE_3390	1217	1446	0.842	0.457003	2	2	0
SAMPLE_33164	1133	1346	0.842	0.457039	2	2	0
SAMPLE_25218	1479	1757	0.842	0.457046	2	2	0
SAMPLE_33971	889	1056	0.842	0.457069	2	2	0
SAMPLE_2132	1081	1284	0.842	0.457082	2	2	0
SAMPLE_39295	1129	1341	0.842	0.457085	2	2	0
SAMPLE_40687	975	1158	0.842	0.457103	2	2	0
SAMPLE_23947	1029	1222	0.842	0.45713	2	2	0
SAMPLE_21365	1248	1482	0.842	0.457143	2	2	0
SAMPLE_22392	1270	1508	0.842	0.457163	2	2	0
SAMPLE_29470	998	1185	0.842	0.457169	2	2	0
SAMPLE_22980	1377	1635	0.842	0.457171	2	2	1
SAMPLE_21719	1329	1578	0.842	0.457172	2	2	0
SAMPLE_24265	1484	1762	0.842	0.457178	2	2	0
SAMPLE_25852	1228	1458	0.842	0.457185	2	2	0
SAMPLE_22238	1485	1763	0.842	0.457204	2	2	0
SAMPLE_5652	1245	1478	0.842	0.457216	2	2	0
SAMPLE_24182	1557	1848	0.843	0.457269	2	2	0
SAMPLE_15742	899	1067	0.843	0.457274	2	2	0
SAMPLE_16682	1001	1188	0.843	0.457286	2	2	0
SAMPLE_231	1200	1424	0.843	0.457317	2	2	0
SAMPLE_239	1452	1723	0.843	0.457323	2	2	0
SAMPLE_37045	853	1012	0.843	0.457373	2	2	0
SAMPLE_1488	1068	1267	0.843	0.457388	2	2	0
SAMPLE_41673	1283	1522	0.843	0.457398	2	2	0
SAMPLE_31505	1247	1479	0.843	0.457447	2	2	0
SAMPLE_39116	1054	1250	0.843	0.457465	2	2	0
SAMPLE_41242	1323	1569	0.843	0.457469	2	2	1
SAMPLE_10464	915	1085	0.843	0.4575	2	2	0
SAMPLE_5351	1475	1749	0.843	0.457506	2	2	0
SAMPLE_26678	1131	1341	0.843	0.457524	2	2	0
SAMPLE_27331	991	1175	0.843	0.457525	2	2	0
SAMPLE_15948	792	939	0.843	0.457539	2	2	0
SAMPLE_15158	1009	1196	0.844	0.457596	2	2	0
SAMPLE_22835	1144	1356	0.844	0.4576	2	2	0
SAMPLE_2468	1339	1587	0.844	0.457621	2	2	0
SAMPLE_25	1291	1530	0.844	0.457639	2	2	0
SAMPLE_19648	1032	1223	0.844	0.45765	2	2	0
SAMPLE_3100	1427	1691	0.844	0.457665	2	2	0
SAMPLE_4841	1373	1627	0.844	0.457667	2	2	0
SAMPLE_5408	1438	1704	0.844	0.45767	2	2	0
SAMPLE_23632	1168	1384	0.844	0.45768	2	2	0
SAMPLE_21267	1450	1718	0.844	0.457702	2	2	0
SAMPLE_36984	817	968	0.844	0.457703	2	2	0
SAMPLE_22899	1202	1424	0.844	0.45773	2	2	0
SAMPLE_38099	894	1059	0.844	0.457757	2	2	0
SAMPLE_4085	1442	1708	0.844	0.457778	2	2	0
SAMPLE_19022	1036	1227	0.844	0.457799	2	2	0
SAMPLE_12800	841	996	0.844	0.457812	2	2	0
SAMPLE_31545	1168	1383	0.845	0.45786	2	2	0
SAMPLE_1535	2827	3347	0.845	0.457888	2	2	0
SAMPLE_1334	980	1160	0.845	0.457944	2	2	0
SAMPLE_22670	1405	1663	0.845	0.457953	2	2	0
SAMPLE_3130	1416	1676	0.845	0.457956	2	2	0
SAMPLE_5775	1271	1504	0.845	0.458018	2	2	0
SAMPLE_22259	1031	1220	0.845	0.458019	2	2	0
SAMPLE_22940	1293	1530	0.845	0.458023	2	2	0
SAMPLE_2495	1266	1498	0.845	0.458032	2	2	0
SAMPLE_23346	1780	2106	0.845	0.458055	2	2	0
SAMPLE_26500	1045	1236	0.845	0.458132	2	2	0
SAMPLE_3815	1297	1534	0.846	0.458142	2	2	0
SAMPLE_36925	865	1023	0.846	0.458157	2	2	0
SAMPLE_35346	932	1102	0.846	0.45821	2	2	0
SAMPLE_4112	1250	1478	0.846	0.458211	2	2	0
SAMPLE_3027	1174	1388	0.846	0.458236	2	2	0
SAMPLE_4399	1506	1780	0.846	0.458308	2	2	0
SAMPLE_18461	929	1098	0.846	0.458313	2	2	0
SAMPLE_3626	1645	1944	0.846	0.458345	2	2	0
SAMPLE_35845	864	1021	0.846	0.458355	2	2	0
SAMPLE_3242	1387	1639	0.846	0.458361	2	2	0
SAMPLE_5530	914	1080	0.846	0.458375	2	2	0
SAMPLE_27352	1162	1373	0.846	0.458383	2	2	0
SAMPLE_31380	1450	1713	0.846	0.458426	2	2	0
SAMPLE_2178	1087	1284	0.847	0.458456	2	2	0
SAMPLE_21024	1176	1389	0.847	0.45848	2	2	1
SAMPLE_23957	1199	1416	0.847	0.458509	2	2	0
SAMPLE_32706	1481	1749	0.847	0.458514	2	2	0
SAMPLE_4616	1879	2219	0.847	0.458516	2	2	0
SAMPLE_38677	896	1058	0.847	0.458547	2	2	0
SAMPLE_19559	963	1137	0.847	0.458571	2	2	0
SAMPLE_5393	1594	1882	0.847	0.458573	2	2	0
SAMPLE_4755	930	1098	0.847	0.45858	2	2	0
SAMPLE_24118	836	987	0.847	0.458585	2	2	0
SAMPLE_36196	886	1046	0.847	0.458592	2	2	0
SAMPLE_26178	1263	1491	0.847	0.458606	2	2	0
SAMPLE_32216	809	955	0.847	0.458617	2	2	0
SAMPLE_22415	1042	1230	0.847	0.458627	2	2	1
SAMPLE_3510	1297	1531	0.847	0.458628	2	2	0
SAMPLE_3241	1176	1388	0.847	0.458658	2	2	0
SAMPLE_25954	1143	1349	0.847	0.458668	2	2	0
SAMPLE_2865	1399	1651	0.847	0.458689	2	2	0
SAMPLE_9040	1116	1317	0.847	0.458693	2	2	0
SAMPLE_22376	1322	1560	0.847	0.458709	2	2	0
SAMPLE_26562	1150	1357	0.847	0.458716	2	2	1
SAMPLE_11355	939	1108	0.847	0.45872	2	2	0
SAMPLE_33689	967	1141	0.848	0.458729	2	2	0
SAMPLE_19506	1068	1260	0.848	0.458763	2	2	0
SAMPLE_1144	1442	1701	0.848	0.458797	2	2	0
SAMPLE_33315	1394	1644	0.848	0.458855	2	2	0
SAMPLE_4212	1400	1651	0.848	0.458866	2	2	0
SAMPLE_21686	1523	1796	0.848	0.458873	2	2	0
SAMPLE_4459	1568	1849	0.848	0.458882	2	2	0
SAMPLE_37208	960	1132	0.848	0.458891	2	2	0
SAMPLE_5600	1385	1633	0.848	0.458913	2	2	0
SAMPLE_27054	1134	1337	0.848	0.458924	2	2	0
SAMPLE_38941	972	1146	0.848	0.458924	2	2	0
SAMPLE_34231	978	1153	0.848	0.458939	2	2	0
SAMPLE_2725	1476	1740	0.848	0.458955	2	2	0
SAMPLE_37351	861	1015	0.848	0.458955	2	2	0
SAMPLE_17937	962	1134	0.848	0.458969	2	2	0
SAMPLE_13850	1460	1721	0.848	0.458975	2	2	0
SAMPLE_2961	1186	1398	0.848	0.458978	2	2	0
SAMPLE_22308	1270	1497	0.848	0.458981	2	2	0
SAMPLE_22853	1494	1761	0.848	0.458986	2	2	1
SAMPLE_4128	1371	1616	0.848	0.458989	2	2	0
SAMPLE_24596	1540	1815	0.848	0.459016	2	2	0
SAMPLE_20377	969	1142	0.849	0.459024	2	2	0
SAMPLE_33134	947	1116	0.849	0.45904	2	2	0
SAMPLE_4539	1329	1566	0.849	0.459067	2	2	0
SAMPLE_22212	1689	1990	0.849	0.459092	2	2	0
SAMPLE_27365	1022	1204	0.849	0.459119	2	2	1
SAMPLE_23456	1848	2177	0.849	0.45913	2	2	0
SAMPLE_32041	1180	1390	0.849	0.459144	2	2	1
SAMPLE_4256	1248	1470	0.849	0.459161	2	2	0
SAMPLE_15906	866	1020	0.849	0.459173	2	2	0
SAMPLE_2970	1424	1677	0.849	0.459207	2	2	0
SAMPLE_22949	1548	1823	0.849	0.459211	2	2	0
SAMPLE_1213	1098	1293	0.849	0.459222	2	2	0
SAMPLE_12010	1132	1333	0.849	0.459229	2	2	0
SAMPLE_37284	918	1081	0.849	0.45923	2	2	0
SAMPLE_39946	845	995	0.849	0.459239	2	2	0
SAMPLE_23668	1037	1221	0.849	0.459256	2	2	1
SAMPLE_36538	778	916	0.849	0.459268	2	2	0
SAMPLE_3154	1388	1634	0.849	0.459298	2	2	0
SAMPLE_23175	1959	2306	0.85	0.45932	2	2	1
SAMPLE_3760	1632	1921	0.85	0.45933	2	2	0
SAMPLE_22798	1288	1516	0.85	0.459344	2	2	0
SAMPLE_28369	983	1157	0.85	0.459346	2	2	0
SAMPLE_22812	1340	1577	0.85	0.459376	2	2	1
SAMPLE_24573	1063	1251	0.85	0.459378	2	2	0
SAMPLE_2736	1312	1544	0.85	0.459384	2	2	0
SAMPLE_36012	741	872	0.85	0.459392	2	2	0
SAMPLE_33172	1149	1352	0.85	0.459416	2	2	1
SAMPLE_37949	1166	1372	0.85	0.459417	2	2	0
SAMPLE_19710	934	1099	0.85	0.45942	2	2	0
SAMPLE_36800	985	1159	0.85	0.459422	2	2	0
SAMPLE_18265	793	933	0.85	0.459444	2	2	0
SAMPLE_39788	1014	1193	0.85	0.459447	2	2	0
SAMPLE_20703	1054	1240	0.85	0.459459	2	2	0
SAMPLE_247	1134	1334	0.85	0.459481	2	2	0
SAMPLE_27875	1032	1214	0.85	0.459484	2	2	0
SAMPLE_3658	1900	2235	0.85	0.459492	2	2	0
SAMPLE_22822	1288	1515	0.85	0.459508	2	2	0
SAMPLE_40060	976	1148	0.85	0.45951	2	2	0
SAMPLE_14898	1186	1395	0.85	0.459512	2	2	0
SAMPLE_1917	1606	1889	0.85	0.459514	2	2	0
SAMPLE_22243	1175	1382	0.85	0.459523	2	2	1
SAMPLE_7298	1056	1242	0.85	0.45953	2	2	0
SAMPLE_15029	954	1122	0.85	0.459538	2	2	0
SAMPLE_4130	1187	1396	0.85	0.459543	2	2	0
SAMPLE_802	1102	1296	0.85	0.45955	2	2	0
SAMPLE_2231	1159	1363	0.85	0.459556	2	2	0
SAMPLE_1381	1159	1363	0.85	0.459556	2	2	0
SAMPLE_21595	1557	1831	0.85	0.459563	2	2	0
SAMPLE_3504	1649	1939	0.85	0.459588	2	2	0
SAMPLE_3819	1667	1960	0.851	0.459608	2	2	0
SAMPLE_28986	1269	1492	0.851	0.459616	2	2	0
SAMPLE_14121	1304	1533	0.851	0.45964	2	2	0
SAMPLE_22728	1299	1527	0.851	0.45966	2	2	0
SAMPLE_33525	912	1072	0.851	0.459677	2	2	0
SAMPLE_2686	1277	1501	0.851	0.459683	2	2	0
SAMPLE_4420	1416	1664	0.851	0.45974	2	2	0
SAMPLE_2436	1479	1738	0.851	0.459745	2	2	0
SAMPLE_668	1337	1571	0.851	0.459766	2	2	0
SAMPLE_28153	966	1135	0.851	0.459781	2	2	0
SAMPLE_38921	1092	1283	0.851	0.459789	2	2	0
SAMPLE_4330	1425	1674	0.851	0.459826	2	2	0
SAMPLE_31864	916	1076	0.851	0.459839	2	2	0
SAMPLE_5394	1231	1446	0.851	0.459843	2	2	0
SAMPLE_3063	1294	1520	0.851	0.459844	2	2	0
SAMPLE_4224	1810	2126	0.851	0.459858	2	2	0
SAMPLE_31301	1014	1191	0.851	0.459864	2	2	0
SAMPLE_22755	997	1171	0.851	0.459871	2	2	1
SAMPLE_6763	1358	1595	0.851	0.459871	2	2	0
SAMPLE_1393	992	1165	0.852	0.459898	2	2	0
SAMPLE_2158	1222	1435	0.852	0.459917	2	2	0
SAMPLE_30433	1004	1179	0.852	0.459918	2	2	1
SAMPLE_9051	1096	1287	0.852	0.459924	2	2	0
SAMPLE_5525	1010	1186	0.852	0.459927	2	2	0
SAMPLE_21323	1274	1496	0.852	0.459928	2	2	0
SAMPLE_25566	1385	1626	0.852	0.45998	2	2	0
SAMPLE_1899	1564	1836	0.852	0.46	2	2	0
SAMPLE_25533	949	1114	0.852	0.46001	2	2	0
SAMPLE_30668	823	966	0.852	0.460034	2	2	0
SAMPLE_23101	1623	1905	0.852	0.460034	2	2	0
SAMPLE_22644	1226	1439	0.852	0.460038	2	2	0
SAMPLE_12630	898	1054	0.852	0.460041	2	2	0
SAMPLE_1984	1451	1703	0.852	0.460051	2	2	0
SAMPLE_20291	1071	1257	0.852	0.460052	2	2	0
SAMPLE_19774	812	953	0.852	0.460057	2	2	0
SAMPLE_22848	1290	1514	0.852	0.460057	2	2	0
SAMPLE_2550	1446	1697	0.852	0.46007	2	2	0
SAMPLE_22012	1423	1670	0.852	0.460071	2	2	0
SAMPLE_3642	1683	1975	0.852	0.460087	2	2	0
SAMPLE_16287	830	974	0.852	0.460089	2	2	0
SAMPLE_32364	1343	1576	0.852	0.460089	2	2	0
SAMPLE_22964	1084	1272	0.852	0.460102	2	2	0
SAMPLE_160	1407	1651	0.852	0.460105	2	2	0
SAMPLE_3891	1615	1895	0.852	0.460114	2	2	0
SAMPLE_116	1726	2025	0.852	0.460144	2	2	0
SAMPLE_2864	1559	1829	0.852	0.460153	2	2	0
SAMPLE_16027	936	1098	0.852	0.460177	2	2	0
SAMPLE_15800	890	1044	0.852	0.460186	2	2	0
SAMPLE_25112	1244	1459	0.853	0.460229	2	2	0
SAMPLE_7976	1199	1406	0.853	0.460269	2	2	0
SAMPLE_27974	1014	1189	0.853	0.460281	2	2	1
SAMPLE_1766	1472	1726	0.853	0.460288	2	2	0
SAMPLE_20373	1078	1264	0.853	0.46029	2	2	0
SAMPLE_3116	1305	1530	0.853	0.460317	2	2	0
SAMPLE_1439	876	1027	0.853	0.460326	2	2	0
SAMPLE_3627	1294	1517	0.853	0.460334	2	2	0
SAMPLE_22603	1254	1470	0.853	0.460352	2	2	1
SAMPLE_3711	2000	2344	0.853	0.460405	2	2	0
SAMPLE_4742	2035	2385	0.853	0.460407	2	2	0
SAMPLE_26370	1385	1623	0.853	0.460439	2	2	0
SAMPLE_27169	1083	1269	0.853	0.460459	2	2	0
SAMPLE_37847	932	1092	0.853	0.460474	2	2	0
SAMPLE_28726	1066	1249	0.853	0.460475	2	2	0
SAMPLE_3195	1253	1468	0.854	0.460492	2	2	0
SAMPLE_40695	1003	1175	0.854	0.460514	2	2	0
SAMPLE_18692	904	1059	0.854	0.46052	2	2	0
SAMPLE_36790	904	1059	0.854	0.46052	2	2	0
SAMPLE_37873	939	1100	0.854	0.46052	2	2	0
SAMPLE_33614	939	1100	0.854	0.46052	2	2	0
SAMPLE_5909	1184	1387	0.854	0.460521	2	2	0
SAMPLE_2332	1758	2059	0.854	0.460571	2	2	0
SAMPLE_34612	958	1122	0.854	0.460577	2	2	0
SAMPLE_9579	1186	1389	0.854	0.460583	2	2	0
SAMPLE_14998	1187	1390	0.854	0.460613	2	2	0
SAMPLE_717	1804	2112	0.854	0.460674	2	2	0
SAMPLE_3377	1242	1454	0.854	0.460682	2	2	0
SAMPLE_23382	1500	1756	0.854	0.460688	2	2	1
SAMPLE_24410	1313	1537	0.854	0.460702	2	2	0
SAMPLE_28730	1190	1393	0.854	0.460705	2	2	0
SAMPLE_22653	1501	1757	0.854	0.460712	2	2	0
SAMPLE_15335	1126	1318	0.854	0.46072	2	2	0
SAMPLE_3180	1162	1360	0.854	0.460745	2	2	0
SAMPLE_26033	1263	1478	0.855	0.460781	2	2	0
SAMPLE_37493	893	1045	0.855	0.460784	2	2	1
SAMPLE_1521	1058	1238	0.855	0.460801	2	2	0
SAMPLE_23910	1264	1479	0.855	0.460809	2	2	0
SAMPLE_27383	1147	1342	0.855	0.460828	2	2	0
SAMPLE_18108	812	950	0.855	0.46084	2	2	0
SAMPLE_3061	1495	1749	0.855	0.460851	2	2	0
SAMPLE_28974	1166	1364	0.855	0.46087	2	2	0
SAMPLE_37618	807	944	0.855	0.460879	2	2	0
SAMPLE_5313	1184	1385	0.855	0.46088	2	2	0
SAMPLE_7375	1184	1385	0.855	0.46088	2	2	0
SAMPLE_8142	1084	1268	0.855	0.460884	2	2	0
SAMPLE_5028	1456	1703	0.855	0.460905	2	2	0
SAMPLE_27521	1062	1242	0.855	0.460938	2	2	0
SAMPLE_35033	956	1118	0.855	0.460945	2	2	0
SAMPLE_17299	484	566	0.855	0.460952	2	2	0
SAMPLE_20136	1234	1443	0.855	0.460964	2	2	0
SAMPLE_37226	998	1167	0.855	0.46097	2	2	0
SAMPLE_24302	1329	1554	0.855	0.460978	2	2	0
SAMPLE_4858	1359	1589	0.855	0.460991	2	2	0
SAMPLE_23337	2039	2384	0.855	0.460999	2	2	0
SAMPLE_7722	1106	1293	0.855	0.461025	2	2	0
SAMPLE_32264	716	837	0.855	0.461043	2	2	0
SAMPLE_20370	1006	1176	0.855	0.461045	2	2	0
SAMPLE_15157	941	1100	0.855	0.461049	2	2	0
SAMPLE_23558	1315	1537	0.856	0.46108	2	2	0
SAMPLE_23161	1416	1655	0.856	0.461088	2	2	0
SAMPLE_16871	949	1109	0.856	0.461127	2	2	0
SAMPLE_29621	1050	1227	0.856	0.461133	2	2	0
SAMPLE_20881	1549	1810	0.856	0.461149	2	2	1
SAMPLE_34694	956	1117	0.856	0.461167	2	2	0
SAMPLE_1205	1057	1235	0.856	0.461169	2	2	0
SAMPLE_5021	986	1152	0.856	0.461179	2	2	0
SAMPLE_19725	1016	1187	0.856	0.461189	2	2	0
SAMPLE_4902	1296	1514	0.856	0.46121	2	2	0
SAMPLE_18062	975	1139	0.856	0.461211	2	2	0
SAMPLE_21737	1207	1410	0.856	0.461215	2	2	0
SAMPLE_9640	773	903	0.856	0.461217	2	2	0
SAMPLE_40279	916	1070	0.856	0.461229	2	2	0
SAMPLE_22599	1535	1793	0.856	0.461238	2	2	0
SAMPLE_30300	1113	1300	0.856	0.461252	2	2	0
SAMPLE_18207	869	1015	0.856	0.461253	2	2	0
SAMPLE_17617	810	946	0.856	0.461276	2	2	0
SAMPLE_20366	1114	1301	0.856	0.461284	2	2	0
SAMPLE_3299	1502	1754	0.856	0.461302	2	2	0
SAMPLE_31928	942	1100	0.856	0.461312	2	2	0
SAMPLE_22766	1241	1449	0.856	0.461338	2	2	0
SAMPLE_16292	955	1115	0.857	0.461353	2	2	0
SAMPLE_22295	1188	1387	0.857	0.461359	2	2	0
SAMPLE_11509	1003	1171	0.857	0.461362	2	2	0
SAMPLE_6357	1267	1479	0.857	0.461398	2	2	0
SAMPLE_22051	1429	1668	0.857	0.461414	2	2	0
SAMPLE_35600	1471	1717	0.857	0.461418	2	2	0
SAMPLE_29938	903	1054	0.857	0.461421	2	2	0
SAMPLE_3826	1144	1335	0.857	0.461476	2	2	0
SAMPLE_10363	1228	1433	0.857	0.461481	2	2	0
SAMPLE_4003	1504	1755	0.857	0.461491	2	2	0
SAMPLE_36895	827	965	0.857	0.461496	2	2	0
SAMPLE_30243	1085	1266	0.857	0.461506	2	2	0
SAMPLE_22452	1445	1686	0.857	0.461514	2	2	0
SAMPLE_3813	1404	1638	0.857	0.461538	2	2	0
SAMPLE_2551	1284	1498	0.857	0.461538	2	2	0
SAMPLE_39467	1050	1225	0.857	0.461538	2	2	1
SAMPLE_24413	1358	1584	0.857	0.461591	2	2	0
SAMPLE_26171	1298	1514	0.857	0.461593	2	2	0
SAMPLE_3564	1268	1479	0.857	0.461594	2	2	0
SAMPLE_21172	1190	1388	0.857	0.461598	2	2	0
SAMPLE_5335	1028	1199	0.857	0.461608	2	2	0
SAMPLE_11834	1004	1171	0.857	0.461609	2	2	0
SAMPLE_4413	1323	1543	0.857	0.461619	2	2	0
SAMPLE_1819	1209	1410	0.857	0.461627	2	2	0
SAMPLE_23858	1185	1382	0.857	0.461628	2	2	0
SAMPLE_30173	1071	1249	0.857	0.461638	2	2	0
SAMPLE_22675	1751	2042	0.857	0.46164	2	2	1
SAMPLE_22725	1342	1565	0.858	0.461644	2	2	0
SAMPLE_33469	903	1053	0.858	0.461656	2	2	0
SAMPLE_18975	813	948	0.858	0.46167	2	2	0
SAMPLE_395	1277	1489	0.858	0.461678	2	2	0
SAMPLE_4064	1729	2016	0.858	0.461682	2	2	0
SAMPLE_20926	1434	1672	0.858	0.461687	2	2	0
SAMPLE_23090	1477	1722	0.858	0.461707	2	2	0
SAMPLE_38506	1025	1195	0.858	0.461712	2	2	0
SAMPLE_22497	1345	1568	0.858	0.461723	2	2	0
SAMPLE_23402	1725	2011	0.858	0.461724	2	2	0
SAMPLE_3589	1406	1639	0.858	0.461741	2	2	0
SAMPLE_1412	2161	2519	0.858	0.461752	2	2	0
SAMPLE_28264	1027	1197	0.858	0.461781	2	2	0
SAMPLE_2214	1456	1697	0.858	0.461782	2	2	0
SAMPLE_26530	1439	1677	0.858	0.46181	2	2	0
SAMPLE_3665	1433	1670	0.858	0.461811	2	2	0
SAMPLE_31893	1131	1318	0.858	0.461821	2	2	0
SAMPLE_27249	1204	1403	0.858	0.461834	2	2	0
SAMPLE_21695	781	910	0.858	0.461857	2	2	0
SAMPLE_12038	1096	1277	0.858	0.461863	2	2	0
SAMPLE_4426	1569	1828	0.858	0.461878	2	2	0
SAMPLE_2316	1097	1278	0.858	0.461895	2	2	0
SAMPLE_2966	1492	1738	0.858	0.46192	2	2	0
SAMPLE_697	1535	1788	0.859	0.461932	2	2	0
SAMPLE_4988	1153	1343	0.859	0.461939	2	2	0
SAMPLE_4537	1402	1633	0.859	0.461944	2	2	0
SAMPLE_1256	1044	1216	0.859	0.461947	2	2	0
SAMPLE_19116	1063	1238	0.859	0.461973	2	2	0
SAMPLE_3069	1641	1911	0.859	0.461993	2	2	0
SAMPLE_23479	1680	1956	0.859	0.462046	2	2	0
SAMPLE_15685	907	1056	0.859	0.462048	2	2	0
SAMPLE_11386	883	1028	0.859	0.462062	2	2	0
SAMPLE_17203	872	1015	0.859	0.462109	2	2	0
SAMPLE_40304	1086	1264	0.859	0.462128	2	2	0
SAMPLE_22319	1300	1513	0.859	0.46214	2	2	0
SAMPLE_570	1546	1799	0.859	0.462182	2	2	0
SAMPLE_40841	1100	1280	0.859	0.462185	2	2	0
SAMPLE_37149	935	1088	0.859	0.462185	2	2	0
SAMPLE_34696	874	1017	0.859	0.462189	2	2	1
SAMPLE_27126	978	1138	0.859	0.462193	2	2	0
SAMPLE_29463	1003	1167	0.859	0.462212	2	2	1
SAMPLE_19301	979	1139	0.86	0.462229	2	2	0
SAMPLE_5266	1175	1367	0.86	0.462234	2	2	0
SAMPLE_17908	863	1004	0.86	0.462239	2	2	0
SAMPLE_26061	1243	1446	0.86	0.462254	2	2	0
SAMPLE_41606	1537	1788	0.86	0.462256	2	2	0
SAMPLE_3903	1476	1717	0.86	0.462261	2	2	0
SAMPLE_12713	974	1133	0.86	0.462269	2	2	0
[truncated: 39,756 more rows]
