# Supplementary material for: Systematic analysis of paralogous regions in 41,755 exomes uncovers clinically relevant variation
Source: Research Square preprint supplement (doi:10.21203/rs.3.rs-2302399/v1), 2022-11-29
Supplement: Supplementary file 7 [file STable15.xlsx]

## Sheet: STable15
Sample	Chrom	Start	End	Recurrence	GeneSymbol
SAMPLE_5152	chr1	1416224	1426115	8	ATAD3B
SAMPLE_274	chr1	235658033	235658151	93	B3GALNT2
SAMPLE_565	chr1	235658033	235658151	93	B3GALNT2
SAMPLE_679	chr1	235658033	235658151	93	B3GALNT2
SAMPLE_835	chr1	235658033	235658151	93	B3GALNT2
SAMPLE_21424	chr1	235658033	235658151	93	B3GALNT2
SAMPLE_1372	chr1	235658033	235658151	93	B3GALNT2
SAMPLE_1420	chr1	235658033	235658151	93	B3GALNT2
SAMPLE_1441	chr1	235658033	235658151	93	B3GALNT2
SAMPLE_1444	chr1	235658033	235658151	93	B3GALNT2
SAMPLE_3199	chr1	235658033	235658151	93	B3GALNT2
SAMPLE_22698	chr1	235658033	235658151	93	B3GALNT2
SAMPLE_22748	chr1	235658033	235658151	93	B3GALNT2
SAMPLE_22775	chr1	235658033	235658151	93	B3GALNT2
SAMPLE_3457	chr1	235658033	235658151	93	B3GALNT2
SAMPLE_22783	chr1	235658033	235658151	93	B3GALNT2
SAMPLE_22784	chr1	235658033	235658151	93	B3GALNT2
SAMPLE_3484	chr1	235658033	235658151	93	B3GALNT2
SAMPLE_22791	chr1	235658033	235658151	93	B3GALNT2
SAMPLE_3493	chr1	235658033	235658151	93	B3GALNT2
SAMPLE_3499	chr1	235658033	235658151	93	B3GALNT2
SAMPLE_22797	chr1	235658033	235658151	93	B3GALNT2
SAMPLE_22806	chr1	235658033	235658151	93	B3GALNT2
SAMPLE_3514	chr1	235658033	235658151	93	B3GALNT2
SAMPLE_3517	chr1	235658033	235658151	93	B3GALNT2
SAMPLE_3529	chr1	235658033	235658151	93	B3GALNT2
SAMPLE_3604	chr1	235658033	235658151	93	B3GALNT2
SAMPLE_28831	chr5	70837270	70837517	7	BDP1
SAMPLE_21969	chr6	31991086	32000726	34	C4B
SAMPLE_23328	chr6	31991086	32000726	34	C4B
SAMPLE_21425	chr1	196758598	196759972	82	CFHR3
SAMPLE_21952	chr1	196758598	196759972	82	CFHR3
SAMPLE_29181	chr1	196758598	196759972	82	CFHR3
SAMPLE_33834	chr1	196758598	196759972	82	CFHR3
SAMPLE_32986	chr3	10090857	10091389	10	FANCD2
SAMPLE_21737	chr1	161598943	161600257	74	FCGR3B
SAMPLE_25997	chr1	161598943	161600257	74	FCGR3B
SAMPLE_28572	chr1	161598943	161600257	74	FCGR3B
SAMPLE_39678	chr1	161598943	161600257	74	FCGR3B
SAMPLE_7294	chr9	80430521	80430696	18	GNAQ
SAMPLE_21969	chr16	222411	223930	192	HBA2
SAMPLE_21976	chr16	222411	223930	192	HBA2
SAMPLE_23346	chr16	222411	223930	192	HBA2
SAMPLE_23347	chr16	222411	223930	192	HBA2
SAMPLE_23555	chr16	222411	223930	192	HBA2
SAMPLE_23564	chr16	222411	223930	192	HBA2
SAMPLE_23565	chr16	222411	223930	192	HBA2
SAMPLE_23599	chr16	222411	223930	192	HBA2
SAMPLE_23693	chr16	222411	223930	192	HBA2
SAMPLE_24161	chr16	222411	223930	192	HBA2
SAMPLE_24624	chr16	222411	223930	192	HBA2
SAMPLE_24919	chr16	222411	223930	192	HBA2
SAMPLE_25424	chr16	222411	223930	192	HBA2
SAMPLE_25699	chr16	222411	223930	192	HBA2
SAMPLE_26109	chr16	222411	223930	192	HBA2
SAMPLE_26250	chr16	222411	223930	192	HBA2
SAMPLE_28012	chr16	222411	223930	192	HBA2
SAMPLE_10873	chr16	222411	223930	192	HBA2
SAMPLE_12688	chr16	222411	223930	192	HBA2
SAMPLE_12697	chr16	222411	223930	192	HBA2
SAMPLE_12703	chr16	222411	223930	192	HBA2
SAMPLE_31070	chr16	222411	223930	192	HBA2
SAMPLE_12880	chr16	222411	223930	192	HBA2
SAMPLE_31172	chr16	222411	223930	192	HBA2
SAMPLE_31175	chr16	222411	223930	192	HBA2
SAMPLE_31263	chr16	222411	223930	192	HBA2
SAMPLE_13084	chr16	222411	223930	192	HBA2
SAMPLE_31407	chr16	222411	223930	192	HBA2
SAMPLE_31518	chr16	222411	223930	192	HBA2
SAMPLE_31695	chr16	222411	223930	192	HBA2
SAMPLE_31822	chr16	222411	223930	192	HBA2
SAMPLE_31823	chr16	222411	223930	192	HBA2
SAMPLE_31867	chr16	222411	223930	192	HBA2
SAMPLE_31868	chr16	222411	223930	192	HBA2
SAMPLE_31966	chr16	222411	223930	192	HBA2
SAMPLE_31967	chr16	222411	223930	192	HBA2
SAMPLE_32038	chr16	222411	223930	192	HBA2
SAMPLE_32385	chr16	222411	223930	192	HBA2
SAMPLE_32470	chr16	222411	223930	192	HBA2
SAMPLE_32471	chr16	222411	223930	192	HBA2
SAMPLE_32472	chr16	222411	223930	192	HBA2
SAMPLE_33066	chr16	222411	223930	192	HBA2
SAMPLE_33067	chr16	222411	223930	192	HBA2
SAMPLE_33069	chr16	222411	223930	192	HBA2
SAMPLE_33417	chr16	222411	223930	192	HBA2
SAMPLE_33578	chr16	222411	223930	192	HBA2
SAMPLE_33579	chr16	222411	223930	192	HBA2
SAMPLE_33638	chr16	222411	223930	192	HBA2
SAMPLE_33640	chr16	222411	223930	192	HBA2
SAMPLE_33972	chr16	222411	223930	192	HBA2
SAMPLE_33973	chr16	222411	223930	192	HBA2
SAMPLE_34140	chr16	222411	223930	192	HBA2
SAMPLE_34195	chr16	222411	223930	192	HBA2
SAMPLE_36708	chr16	222411	223930	192	HBA2
SAMPLE_36710	chr16	222411	223930	192	HBA2
SAMPLE_23693	chr5	68830320	68830866	68	OCLN
SAMPLE_5209	chr5	68830320	68830866	68	OCLN
SAMPLE_24492	chr5	68830320	68830866	68	OCLN
SAMPLE_6862	chr5	68830320	68830866	68	OCLN
SAMPLE_27013	chr5	68830320	68830866	68	OCLN
SAMPLE_9877	chr5	68830320	68830866	68	OCLN
SAMPLE_28807	chr5	68830320	68830866	68	OCLN
SAMPLE_28877	chr5	68830320	68830866	68	OCLN
SAMPLE_29085	chr5	68830320	68830866	68	OCLN
SAMPLE_10831	chr5	68830320	68830866	68	OCLN
SAMPLE_11089	chr5	68830320	68830866	68	OCLN
SAMPLE_31422	chr5	68830320	68830866	68	OCLN
SAMPLE_39065	chr5	68830320	68830866	68	OCLN
SAMPLE_39143	chr5	68830320	68830866	68	OCLN
SAMPLE_39678	chr5	68830320	68830866	68	OCLN
SAMPLE_21675	chrX	153456587	153495110	119	OPN1MW_OPN1MW2_OPN1MW3
SAMPLE_25523	chrX	153456587	153495110	119	OPN1MW_OPN1MW2_OPN1MW3
SAMPLE_6781	chrX	153456587	153495110	119	OPN1MW_OPN1MW2_OPN1MW3
SAMPLE_26055	chrX	153456587	153495110	119	OPN1MW_OPN1MW2_OPN1MW3
SAMPLE_26892	chrX	153456587	153495110	119	OPN1MW_OPN1MW2_OPN1MW3
SAMPLE_26893	chrX	153456587	153495110	119	OPN1MW_OPN1MW2_OPN1MW3
SAMPLE_29700	chrX	153456587	153495110	119	OPN1MW_OPN1MW2_OPN1MW3
SAMPLE_31035	chrX	153456587	153495110	119	OPN1MW_OPN1MW2_OPN1MW3
SAMPLE_31073	chrX	153456587	153495110	119	OPN1MW_OPN1MW2_OPN1MW3
SAMPLE_13138	chrX	153456587	153495110	119	OPN1MW_OPN1MW2_OPN1MW3
SAMPLE_18877	chrX	153456587	153495110	119	OPN1MW_OPN1MW2_OPN1MW3
SAMPLE_37705	chrX	153456587	153495110	119	OPN1MW_OPN1MW2_OPN1MW3
SAMPLE_40655	chrX	153456587	153495110	119	OPN1MW_OPN1MW2_OPN1MW3
SAMPLE_41114	chrX	153456587	153495110	119	OPN1MW_OPN1MW2_OPN1MW3
SAMPLE_37062	chr16	21747381	21747911	5	OTOA
SAMPLE_37080	chr16	21747381	21747911	5	OTOA
SAMPLE_21161	chr16	21764147	21764645	61	OTOA
SAMPLE_6643	chr16	21764147	21764645	61	OTOA
SAMPLE_25844	chr16	21764147	21764645	61	OTOA
SAMPLE_9454	chr16	21764147	21764645	61	OTOA
SAMPLE_28444	chr16	21764147	21764645	61	OTOA
SAMPLE_10519	chr16	21764147	21764645	61	OTOA
SAMPLE_29359	chr16	21764147	21764645	61	OTOA
SAMPLE_31792	chr16	21764147	21764645	61	OTOA
SAMPLE_37521	chr16	21764147	21764645	61	OTOA
SAMPLE_34085	chr14	36064829	36065007	22	RALGAPA1
SAMPLE_37639	chr14	36064829	36065007	22	RALGAPA1
SAMPLE_19915	chr14	36064829	36065007	22	RALGAPA1
SAMPLE_23649	chr5	70247601	70248925	10	SMN1
SAMPLE_6943	chr5	70247601	70248925	10	SMN1
SAMPLE_27880	chr5	70247601	70248925	10	SMN1
SAMPLE_9901	chr5	70247601	70248925	10	SMN1
SAMPLE_29108	chr5	70247601	70248925	10	SMN1
SAMPLE_30394	chr5	70247601	70248925	10	SMN1
SAMPLE_31929	chr5	70247601	70248925	10	SMN1
SAMPLE_31987	chr5	70247601	70248925	10	SMN1
SAMPLE_40265	chr5	70247601	70248925	10	SMN1
