# Supplementary material for: Systematic analysis of paralogous regions in 41,755 exomes uncovers clinically relevant variation
Source: Research Square preprint supplement (doi:10.21203/rs.3.rs-2302399/v1), 2022-11-29
Supplement: Supplementary file 8 [file STable16.xlsx]

## Sheet: STable16
Sample	Chrom	Start	End	Chameleolyser	MLPA
SAMPLE_21194	chr15	43890861	43940464	Homozygous deletion	Homozygous deletion
SAMPLE_21341	chr15	43890861	43940464	Homozygous deletion	Homozygous deletion
SAMPLE_21814	chr15	43895239	43940464	Homozygous deletion	Homozygous deletion
SAMPLE_22078	chr15	43895239	43940464	Homozygous deletion	Homozygous deletion
SAMPLE_22570	chr15	43890861	43940464	Homozygous deletion	Homozygous deletion
SAMPLE_23414	chr15	43890861	43940464	Homozygous deletion	Homozygous deletion
SAMPLE_23736	chr15	43890861	43940464	Homozygous deletion	Homozygous deletion
SAMPLE_23961	chr15	43890861	43940464	Homozygous deletion	Homozygous deletion
SAMPLE_25363	chr15	43895239	43940464	Homozygous deletion	Homozygous deletion
SAMPLE_25723	chr15	43890861	43897797	Homozygous deletion	Homozygous deletion
SAMPLE_27451	chr15	43872496	43940464	Homozygous deletion	Homozygous deletion
SAMPLE_28080	chr15	43890861	43940464	Homozygous deletion	Homozygous deletion
SAMPLE_28471	chr15	43895239	43939865	Homozygous deletion	Homozygous deletion
SAMPLE_28489	chr15	43890861	43940464	Homozygous deletion	Homozygous deletion
SAMPLE_28860	chr15	43872496	43940464	Homozygous deletion	Homozygous deletion
SAMPLE_29277	chr15	43895239	43940464	Homozygous deletion	Homozygous deletion
SAMPLE_29492	chr15	43890861	43940464	Homozygous deletion	Homozygous deletion
SAMPLE_29701	chr15	43890861	43940464	Homozygous deletion	Homozygous deletion
SAMPLE_29702	chr15	43890861	43940464	Homozygous deletion	Homozygous deletion
SAMPLE_29887	chr15	43895239	43940464	Homozygous deletion	Homozygous deletion
SAMPLE_30032	chr15	43895239	43940464	Homozygous deletion	Homozygous deletion
SAMPLE_30050	chr15	43895239	43940464	Homozygous deletion	Homozygous deletion
SAMPLE_30884	chr15	43890861	43940464	Homozygous deletion	Homozygous deletion
SAMPLE_30907	chr15	43890861	43901732	Homozygous deletion	Homozygous deletion
SAMPLE_31744	chr15	43890861	43940464	Homozygous deletion	Homozygous deletion
SAMPLE_32505	chr15	43890861	43940464	Homozygous deletion	Homozygous deletion
SAMPLE_33716	chr15	43895239	43940464	Homozygous deletion	Homozygous deletion
SAMPLE_34932	chr15	43895239	43940464	Homozygous deletion	Homozygous deletion
SAMPLE_35267	chr15	43890861	43940464	Homozygous deletion	Homozygous deletion
SAMPLE_36516	chr15	43890861	43940464	Homozygous deletion	Homozygous deletion
SAMPLE_37743	chr15	43890861	43940464	Homozygous deletion	Homozygous deletion
SAMPLE_37959	chr15	43890861	43940464	Homozygous deletion	Homozygous deletion
SAMPLE_38879	chr15	43890861	43940464	Homozygous deletion	Homozygous deletion
SAMPLE_39179	chr15	43895239	43940464	Homozygous deletion	Homozygous deletion
SAMPLE_39700	chr15	43890861	43940464	Homozygous deletion	Homozygous deletion
SAMPLE_20982	chr15	43895239	43901732	Homozygous conversion	Homozygous deletion
SAMPLE_21134	chr15	43890861	43905704	Homozygous conversion	Homozygous deletion
SAMPLE_21265	chr15	43890861	43940464	Homozygous conversion	Homozygous deletion
SAMPLE_21430	chr15	43890861	43905704	Homozygous conversion	Homozygous deletion
SAMPLE_22882	chr15	43890861	43897797	Homozygous conversion	Homozygous deletion
SAMPLE_23311	chr15	43895239	43897797	Homozygous conversion	Homozygous deletion
SAMPLE_23334	chr15	43890861	43897797	Homozygous conversion	Homozygous deletion
SAMPLE_23352	chr15	43890861	43897797	Homozygous conversion	Homozygous deletion
SAMPLE_23606	chr15	43890861	43897797	Homozygous conversion	Homozygous deletion
SAMPLE_25250	chr15	43890861	43940464	Homozygous conversion	Homozygous deletion
SAMPLE_25664	chr15	43890861	43901732	Homozygous conversion	Homozygous deletion
SAMPLE_27231	chr15	43890861	43901732	Homozygous conversion	Homozygous deletion
SAMPLE_27685	chr15	43890861	43901732	Homozygous conversion	Homozygous deletion
SAMPLE_29934	chr15	43890861	43897797	Homozygous conversion	Homozygous deletion
SAMPLE_31067	chr15	43895239	43901732	Homozygous conversion	Homozygous deletion
SAMPLE_31817	chr15	43890861	43897797	Homozygous conversion	Homozygous deletion
SAMPLE_34681	chr15	43895239	43901732	Homozygous conversion	Homozygous deletion
SAMPLE_35143	chr15	43890861	43901732	Homozygous conversion	Homozygous deletion
SAMPLE_37173	chr15	43890861	43897797	Homozygous conversion	Homozygous deletion
SAMPLE_37773	chr15	43890861	43901732	Homozygous conversion	Homozygous deletion
SAMPLE_39655	chr15	43890861	43940464	Homozygous conversion	Homozygous deletion
SAMPLE_39656	chr15	43890861	43940464	Homozygous conversion	Homozygous deletion
SAMPLE_41045	chr15	43890861	43940464	Homozygous conversion	Homozygous deletion
