# Supplementary material for: Systematic analysis of paralogous regions in 41,755 exomes uncovers clinically relevant variation
Source: Research Square preprint supplement (doi:10.21203/rs.3.rs-2302399/v1), 2022-11-29
Supplement: Supplementary file 9 [file STable17.xlsx]

## Sheet: STable17
Sample	Chrom	Start	End	Chameleolyser	ExomeDepth
SAMPLE_23599	chr15	43990685	43993767	gene conversion	deletion
SAMPLE_25220	chr15	43902916	43905704	gene conversion	deletion
SAMPLE_6760	chr15	43897261	43897797	gene conversion	deletion
SAMPLE_25952	chr15	43899860	43901732	gene conversion	deletion
SAMPLE_26041	chr15	43902916	43905704	gene conversion	deletion
SAMPLE_26109	chr15	43899860	43901732	gene conversion	deletion
SAMPLE_26330	chr15	43902916	43905704	gene conversion	deletion
SAMPLE_26457	chr15	43902916	43905704	gene conversion	deletion
SAMPLE_27323	chr15	43902916	43905704	gene conversion	deletion
SAMPLE_27392	chr15	43902916	43905704	gene conversion	deletion
SAMPLE_27612	chr15	43901273	43901732	gene conversion	deletion
SAMPLE_28234	chr15	43902916	43905704	gene conversion	deletion
SAMPLE_10003	chr15	43990685	43993767	gene conversion	deletion
SAMPLE_10095	chr15	43901273	43901732	gene conversion	deletion
SAMPLE_28810	chr15	43902916	43905704	gene conversion	deletion
SAMPLE_29391	chr15	43901273	43901732	gene conversion	deletion
SAMPLE_11761	chr15	43990685	43993767	gene conversion	deletion
SAMPLE_11084	chr15	43899860	43901732	gene conversion	deletion
SAMPLE_30788	chr15	43899860	43901732	gene conversion	deletion
SAMPLE_12913	chr15	43902916	43905704	gene conversion	deletion
SAMPLE_13542	chr15	43902916	43905704	gene conversion	deletion
SAMPLE_31868	chr15	43902916	43905704	gene conversion	deletion
SAMPLE_32035	chr15	43902916	43905704	gene conversion	deletion
SAMPLE_32050	chr15	43899860	43900601	gene conversion	deletion
SAMPLE_14624	chr15	43902916	43905704	gene conversion	deletion
SAMPLE_14998	chr15	43899860	43901732	gene conversion	deletion
SAMPLE_14999	chr15	43899860	43901732	gene conversion	deletion
SAMPLE_33578	chr15	43902916	43905704	gene conversion	deletion
SAMPLE_34193	chr15	43902916	43905704	gene conversion	deletion
SAMPLE_34249	chr15	43899860	43901732	gene conversion	deletion
SAMPLE_16751	chr15	43902916	43905704	gene conversion	deletion
SAMPLE_16968	chr15	43899860	43901732	gene conversion	deletion
SAMPLE_17205	chr15	43899860	43901732	gene conversion	deletion
SAMPLE_36836	chr15	43899860	43901732	gene conversion	deletion
SAMPLE_37151	chr15	43902916	43905704	gene conversion	deletion
SAMPLE_18358	chr15	43902916	43905704	gene conversion	deletion
SAMPLE_18359	chr15	43902916	43905704	gene conversion	deletion
SAMPLE_18360	chr15	43902916	43905704	gene conversion	deletion
SAMPLE_38023	chr15	43899860	43901732	gene conversion	deletion
SAMPLE_38957	chr15	43899860	43900601	gene conversion	deletion
SAMPLE_19988	chr15	43901273	43901732	gene conversion	deletion
SAMPLE_20127	chr15	43899860	43900601	gene conversion	deletion
SAMPLE_39976	chr15	43901273	43901732	gene conversion	deletion
SAMPLE_40442	chr15	43899860	43901732	gene conversion	deletion
SAMPLE_20318	chr15	43899860	43901732	gene conversion	deletion
SAMPLE_40919	chr15	43927357	43993767	gene conversion	deletion
SAMPLE_20491	chr15	43899860	43900601	gene conversion	deletion
