# Supplementary material for: Systematic analysis of paralogous regions in 41,755 exomes uncovers clinically relevant variation
Source: Research Square preprint supplement (doi:10.21203/rs.3.rs-2302399/v1), 2022-11-29
Supplement: Supplementary file 10 [file STable18.xlsx]

## Sheet: STable18
GeneSymbol	Biotype	ENSG	ENST	Exons	Fraction	NrOfCodExonsInvolved	NrOfCodingBases	OMIM
CFH	protein_coding	ENSG00000000971	ENST00000367429	21	0.0454545	1	183	Atypical hemolytic uremic syndrome with H factor anomaly/De novo thrombotic microangiopathy after kidney transplantation/Dense deposit disease/Familial drusen/HELLP syndrome/Immunodeficiency with factor H anomaly/Immunoglobulin-mediated membranoproliferative glomerulonephritis/BASAL LAMINAR DRUSEN/COMPLEMENT FACTOR H DEFICIENCY/HEMOLYTIC UREMIC SYNDROME ATYPICAL SUSCEPTIBILITY TO 1/MACULAR DEGENE…
CFTR	protein_coding	ENSG00000001626	ENST00000003084	10	0.037037	1	82	Aquagenic palmoplantar keratoderma/Congenital bilateral absence of vas deferens/Cystic Fibrosis/Hereditary chronic pancreatitis/Idiopathic bronchiectasis/Male infertility with azoospermia or oligozoospermia due to single gene mutation/BRONCHIECTASIS WITH OR WITHOUT ELEVATED SWEAT CHLORIDE 1/PANCREATITIS HEREDITARY/VAS DEFERENS CONGENITAL BILATERAL APLASIA OF
CD99	protein_coding	ENSG00000002586	ENST00000381192	2,3,4,5,6,7,9,10	0.8	14	770	/
M6PR	protein_coding	ENSG00000003056	/	/	/	0	0	/
AK2	protein_coding	ENSG00000004455	ENST00000354858	1,2,3	0.5	10	330	RETICULAR DYSGENESIS
RECQL	protein_coding	ENSG00000004700	ENST00000444129	15	0.0666667	2	153	/
POLR2J	protein_coding	ENSG00000005075	ENST00000292614	3	0.25	2	337	/
ACSM3	protein_coding	ENSG00000005187	/	/	/	0	0	/
CIAPIN1	protein_coding	ENSG00000005194	ENST00000394391	2,3,5,7,9	0.555556	12	706	/
MSL3	protein_coding	ENSG00000005302	ENST00000312196	6,7,8,9,10,11,13	0.538462	23	1001	MSL3 syndrome
YBX2	protein_coding	ENSG00000006047	ENST00000007699	1,4,5,6	0.444444	4	750	/
KRT33A	protein_coding	ENSG00000006059	ENST00000007735	4,5	0.285714	2	288	/
AP2B1	protein_coding	ENSG00000006125	/	/	/	0	0	/
SPATA20	protein_coding	ENSG00000006282	ENST00000006658	15,17	0.117647	3	291	/
BAIAP2L1	protein_coding	ENSG00000006453	/	/	/	0	0	/
AGK	protein_coding	ENSG00000006530	ENST00000649286	8,13,16	0.1875	9	287	Congenital cataract-hypertrophic cardiomyopathy-mitochondrial myopathy syndrome/Total early-onset cataract/CATARACT 38/Sengers syndrome
FARP2	protein_coding	ENSG00000006607	/	/	/	0	0	/
DBF4	protein_coding	ENSG00000006634	ENST00000265728	1,2,3,9,10,12	0.5	6	1619	/
COX10	protein_coding	ENSG00000006695	ENST00000261643	6	0.142857	1	233	Isolated cytochrome C oxidase deficiency/Leigh syndrome/MITOCHONDRIAL COMPLEX IV DEFICIENCY
GTF2IRD1	protein_coding	ENSG00000006704	ENST00000455841	12,13,14,16,17,18,19	0.259259	8	611	Williams syndrome
ARSD	protein_coding	ENSG00000006756	ENST00000381154	1,2,3,4,7,8,9,10	0.8	8	1200	/
PNPLA4	protein_coding	ENSG00000006757	ENST00000381042	3.4	0.285714	3	212	/
MYH13	protein_coding	ENSG00000006788	ENST00000418404	3.4	0.05	2	155	/
PAFAH1B1	protein_coding	ENSG00000007168	/	/	/	0	0	17p13,3 microduplication syndrome/Lissencephaly due to LIS1 mutation/Miller-Dieker syndrome/Subcortical band heterotopia/LISSENCEPHALY 1/LISSENCEPHALY TYPE 1
NOS2	protein_coding	ENSG00000007171	ENST00000313735	16,18,19,21	0.148148	4	230	HYPERTENSION ESSENTIAL/MALARIA SUSCEPTIBILITY TO MALARIA RESISTANCE TO INCLUDED
RHBDF1	protein_coding	ENSG00000007384	ENST00000262316	6,7,8,9,11,12,14,16,17,18	0.555556	10	1672	/
CDK11A	protein_coding	ENSG00000008128	ENST00000378633	2,6,7,8,9,10,11,12,13,14,17,18,19,20	0.7	20	1811	/
DLEC1	protein_coding	ENSG00000008226	ENST00000308059	35	0.027027	1	145	Squamous cell carcinoma of the esophagus
MPND	protein_coding	ENSG00000008382	/	/	/	0	0	/
MGST1	protein_coding	ENSG00000008394	/	/	/	0	0	/
ST3GAL1	protein_coding	ENSG00000008513	ENST00000521180	4,5,6,8,9	0.555556	8	878	/
IL32	protein_coding	ENSG00000008517	ENST00000534507	6	0.166667	18	245	/
PKD1	protein_coding	ENSG00000008710	ENST00000262304	15.22	0.0434783	2	3348	Autosomal dominant polycystic kidney disease/Autosomal dominant polycystic kidney disease type 1 with tuberous sclerosis/POLYCYSTIC KIDNEY DISEASE 1 WITH OR WITHOUT POLYCYSTIC LIVER DISEASE
VTA1	protein_coding	ENSG00000009844	/	/	/	0	0	/
NCAPD2	protein_coding	ENSG00000010292	ENST00000315579	21,22,23,24,25,26,27,29,30,31,32	0.34375	11	1545	MICROCEPHALY 21 PRIMARY AUTOSOMAL RECESSIVE/Microcephaly with short stature
IDS	protein_coding	ENSG00000010404	ENST00000340855	2.3	0.222222	3	393	Mucopolysaccharidosis type 2 attenuated form/Mucopolysaccharidosis type 2 severe form/MUCOPOLYSACCHARIDOSIS TYPE II/MUCOPOLYSACCHARIDOSIS TYPE 2
PRSS3	protein_coding	ENSG00000010438	ENST00000361005	3.4	0.4	2	258	/
NME1-NME2	protein_coding	ENSG00000011052	ENST00000393193	7.8	0.25	4	231	/
BTBD7	protein_coding	ENSG00000011114	ENST00000334746	3	0.0909091	1	115	/
RNF216	protein_coding	ENSG00000011275	ENST00000389902	2,6,7,8	0.235294	4	450	Cerebellar ataxia-hypogonadism syndrome/GORDON HOLMES SYNDROME
PTBP1	protein_coding	ENSG00000011304	ENST00000356948	4,5,6,7,8,10,12,13,15	0.6	12	1342	/
WIZ	protein_coding	ENSG00000011451	ENST00000599686	2,3,4,5,6,7,8	0.875	12	2497	/
KDM5D	protein_coding	ENSG00000012817	/	/	/	0	0	SPERMATOGENIC FAILURE Y-LINKED 2
DNASE1L1	protein_coding	ENSG00000013563	/	/	/	0	0	/
DDX11	protein_coding	ENSG00000013573	ENST00000545668	10,12,13,14,18,19,20	0.259259	7	586	WARSAW BREAKAGE SYNDROME
SLC30A9	protein_coding	ENSG00000014824	/	/	/	0	0	Psychomotor regression-oculomotor apraxia-movement disorder-nephropathy syndrome/Birk-Landau-Perez syndrome
RGPD5	protein_coding	ENSG00000015568	ENST00000016946	23	0.0434783	1	35	/
AGPS	protein_coding	ENSG00000018510	/	/	/	0	0	Rhizomelic chondrodysplasia punctata type 3
PHLDB1	protein_coding	ENSG00000019144	/	/	/	0	0	/
ZFP64	protein_coding	ENSG00000020256	/	/	/	3	1031	/
MRE11	protein_coding	ENSG00000020922	ENST00000323929	2,3,4,6,9,11,12,13,15	0.45	9	1213	Ataxia-telangiectasia-like disorder/Hereditary breast and ovarian cancer syndrome/NIJMEGEN BREAKAGE SYNDROME-LIKE DISORDER/ATAXIA-TELANGIECTASIA-LIKE DISORDER 1/ATAXIA TELANGIECTASIA-LIKE DISORDER
ZNF839	protein_coding	ENSG00000022976	ENST00000442396	2.5	0.25	3	350	/
GRAMD1B	protein_coding	ENSG00000023171	/	/	/	0	0	/
DERA	protein_coding	ENSG00000023697	/	/	/	0	0	/
PHF20	protein_coding	ENSG00000025293	/	/	/	0	0	/
RTEL1-TNFRSF6B	protein_coding	ENSG00000026036	ENST00000492259	1,2,3	0.0857143	3	301	/
MIPEP	protein_coding	ENSG00000027001	ENST00000382172	3	0.0526316	1	37	Lethal left ventricular non-compaction-seizures-hypotonia-cataract-developmental delay syndrome/COMBINED OXIDATIVE PHOSPHORYLATION DEFICIENCY 31
BRD9	protein_coding	ENSG00000028310	ENST00000467963	11	0.0625	1	53	/
BCLAF1	protein_coding	ENSG00000029363	ENST00000531224	3,4,5,6,7,9,10,11,12,13	0.769231	17	2677	/
IFT88	protein_coding	ENSG00000032742	/	/	/	0	0	Retinitis pigmentosa
ABCF2	protein_coding	ENSG00000033050	ENST00000287844	10.13	0.133333	2	195	/
LRRC7	protein_coding	ENSG00000033122	/	/	/	0	0	/
DEPDC1B	protein_coding	ENSG00000035499	/	/	/	0	0	/
NSUN2	protein_coding	ENSG00000037474	/	/	/	0	0	Autosomal recessive non-syndromic intellectual disability/Dubowitz syndrome/MENTAL RETARDATION AUTOSOMAL RECESSIVE 5/Autosomal- Recessive Intellectual Disability MRT5
ZPBP	protein_coding	ENSG00000042813	/	/	/	0	0	/
CUL7	protein_coding	ENSG00000044090	/	/	/	0	0	3M syndrome/THREE M SYNDROME 1/3-M syndrome 1
CTNNA1	protein_coding	ENSG00000044115	ENST00000302763	3,4,5,6,7,9,10,11,12,13,15,16,17,18	0.777778	17	2408	Butterfly-shaped pigment dystrophy/Hereditary diffuse gastric cancer/MACULAR DYSTROPHY PATTERNED 2
CNTLN	protein_coding	ENSG00000044459	/	/	/	0	0	/
OFD1	protein_coding	ENSG00000046651	ENST00000340096	1,2,3,6,7,8,9,10,12,13,14,15,16,17,18,20,21,23	0.782609	26	2651	Orofaciodigital syndrome type 1/Orofaciodigital syndrome type 6/Primary ciliary dyskinesia/Retinitis pigmentosa/X-linked recessive intellectual disability-macrocephaly-ciliary dysfunction syndrome/JOUBERT SYNDROME 10/OROFACIODIGITAL SYNDROME I/RETINITIS PIGMENTOSA 23/Simpson-Golabi-Behmel syndrome type 2/JOUBERT SYNDROME TYPE 10/ORAL-FACIAL-DIGITAL SYNDROME TYPE 1
MAP4	protein_coding	ENSG00000047849	/	/	/	0	0	/
SNX29	protein_coding	ENSG00000048471	/	/	/	0	0	/
FAM120A	protein_coding	ENSG00000048828	ENST00000277165	6.7	0.111111	2	388	/
ERCC8	protein_coding	ENSG00000049167	/	/	/	0	0	Cockayne syndrome type 1/Cockayne syndrome type 2/Cockayne syndrome type 3/UV-sensitive syndrome/Cockayne syndrome A/UV-SENSITIVE SYNDROME 2/Cockayne syndrome type A
RCN1	protein_coding	ENSG00000049449	/	/	/	0	0	/
JKAMP	protein_coding	ENSG00000050130	ENST00000554271	4.5	0.285714	3	345	/
ARHGEF5	protein_coding	ENSG00000050327	ENST00000056217	2,3,4,5,6,7,8,9,10,11,12,13	0.8	13	3728	/
NFE2L3	protein_coding	ENSG00000050344	ENST00000056233	1,2,4	0.75	3	1893	/
THOC3	protein_coding	ENSG00000051596	ENST00000265097	2,3,4,5,6	0.833333	9	955	/
FOXN3	protein_coding	ENSG00000053254	ENST00000345097	2,3,6,7	0.571429	10	1330	/
AKR7A2	protein_coding	ENSG00000053371	ENST00000235835	3,4,5,6,7	0.714286	5	590	/
THRAP3	protein_coding	ENSG00000054118	ENST00000354618	3,4,5,6,7,9,10,11,12	0.75	12	2777	/
PLEKHH1	protein_coding	ENSG00000054690	/	/	/	0	0	/
CUL1	protein_coding	ENSG00000055130	ENST00000325222	2,3,4,7,8,9,10,13,14,16,17,20,21,22	0.636364	28	1671	/
KMT2C	protein_coding	ENSG00000055609	ENST00000262189	7,8,14	0.0508475	3	1054	Kleefstra syndrome due to a point mutation/KLEEFSTRA SYNDROME 2/Intellectual disability
ZFR	protein_coding	ENSG00000056097	ENST00000265069	3,4,5,8,10,20	0.3	6	761	Autosomal recessive spastic paraplegia type 71
GYG2	protein_coding	ENSG00000056998	ENST00000381163	2,3,4	0.25	5	249	/
GDI2	protein_coding	ENSG00000057608	ENST00000380191	2	0.0909091	1	89	/
CROCC	protein_coding	ENSG00000058453	ENST00000375541	16	0.027027	1	31	/
FLYWCH1	protein_coding	ENSG00000059122	ENST00000253928	3,4,5,7,8,9	0.6	7	1673	/
SLC2A3	protein_coding	ENSG00000059804	ENST00000075120	8	0.1	1	102	HUNTINGTON DISEASE
YBX3	protein_coding	ENSG00000060138	ENST00000228251	1,4,5,6,7,8,9	0.7	8	1021	/
ACAA1	protein_coding	ENSG00000060971	/	/	/	0	0	/
ARSF	protein_coding	ENSG00000062096	ENST00000381127	3,4,11	0.272727	4	470	/
ELMO2	protein_coding	ENSG00000062598	ENST00000290246	3,4,5,6,7,8,9,10	0.363636	12	756	Primary intraosseous venous malformation/Ramon syndrome/VASCULAR MALFORMATION PRIMARY INTRAOSSEOUS/Intraosseous Vascular Malformation
EPN1	protein_coding	ENSG00000063245	/	/	/	0	0	/
SPA17	protein_coding	ENSG00000064199	ENST00000532692	1.4	0.5	4	298	/
FAR2	protein_coding	ENSG00000064763	/	/	/	0	0	/
IPO5	protein_coding	ENSG00000065150	/	/	/	0	0	/
ROPN1	protein_coding	ENSG00000065371	ENST00000184183	5	0.142857	1	162	/
KARS	protein_coding	ENSG00000065427	/	/	/	0	0	Autosomal recessive intermediate Charcot-Marie-Tooth disease type B/Autosomal recessive non-syndromic sensorineural deafness type DFNB/CHARCOT-MARIE-TOOTH DISEASE RECESSIVE INTERMEDIATE B/DEAFNESS AUTOSOMAL RECESSIVE 89
MYLK	protein_coding	ENSG00000065534	ENST00000360304	13,14,15,16,17	0.151515	5	1592	Familial thoracic aortic aneurysm and aortic dissection/Megacystis-microcolon-intestinal hypoperistalsis syndrome/AORTIC ANEURYSM FAMILIAL THORACIC 7
MAP2K4	protein_coding	ENSG00000065559	ENST00000415385	12	0.0833333	2	114	/
MTHFD2	protein_coding	ENSG00000065911	/	/	/	0	0	/
SLC9A7	protein_coding	ENSG00000065923	ENST00000616978	8,10,11,12,15,17	0.352941	12	817	/
ELOVL1	protein_coding	ENSG00000066322	/	/	/	0	0	/
GOLGA5	protein_coding	ENSG00000066455	ENST00000163416	2,3,10,11,13	0.384615	5	953	Differentiated thyroid carcinoma
THUMPD1	protein_coding	ENSG00000066654	ENST00000396083	1,2,3,4	1	6	920	/
ACSM2B	protein_coding	ENSG00000066813	ENST00000329697	2,3,4,5,9,11,12	0.5	9	1012	/
FECH	protein_coding	ENSG00000066926	ENST00000652755	3	0.0909091	2	109	Autosomal erythropoietic protoporphyria/PROTOPORPHYRIA ERYTHROPOIETIC 1
MYO9A	protein_coding	ENSG00000066933	/	/	/	0	0	Presynaptic congenital myasthenic syndromes/MYASTHENIC SYNDROME CONGENITAL 24 PRESYNAPTIC
PHKA1	protein_coding	ENSG00000067177	ENST00000373542	1,2,4	0.09375	6	406	Glycogen storage disease due to muscle phosphorylase kinase deficiency/GLYCOGEN STORAGE DISEASE TYPE IXd
PMS2P4	transcribed_unprocessed_pseudogene	ENSG00000067601	/	/	/	0	0	/
ROCK1	protein_coding	ENSG00000067900	ENST00000399799	33	0.030303	1	4	/
MEF2A	protein_coding	ENSG00000068305	ENST00000557942	3,4,6,8	0.333333	5	731	CORONARY ARTERY DISEASE AUTOSOMAL DOMINANT 1
ADGRF5	protein_coding	ENSG00000069122	ENST00000283296	17,18,19,20	0.190476	8	211	/
NUCKS1	protein_coding	ENSG00000069275	ENST00000367142	3,5,6,7	0.571429	4	554	/
VPS35	protein_coding	ENSG00000069329	ENST00000299138	2,3,4,5,6,7,8,9,10,11,12	0.647059	12	1563	Hereditary late-onset Parkinson disease/PARKINSON DISEASE 17
PLA2G10	protein_coding	ENSG00000069764	ENST00000438167	1	0.25	1	97	/
ATP1B3	protein_coding	ENSG00000069849	ENST00000286371	2,3,4,6,7	0.714286	7	680	/
PFN2	protein_coding	ENSG00000070087	/	/	/	0	0	/
EXOC5	protein_coding	ENSG00000070367	ENST00000621441	2,3,4,7,9,11,12,13,14,16,17,18	0.666667	14	1742	/
ASNS	protein_coding	ENSG00000070669	ENST00000394308	8.1	0.153846	2	5	Congenital microcephaly-severe encephalopathy-progressive cerebral atrophy syndrome/Asparagine synthetase deficiency
RPS6KA2	protein_coding	ENSG00000071242	/	/	/	0	0	/
TCF3	protein_coding	ENSG00000071564	ENST00000262965	7,9,10,11,15,17,18,19	0.421053	12	1026	Autosomal agammaglobulinemia/Precursor B-cell acute lymphoblastic leukemia/AGAMMAGLOBULINEMIA 8 AUTOSOMAL DOMINANT
CPSF1	protein_coding	ENSG00000071894	ENST00000616140	7,8,9,10,12,17,18,19,22,23,25,26,27,30,31,32,37	0.447368	35	2264	/
EPN2	protein_coding	ENSG00000072134	/	/	/	0	0	/
ASAH2C	protein_coding	ENSG00000072444	/	/	/	15	1443	/
CHFR	protein_coding	ENSG00000072609	/	/	/	0	0	/
FCGR2B	protein_coding	ENSG00000072694	ENST00000358671	1,2,4,5	0.5	5	502	Systemic lupus erythematosus/MALARIA SUSCEPTIBILITY TO MALARIA RESISTANCE TO INCLUDED
FBXW11	protein_coding	ENSG00000072803	ENST00000265094	3,4,5,6,7,8,9,10,12	0.692308	9	1403	/
ALPK1	protein_coding	ENSG00000073331	/	/	/	0	0	/
SDHA	protein_coding	ENSG00000073578	/	/	/	0	0	Familial isolated dilated cardiomyopathy/Gastrointestinal stromal tumor/Hereditary pheochromocytoma-paraganglioma/Isolated succinate-CoQ reductase deficiency/Leigh syndrome with leukodystrophy/CARDIOMYOPATHY DILATED 1GG/Leigh syndrome/Mitochondrial complex II deficiency/PARAGANGLIOMAS 5
NSF	protein_coding	ENSG00000073969	ENST00000398238	1,2,3,4,5,6,7,8,9,10,11,12,13	0.619048	14	1470	/
CLNS1A	protein_coding	ENSG00000074201	ENST00000525428	2,3,4,5,6	0.714286	5	588	/
TIPIN	protein_coding	ENSG00000075131	/	/	/	0	0	/
SLC25A40	protein_coding	ENSG00000075303	/	/	/	0	0	/
TMEM131	protein_coding	ENSG00000075568	/	/	/	0	0	/
FSCN1	protein_coding	ENSG00000075618	ENST00000382361	1,2,3,4,5	1	5	1482	/
TUBA3D	protein_coding	ENSG00000075886	ENST00000321253	2,3,5	0.6	3	669	KERATOCONUS 9
RBMS2	protein_coding	ENSG00000076067	ENST00000262031	1,2,4,5	0.285714	8	486	/
UNG	protein_coding	ENSG00000076248	/	/	/	0	0	Hyper-IgM syndrome type 5/IMMUNODEFICIENCY WITH HYPER-IgM TYPE 5
PPP1R12B	protein_coding	ENSG00000077157	ENST00000391959	2,3,4,5,6,7,8,14	0.32	8	1033	/
DYNC1I2	protein_coding	ENSG00000077380	ENST00000397119	2,3,7,8,9,10,11,12,13,14,15,16,17,18	0.777778	20	1748	/
TYR	protein_coding	ENSG00000077498	ENST00000263321	5	0.2	1	224	Minimal pigment oculocutaneous albinism type 1/Ocular albinism with congenital sensorineural deafness/Oculocutaneous albinism type 1A/Oculocutaneous albinism type 1B/Temperature-sensitive oculocutaneous albinism type 1/ALBINISM OCULAR WITH SENSORINEURAL DEAFNESS/ALBINISM OCULOCUTANEOUS TYPE IA/ALBINISM OCULOCUTANEOUS TYPE IB/SKIN/HAIR/EYE PIGMENTATION VARIATION IN 3/Oculocutaneous Albinism Type 1
FKBP6	protein_coding	ENSG00000077800	ENST00000252037	1.2	0.222222	4	217	/
TULP3	protein_coding	ENSG00000078246	ENST00000397132	7	0.0833333	1	99	/
MLLT10	protein_coding	ENSG00000078403	/	/	/	0	0	Precursor T-cell acute lymphoblastic leukemia/LEUKEMIA ACUTE MYELOID
VDAC3	protein_coding	ENSG00000078668	ENST00000521158	6,8,9,11	0.363636	7	624	/
XRCC5	protein_coding	ENSG00000079246	/	/	/	0	0	/
SP140	protein_coding	ENSG00000079263	ENST00000392045	24,25,26	0.111111	3	331	/
RABL2B	protein_coding	ENSG00000079974	ENST00000395593	3,5,7,8,9,10	0.6	12	613	/
CNOT4	protein_coding	ENSG00000080802	/	/	/	0	0	/
CFHR2	protein_coding	ENSG00000080910	ENST00000367415	1	0.2	5	58	/
CROCCP3	transcribed_unprocessed_pseudogene	ENSG00000080947	/	/	/	0	0	/
PTPRC	protein_coding	ENSG00000081237	/	/	/	0	0	T-B+ severe combined immunodeficiency due to CD45 deficiency/HEPATITIS C VIRUS SUSCEPTIBILITY TO/Severe combined immunodeficiency autosomal recessive T cell-negative B cell-positive NK cell-positive
DUSP12	protein_coding	ENSG00000081721	ENST00000367943	2,3,4	0.5	3	192	/
AACS	protein_coding	ENSG00000081760	ENST00000316519	9,10,11,12,13,14,15,16,17,18	0.555556	10	1008	/
PCDHA6	protein_coding	ENSG00000081842	ENST00000529310	1	0.25	2	1283	/
PCDHGA2	protein_coding	ENSG00000081853	/	/	/	0	0	/
WDR70	protein_coding	ENSG00000082068	/	/	/	0	0	/
FYB1	protein_coding	ENSG00000082074	/	/	/	0	0	THROMBOCYTOPENIA 3
STRADB	protein_coding	ENSG00000082146	ENST00000194530	4,5,6,7,8,9,10,12	0.666667	9	1133	/
BZW1	protein_coding	ENSG00000082153	ENST00000452790	3	0.0833333	1	108	/
ME2	protein_coding	ENSG00000082212	ENST00000321341	2,3,4,6,7,9,10,11,12,13,15,16	0.75	17	1494	/
CCNT2	protein_coding	ENSG00000082258	ENST00000264157	9	0.111111	2	300	/
MRPL22	protein_coding	ENSG00000082515	ENST00000523037	3.7	0.285714	4	246	/
TRPM3	protein_coding	ENSG00000083067	/	/	/	0	0	/
TNPO1	protein_coding	ENSG00000083312	/	/	/	0	0	/
NUFIP1	protein_coding	ENSG00000083635	ENST00000379161	1,3,6,7,8,9,10	0.7	7	1265	/
ZNF324	protein_coding	ENSG00000083812	ENST00000536459	4	0.25	3	1289	/
ZNF586	protein_coding	ENSG00000083828	/	/	/	0	0	/
FAT1	protein_coding	ENSG00000083857	/	/	/	0	0	/
PPIE	protein_coding	ENSG00000084072	/	/	/	0	0	/
GSTP1	protein_coding	ENSG00000084207	ENST00000398606	6.7	0.285714	3	296	/
WBP11	protein_coding	ENSG00000084463	ENST00000261167	2,4,5,6,7,8,9,10,11,12	0.833333	10	1537	/
EIF3I	protein_coding	ENSG00000084623	ENST00000373586	7.1	0.181818	2	182	/
NKAIN1	protein_coding	ENSG00000084628	/	/	/	0	0	/
EFR3B	protein_coding	ENSG00000084710	/	/	/	0	0	/
SLC25A24	protein_coding	ENSG00000085491	/	/	/	0	0	Gorlin-Chaudhry-Moss syndrome/Progeroid syndrome Petty type/FONTAINE PROGEROID SYNDROME/Gorlin-Chaudhry-Moss syndrome (GCMS); Syndrome with Hypertrichosis Progeroid Appearance and Mitochondrial Dysfunction
RRN3	protein_coding	ENSG00000085721	ENST00000198767	1,2,3,4,5,6,7,8,9,10,16	0.611111	16	840	/
MTIF2	protein_coding	ENSG00000085760	ENST00000263629	8,9,10,11,12,13,14,15,16	0.5625	11	1444	/
EPS15	protein_coding	ENSG00000085832	/	/	/	0	0	/
FOLH1	protein_coding	ENSG00000086205	ENST00000256999	11,15,16,17,19	0.263158	7	711	/
ZFAND6	protein_coding	ENSG00000086666	ENST00000613266	3,5,6,7	0.571429	10	527	/
NOX4	protein_coding	ENSG00000086991	ENST00000263317	16	0.0555556	1	69	/
OGFOD1	protein_coding	ENSG00000087263	ENST00000566157	4,5,7,10,11,13	0.461538	7	915	/
AURKA	protein_coding	ENSG00000087586	ENST00000347343	3	0.111111	1	128	/
AAMDC	protein_coding	ENSG00000087884	/	/	/	0	0	/
METTL2A	protein_coding	ENSG00000087995	ENST00000311506	3,4,5,6	0.444444	4	607	/
KHSRP	protein_coding	ENSG00000088247	ENST00000398148	2,8,9,10,11,12,13,17,19,20	0.5	11	1064	/
DOCK3	protein_coding	ENSG00000088538	/	/	/	0	0	NEURODEVELOPMENTAL DISORDER WITH IMPAIRED INTELLECTUAL DEVELOPMENT HYPOTONIA AND ATAXIA
SNX5	protein_coding	ENSG00000089006	ENST00000377768	3,4,5,7,8,12,14	0.5	7	751	/
PEBP1	protein_coding	ENSG00000089220	/	/	/	0	0	/
ERP29	protein_coding	ENSG00000089248	ENST00000261735	2.3	0.666667	4	642	/
ZNF302	protein_coding	ENSG00000089335	ENST00000446502	4.5	0.333333	3	208	/
ZBTB25	protein_coding	ENSG00000089775	/	/	/	2	80	/
NECAP1	protein_coding	ENSG00000089818	/	/	/	0	0	Undetermined early-onset epileptic encephalopathy/Epileptic encephalopathy early infantile 21
DHX32	protein_coding	ENSG00000089876	/	/	/	0	0	/
SPTLC1	protein_coding	ENSG00000090054	ENST00000262554	3	0.0666667	1	95	Hereditary sensory and autonomic neuropathy type 1/NEUROPATHY HEREDITARY SENSORY AND AUTONOMIC TYPE IA
NDUFB2	protein_coding	ENSG00000090266	ENST00000476279	3	0.25	3	75	/
IRAK3	protein_coding	ENSG00000090376	/	/	/	0	0	ASTHMA-RELATED TRAITS SUSCEPTIBILITY TO 5
PDPR	protein_coding	ENSG00000090857	ENST00000288050	3,4,5,6,8,9,10,11,12,13,14,15,16,17	0.736842	16	1930	/
DTX2	protein_coding	ENSG00000091073	ENST00000324432	4,5,6,7,8,9,10,11	0.666667	10	1641	/
ABCC6	protein_coding	ENSG00000091262	ENST00000205557	5,6,7,8,9	0.16129	5	702	Generalized arterial calcification of infancy/Pseudoxanthoma elasticum/Arterial calcification generalized of infancy 2/PSEUDOXANTHOMA ELASTICUM FORME FRUSTEPSEUDOXANTHOMA ELASTICUM HETEROZYGOUS INCLUDED
FH	protein_coding	ENSG00000091483	ENST00000366560	7,8,9,10	0.4	4	629	Fumaric aciduria/HEREDITARY LEIOMYOMATOSIS AND RENAL CELL CANCER/Hereditary pheochromocytoma-paraganglioma/FUMARASE DEFICIENCY
CDV3	protein_coding	ENSG00000091527	ENST00000264993	1,3,4,5	0.8	8	702	/
RGS17	protein_coding	ENSG00000091844	ENST00000206262	2.4	0.4	4	354	/
HAUS4	protein_coding	ENSG00000092036	ENST00000206474	4,5,6,7,8,10	0.6	11	813	/
MYH7	protein_coding	ENSG00000092054	ENST00000355349	27	0.025	1	349	Classic multiminicore myopathy/Ebstein malformation/Familial isolated dilated cardiomyopathy/Hyaline body myopathy/Laing early-onset distal myopathy/Left ventricular noncompaction/MYH7-related late-onset scapuloperoneal muscular dystrophy/CARDIOMYOPATHY DILATED 1S/CARDIOMYOPATHY FAMILIAL HYPERTROPHIC 1/MYOPATHY CONGENITAL WITH FIBER-TYPE DISPROPORTION/MYOPATHY DISTAL 1/MYOPATHY MYOSIN STORAGE AUT…
HNRNPC	protein_coding	ENSG00000092199	/	/	/	0	0	/
RPGRIP1	protein_coding	ENSG00000092200	/	/	/	0	0	Cone rod dystrophy/Leber congenital amaurosis/Meckel syndrome/CONE-ROD DYSTROPHY 13/LEBER CONGENITAL AMAUROSIS 6
SUPT16H	protein_coding	ENSG00000092201	ENST00000216297	2,3,4,5,6,7,8,10,12,13,14,15,16,17,18,19,20,22,23,24,26	0.807692	21	2784	/
TOX4	protein_coding	ENSG00000092203	ENST00000613569	4,5,6,8,9,10	0.6	12	1710	/
GEMIN2	protein_coding	ENSG00000092208	/	/	/	0	0	/
TBL1Y	protein_coding	ENSG00000092377	ENST00000383032	8,9,10,11,12,13,15,16	0.421053	8	763	/
TYRO3	protein_coding	ENSG00000092445	ENST00000263798	1,2,3,4,6,7,8,9,10,11,12,14,15,16,17,18,19	0.894737	19	2498	/
SNAP23	protein_coding	ENSG00000092531	/	/	/	0	0	/
CBX5	protein_coding	ENSG00000094916	ENST00000209875	2,3,4,5	0.8	6	383	/
MRPS18A	protein_coding	ENSG00000096080	ENST00000372133	3,4,6	0.5	3	344	/
PGC	protein_coding	ENSG00000096088	/	/	/	0	0	/
HNRNPH3	protein_coding	ENSG00000096746	ENST00000265866	6.1	0.2	3	189	/
JAK2	protein_coding	ENSG00000096968	/	/	/	0	0	BUDD-CHIARI SYNDROME/Essential thrombocythemia/Familial thrombocytosis/POLYCYTHEMIA VERA/Primary myelofibrosis/ERYTHROCYTOSIS FAMILIAL 1/LEUKEMIA ACUTE MYELOID/MYELOFIBROSIS MYELOFIBROSIS WITH MYELOID METAPLASIA INCLUDED/THROMBOCYTHEMIA 3
SCD	protein_coding	ENSG00000099194	ENST00000370355	1,2,3,4,5,6	1	6	1080	/
HSD17B7P2	transcribed_unprocessed_pseudogene	ENSG00000099251	/	/	/	0	0	/
WASHC2A	protein_coding	ENSG00000099290	ENST00000282633	8,22,26	0.0967742	3	324	/
PSMD8	protein_coding	ENSG00000099341	ENST00000215071	4,5,6,7	0.571429	6	524	/
PCDH11Y	protein_coding	ENSG00000099715	ENST00000362095	1.2	0.666667	5	3115	/
AMELY	protein_coding	ENSG00000099721	/	/	/	0	0	/
HNRNPM	protein_coding	ENSG00000099783	ENST00000325495	6,7,10,14	0.25	6	538	/
TECR	protein_coding	ENSG00000099797	ENST00000215567	5.6	0.153846	2	220	Autosomal recessive non-syndromic intellectual disability/MENTAL RETARDATION AUTOSOMAL RECESSIVE 14
POLRMT	protein_coding	ENSG00000099821	ENST00000588649	3,4,5,6,7,8,9,10,11,12,13,15,17,19,21	0.714286	15	3222	/
HCN2	protein_coding	ENSG00000099822	/	/	/	0	0	/
ZDHHC8	protein_coding	ENSG00000099904	ENST00000405930	8,9,10,11	0.363636	6	1614	/
MED15	protein_coding	ENSG00000099917	/	/	/	0	0	/
P2RX6	protein_coding	ENSG00000099957	ENST00000413302	1,2,3	0.25	4	387	/
DDTL	protein_coding	ENSG00000099974	ENST00000215770	1.2	0.666667	2	284	/
DDT	protein_coding	ENSG00000099977	ENST00000398344	1.2	0.666667	6	505	/
GSTT2	polymorphic_pseudogene	ENSG00000099984	/	/	/	0	0	/
SUSD2	protein_coding	ENSG00000099994	ENST00000358321	2,3,4,5	0.266667	4	706	/
TOP3B	protein_coding	ENSG00000100038	ENST00000398793	17.18	0.111111	3	495	/
CRYBB2P1	transcribed_unprocessed_pseudogene	ENSG00000100058	/	/	/	0	0	/
GRK3	protein_coding	ENSG00000100077	/	/	/	0	0	/
ANKRD54	protein_coding	ENSG00000100124	ENST00000215941	3.8	0.25	6	106	/
TPTEP1	transcribed_unprocessed_pseudogene	ENSG00000100181	/	/	/	0	0	/
CYP2D6	protein_coding	ENSG00000100197	ENST00000645361	2,3,4,5,7,8,9	0.777778	10	906	Antidepressant or antipsychotic toxicity or dose selection/Codeine toxicity/Resistance to tamoxifene/DRUG METABOLISM POOR CYP2D6-RELATED DRUG METABOLISM ULTRARAPID CYP2D6-RELATED INCLUDED
XBP1	protein_coding	ENSG00000100219	ENST00000216037	3.5	0.4	6	616	MAJOR AFFECTIVE DISORDER 7
PPP6R2	protein_coding	ENSG00000100239	ENST00000612753	12,13,14,15,16,17,18,19,20,21,22	0.458333	24	1219	/
SBF1	protein_coding	ENSG00000100241	ENST00000380817	3,5,6,7,8,9,12,14,16,19,20,22,23,24,25,26,27,28,30,31,32,33,34,36,38,40,41	0.658537	28	3868	Charcot-Marie-Tooth disease type 4B3/CHARCOT-MARIE-TOOTH DISEASE TYPE 4B3
MIOX	protein_coding	ENSG00000100253	ENST00000216075	10	0.1	3	107	/
AP1B1	protein_coding	ENSG00000100280	ENST00000357586	2	0.0434783	3	74	/
NEFH	protein_coding	ENSG00000100285	ENST00000310624	2,3,4	0.75	3	1756	Amyotrophic lateral sclerosis/AMYOTROPHIC LATERAL SCLEROSIS 1/Charcot-Marie-Tooth disease axonal type 2CC
ACR	protein_coding	ENSG00000100312	ENST00000216139	5	0.2	1	555	/
RBFOX2	protein_coding	ENSG00000100320	/	/	/	0	0	/
SAMM50	protein_coding	ENSG00000100347	ENST00000350028	5	0.0666667	1	107	/
CSF2RB	protein_coding	ENSG00000100368	ENST00000403662	2,3,4	0.214286	4	365	Hereditary pulmonary alveolar proteinosis/SURFACTANT METABOLISM DYSFUNCTION PULMONARY 5
SLC25A17	protein_coding	ENSG00000100372	/	/	/	0	0	/
ST13	protein_coding	ENSG00000100380	/	/	/	0	0	/
PRMT5	protein_coding	ENSG00000100462	ENST00000324366	13,14,17	0.176471	6	357	/
PIGH	protein_coding	ENSG00000100564	ENST00000216452	2.4	0.5	4	303	GLYCOSYLPHOSPHATIDYLINOSITOL BIOSYNTHESIS DEFECT 17
PSMA3	protein_coding	ENSG00000100567	ENST00000216455	4	0.0909091	1	99	/
LGMN	protein_coding	ENSG00000100600	ENST00000393218	3,4,10,11,12,13,15	0.466667	10	910	/
DHRS7	protein_coding	ENSG00000100612	/	/	/	0	0	/
PPM1A	protein_coding	ENSG00000100614	ENST00000325642	2,3,4,6	0.666667	7	1018	/
HIF1A	protein_coding	ENSG00000100644	ENST00000539097	14	0.0666667	1	127	/
EIF5	protein_coding	ENSG00000100664	/	/	/	0	0	/
MTHFD1	protein_coding	ENSG00000100714	ENST00000652337	5,6,7,8,10,11,12,14,16,18,20,21,23,24,25,26	0.571429	19	2211	Cervical spina bifida aperta/Cervical spina bifida cystica/Cervicothoracic spina bifida aperta/Cervicothoracic spina bifida cystica/Lumbosacral spina bifida aperta/Lumbosacral spina bifida cystica/Thoracolumbosacral spina bifida aperta/Thoracolumbosacral spina bifida cystica/Total spina bifida aperta/Total spina bifida cystica/Upper thoracic spina bifida aperta/Upper thoracic spina bifida cystica…
YY1	protein_coding	ENSG00000100811	ENST00000262238	5	0.2	1	73	GABRIELE-DE VRIES SYNDROME/Intellectual disability
CHMP4B	protein_coding	ENSG00000101421	ENST00000217402	2,3,4	0.6	3	420	Early-onset posterior polar cataract/Early-onset posterior subcapsular cataract/CATARACT 31 MULTIPLE TYPES
ASIP	protein_coding	ENSG00000101440	/	/	/	0	0	SKIN/HAIR/EYE PIGMENTATION VARIATION IN 9
PIGU	protein_coding	ENSG00000101464	/	/	/	3	338	/
MYL12A	protein_coding	ENSG00000101608	ENST00000580887	2,3,4	0.75	7	510	/
RBBP8	protein_coding	ENSG00000101773	/	/	/	0	0	JAWAD SYNDROME/Seckel syndrome/SECKEL SYNDROME 2
RIOK3	protein_coding	ENSG00000101782	ENST00000339486	4,5,7,8,9	0.384615	5	596	/
ATG4A	protein_coding	ENSG00000101844	ENST00000372232	4.13	0.153846	2	170	/
STS	protein_coding	ENSG00000101846	ENST00000217961	2,3,4,5,6	0.5	5	707	Recessive X-linked ichthyosis/Syndromic recessive X-linked ichthyosis/ICHTHYOSIS X-LINKED
TBL1X	protein_coding	ENSG00000101849	/	/	/	0	0	/
GPR143	protein_coding	ENSG00000101850	ENST00000467482	9	0.111111	1	83	X-linked recessive ocular albinism/ALBINISM OCULAR TYPE I/NYSTAGMUS 6 CONGENITAL X-LINKED
NKAP	protein_coding	ENSG00000101882	ENST00000371410	4	0.111111	1	120	/
XIAP	protein_coding	ENSG00000101966	ENST00000371199	2	0.142857	1	102	X-linked lymphoproliferative disease/LYMPHOPROLIFERATIVE SYNDROME X-LINKED 1/LYMPHOPROLIFERATIVE SYNDROME X-LINKED 2
STAG2	protein_coding	ENSG00000101972	/	/	/	0	0	Xq25 microduplication syndrome/NEURODEVELOPMENTAL DISORDER X-LINKED WITH CRANIOFACIALABNORMALITIES/STAG2-related developmental delay with microcephaly and congenital anomalies
ABCD1	protein_coding	ENSG00000101986	/	/	/	0	0	Adrenomyeloneuropathy/CADDS/X-linked cerebral adrenoleukodystrophy/Adrenoleukodystrophy/Adrenoleukodystrophy X-Linked
LUZP4	protein_coding	ENSG00000102021	ENST00000371920	2	0.25	1	113	/
ASB9	protein_coding	ENSG00000102048	ENST00000380488	1,3,4,5,6,7	0.857143	11	798	/
ZC3H12B	protein_coding	ENSG00000102053	/	/	/	0	0	/
SLC25A14	protein_coding	ENSG00000102078	ENST00000612248	3,4,5,7,9,10,12	0.583333	16	665	/
PQBP1	protein_coding	ENSG00000102103	/	/	/	0	0	Hamel cerebro-palato-cardiac syndrome/X-linked intellectual disability Golabi-Ito-Hall type/X-linked intellectual disability Porteous type/X-linked intellectual disability Sutherland-Haan type/RENPENNING SYNDROME 1
RAB40AL	protein_coding	ENSG00000102128	ENST00000218249	1	1	1	837	/
PGK1	protein_coding	ENSG00000102144	/	/	/	0	0	Glycogen storage disease due to phosphoglycerate kinase 1 deficiency/PHOSPHOGLYCERATE KINASE 1 DEFICIENCY
PCDH11X	protein_coding	ENSG00000102290	ENST00000373094	1.2	0.285714	3	3025	/
PIN4	protein_coding	ENSG00000102309	ENST00000664196	3.4	0.5	5	288	/
KLF8	protein_coding	ENSG00000102349	ENST00000468660	1,3,4,5,6	0.833333	9	1018	NONSYNDROMIC MENTAL RETARDATION
CENPI	protein_coding	ENSG00000102384	ENST00000372927	9,10,11,12,13,14,16	0.333333	7	825	/
FGF14	protein_coding	ENSG00000102466	/	/	/	0	0	Spinocerebellar ataxia type 27/SPINOCEREBELLAR ATAXIA 27
FNDC3A	protein_coding	ENSG00000102531	/	/	/	0	0	/
STK24	protein_coding	ENSG00000102572	ENST00000376547	2,4,5,6,7,8,10,11	0.727273	12	1167	/
PARP4	protein_coding	ENSG00000102699	ENST00000381989	4,5,6,11,12,13,14,15	0.235294	8	957	/
MRPS31	protein_coding	ENSG00000102738	/	/	/	0	0	/
FLT1	protein_coding	ENSG00000102755	ENST00000282397	21,22,23,24,25,26,27,29,30	0.3	13	1136	Preeclampsia
VWA8	protein_coding	ENSG00000102763	ENST00000379310	37	0.0222222	1	190	/
DGKH	protein_coding	ENSG00000102780	/	/	/	0	0	/
INTS6	protein_coding	ENSG00000102786	ENST00000311234	2,3,4,5,6,7,8,9,10,11,12,13,14,15,16,17,18	0.944444	23	2553	/
CORO1A	protein_coding	ENSG00000102879	ENST00000219150	10.11	0.181818	4	137	Severe combined immunodeficiency due to CORO1A deficiency/Immunodeficiency 8
LONP2	protein_coding	ENSG00000102910	/	/	/	0	0	/
POLR2C	protein_coding	ENSG00000102978	ENST00000219252	5,7,9	0.333333	3	418	/
PSMD7	protein_coding	ENSG00000103035	ENST00000219313	2,3,4,6,7	0.714286	7	824	/
HAS3	protein_coding	ENSG00000103044	/	/	/	1	108	/
NOMO3	protein_coding	ENSG00000103226	ENST00000399336	10,11,13,14,16,19,20	0.225806	7	914	/
PIEZO1	protein_coding	ENSG00000103335	/	/	/	0	0	Dehydrated hereditary stomatocytosis/Dehydrated hereditary stomatocytosis 1 with or without pseudohyperkalemia and/or perinatal edema/LYMPHATIC MALFORMATION 6/Congenital lymphatic dysplasia with hydrops and/or lymphoedema
UBFD1	protein_coding	ENSG00000103353	ENST00000395878	3.7	0.285714	3	184	/
SALL1	protein_coding	ENSG00000103449	ENST00000251020	2.3	0.666667	4	3654	TOWNES-BROCKS SYNDROME/TOWNES-BROCKS SYNDROME 1
NOMO1	protein_coding	ENSG00000103512	ENST00000287667	10.11	0.0645161	2	257	/
RAB11A	protein_coding	ENSG00000103769	/	/	/	0	0	Autosomal dominant non-syndromic intellectual disability/Epilepsy and intellectual disability
CSPP1	protein_coding	ENSG00000104218	/	/	/	0	0	Joubert Syndrome/Joubert syndrome with Jeune asphyxiating thoracic dystrophy/Meckel syndrome/JOUBERT SYNDROME 21/Joubert Syndrome with or without Jeune Asphyxiating Thoracic Dystrophy
TRPA1	protein_coding	ENSG00000104321	ENST00000262209	11.12	0.0740741	2	326	Familial episodic pain syndrome with predominantly upper body involvement/EPISODIC PAIN SYNDROME FAMILIAL 1
LAPTM4B	protein_coding	ENSG00000104341	ENST00000445593	2	0.142857	1	94	/
UBE2W	protein_coding	ENSG00000104343	ENST00000650817	3.5	0.285714	2	248	/
GML	protein_coding	ENSG00000104499	/	/	/	0	0	/
NEFM	protein_coding	ENSG00000104722	ENST00000221166	3	0.333333	6	984	/
KCTD9	protein_coding	ENSG00000104756	/	/	/	0	0	/
HNRNPL	protein_coding	ENSG00000104824	ENST00000221419	1	0.0769231	1	222	/
TUBB4A	protein_coding	ENSG00000104833	ENST00000264071	1,2,3,4	1	10	1334	Hypomyelination with atrophy of basal ganglia and cerebellum/Primary dystonia DYT4 type/DYSTONIA 4 TORSION AUTOSOMAL DOMINANT/LEUKODYSTROPHY HYPOMYELINATING 6/HYPOMYELINATION WITH ATROPHY OF THE BASAL GANGLIA AND CEREBELLUM
DKKL1	protein_coding	ENSG00000104901	ENST00000221498	2,3,4,5	0.8	5	612	/
LILRB1	protein_coding	ENSG00000104972	ENST00000324602	12,13,14,15	0.266667	4	290	/
AKAP8	protein_coding	ENSG00000105127	ENST00000269701	4,5,10,11	0.285714	4	537	/
ZNF419	protein_coding	ENSG00000105136	ENST00000424930	3,4,5	0.6	11	840	/
SIGLEC5	protein_coding	ENSG00000105501	ENST00000534261	2,3,4	0.3	3	700	/
RASA4	protein_coding	ENSG00000105808	ENST00000262940	1,2,3,4,5,6,7,8,9,10,11,17	0.571429	14	1056	/
BET1	protein_coding	ENSG00000105829	ENST00000222547	2.4	0.5	3	272	/
NAMPT	protein_coding	ENSG00000105835	ENST00000222553	7	0.0909091	1	94	/
STEAP1B	protein_coding	ENSG00000105889	ENST00000404369	3.4	0.4	3	477	/
H2AFV	protein_coding	ENSG00000105968	/	/	/	0	0	/
COBL	protein_coding	ENSG00000106078	/	/	/	0	0	/
PLEKHA8	protein_coding	ENSG00000106086	/	/	/	0	0	/
GARS	protein_coding	ENSG00000106105	ENST00000389266	12,14,15,16	0.235294	4	468	Autosomal dominant Charcot-Marie-Tooth disease type 2D/Distal hereditary motor neuropathy type 5/CHARCOT-MARIE-TOOTH DISEASE AXONAL TYPE 2D/NEURONOPATHY DISTAL HEREDITARY MOTOR TYPE VA
NSUN5P2	transcribed_unprocessed_pseudogene	ENSG00000106133	/	/	/	0	0	/
SNX8	protein_coding	ENSG00000106266	/	/	/	0	0	/
ZNHIT1	protein_coding	ENSG00000106400	ENST00000305105	2.4	0.4	2	233	/
EZH2	protein_coding	ENSG00000106462	ENST00000320356	20	0.05	4	61	Weaver syndrome/WEAVER SYNDROME 2
MEST	protein_coding	ENSG00000106484	/	/	/	0	0	/
ACTR3C	protein_coding	ENSG00000106526	ENST00000252071	2,3,4,6	0.5	6	396	/
MRPL32	protein_coding	ENSG00000106591	ENST00000223324	3	0.333333	1	226	/
URGCP	protein_coding	ENSG00000106608	/	/	/	0	0	/
TMEM248	protein_coding	ENSG00000106609	/	/	/	0	0	/
RHEB	protein_coding	ENSG00000106615	/	/	/	0	0	/
AEBP1	protein_coding	ENSG00000106624	/	/	/	0	0	EHLERS-DANLOS SYNDROME CLASSIC-LIKE 2
POLD2	protein_coding	ENSG00000106628	ENST00000610533	2,3,4,6,8,9,11	0.636364	13	980	/
FSD1L	protein_coding	ENSG00000106701	/	/	/	0	0	/
CNTNAP3	protein_coding	ENSG00000106714	ENST00000297668	4,6,10	0.125	3	505	/
AKNA	protein_coding	ENSG00000106948	/	/	/	0	0	/
DNM1	protein_coding	ENSG00000106976	/	/	/	0	0	Lennox-Gastaut syndrome/Undetermined early-onset epileptic encephalopathy/EPILEPTIC ENCEPHALOPATHY EARLY INFANTILE 31/Epileptic encephalopathy
RLN2	protein_coding	ENSG00000107014	ENST00000381627	1	0.5	1	211	/
RLN1	protein_coding	ENSG00000107018	ENST00000223862	1	0.5	1	211	/
PLGRKT	protein_coding	ENSG00000107020	/	/	/	0	0	/
KANK1	protein_coding	ENSG00000107104	ENST00000619269	6,7,9,10	0.307692	4	593	Inherited congenital spastic tetraplegia/Cerebral palsy spastic quadriplegic 2/CEREBRAL PALSY SPASTIC QUADRIPLEGIC TYPE 2
EXOSC3	protein_coding	ENSG00000107371	/	/	/	0	0	Pontocerebellar hypoplasia type 1/PONTOCEREBELLAR HYPOPLASIA TYPE 1B
CCNJ	protein_coding	ENSG00000107443	/	/	/	0	0	/
CUBN	protein_coding	ENSG00000107611	/	/	/	0	0	Imerslund-Grasbeck syndrome/MEGALOBLASTIC ANEMIA 1
DDX50	protein_coding	ENSG00000107625	ENST00000373585	5	0.0666667	1	118	/
PALD1	protein_coding	ENSG00000107719	/	/	/	0	0	/
CCSER2	protein_coding	ENSG00000107771	/	/	/	0	0	/
BMPR1A	protein_coding	ENSG00000107779	ENST00000372037	3,4,5,6,7	0.384615	5	530	Familial colorectal cancer Type X/Generalized juvenile polyposis/juvenile polyposis coli/Hereditary mixed polyposis syndrome/Juvenile polyposis of infancy/Juvenile polyposis syndrome/POLYPOSIS SYNDROME HEREDITARY MIXED 2
LIPA	protein_coding	ENSG00000107798	/	/	/	0	0	Cholesteryl ester storage disease/WOLMAN DISEASE/Lysosomal acid lipase deficiency
FBXW4	protein_coding	ENSG00000107829	ENST00000664783	1,3,4,5,7,8,9	0.777778	9	1542	SPLIT-HAND/FOOT MALFORMATION TYPE 3
TNKS2	protein_coding	ENSG00000107854	/	/	/	0	0	/
ARHGAP21	protein_coding	ENSG00000107863	ENST00000396432	9.26	0.0769231	7	2516	/
ANKRD26	protein_coding	ENSG00000107890	/	/	/	0	0	Hereditary thrombocytopenia with normal platelets-hematological cancer predisposition syndrome/THROMBOCYTOPENIA 2
GLRX3	protein_coding	ENSG00000108010	ENST00000368644	4,5,10,11	0.333333	5	471	/
TFAM	protein_coding	ENSG00000108064	/	/	/	0	0	MITOCHONDRIAL DNA DEPLETION SYNDROME 15 (HEPATOCEREBRAL TYPE)
DHX40	protein_coding	ENSG00000108406	ENST00000251241	4,5,6,7,8,9,10,11,12,13,14	0.611111	11	1380	/
TRIM16L	protein_coding	ENSG00000108448	ENST00000395671	5	0.2	1	584	/
MED13	protein_coding	ENSG00000108510	ENST00000397786	9	0.0333333	1	193	MED13 - Neurodevelopment disorder
CPD	protein_coding	ENSG00000108582	ENST00000225719	12	0.047619	1	277	/
ASIC2	protein_coding	ENSG00000108684	/	/	/	0	0	/
PEX12	protein_coding	ENSG00000108733	ENST00000613219	1,2,3	1	5	1080	Infantile Refsum disease/NEONATAL ADRENOLEUKODYSTROPHY/Zellweger Syndrome/PEROXISOME BIOGENESIS DISORDER 3A (ZELLWEGER)/Peroxisome biogenesis disorder 3B/Peroxisome biogenesis disorder complementation group 3
RAB5C	protein_coding	ENSG00000108774	/	/	/	0	0	/
HSD17B1P1	unprocessed_pseudogene	ENSG00000108785	/	/	/	0	0	/
HSD17B1	protein_coding	ENSG00000108786	ENST00000225929	1,2,3,4,6	0.833333	6	642	/
SMURF2	protein_coding	ENSG00000108854	ENST00000262435	1,4,5,6	0.210526	4	337	/
SLC16A6	protein_coding	ENSG00000108932	ENST00000327268	5,6,7	0.428571	7	1092	/
PRKAR1A	protein_coding	ENSG00000108946	ENST00000392711	2,3,7,9,11	0.454545	10	570	Acrodysostosis/Acrodysostosis with multiple hormone resistance/ACUTE PROMYELOCYTIC LEUKEMIA/Carney complex/Familial atrial myxoma/Primary pigmented nodular adrenocortical disease/ACRODYSOSTOSIS 1 WITH OR WITHOUT HORMONE RESISTANCE/Carney complex type 1/MYXOMA INTRACARDIAC/PIGMENTED NODULAR ADRENOCORTICAL DISEASE PRIMARY 1
YWHAE	protein_coding	ENSG00000108953	/	/	/	0	0	17p13,3 microduplication syndrome/Clear cell sarcoma of kidney/Distal 17p13,3 microdeletion syndrome/Endometrial stromal sarcoma/Miller-Dieker syndrome
AC130689.1	processed_pseudogene	ENSG00000108958	/	/	/	0	0	/
MYH1	protein_coding	ENSG00000109061	ENST00000226207	23	0.025	1	121	/
TMEM97	protein_coding	ENSG00000109084	/	/	/	0	0	/
SMR3A	protein_coding	ENSG00000109208	ENST00000226460	2	0.333333	1	54	/
KIAA1211	protein_coding	ENSG00000109265	/	/	/	0	0	/
AREG	protein_coding	ENSG00000109321	ENST00000395748	2,3,4,5	0.666667	5	858	/
ELF2	protein_coding	ENSG00000109381	ENST00000379550	5,7,8,9	0.444444	8	1318	/
TBC1D9	protein_coding	ENSG00000109436	/	/	/	0	0	/
KLHL2	protein_coding	ENSG00000109466	ENST00000514860	2,3,4,5	0.266667	7	518	/
FRG1	protein_coding	ENSG00000109536	ENST00000226798	8	0.111111	1	111	Facioscapulohumeral dystrophy/FACIOSCAPULOHUMERAL MUSCULAR DYSTROPHY 1
CLCN3	protein_coding	ENSG00000109572	ENST00000347613	3,4,5,9	0.285714	7	1101	/
SLC2A9	protein_coding	ENSG00000109667	/	/	/	0	0	Hereditary renal hypouricemia/HYPOURICEMIA RENAL 2
SNX25	protein_coding	ENSG00000109762	ENST00000504273	3,4,5,7	0.210526	6	1165	/
KLF3	protein_coding	ENSG00000109787	/	/	/	0	0	/
NCAPG	protein_coding	ENSG00000109805	ENST00000251496	11,16,18,21	0.190476	4	536	/
SIAE	protein_coding	ENSG00000110013	/	/	/	0	0	AUTOIMMUNE DISEASE SUSCEPTIBILITY TO 6
CEP164	protein_coding	ENSG00000110274	/	/	/	0	0	Senior-Loken syndrome/NEPHRONOPHTHISIS 15
MDK	protein_coding	ENSG00000110492	/	/	/	0	0	/
CARS	protein_coding	ENSG00000110619	ENST00000380525	7	0.0434783	1	92	Inflammatory myofibroblastic tumor/Microcephaly Developmental Delay and Brittle Hair and Nails
RPS13	protein_coding	ENSG00000110700	ENST00000525634	4,5,6	0.5	5	330	/
VWF	protein_coding	ENSG00000110799	ENST00000261405	23,24,25,26,27,28,29,30,31,32,33,34	0.230769	12	2875	von Willebrand disease type 1/Von Willebrand disease type 2A/VON WILLEBRAND DISEASE TYPE 2B/von Willebrand disease type 2M/von Willebrand disease type 2N/von Willebrand disease type 3/VON WILLEBRAND DISEASE TYPE 1/VON WILLEBRAND DISEASE TYPE 2/VON WILLEBRAND DISEASE TYPE 3
BIN2	protein_coding	ENSG00000110934	ENST00000651098	4	0.0769231	1	95	/
ATP5F1B	protein_coding	ENSG00000110955	ENST00000262030	2,3,6,7,8,9	0.6	6	777	/
PARP11	protein_coding	ENSG00000111224	/	/	/	0	0	/
GPN3	protein_coding	ENSG00000111231	ENST00000543199	4,7,8	0.375	5	277	/
RAD51AP1	protein_coding	ENSG00000111247	ENST00000228843	3,5,7,8,9,10	0.6	8	616	/
CUX2	protein_coding	ENSG00000111249	/	/	/	0	0	Lennox-Gastaut syndrome/EPILEPTIC ENCEPHALOPATHY EARLY INFANTILE 67/Developmental epileptic encephalopathy
EIF2B1	protein_coding	ENSG00000111361	/	/	/	0	0	Congenital or early infantile CACH syndrome/Cree leukoencephalopathy/Juvenile or adult CACH syndrome/Late infantile CACH syndrome/OVARIOLEUKODYSTROPHY/LEUKOENCEPHALOPATHY WITH VANISHING WHITE MATTER
DDX55	protein_coding	ENSG00000111364	ENST00000238146	6,7,11,12,13,14	0.428571	9	981	/
RFC5	protein_coding	ENSG00000111445	/	/	/	0	0	/
KRR1	protein_coding	ENSG00000111615	ENST00000229214	2,4,7,10	0.4	5	505	/
MRPL51	protein_coding	ENSG00000111639	ENST00000229238	1.3	0.666667	6	276	/
NANOG	protein_coding	ENSG00000111704	ENST00000229307	1,2,3	0.75	4	5	/
SUDS3	protein_coding	ENSG00000111707	ENST00000543473	6,7,10,12	0.333333	4	458	/
HCFC2	protein_coding	ENSG00000111727	/	/	/	0	0	/
CLEC4A	protein_coding	ENSG00000111729	/	/	/	0	0	/
PHC1	protein_coding	ENSG00000111752	ENST00000544916	2,3,5,6,7,8,9,10,11,12,13,14,15	0.866667	15	2934	Autosomal recessive primary microcephaly/MICROCEPHALY 11 PRIMARY AUTOSOMAL RECESSIVE/Primary microcephaly
AL021546.1	protein_coding	ENSG00000111780	/	/	/	0	0	/
SRSF9	protein_coding	ENSG00000111786	ENST00000229390	3.4	0.5	2	317	/
AC009533.1	unprocessed_pseudogene	ENSG00000111788	/	/	/	0	0	/
BTN3A3	protein_coding	ENSG00000111801	ENST00000244519	3.4	0.181818	3	433	/
GCNT2	protein_coding	ENSG00000111846	/	/	/	0	0	Total early-onset cataract/BLOOD GROUP I SYSTEM/CATARACT 13 WITH ADULT i PHENOTYPE
RNGTT	protein_coding	ENSG00000111880	/	/	/	0	0	/
MTRF1L	protein_coding	ENSG00000112031	ENST00000367233	4	0.142857	1	101	/
CD83	protein_coding	ENSG00000112149	ENST00000379153	3	0.2	2	222	/
CAP2	protein_coding	ENSG00000112186	ENST00000229922	2,3,5,7,8,10,12	0.538462	9	709	/
ZNF451	protein_coding	ENSG00000112200	ENST00000370706	1.2	0.133333	7	105	/
E2F3	protein_coding	ENSG00000112242	ENST00000346618	1	0.142857	1	119	/
WASF1	protein_coding	ENSG00000112290	ENST00000392588	6,9,10	0.3	6	253	Intellectual Disability with Seizures
VNN1	protein_coding	ENSG00000112299	/	/	/	0	0	/
PHACTR2	protein_coding	ENSG00000112419	/	/	/	0	0	/
UNC93A	protein_coding	ENSG00000112494	ENST00000230256	8	0.125	2	110	/
MRPL2	protein_coding	ENSG00000112651	ENST00000388752	2,3,4,5,7	0.714286	9	664	/
MEP1A	protein_coding	ENSG00000112818	/	/	/	0	0	/
PCDHB2	protein_coding	ENSG00000112852	ENST00000194155	2	1	1	213	/
HSPA9	protein_coding	ENSG00000113013	ENST00000297185	1,4,5,7,8,9,10,11,12,13,14,15,16,17	0.823529	14	1819	Autosomal recessive sideroblastic anemia/EVEN-PLUS SYNDROME/ANEMIA SIDEROBLASTIC 4
FAF2	protein_coding	ENSG00000113194	ENST00000261942	3,7,8,9,10	0.454545	5	659	/
PCDHB3	protein_coding	ENSG00000113205	ENST00000231130	1	1	1	216	/
BTNL8	protein_coding	ENSG00000113303	ENST00000340184	6.7	0.25	4	54	/
CCNG1	protein_coding	ENSG00000113328	ENST00000340828	2,3,6	0.428571	7	609	/
POLR3G	protein_coding	ENSG00000113356	/	/	/	0	0	/
SUB1	protein_coding	ENSG00000113387	/	/	/	0	0	/
RAD1	protein_coding	ENSG00000113456	ENST00000382038	2	0.166667	1	198	/
BRIX1	protein_coding	ENSG00000113460	ENST00000336767	2,8,9,10	0.4	4	472	/
SKP1	protein_coding	ENSG00000113558	/	/	/	0	0	/
RARS	protein_coding	ENSG00000113643	ENST00000231572	7,8,10,11,13,15	0.4	6	613	RARS-related autosomal recessive hypomyelinating leukodystrophy/LEUKODYSTROPHY HYPOMYELINATING 9
CSNK1A1	protein_coding	ENSG00000113712	ENST00000261798	2	0.0909091	1	107	/
SMC4	protein_coding	ENSG00000113810	/	/	/	0	0	/
UBE3A	protein_coding	ENSG00000114062	ENST00000650110	7,8,9,10,11,13,14	0.5	11	2155	15q11q13 microduplication syndrome/Angelman syndrome due to a point mutation/Angelman syndrome due to imprinting defect in 15q11-q13/Angelman syndrome due to maternal 15q11q13 deletion/Angelman syndrome due to paternal uniparental disomy of chromosome 15/Angelman syndrome
ARMC8	protein_coding	ENSG00000114098	ENST00000469044	6,9,11,12,17,19,21	0.318182	11	828	/
RNF7	protein_coding	ENSG00000114125	ENST00000273480	3	0.333333	3	119	/
USP9Y	protein_coding	ENSG00000114374	/	/	/	0	0	Partial chromosome Y deletion/SPERMATOGENIC FAILURE Y-LINKED 2
FRMD4B	protein_coding	ENSG00000114541	/	/	/	0	0	/
ROPN1B	protein_coding	ENSG00000114547	ENST00000514116	5	0.142857	3	162	/
MRPL3	protein_coding	ENSG00000114686	ENST00000264995	1,2,4,5,7,10	0.6	8	738	Combined oxidative phosphorylation defect type 9/COMBINED OXIDATIVE PHOSPHORYLATION DEFICIENCY 9
AADAC	protein_coding	ENSG00000114771	ENST00000232892	5	0.2	1	160	/
PIKFYVE	protein_coding	ENSG00000115020	/	/	/	0	0	FLECK CORNEAL DYSTROPHY/CORNEAL DYSTROPHY FLECK
ACTR3	protein_coding	ENSG00000115091	ENST00000263238	12	0.0833333	2	94	/
MRPL19	protein_coding	ENSG00000115364	/	/	/	0	0	/
COQ10B	protein_coding	ENSG00000115520	ENST00000263960	2,3,5	0.6	5	436	/
STK25	protein_coding	ENSG00000115694	/	/	/	0	0	/
PLEKHB2	protein_coding	ENSG00000115762	/	/	/	0	0	/
AAK1	protein_coding	ENSG00000115977	/	/	/	0	0	/
PLEKHA3	protein_coding	ENSG00000116095	ENST00000234453	1,2,3,4,5,7,8	0.875	7	859	/
FARSB	protein_coding	ENSG00000116120	ENST00000281828	5,6,7,12,17	0.294118	5	660	Brain calcification Rajab type/RAJAB INTERSTITIAL LUNG DISEASE WITH BRAIN CALCIFICATIONS
ALMS1	protein_coding	ENSG00000116127	ENST00000613296	18,19,20,21,22	0.217391	5	815	Alstrom syndrome
MARK1	protein_coding	ENSG00000116141	/	/	/	0	0	/
CACYBP	protein_coding	ENSG00000116161	/	/	/	0	0	/
RALGPS2	protein_coding	ENSG00000116191	/	/	/	0	0	/
MRPL37	protein_coding	ENSG00000116221	ENST00000605337	2.5	0.285714	2	231	/
RAP1A	protein_coding	ENSG00000116473	ENST00000369709	6.7	0.25	2	231	Kabuki syndrome
HDAC1	protein_coding	ENSG00000116478	ENST00000373548	9,10,11	0.214286	3	351	/
SCAMP3	protein_coding	ENSG00000116521	/	/	/	0	0	/
GON4L	protein_coding	ENSG00000116580	ENST00000368331	17,21,25,30,31,32	0.1875	13	2123	Autosomal Recessive Mental Retardation
KIAA2013	protein_coding	ENSG00000116685	ENST00000376572	1.2	0.666667	5	332	/
PRAMEF1	protein_coding	ENSG00000116721	ENST00000332296	7	0.25	1	102	/
BCAS2	protein_coding	ENSG00000116752	/	/	/	0	0	/
CFHR3	protein_coding	ENSG00000116785	ENST00000367425	5	0.166667	1	183	Atypical hemolytic-uremic syndrome with anti-factor H antibodies/HEMOLYTIC UREMIC SYNDROME ATYPICAL SUSCEPTIBILITY TO 1/MACULAR DEGENERATION AGE-RELATED 1
BMP8B	protein_coding	ENSG00000116985	ENST00000372827	2,3,4	0.428571	3	534	/
ACADM	protein_coding	ENSG00000117054	/	/	/	0	0	Medium chain acyl-CoA dehydrogenase deficiency/ACYL-CoA DEHYDROGENASE MEDIUM-CHAIN DEFICIENCY OF/Medium-chain acyl-coenzyme A dehydrogenase deficiency
ADGRL2	protein_coding	ENSG00000117114	/	/	/	0	0	/
GBP1	protein_coding	ENSG00000117228	ENST00000370473	2,3,4,5,7,8,9,10,11	0.818182	9	1443	/
GPR89A	protein_coding	ENSG00000117262	ENST00000313835	3,4,5,9,14	0.357143	7	468	/
CD46	protein_coding	ENSG00000117335	ENST00000322875	1,2,3,4,5	0.384615	7	673	Atypical hemolytic uremic syndrome with MCP/CD46 anomaly/HELLP syndrome/HEMOLYTIC UREMIC SYNDROME ATYPICAL SUSCEPTIBILITY TO 2
CDC20	protein_coding	ENSG00000117399	ENST00000372462	1,2,3,4,5,6,7,8,9,10	1	11	1500	/
PRDX1	protein_coding	ENSG00000117450	ENST00000262746	2,3,4,5,6	0.833333	8	600	METHYLMALONIC ACIDURIA AND HOMOCYSTINURIA cblC TYPE
FAAH	protein_coding	ENSG00000117480	/	/	/	0	0	POLYSUBSTANCE ABUSE SUSCEPTIBILITY TO
CNN3	protein_coding	ENSG00000117519	ENST00000370206	4,6,7	0.428571	4	567	/
PRRC2C	protein_coding	ENSG00000117523	ENST00000338920	34	0.0294118	1	171	/
RSRP1	protein_coding	ENSG00000117616	/	/	/	0	0	/
STMN1	protein_coding	ENSG00000117632	/	/	/	0	0	/
PPP1R8	protein_coding	ENSG00000117751	ENST00000311772	3,4,5,7	0.571429	7	865	/
OSBPL9	protein_coding	ENSG00000117859	/	/	/	0	0	/
MUC5B	protein_coding	ENSG00000117983	ENST00000529681	31	0.0204082	1	3797	Diffuse panbronchiolitis/Idiopathic pulmonary fibrosis/PULMONARY FIBROSIS IDIOPATHIC
STK11	protein_coding	ENSG00000118046	/	/	/	0	0	Peutz-Jeghers Syndrome/Pancreatic Cancer/TESTICULAR GERM CELL TUMOR
TREH	protein_coding	ENSG00000118094	ENST00000264029	11,12,13,14,16	0.333333	6	528	TREHALASE DEFICIENCY
RPS25	protein_coding	ENSG00000118181	ENST00000527673	3	0.2	1	184	/
MREG	protein_coding	ENSG00000118242	ENST00000263268	5	0.2	2	94	/
CREB1	protein_coding	ENSG00000118260	/	/	/	0	0	Melanoma of soft tissue/HISTIOCYTOMA ANGIOMATOID FIBROUS
KLF7	protein_coding	ENSG00000118263	ENST00000309446	1,2,3,4	1	12	909	/
SPCS2	protein_coding	ENSG00000118363	ENST00000263672	5	0.2	4	181	/
HMGN3	protein_coding	ENSG00000118418	ENST00000620514	5.7	0.285714	5	153	/
FOXO3	protein_coding	ENSG00000118689	ENST00000343882	3	0.25	2	787	/
TGIF2	protein_coding	ENSG00000118707	ENST00000373874	2.3	0.666667	4	396	/
MFSD1	protein_coding	ENSG00000118855	ENST00000622669	3,6,8,9,11,12,13,16	0.5	10	743	/
RAB3GAP2	protein_coding	ENSG00000118873	/	/	/	0	0	Autosomal recessive spastic paraplegia type 69/Cataract-intellectual disability-hypogonadism syndrome/Micro syndrome/MARTSOLF SYNDROME/WARBURG MICRO SYNDROME 2
CCND2	protein_coding	ENSG00000118971	ENST00000261254	2.3	0.4	2	319	Megalencephaly-polymicrogyria-postaxial polydactyly-hydrocephalus syndrome/Megalencephaly-polymicrogyria-polydactyly-hydrocephalus syndrome 3/MEGALENCEPHALY-POLYMICROGYRIA-POLYDACTYLY-HYDROCEPHALUS SYNDROME
OTUD4P1	processed_pseudogene	ENSG00000118976	/	/	/	0	0	/
ELL2	protein_coding	ENSG00000118985	ENST00000237853	1	0.0833333	1	92	/
ABITRAM	protein_coding	ENSG00000119328	ENST00000322940	3.6	0.333333	2	268	/
LCN1P1	unprocessed_pseudogene	ENSG00000119440	/	/	/	0	0	/
FCF1	protein_coding	ENSG00000119616	/	/	/	0	0	/
NEK9	protein_coding	ENSG00000119638	/	/	/	0	0	NEK9-related lethal skeletal dysplasia/Nevus comedonicus syndrome/ARTHROGRYPOSIS PERTHES DISEASE AND UPWARD GAZE PALSY/LETHAL CONGENITAL CONTRACTURE SYNDROME 10/NEVUS COMEDONICUS/NEPHRONOPHTHISIS 9/RENAL-HEPATIC-PANCREATIC DYSPLASIA 2
NPC2	protein_coding	ENSG00000119655	/	/	/	0	0	Niemann-Pick disease type C adult neurologic onset/Niemann-Pick disease type C juvenile neurologic onset/Niemann-Pick disease type C late infantile neurologic onset/Niemann-Pick disease type C severe early infantile neurologic onset/Niemann-Pick disease type C severe perinatal form/NIEMANN-PICK DISEASE TYPE C2
ACOT2	protein_coding	ENSG00000119673	ENST00000238651	3	0.333333	2	606	/
DLST	protein_coding	ENSG00000119689	ENST00000334220	7,8,10,11,14,15	0.4	7	797	/
FKBP1B	protein_coding	ENSG00000119782	ENST00000380986	4	0.25	2	60	/
FAM45A	protein_coding	ENSG00000119979	ENST00000361432	9	0.111111	2	167	/
MSX2	protein_coding	ENSG00000120149	ENST00000239243	1.2	1	3	787	Craniosynostosis Boston type/Enlarged parietal foramina/Parietal foramina with clavicular hypoplasia/CRANIOSYNOSTOSIS 2/PARIETAL FORAMINA 1/PARIETAL FORAMINA WITH CLEIDOCRANIAL DYSPLASIA/CRANIOSYNOSTOSIS TYPE 2/Enlarged Parietal Foramina/Cranium Bifidum
RCL1	protein_coding	ENSG00000120158	/	/	/	0	0	/
WDR55	protein_coding	ENSG00000120314	/	/	/	0	0	/
PCDHB8	protein_coding	ENSG00000120322	ENST00000239444	1	1	1	1153	/
PCDHB10	protein_coding	ENSG00000120324	ENST00000239446	1	1	1	292	/
MSANTD2	protein_coding	ENSG00000120458	ENST00000374979	2.4	0.5	6	1099	/
LYZL1	protein_coding	ENSG00000120563	ENST00000375500	2	0.2	2	164	/
MRC1	protein_coding	ENSG00000120586	/	/	/	29	4185	/
IQSEC3	protein_coding	ENSG00000120645	ENST00000538872	1	0.0714286	1	273	/
TAF12	protein_coding	ENSG00000120656	/	/	/	0	0	/
ELF1	protein_coding	ENSG00000120690	/	/	/	0	0	/
KBTBD7	protein_coding	ENSG00000120696	ENST00000379483	1	1	1	1275	/
SERP1	protein_coding	ENSG00000120742	/	/	/	0	0	/
TMPO	protein_coding	ENSG00000120802	/	/	/	0	0	Familial isolated dilated cardiomyopathy
SOCS2	protein_coding	ENSG00000120833	/	/	/	0	0	/
TARDBP	protein_coding	ENSG00000120948	/	/	/	5	98	Amyotrophic lateral sclerosis/Frontotemporal dementia with motor neuron disease/AMYOTROPHIC LATERAL SCLEROSIS 10 WITH OR WITHOUT FRONTOTEMPORAL DEMENTIA
COPS5	protein_coding	ENSG00000121022	ENST00000357849	1,2,3,8	0.5	5	585	/
LRAT	protein_coding	ENSG00000121207	/	/	/	0	0	Leber congenital amaurosis/Retinitis pigmentosa/Severe early-childhood-onset retinal dystrophy/LEBER CONGENITAL AMAUROSIS 14
PRB2	protein_coding	ENSG00000121335	ENST00000389362	1.3	0.5	2	1215	/
PYROXD1	protein_coding	ENSG00000121350	/	/	/	0	0	MYOPATHY MYOFIBRILLAR 8/Early-Onset Myopathy with Internalized Nuclei and Myofibrillar Disorganization
PSPC1	protein_coding	ENSG00000121390	ENST00000338910	4,5,8,9	0.444444	5	595	/
RNF2	protein_coding	ENSG00000121481	ENST00000367510	3,4,5,6,7	0.714286	6	920	/
POPDC2	protein_coding	ENSG00000121577	/	/	/	0	0	/
ZMYM2	protein_coding	ENSG00000121741	/	/	/	0	0	/
FABP3	protein_coding	ENSG00000121769	ENST00000373713	2	0.25	1	173	/
PIK3CA	protein_coding	ENSG00000121879	ENST00000263967	12.13	0.0952381	2	269	Adult hepatocellular carcinoma/CLOVES syndrome/COWDEN SYNDROME/Hemihyperplasia-multiple lipomatosis syndrome/Hemimegalencephaly/Lynch syndrome/Macrodactyly of fingers unilateral/Macrodactyly of toes unilateral/Megalencephaly-capillary malformation-polymicrogyria syndrome/Segmental progressive overgrowth syndrome with fibroadipose hyperplasia/Breast Cancer/CAPILLARY MALFORMATION OF THE LOWER LIP L…
FYTTD1	protein_coding	ENSG00000122068	ENST00000241502	3,4,9	0.333333	5	227	/
PAEP	protein_coding	ENSG00000122133	ENST00000479141	1.2	0.285714	5	193	/
OBP2A	protein_coding	ENSG00000122136	ENST00000340780	1,2,3	0.428571	5	277	/
PLG	protein_coding	ENSG00000122194	ENST00000308192	19	0.0526316	1	162	Hypoplasminogenemia/Ligneous conjunctivitis/PLASMINOGEN DEFICIENCY TYPE I LIGNEOUS CONJUNCTIVITIS INCLUDED
SHLD2	protein_coding	ENSG00000122376	ENST00000298786	5,6,7,8,9	0.5	5	13	/
PRXL2A	protein_coding	ENSG00000122378	/	/	/	0	0	/
RPAP2	protein_coding	ENSG00000122484	ENST00000610020	4.8	0.153846	2	1019	/
PMS2	protein_coding	ENSG00000122512	ENST00000265849	11,13,14,15	0.266667	8	983	Constitutional mismatch repair deficiency syndrome/Lynch syndrome/COLORECTAL CANCER HEREDITARY NONPOLYPOSIS TYPE 4/MISMATCH REPAIR CANCER SYNDROME
OCM	protein_coding	ENSG00000122543	ENST00000242104	3.4	0.5	3	136	/
2007-09-01	protein_coding	ENSG00000122545	ENST00000435235	5.11	0.166667	2	143	/
HNRNPA2B1	protein_coding	ENSG00000122566	/	/	/	0	0	Inclusion body myopathy with Paget disease of bone and frontotemporal dementia/INCLUSION BODY MYOPATHY WITH EARLY-ONSET PAGET DISEASE WITH OR WITHOUTFRONTOTEMPORAL DEMENTIA 2
FKBP9	protein_coding	ENSG00000122642	ENST00000538336	3,4,5,6,7,8,9,10,11	0.818182	11	1499	/
NT5C3A	protein_coding	ENSG00000122643	ENST00000610140	1,2,6,7,8,9	0.666667	9	803	Hemolytic anemia due to pyrimidine 5' nucleotidase deficiency/Uridine 5-prime monophosphate hydrolase deficiency hemolytic anemia due to/HEMOLYTIC ANEMIA DUE TO UMPH1 DEFICIENCY
CCZ1	protein_coding	ENSG00000122674	ENST00000325974	2,3,4,5,7,8,9,10,11,12,13,14,15	0.866667	14	1245	/
SLC25A51	protein_coding	ENSG00000122696	/	/	/	0	0	/
AKR1D1	protein_coding	ENSG00000122787	ENST00000242375	2,5,6,7	0.444444	4	453	Congenital bile acid synthesis defect type 2/BILE ACID SYNTHESIS DEFECT CONGENITAL 2
NUDT10	protein_coding	ENSG00000122824	ENST00000376006	2	0.333333	3	998	/
SFTPA1	protein_coding	ENSG00000122852	ENST00000419470	2,3,4,5,6	0.833333	7	757	Idiopathic pulmonary fibrosis
CISD1	protein_coding	ENSG00000122873	ENST00000333926	2.3	0.666667	2	296	/
ECD	protein_coding	ENSG00000122882	/	/	/	0	0	/
VPS26A	protein_coding	ENSG00000122958	ENST00000263559	2,4,5,6,8,9	0.666667	15	836	/
NME2P1	processed_pseudogene	ENSG00000123009	/	/	/	0	0	/
RNF11	protein_coding	ENSG00000123091	ENST00000242719	2.3	0.666667	2	236	/
WWP1	protein_coding	ENSG00000123124	ENST00000517970	3,4,5,6,8,9,10,11,14,18,19,20,21,22,23,25	0.64	18	2252	/
DDX39A	protein_coding	ENSG00000123136	ENST00000242776	4	0.0909091	1	93	/
ADGRE5	protein_coding	ENSG00000123146	ENST00000242786	2,3,7,8,9	0.25	5	440	/
SPRYD7	protein_coding	ENSG00000123178	ENST00000361840	5	0.2	3	73	/
ATF1	protein_coding	ENSG00000123268	ENST00000262053	7	0.142857	1	71	Melanoma of soft tissue
SMUG1	protein_coding	ENSG00000123415	ENST00000508394	2.3	0.666667	7	373	/
TUBA1B	protein_coding	ENSG00000123416	ENST00000336023	4	0.25	1	745	/
TYRL	unprocessed_pseudogene	ENSG00000123447	/	/	/	0	0	/
AMD1	protein_coding	ENSG00000123505	/	/	/	0	0	/
SERPINA7	protein_coding	ENSG00000123561	ENST00000327674	1	0.25	2	94	THYROXINE-BINDING GLOBULIN QUANTITATIVE TRAIT LOCUS
MORF4L2	protein_coding	ENSG00000123562	ENST00000422154	4	0.25	5	833	/
MAGEA9B	protein_coding	ENSG00000123584	ENST00000243314	4	0.25	1	948	/
METTL8	protein_coding	ENSG00000123600	ENST00000612742	7,8,10	0.3	4	438	/
ACSL3	protein_coding	ENSG00000123983	/	/	/	0	0	/
SDC4	protein_coding	ENSG00000124145	/	/	/	0	0	/
SNAI1	protein_coding	ENSG00000124216	ENST00000244050	2.3	0.666667	2	388	/
VAMP7	protein_coding	ENSG00000124333	ENST00000262640	2,3,4,5,6,7	0.857143	11	1702	46XY partial gonadal dysgenesis
IL9R	protein_coding	ENSG00000124334	ENST00000244174	1,2,3,4,5,6,8,9	0.888889	13	3000	/
XG	protein_coding	ENSG00000124343	ENST00000644266	1,2,3	0.272727	4	127	/
PSG8	protein_coding	ENSG00000124467	ENST00000306511	4.5	0.4	3	451	/
RPS10	protein_coding	ENSG00000124614	/	/	/	0	0	Blackfan-Diamond anemia/DIAMOND-BLACKFAN ANEMIA 9
MOCS1	protein_coding	ENSG00000124615	ENST00000340692	2,4,6,7,8,9,11	0.636364	8	1510	Sulfite oxidase deficiency due to molybdenum cofactor deficiency type A/MOLYBDENUM COFACTOR DEFICIENCY COMPLEMENTATION GROUP A/Molybdenum Cofactor Deficiency
EEF1E1	protein_coding	ENSG00000124802	ENST00000379715	2,3,4	0.75	4	404	/
LRRFIP1	protein_coding	ENSG00000124831	ENST00000392000	1,6,8,9,10,11	0.545455	10	2136	/
BBS2	protein_coding	ENSG00000125124	/	/	/	0	0	Bardet-Biedl syndrome/Retinitis pigmentosa/BARDET-BIEDL SYNDROME 2/RETINITIS PIGMENTOSA 74/BARDET-BIEDL SYNDROME TYPE 2
DOK4	protein_coding	ENSG00000125170	/	/	/	0	0	/
MYH2	protein_coding	ENSG00000125414	ENST00000397183	23	0.025	1	132	Childhood-onset autosomal recessive myopathy with external ophthalmoplegia/Hereditary inclusion body myopathy-joint contractures-ophthalmoplegia syndrome/MYOPATHY PROXIMAL AND OPHTHALMOPLEGIA
HS3ST3B1	protein_coding	ENSG00000125430	ENST00000360954	2	0.5	1	522	/
MSTO1	protein_coding	ENSG00000125459	ENST00000245564	1,2,3,4,5,6,7,8,9,12,13,14	0.857143	20	1391	Mitochondrial myopathy-cerebellar ataxia-pigmentary retinopathy syndrome/MYOPATHY MITOCHONDRIAL AND ATAXIA
KIR2DL1	protein_coding	ENSG00000125498	ENST00000336077	2.6	0.25	2	138	/
PLGLB2	protein_coding	ENSG00000125551	ENST00000359481	2	0.25	1	136	/
THOC2	protein_coding	ENSG00000125676	/	/	/	0	0	X-linked intellectual disability-short stature-overweight syndrome/MENTAL RETARDATION X-LINKED 12
C3	protein_coding	ENSG00000125730	/	/	/	0	0	Atypical hemolytic uremic syndrome with C3 anomaly/Complement component 3 deficiency/COMPLEMENT COMPONENT 3 DEFICIENCY AUTOSOMAL RECESSIVE/HEMOLYTIC UREMIC SYNDROME ATYPICAL SUSCEPTIBILITY TO 5/MACULAR DEGENERATION AGE-RELATED 9
SNRPB	protein_coding	ENSG00000125835	ENST00000438552	7	0.142857	2	49	Cerebro-costo-mandibular syndrome
OVOL2	protein_coding	ENSG00000125850	/	/	/	0	0	Congenital hereditary endothelial dystrophy type I/Posterior polymorphous corneal dystrophy/CORNEAL DYSTROPHY POSTERIOR POLYMORPHOUS 1
PCSK2	protein_coding	ENSG00000125851	/	/	/	0	0	/
HNRNPR	protein_coding	ENSG00000125944	ENST00000374616	10.11	0.181818	6	385	/
ST3GAL3	protein_coding	ENSG00000126091	/	/	/	0	0	Autosomal recessive non-syndromic intellectual disability/West syndrome/EPILEPTIC ENCEPHALOPATHY EARLY INFANTILE 15/MENTAL RETARDATION AUTOSOMAL RECESSIVE 12
TUBGCP3	protein_coding	ENSG00000126216	ENST00000261965	22	0.0454545	1	159	/
GPR42	protein_coding	ENSG00000126251	ENST00000597214	1	1	2	1041	/
FRMD8	protein_coding	ENSG00000126391	ENST00000317568	3,4,6,7,8,9,10,11	0.727273	10	1251	/
BCL2L12	protein_coding	ENSG00000126453	ENST00000616144	2,3,6	0.428571	7	531	/
PRMT1	protein_coding	ENSG00000126457	ENST00000454376	3,4,6,8,9,10,11	0.636364	9	817	/
ASL	protein_coding	ENSG00000126522	ENST00000304874	3,4,5,6,7,16,17	0.411765	10	625	ARGININOSUCCINIC ACIDURIA/Argininosuccinate Lyase Deficiency
SBDS	protein_coding	ENSG00000126524	ENST00000246868	1,2,3,4,5	1	9	754	Idiopathic aplastic anemia/SHWACHMAN-DIAMOND SYNDROME/APLASTIC ANEMIA APLASTIC ANEMIA SUSCEPTIBILITY TO INCLUDED/SHWACHMAN-DIAMOND SYNDROME 1
STAT5A	protein_coding	ENSG00000126561	ENST00000345506	7,8,9,10	0.2	4	569	/
NSRP1	protein_coding	ENSG00000126653	ENST00000247026	4,5,6,7	0.571429	5	1506	/
DNAJC8	protein_coding	ENSG00000126698	ENST00000263697	5,7,9	0.333333	3	310	/
ELK1	protein_coding	ENSG00000126767	ENST00000376983	3.4	0.285714	2	226	/
TIMM17B	protein_coding	ENSG00000126768	ENST00000396779	6,7,8	0.375	5	329	/
PCNX4	protein_coding	ENSG00000126773	/	/	/	0	0	/
DLGAP5	protein_coding	ENSG00000126787	ENST00000247191	17	0.0526316	1	114	/
PRDM7	protein_coding	ENSG00000126856	/	/	/	0	0	/
RHOT1	protein_coding	ENSG00000126858	/	/	/	0	0	/
NXF5	protein_coding	ENSG00000126952	ENST00000473265	4,5,6,7,8	0.333333	5	453	/
TIMM8A	protein_coding	ENSG00000126953	ENST00000372902	1.2	1	2	294	MOHR-TRANEBJAERG SYNDROME/JENSEN SYNDROME
IPPK	protein_coding	ENSG00000127080	ENST00000287996	3,5,13	0.230769	4	444	/
COX7C	protein_coding	ENSG00000127184	ENST00000509578	1.2	1	7	198	/
RAP1B	protein_coding	ENSG00000127314	/	/	/	0	0	Kabuki syndrome
PIN1	protein_coding	ENSG00000127445	ENST00000247970	2,3,4	0.75	5	442	/
ADGRE2	protein_coding	ENSG00000127507	ENST00000315576	3,4,8,9,10,15	0.285714	6	547	VIBRATORY URTICARIA
SLC35E1	protein_coding	ENSG00000127526	ENST00000595753	1,4,5,6	0.666667	4	696	/
OR1E2	protein_coding	ENSG00000127780	ENST00000248384	1	1	1	143	/
PNKD	protein_coding	ENSG00000127838	ENST00000273077	2	0.1	2	362	Paroxysmal non-kinesigenic dyskinesia/PAROXYSMAL NONKINESIGENIC DYSKINESIA 1
RNF6	protein_coding	ENSG00000127870	/	/	/	0	0	Squamous cell carcinoma of the esophagus/ESOPHAGEAL CANCER ESOPHAGEAL SQUAMOUS CELL CARCINOMA SUSCEPTIBILITY TO INCLUDED
SEM1	protein_coding	ENSG00000127922	/	/	/	2	137	Isolated split hand-split foot malformation
PMS2P3	transcribed_unprocessed_pseudogene	ENSG00000127957	/	/	/	0	0	/
PEX1	protein_coding	ENSG00000127980	/	/	/	0	0	Deafness-enamel hypoplasia-nail defects syndrome/Infantile Refsum disease/NEONATAL ADRENOLEUKODYSTROPHY/Zellweger Syndrome/HEIMLER SYNDROME 1/PEROXISOME BIOGENESIS DISORDER 1A (ZELLWEGER)/PEROXISOME BIOGENESIS DISORDER 1B/ADRENOLEUKODYSTROPHY NEONATAL/PEROXISOME BIOGENESIS DISORDER COMPLEMENTATION GROUP 1
RBM48	protein_coding	ENSG00000127993	ENST00000265732	1,2,3,4,5	1	7	1111	/
SRD5A3	protein_coding	ENSG00000128039	ENST00000264228	2,3,4,5	0.8	4	736	SRD5A3-CDG/CONGENITAL DISORDER OF GLYCOSYLATION TYPE Iq/KAHRIZI SYNDROME/Congenital Disorders of Glycosylation
PAICS	protein_coding	ENSG00000128050	/	/	/	0	0	/
PPAT	protein_coding	ENSG00000128059	ENST00000264220	11	0.0909091	1	100	/
TPST2	protein_coding	ENSG00000128294	ENST00000338754	3.4	0.285714	2	240	/
APOBEC3A	protein_coding	ENSG00000128383	ENST00000402255	4.6	0.333333	5	325	/
APOBEC3F	protein_coding	ENSG00000128394	ENST00000308521	2,3,4,6	0.571429	4	787	/
SPECC1	protein_coding	ENSG00000128487	ENST00000261503	5,6,7,12,15	0.333333	11	466	/
PRKRIP1	protein_coding	ENSG00000128563	/	/	/	1	34	/
FLNC	protein_coding	ENSG00000128591	ENST00000325888	47.48	0.0416667	3	398	Distal myopathy with posterior leg and anterior hand involvement/Familial isolated restrictive cardiomyopathy/Muscle filaminopathy/Cardiomyopathy familial hypertrophic 26/MYOPATHY DISTAL 4/MYOPATHY MYOFIBRILLAR 5
NDUFA5	protein_coding	ENSG00000128609	/	/	/	0	0	/
HERC2	protein_coding	ENSG00000128731	/	/	/	0	0	Developmental delay with autism spectrum disorder and gait instability/Mental retardation autosomal recessive 38/PRADER-WILLI SYNDROME/SKIN/HAIR/EYE PIGMENTATION VARIATION IN 1
ACKR4	protein_coding	ENSG00000129048	ENST00000249887	2	0.5	1	1053	/
LRRC6	protein_coding	ENSG00000129295	/	/	/	0	0	Primary ciliary dyskinesia/CILIARY DYSKINESIA PRIMARY 19/Primary ciliary diskinesia
SNX6	protein_coding	ENSG00000129515	ENST00000652385	3,4,5,6,7,8,12,14	0.571429	11	878	/
EGLN3	protein_coding	ENSG00000129521	/	/	/	0	0	/
REEP5	protein_coding	ENSG00000129625	/	/	/	0	0	/
SEC14L1	protein_coding	ENSG00000129657	/	/	/	0	0	/
ASH2L	protein_coding	ENSG00000129691	/	/	/	0	0	/
VCY1B	protein_coding	ENSG00000129862	ENST00000250823	1.2	1	2	378	SPERMATOGENIC FAILURE Y-LINKED 2
VCY	protein_coding	ENSG00000129864	ENST00000250825	1.2	1	2	378	SPERMATOGENIC FAILURE Y-LINKED 2
PUDP	protein_coding	ENSG00000130021	/	/	/	0	0	/
GALNT8	protein_coding	ENSG00000130035	/	/	/	1	126	/
KCNA5	protein_coding	ENSG00000130037	ENST00000252321	1	1	1	119	Familial atrial fibrillation/ATRIAL FIBRILLATION FAMILIAL 7
GNL3L	protein_coding	ENSG00000130119	ENST00000360845	4,5,7,8,11,12,13,14,15,16	0.625	11	1183	/
APOC1	protein_coding	ENSG00000130208	ENST00000588750	3,4,5	0.6	10	335	/
SAFB2	protein_coding	ENSG00000130254	ENST00000252542	7	0.047619	1	511	/
NSUN5	protein_coding	ENSG00000130305	/	/	/	0	0	/
TULP4	protein_coding	ENSG00000130338	/	/	/	0	0	/
FUT5	protein_coding	ENSG00000130383	ENST00000588525	2	0.5	2	619	/
STK33	protein_coding	ENSG00000130413	/	/	/	0	0	/
CRB3	protein_coding	ENSG00000130545	ENST00000356762	4.5	0.4	4	158	/
CYP2G1P	translated_unprocessed_pseudogene	ENSG00000130612	/	/	/	0	0	/
HBZ	protein_coding	ENSG00000130656	ENST00000252951	1,2,3	1	3	429	/
UBE2M	protein_coding	ENSG00000130725	ENST00000253023	1,2,4,6	0.666667	4	449	/
ZNF317	protein_coding	ENSG00000130803	ENST00000247956	7	0.142857	2	1062	/
PLXNA3	protein_coding	ENSG00000130827	/	/	/	0	0	/
NUTM2F	protein_coding	ENSG00000130950	ENST00000253262	1,2,6,7	0.571429	4	1616	/
FBP2	protein_coding	ENSG00000130957	ENST00000375337	4.5	0.285714	2	217	/
TTTY9B	lncRNA	ENSG00000131007	/	/	/	0	0	/
ULBP2	protein_coding	ENSG00000131015	ENST00000367351	2,3,4	0.6	3	656	/
LILRB2	protein_coding	ENSG00000131042	ENST00000391749	12,13,14,15	0.285714	6	290	/
C1QL1	protein_coding	ENSG00000131094	ENST00000253407	1	0.5	1	110	/
ATP6V1E1	protein_coding	ENSG00000131100	ENST00000253413	3,7,9	0.333333	5	268	Autosomal recessive cutis laxa type 2 classic type/CUTIS LAXA AUTOSOMAL RECESSIVE TYPE IIC/Mutations in ATP6V1E1 or ATP6V1A Cause Autosomal Recessive Cutis Laxa
CHMP1A	protein_coding	ENSG00000131165	ENST00000397901	6	0.142857	1	118	Pontocerebellar hypoplasia type 8/PONTOCEREBELLAR HYPOPLASIA TYPE 8/Pontocerebellar hypoplasia and microcephaly
COX7B	protein_coding	ENSG00000131174	ENST00000650309	2	0.333333	4	130	MICROPHTHALMIA WITH LINEAR SKIN DEFECTS SYNDROME/LINEAR SKIN DEFECTS WITH MULTIPLE CONGENITAL ANOMALIES 1/LINEAR SKIN DEFECTS WITH MULTIPLE CONGENITAL ANOMALIES 2/Microphthalmia with Linear Skin Lesions
CAP1	protein_coding	ENSG00000131236	ENST00000372797	2,3,5,7,8,9,10,12,13	0.692308	16	1040	/
PPT1	protein_coding	ENSG00000131238	/	/	/	0	0	CLN1 disease/CEROID LIPOFUSCINOSIS NEURONAL 1/NEURONAL CEROID LIPOFUSCINOSIS TYPE 1
ADGRE3	protein_coding	ENSG00000131355	ENST00000253673	10	0.0625	1	127	/
RFTN1	protein_coding	ENSG00000131378	ENST00000334133	3,4,5,6,7	0.5	5	938	/
SLC6A6	protein_coding	ENSG00000131389	ENST00000613060	10,11,12,13,16,18,20,21,22	0.6	12	1297	/
KIF3A	protein_coding	ENSG00000131437	ENST00000403231	8.13	0.105263	2	286	/
TUBG1	protein_coding	ENSG00000131462	ENST00000251413	1,2,3,6,8,9,10,11	0.727273	8	1120	Cortical dysplasia complex with other brain malformations 4/Posteriorly predominant pachygyria and severe microcephaly
AOC3	protein_coding	ENSG00000131471	ENST00000308423	1.4	0.5	6	968	/
VPS25	protein_coding	ENSG00000131475	/	/	/	0	0	/
RHOXF2	protein_coding	ENSG00000131721	ENST00000371388	4	0.25	1	330	/
KRT33B	protein_coding	ENSG00000131738	ENST00000251646	4.5	0.285714	2	288	/
FMO5	protein_coding	ENSG00000131781	/	/	/	0	0	/
LIN28A	protein_coding	ENSG00000131914	/	/	/	0	0	/
RHPN2	protein_coding	ENSG00000131941	ENST00000254260	15	0.0666667	1	261	/
DNAJB1	protein_coding	ENSG00000132002	ENST00000254322	1,2,3	1	5	1023	Fibrolamellar hepatocellular carcinoma
SPATA6	protein_coding	ENSG00000132122	/	/	/	0	0	/
RAF1	protein_coding	ENSG00000132155	ENST00000442415	4.13	0.111111	2	230	Familial isolated dilated cardiomyopathy/Noonan Syndrome/Noonan syndrome with multiple lentigines/Pilomyxoid astrocytoma/Cardiomyopathy dilated 1nn/LEOPARD SYNDROME 2/NOONAN SYNDROME 5
NUP210	protein_coding	ENSG00000132182	ENST00000254508	2,5,9,10,11,21,25,27	0.2	8	782	/
HSD17B7	protein_coding	ENSG00000132196	ENST00000254521	1,2,3,4,5,6,7,8	0.888889	11	242	/
SLX1A	protein_coding	ENSG00000132207	ENST00000251303	1,2,3,4,5,6	1	7	828	/
IMMT	protein_coding	ENSG00000132305	ENST00000410111	3,4,5,6,7,8,10,12,13,14,15	0.733333	18	1975	/
CLUH	protein_coding	ENSG00000132361	ENST00000570628	22.24	0.0769231	2	234	/
RPA1	protein_coding	ENSG00000132383	/	/	/	0	0	/
UBE2G1	protein_coding	ENSG00000132388	/	/	/	0	0	/
JCHAIN	protein_coding	ENSG00000132465	ENST00000543780	4	0.25	3	198	/
WBP2	protein_coding	ENSG00000132471	ENST00000591399	7	0.111111	3	100	Autosomal recessive non-syndromic sensorineural deafness type DFNB/DEAFNESS AUTOSOMAL RECESSIVE 107
ANKRD20A3	protein_coding	ENSG00000132498	/	/	/	2	289	/
NXT1	protein_coding	ENSG00000132661	ENST00000254998	2	0.5	1	337	/
DAP3	protein_coding	ENSG00000132676	ENST00000368336	6.13	0.153846	4	109	/
CRP	protein_coding	ENSG00000132693	ENST00000255030	2	0.5	1	144	/
MMACHC	protein_coding	ENSG00000132763	/	/	/	0	0	Methylmalonic acidemia with homocystinuria type cblC/METHYLMALONIC ACIDURIA AND HOMOCYSTINURIA cblC TYPE
PATJ	protein_coding	ENSG00000132849	/	/	/	0	0	/
ATP8A2	protein_coding	ENSG00000132932	/	/	/	0	0	Dysequilibrium syndrome/Cerebellar ataxia mental retardation and dysequilibrium syndrome 4
TPTE2	protein_coding	ENSG00000132958	/	/	/	0	0	/
CDK8	protein_coding	ENSG00000132964	ENST00000381527	7,12,13	0.230769	3	429	/
MYH8	protein_coding	ENSG00000133020	ENST00000403437	4.5	0.05	2	155	Carney complex-trismus-pseudocamptodactyly syndrome/Trismus-pseudocamptodactyly syndrome/ARTHROGRYPOSIS DISTAL TYPE 7/CARNEY COMPLEX VARIANT/DISTAL ARTHROGRYPOSIS TYPE
MPRIP	protein_coding	ENSG00000133030	ENST00000395811	1,4,6,7,8,9,12,13,14	0.391304	12	1698	/
EPSTI1	protein_coding	ENSG00000133106	/	/	/	0	0	/
GPALPP1	protein_coding	ENSG00000133114	/	/	/	0	0	/
RFC3	protein_coding	ENSG00000133119	ENST00000380071	2,5,6	0.333333	3	398	/
SRRM1	protein_coding	ENSG00000133226	/	/	/	0	0	/
CSNK1G2	protein_coding	ENSG00000133275	/	/	/	0	0	/
RTN3	protein_coding	ENSG00000133318	ENST00000377819	1,4,5,9	0.444444	13	725	/
GSTT2B	protein_coding	ENSG00000133433	ENST00000290765	1,2,3,4,5	1	8	661	/
GGT2	protein_coding	ENSG00000133475	ENST00000401924	5,6,11,12,13,14	0.4	7	761	/
ZDHHC8P1	transcribed_unprocessed_pseudogene	ENSG00000133519	/	/	/	0	0	/
ACTR3B	protein_coding	ENSG00000133627	ENST00000256001	2,4,5,6,7,9	0.5	7	608	/
BTG1	protein_coding	ENSG00000133639	ENST00000256015	1.2	1	2	464	/
KRAS	protein_coding	ENSG00000133703	ENST00000256078	3.4	0.333333	4	340	CARDIOFACIOCUTANEOUS SYNDROME/Differentiated thyroid carcinoma/Encephalocraniocutaneous lipomatosis/Familial pancreatic carcinoma/Juvenile myelomonocytic leukemia/Linear nevus sebaceus syndrome/Lynch syndrome/Noonan Syndrome/Pilomyxoid astrocytoma/RAS-associated autoimmune leukoproliferative disease/Selection of therapeutic option in colorectal cancer/Selection of therapeutic option in non-small …
IMPA1	protein_coding	ENSG00000133731	ENST00000449740	2,3,4,5,6,7,9	0.7	9	743	MENTAL RETARDATION AUTOSOMAL RECESSIVE 59
ADAM20	protein_coding	ENSG00000134007	/	/	/	0	0	/
CDK7	protein_coding	ENSG00000134058	ENST00000256443	6,7,8,10,11,12	0.5	9	657	/
THUMPD3	protein_coding	ENSG00000134077	ENST00000345094	2,4,7,8,9,10	0.6	7	705	/
CNTN6	protein_coding	ENSG00000134115	/	/	/	0	0	/
DPH6	protein_coding	ENSG00000134146	/	/	/	0	0	/
GSTM1	protein_coding	ENSG00000134184	/	/	/	0	0	/
GSTM5	protein_coding	ENSG00000134201	ENST00000256593	6.8	0.25	3	186	/
CHIA	protein_coding	ENSG00000134216	ENST00000369740	8	0.0833333	1	68	/
LAMTOR5	protein_coding	ENSG00000134248	ENST00000256644	3.4	0.5	4	179	/
NOTCH2	protein_coding	ENSG00000134250	ENST00000256646	1,2,3,7,10	0.147059	8	641	Acroosteolysis dominant type/Alagille syndrome due to a NOTCH2 point mutation/Alagille syndrome 2/Hajdu-Cheney syndrome
PLEKHA8P1	transcribed_processed_pseudogene	ENSG00000134297	/	/	/	0	0	/
SAA2	protein_coding	ENSG00000134339	ENST00000526900	3	0.25	1	139	/
IL6ST	protein_coding	ENSG00000134352	ENST00000381298	4,5,6,17	0.235294	10	1332	/
CFHR4	protein_coding	ENSG00000134365	ENST00000367416	8.9	0.2	2	360	Atypical hemolytic-uremic syndrome with anti-factor H antibodies
CCNH	protein_coding	ENSG00000134480	ENST00000651575	4,5,7	0.333333	4	396	/
KCTD1	protein_coding	ENSG00000134504	/	/	/	0	0	Scalp ear nipple syndrome
SOX5	protein_coding	ENSG00000134532	ENST00000451604	10,11,12,13,14,15	0.4	12	1128	12p12,1 microdeletion syndrome/Developmental and speech delay due to SOX5 deficiency/Lamb-shaffer syndrome/12p12,5 intragenic deletions associated with intellectual disability
RERG	protein_coding	ENSG00000134533	/	/	/	0	0	/
KLRC1	protein_coding	ENSG00000134545	/	/	/	1	548	/
PRH2	protein_coding	ENSG00000134551	ENST00000396400	2.3	0.5	3	437	/
FOLH1B	transcribed_unprocessed_pseudogene	ENSG00000134612	/	/	/	0	0	/
GNL2	protein_coding	ENSG00000134697	ENST00000373062	4,5,8,9,11,13,16	0.4375	7	867	/
FADS2	protein_coding	ENSG00000134824	/	/	/	0	0	/
OSTF1	protein_coding	ENSG00000134996	ENST00000346234	6.9	0.2	2	196	/
OCM2	protein_coding	ENSG00000135175	ENST00000257627	3.4	0.5	2	136	/
CCDC146	protein_coding	ENSG00000135205	ENST00000285871	2	0.0526316	1	156	/
CD36	protein_coding	ENSG00000135218	/	/	/	0	0	CORONARY HEART DISEASE SUSCEPTIBILITY TO 7/MALARIA SUSCEPTIBILITY TO MALARIA RESISTANCE TO INCLUDED/PLATELET GLYCOPROTEIN IV DEFICIENCY
UGT2A3	protein_coding	ENSG00000135220	ENST00000251566	1	0.166667	1	173	/
PNPLA8	protein_coding	ENSG00000135241	/	/	/	0	0	Mitochondrial myopathy with lactic acidosis
SRPK2	protein_coding	ENSG00000135250	ENST00000393651	3,4,7,8,10	0.3125	5	726	/
KHDC1	protein_coding	ENSG00000135314	ENST00000370384	3,4,5	0.6	8	497	/
AKIRIN2	protein_coding	ENSG00000135334	ENST00000257787	2,3,5	0.6	3	274	/
CDK4	protein_coding	ENSG00000135446	ENST00000257904	2.4	0.25	2	288	Dedifferentiated liposarcoma/Familial melanoma/Well-differentiated liposarcoma/MELANOMA CUTANEOUS MALIGNANT SUSCEPTIBILITY TO 3
ZC3H10	protein_coding	ENSG00000135482	/	/	/	0	0	/
LTV1	protein_coding	ENSG00000135521	ENST00000367576	10	0.0909091	1	106	/
PRADC1	protein_coding	ENSG00000135617	ENST00000258083	2,3,4,5	0.8	4	500	/
CPM	protein_coding	ENSG00000135678	/	/	/	0	0	/
EGLN1	protein_coding	ENSG00000135766	ENST00000366641	1,2,3,5	0.8	4	701	Autosomal dominant secondary polycythemia/ERYTHROCYTOSIS FAMILIAL 3/HEMOGLOBIN HIGH ALTITUDE ADAPTATION
DHX9	protein_coding	ENSG00000135829	ENST00000367549	2,3,4,5,6,8,9,10,12,13,15,16,17,18,20,21,22,23,24,25,26,27,28	0.821429	23	3530	/
EIF4E2	protein_coding	ENSG00000135930	/	/	/	0	0	/
CAB39	protein_coding	ENSG00000135932	ENST00000258418	5	0.111111	1	121	/
ANKRD36	protein_coding	ENSG00000135976	ENST00000652721	1,2,3,4,5,14,19,20,21,22,29,30,59,60,61,62,69	0.223684	23	1441	/
PCDH8	protein_coding	ENSG00000136099	ENST00000377942	1	0.333333	2	1456	/
CKAP2	protein_coding	ENSG00000136108	ENST00000378037	4,6,8	0.333333	4	583	/
THSD1	protein_coding	ENSG00000136114	ENST00000258613	5	0.2	2	457	Non-immune hydrops fetalis
SUCLA2	protein_coding	ENSG00000136143	/	/	/	0	0	Mitochondrial DNA depletion syndrome encephalomyopathic form with methylmalonic aciduria/Mitochondrial DNA depletion syndrome 5 (encephalomyopathic with or without methylmalonic aciduria)
ITM2B	protein_coding	ENSG00000136156	/	/	/	0	0	ABri amyloidosis/ADan amyloidosis/Retinal dystrophy with inner retinal dysfunction and ganglion cell anomalies/CEREBRAL AMYLOID ANGIOPATHY ITM2B-RELATED 1/CEREBRAL AMYLOID ANGIOPATHY ITM2B-RELATED 2/RETINAL DYSTROPHY WITH INNER RETINAL DYSFUNCTION AND GANGLION CELLABNORMALITIES
RCBTB2	protein_coding	ENSG00000136161	ENST00000430805	3,7,9,12,13,14	0.428571	7	641	/
SPDYE1	protein_coding	ENSG00000136206	ENST00000258704	5.6	0.285714	2	379	/
ZDHHC4	protein_coding	ENSG00000136247	ENST00000396706	6	0.125	1	126	/
ADAMTS7	protein_coding	ENSG00000136378	ENST00000388820	14	0.0416667	1	121	/
SRSF1	protein_coding	ENSG00000136450	/	/	/	0	0	/
VEZF1	protein_coding	ENSG00000136451	ENST00000581208	2,4,5,6	0.666667	6	1431	/
CSH1	protein_coding	ENSG00000136488	ENST00000316193	1,2,3,4,5	1	11	907	/
CBWD2	protein_coding	ENSG00000136682	ENST00000259199	3	0.0666667	1	97	/
CFC1	protein_coding	ENSG00000136698	ENST00000259216	1,2,3,4,5,6	1	10	691	Biliary atresia with splenic malformation syndrome/Congenitally uncorrected transposition of the great arteries with cardiac malformation/Congenitally uncorrected transposition of the great arteries with coarctation/Isolated congenitally uncorrected transposition of the great arteries/Situs ambiguus/HETEROTAXY VISCERAL 2 AUTOSOMAL/CFC1-Related Conotruncal Heart Malformations
SMPD4	protein_coding	ENSG00000136699	ENST00000409031	2,3,12,16,17	0.25	5	560	/
HS6ST1	protein_coding	ENSG00000136720	ENST00000259241	1.2	1	2	1236	Kallmann Syndrome/Normosmic congenital hypogonadotropic hypogonadism/HYPOGONADOTROPIC HYPOGONADISM 15 WITH OR WITHOUT ANOSMIA
ABI1	protein_coding	ENSG00000136754	ENST00000376142	6.12	0.166667	5	287	/
YME1L1	protein_coding	ENSG00000136758	ENST00000326799	7,8,9	0.15	3	318	OPTIC ATROPHY 11
KLF4	protein_coding	ENSG00000136826	ENST00000374672	5	0.2	2	51	/
ST6GALNAC4	protein_coding	ENSG00000136840	/	/	/	0	0	/
SLC31A1	protein_coding	ENSG00000136868	/	/	/	0	0	Autosomal Recessive Mental Retardation
BAAT	protein_coding	ENSG00000136881	/	/	/	0	0	Familial hypercholanemia/HYPERCHOLANEMIA FAMILIAL
PSMB7	protein_coding	ENSG00000136930	ENST00000259457	5	0.125	1	116	/
OR1L4	protein_coding	ENSG00000136939	ENST00000259466	1	1	1	936	/
APTX	protein_coding	ENSG00000137074	/	/	/	0	0	Ataxia-oculomotor apraxia type 1/ATAXIA EARLY-ONSET WITH OCULOMOTOR APRAXIA AND HYPOALBUMINEMIA/Ataxia with Oculomotor Apraxia 1
HINT2	protein_coding	ENSG00000137133	ENST00000259667	3	0.2	1	105	/
PPIL1	protein_coding	ENSG00000137168	ENST00000373699	4	0.25	1	221	/
KLC4	protein_coding	ENSG00000137171	/	/	/	0	0	/
KIAA0319	protein_coding	ENSG00000137261	/	/	/	0	0	/
TUBB2A	protein_coding	ENSG00000137267	ENST00000333628	2	0.25	1	109	Cortical dysplasia complex with other brain malformations 5
TUBB2B	protein_coding	ENSG00000137285	ENST00000259818	4	0.25	1	612	Congenital fibrosis of extraocular muscles/Dysequilibrium syndrome/Polymicrogyria due to TUBB2B mutation/Tubulinopathy-associated dysgyria/CORTICAL DYSPLASIA COMPLEX WITH OTHER BRAIN MALFORMATIONS 7/POLYMICROGYRIA ASYMMETRIC
HMGA1	protein_coding	ENSG00000137309	/	/	/	0	0	DIABETES MELLITUS NONINSULIN-DEPENDENT
TCF19	protein_coding	ENSG00000137310	/	/	/	0	0	/
MRPL15	protein_coding	ENSG00000137547	ENST00000260102	2,3,4	0.6	3	376	/
TRPC6	protein_coding	ENSG00000137672	ENST00000344327	6,7,8,9	0.307692	4	847	Familial idiopathic steroid-resistant nephrotic syndrome with focal segmental hyalinosis/FOCAL SEGMENTAL GLOMERULOSCLEROSIS 2
YAP1	protein_coding	ENSG00000137693	ENST00000615667	8	0.111111	1	96	Epithelioid hemangioendothelioma/Uveal coloboma - cleft lip and palate - intellectual disability/Coloboma ocular with or without hearing impairment cleft lip/palate and/or mental retardation
BTG4	protein_coding	ENSG00000137707	/	/	/	0	0	/
RDX	protein_coding	ENSG00000137710	/	/	/	0	0	Autosomal recessive non-syndromic sensorineural deafness type DFNB/Deafness autosomal recessive 24
CASP1	protein_coding	ENSG00000137752	ENST00000533400	1,2,4,5,6,7	0.666667	14	614	/
CTDSPL2	protein_coding	ENSG00000137770	/	/	/	0	0	/
DUOX1	protein_coding	ENSG00000137857	ENST00000321429	6,7,8,9	0.114286	4	547	/
GCOM1	protein_coding	ENSG00000137878	ENST00000587652	13	0.0666667	1	578	/
BRDT	protein_coding	ENSG00000137948	ENST00000399546	15,16,17,18,19	0.263158	6	651	SPERMATOGENIC FAILURE 21
DBT	protein_coding	ENSG00000137992	/	/	/	0	0	Classic maple syrup urine disease/Intermediate maple syrup urine disease/Intermittent maple syrup urine disease/Thiamine-responsive maple syrup urine disease/Maple Syrup Urine Disease/Maple Syrup Urine Diseaseq
PNPT1	protein_coding	ENSG00000138035	/	/	/	0	0	Autosomal recessive non-syndromic sensorineural deafness type DFNB/Combined oxidative phosphorylation defect type 13/COMBINED OXIDATIVE PHOSPHORYLATION DEFICIENCY 13/DEAFNESS AUTOSOMAL RECESSIVE 70/Hearing loss/Respiratory chain disorder
FAM149B1	protein_coding	ENSG00000138286	ENST00000242505	1,2,3,4,5,6,7,8,9,10,11,12	0.857143	12	1565	/
TET1	protein_coding	ENSG00000138336	ENST00000373644	4,7,8,11,12	0.416667	5	1644	/
OLA1	protein_coding	ENSG00000138430	/	/	/	0	0	/
COX17	protein_coding	ENSG00000138495	ENST00000261070	1	0.333333	3	107	/
USP8	protein_coding	ENSG00000138592	ENST00000396444	5,7,8,9,10,11,14,15,16,17,18,19,20	0.65	15	2811	Autosomal recessive spastic paraplegia type 59/Cushing disease/PITUITARY ADENOMA 4 ACTH-SECRETING
HNRNPD	protein_coding	ENSG00000138668	ENST00000313899	1.7	0.222222	4	250	/
LARP1B	protein_coding	ENSG00000138709	/	/	/	0	0	/
CNOT6L	protein_coding	ENSG00000138767	ENST00000504123	7,8,9,10,11,12	0.5	9	1109	/
ALG10	protein_coding	ENSG00000139133	/	/	/	1	12	/
NDUFA9	protein_coding	ENSG00000139180	ENST00000266544	2,3,4,5,6,11	0.545455	7	777	Leigh syndrome with leukodystrophy/MITOCHONDRIAL COMPLEX I DEFICIENCY NUCLEAR TYPE 26/Leigh syndrome
GLIPR1	protein_coding	ENSG00000139278	/	/	/	0	0	/
POC1B	protein_coding	ENSG00000139323	/	/	/	0	0	Cone rod dystrophy/CONE-ROD DYSTROPHY 20/Autosomal-Recessive cone-Rod dystrophy
SNRPF	protein_coding	ENSG00000139343	/	/	/	0	0	/
TDG	protein_coding	ENSG00000139372	ENST00000392872	2,3,5,7,8,9,10	0.7	9	1057	/
GLTP	protein_coding	ENSG00000139433	ENST00000318348	1	0.2	3	103	/
BRCA2	protein_coding	ENSG00000139618	/	/	/	0	0	Familial pancreatic carcinoma/Familial prostate cancer/Fanconi anemia/Hereditary breast and ovarian cancer syndrome/Hereditary breast cancer/Hereditary site-specific ovarian cancer syndrome/Inherited cancer-predisposing syndrome due to biallelic BRCA2 mutations/Nephroblastoma/Breast Cancer/BREAST-OVARIAN CANCER FAMILIAL SUSCEPTIBILITY TO 2/FANCONI ANEMIA COMPLEMENTATION GROUP D1/GLIOMA SUSCEPTIBI…
ESYT1	protein_coding	ENSG00000139641	/	/	/	0	0	/
RB1	protein_coding	ENSG00000139687	/	/	/	0	0	Hereditary retinoblastoma/Monosomy 13q14/Non-hereditary retinoblastoma/OSTEOSARCOMA/Small cell lung cancer/Bladder Cancer/OSTEOGENIC SARCOMA/RETINOBLASTOMA/Small cell cancer of the lung
ARMH4	protein_coding	ENSG00000139971	/	/	/	0	0	/
ADAM21	protein_coding	ENSG00000139985	ENST00000603540	2	0.5	1	2169	/
EFCAB11	protein_coding	ENSG00000140025	/	/	/	0	0	/
WARS	protein_coding	ENSG00000140105	ENST00000355338	10	0.0909091	1	141	NEURONOPATHY DISTAL HEREDITARY MOTOR TYPE IX
MFAP1	protein_coding	ENSG00000140259	/	/	/	0	0	/
SORD	protein_coding	ENSG00000140263	ENST00000267814	3.9	0.222222	3	331	/
DUOX2	protein_coding	ENSG00000140279	ENST00000389039	5,6,7,8	0.117647	4	549	Familial thyroid dyshormonogenesis/Genetic transient congenital hypothyroidism/THYROID DYSHORMONOGENESIS 6
BNIP2	protein_coding	ENSG00000140299	/	/	/	0	0	/
ANP32A	protein_coding	ENSG00000140350	ENST00000465139	7	0.142857	1	62	/
UBE2Q2	protein_coding	ENSG00000140367	/	/	/	0	0	/
ETFA	protein_coding	ENSG00000140374	/	/	/	0	0	Multiple acyl-CoA dehydrogenase deficiency mild type/Multiple acyl-CoA dehydrogenase deficiency severe neonatal type/MULTIPLE ACYL-CoA DEHYDROGENASE DEFICIENCY/glutaric aciduria type 2A
LINS1	protein_coding	ENSG00000140471	/	/	/	0	0	Autosomal recessive non-syndromic intellectual disability/Mental retardation autosomal recessive 27/Autosomal Recessive Mental Retardation
GOLGA6D	protein_coding	ENSG00000140478	ENST00000434739	1,2,3,11	0.222222	4	625	/
EFL1	protein_coding	ENSG00000140598	ENST00000268206	2,4,5,6,10,11,12,13,15	0.45	9	157	SHWACHMAN-DIAMOND SYNDROME/SHWACHMAN-DIAMOND SYNDROME 2
PMM2	protein_coding	ENSG00000140650	ENST00000268261	2,4,5,7	0.5	5	413	PMM2-CDG/CONGENITAL DISORDER OF GLYCOSYLATION TYPE Ia/Congenital Disorders of Glycosylation
FTO	protein_coding	ENSG00000140718	ENST00000471389	3.4	0.222222	3	691	Lethal polymalformative syndrome Boissel type/BODY MASS INDEX QUANTITATIVE TRAIT LOCUS 14/GROWTH RETARDATION DEVELOPMENTAL DELAY AND FACIAL DYSMORPHISM/GROWTH RETARDATION DEVELOPMENTAL DELAY COARSE FACIES AND EARLY DEATH
UQCRC2	protein_coding	ENSG00000140740	ENST00000268379	3,6,7,9,10	0.357143	5	515	Isolated complex III deficiency/MITOCHONDRIAL COMPLEX III DEFICIENCY NUCLEAR TYPE 5
AC092338.1	protein_coding	ENSG00000140743	/	/	/	0	0	/
TXNL4B	protein_coding	ENSG00000140830	/	/	/	0	0	/
CLEC18B	protein_coding	ENSG00000140839	ENST00000339953	3,11,12,13	0.307692	5	369	/
AC074143.1	protein_coding	ENSG00000140939	/	/	/	0	0	Familial cortical myoclonus/MYOCLONUS FAMILIAL 1
MAP1LC3B	protein_coding	ENSG00000140941	ENST00000650688	4.5	0.4	3	283	/
PDPK1	protein_coding	ENSG00000140992	ENST00000342085	2,3,4,5,6,7,8,9,10	0.642857	10	1101	/
CDRT15P1	unprocessed_pseudogene	ENSG00000141028	/	/	/	0	0	/
KSR1	protein_coding	ENSG00000141068	/	/	/	1	219	/
OR4D1	protein_coding	ENSG00000141194	/	/	/	0	0	/
TOM1L1	protein_coding	ENSG00000141198	/	/	/	0	0	/
NPEPPS	protein_coding	ENSG00000141279	ENST00000322157	2,3,5,6,7,8,10	0.304348	8	776	/
ARSG	protein_coding	ENSG00000141337	/	/	/	0	0	Usher syndrome type 3/USHER SYNDROME TYPE IV
AFG3L2	protein_coding	ENSG00000141385	ENST00000269143	1,2,4,5,7,8,9,10,11,12,13	0.647059	11	1458	Early-onset spastic ataxia-myoclonic epilepsy-neuropathy syndrome/Spinocerebellar ataxia type 28/SPASTIC ATAXIA 5 AUTOSOMAL RECESSIVE/SPINOCEREBELLAR ATAXIA 28/Ataxia spastic 5 autosomal recessive
GNAL	protein_coding	ENSG00000141404	/	/	/	0	0	Autosomal dominant focal dystonia DYT25 type/DYSTONIA 25
MEP1B	protein_coding	ENSG00000141434	/	/	/	0	0	/
GAREM1	protein_coding	ENSG00000141441	/	/	/	0	0	/
EIF4A3	protein_coding	ENSG00000141543	ENST00000649764	11	0.0833333	1	108	Richieri Costa Pereira syndrome/ROBIN SEQUENCE WITH CLEFT MANDIBLE AND LIMB ANOMALIES/RICHIERI-COSTA-PEREIRA SYNDROME
FOXK2	protein_coding	ENSG00000141568	/	/	/	0	0	/
WDR45B	protein_coding	ENSG00000141580	ENST00000392325	3,5,6,8,9,10	0.6	6	719	NEURODEVELOPMENTAL DISORDER WITH SPASTIC QUADRIPLEGIA AND BRAIN ABNORMALITIES WITH OR WITHOUT SEIZURES/Autosomal Recessive Mental Retardation
RETREG3	protein_coding	ENSG00000141699	/	/	/	0	0	/
AC008764.1	protein_coding	ENSG00000141979	ENST00000409035	5	0.0833333	1	73	/
SH3GL1	protein_coding	ENSG00000141985	/	/	/	0	0	LEUKEMIA ACUTE MYELOID
IFITM3	protein_coding	ENSG00000142089	ENST00000399808	1.2	1	4	93	INFLUENZA SEVERE SUSCEPTIBILITY TO
IFNAR1	protein_coding	ENSG00000142166	/	/	/	0	0	/
CARM1	protein_coding	ENSG00000142453	/	/	/	0	0	/
SLC47A1	protein_coding	ENSG00000142494	/	/	/	0	0	/
GPR32	protein_coding	ENSG00000142511	ENST00000270590	1	1	1	1055	/
CELA2A	protein_coding	ENSG00000142615	ENST00000359621	5	0.125	1	112	/
PGD	protein_coding	ENSG00000142657	ENST00000270776	3,5,7,8,9,10,11,12,13	0.692308	9	1232	/
CELA3A	protein_coding	ENSG00000142789	ENST00000290122	2,7,8	0.375	3	257	/
NBPF3	protein_coding	ENSG00000142794	ENST00000318249	13	0.0666667	1	173	/
IGSF3	protein_coding	ENSG00000143061	ENST00000369483	5	0.0833333	1	111	Familial congenital nasolacrimal duct obstruction/Lacrimal duct defect
ATP1B1	protein_coding	ENSG00000143153	ENST00000367816	4,5,7	0.428571	4	561	HYPERTENSION ESSENTIAL
NME7	protein_coding	ENSG00000143156	/	/	/	0	0	Situs inversus totalis
ADCY10	protein_coding	ENSG00000143199	/	/	/	0	0	Idiopathic hypercalciuria/HYPERCALCIURIA ABSORPTIVE 2
COP1	protein_coding	ENSG00000143207	ENST00000367669	5,11,12,13,15,16,17,18,20	0.45	10	1003	/
FCGR2A	protein_coding	ENSG00000143226	ENST00000271450	7	0.142857	2	174	Cystic Fibrosis/MALARIA SUSCEPTIBILITY TO MALARIA RESISTANCE TO INCLUDED/Systemic lupus erythematosus/THROMBOCYTOPENIC PURPURA AUTOIMMUNE
SDHC	protein_coding	ENSG00000143252	ENST00000367975	6	0.166667	5	172	Carney-Stratakis syndrome/COWDEN SYNDROME/Gastrointestinal stromal tumor/Hereditary pheochromocytoma-paraganglioma/PARAGANGLIOMA AND GASTRIC STROMAL SARCOMA/Paragangliomas 3
HDGF	protein_coding	ENSG00000143321	ENST00000368206	5.6	0.333333	5	210	/
TARS2	protein_coding	ENSG00000143374	ENST00000369064	9.18	0.111111	5	158	Combined oxidative phosphorylation defect type 21/Combined oxidative phosphorylation deficiency 21
ENSA	protein_coding	ENSG00000143420	/	/	/	0	0	/
LSP1P4	transcribed_unprocessed_pseudogene	ENSG00000143429	/	/	/	0	0	/
MRPL9	protein_coding	ENSG00000143436	ENST00000368830	3,5,7	0.428571	4	335	/
OAZ3	protein_coding	ENSG00000143450	/	/	/	0	0	/
SYT14	protein_coding	ENSG00000143469	ENST00000629778	4,8,10	0.3	9	669	Autosomal recessive cerebellar ataxia-psychomotor delay syndrome/SPINOCEREBELLAR ATAXIA AUTOSOMAL RECESSIVE 11
FLG2	protein_coding	ENSG00000143520	ENST00000388718	3	0.333333	1	463	Peeling skin syndrome type A/PEELING SKIN SYNDROME 6
JTB	protein_coding	ENSG00000143543	/	/	/	0	0	/
TPM3	protein_coding	ENSG00000143549	/	/	/	0	0	Cap myopathy/Childhood-onset nemaline myopathy/Congenital fiber-type disproportion myopathy/Congenital generalized hypercontractile muscle stiffness syndrome/Inflammatory myofibroblastic tumor/Intermediate nemaline myopathy/MYOPATHY CONGENITAL WITH FIBER-TYPE DISPROPORTION/NEMALINE MYOPATHY 1
CREB3L4	protein_coding	ENSG00000143578	/	/	/	0	0	/
FLG	protein_coding	ENSG00000143631	ENST00000368799	3	0.333333	1	4984	Dermatitis atopic 2/ICHTHYOSIS VULGARIS
CEP170	protein_coding	ENSG00000143702	ENST00000366542	4,5,6,7,8,9,10,11,12,13,14,15,16,17,18,19,20	0.85	24	4590	/
SRP9	protein_coding	ENSG00000143742	ENST00000304786	3	0.333333	2	120	/
PARP1	protein_coding	ENSG00000143799	ENST00000366794	4,5,6,8,13	0.217391	5	578	Autosomal Recessive Mental Retardation
TRIM43B	protein_coding	ENSG00000144010	ENST00000639673	2,4,7	0.428571	5	1124	/
TRIM43	protein_coding	ENSG00000144015	ENST00000272395	2,4,7	0.428571	3	1124	/
MRPS5	protein_coding	ENSG00000144029	ENST00000272418	5	0.0833333	1	110	/
MALL	protein_coding	ENSG00000144063	ENST00000272462	2,3,4	0.75	4	357	/
RABL2A	protein_coding	ENSG00000144134	ENST00000409875	3,5,7,8,9,10	0.6	11	610	/
LIPT1	protein_coding	ENSG00000144182	ENST00000393473	3	0.333333	3	110	Leigh syndrome with leukodystrophy/LIPOYLTRANSFERASE 1 DEFICIENCY/Leigh syndrome with secondary deficiency for pyruvate and alpha-ketoglutarate dehydrogenase,
TRIM43CP	unprocessed_pseudogene	ENSG00000144188	/	/	/	0	0	/
FAHD2B	protein_coding	ENSG00000144199	/	/	/	0	0	/
AMMECR1L	protein_coding	ENSG00000144233	ENST00000272647	3,4,5,8	0.5	5	534	/
PKP4	protein_coding	ENSG00000144283	ENST00000389759	9,10,11,12,13,14,15,16,17,19,22	0.5	18	1991	/
SLC4A10	protein_coding	ENSG00000144290	/	/	/	0	0	/
METTL21A	protein_coding	ENSG00000144401	ENST00000272839	4	0.25	6	193	/
UNC80	protein_coding	ENSG00000144406	/	/	/	0	0	Hypotonia-speech impairment-severe cognitive delay syndrome/HYPOTONIA INFANTILE WITH PSYCHOMOTOR RETARDATION AND CHARACTERISTICFACIES 2/Persistent Hypotonia Encephalopathy Growth Retardation and Severe Intellectual Disability
SUMF1	protein_coding	ENSG00000144455	/	/	/	0	0	MULTIPLE SULFATASE DEFICIENCY/Sulfatidosis Juvenile Austin Type
DIS3L2	protein_coding	ENSG00000144535	ENST00000325385	16,17,18,19,21	0.238095	6	489	Nephroblastoma/Perlman syndrome
FANCD2	protein_coding	ENSG00000144554	ENST00000287647	15,17,18,19,20,21,22,23,24,25,26,27,28	0.302326	13	1325	Fanconi anemia/FANCONI ANEMIA COMPLEMENTATION GROUP D2
CNTN4	protein_coding	ENSG00000144619	/	/	/	0	0	/
RBMS3	protein_coding	ENSG00000144642	/	/	/	0	0	/
OSBPL10	protein_coding	ENSG00000144645	/	/	/	0	0	/
SLC25A38	protein_coding	ENSG00000144659	ENST00000650617	1,2,4,5,6,7	0.857143	8	830	Autosomal recessive sideroblastic anemia/ANEMIA SIDEROBLASTIC 2 PYRIDOXINE-REFRACTORY/ANEMIA SIDEROBLASTIC PYRIDOXINE-REFRACTORY AUTOSOMAL RECESSIVE
CAND2	protein_coding	ENSG00000144712	/	/	/	0	0	/
RPL32	protein_coding	ENSG00000144713	ENST00000429711	2	0.25	5	54	/
SHQ1	protein_coding	ENSG00000144736	ENST00000325599	1,3,4,5,6,7,9,10,11	0.818182	10	1583	/
TMF1	protein_coding	ENSG00000144747	ENST00000646708	15,16,17	0.176471	5	423	/
ZNF660	protein_coding	ENSG00000144792	/	/	/	0	0	/
ADGRG7	protein_coding	ENSG00000144820	/	/	/	0	0	/
EIF2A	protein_coding	ENSG00000144895	ENST00000460851	10	0.0714286	1	302	/
CCDC39	lncRNA	ENSG00000145075	/	/	/	0	0	Primary ciliary dyskinesia/Ciliary dyskinesia primary 14
VWA5B2	protein_coding	ENSG00000145198	/	/	/	0	0	/
CENPC	protein_coding	ENSG00000145241	ENST00000273853	1,4,5,6,7,8,9,10,11,14,15,16,17,18,19	0.789474	15	2580	/
SRD5A1	protein_coding	ENSG00000145545	ENST00000274192	1,2,3,4,5	1	5	780	/
BDP1	protein_coding	ENSG00000145734	ENST00000358731	28,29,30,31,32,34,35,37,38,39	0.25641	10	1728	Autosomal recessive non-syndromic sensorineural deafness type DFNB/DEAFNESS AUTOSOMAL RECESSIVE 112
GTF2H2	protein_coding	ENSG00000145736	ENST00000274400	3,4,5	0.1875	3	202	/
SPATA9	protein_coding	ENSG00000145757	/	/	/	0	0	/
ATG12	protein_coding	ENSG00000145782	ENST00000509910	2	0.25	1	106	/
ZNF300	protein_coding	ENSG00000145908	ENST00000446148	7	0.142857	2	890	/
ABT1	protein_coding	ENSG00000146109	ENST00000274849	1,2,3	1	3	811	/
RPL7L1	protein_coding	ENSG00000146223	/	/	/	0	0	/
TMEM181	protein_coding	ENSG00000146433	/	/	/	0	0	/
SLC22A3	protein_coding	ENSG00000146477	/	/	/	0	0	/
CCZ1B	protein_coding	ENSG00000146574	ENST00000316731	2,3,4,5,7,8,9,10,11,12,13,14,15	0.866667	14	1245	/
POMZP3	protein_coding	ENSG00000146707	ENST00000310842	2,4,5,6	0.571429	5	405	/
AC211486.1	transcribed_unprocessed_pseudogene	ENSG00000146722	/	/	/	0	0	/
PSPH	protein_coding	ENSG00000146733	ENST00000395471	8	0.125	2	108	3-Phosphoserine phosphatase deficiency/PHOSPHOSERINE PHOSPHATASE DEFICIENCY/NEU-LAXOVA
TRIM50	protein_coding	ENSG00000146755	/	/	/	0	0	/
ZNF92	protein_coding	ENSG00000146757	/	/	/	0	0	/
TLK2	protein_coding	ENSG00000146872	ENST00000326270	5,6,8,23	0.173913	6	280	MENTAL RETARDATION AUTOSOMAL DOMINANT 57/TLK2 syndrome
NLGN4X	protein_coding	ENSG00000146938	ENST00000381093	5.6	0.333333	6	1640	ASPERGER SYNDROME X-LINKED SUSCEPTIBILITY TO 2/AUTISM SUSCEPTIBILITY TO X-LINKED 2/SUSCEPTIBILITY TO AUTISM X-LINKED TYPE 2
SHROOM2	protein_coding	ENSG00000146950	ENST00000380913	4	0.1	1	542	/
CASK	protein_coding	ENSG00000147044	/	/	/	0	0	Early infantile epileptic encephalopathy/X-linked intellectual disability Najm type/Anemia nonspherocytic hemolytic due to g6pd deficiency/FG SYNDROME 4/Mental retardation and microcephaly with pontine and cerebellar hypoplasia/FG SYNDROME TYPE 4/MENTAL RETARDATION X-LINKED CASK-RELATED/MRX with/without nystagmus
SPIN2A	protein_coding	ENSG00000147059	ENST00000374908	1	1	4	777	/
MSN	protein_coding	ENSG00000147065	ENST00000360270	1,3,4,6,7,8,9,10,11,12,13	0.846154	11	1566	Combined immunodeficiency due to Moesin deficiency/IMMUNODEFICIENCY 50
CCNB3	protein_coding	ENSG00000147082	ENST00000376042	6.13	0.153846	2	198	/
KRBOX4	protein_coding	ENSG00000147121	/	/	/	0	0	/
NDUFB11	protein_coding	ENSG00000147123	ENST00000276062	2.3	0.666667	4	262	Isolated complex I deficiency/MICROPHTHALMIA WITH LINEAR SKIN DEFECTS SYNDROME/LINEAR SKIN DEFECTS WITH MULTIPLE CONGENITAL ANOMALIES 1/LINEAR SKIN DEFECTS WITH MULTIPLE CONGENITAL ANOMALIES 3/MITOCHONDRIAL COMPLEX I DEFICIENCY NUCLEAR TYPE 30
NONO	protein_coding	ENSG00000147140	ENST00000276079	5,7,12	0.25	5	362	Macrocephaly-intellectual disability-left ventricular non compaction syndrome/MiT family translocation renal cell carcinoma/MENTAL RETARDATION X-LINKED SYNDROMIC 34/Syndromic intellectual disability
GCNA	protein_coding	ENSG00000147174	ENST00000373695	2,3,4,5	0.333333	4	162	/
DOCK11	protein_coding	ENSG00000147251	ENST00000276202	2,6,7,11,12,13,15,17,19,20,21,24,26,28,30,31,32,34,35,38,39,40,41,42,43,45,46,47,48,49,50,51,52,53	0.641509	36	4647	/
RPL10	protein_coding	ENSG00000147403	ENST00000424325	7	0.142857	3	91	X-linked intellectual disability-cerebellar hypoplasia-spondylo-epiphyseal dysplasia syndrome/X-linked microcephaly-growth retardation-prognathism-cryptorchidism syndrome/AUTISM SUSCEPTIBILITY TO X-LINKED 5/MENTAL RETARDATION X-LINKED SYNDROMIC 35
STAR	protein_coding	ENSG00000147465	ENST00000276449	1,2,4,5,6,7	0.857143	6	730	Classic congenital lipoid adrenal hyperplasia due to STAR deficency/Familial glucocorticoid deficiency/Non-classic congenital lipoid adrenal hyperplasia due to STAR deficency/LIPOID CONGENITAL ADRENAL HYPERPLASIA/Cholesterol Desmolase-Deficient Congenital Adrenal Hyperplasia
PXDNL	protein_coding	ENSG00000147485	/	/	/	0	0	/
TACC1	protein_coding	ENSG00000147526	ENST00000317827	3,4,5,6	0.307692	8	1334	Giant cell glioblastoma/Gliosarcoma
EBAG9	protein_coding	ENSG00000147654	ENST00000337573	7	0.142857	4	90	/
UHRF2	protein_coding	ENSG00000147854	ENST00000276893	1,2,3,4,5,6,7,8,9,10,11,12,13,14,15,16	1	17	2408	/
HAUS6	protein_coding	ENSG00000147874	ENST00000380502	16	0.0588235	2	804	/
SPATA31A3	protein_coding	ENSG00000147926	/	/	/	1	167	/
CBWD5	protein_coding	ENSG00000147996	ENST00000382405	3.8	0.133333	3	188	/
MFSD14B	protein_coding	ENSG00000148110	ENST00000375344	3.4	0.166667	2	191	/
MRRF	protein_coding	ENSG00000148187	ENST00000344641	2,3,4,5,6,7	0.857143	11	789	/
SURF6	protein_coding	ENSG00000148296	/	/	/	0	0	/
NACC2	protein_coding	ENSG00000148411	ENST00000277554	2	0.166667	2	886	/
PDSS1	protein_coding	ENSG00000148459	ENST00000376215	6.12	0.166667	2	143	Deafness-encephaloneuropathy-obesity-valvulopathy syndrome/COENZYME Q10 DEFICIENCY PRIMARY 2
TMEM236	protein_coding	ENSG00000148483	ENST00000377495	1,2,3,4	1	4	1056	/
RSU1	protein_coding	ENSG00000148484	/	/	/	0	0	/
ANKRD30A	protein_coding	ENSG00000148513	ENST00000361713	20,21,22,23,24	0.138889	10	532	/
GLUD1	protein_coding	ENSG00000148672	/	/	/	0	0	Hyperinsulinism-hyperammonemia syndrome/HYPERINSULINEMIC HYPOGLYCEMIA FAMILIAL 6
HTR7	protein_coding	ENSG00000148680	ENST00000336152	2.4	0.5	4	692	/
MKI67	protein_coding	ENSG00000148773	ENST00000368654	13,14,15	0.2	3	1523	/
BTBD10	protein_coding	ENSG00000148925	ENST00000530907	6,7,8	0.375	5	620	/
IMMP1L	protein_coding	ENSG00000148950	/	/	/	0	0	/
DGKZ	protein_coding	ENSG00000149091	ENST00000454345	3,4,9,11,14,15,20,21,22,26,29,32	0.375	22	1625	/
SERPINH1	protein_coding	ENSG00000149257	ENST00000524558	2,3,4,5	0.8	7	1260	Osteogenesis imperfecta type 3/OSTEOGENESIS IMPERFECTA TYPE X/PRETERM PREMATURE RUPTURE OF THE MEMBRANES
INTS4	protein_coding	ENSG00000149262	ENST00000534064	17	0.0434783	1	4	/
ROM1	protein_coding	ENSG00000149489	/	/	/	0	0	Retinitis pigmentosa/RETINITIS PIGMENTOSA 7
FRG1BP	unprocessed_pseudogene	ENSG00000149531	/	/	/	0	0	/
B3GAT3	protein_coding	ENSG00000149541	ENST00000265471	3,4,5	0.6	3	751	Larsen-like syndrome B3GAT3 type/MULTIPLE JOINT DISLOCATIONS SHORT STATURE AND CRANIOFACIAL DYSMORPHISMWITH OR WITHOUT CONGENITAL HEART DEFECTS
YTHDF1	protein_coding	ENSG00000149658	ENST00000370339	4	0.2	1	284	/
MRPL49	protein_coding	ENSG00000149792	/	/	/	0	0	/
CLEC1A	protein_coding	ENSG00000150048	/	/	/	0	0	Aspergillosis susceptibility to
ANXA8L1	protein_coding	ENSG00000150165	/	/	/	6	332	/
PCDH15	protein_coding	ENSG00000150275	/	/	/	0	0	Autosomal recessive non-syndromic sensorineural deafness type DFNB/Usher syndrome type 1/DEAFNESS AUTOSOMAL RECESSIVE 23/USHER SYNDROME TYPE ID/USHER SYNDROME TYPE IF
FCGR1A	protein_coding	ENSG00000150337	ENST00000369168	4	0.166667	1	252	/
DLAT	protein_coding	ENSG00000150768	/	/	/	0	0	PYRUVATE DEHYDROGENASE E2 DEFICIENCY
PRSS53	protein_coding	ENSG00000151006	/	/	/	0	0	/
LYZL2	protein_coding	ENSG00000151033	ENST00000375318	2	0.2	2	164	/
KCNA6	protein_coding	ENSG00000151079	ENST00000280684	1	1	1	126	/
NGLY1	protein_coding	ENSG00000151092	/	/	/	0	0	Alacrimia-choreoathetosis-liver dysfunction syndrome/CONGENITAL DISORDER OF DEGLYCOSYLATION
IPMK	protein_coding	ENSG00000151151	ENST00000373935	1,3,4,6	0.666667	4	1029	Hereditary neuroendocrine tumor of small intestine
SLC2A13	protein_coding	ENSG00000151229	ENST00000280871	3	0.1	1	209	/
GXYLT1	protein_coding	ENSG00000151233	/	/	/	0	0	/
TWF1	protein_coding	ENSG00000151239	ENST00000548315	1,3,4,5,7,8,9,10	0.8	11	975	/
FAM177A1	protein_coding	ENSG00000151327	ENST00000280987	2.5	0.4	4	338	/
FER	protein_coding	ENSG00000151422	ENST00000281092	15,18,19	0.15	3	341	/
VPS26B	protein_coding	ENSG00000151502	/	/	/	0	0	/
MMAA	protein_coding	ENSG00000151611	/	/	/	0	0	Vitamin B12-responsive methylmalonic acidemia type cblA/METHYLMALONIC ACIDURIA cblA TYPE/methylmalonic aciduria type cblA
EDNRA	protein_coding	ENSG00000151617	/	/	/	0	0	MANDIBULOFACIAL DYSOSTOSIS WITH ALOPECIA/MIGRAINE WITH OR WITHOUT AURA SUSCEPTIBILITY TO 1
AKR1C2	protein_coding	ENSG00000151632	ENST00000380753	1,4,5,7,8,9	0.666667	9	577	46XY disorder of sex development due to testicular 1720-desmolase deficiency/46XY SEX REVERSAL 8
WWC2	protein_coding	ENSG00000151718	/	/	/	0	0	/
AMN1	protein_coding	ENSG00000151743	/	/	/	0	0	/
SAV1	protein_coding	ENSG00000151748	ENST00000324679	2	0.2	1	441	/
PABPC3	protein_coding	ENSG00000151846	ENST00000281589	1	1	1	1051	/
NBPF11	protein_coding	ENSG00000152042	/	/	/	4	283	/
CCDC74B	protein_coding	ENSG00000152076	ENST00000310463	1,2,3,4,5,6	0.75	14	1186	/
MZT2B	protein_coding	ENSG00000152082	ENST00000409255	1.2	0.5	4	319	/
TUBA3E	protein_coding	ENSG00000152086	ENST00000312988	2,3,5	0.6	3	669	/
CFC1B	protein_coding	ENSG00000152093	ENST00000281882	1,2,3,4,5,6	1	10	691	/
AC073869.1	transcribed_processed_pseudogene	ENSG00000152117	/	/	/	0	0	/
KCNK13	protein_coding	ENSG00000152315	/	/	/	0	0	/
GUCY1A2	protein_coding	ENSG00000152402	/	/	/	0	0	/
XRCC4	protein_coding	ENSG00000152422	/	/	/	0	0	LIG4 SYNDROME/Microcephalic primordial dwarfism-insulin resistance syndrome/SHORT STATURE MICROCEPHALY AND ENDOCRINE DYSFUNCTION/Primordial Dwarfism
ZNF773	protein_coding	ENSG00000152439	ENST00000282292	2,3,4	0.75	5	815	/
DCLRE1C	protein_coding	ENSG00000152457	ENST00000378278	4,6,7,8,9	0.357143	6	478	OMENN SYNDROME/Severe combined immunodeficiency due to DCLRE1C deficiency/SEVERE COMBINED IMMUNODEFICIENCY WITH SENSITIVITY TO IONIZING RADIATION
ZSCAN1	protein_coding	ENSG00000152467	/	/	/	0	0	/
GJA1	protein_coding	ENSG00000152661	ENST00000282561	2	0.5	4	1149	Autosomal dominant palmoplantar keratoderma and congenital alopecia/Autosomal recessive non-syndromic sensorineural deafness type DFNB/Craniometaphyseal dysplasia/Erythrokeratodermia variabilis/HYPOPLASTIC LEFT HEART SYNDROME/OCULODENTODIGITAL DYSPLASIA/Syndactyly type 3/ATRIOVENTRICULAR SEPTAL DEFECT 3/CRANIOMETAPHYSEAL DYSPLASIA AUTOSOMAL RECESSIVE/ERYTHROKERATODERMIA VARIABILIS ET PROGRESSIVA …
FAM21B	protein_coding	ENSG00000152726	/	/	/	3	324	/
FARP1	protein_coding	ENSG00000152767	/	/	/	0	0	/
SRP19	protein_coding	ENSG00000153037	/	/	/	0	0	/
CDYL	protein_coding	ENSG00000153046	ENST00000397588	2.7	0.285714	6	417	/
ANAPC1	protein_coding	ENSG00000153107	ENST00000341068	2,3,4,5,6,7,8,9,10,11,12,13,14,15,16,17,18,20,26,33,34,35,36,38,39,40,41,42,43,44,45,46,47,48	0.708333	36	4061	/
SCOC	protein_coding	ENSG00000153130	/	/	/	0	0	/
BMP6	protein_coding	ENSG00000153162	ENST00000283147	3,6,7	0.428571	3	265	Hemochromatosis type 5
HNRNPU	protein_coding	ENSG00000153187	ENST00000640218	12.14	0.142857	6	239	1q44 microdeletion syndrome/EPILEPTIC ENCEPHALOPATHY EARLY INFANTILE 54/Epileptic encephalopathy
AHCTF1	protein_coding	ENSG00000153207	ENST00000326225	3.33	0.0555556	2	1602	/
RBMS1	protein_coding	ENSG00000153250	/	/	/	0	0	/
LINC00467	lncRNA	ENSG00000153363	/	/	/	0	0	/
TMEM251	protein_coding	ENSG00000153485	ENST00000415050	1.2	1	3	510	/
RMND5A	protein_coding	ENSG00000153561	ENST00000283632	2	0.111111	1	143	/
RPIA	protein_coding	ENSG00000153574	ENST00000283646	8	0.111111	1	100	Ribose-5-P isomerase deficiency/RIBOSE 5-PHOSPHATE ISOMERASE DEFICIENCY
GOLGA8F	protein_coding	ENSG00000153684	ENST00000532622	1.2	0.105263	2	168	/
TGIF2LX	protein_coding	ENSG00000153779	ENST00000561129	1	1	2	726	/
FBXO36	protein_coding	ENSG00000153832	ENST00000283946	2,3,4	0.75	6	471	/
HS3ST3A1	protein_coding	ENSG00000153976	ENST00000284110	2	0.5	2	526	/
GRAP	protein_coding	ENSG00000154016	ENST00000284154	1,2,3	0.6	5	299	/
CABYR	protein_coding	ENSG00000154040	ENST00000621648	2.4	0.333333	11	953	/
ANKH	protein_coding	ENSG00000154122	/	/	/	0	0	Craniometaphyseal dysplasia/Familial calcium pyrophosphate deposition/CHONDROCALCINOSIS 2/CRANIOMETAPHYSEAL DYSPLASIA AUTOSOMAL DOMINANT/CRANIOMETAPHYSEAL DYSPLASIA JACKSON TYPE
CYP4Z2P	transcribed_unprocessed_pseudogene	ENSG00000154198	/	/	/	0	0	/
ENPP3	protein_coding	ENSG00000154269	/	/	/	0	0	/
BUB3	protein_coding	ENSG00000154473	ENST00000368865	2,4,5,6,7	0.625	7	847	Mosaic variegated aneuploidy syndrome
CNTNAP3B	protein_coding	ENSG00000154529	/	/	/	3	490	/
MAGED4	protein_coding	ENSG00000154545	ENST00000599522	2,3,4,5,6,7,8,9,10,11,12,13,14	0.928571	15	2278	/
CEP170P1	transcribed_unprocessed_pseudogene	ENSG00000154608	/	/	/	0	0	/
PSMA8	protein_coding	ENSG00000154611	/	/	/	0	0	/
CXADR	protein_coding	ENSG00000154639	/	/	/	0	0	/
BTG3	protein_coding	ENSG00000154640	/	/	/	0	0	/
JAM2	protein_coding	ENSG00000154721	/	/	/	0	0	/
ATP5PF	protein_coding	ENSG00000154723	ENST00000457143	4	0.25	1	38	/
GABPA	protein_coding	ENSG00000154727	ENST00000354828	3,5,6,8,9,10	0.6	6	1149	/
TSEN2	protein_coding	ENSG00000154743	ENST00000284995	2,5,8,10,11,12	0.5	11	971	Pontocerebellar hypoplasia type 2/PONTOCEREBELLAR HYPOPLASIA TYPE 2B/Pontocerebellar Hypoplasia Type 2 and Type 4
SLFN13	protein_coding	ENSG00000154760	ENST00000285013	5.6	0.333333	6	797	/
FGD5	protein_coding	ENSG00000154783	ENST00000285046	1	0.05	1	2151	/
OXNAD1	protein_coding	ENSG00000154814	/	/	/	0	0	/
PIEZO2	protein_coding	ENSG00000154864	ENST00000503781	4	0.0192308	1	43	Arthrogryposis- oculomotor limitation-electroretinal anomalies syndrome/Gordon syndrome/Marden-Walker syndrome/Arthrogryposis distal type 3/ARTHROGRYPOSIS DISTAL TYPE 5/ARTHROGRYPOSIS DISTAL WITH IMPAIRED PROPRIOCEPTION AND TOUCH/Ataxia dysmetria contractures and scoliosis with normal cognition but loss of discriminative touch perception
CCDC144B	transcribed_unprocessed_pseudogene	ENSG00000154874	/	/	/	0	0	/
MPPE1	protein_coding	ENSG00000154889	ENST00000588072	3,4,5,7,10,11	0.545455	9	923	/
CCDC144CP	transcribed_processed_pseudogene	ENSG00000154898	/	/	/	0	0	/
VOPP1	protein_coding	ENSG00000154978	ENST00000285279	5	0.2	8	125	/
2014-09-01	protein_coding	ENSG00000154997	ENST00000388975	6,7,8,9	0.4	4	303	Giant cell glioblastoma/Gliosarcoma
RSPH10B	protein_coding	ENSG00000155026	ENST00000405415	2,3,4,5,6,7,8,9,10,11,12,13,14,15,16,17,18,19,20	0.95	23	2613	/
AGPAT5	protein_coding	ENSG00000155189	/	/	/	0	0	/
SLC16A1	protein_coding	ENSG00000155380	ENST00000538576	2,3,4	0.6	3	383	Exercise-induced hyperinsulinism/Ketoacidosis due to monocarboxylate transporter-1 deficiency/Metabolic myopathy due to lactate transporter defect/ERYTHROCYTE LACTATE TRANSPORTER DEFECT/HYPERINSULINEMIC HYPOGLYCEMIA FAMILIAL 7/MONOCARBOXYLATE TRANSPORTER 1 DEFICIENCY
TRIM74	protein_coding	ENSG00000155428	ENST00000285805	2,3,4,5	0.8	5	753	/
NIFK	protein_coding	ENSG00000155438	/	/	/	0	0	/
LARP1	protein_coding	ENSG00000155506	ENST00000336314	18.19	0.105263	2	319	/
XAGE2	protein_coding	ENSG00000155622	ENST00000286049	2,3,4,5	0.8	4	336	/
TTN	protein_coding	ENSG00000155657	ENST00000589042	181,182,183,184,185,186,187,188,190,191,192	0.030303	11	868	Autosomal recessive centronuclear myopathy/Autosomal recessive limb-girdle muscular dystrophy type 2J/Childhood-onset progressive contractures-limb-girdle weakness-muscle dystrophy syndrome/Classic multiminicore myopathy/Early-onset myopathy with fatal cardiomyopathy/Familial atrial fibrillation/Familial isolated arrhythmogenic ventricular dysplasia biventricular form/Familial isolated arrhythmog…
OTOA	protein_coding	ENSG00000155719	ENST00000646100	22,23,24,25,26,27,28,29	0.275862	10	1119	Autosomal recessive non-syndromic sensorineural deafness type DFNB/DEAFNESS AUTOSOMAL RECESSIVE 22
SLC24A2	protein_coding	ENSG00000155886	/	/	/	0	0	/
RAET1L	protein_coding	ENSG00000155918	ENST00000367341	2,3,4	0.6	4	656	/
GRIP1	protein_coding	ENSG00000155974	/	/	/	0	0	FRASER SYNDROME/FRASER SYNDROME 3
GNAQ	protein_coding	ENSG00000156052	ENST00000286548	1,2,3,4,5,6,7	1	7	1079	Familial multiple nevi flammei/Phakomatosis cesioflammea/Sturge-Weber syndrome/Uveal melanoma/Capillary malformations congenital/Congenital Hemangioma
UGT2B4	protein_coding	ENSG00000156096	/	/	/	0	0	/
ADK	protein_coding	ENSG00000156110	/	/	/	0	0	Hypermethioninemia encephalopathy due to adenosine kinase deficiency/HYPERMETHIONINEMIA DUE TO ADENOSINE KINASE DEFICIENCY/Autosomal Recessive Mental Retardation
DPY19L4	protein_coding	ENSG00000156162	ENST00000414645	17.18	0.105263	2	258	/
CCT8	protein_coding	ENSG00000156261	ENST00000286788	2,4,5,7,8,11,14	0.466667	8	975	/
FUT6	protein_coding	ENSG00000156413	ENST00000318336	3	0.333333	5	648	FUCOSYLTRANSFERASE 6 DEFICIENCY
RAB11FIP1	protein_coding	ENSG00000156675	ENST00000330843	2,3,5	0.5	6	433	/
UNC5D	protein_coding	ENSG00000156687	/	/	/	0	0	/
GLYATL2	protein_coding	ENSG00000156689	/	/	/	0	0	/
AIFM1	protein_coding	ENSG00000156709	ENST00000287295	2,9,13,16	0.25	4	436	Severe X-linked mitochondrial encephalomyopathy/Spondyloepimetaphyseal dysplasia Bieganski type/X-linked Charcot-Marie-Tooth disease type 4/X-linked hereditary sensory and autonomic neuropathy with deafness/COMBINED OXIDATIVE PHOSPHORYLATION DEFICIENCY 6/COWCHOCK SYNDROME/Deafness X-linked 5
TATDN2	protein_coding	ENSG00000157014	ENST00000287652	2	0.125	1	110	/
SEC13	protein_coding	ENSG00000157020	ENST00000383801	5,6,7,8,10	0.5	7	659	/
EXOG	protein_coding	ENSG00000157036	ENST00000287675	3,5,6	0.5	4	315	/
ZFYVE9	protein_coding	ENSG00000157077	ENST00000287727	7,8,9,10,11,13	0.315789	6	853	/
CLEC18A	protein_coding	ENSG00000157322	ENST00000615430	5.6	0.153846	2	220	/
DHRS4	protein_coding	ENSG00000157326	ENST00000313250	4,5,6,8	0.5	9	373	/
CLEC18C	protein_coding	ENSG00000157335	ENST00000618957	4,5,6,12	0.307692	5	579	/
DDX19B	protein_coding	ENSG00000157349	ENST00000563206	11	0.0833333	1	192	/
ARSE	protein_coding	ENSG00000157399	ENST00000545496	10,11,12	0.25	4	644	Brachytelephalangic chondrodysplasia punctata/Chondrodysplasia punctata 1 X-linked recessive/Chondrodysplasia Punctata 1 X-Linked
HYDIN	protein_coding	ENSG00000157423	ENST00000393567	6,7,8,9,10,12,13,17,18,19,20,21,23,24,25,26,27,28,29,30,31,32,33,34,35,36,37,38,39,40,41,43,44,45,46,47,48,49,50,51,52,54,55,56,57,58,59,60,61,62,63,64,65,67,68,69,70,71,72,73,74,75,76,78,79,80,81,82,83,84	0.813953	73	12667	Primary ciliary dyskinesia/CILIARY DYSKINESIA PRIMARY 5
RNF111	protein_coding	ENSG00000157450	/	/	/	0	0	/
CCNB2	protein_coding	ENSG00000157456	ENST00000288207	2,3,4,6,7,8,9	0.777778	9	1010	/
KCNJ15	protein_coding	ENSG00000157551	/	/	/	0	0	/
TAB3	protein_coding	ENSG00000157625	ENST00000378933	7,8,9	0.25	3	487	/
BRAF	protein_coding	ENSG00000157764	/	/	/	0	0	CARDIOFACIOCUTANEOUS SYNDROME/Classic hairy cell leukemia/Craniopharyngioma/Differentiated thyroid carcinoma/Hashimoto-Pritzker syndrome/Noonan Syndrome/Noonan syndrome with multiple lentigines/Pilomyxoid astrocytoma/Selection of therapeutic option in colorectal cancer/Selection of therapeutic option in non-small cell lung carcinoma/CARDIOFACIOCUTANEOUS SYNDROME 1/LEOPARD SYNDROME 3/LUNG CANCER A…
ACAN	protein_coding	ENSG00000157766	ENST00000439576	12	0.0555556	2	649	Familial osteochondritis dissecans/Short stature-advanced bone age-early onset osteoarthritis syndrome/SPONDYLOEPIMETAPHYSEAL DYSPLASIA AGGRECAN TYPE/Spondyloepiphyseal dysplasia Kimberley type/SHORT STATURE AND ADVANCED BONE AGE WITH OR WITHOUT EARLY-ONSETOSTEOARTHRITIS AND/OR OSTEOCHONDRITIS DISSECANS/SPONDYLOEPIPHYSEAL DYSPLASIA TYPE KIMBERLEY
NCK1	protein_coding	ENSG00000158092	/	/	/	0	0	/
TPRG1L	protein_coding	ENSG00000158109	ENST00000378344	4.5	0.4	2	208	/
HIST1H2BD	protein_coding	ENSG00000158373	/	/	/	0	0	/
MITD1	protein_coding	ENSG00000158411	/	/	/	0	0	/
AHCYL2	protein_coding	ENSG00000158467	/	/	/	0	0	/
NCF1	protein_coding	ENSG00000158517	ENST00000289473	2.5	0.181818	2	137	Chronic granulomatous disease/GRANULOMATOUS DISEASE CHRONIC AUTOSOMAL RECESSIVE CYTOCHROMEb-POSITIVE TYPE I
COPG2	protein_coding	ENSG00000158623	/	/	/	0	0	/
TAGLN2	protein_coding	ENSG00000158710	ENST00000368096	2,3,4,5	0.8	6	550	/
USF1	protein_coding	ENSG00000158773	ENST00000368021	5.6	0.181818	3	279	HYPERLIPIDEMIA COMBINED 1
RUNX1	protein_coding	ENSG00000159216	/	/	/	0	0	Acute myeloid leukemia with t(8;21)(q22;q22) translocation/Chronic myeloid leukemia/Hereditary thrombocytopenia with normal platelets-hematological cancer predisposition syndrome/Isolated delta-storage pool disease/Precursor B-cell acute lymphoblastic leukemia/LEUKEMIA ACUTE MYELOID/PLATELET DISORDER FAMILIAL WITH ASSOCIATED MYELOID MALIGNANCY
CLDN14	protein_coding	ENSG00000159261	/	/	/	0	0	Autosomal recessive non-syndromic sensorineural deafness type DFNB/DEAFNESS AUTOSOMAL RECESSIVE 29
GOLGA6A	protein_coding	ENSG00000159289	ENST00000290438	1,3,11,18	0.222222	4	570	/
ARHGAP27	protein_coding	ENSG00000159314	ENST00000428638	1	0.0588235	4	732	/
PSMD4	protein_coding	ENSG00000159352	ENST00000368881	2,3,6,7,10	0.5	7	706	/
CES5A	protein_coding	ENSG00000159398	ENST00000521992	5,6,7,8,9,10,11	0.5	8	856	/
HK2	protein_coding	ENSG00000159399	ENST00000290573	1,2,3,4,5,6,7,8,9,10,11,12,13,14,15,16,17,18	1	19	2730	/
TCHH	protein_coding	ENSG00000159450	ENST00000614923	3	0.333333	1	131	UNCOMBABLE HAIR SYNDROME 3
EFCAB14	protein_coding	ENSG00000159658	ENST00000371933	1,2,3	0.272727	3	480	/
ANKRD18CP	unprocessed_pseudogene	ENSG00000159712	/	/	/	0	0	/
TCAF2P1	transcribed_unprocessed_pseudogene	ENSG00000159860	/	/	/	0	0	/
OR3A3	protein_coding	ENSG00000159961	ENST00000291231	1	1	1	714	/
ATAD3B	protein_coding	ENSG00000160072	ENST00000308647	3,4,5,10,11,15	0.375	6	592	/
CPAMD8	protein_coding	ENSG00000160111	ENST00000651564	11	0.0238095	1	128	ANTERIOR SEGMENT DYSGENESIS 8/Anterior Segment Dysgenesis
ZNF761	protein_coding	ENSG00000160336	ENST00000613950	3	0.333333	1	128	/
LCN1	protein_coding	ENSG00000160349	ENST00000263598	2,3,4,5,6	0.714286	5	248	/
PCSK7	protein_coding	ENSG00000160613	ENST00000320934	13,14,15,16,17	0.294118	7	824	/
SAFB	protein_coding	ENSG00000160633	ENST00000588852	7	0.047619	1	511	/
SHC1	protein_coding	ENSG00000160691	ENST00000448116	1	0.0833333	3	185	/
IL6R	protein_coding	ENSG00000160712	ENST00000368485	2,4,5	0.3	3	298	INTERLEUKIN 6 SERUM LEVEL OF QUANTITATIVE TRAIT LOCUS/SOLUBLE INTERLEUKIN-6 RECEPTOR SERUM LEVEL OF QUANTITATIVE TRAIT LOCUS
GBAP1	transcribed_unprocessed_pseudogene	ENSG00000160766	/	/	/	0	0	/
UBQLN4	protein_coding	ENSG00000160803	/	/	/	0	0	/
STAG3L2	pseudogene	ENSG00000160828	/	/	/	0	0	/
AZGP1	protein_coding	ENSG00000160862	ENST00000292401	3.4	0.5	3	597	/
SQSTM1	protein_coding	ENSG00000161011	/	/	/	0	0	Amyotrophic lateral sclerosis/Behavioral variant of frontotemporal dementia/Frontotemporal dementia with motor neuron disease/Frontotemporal dementia and/or amyotrophic lateral sclerosis 3/MYOPATHY DISTAL WITH RIMMED VACUOLES/NEURODEGENERATION WITH ATAXIA DYSTONIA AND GAZE PALSY CHILDHOOD-ONSET/PAGET DISEASE OF BONE 3
RPL8	protein_coding	ENSG00000161016	ENST00000262584	4,5,6	0.5	6	494	/
NAPEPLD	protein_coding	ENSG00000161048	/	/	/	0	0	/
AC008132.13	protein_coding	ENSG00000161103	/	/	/	1	747	/
USP41	protein_coding	ENSG00000161133	ENST00000454608	7,11,12,13	0.307692	4	500	/
TUBA3FP	lncRNA	ENSG00000161149	/	/	/	0	0	/
PLXDC1	protein_coding	ENSG00000161381	/	/	/	0	0	/
TBC1D3G	protein_coding	ENSG00000161583	/	/	/	1	95	/
SIGLEC11	protein_coding	ENSG00000161640	ENST00000447370	1,2,3,4,5,6	0.545455	7	1105	/
SIGLEC16	transcribed_unprocessed_pseudogene	ENSG00000161643	/	/	/	0	0	/
LSM12	protein_coding	ENSG00000161654	ENST00000591247	2,3,4,5,6	0.833333	8	588	/
RACGAP1	protein_coding	ENSG00000161800	ENST00000427314	5,6,10,11,12,13,14,15,16,17,18,19	0.631579	16	1599	/
LARP4	protein_coding	ENSG00000161813	ENST00000429001	2,3,5,6,7,9,10,11,13,14,15,16	0.75	20	1992	/
ALOX15	protein_coding	ENSG00000161905	ENST00000570836	2,3,4,5,6,7,8,9,10,11,12,13,14,15	0.933333	19	1768	/
ADCY10P1	transcribed_unprocessed_pseudogene	ENSG00000161912	/	/	/	0	0	/
SNRNP25	protein_coding	ENSG00000161981	/	/	/	0	0	/
LBHD1	protein_coding	ENSG00000162194	ENST00000532208	6.7	0.285714	4	129	/
SYVN1	protein_coding	ENSG00000162298	/	/	/	0	0	/
CYP4A22	protein_coding	ENSG00000162365	ENST00000371891	5,6,7,8,9	0.416667	9	767	/
ZYG11B	protein_coding	ENSG00000162378	/	/	/	0	0	/
USP24	protein_coding	ENSG00000162402	ENST00000294383	49	0.0147059	1	48	/
ZSWIM5	protein_coding	ENSG00000162415	ENST00000359600	2,3,4,5,6	0.357143	5	757	/
AK4	protein_coding	ENSG00000162433	/	/	/	0	0	/
DRAXIN	protein_coding	ENSG00000162490	ENST00000294485	2,3,4,7	0.571429	4	743	/
SYNC	protein_coding	ENSG00000162520	/	/	/	0	0	/
RBBP4	protein_coding	ENSG00000162521	/	/	/	0	0	/
HFM1	protein_coding	ENSG00000162669	/	/	/	0	0	Premature ovarian failure 9
EXTL2	protein_coding	ENSG00000162694	ENST00000370113	5	0.2	2	427	/
NCSTN	protein_coding	ENSG00000162736	/	/	/	0	0	ACNE INVERSA FAMILIAL 1
SLAMF6	protein_coding	ENSG00000162739	ENST00000368057	2	0.125	1	292	/
FCGR3B	protein_coding	ENSG00000162747	ENST00000531221	2.3	0.4	4	279	Neonatal alloimmune neutropenia/Systemic lupus erythematosus
AXDND1	protein_coding	ENSG00000162779	/	/	/	0	0	/
NBPF8	protein_coding	ENSG00000162825	/	/	/	1	84	/
B3GALNT2	protein_coding	ENSG00000162885	ENST00000366600	2,4,5,6,8,10	0.5	6	645	Autosomal recessive non-syndromic intellectual disability/Muscle-eye-brain disease/Walker-Warburg syndrome/MUSCULAR DYSTROPHY-DYSTROGLYCANOPATHY (CONGENITAL WITH BRAIN AND EYEANOMALIES) TYPE A 11/MUSCULAR DYSTROPHY-DYSTROGLYCANOPATHY (CONGENITAL WITH BRAIN AND EYE ANOMALIES) TYPE A 11
MEMO1	protein_coding	ENSG00000162959	/	/	/	0	0	/
DPY30	protein_coding	ENSG00000162961	/	/	/	0	0	/
ARL5A	protein_coding	ENSG00000162980	/	/	/	0	0	/
ALMS1P1	transcribed_unprocessed_pseudogene	ENSG00000163016	/	/	/	0	0	/
CCDC74A	protein_coding	ENSG00000163040	ENST00000295171	1	0.125	3	250	/
H3F3A	protein_coding	ENSG00000163041	ENST00000366813	3	0.333333	7	104	/
SLC16A14	protein_coding	ENSG00000163053	ENST00000295190	3.4	0.4	2	1107	/
TEKT4	protein_coding	ENSG00000163060	ENST00000295201	1,2,3,4,5,6	1	6	1295	/
CDC42EP3	protein_coding	ENSG00000163171	ENST00000295324	2	0.5	2	765	/
ALPP	protein_coding	ENSG00000163283	ENST00000392027	6,7,8,9,10,11	0.545455	6	951	/
ALPG	protein_coding	ENSG00000163286	ENST00000295453	6,7,8,9,10,11	0.545455	6	910	/
CGGBP1	protein_coding	ENSG00000163320	/	/	/	0	0	/
ABRAXAS1	protein_coding	ENSG00000163322	/	/	/	0	0	/
PYGO2	protein_coding	ENSG00000163348	/	/	/	0	0	/
YY1AP1	protein_coding	ENSG00000163374	ENST00000368339	6,9,10	0.3	5	1294	GRANGE SYNDROME
PDCL2	protein_coding	ENSG00000163440	/	/	/	0	0	/
TMEM183A	protein_coding	ENSG00000163444	ENST00000367242	3.8	0.25	2	287	/
SRGAP2	protein_coding	ENSG00000163486	/	/	/	4	741	/
IFI16	protein_coding	ENSG00000163565	ENST00000368131	8	0.0909091	3	336	/
EIF5A2	protein_coding	ENSG00000163577	ENST00000295822	4	0.2	2	132	/
GMPS	protein_coding	ENSG00000163655	ENST00000496455	13,14,15,16	0.25	5	522	/
CXCL1	protein_coding	ENSG00000163739	ENST00000395761	1.2	0.5	2	171	/
CCDC158	protein_coding	ENSG00000163749	/	/	/	0	0	/
GYG1	protein_coding	ENSG00000163754	/	/	/	0	0	Glycogen storage disease with severe cardiomyopathy due to glycogenin deficiency/Polyglucosan body myopathy type 2/GLYCOGEN STORAGE DISEASE XV/POLYGLUCOSAN BODY MYOPATHY 2
RYK	protein_coding	ENSG00000163785	ENST00000620660	4,5,6,8,9,10,13,14,15,16,17	0.733333	13	1340	/
SLC4A1AP	protein_coding	ENSG00000163798	/	/	/	0	0	/
SMIM12	protein_coding	ENSG00000163866	/	/	/	0	0	/
MEAF6	protein_coding	ENSG00000163875	ENST00000373075	3,5,8	0.375	6	336	/
DNALI1	protein_coding	ENSG00000163879	/	/	/	0	0	/
RPN1	protein_coding	ENSG00000163902	/	/	/	0	0	Acute myeloid leukemia with inv3(q21;q26,2) or t(3;3)(q21;q26,2)
IFT122	protein_coding	ENSG00000163913	ENST00000296266	15.27	0.0645161	2	277	Cranioectodermal dysplasia/Short rib-polydactyly syndrome Beemer-Langer type/CRANIOECTODERMAL DYSPLASIA 1
UVSSA	protein_coding	ENSG00000163945	/	/	/	1	253	UV-sensitive syndrome/UV-SENSITIVE SYNDROME 3
OTOP1	protein_coding	ENSG00000163982	ENST00000296358	6	0.166667	1	171	/
METAP1	protein_coding	ENSG00000164024	/	/	/	0	0	/
SLC9B2	protein_coding	ENSG00000164038	/	/	/	0	0	/
BDH2	protein_coding	ENSG00000164039	ENST00000296424	2,4,5,7,9,10	0.6	6	539	/
CDC25A	protein_coding	ENSG00000164045	/	/	/	0	0	/
ZNF589	protein_coding	ENSG00000164048	/	/	/	0	0	/
APEH	protein_coding	ENSG00000164062	/	/	/	0	0	/
RNF123	protein_coding	ENSG00000164068	/	/	/	0	0	/
HMGB2	protein_coding	ENSG00000164104	ENST00000296503	2,3,4,5	0.8	6	556	/
ANAPC10	protein_coding	ENSG00000164162	ENST00000613466	3,4,5	0.6	5	443	/
OTUD4	protein_coding	ENSG00000164164	ENST00000454497	7,9,11,12,13,15,18,19,21	0.428571	12	2537	/
LSM6	protein_coding	ENSG00000164167	ENST00000296581	2.3	0.5	3	192	/
TMEM161B	protein_coding	ENSG00000164180	ENST00000514135	2,4,5,6,8,9,10,11,12	0.692308	18	1320	/
ADGRV1	protein_coding	ENSG00000164199	/	/	/	0	0	Generalized epilepsy with febrile seizures-plus/Usher syndrome type 2/FEBRILE SEIZURES FAMILIAL 4/USHER SYNDROME TYPE IIC
PRDM9	protein_coding	ENSG00000164256	ENST00000296682	11	0.0909091	1	825	/
RHOBTB3	protein_coding	ENSG00000164292	/	/	/	0	0	/
CASP3	protein_coding	ENSG00000164305	ENST00000308394	4,5,6,7	0.5	4	528	/
CFAP97	protein_coding	ENSG00000164323	/	/	/	0	0	/
CCDC127	protein_coding	ENSG00000164366	ENST00000296824	2	0.333333	1	121	/
TBX20	protein_coding	ENSG00000164532	ENST00000408931	8	0.125	1	341	Atrial septal defect ostium secundum type/ATRIAL SEPTAL DEFECT 4/ATRIAL SEPTAL DEFECT TYPE 4
RP9	protein_coding	ENSG00000164610	ENST00000297157	1,2,3,4,5,6	1	6	609	Retinitis pigmentosa/RETINITIS PIGMENTOSA 9
KIF6	protein_coding	ENSG00000164627	/	/	/	0	0	/
STEAP1	protein_coding	ENSG00000164647	ENST00000297205	3.4	0.4	2	441	/
INTS4P1	transcribed_unprocessed_pseudogene	ENSG00000164669	/	/	/	0	0	/
BRI3	protein_coding	ENSG00000164713	ENST00000297290	1,2,3	1	4	378	/
HNF4G	protein_coding	ENSG00000164749	ENST00000396423	2,3,4,5,6,8,9,10	0.8	10	912	/
PHKG1	protein_coding	ENSG00000164776	ENST00000452681	8.9	0.181818	2	162	Glycogen storage disease due to muscle phosphorylase kinase deficiency
SPIDR	protein_coding	ENSG00000164808	ENST00000297423	2,3,4,5	0.2	6	492	46XX gonadal dysgenesis
OXR1	protein_coding	ENSG00000164830	/	/	/	0	0	/
TMEM74	protein_coding	ENSG00000164841	/	/	/	0	0	/
SPAG11B	protein_coding	ENSG00000164871	ENST00000398462	1,2,3	1	14	696	/
CDK5	protein_coding	ENSG00000164885	ENST00000485972	6,8,12	0.25	4	280	LISSENCEPHALY 7 WITH CEREBELLAR HYPOPLASIA
DCAF13	protein_coding	ENSG00000164934	/	/	/	0	0	/
METTL2B	protein_coding	ENSG00000165055	ENST00000262432	3,4,5,6	0.444444	4	607	/
KIF27	protein_coding	ENSG00000165115	ENST00000297814	11,13,14,17,18	0.277778	7	1286	/
AL353743.1	transcribed_unprocessed_pseudogene	ENSG00000165121	/	/	/	0	0	/
DYNLT3	protein_coding	ENSG00000165169	/	/	/	0	0	/
NCF1C	unprocessed_pseudogene	ENSG00000165178	/	/	/	0	0	/
NLGN4Y	protein_coding	ENSG00000165246	/	/	/	4	1640	/
NDUFB6	protein_coding	ENSG00000165264	/	/	/	0	0	/
TRMT10B	protein_coding	ENSG00000165275	ENST00000297994	3.5	0.222222	2	203	/
LRFN5	protein_coding	ENSG00000165379	/	/	/	0	0	/
TSHR	protein_coding	ENSG00000165409	/	/	/	0	0	Athyreosis/Familial gestational hyperthyroidism/Familial hyperthyroidism due to mutations in TSH receptor/Hypothyroidism due to TSH receptor mutations/Thyroid hypoplasia/HYPERTHYROIDISM FAMILIAL GESTATIONAL/HYPERTHYROIDISM NONAUTOIMMUNE/HYPOTHYROIDISM CONGENITAL NONGOITROUS 1
SUGT1	protein_coding	ENSG00000165416	/	/	/	0	0	/
MICU2	protein_coding	ENSG00000165487	/	/	/	0	0	/
KBTBD6	protein_coding	ENSG00000165572	ENST00000379485	1	1	1	1278	/
OTX2	protein_coding	ENSG00000165588	/	/	/	0	0	Agnathia-holoprosencephaly-situs inversus syndrome/Butterfly-shaped pigment dystrophy/Combined pituitary hormone deficiencies genetic forms/Isolated microphthalmia-anophthalmia-coloboma/Septo-optic dysplasia spectrum/Syndromic microphthalmia type 5/MICROPHTHALMIA SYNDROMIC 5/PITUITARY HORMONE DEFICIENCY COMBINED 6/MICROPHTHALMIA SYNDROMIC TYPE 5
FAAH2	protein_coding	ENSG00000165591	/	/	/	0	0	/
BEND7	protein_coding	ENSG00000165626	ENST00000341083	6	0.111111	1	208	/
ATP5F1C	protein_coding	ENSG00000165629	ENST00000356708	3,4,5,7,8	0.5	5	734	/
NSD1	protein_coding	ENSG00000165671	/	/	/	0	0	5q35 microduplication syndrome/Beckwith-Wiedemann syndrome due to NSD1 mutation/Deletion 5q35/SOTOS SYNDROME/Weaver syndrome/LEUKEMIA ACUTE MYELOID/SOTOS SYNDROME 1/BECKWITH-WIEDEMANN SYNDROME
PMPCA	protein_coding	ENSG00000165688	ENST00000371717	2,5,6,7,9,10,12,13	0.615385	9	1063	Autosomal recessive cerebelloparenchymal disorder type 3/Spinocerebellar ataxia autosomal recessive 2
BMS1	protein_coding	ENSG00000165733	/	/	/	0	0	Aplasia cutis congenita/APLASIA CUTIS CONGENITA NONSYNDROMIC
SHLD2P1	transcribed_unprocessed_pseudogene	ENSG00000165874	/	/	/	0	0	/
ISCA2	protein_coding	ENSG00000165898	ENST00000556816	3.4	0.5	5	299	Multiple mitochondrial dysfunctions syndrome type 4/MULTIPLE MITOCHONDRIAL DYSFUNCTIONS SYNDROME 4
SMCO2	protein_coding	ENSG00000165935	/	/	/	0	0	/
MOAP1	protein_coding	ENSG00000165943	/	/	/	0	0	/
CCDC38	protein_coding	ENSG00000165972	/	/	/	0	0	/
SMCO4	protein_coding	ENSG00000166002	ENST00000298966	3	0.333333	3	174	/
MAGEA9	protein_coding	ENSG00000166008	/	/	/	1	948	/
TRIM53BP	unprocessed_pseudogene	ENSG00000166013	/	/	/	0	0	/
JAM3	protein_coding	ENSG00000166086	/	/	/	0	0	Porencephaly-microcephaly-bilateral congenital cataract syndrome/Hemorrhagic destruction of the brain subependymal calcification and cataracts
TPTE	protein_coding	ENSG00000166157	/	/	/	2	114	/
OPN1MW2	protein_coding	ENSG00000166160	ENST00000369929	2,3,4,5	0.666667	4	872	/
CKB	protein_coding	ENSG00000166165	ENST00000348956	3.8	0.25	2	245	/
ALKBH3	protein_coding	ENSG00000166199	/	/	/	0	0	/
COX11	protein_coding	ENSG00000166260	ENST00000299335	1,2,3,4	1	7	838	/
STXBP4	protein_coding	ENSG00000166263	/	/	/	0	0	/
POTED	protein_coding	ENSG00000166351	ENST00000299443	1.11	0.181818	3	743	/
CLEC4D	protein_coding	ENSG00000166527	/	/	/	0	0	/
RIMKLB	protein_coding	ENSG00000166532	/	/	/	0	0	/
TMEM135	protein_coding	ENSG00000166575	/	/	/	0	0	Autosomal Recessive Mental Retardation
CHRFAM7A	protein_coding	ENSG00000166664	ENST00000299847	5,6,7,8,9,10	0.6	9	1159	/
ZNF592	protein_coding	ENSG00000166716	ENST00000560079	11	0.0909091	2	531	CAMOS syndrome
CASC4	protein_coding	ENSG00000166734	ENST00000299957	1,3,4,5,7,8,9,10	0.8	11	1175	/
CATSPER2	protein_coding	ENSG00000166762	ENST00000381761	1,2,3,4,5,6,7,8,9,10,11,12,13	1	18	1611	Deafness-infertility syndrome/SPERMATOGENIC FAILURE 7
STRCP1	unprocessed_pseudogene	ENSG00000166763	/	/	/	0	0	/
RBPMS2	protein_coding	ENSG00000166831	ENST00000300069	5.6	0.25	3	300	/
GLYATL1	protein_coding	ENSG00000166840	ENST00000300079	1.2	0.285714	2	148	/
AKTIP	protein_coding	ENSG00000166971	ENST00000300245	4	0.0909091	1	95	/
TCP10L2	protein_coding	ENSG00000166984	ENST00000366832	3,4,5,6,7,8	0.75	6	918	/
PDIA3	protein_coding	ENSG00000167004	ENST00000300289	1,4,5,6,8,9,13	0.538462	7	893	/
B4GALNT2	protein_coding	ENSG00000167080	/	/	/	0	0	/
GOLGA6C	protein_coding	ENSG00000167195	ENST00000300576	1,2,3,11	0.222222	4	633	/
TBC1D2B	protein_coding	ENSG00000167202	ENST00000300584	13	0.0769231	2	196	/
KATNAL2	protein_coding	ENSG00000167216	/	/	/	0	0	/
ZNF91	protein_coding	ENSG00000167232	ENST00000300619	4	0.25	2	1473	/
DUS2	protein_coding	ENSG00000167264	/	/	/	0	0	/
MMP26	protein_coding	ENSG00000167346	/	/	/	0	0	/
PPP2R3B	protein_coding	ENSG00000167393	ENST00000390665	1,2,3,4,5,6,7,8,9,10,11,12,13	1	13	3456	/
ZNF646	protein_coding	ENSG00000167395	ENST00000300850	2.3	0.666667	3	876	/
TPM4	protein_coding	ENSG00000167460	ENST00000646974	3	0.111111	2	227	Autosomal dominant macrothrombocytopenia/Inflammatory myofibroblastic tumor
ANKRD11	protein_coding	ENSG00000167522	ENST00000301030	13	0.0769231	2	130	16q24,3 microdeletion syndrome/KBG syndrome
TUBA1C	protein_coding	ENSG00000167553	ENST00000541364	4	0.25	3	709	/
ZNF701	protein_coding	ENSG00000167562	ENST00000540331	4	0.2	1	127	/
LAIR1	protein_coding	ENSG00000167613	/	/	/	1	16	/
LAIR2	protein_coding	ENSG00000167618	/	/	/	0	0	/
KIR3DL1	protein_coding	ENSG00000167633	ENST00000391728	2,3,4	0.333333	3	621	HUMAN IMMUNODEFICIENCY VIRUS TYPE 1 SUSCEPTIBILITY TO
ZNF444	protein_coding	ENSG00000167685	ENST00000337080	3	0.2	1	297	/
NXN	protein_coding	ENSG00000167693	ENST00000336868	6.7	0.25	2	246	Autosomal recessive Robinow syndrome
C3P1	transcribed_unprocessed_pseudogene	ENSG00000167798	/	/	/	0	0	/
AC009065.1	protein_coding	ENSG00000167970	/	/	/	3	537	/
KCTD5	protein_coding	ENSG00000167977	ENST00000301738	2	0.166667	1	109	/
KIAA1586	protein_coding	ENSG00000168116	ENST00000370733	1.2	0.5	3	105	/
TTC39C	protein_coding	ENSG00000168234	ENST00000317571	9.11	0.142857	2	208	/
UBTD2	protein_coding	ENSG00000168246	/	/	/	0	0	/
POLR2J3	protein_coding	ENSG00000168255	/	/	/	3	441	/
BMI1	protein_coding	ENSG00000168283	ENST00000376663	2.6	0.2	2	198	/
PCMTD1	protein_coding	ENSG00000168300	ENST00000360540	6	0.142857	1	124	/
ARF4	protein_coding	ENSG00000168374	/	/	/	0	0	/
2002-09-01	protein_coding	ENSG00000168385	ENST00000616972	9	0.0714286	1	102	/
STIP1	protein_coding	ENSG00000168439	ENST00000358794	2,3,4,5,6,7,8,9,10,12,13,14	0.857143	15	1594	/
RAB31	protein_coding	ENSG00000168461	/	/	/	0	0	/
TNXB	protein_coding	ENSG00000168477	ENST00000451343	1,2,3,4,5,6,7,8,9,10,11,12,13	1	16	2129	Classical-like Ehlers-Danlos syndrome type 1/EHLERS-DANLOS SYNDROME HYPERMOBILITY TYPE/Familial vesicoureteral reflux/EHLERS-DANLOS SYNDROME CLASSIC-LIKE/Vesicoureteral reflux 8
POLR3D	protein_coding	ENSG00000168495	ENST00000397802	3,4,5,6,7,8	0.75	7	879	/
FEN1	protein_coding	ENSG00000168496	ENST00000305885	2	0.5	1	1143	/
MTCL1	protein_coding	ENSG00000168502	ENST00000359865	15	0.0588235	2	1023	/
FNTA	protein_coding	ENSG00000168522	ENST00000302279	1,8,9	0.333333	4	436	/
GFRA2	protein_coding	ENSG00000168546	ENST00000524240	1,2,3	0.333333	6	439	/
VWA3B	protein_coding	ENSG00000168658	/	/	/	0	0	Spinocerebellar ataxia autosomal recessive 22
GSTM4	protein_coding	ENSG00000168765	/	/	/	1	90	/
PPIP5K1	protein_coding	ENSG00000168781	ENST00000420765	3,4,5,6,7,8,9,10,11,12,13,14,15,16,17,18,19,20,21,22,23,24,25,26,27,28	0.83871	30	3247	/
CHTF8	protein_coding	ENSG00000168802	ENST00000448552	4	0.25	4	348	/
TPTE2P5	transcribed_unprocessed_pseudogene	ENSG00000168852	/	/	/	0	0	/
DDX19A	protein_coding	ENSG00000168872	ENST00000302243	11	0.0833333	1	192	/
ANKRD49	protein_coding	ENSG00000168876	/	/	/	0	0	/
BTNL3	protein_coding	ENSG00000168903	ENST00000342868	6.7	0.25	2	54	/
LETM1	protein_coding	ENSG00000168924	ENST00000302787	3,4,5,6,7,8,9,10,11,12,13,14	0.857143	12	1901	Wolf-Hirschhorn syndrome
CTRB1	protein_coding	ENSG00000168925	ENST00000361017	2,3,4,5,6	0.714286	5	564	/
CTRB2	protein_coding	ENSG00000168928	ENST00000303037	2,3,4,5,6	0.714286	5	564	/
TRIM49	protein_coding	ENSG00000168930	ENST00000329758	3,4,6,8	0.5	5	1030	/
SPRY3	protein_coding	ENSG00000168939	ENST00000302805	2	0.5	1	1734	/
GRM5	protein_coding	ENSG00000168959	ENST00000305447	2	0.111111	1	250	/
LGALS9	protein_coding	ENSG00000168961	ENST00000395473	2,6,7	0.272727	3	179	/
UQCRFS1	protein_coding	ENSG00000169021	ENST00000304863	2	0.5	1	160	/
MAP2K1	protein_coding	ENSG00000169032	ENST00000307102	1,2,3,6,7,11	0.545455	7	879	CARDIOFACIOCUTANEOUS SYNDROME/CARDIOFACIOCUTANEOUS SYNDROME 3/NOONAN SYNDROME 1
VCX3A	protein_coding	ENSG00000169059	ENST00000381089	3	0.333333	6	498	/
DHRSX	protein_coding	ENSG00000169084	ENST00000334651	2,3,4,5,6,7	0.857143	6	1768	/
ASMTL	protein_coding	ENSG00000169093	ENST00000381317	1,2,3,4,5,6,7,8,9,11,12,13	0.923077	15	3466	/
SLC25A6	protein_coding	ENSG00000169100	ENST00000381401	1,2,3,4	1	4	1794	/
ARMC4	protein_coding	ENSG00000169126	ENST00000305242	2,8,9,10	0.2	4	674	Primary ciliary dyskinesia/CILIARY DYSKINESIA PRIMARY 23
ZNF354A	protein_coding	ENSG00000169131	ENST00000335815	2.5	0.4	2	1185	/
CCDC126	protein_coding	ENSG00000169193	/	/	/	0	0	/
RP11-231C14.4	protein_coding	ENSG00000169203	/	/	/	1	717	/
CA5B	protein_coding	ENSG00000169239	/	/	/	0	0	/
NPIPB3	protein_coding	ENSG00000169246	ENST00000542817	1	0.5	1	565	/
ZRSR2	protein_coding	ENSG00000169249	ENST00000307771	8,10,11	0.272727	3	832	/
NMD3	protein_coding	ENSG00000169251	ENST00000472947	3	0.0588235	1	135	/
B3GALNT1	protein_coding	ENSG00000169255	ENST00000652730	6	0.166667	31	579	BLOOD GROUP GLOBOSIDE SYSTEM/BLOOD GROUP P1PK SYSTEM P(1) PHENOTYPE INCLUDED
KCNAB1	protein_coding	ENSG00000169282	/	/	/	0	0	/
RSPH10B2	protein_coding	ENSG00000169402	ENST00000403107	2,3,4,5,6,7,8,9,10,11,12,13,14,15,16,17,18,19,20	0.95	22	2613	/
CLIC4	protein_coding	ENSG00000169504	/	/	/	0	0	/
METTL15	protein_coding	ENSG00000169519	ENST00000407364	6	0.142857	2	122	/
CT55	protein_coding	ENSG00000169551	ENST00000276241	5.6	0.333333	3	262	/
ZEB2	protein_coding	ENSG00000169554	ENST00000627532	8,9,10	0.3	11	1135	Mowat-Wilson syndrome due to a ZEB2 point mutation/Mowat-Wilson syndrome due to monosomy 2q22/MOWAT-WILSON SYNDROME
DFFB	protein_coding	ENSG00000169598	/	/	/	0	0	/
NFU1	protein_coding	ENSG00000169599	/	/	/	0	0	Multiple mitochondrial dysfunctions syndrome type 1/Multiple mitochondrial dysfunctions syndrome 1
C15orf40	protein_coding	ENSG00000169609	/	/	/	0	0	/
RAMAC	protein_coding	ENSG00000169612	ENST00000304191	4	0.25	1	183	/
BOLA2B	protein_coding	ENSG00000169627	ENST00000305321	1,2,3	1	8	463	/
HIC2	protein_coding	ENSG00000169635	ENST00000443632	1	0.5	2	26	/
BCRP2	transcribed_unprocessed_pseudogene	ENSG00000169668	/	/	/	0	0	/
HNRNPF	protein_coding	ENSG00000169813	ENST00000443950	3	0.333333	2	562	/
OTUD7A	protein_coding	ENSG00000169918	ENST00000307050	1	0.0909091	1	151	15q13,3 deletions phenocopy
GUSB	protein_coding	ENSG00000169919	/	/	/	0	0	Mucopolysaccharidosis type 7/MUCOPOLYSACCHARIDOSIS TYPE VII
ZFPM2	protein_coding	ENSG00000169946	/	/	/	0	0	46XY partial gonadal dysgenesis/Congenital diaphragmatic hernia/Tetralogy of Fallot/46XY sex reversal 9/DIAPHRAGMATIC HERNIA 3/46XY GONADAL DYSGENESIS
HSFY2	protein_coding	ENSG00000169953	/	/	/	3	231	SPERMATOGENIC FAILURE Y-LINKED 2
FAM153A	protein_coding	ENSG00000170074	ENST00000440605	6,7,8,9,10,11,12,13,16,17,18,19,20	0.65	18	733	/
SIMC1	protein_coding	ENSG00000170085	ENST00000429602	2,3,4	0.3	6	1605	/
AC106795.1	transcribed_unprocessed_pseudogene	ENSG00000170089	/	/	/	0	0	/
NIPA1	protein_coding	ENSG00000170113	/	/	/	0	0	Autosomal dominant spastic paraplegia type 6/SPASTIC PARAPLEGIA 6 AUTOSOMAL DOMINANT
CCDC144A	protein_coding	ENSG00000170160	ENST00000360524	7,8,9,10,11,12,13,15,16,17	0.555556	12	2220	/
GYPA	protein_coding	ENSG00000170180	ENST00000360771	1	0.142857	6	37	BLOOD GROUP MN/MALARIA SUSCEPTIBILITY TO MALARIA RESISTANCE TO INCLUDED
PWWP2A	protein_coding	ENSG00000170234	ENST00000307063	2	0.5	2	1026	/
PDCD6IP	protein_coding	ENSG00000170248	ENST00000457054	10	0.0555556	1	108	/
GLB1	protein_coding	ENSG00000170266	/	/	/	0	0	GM1 gangliosidosis type 1/GM1 gangliosidosis type 2/GM1 gangliosidosis type 3/Mucopolysaccharidosis type 4B/GM1-GANGLIOSIDOSIS TYPE I/GM1-GANGLIOSIDOSIS TYPE II/GM1-GANGLIOSIDOSIS TYPE III/MUCOPOLYSACCHARIDOSIS TYPE IVB/GM1-GANGLIOSIDOSIS TYPE 1
CNGB3	protein_coding	ENSG00000170289	/	/	/	0	0	Achromatopsia/Progressive cone dystrophy/STARGARDT DISEASE/Achromatopsia 3/STARGARDT DISEASE 1
LGALS9B	protein_coding	ENSG00000170298	ENST00000324290	2,3,4,6,7,8,9,10,11	0.818182	11	936	/
STX8	protein_coding	ENSG00000170310	ENST00000306357	5.6	0.25	3	185	/
UBB	protein_coding	ENSG00000170315	ENST00000302182	2	0.5	4	248	Bifid uvula/Cleft hard palate/Cleft velum/Submucosal cleft palate
B3GNT2	protein_coding	ENSG00000170340	ENST00000301998	2	0.5	2	660	/
CST2	protein_coding	ENSG00000170369	ENST00000304725	3	0.333333	1	62	/
TCAF2	protein_coding	ENSG00000170379	ENST00000441159	1.3	0.285714	5	990	/
KRT8	protein_coding	ENSG00000170421	/	/	/	0	0	CIRRHOSIS FAMILIAL/CIRRHOSIS FAMILIALCIRRHOSIS FAMILIAL WITH PULMONARY HYPERTENSION INCLUDED
ADORA2B	protein_coding	ENSG00000170425	ENST00000304222	2	0.5	1	156	/
KRT86	protein_coding	ENSG00000170442	ENST00000423955	3,4,5	0.272727	4	639	MONILETHRIX
KRT6C	protein_coding	ENSG00000170465	ENST00000252250	1.2	0.222222	2	645	Autosomal dominant focal non-epidermolytic palmoplantar keratoderma with plantar blistering/Palmoplantar keratoderma nonepidermolytic focal or diffuse
PYM1	protein_coding	ENSG00000170473	/	/	/	0	0	/
ARL6IP1	protein_coding	ENSG00000170540	/	/	/	0	0	Autosomal recessive spastic paraplegia type 61/SPASTIC PARAPLEGIA 61 AUTOSOMAL RECESSIVE
SMAGP	protein_coding	ENSG00000170545	/	/	/	0	0	/
EMB	protein_coding	ENSG00000170571	ENST00000303221	1,3,4,5,6,7,8,9	0.888889	12	900	/
DLGAP1	protein_coding	ENSG00000170579	/	/	/	0	0	/
ARMC10	protein_coding	ENSG00000170632	ENST00000323716	3,4,5,7	0.571429	7	716	/
RASA4B	protein_coding	ENSG00000170667	ENST00000541662	1,2,3,4,5,6,7,8,9,10,11	0.55	14	1064	/
BOP1	protein_coding	ENSG00000170727	/	/	/	16	2003	/
POLH	protein_coding	ENSG00000170734	/	/	/	0	0	Xeroderma pigmentosum variant/XERODERMA PIGMENTOSUM VARIANT TYPE
CELP	transcribed_unprocessed_pseudogene	ENSG00000170827	/	/	/	0	0	/
USP32	protein_coding	ENSG00000170832	ENST00000300896	17,18,20,21,22,23,24,25,26	0.264706	9	1307	/
CEL	protein_coding	ENSG00000170835	ENST00000372080	1,8,9,10,11	0.454545	5	1024	MODY/MATURITY-ONSET DIABETES OF THE YOUNG TYPE 8 WITH EXOCRINE DYSFUNCTION
TRIAP1	protein_coding	ENSG00000170855	/	/	/	0	0	/
LSM3	protein_coding	ENSG00000170860	/	/	/	0	0	/
RPS9	protein_coding	ENSG00000170889	ENST00000391752	3,4,5,6	0.8	6	403	/
TPT1-AS1	lncRNA	ENSG00000170919	/	/	/	0	0	/
ZNF415	protein_coding	ENSG00000170954	/	/	/	0	0	/
OBP2B	protein_coding	ENSG00000171102	ENST00000618116	1,2,3	0.428571	5	277	/
HSFX1	protein_coding	ENSG00000171116	ENST00000370416	1.2	1	2	1272	/
KCNMB3	protein_coding	ENSG00000171121	ENST00000314235	4	0.25	5	452	/
ATP6V0E2	protein_coding	ENSG00000171130	/	/	/	0	0	/
SMR3B	protein_coding	ENSG00000171201	ENST00000614072	2	0.333333	1	54	/
OR1L6	protein_coding	ENSG00000171459	ENST00000304720	2	0.5	2	1002	/
SPACA5B	protein_coding	ENSG00000171478	ENST00000304270	1,2,3,4	1	4	480	/
NLRP5	protein_coding	ENSG00000171487	ENST00000390649	5.6	0.133333	3	171	Multilocus imprinting disorder
SPACA5	protein_coding	ENSG00000171489	ENST00000304355	2,3,4,5	0.8	6	480	/
ECEL1	protein_coding	ENSG00000171551	ENST00000304546	3.4	0.111111	2	156	Distal arthrogryposis type 5D/ARTHROGRYPOSIS DISTAL TYPE 5D
CLSTN1	protein_coding	ENSG00000171603	/	/	/	0	0	/
SLC25A33	protein_coding	ENSG00000171612	ENST00000302692	6	0.142857	1	158	/
BPTF	protein_coding	ENSG00000171634	ENST00000306378	6.7	0.0714286	5	488	17q24,2 microdeletion syndrome/Non-specific syndromic intellectual disability/NEURODEVELOPMENTAL DISORDER WITH DYSMORPHIC FACIES AND DISTAL LIMB ANOMALIES/Developmental and Speech Delay Postnatal Microcephaly and Dysmorphic Features
ZIK1	protein_coding	ENSG00000171649	ENST00000597850	3.4	0.5	6	720	/
DEFB4A	protein_coding	ENSG00000171711	ENST00000302247	1.2	1	2	195	/
PTEN	protein_coding	ENSG00000171862	ENST00000371953	1.9	0.222222	2	259	Activated PI3K-delta syndrome/Bannayan-Riley-Ruvalcaba syndrome/COWDEN SYNDROME/Hereditary breast and ovarian cancer syndrome/Juvenile polyposis of infancy/LHERMITTE-DUCLOS DISEASE/Macrocephaly-intellectual disability-autism syndrome/Proteus syndrome/Proteus-like syndrome/Segmental outgrowth-lipomatosis-arteriovenous malformation-epidermal nevus syndrome/Squamous cell carcinoma of salivary glands…
KLF17	protein_coding	ENSG00000171872	ENST00000372299	2.3	0.5	2	1008	/
FRMD5	protein_coding	ENSG00000171877	/	/	/	0	0	/
MIR31HG	lncRNA	ENSG00000171889	/	/	/	0	0	/
LGALS9C	protein_coding	ENSG00000171916	ENST00000328114	2,3,4,6,7,8,9,10,11	0.818182	13	936	/
TVP23B	protein_coding	ENSG00000171928	ENST00000307767	3.4	0.285714	3	235	/
FBXW10	protein_coding	ENSG00000171931	ENST00000395665	1,2,3,4,7,8,9,14	0.571429	12	2382	/
OR10H2	protein_coding	ENSG00000171942	ENST00000305899	1	1	1	641	/
SRGAP2C	pseudogene	ENSG00000171943	/	/	/	0	0	/
PPIH	protein_coding	ENSG00000171960	ENST00000304979	6.9	0.2	2	162	/
ANKRD20A4	protein_coding	ENSG00000172014	ENST00000357336	2.3	0.133333	3	341	/
SERF1A	protein_coding	ENSG00000172058	ENST00000354833	1,2,3	1	13	540	/
SMN1	protein_coding	ENSG00000172062	ENST00000380707	1,2,3,4,5,6,7,8	0.888889	16	951	Proximal spinal muscular atrophy type 1/Proximal spinal muscular atrophy type 2/Proximal spinal muscular atrophy type 3/Proximal spinal muscular atrophy type 4/SPINAL MUSCULAR ATROPHY TYPE I/SPINAL MUSCULAR ATROPHY TYPE II/SPINAL MUSCULAR ATROPHY TYPE III/SPINAL MUSCULAR ATROPHY TYPE IV
CD8B	protein_coding	ENSG00000172116	ENST00000331469	3	0.166667	2	103	/
SNTB1	protein_coding	ENSG00000172164	/	/	/	0	0	/
MALT1	protein_coding	ENSG00000172175	/	/	/	0	0	Combined immunodeficiency due to MALT1 deficiency/MALT lymphoma/Immunodeficiency 12
TPSAB1	protein_coding	ENSG00000172236	ENST00000338844	2,3,4,5,6	0.833333	6	849	/
PAIP1	protein_coding	ENSG00000172239	ENST00000306846	3,6,7,11	0.363636	7	458	/
SERHL	transcribed_unitary_pseudogene	ENSG00000172250	/	/	/	0	0	/
MACROD2	protein_coding	ENSG00000172264	/	/	/	0	0	/
SUCLG2	protein_coding	ENSG00000172340	/	/	/	0	0	/
RSPH9	protein_coding	ENSG00000172426	/	/	/	0	0	Primary ciliary dyskinesia/CILIARY DYSKINESIA PRIMARY 12
HSFY1	protein_coding	ENSG00000172468	ENST00000307393	1.2	1	7	1035	SPERMATOGENIC FAILURE Y-LINKED 2
RAB40A	protein_coding	ENSG00000172476	ENST00000372633	1	1	2	834	/
PDE3A	protein_coding	ENSG00000172572	/	/	/	0	0	Brachydactyly-arterial hypertension syndrome/HYPERTENSION AND BRACHYDACTYLY SYNDROME
WASHC2C	protein_coding	ENSG00000172661	ENST00000623400	22	0.0322581	1	153	/
SLFN11	protein_coding	ENSG00000172716	ENST00000394566	6.7	0.285714	2	795	/
TMCC1	protein_coding	ENSG00000172765	ENST00000393238	3,4,6	0.5	7	965	/
RAB43	protein_coding	ENSG00000172780	ENST00000315150	2.3	0.666667	2	435	/
CBWD1	protein_coding	ENSG00000172785	ENST00000377400	3	0.0666667	2	101	/
ZBTB8OSP2	processed_pseudogene	ENSG00000172799	/	/	/	0	0	/
SP3	protein_coding	ENSG00000172845	ENST00000310015	4,5,6,7	0.571429	7	1985	/
NBEA	protein_coding	ENSG00000172915	ENST00000400445	8,11,12,13,17	0.0862069	5	628	NBEA Neurodevelopment disorder with seizures
RNASEH2C	protein_coding	ENSG00000172922	ENST00000308418	2.4	0.5	3	191	Aicardi-Goutieres syndrome/AICARDI-GOUTIERES SYNDROME 3
XKR3	protein_coding	ENSG00000172967	ENST00000331428	4	0.25	1	791	/
FRG2C	protein_coding	ENSG00000172969	ENST00000308062	1,2,3,4	1	5	849	/
KAT5	protein_coding	ENSG00000172977	/	/	/	0	0	/
HPSE2	protein_coding	ENSG00000172987	/	/	/	0	0	Ochoa syndrome/UROFACIAL SYNDROME 1/UROFACIAL SYNDROME
ZNF680	protein_coding	ENSG00000173041	ENST00000309683	4	0.25	1	1000	/
HSPA6	protein_coding	ENSG00000173110	ENST00000309758	1	1	1	1820	/
ADCK5	protein_coding	ENSG00000173137	/	/	/	0	0	/
ESRRA	protein_coding	ENSG00000173153	/	/	/	0	0	/
MTX1	protein_coding	ENSG00000173171	ENST00000368376	2,3,4,5,6,7,8	0.875	8	864	/
TUBB8P12	protein_coding	ENSG00000173213	ENST00000308911	4	0.25	1	603	/
MFSD4B	protein_coding	ENSG00000173214	ENST00000368847	4	0.25	1	261	/
GLRX	protein_coding	ENSG00000173221	/	/	/	0	0	/
SLC2A14	protein_coding	ENSG00000173262	ENST00000539924	8	0.1	2	102	/
MZT2A	protein_coding	ENSG00000173272	ENST00000309451	1.2	0.666667	2	319	/
SAA1	protein_coding	ENSG00000173432	ENST00000405158	3	0.25	2	143	AA amyloidosis
ZNF417	protein_coding	ENSG00000173480	ENST00000312026	2	0.333333	2	130	/
MST1	protein_coding	ENSG00000173531	ENST00000449682	1,2,3,4,5,6,7,8,9,10,11,12,13,14,15,16,17,18	1	18	2178	Primary sclerosing cholangitis
CSPG4	protein_coding	ENSG00000173546	/	/	/	0	0	/
CEP83	protein_coding	ENSG00000173588	/	/	/	0	0	Infantile nephronophthisis/NEPHRONOPHTHISIS 18/INFANTILE NEPHRONOPHTHISIS AND INTELLECTUAL DISABILITY
NUDT4	protein_coding	ENSG00000173598	ENST00000337179	1,2,5	0.6	8	413	/
NMNAT1	protein_coding	ENSG00000173614	/	/	/	0	0	Cone rod dystrophy/Leber congenital amaurosis/LEBER CONGENITAL AMAUROSIS 9
SPDYE2B	protein_coding	ENSG00000173678	ENST00000507450	3,7,8	0.333333	4	673	/
STAT5B	protein_coding	ENSG00000173757	ENST00000293328	6,7,8,9	0.210526	4	581	ACUTE PROMYELOCYTIC LEUKEMIA/Laron syndrome with immunodeficiency/GROWTH HORMONE INSENSITIVITY WITH IMMUNODEFICIENCY
EIF1	protein_coding	ENSG00000173812	/	/	/	0	0	/
DPY19L1	protein_coding	ENSG00000173852	ENST00000310974	4,8,9,10,11,12,13,18,22	0.409091	10	820	/
AC013489.1	protein_coding	ENSG00000173867	/	/	/	0	0	/
RBM4B	protein_coding	ENSG00000173914	ENST00000525754	1	0.333333	3	172	/
ATP5MD	protein_coding	ENSG00000173915	ENST00000369825	4.5	0.333333	2	177	/
RBM4	protein_coding	ENSG00000173933	ENST00000409406	1	0.333333	4	171	/
LRRC63	protein_coding	ENSG00000173988	/	/	/	0	0	/
TLR1	protein_coding	ENSG00000174125	ENST00000308979	4	0.25	2	655	LEPROSY SUSCEPTIBILITY TO 5
TLR6	protein_coding	ENSG00000174130	ENST00000436693	2	0.5	2	657	/
AGAP8	protein_coding	ENSG00000174194	/	/	/	0	0	/
PMS2P2	pseudogene	ENSG00000174368	/	/	/	0	0	/
RALGAPA1	protein_coding	ENSG00000174373	ENST00000637992	1,2,6,7,8,9,10,11,12,13,14,15,16,17,18,19,20,21,22,23,24,25,26,28,29,31,32,33,35,36,37,38,39	0.804878	40	5908	/
GTF2IRD2B	protein_coding	ENSG00000174428	ENST00000472837	2	0.0625	2	104	/
SNAPC5	protein_coding	ENSG00000174446	ENST00000316634	2.3	0.666667	4	185	/
ANKRD36C	protein_coding	ENSG00000174501	ENST00000456556	14,16,18,19,21,22,23,24,31,32,43,44	0.179104	14	708	/
VN1R6P	unitary_pseudogene	ENSG00000174677	/	/	/	0	0	/
TMEM167A	protein_coding	ENSG00000174695	ENST00000502346	2.4	0.5	2	181	/
SRP72	protein_coding	ENSG00000174780	/	/	/	0	0	Autosomal dominant aplasia and myelodysplasia/BONE MARROW FAILURE SYNDROME 1
PDZK1	protein_coding	ENSG00000174827	ENST00000417171	3,4,5,6,7,8,9	0.777778	8	1350	/
DNAH12	protein_coding	ENSG00000174844	/	/	/	0	0	/
AMY1B	protein_coding	ENSG00000174876	ENST00000330330	4,5,7,8	0.363636	4	652	/
OR5M3	protein_coding	ENSG00000174937	ENST00000641993	2	0.5	2	665	/
GPR149	protein_coding	ENSG00000174948	/	/	/	0	0	/
CA5A	protein_coding	ENSG00000174990	ENST00000649794	3,4,5,6,7	0.714286	7	578	Hyperammonemic encephalopathy due to carbonic anhydrase VA deficiency/CARBONIC ANHYDRASE VA DEFICIENCY HYPERAMMONEMIA DUE TO/Hyperammonemia due to carbonic anhydrase VA deficiency
TRAF6	protein_coding	ENSG00000175104	ENST00000526995	2,3,4,7	0.571429	5	1419	Autosomal dominant hypohidrotic ectodermal dysplasia
ZNF654	protein_coding	ENSG00000175105	/	/	/	0	0	/
TVP23C	protein_coding	ENSG00000175106	ENST00000225576	3.4	0.333333	3	235	/
GOLGA8A	protein_coding	ENSG00000175265	ENST00000359187	1,2,15	0.1875	3	300	/
ANKRD30BP1	unprocessed_pseudogene	ENSG00000175302	/	/	/	0	0	/
PHYKPL	protein_coding	ENSG00000175309	/	/	/	0	0	Phosphohydroxylysinuria
ZNF519	protein_coding	ENSG00000175322	/	/	/	0	0	/
CHRNA7	protein_coding	ENSG00000175344	ENST00000454250	5,6,7,8,9,10	0.6	11	1159	15q13,3 microdeletion syndrome/CHROMOSOME 15q13,3 DELETION SYNDROME
PTPN2	protein_coding	ENSG00000175354	ENST00000309660	2	0.111111	1	91	Oligoarticular juvenile idiopathic arthritis/Rheumatoid factor-negative juvenile idiopathic arthritis
EIF3F	protein_coding	ENSG00000175390	ENST00000533626	3	0.1	3	102	INTELLECTUAL DEVELOPMENTAL DISORDER AUTOSOMAL RECESSIVE 67
RFESD	protein_coding	ENSG00000175449	ENST00000458310	2,4,6	0.5	7	500	/
PPP2R2D	protein_coding	ENSG00000175470	/	/	/	3	258	/
AL078621.2	processed_pseudogene	ENSG00000175509	/	/	/	0	0	/
PNLIP	protein_coding	ENSG00000175535	ENST00000369221	4	0.0769231	1	3	PANCREATIC LIPASE DEFICIENCY
ALG10B	protein_coding	ENSG00000175548	/	/	/	1	12	LONG QT SYNDROME 2
MRPL48	protein_coding	ENSG00000175581	ENST00000310614	4,5,6,7,8	0.625	10	527	/
FOSL1	protein_coding	ENSG00000175592	ENST00000312562	2,3,4	0.75	7	717	/
SUGCT	protein_coding	ENSG00000175600	/	/	/	0	0	Glutaric acidemia type 3/GLUTARIC ACIDURIA III
DRD5P2	pseudogene	ENSG00000175658	/	/	/	0	0	/
GOLGA8EP	pseudogene	ENSG00000175676	/	/	/	0	0	/
TSPEAR	protein_coding	ENSG00000175894	/	/	/	0	0	Autosomal recessive non-syndromic sensorineural deafness type DFNB/DEAFNESS AUTOSOMAL RECESSIVE 98/ECTODERMAL DYSPLASIA 14 HAIR/TOOTH TYPE WITH OR WITHOUT HYPOHIDROSIS
TUBB6	protein_coding	ENSG00000176014	/	/	/	0	0	FACIAL PALSY CONGENITAL WITH PTOSIS AND VELOPHARYNGEAL DYSFUNCTION
YES1	protein_coding	ENSG00000176105	ENST00000584307	2,3,4,5,7,8,10,11,12	0.75	10	1413	/
AL445665.1	protein_coding	ENSG00000176134	ENST00000322495	4	0.25	1	57	/
ENTHD1	protein_coding	ENSG00000176177	/	/	/	0	0	/
CDV3P1	processed_pseudogene	ENSG00000176243	/	/	/	0	0	/
ZBTB8OS	protein_coding	ENSG00000176261	/	/	/	0	0	/
IDSP1	unprocessed_pseudogene	ENSG00000176289	/	/	/	0	0	/
OR4N2	protein_coding	ENSG00000176294	/	/	/	0	0	/
OR4M1	protein_coding	ENSG00000176299	ENST00000641200	2	0.5	2	942	/
FOXN3P1	processed_pseudogene	ENSG00000176318	/	/	/	0	0	/
CDC26	protein_coding	ENSG00000176386	ENST00000374206	4	0.25	1	169	/
CRLF3	protein_coding	ENSG00000176390	/	/	/	0	0	/
CLK2	protein_coding	ENSG00000176444	ENST00000368361	2,6,7,8,9,12,13	0.538462	8	950	/
DMBT1P1	transcribed_unitary_pseudogene	ENSG00000176584	/	/	/	0	0	/
RMDN1	protein_coding	ENSG00000176623	/	/	/	0	0	/
RNF152	protein_coding	ENSG00000176641	ENST00000312828	2	0.5	1	612	/
NANOGP1	transcribed_unprocessed_pseudogene	ENSG00000176654	/	/	/	0	0	/
TGIF2LY	protein_coding	ENSG00000176679	ENST00000559055	1	1	2	558	/
LRRC37A	protein_coding	ENSG00000176681	ENST00000320254	1,7,9,10,12,13,14	0.5	10	4409	/
AC008977.1	protein_coding	ENSG00000176695	ENST00000585993	3	0.333333	4	981	/
SCAND2P	transcribed_unprocessed_pseudogene	ENSG00000176700	/	/	/	0	0	/
TTTY14	lncRNA	ENSG00000176728	/	/	/	0	0	/
MAGEB6	protein_coding	ENSG00000176746	ENST00000379034	2	0.5	1	760	/
DEFB104A	protein_coding	ENSG00000176782	ENST00000314265	1.2	1	2	219	/
BASP1	protein_coding	ENSG00000176788	ENST00000322611	2	0.5	2	541	/
DEFB103A	protein_coding	ENSG00000176797	ENST00000314357	1.2	1	2	204	/
LRRC37A3	protein_coding	ENSG00000176809	ENST00000584306	3,8,9	0.214286	4	2544	/
FKBP9P1	transcribed_unprocessed_pseudogene	ENSG00000176826	/	/	/	0	0	/
GJA1P1	processed_pseudogene	ENSG00000176857	/	/	/	0	0	/
TOB2P1	processed_pseudogene	ENSG00000176933	/	/	/	0	0	/
MUC20	protein_coding	ENSG00000176945	ENST00000447234	1.2	0.5	7	1704	/
SHMT1	protein_coding	ENSG00000176974	ENST00000316694	2,3,4,5,7,8,9,10,11,12	0.833333	16	1282	/
SMCR8	protein_coding	ENSG00000176994	/	/	/	0	0	/
HCG4	unprocessed_pseudogene	ENSG00000176998	/	/	/	0	0	/
DEFB104B	protein_coding	ENSG00000177023	ENST00000316169	1.2	1	2	219	/
FAM9B	protein_coding	ENSG00000177138	/	/	/	0	0	/
NUDT4B	protein_coding	ENSG00000177144	ENST00000322209	1	1	1	412	/
OR2T35	protein_coding	ENSG00000177151	ENST00000641268	2	0.5	2	972	/
DEFB103B	protein_coding	ENSG00000177243	ENST00000318124	1.2	1	2	204	/
DEFB4B	protein_coding	ENSG00000177257	ENST00000318157	1.2	1	2	195	/
OR2AJ1	protein_coding	ENSG00000177275	/	/	/	0	0	/
CLDN22	protein_coding	ENSG00000177300	ENST00000323319	1	1	1	180	/
AC004797.1	lncRNA	ENSG00000177369	/	/	/	0	0	/
PAWR	protein_coding	ENSG00000177425	/	/	/	0	0	/
TGIF1	protein_coding	ENSG00000177426	ENST00000330513	2.3	0.666667	11	749	Alobar holoprosencephaly/Lobar holoprosencephaly/Microform holoprosencephaly/Midline interhemispheric variant of holoprosencephaly/Semilobar holoprosencephaly/Septopreoptic holoprosencephaly/HOLOPROSENCEPHALY 4/Holoprosencephaly
ARIH2	protein_coding	ENSG00000177479	ENST00000356401	3,6,7,8,9,12,13,16	0.5	9	1105	/
GBA	protein_coding	ENSG00000177628	ENST00000327247	2,3,4,5,6,7,8,9,10,11,12	0.916667	16	1576	Fetal Gaucher disease/GAUCHER DISEASE TYPE 1/Gaucher disease type 2/Gaucher disease type 3/Gaucher disease-ophthalmoplegia-cardiovascular calcification syndrome/Hereditary late-onset Parkinson disease/DEMENTIA LEWY BODY/Gaucher disease perinatal lethal/GAUCHER DISEASE TYPE I/GAUCHER DISEASE TYPE II/GAUCHER DISEASE TYPE III/GAUCHER DISEASE TYPE IIIC/Parkinson disease late-onset/Gaucher disease/GAU…
THAP5	protein_coding	ENSG00000177683	ENST00000415914	2.3	0.666667	6	1108	/
OR4F4	protein_coding	ENSG00000177693	ENST00000326183	1	1	1	918	/
TENM3-AS1	lncRNA	ENSG00000177822	/	/	/	0	0	/
PCDHB9	protein_coding	ENSG00000177839	ENST00000316105	2	1	1	293	/
UBE2N	protein_coding	ENSG00000177889	ENST00000318066	2,3,4	0.75	7	443	/
GRAMD1C	protein_coding	ENSG00000178075	/	/	/	0	0	/
TWF1P1	processed_pseudogene	ENSG00000178082	/	/	/	0	0	/
PDE4DIP	protein_coding	ENSG00000178104	ENST00000369356	2,3,4	0.0681818	6	381	/
DDX10	protein_coding	ENSG00000178105	ENST00000322536	4	0.0555556	1	159	/
AL161668.1	lncRNA	ENSG00000178107	/	/	/	0	0	/
PPP1R42	protein_coding	ENSG00000178125	/	/	/	0	0	/
NDUFV2	protein_coding	ENSG00000178127	ENST00000318388	1,4,5,6	0.5	5	450	Isolated complex I deficiency/Leigh syndrome with leukodystrophy/MITOCHONDRIAL COMPLEX I DEFICIENCY NUCLEAR TYPE 7
ZNF114	protein_coding	ENSG00000178150	/	/	/	0	0	/
LCORL	protein_coding	ENSG00000178177	/	/	/	0	0	/
SH2B1	protein_coding	ENSG00000178188	/	/	/	0	0	Distal 16p11,2 microdeletion syndrome/Proximal 16p11,2 microdeletion syndrome/Severe early-onset obesity-insulin resistance syndrome due to SH2B1 deficiency
SPAG11A	protein_coding	ENSG00000178287	ENST00000326558	1,2,3,4	1	14	696	/
ZNF354B	protein_coding	ENSG00000178338	ENST00000322434	2.5	0.4	2	1183	/
BEND3	protein_coding	ENSG00000178409	ENST00000429433	5	0.2	2	138	/
GLDC	protein_coding	ENSG00000178445	ENST00000321612	1,3,4,6,7,8,9,10,12,15,17,18,19,20,21,22,23,25	0.72	23	2550	Atypical glycine encephalopathy/Infantile glycine encephalopathy/Neonatal glycine encephalopathy/GLYCINE ENCEPHALOPATHY/GLDC-Related Glycine Encephalopathy
NECAP1P1	processed_pseudogene	ENSG00000178503	/	/	/	0	0	/
SLC25A20	protein_coding	ENSG00000178537	ENST00000319017	1,3,5,8,9	0.555556	7	539	CARNITINE-ACYLCARNITINE TRANSLOCASE DEFICIENCY
OR6B3	protein_coding	ENSG00000178586	ENST00000641019	2	0.5	2	844	/
GTPBP6	protein_coding	ENSG00000178605	ENST00000326153	1,2,3,4,5,6	0.6	6	1724	/
ARMC10P1	processed_pseudogene	ENSG00000178660	/	/	/	0	0	/
SUZ12	protein_coding	ENSG00000178691	ENST00000322652	1,2,3,4,5,6,7,8,9	0.5625	10	927	Endometrial stromal sarcoma/Weaver syndrome/Weaver-like overgrowth syndrome
COX5A	protein_coding	ENSG00000178741	ENST00000322347	2,3,4	0.6	7	476	Isolated cytochrome C oxidase deficiency
TRIM73	protein_coding	ENSG00000178809	ENST00000323819	2,3,4,5	0.8	10	853	/
APOLD1	protein_coding	ENSG00000178878	/	/	/	0	0	/
ZNF852	protein_coding	ENSG00000178917	ENST00000436261	2.3	0.5	2	70	/
TPRX1	protein_coding	ENSG00000178928	ENST00000322175	1.2	1	5	293	/
LGALS7B	protein_coding	ENSG00000178934	ENST00000314980	1,2,3,4	1	4	411	/
ZNF552	protein_coding	ENSG00000178935	ENST00000391701	2.3	0.666667	2	557	/
TUFM	protein_coding	ENSG00000178952	ENST00000313511	2,3,4,5,6,8,9,10	0.8	8	1207	Combined oxidative phosphorylation defect type 4/COMBINED OXIDATIVE PHOSPHORYLATION DEFICIENCY 4
FBXO34	protein_coding	ENSG00000178974	/	/	/	0	0	/
SELENOW	protein_coding	ENSG00000178980	ENST00000601048	5	0.166667	2	81	/
C14orf39	protein_coding	ENSG00000179008	/	/	/	0	0	/
EDC3	protein_coding	ENSG00000179151	/	/	/	0	0	Autosomal recessive non-syndromic intellectual disability/MENTAL RETARDATION AUTOSOMAL RECESSIVE 50
FUCA1	protein_coding	ENSG00000179163	ENST00000374479	3,6,7	0.375	3	339	FUCOSIDOSIS
HNRNPCL1	protein_coding	ENSG00000179172	ENST00000317869	2	0.5	1	882	/
FAM156B	protein_coding	ENSG00000179304	ENST00000593751	4	0.25	2	642	/
CLK3	protein_coding	ENSG00000179335	ENST00000395066	7.13	0.153846	3	209	/
LINC00174	lncRNA	ENSG00000179406	/	/	/	0	0	/
HNRNPCL4	protein_coding	ENSG00000179412	ENST00000323770	2	1	1	882	/
GRM8	protein_coding	ENSG00000179603	ENST00000339582	5	0.0909091	1	155	/
DGKZP1	processed_pseudogene	ENSG00000179611	/	/	/	0	0	/
APOBEC3B	protein_coding	ENSG00000179750	ENST00000333467	3,4,6,8	0.5	7	946	/
ATP8B5P	transcribed_unprocessed_pseudogene	ENSG00000179766	/	/	/	0	0	/
MROH1	protein_coding	ENSG00000179832	ENST00000528919	14,15,16,17,18,19,20,21,22,23,24,25,26,27,28,29,30,31,32,33,34,36,37,38,39,40,41,42,43	0.674419	34	3426	/
PDXDC1	protein_coding	ENSG00000179889	ENST00000396410	8.12	0.0869565	2	205	/
PHC1P1	processed_pseudogene	ENSG00000179899	/	/	/	0	0	/
R3HDM2	protein_coding	ENSG00000179912	ENST00000403821	5,20,21,22	0.166667	4	491	/
SEPHS2	protein_coding	ENSG00000179918	ENST00000478753	1	1	1	910	/
GOLGA8J	protein_coding	ENSG00000179938	ENST00000567927	1	0.0526316	1	48	/
AC140134.1	unprocessed_pseudogene	ENSG00000179978	/	/	/	0	0	/
OR1E1	protein_coding	ENSG00000180016	ENST00000322608	1	1	1	147	/
ANKRD18A	protein_coding	ENSG00000180071	ENST00000399703	4	0.0625	1	107	/
HERC2P3	transcribed_unprocessed_pseudogene	ENSG00000180229	/	/	/	0	0	/
ZNRF2	protein_coding	ENSG00000180233	/	/	/	0	0	/
MCFD2	protein_coding	ENSG00000180398	ENST00000409105	4.5	0.4	9	288	Combined deficiency of factor V and factor VIII/FACTOR V AND FACTOR VIII COMBINED DEFICIENCY OF 2
TPRXL	transcribed_processed_pseudogene	ENSG00000180438	/	/	/	0	0	/
MIGA1	protein_coding	ENSG00000180488	/	/	/	0	0	/
SRP9P1	processed_pseudogene	ENSG00000180581	/	/	/	0	0	/
OR2A4	protein_coding	ENSG00000180658	ENST00000315453	1	1	1	933	/
EXOC5P1	processed_pseudogene	ENSG00000180673	/	/	/	0	0	/
ZDHHC20	protein_coding	ENSG00000180776	/	/	/	0	0	/
ANKRD30B	protein_coding	ENSG00000180777	ENST00000358984	1,2,3,4,5,6,7,31,32,33,36	0.305556	12	1614	/
ZNF443	protein_coding	ENSG00000180855	ENST00000301547	2,3,4	0.75	3	1516	/
PDIA3P1	transcribed_processed_pseudogene	ENSG00000180867	/	/	/	0	0	/
CXCR2	protein_coding	ENSG00000180871	ENST00000318507	3	0.333333	1	819	Autosomal recessive severe congenital neutropenia due to CXCR2 deficiency
PITPNB	protein_coding	ENSG00000180957	ENST00000634017	10.11	0.166667	3	222	/
AC004832.1	lncRNA	ENSG00000181123	/	/	/	0	0	/
HLA-V	transcribed_unprocessed_pseudogene	ENSG00000181126	/	/	/	0	0	/
MUC16	protein_coding	ENSG00000181143	ENST00000397910	24,25,26,27,31,32	0.0714286	6	611	/
DLSTP1	processed_pseudogene	ENSG00000181227	/	/	/	0	0	/
MTHFD2P7	processed_pseudogene	ENSG00000181260	/	/	/	0	0	/
ZNF322	protein_coding	ENSG00000181315	ENST00000622479	5	0.2	3	1209	/
NME9	protein_coding	ENSG00000181322	/	/	/	0	0	/
SLX1B	protein_coding	ENSG00000181625	ENST00000330181	1,2,3,4,5,6	1	7	828	/
ANKRD62	protein_coding	ENSG00000181626	ENST00000587848	11,12,13,14	0.285714	4	1514	/
KCTD9P2	processed_pseudogene	ENSG00000181819	/	/	/	0	0	/
GOLGA8CP	unprocessed_pseudogene	ENSG00000181984	/	/	/	0	0	/
MRPS11	protein_coding	ENSG00000181991	ENST00000325844	3,4,6	0.5	4	296	/
TRIM49B	protein_coding	ENSG00000182053	ENST00000622138	4	0.125	1	96	/
OR6B2	protein_coding	ENSG00000182083	ENST00000402971	1	1	1	844	/
WRB	protein_coding	ENSG00000182093	ENST00000649170	2	0.2	1	94	/
TNRC18	protein_coding	ENSG00000182095	ENST00000430969	6,7,8,9,10,11,12,13,16,17	0.333333	10	2590	/
P2RY8	protein_coding	ENSG00000182162	ENST00000381297	2	0.5	1	2160	/
FAM153B	protein_coding	ENSG00000182230	ENST00000515817	6,7,8,9,10,11,12,13,16,17,18,19,20	0.65	15	698	/
AP1S2	protein_coding	ENSG00000182287	ENST00000545766	6	0.166667	2	48	Fried syndrome/X-linked intellectual disability-Dandy-Walker malformation-basal ganglia disease-seizures syndrome/X-linked intellectual disability-hypotonia-facial dysmorphism-aggressive behavior syndrome/PETTIGREW SYNDROME/MENTAL RETARDATION X-LINKED TYPE 59
MBD3L3	protein_coding	ENSG00000182315	ENST00000333843	1	0.5	1	45	/
KIAA2012	protein_coding	ENSG00000182329	/	/	/	0	0	/
PRAMEF8	protein_coding	ENSG00000182330	ENST00000357367	2,3,4	0.75	3	1425	/
PDSS1P1	processed_pseudogene	ENSG00000182347	/	/	/	0	0	/
PLCXD1	protein_coding	ENSG00000182378	ENST00000381657	2,3,4,5,6,7	0.857143	8	1944	/
CAPN12	protein_coding	ENSG00000182472	/	/	/	0	0	/
EXOC7	protein_coding	ENSG00000182473	ENST00000335146	4,15,19	0.15	4	326	/
KPNA2	protein_coding	ENSG00000182481	ENST00000537025	3,8,9,10	0.363636	4	8	/
NCF1B	transcribed_unprocessed_pseudogene	ENSG00000182487	/	/	/	0	0	/
CLEC4G	protein_coding	ENSG00000182566	ENST00000328853	1,2,3,4,5,6	0.666667	6	478	/
SKA2	protein_coding	ENSG00000182628	ENST00000330137	3.4	0.5	8	254	/
NTM	protein_coding	ENSG00000182667	ENST00000425719	1	0.125	4	167	/
TTC3	protein_coding	ENSG00000182670	ENST00000399017	2,4,7,9,12,14,18,20,21,22,23,24,26,27,28,32,33,35,36,38,39,40,41,42,43,44,45,46	0.608696	32	4983	/
RPS17	protein_coding	ENSG00000182774	ENST00000647841	1,2,3,4,5	1	7	492	Blackfan-Diamond anemia/DIAMOND-BLACKFAN ANEMIA 4
HCAR2	protein_coding	ENSG00000182782	ENST00000328880	1	1	1	833	/
OR2T29	protein_coding	ENSG00000182783	ENST00000641069	2	0.5	2	948	/
RRP7BP	transcribed_unprocessed_pseudogene	ENSG00000182841	/	/	/	0	0	/
SLC25A18	protein_coding	ENSG00000182902	/	/	/	0	0	/
SPATA13	protein_coding	ENSG00000182957	/	/	/	0	0	/
AC135068.1	protein_coding	ENSG00000182974	ENST00000332663	3	1	1	942	/
ZNF320	protein_coding	ENSG00000182986	ENST00000595635	7	0.125	1	127	/
RGPD6	protein_coding	ENSG00000183054	ENST00000329516	23	0.0434783	1	35	/
ARHGEF37	protein_coding	ENSG00000183111	/	/	/	0	0	/
CEP57L1	protein_coding	ENSG00000183137	ENST00000368970	5,9,10	0.272727	7	526	/
ANKRD20A2	protein_coding	ENSG00000183148	ENST00000377601	2.3	0.133333	3	341	/
CALN1	protein_coding	ENSG00000183166	/	/	/	0	0	/
POTEC	protein_coding	ENSG00000183206	ENST00000358970	11	0.0909091	1	96	/
PLGLB1	protein_coding	ENSG00000183281	ENST00000355705	2	0.25	1	136	/
DAZAP2	protein_coding	ENSG00000183283	ENST00000549555	2,3,4	0.75	13	688	/
MAGEA2B	protein_coding	ENSG00000183305	ENST00000331220	5	0.2	2	945	/
OR2T34	protein_coding	ENSG00000183310	ENST00000328782	1	1	1	957	/
BOLA2	protein_coding	ENSG00000183336	ENST00000330978	1,2,3	1	3	459	/
BCOR	protein_coding	ENSG00000183337	ENST00000378444	4.8	0.133333	4	445	Clear cell sarcoma of kidney/Microphthalmia Lenz type/Oculofaciocardiodental syndrome/MICROPHTHALMIA SYNDROMIC 1/MICROPHTHALMIA SYNDROMIC 2/MICROPHTHALMIA SYNDROMIC TYPE 2
SF3A3	protein_coding	ENSG00000183431	/	/	/	0	0	/
TRIM61	protein_coding	ENSG00000183439	ENST00000329314	3	0.2	2	1089	/
GTF2H2C	protein_coding	ENSG00000183474	ENST00000510979	3,4,5	0.1875	3	202	/
EP400	protein_coding	ENSG00000183495	ENST00000389562	1	0.0192308	1	833	/
PI4KAP2	transcribed_unitary_pseudogene	ENSG00000183506	/	/	/	0	0	/
ACSM5	protein_coding	ENSG00000183549	ENST00000331849	2,4,5,6,7,8,9,10,11,12,13,14	0.857143	14	1554	/
HIST2H2AA3	protein_coding	ENSG00000183558	/	/	/	1	393	/
SERHL2	protein_coding	ENSG00000183569	ENST00000327678	2,3,4,5,6,7	0.5	7	511	/
HMGN3P1	processed_pseudogene	ENSG00000183586	/	/	/	0	0	/
HIST2H3D	protein_coding	ENSG00000183598	ENST00000331491	1	1	1	411	/
GOLGA8G	protein_coding	ENSG00000183629	ENST00000525590	1	0.0526316	1	84	/
PTPN20B	protein_coding	ENSG00000183675	/	/	/	8	129	/
BMP8A	protein_coding	ENSG00000183682	ENST00000331593	2,3,4	0.428571	3	534	/
OR4N4	protein_coding	ENSG00000183706	ENST00000328795	1	1	1	593	/
OPCML	protein_coding	ENSG00000183715	ENST00000331898	1	0.142857	4	167	OVARIAN CANCER OVARIAN CANCER EPITHELIAL INCLUDED
TMEM50A	protein_coding	ENSG00000183726	/	/	/	0	0	/
ACSM2A	protein_coding	ENSG00000183747	ENST00000573854	2,3,4,5,9,11,12	0.5	9	1021	/
MRC1L1	protein_coding	ENSG00000183748	/	/	/	29	4185	/
TCEB3C	protein_coding	ENSG00000183791	ENST00000330682	1	1	1	1641	/
ZNF730	protein_coding	ENSG00000183850	/	/	/	0	0	/
TOB2	protein_coding	ENSG00000183864	ENST00000327492	2	0.5	1	657	/
AC138969.1	protein_coding	ENSG00000183889	/	/	/	0	0	/
HTR7P1	transcribed_processed_pseudogene	ENSG00000183935	/	/	/	0	0	/
PRKX	protein_coding	ENSG00000183943	ENST00000262848	1,3,4,8	0.444444	4	464	/
PTP4A2	protein_coding	ENSG00000184007	/	/	/	0	0	/
CTAG1B	protein_coding	ENSG00000184033	ENST00000328435	1,2,3	1	5	646	/
EIF3C	protein_coding	ENSG00000184110	ENST00000331666	2,3,4,5,6,7,8,9,10,11,12,13,14,15,16,17,18,19,20,21	0.952381	26	2742	/
GOLGA6L4	protein_coding	ENSG00000184206	ENST00000510439	2	0.111111	1	99	/
ACOT1	protein_coding	ENSG00000184227	ENST00000311148	3	0.333333	2	606	/
RPL23AP82	transcribed_unprocessed_pseudogene	ENSG00000184319	/	/	/	0	0	/
PABPC1L2B	protein_coding	ENSG00000184388	ENST00000373521	1	1	1	603	/
CEND1	protein_coding	ENSG00000184524	ENST00000330106	2	0.5	1	450	/
XPOT	protein_coding	ENSG00000184575	ENST00000332707	2,6,7,8,9,12,13,14,15,17,18,19	0.48	12	1998	/
FOXD4L4	protein_coding	ENSG00000184659	ENST00000377413	1	1	1	1115	/
NDUFA12	protein_coding	ENSG00000184752	/	/	/	0	0	Leigh syndrome with leukodystrophy/MITOCHONDRIAL COMPLEX I DEFICIENCY NUCLEAR TYPE 23
OR4C10P	unprocessed_pseudogene	ENSG00000184789	/	/	/	0	0	/
APOO	protein_coding	ENSG00000184831	/	/	/	0	0	/
BTBD6	protein_coding	ENSG00000184887	ENST00000392554	1,2,3,4	1	8	1368	/
RBM43	protein_coding	ENSG00000184898	ENST00000331426	2.4	0.5	2	734	/
DMRTC1B	protein_coding	ENSG00000184911	ENST00000334036	2,3,4,5,6,7	0.857143	7	579	/
NUTM2A	protein_coding	ENSG00000184923	ENST00000381707	1.7	0.285714	3	1168	Endometrial stromal sarcoma
AQP12A	protein_coding	ENSG00000184945	ENST00000429564	1,2,3,4	1	7	924	/
MUC6	protein_coding	ENSG00000184956	ENST00000421673	31	0.030303	1	1795	/
USP18	protein_coding	ENSG00000184979	ENST00000215794	4,8,9,10	0.363636	4	496	USP18 deficiency/PSEUDO-TORCH SYNDROME 2/Severe pseudo-TORCH syndrome
SLC22A10	protein_coding	ENSG00000184999	/	/	/	0	0	/
ROBO2	protein_coding	ENSG00000185008	ENST00000487694	2	0.037037	1	109	Familial vesicoureteral reflux/VESICOURETERAL REFLUX 2
BRF1	protein_coding	ENSG00000185024	/	/	/	0	0	cerebellar-facial-dental syndrome/CEREBELLOFACIODENTAL SYNDROME
ZNF733P	transcribed_unprocessed_pseudogene	ENSG00000185037	/	/	/	0	0	/
TBC1D3F	protein_coding	ENSG00000185128	/	/	/	1	95	/
HIST1H2BL	protein_coding	ENSG00000185130	/	/	/	0	0	/
LRRC37B	protein_coding	ENSG00000185158	ENST00000341671	8,9,10,11,12	0.416667	8	721	/
NOMO2	protein_coding	ENSG00000185164	/	/	/	7	921	/
AQP12B	protein_coding	ENSG00000185176	ENST00000407834	1,2,3	1	6	924	/
ZNF479	protein_coding	ENSG00000185177	ENST00000331162	5	0.2	1	1313	/
GOLGA8DP	transcribed_unprocessed_pseudogene	ENSG00000185182	/	/	/	0	0	/
IFITM2	protein_coding	ENSG00000185201	ENST00000616316	1.2	1	7	100	/
IL3RA	protein_coding	ENSG00000185291	ENST00000331035	2,3,4,5,6,7,8,9,10,11,12	0.916667	12	2274	/
SFTPA2	protein_coding	ENSG00000185303	ENST00000372325	3,4,5,6	0.666667	7	760	Idiopathic pulmonary fibrosis/PULMONARY FIBROSIS IDIOPATHIC
HS6ST3	protein_coding	ENSG00000185352	/	/	/	0	0	/
SP140L	protein_coding	ENSG00000185404	ENST00000415673	16,17,18	0.157895	3	331	/
MRPL30	protein_coding	ENSG00000185414	ENST00000338148	4.6	0.333333	3	289	/
METTL7A	protein_coding	ENSG00000185432	ENST00000548553	2	0.333333	2	473	/
FAM174B	protein_coding	ENSG00000185442	/	/	/	0	0	/
KRT6B	protein_coding	ENSG00000185479	ENST00000252252	1,2,3	0.333333	3	700	Pachyonychia congenita/PACHYONYCHIA CONGENITA 4
BRCC3	protein_coding	ENSG00000185515	ENST00000369462	4,6,9,11	0.333333	6	496	Moyamoya angiopathy-short stature-facial dysmorphism-hypergonadotropic hypogonadism syndrome
BRWD1	protein_coding	ENSG00000185658	/	/	/	0	0	/
EP400P1	transcribed_unprocessed_pseudogene	ENSG00000185684	/	/	/	0	0	/
ANKFY1	protein_coding	ENSG00000185722	/	/	/	0	0	Familial idiopathic steroid-resistant nephrotic syndrome with diffuse mesangial proliferation
IFIT1	protein_coding	ENSG00000185745	ENST00000371804	2	0.5	2	893	/
CLDN24	protein_coding	ENSG00000185758	ENST00000541814	1	1	1	179	/
KCNQ5	protein_coding	ENSG00000185760	/	/	/	0	0	Autosomal dominant non-syndromic intellectual disability/MENTAL RETARDATION AUTOSOMAL DOMINANT 46/Intellectual Disability with or without Epileptic Encephalopathy
MORF4L1	protein_coding	ENSG00000185787	/	/	/	0	0	/
NLRP9	protein_coding	ENSG00000185792	ENST00000332836	1,2,3,4,5,7,8,9	0.888889	8	2229	/
PIGP	protein_coding	ENSG00000185808	/	/	/	0	0	Early infantile epileptic encephalopathy/EPILEPTIC ENCEPHALOPATHY EARLY INFANTILE 55
ARL17A	protein_coding	ENSG00000185829	ENST00000336125	2.3	0.5	3	288	/
NPIPB4	protein_coding	ENSG00000185864	ENST00000415645	7	0.111111	2	736	/
FFAR3	protein_coding	ENSG00000185897	ENST00000327809	2	0.5	2	1041	/
SETD4	protein_coding	ENSG00000185917	/	/	/	0	0	/
OR4C46	protein_coding	ENSG00000185926	ENST00000328188	1	1	1	605	/
NKAIN3	protein_coding	ENSG00000185942	/	/	/	0	0	/
SHOX	protein_coding	ENSG00000185960	ENST00000381578	2,3,4,5,6	0.833333	6	1758	LANGER MESOMELIC DYSPLASIA/Leri-Weill dyschondrosteosis/Shox-related short stature/Short stature idiopathic X-linked
TMLHE	protein_coding	ENSG00000185973	ENST00000334398	7.8	0.25	3	407	AUTISM SUSCEPTIBILITY TO X-LINKED 6
SDHAP3	transcribed_unprocessed_pseudogene	ENSG00000185986	/	/	/	0	0	/
C15orf41	protein_coding	ENSG00000186073	/	/	/	0	0	Congenital dyserythropoietic anemia type I/ANEMIA CONGENITAL DYSERYTHROPOIETIC TYPE Ib
NBPF6	protein_coding	ENSG00000186086	ENST00000495380	5,7,9,10,11,12,13,14,15	0.6	11	1023	/
OR4F5	protein_coding	ENSG00000186092	/	/	/	1	9	/
ARGFX	protein_coding	ENSG00000186103	/	/	/	0	0	/
CYP4F2	protein_coding	ENSG00000186115	ENST00000221700	12.13	0.153846	3	170	Vitamin K antagonists toxicity or dose selection
WWOX	protein_coding	ENSG00000186153	/	/	/	0	0	46XY partial gonadal dysgenesis/Autosomal recessive cerebellar ataxia-epilepsy-intellectual disability syndrome due to WWOX deficiency/Squamous cell carcinoma of the esophagus/Undetermined early-onset epileptic encephalopathy/EPILEPTIC ENCEPHALOPATHY EARLY INFANTILE 28/ESOPHAGEAL CANCER ESOPHAGEAL SQUAMOUS CELL CARCINOMA SUSCEPTIBILITY TO INCLUDED/Spinocerebellar ataxia autosomal recessive 12
CYP4Z1	protein_coding	ENSG00000186160	ENST00000334194	3,5,6	0.25	3	325	/
CIDECP1	transcribed_unprocessed_pseudogene	ENSG00000186162	/	/	/	0	0	/
KIF18B	protein_coding	ENSG00000186185	ENST00000593135	13.14	0.125	2	46	/
MRTFB	protein_coding	ENSG00000186260	/	/	/	0	0	/
NBPF12	protein_coding	ENSG00000186275	/	/	/	2	175	/
GPAT2	protein_coding	ENSG00000186281	ENST00000434632	3,4,5,6,7,8,9,10,11,12,13,14,15,16,18,20,21	0.73913	18	1665	/
PABPC1L2A	protein_coding	ENSG00000186288	ENST00000373519	1	1	1	603	/
MST1P2	unprocessed_pseudogene	ENSG00000186301	/	/	/	0	0	/
CA5BP1	transcribed_unprocessed_pseudogene	ENSG00000186312	/	/	/	0	0	/
PRELID2	protein_coding	ENSG00000186314	/	/	/	0	0	/
BTN3A2	protein_coding	ENSG00000186470	ENST00000377708	3.4	0.181818	4	433	/
2010-09-01	protein_coding	ENSG00000186522	ENST00000356688	3,4,5,6,7,8,9,10,12	0.75	10	1388	/
CYP4F3	protein_coding	ENSG00000186529	ENST00000221307	12.13	0.153846	5	171	/
DEFB105A	protein_coding	ENSG00000186562	ENST00000334773	1,2,3	1	3	237	/
DEFB107A	protein_coding	ENSG00000186572	ENST00000335021	1.2	1	2	213	/
SMIM29	protein_coding	ENSG00000186577	/	/	/	0	0	/
DEFB106A	protein_coding	ENSG00000186579	ENST00000335186	1.2	1	2	198	/
UBE2H	protein_coding	ENSG00000186591	ENST00000355621	6.7	0.285714	4	254	/
DEFB105B	protein_coding	ENSG00000186599	ENST00000335510	1,2,3	1	3	237	/
KTN1-AS1	lncRNA	ENSG00000186615	/	/	/	0	0	/
EEF1GP1	processed_pseudogene	ENSG00000186676	/	/	/	0	0	/
DTX2P1	transcribed_unprocessed_pseudogene	ENSG00000186704	/	/	/	0	0	/
MST1L	transcribed_unprocessed_pseudogene	ENSG00000186715	/	/	/	0	0	/
BCR	protein_coding	ENSG00000186716	/	/	/	0	0	Chronic myeloid leukemia/Distal 22q11,2 microdeletion syndrome/Precursor B-cell acute lymphoblastic leukemia/Precursor T-cell acute lymphoblastic leukemia/LEUKEMIA ACUTE LYMPHOBLASTIC/LEUKEMIA CHRONIC MYELOID
AC114267.1	protein_coding	ENSG00000186723	ENST00000641419	4	0.25	2	957	/
SPIN2B	protein_coding	ENSG00000186787	ENST00000333933	2	0.5	4	777	/
SPATA31D3	protein_coding	ENSG00000186788	ENST00000445385	1,2,3,4	1	4	2570	/
IFNA10	protein_coding	ENSG00000186803	ENST00000357374	1	1	1	570	/
ANXA8L2	protein_coding	ENSG00000186807	/	/	/	1	59	/
ERCC6L	protein_coding	ENSG00000186871	/	/	/	0	0	/
ZACN	protein_coding	ENSG00000186919	ENST00000334586	6.8	0.222222	2	172	/
RHD	protein_coding	ENSG00000187010	ENST00000342055	6.9	0.222222	8	328	Rh deficiency syndrome
ESPN	protein_coding	ENSG00000187017	ENST00000645284	2,3,4,5,6,7,8,9,10,11,12	0.846154	16	3888	Autosomal recessive non-syndromic sensorineural deafness type DFNB/DEAFNESS AUTOSOMAL RECESSIVE 36 WITH OR WITHOUT VESTIBULAR INVOLVEMENT
CYP4A11	protein_coding	ENSG00000187048	ENST00000310638	5,6,7,8,9	0.416667	9	767	/
DEFB106B	protein_coding	ENSG00000187082	ENST00000335479	1.2	1	2	198	/
HEATR4	protein_coding	ENSG00000187105	/	/	/	0	0	/
NAP1L1	protein_coding	ENSG00000187109	/	/	/	0	0	/
AKR1C1	protein_coding	ENSG00000187134	ENST00000380872	1,4,5,8,9	0.555556	6	501	/
BAGE2	transcribed_unprocessed_pseudogene	ENSG00000187172	/	/	/	0	0	/
DAZ3	protein_coding	ENSG00000187191	ENST00000382365	2.3	0.105263	2	239	Partial chromosome Y deletion
MT1X	protein_coding	ENSG00000187193	ENST00000394485	1.3	0.666667	2	120	/
FNBP1	protein_coding	ENSG00000187239	/	/	/	0	0	/
MAGED4B	protein_coding	ENSG00000187243	ENST00000485287	2,3,4,5,6,7,8,9,10,11,12,13,14	0.928571	16	2278	/
NPSR1	protein_coding	ENSG00000187258	/	/	/	0	0	ASTHMA-RELATED TRAITS SUSCEPTIBILITY TO 2
KRTAP9-8	protein_coding	ENSG00000187272	ENST00000254072	1	1	1	480	/
CIDEC	protein_coding	ENSG00000187288	ENST00000383817	5.6	0.333333	5	383	CIDEC-related familial partial lipodystrophy/LIPODYSTROPHY FAMILIAL PARTIAL TYPE 5
TAF9B	protein_coding	ENSG00000187325	/	/	/	0	0	/
PCDHB13	protein_coding	ENSG00000187372	ENST00000341948	1	1	1	1155	/
FOXD4L3	protein_coding	ENSG00000187559	ENST00000342833	1	1	1	1088	/
ZNF286A	protein_coding	ENSG00000187607	ENST00000464847	1.5	0.4	13	1293	/
RGPD1	protein_coding	ENSG00000187627	/	/	/	1	48	/
DHRS4L2	protein_coding	ENSG00000187630	ENST00000335125	4,5,6	0.375	7	372	/
SAMD11	protein_coding	ENSG00000187634	ENST00000342066	9,12,13,14	0.285714	7	581	/
OR2T27	protein_coding	ENSG00000187701	/	/	/	1	954	/
AMY1C	protein_coding	ENSG00000187733	ENST00000370079	3,4,6,7	0.4	4	652	/
SCXB	protein_coding	ENSG00000187786	/	/	/	2	606	/
RNFT1P3	unprocessed_pseudogene	ENSG00000187870	/	/	/	0	0	/
LRRC74B	protein_coding	ENSG00000187905	/	/	/	0	0	/
DMBT1	protein_coding	ENSG00000187908	ENST00000368909	11,12,13,14,21,22,23,24,29,30,32,33,35,36	0.264151	16	2250	/
CLEC17A	protein_coding	ENSG00000187912	ENST00000417570	1,2,3,4	0.285714	5	277	/
AC091057.1	lncRNA	ENSG00000187951	/	/	/	0	0	/
HS6ST1P1	processed_pseudogene	ENSG00000187952	/	/	/	0	0	/
PMS2CL	transcribed_unprocessed_pseudogene	ENSG00000187953	/	/	/	0	0	/
KLHL17	protein_coding	ENSG00000187961	/	/	/	0	0	/
AC026412.1	transcribed_unprocessed_pseudogene	ENSG00000188002	/	/	/	0	0	/
RAB42	protein_coding	ENSG00000188060	ENST00000465518	1.2	1	3	657	/
GPR89B	protein_coding	ENSG00000188092	ENST00000314163	3,4,5,9,14	0.357143	5	458	/
ALOX15P2	unprocessed_pseudogene	ENSG00000188101	/	/	/	0	0	/
EYS	protein_coding	ENSG00000188107	/	/	/	0	0	Retinitis pigmentosa/RETINITIS PIGMENTOSA 25
DAZ1	protein_coding	ENSG00000188120	ENST00000405239	2,3,4,5,7,8,9,10,12,13,14,15,16	0.464286	13	1124	Partial chromosome Y deletion/SPERMATOGENIC FAILURE Y-LINKED 2
NUTM2G	protein_coding	ENSG00000188152	ENST00000372322	1,2,6,7	0.571429	6	1655	/
KRTAP10-6	protein_coding	ENSG00000188155	ENST00000400368	2	1	1	770	/
NUTM2B	protein_coding	ENSG00000188199	ENST00000429828	5,6,7	0.428571	4	1101	Clear cell sarcoma of kidney/Endometrial stromal sarcoma
POTEE	protein_coding	ENSG00000188219	ENST00000356920	10	0.0666667	1	34	/
FAM230A	protein_coding	ENSG00000188280	/	/	/	0	0	/
RUFY4	protein_coding	ENSG00000188282	/	/	/	0	0	/
CENPP	protein_coding	ENSG00000188312	/	/	/	0	0	/
GTF2F2	protein_coding	ENSG00000188342	/	/	/	0	0	/
ZP3	protein_coding	ENSG00000188372	ENST00000394857	5,6,7,8	0.5	6	562	Female infertility due to zona pellucida defect/OOCYTE MATURATION DEFECT 3
GPAT2P2	unprocessed_pseudogene	ENSG00000188383	/	/	/	0	0	/
ANKRD36P1	unprocessed_pseudogene	ENSG00000188399	/	/	/	0	0	/
SRP72P2	processed_pseudogene	ENSG00000188451	/	/	/	0	0	/
SRSF10	protein_coding	ENSG00000188529	ENST00000492112	1,2,3,6	0.666667	16	534	/
HBA2	protein_coding	ENSG00000188536	ENST00000251595	1,2,3	1	4	429	Alpha-thalassemia - intellectual disability syndrome linked to chromosome 16/Hb Bart's Hydrops Fetalis/HEMOGLOBIN H DISEASE/Hemoglobin M disease/ALPHA-THALASSEMIA/ERYTHROCYTOSIS FAMILIAL 7/HEINZ BODY ANEMIAS
RALGAPA2	protein_coding	ENSG00000188559	/	/	/	0	0	/
ASAH2	protein_coding	ENSG00000188611	ENST00000395526	6,7,8,9,10,11,12,13,14,15,16,17,18,20	0.636364	15	1443	/
SUMO2	protein_coding	ENSG00000188612	/	/	/	0	0	/
SAXO2	protein_coding	ENSG00000188659	ENST00000339465	1	0.333333	4	47	/
RHCE	protein_coding	ENSG00000188672	ENST00000294413	6,8,10	0.3	6	245	Rh deficiency syndrome/RH-NULL AMORPH TYPE
TEKT4P2	transcribed_unprocessed_pseudogene	ENSG00000188681	/	/	/	0	0	/
SCXA	protein_coding	ENSG00000188686	/	/	/	2	606	/
ZNF322P1	processed_pseudogene	ENSG00000188801	/	/	/	0	0	/
ZDHHC11	protein_coding	ENSG00000188818	ENST00000283441	2,3,5,6,7	0.384615	13	1354	/
CNR2	protein_coding	ENSG00000188822	/	/	/	0	0	/
NOC2L	protein_coding	ENSG00000188976	/	/	/	0	0	/
DHFRP1	processed_pseudogene	ENSG00000188985	/	/	/	0	0	/
KIR2DL4	protein_coding	ENSG00000189013	ENST00000345540	1,2,3,4,5,7	0.857143	13	1093	/
NDUFA4	protein_coding	ENSG00000189043	ENST00000339600	4	0.25	1	57	Leigh syndrome with leukodystrophy
RNFT1	protein_coding	ENSG00000189050	ENST00000305783	3,4,7,8	0.444444	4	66	/
RIMKLBP1	processed_pseudogene	ENSG00000189089	/	/	/	0	0	/
FAM25B	protein_coding	ENSG00000189090	ENST00000452267	1,2,3	1	3	270	/
IL1RAPL2	protein_coding	ENSG00000189108	/	/	/	0	0	/
PLAC9	protein_coding	ENSG00000189129	ENST00000372263	1,2,3,4	1	8	385	/
GRAPL	protein_coding	ENSG00000189152	ENST00000344415	1,2,3,4	1	6	361	/
BTBD8	protein_coding	ENSG00000189195	/	/	/	0	0	/
TRIM64B	protein_coding	ENSG00000189253	ENST00000329862	1,4,5,6	0.666667	4	941	/
PNRC2	protein_coding	ENSG00000189266	ENST00000647887	4	0.25	5	591	/
ANKRD62P1-PARP4P3	lncRNA	ENSG00000189295	/	/	/	0	0	/
SLC35E2B	protein_coding	ENSG00000189339	ENST00000617444	3,4,5,9	0.4	6	741	/
SPATA31D4	protein_coding	ENSG00000189357	ENST00000419782	1,2,3,4	1	4	2570	/
TBC1D28	protein_coding	ENSG00000189375	ENST00000345096	3,4,5,7,8	0.555556	5	416	/
HMGB1	protein_coding	ENSG00000189403	/	/	/	0	0	/
MMP23B	protein_coding	ENSG00000189409	ENST00000356026	1,2,3,4,5,6,7,8	1	14	1240	/
USP32P3	transcribed_unprocessed_pseudogene	ENSG00000189423	/	/	/	0	0	/
BLOC1S2	protein_coding	ENSG00000196072	ENST00000370372	3,4,5	0.6	5	244	/
KIAA0895L	protein_coding	ENSG00000196123	ENST00000290881	3,4,5,6,7,8	0.75	8	1416	/
HLA-DRB1	protein_coding	ENSG00000196126	ENST00000360004	1,2,3	0.5	3	562	Bullous pemphigoid/Diffuse cutaneous systemic sclerosis/Follicular lymphoma/Limbic encephalitis with LGI1 antibodies/Limited cutaneous systemic sclerosis/Limited systemic sclerosis/Narcolepsy type 1/Narcolepsy type 2/Pediatric multiple sclerosis/Sarcoidosis/Systemic lupus erythematosus/Systemic-onset juvenile idiopathic arthritis/MULTIPLE SCLEROSIS SUSCEPTIBILITY TO/SARCOIDOSIS SUSCEPTIBILITY TO 1
AKR1C3	protein_coding	ENSG00000196139	ENST00000380554	7	0.111111	1	166	/
RNF216P1	transcribed_unprocessed_pseudogene	ENSG00000196204	/	/	/	0	0	/
OR2T2	protein_coding	ENSG00000196240	ENST00000641925	4	0.25	2	975	/
GTF2IRD2	protein_coding	ENSG00000196275	ENST00000451013	4	0.0625	19	3007	/
MFSD14C	protein_coding	ENSG00000196312	ENST00000602917	3.4	0.4	2	191	/
POM121	protein_coding	ENSG00000196313	ENST00000395270	12,13,14,16	0.25	5	527	/
ZBTB44	protein_coding	ENSG00000196323	ENST00000357899	6	0.125	2	181	/
GIMAP5	protein_coding	ENSG00000196329	/	/	/	0	0	/
STK31	protein_coding	ENSG00000196335	/	/	/	0	0	/
ZKSCAN7	protein_coding	ENSG00000196345	ENST00000273320	4.5	0.333333	2	140	/
NUDT11	protein_coding	ENSG00000196368	ENST00000375992	1.2	1	2	1000	/
ZNF140	protein_coding	ENSG00000196387	ENST00000355557	2,3,4,5	0.8	8	1265	/
SPANXD	protein_coding	ENSG00000196406	ENST00000370515	1	0.5	1	72	/
ZNF765	protein_coding	ENSG00000196417	/	/	/	1	41	/
ZNF124	protein_coding	ENSG00000196418	ENST00000543802	1	0.25	5	34	/
XRCC6	protein_coding	ENSG00000196419	/	/	/	0	0	/
PPP1R26	protein_coding	ENSG00000196422	/	/	/	0	0	/
NBPF4	protein_coding	ENSG00000196427	ENST00000415641	5,7,9,10,11,12,13,14,15	0.6	11	1026	/
ASMT	protein_coding	ENSG00000196433	ENST00000381241	1,2,3,4,5,6,7,8,9	1	12	2244	/
NPIPB15	protein_coding	ENSG00000196436	ENST00000429990	7	0.142857	1	585	/
YRDC	protein_coding	ENSG00000196449	/	/	/	0	0	/
ZNF605	protein_coding	ENSG00000196458	ENST00000392321	2,3,4,5	0.8	5	2019	/
TRAPPC2	protein_coding	ENSG00000196459	/	/	/	0	0	SPONDYLOEPIPHYSEAL DYSPLASIA TARDA/SPONDYLOEPIPHYSEAL DYSPLASIA TARDA X-LINKED
MYL6B	protein_coding	ENSG00000196465	ENST00000553066	2,4,5	0.428571	5	375	/
ZNF799	protein_coding	ENSG00000196466	ENST00000430385	2,3,4	0.75	6	1512	/
SIAH1	protein_coding	ENSG00000196470	ENST00000356721	2	0.5	3	251	/
NACA	protein_coding	ENSG00000196531	/	/	/	0	0	/
OR2T3	protein_coding	ENSG00000196539	ENST00000359594	1	1	1	957	/
HBG2	protein_coding	ENSG00000196565	ENST00000336906	1,2,3	1	7	444	Hemoglobinopathy Toms River/Hereditary persistence of fetal hemoglobin-beta-thalassemia syndrome/Hereditary persistence of fetal hemoglobin-sickle cell disease syndrome/CYANOSIS TRANSIENT NEONATAL/FETAL HEMOGLOBIN QUANTITATIVE TRAIT LOCUS 1
LAMA2	protein_coding	ENSG00000196569	/	/	/	0	0	Congenital muscular dystrophy type 1A/MUSCULAR DYSTROPHY CONGENITAL MEROSIN-DEFICIENT 1A/MUSCULAR DYSTROPHY LIMB-GIRDLE AUTOSOMAL RECESSIVE 23/Congenital Muscular Dystrophy
MBD3L2B	protein_coding	ENSG00000196589	ENST00000636986	1	0.5	2	45	/
POTEF	protein_coding	ENSG00000196604	ENST00000409914	12	0.0588235	1	36	/
UGT2B15	protein_coding	ENSG00000196620	ENST00000338206	2,3,5	0.5	3	463	/
TCF4	protein_coding	ENSG00000196628	/	/	/	0	0	Autosomal dominant non-syndromic intellectual disability/Fuchs endothelial corneal dystrophy/PITT-HOPKINS SYNDROME/Primary sclerosing cholangitis/CORNEAL DYSTROPHY FUCHS ENDOTHELIAL 3
RABL6	protein_coding	ENSG00000196642	/	/	/	0	0	Autosomal Recessive Mental Retardation
GPR89C	protein_coding	ENSG00000196644	/	/	/	1	89	/
TTC30B	protein_coding	ENSG00000196659	ENST00000408939	1	1	1	1596	/
AC009022.1	lncRNA	ENSG00000196696	/	/	/	0	0	/
AMZ2	protein_coding	ENSG00000196704	ENST00000577985	1,5,6	0.5	11	272	/
VKORC1L1	protein_coding	ENSG00000196715	/	/	/	1	110	/
GM2A	protein_coding	ENSG00000196743	/	/	/	0	0	GM2-GANGLIOSIDOSIS AB VARIANT/GM2-GANGLIOSIDOSIS TYPE AB
HIST1H2AI	protein_coding	ENSG00000196747	ENST00000358739	1	1	1	245	/
ANKRD20A1	protein_coding	ENSG00000196774	/	/	/	2	289	/
TLE1	protein_coding	ENSG00000196781	ENST00000376499	1,2,7	0.15	4	356	/
NPIPB10P	unprocessed_pseudogene	ENSG00000196796	/	/	/	0	0	/
POTEI	protein_coding	ENSG00000196834	ENST00000451531	8,10,13	0.2	5	280	/
CBWD3	protein_coding	ENSG00000196873	ENST00000360171	3.8	0.133333	3	188	/
ANKRD36B	protein_coding	ENSG00000196912	ENST00000258459	1,7,8,9,10,11,12,25,26,27,28,33,34,35,36,37,39,40	0.409091	21	1908	/
SCOC-AS1	lncRNA	ENSG00000196951	/	/	/	0	0	/
ZNF585A	protein_coding	ENSG00000196967	ENST00000292841	5	0.2	3	1378	/
LAGE3	protein_coding	ENSG00000196976	ENST00000357360	2.3	0.666667	2	244	GALLOWAY-MOWAT SYNDROME/GALLOWAY-MOWAT SYNDROME 2 X-LINKED
FAM163B	protein_coding	ENSG00000196990	ENST00000356873	1.2	1	3	501	/
NPIPB9	protein_coding	ENSG00000196993	ENST00000550983	8	0.125	1	603	/
WDR45	protein_coding	ENSG00000196998	ENST00000356463	5,6,7,9,10,11,12	0.583333	17	876	Beta-propeller protein-associated neurodegeneration/Neurodegeneration with brain iron accumulation 5/Neurodegeneration with brain iron accumulation
ZNF100	protein_coding	ENSG00000197020	ENST00000358296	3	0.2	2	127	/
CXorf40B	protein_coding	ENSG00000197021	ENST00000370406	4.5	0.4	6	486	/
GMFB	protein_coding	ENSG00000197045	ENST00000358056	2.7	0.285714	3	169	/
KIAA1671	protein_coding	ENSG00000197077	ENST00000358431	1,2,3,4	0.363636	5	4530	/
ZNF300P1	transcribed_unprocessed_pseudogene	ENSG00000197083	/	/	/	0	0	/
NPSR1-AS1	lncRNA	ENSG00000197085	/	/	/	0	0	/
IFNL3	protein_coding	ENSG00000197110	ENST00000613087	3,4,5	0.5	3	312	Response to antiviral treatment in hepatitis C/HEPATITIS C VIRUS SUSCEPTIBILITY TO
PSMD12	protein_coding	ENSG00000197170	ENST00000356126	1,3,4,5,6,7,8,9,11	0.818182	11	1141	17q24,2 microdeletion syndrome/STANKIEWICZ-ISIDOR SYNDROME/Global Developmental Delay Multiple Malformations
MAGEA6	protein_coding	ENSG00000197172	/	/	/	1	785	/
AP000550.1	lncRNA	ENSG00000197210	/	/	/	0	0	/
HIST1H4J	protein_coding	ENSG00000197238	ENST00000355057	1	1	1	312	Intellectual disability with facial dysmorphism
TPSB2	protein_coding	ENSG00000197253	ENST00000606293	2,3,5,6,7	0.833333	7	850	/
CCL4L2	protein_coding	ENSG00000197262	/	/	/	10	420	/
ZNF720	protein_coding	ENSG00000197302	ENST00000316491	4	0.2	2	521	/
AC060834.1	processed_pseudogene	ENSG00000197320	/	/	/	0	0	/
ZNF98	protein_coding	ENSG00000197360	ENST00000357774	2.4	0.5	2	1520	/
CYP2B6	protein_coding	ENSG00000197408	ENST00000324071	5	0.111111	1	177	Efavirenz toxicity/EFAVIRENZ POOR METABOLISM OF EFAVIRENZ CENTRAL NERVOUS SYSTEM TOXICITY SUSCEPTIBILITY TO INCLUDED
GOLGA6L1	protein_coding	ENSG00000197414	/	/	/	2	201	/
GGT3P	transcribed_unprocessed_pseudogene	ENSG00000197421	/	/	/	0	0	/
CYP2F1	protein_coding	ENSG00000197446	ENST00000331105	8.9	0.2	2	183	/
HNRNPAB	protein_coding	ENSG00000197451	ENST00000504898	2,3,4,5,7	0.714286	11	649	/
STMN3	protein_coding	ENSG00000197457	/	/	/	0	0	/
TTC30A	protein_coding	ENSG00000197557	ENST00000355689	1	1	1	1594	/
PIGN	protein_coding	ENSG00000197563	/	/	/	0	0	Fryns syndrome/MULTIPLE CONGENITAL ANOMALIES-HYPOTONIA-SEIZURES SYNDROME/MULTIPLE CONGENITAL ANOMALIES-HYPOTONIA-SEIZURES SYNDROME 1
FAR1	protein_coding	ENSG00000197601	ENST00000354817	5,7,9,10,11,12	0.5	7	890	Severe intellectual disability-epilepsy-cataract syndrome due to fatty acyl-CoA reductase 1 deficiency/Peroxisomal fatty acyl-coa reductase 1 disorder/Severe intellectual disability epilepsy and cataracts
CPLANE1	protein_coding	ENSG00000197603	/	/	/	0	0	Joubert Syndrome/Monomelic amyotrophy/Orofaciodigital syndrome type 6/JOUBERT SYNDROME 17/OROFACIODIGITAL SYNDROME VI
MYH6	protein_coding	ENSG00000197616	ENST00000405093	26	0.025641	1	349	Atrial septal defect ostium secundum type/Familial isolated dilated cardiomyopathy/Familial sick sinus syndrome/ATRIAL SEPTAL DEFECT 3/CARDIOMYOPATHY DILATED 1EE/CARDIOMYOPATHY FAMILIAL HYPERTROPHIC 1/CARDIOMYOPATHY FAMILIAL HYPERTROPHIC 14/SICK SINUS SYNDROME 3 SUSCEPTIBILITY TO/ATRIAL SEPTAL DEFECT TYPE 3/CARDIOMYOPATHY DILATED TYPE 1EE/CARDIOMYOPATHY FAMILIAL HYPERTROPHIC TYPE 14
CXorf40A	protein_coding	ENSG00000197620	ENST00000441248	5.6	0.5	11	486	/
AC007952.1	lncRNA	ENSG00000197665	/	/	/	0	0	/
TBC1D3	protein_coding	ENSG00000197681	/	/	/	1	95	/
CBX3P7	processed_pseudogene	ENSG00000197692	/	/	/	0	0	/
CR1L	protein_coding	ENSG00000197721	ENST00000508064	1	0.0833333	1	97	/
PHF2	protein_coding	ENSG00000197724	ENST00000359246	2,4,5,6,7,8,9,10,11,12,13,14,15,16,17,18	0.727273	19	2378	/
TAF13	protein_coding	ENSG00000197780	/	/	/	0	0	Autosomal recessive primary microcephaly/MENTAL RETARDATION AUTOSOMAL RECESSIVE 60/Autosomal-Recessive Intellectual Disability and Microcephaly
ATAD3A	protein_coding	ENSG00000197785	ENST00000378755	3,4,5,10,11,13,15	0.4375	8	807	Optic atrophy-peripheral neuropathy-developmental delay syndrome/HAREL-YOON SYNDROME/ATAD3A disorder - global developmental delay hypotonia optic atrophy axonal neuropathy and hypertrophic cardiomyopathy
OCLN	protein_coding	ENSG00000197822	ENST00000355237	5,6,7,8,9	0.555556	6	678	Congenital intrauterine infection-like syndrome/PSEUDO-TORCH SYNDROME 1
ZNF181	protein_coding	ENSG00000197841	ENST00000492450	4	0.25	3	1020	/
INKA2	protein_coding	ENSG00000197852	/	/	/	0	0	/
[truncated: 2,473 more rows]
