# Supplementary material for: Systematic analysis of paralogous regions in 41,755 exomes uncovers clinically relevant variation
Source: Research Square preprint supplement (doi:10.21203/rs.3.rs-2302399/v1), 2022-11-29
Supplement: Supplementary file 11 [file STable19.xlsx]

## Sheet: STable19
Chrom_CELA3A	Pos_CELA3A	Base_CELA3A	Chrom_CELA3B	Pos_CELA3B	Base_CELA3B
chr1	22338346	-	chr1	22315158	g
chr1	22338346	-	chr1	22315159	c
chr1	22338346	-	chr1	22315160	a
chr1	22338346	-	chr1	22315161	g
chr1	22338346	-	chr1	22315162	a
chr1	22338346	-	chr1	22315163	t
chr1	22338346	-	chr1	22315164	c
chr1	22338346	-	chr1	22315165	a
chr1	22338346	-	chr1	22315166	c
chr1	22338346	-	chr1	22315167	a
chr1	22338346	-	chr1	22315168	a
chr1	22338346	-	chr1	22315169	g
chr1	22338346	-	chr1	22315170	g
chr1	22338346	-	chr1	22315171	t
chr1	22338346	-	chr1	22315172	c
chr1	22338346	-	chr1	22315173	a
chr1	22338346	-	chr1	22315174	g
chr1	22338346	-	chr1	22315175	g
chr1	22338346	-	chr1	22315176	a
chr1	22338346	-	chr1	22315177	g
chr1	22338346	-	chr1	22315178	a
chr1	22338346	-	chr1	22315179	t
chr1	22338346	-	chr1	22315180	t
chr1	22338346	-	chr1	22315181	g
chr1	22338346	-	chr1	22315182	a
chr1	22338346	-	chr1	22315183	g
chr1	22338347	a	chr1	22315184	a
chr1	22338348	c	chr1	22315185	c
chr1	22338349	c	chr1	22315186	c
chr1	22338350	a	chr1	22315187	a
chr1	22338351	t	chr1	22315188	t
chr1	22338352	c	chr1	22315189	c
chr1	22338353	c	chr1	22315190	c
chr1	22338354	t	chr1	22315191	t
chr1	22338355	g	chr1	22315192	g
chr1	22338356	g	chr1	22315193	g
chr1	22338357	c	chr1	22315194	c
chr1	22338358	t	chr1	22315195	t
chr1	22338359	a	chr1	22315196	a
chr1	22338360	a	chr1	22315197	a
chr1	22338361	c	chr1	22315198	c
chr1	22338362	a	chr1	22315199	a
chr1	22338363	c	chr1	22315200	a
chr1	22338364	g	chr1	22315201	g
chr1	22338365	g	chr1	22315202	g
chr1	22338366	t	chr1	22315203	t
chr1	22338367	g	chr1	22315204	g
chr1	22338368	a	chr1	22315205	a
chr1	22338369	a	chr1	22315206	a
chr1	22338370	a	chr1	22315207	a
chr1	22338371	t	chr1	22315208	c
chr1	22338372	c	chr1	22315209	c
chr1	22338373	c	chr1	22315210	c
chr1	22338374	c	chr1	22315211	t
chr1	22338375	a	chr1	22315212	g
chr1	22338376	t	chr1	22315213	t
chr1	22338377	c	chr1	22315214	c
chr1	22338378	t	chr1	22315215	t
chr1	22338379	g	chr1	22315216	c
chr1	22338380	t	chr1	22315217	t
chr1	22338381	a	chr1	22315218	a
chr1	22338382	c	chr1	22315219	c
chr1	22338383	t	chr1	22315220	t
chr1	22338384	a	chr1	22315221	a
chr1	22338385	a	chr1	22315222	a
chr1	22338386	a	chr1	22315223	a
chr1	22338387	a	chr1	22315224	a
chr1	22338388	a	chr1	22315225	a
chr1	22338389	t	chr1	22315226	t
chr1	22338390	a	chr1	22315227	a
chr1	22338391	c	chr1	22315228	c
chr1	22338392	a	chr1	22315229	a
chr1	22338393	a	chr1	22315230	a
chr1	22338394	a	chr1	22315231	a
chr1	22338395	a	chr1	22315232	a
chr1	22338396	a	chr1	22315233	a
chr1	22338397	t	chr1	22315234	t
chr1	22338398	t	chr1	22315235	t
chr1	22338399	a	chr1	22315236	a
chr1	22338400	g	chr1	22315237	g
chr1	22338401	c	chr1	22315238	c
chr1	22338402	c	chr1	22315239	c
chr1	22338403	a	chr1	22315240	a
chr1	22338404	g	chr1	22315241	g
chr1	22338405	g	chr1	22315242	g
chr1	22338406	c	chr1	22315243	c
chr1	22338407	a	chr1	22315244	a
chr1	22338408	t	chr1	22315245	t
chr1	22338409	g	chr1	22315246	g
chr1	22338410	g	chr1	22315247	g
chr1	22338411	t	chr1	22315248	t
chr1	22338412	g	chr1	22315249	g
chr1	22338413	g	chr1	22315250	g
chr1	22338414	c	chr1	22315251	c
chr1	22338415	g	chr1	22315252	g
chr1	22338416	t	chr1	22315253	t
chr1	22338417	a	chr1	22315254	a
chr1	22338418	c	chr1	22315255	c
chr1	22338419	g	chr1	22315256	g
chr1	22338420	c	chr1	22315257	c
chr1	22338421	c	chr1	22315258	c
chr1	22338422	t	chr1	22315259	t
chr1	22338423	g	chr1	22315260	g
chr1	22338424	t	chr1	22315261	t
chr1	22338425	a	chr1	22315262	a
chr1	22338426	g	chr1	22315263	g
chr1	22338427	t	chr1	22315264	t
chr1	22338428	c	chr1	22315265	c
chr1	22338429	c	chr1	22315266	c
chr1	22338430	c	chr1	22315267	c
chr1	22338431	a	chr1	22315268	a
chr1	22338432	g	chr1	22315269	g
chr1	22338433	c	chr1	22315270	c
chr1	22338434	t	chr1	22315271	t
chr1	22338435	a	chr1	22315272	a
chr1	22338436	c	chr1	22315273	c
chr1	22338437	t	chr1	22315274	t
chr1	22338438	t	chr1	22315275	t
chr1	22338439	g	chr1	22315276	g
chr1	22338440	g	chr1	22315277	g
chr1	22338441	g	chr1	22315278	g
chr1	22338442	a	chr1	22315279	a
chr1	22338443	g	chr1	22315280	g
chr1	22338444	g	chr1	22315281	g
chr1	22338445	c	chr1	22315282	c
chr1	22338446	t	chr1	22315283	t
chr1	22338447	g	chr1	22315284	g
chr1	22338448	a	chr1	22315285	a
chr1	22338449	g	chr1	22315286	g
chr1	22338450	g	chr1	22315287	g
chr1	22338451	a	chr1	22315288	c
chr1	22338452	a	chr1	22315289	a
chr1	22338453	g	chr1	22315290	g
chr1	22338454	g	chr1	22315291	g
chr1	22338455	a	chr1	22315292	a
chr1	22338456	g	chr1	22315293	g
chr1	22338457	a	chr1	22315294	a
chr1	22338458	a	chr1	22315295	a
chr1	22338459	t	chr1	22315296	t
chr1	22338460	g	chr1	22315297	g
chr1	22338461	g	chr1	22315298	g
chr1	22338462	c	chr1	22315299	c
chr1	22338463	a	chr1	22315300	a
chr1	22338464	t	chr1	22315301	t
chr1	22338465	g	chr1	22315302	g
chr1	22338466	a	chr1	22315303	a
chr1	22338467	a	chr1	22315304	a
chr1	22338468	c	chr1	22315305	c
chr1	22338469	c	chr1	22315306	c
chr1	22338470	c	chr1	22315307	c
chr1	22338471	a	chr1	22315308	a
chr1	22338472	a	chr1	22315309	a
chr1	22338473	g	chr1	22315310	g
chr1	22338474	a	chr1	22315311	a
chr1	22338475	a	chr1	22315312	g
chr1	22338476	g	chr1	22315313	g
chr1	22338477	t	chr1	22315314	t
chr1	22338478	g	chr1	22315315	g
chr1	22338479	g	chr1	22315316	g
chr1	22338480	a	chr1	22315317	a
chr1	22338481	g	chr1	22315318	g
chr1	22338482	g	chr1	22315319	g
chr1	22338483	t	chr1	22315320	t
chr1	22338484	t	chr1	22315321	t
chr1	22338485	g	chr1	22315322	g
chr1	22338486	c	chr1	22315323	c
chr1	22338487	a	chr1	22315324	g
chr1	22338488	g	chr1	22315325	g
chr1	22338489	t	chr1	22315326	t
chr1	22338490	g	chr1	22315327	g
chr1	22338491	a	chr1	22315328	a
chr1	22338492	g	chr1	22315329	g
chr1	22338493	t	chr1	22315330	c
chr1	22338494	t	chr1	22315331	t
chr1	22338495	g	chr1	22315332	g
chr1	22338496	a	chr1	22315333	a
chr1	22338497	g	chr1	22315334	g
chr1	22338498	a	chr1	22315335	a
chr1	22338499	t	chr1	22315336	t
chr1	22338500	c	chr1	22315337	t
chr1	22338501	g	chr1	22315338	g
chr1	22338501	-	chr1	22315339	t
chr1	22338501	-	chr1	22315340	g
chr1	22338501	-	chr1	22315341	c
chr1	22338501	-	chr1	22315342	c
chr1	22338501	-	chr1	22315343	a
chr1	22338501	-	chr1	22315344	c
chr1	22338502	t	chr1	22315345	t
chr1	22338503	g	chr1	22315346	g
chr1	22338504	c	chr1	22315347	c
chr1	22338505	a	chr1	22315348	a
chr1	22338506	c	chr1	22315349	c
chr1	22338507	t	chr1	22315350	t
chr1	22338508	c	chr1	22315351	c
chr1	22338509	c	chr1	22315352	c
chr1	22338510	a	chr1	22315353	a
chr1	22338511	g	chr1	22315354	g
chr1	22338512	c	chr1	22315355	c
chr1	22338513	c	chr1	22315356	c
chr1	22338514	t	chr1	22315357	t
chr1	22338515	g	chr1	22315358	g
chr1	22338516	g	chr1	22315359	g
chr1	22338517	g	chr1	22315360	g
chr1	22338518	c	chr1	22315361	c
chr1	22338519	a	chr1	22315362	a
chr1	22338520	a	chr1	22315363	a
chr1	22338521	c	chr1	22315364	c
chr1	22338522	a	chr1	22315365	a
chr1	22338523	g	chr1	22315366	g
chr1	22338524	a	chr1	22315367	a
chr1	22338525	g	chr1	22315368	g
chr1	22338526	t	chr1	22315369	t
chr1	22338527	g	chr1	22315370	g
chr1	22338528	a	chr1	22315371	a
chr1	22338529	g	chr1	22315372	g
chr1	22338530	a	chr1	22315373	a
chr1	22338531	c	chr1	22315374	c
chr1	22338532	t	chr1	22315375	t
chr1	22338533	c	chr1	22315376	c
chr1	22338534	t	chr1	22315377	t
chr1	22338535	g	chr1	22315378	g
chr1	22338536	t	chr1	22315379	t
chr1	22338537	c	chr1	22315380	c
chr1	22338538	t	chr1	22315381	t
chr1	22338539	c	chr1	22315382	c
chr1	22338540	a	chr1	22315383	a
chr1	22338541	a	chr1	22315384	a
chr1	22338542	a	chr1	22315385	a
chr1	22338543	a	chr1	22315386	a
chr1	22338544	a	chr1	22315387	a
chr1	22338545	a	chr1	22315388	g
chr1	22338546	a	chr1	22315389	a
chr1	22338547	a	chr1	22315389	-
chr1	22338548	c	chr1	22315389	-
chr1	22338549	c	chr1	22315389	-
chr1	22338550	a	chr1	22315390	a
chr1	22338551	a	chr1	22315391	a
chr1	22338552	a	chr1	22315392	a
chr1	22338553	a	chr1	22315393	a
chr1	22338554	a	chr1	22315394	a
chr1	22338555	a	chr1	22315395	a
chr1	22338556	a	chr1	22315396	a
chr1	22338557	c	chr1	22315397	c
chr1	22338558	a	chr1	22315398	t
chr1	22338559	a	chr1	22315399	c
chr1	22338560	a	chr1	22315400	c
chr1	22338561	a	chr1	22315401	a
chr1	22338562	a	chr1	22315402	a
chr1	22338563	a	chr1	22315403	a
chr1	22338564	a	chr1	22315404	a
chr1	22338565	a	chr1	22315405	a
chr1	22338566	t	chr1	22315406	t
chr1	22338567	a	chr1	22315407	a
chr1	22338568	t	chr1	22315408	t
chr1	22338569	a	chr1	22315409	a
chr1	22338570	g	chr1	22315410	t
chr1	22338571	a	chr1	22315411	a
chr1	22338572	t	chr1	22315412	t
chr1	22338573	t	chr1	22315413	t
chr1	22338574	t	chr1	22315414	t
chr1	22338575	t	chr1	22315415	t
chr1	22338576	g	chr1	22315416	g
chr1	22338577	t	chr1	22315417	t
chr1	22338578	t	chr1	22315418	t
chr1	22338579	t	chr1	22315419	t
chr1	22338580	a	chr1	22315420	a
chr1	22338581	t	chr1	22315421	t
chr1	22338582	a	chr1	22315422	a
chr1	22338583	t	chr1	22315423	t
chr1	22338584	a	chr1	22315424	a
chr1	22338585	t	chr1	22315425	c
chr1	22338586	a	chr1	22315426	a
chr1	22338587	t	chr1	22315427	t
chr1	22338588	a	chr1	22315428	a
chr1	22338589	c	chr1	22315429	c
chr1	22338590	a	chr1	22315430	a
chr1	22338591	c	chr1	22315431	t
chr1	22338592	a	chr1	22315432	a
chr1	22338593	t	chr1	22315433	c
chr1	22338594	a	chr1	22315433	-
chr1	22338595	c	chr1	22315433	-
chr1	22338596	a	chr1	22315433	-
chr1	22338597	t	chr1	22315433	-
chr1	22338598	a	chr1	22315433	-
chr1	22338599	c	chr1	22315433	-
chr1	22338600	g	chr1	22315433	-
chr1	22338601	t	chr1	22315433	-
chr1	22338602	a	chr1	22315433	-
chr1	22338603	t	chr1	22315433	-
chr1	22338604	a	chr1	22315433	-
chr1	22338605	t	chr1	22315433	-
chr1	22338606	a	chr1	22315433	-
chr1	22338607	t	chr1	22315433	-
chr1	22338608	a	chr1	22315433	-
chr1	22338609	t	chr1	22315433	-
chr1	22338610	a	chr1	22315433	-
chr1	22338611	t	chr1	22315433	-
chr1	22338612	a	chr1	22315433	-
chr1	22338613	c	chr1	22315433	-
chr1	22338614	a	chr1	22315433	-
chr1	22338615	c	chr1	22315433	-
chr1	22338616	a	chr1	22315433	-
chr1	22338617	a	chr1	22315433	-
chr1	22338618	a	chr1	22315434	a
chr1	22338619	c	chr1	22315435	t
chr1	22338620	a	chr1	22315436	a
chr1	22338621	c	chr1	22315437	c
chr1	22338622	a	chr1	22315438	a
chr1	22338623	t	chr1	22315439	t
chr1	22338624	a	chr1	22315440	a
chr1	22338625	c	chr1	22315441	c
chr1	22338626	g	chr1	22315442	a
chr1	22338627	t	chr1	22315443	t
chr1	22338628	a	chr1	22315444	a
chr1	22338629	t	chr1	22315445	t
chr1	22338630	a	chr1	22315446	a
chr1	22338631	t	chr1	22315447	t
chr1	22338632	a	chr1	22315448	a
chr1	22338633	t	chr1	22315449	t
chr1	22338634	a	chr1	22315450	a
chr1	22338635	c	chr1	22315451	c
chr1	22338636	a	chr1	22315452	a
chr1	22338637	c	chr1	22315453	c
chr1	22338638	a	chr1	22315454	a
chr1	22338639	c	chr1	22315455	c
chr1	22338640	a	chr1	22315456	a
chr1	22338641	a	chr1	22315457	c
chr1	22338642	a	chr1	22315458	a
chr1	22338643	t	chr1	22315459	g
chr1	22338644	a	chr1	22315460	a
chr1	22338645	c	chr1	22315461	c
chr1	22338646	g	chr1	22315462	g
chr1	22338647	t	chr1	22315463	t
chr1	22338648	a	chr1	22315464	a
chr1	22338649	t	chr1	22315465	t
chr1	22338650	a	chr1	22315466	a
chr1	22338651	t	chr1	22315467	t
chr1	22338652	a	chr1	22315468	a
chr1	22338653	t	chr1	22315469	t
chr1	22338654	a	chr1	22315470	a
chr1	22338655	t	chr1	22315471	t
chr1	22338656	a	chr1	22315472	a
chr1	22338657	c	chr1	22315473	c
chr1	22338658	a	chr1	22315474	a
chr1	22338659	c	chr1	22315475	c
chr1	22338660	a	chr1	22315475	-
chr1	22338661	c	chr1	22315475	-
chr1	22338662	a	chr1	22315475	-
chr1	22338663	c	chr1	22315475	-
chr1	22338664	a	chr1	22315475	-
chr1	22338665	c	chr1	22315475	-
chr1	22338666	a	chr1	22315475	-
chr1	22338667	t	chr1	22315475	-
chr1	22338668	a	chr1	22315475	-
chr1	22338669	t	chr1	22315475	-
chr1	22338670	a	chr1	22315476	a
chr1	22338671	c	chr1	22315477	c
chr1	22338672	a	chr1	22315478	a
chr1	22338673	c	chr1	22315479	c
chr1	22338674	a	chr1	22315480	a
chr1	22338675	c	chr1	22315481	c
chr1	22338676	a	chr1	22315482	a
chr1	22338677	c	chr1	22315483	c
chr1	22338678	a	chr1	22315484	a
chr1	22338679	t	chr1	22315485	t
chr1	22338680	g	chr1	22315486	a
chr1	22338681	c	chr1	22315487	t
chr1	22338682	a	chr1	22315488	a
chr1	22338683	t	chr1	22315489	t
chr1	22338684	a	chr1	22315490	a
chr1	22338685	t	chr1	22315491	t
chr1	22338686	a	chr1	22315492	g
chr1	22338687	c	chr1	22315493	t
chr1	22338688	a	chr1	22315494	a
chr1	22338689	t	chr1	22315495	t
chr1	22338690	a	chr1	22315496	a
chr1	22338691	t	chr1	22315497	t
chr1	22338692	a	chr1	22315498	a
chr1	22338693	t	chr1	22315499	t
chr1	22338694	a	chr1	22315500	a
chr1	22338695	t	chr1	22315501	t
chr1	22338696	a	chr1	22315502	c
chr1	22338697	t	chr1	22315503	t
chr1	22338698	a	chr1	22315504	a
chr1	22338699	c	chr1	22315505	t
chr1	22338700	a	chr1	22315506	g
chr1	22338701	t	chr1	22315507	c
chr1	22338702	a	chr1	22315508	a
chr1	22338703	c	chr1	22315509	c
chr1	22338704	a	chr1	22315510	a
chr1	22338705	c	chr1	22315511	c
chr1	22338706	a	chr1	22315512	a
chr1	22338707	t	chr1	22315513	t
chr1	22338708	c	chr1	22315514	c
chr1	22338709	c	chr1	22315515	c
chr1	22338710	c	chr1	22315516	c
chr1	22338711	a	chr1	22315517	a
chr1	22338712	t	chr1	22315518	t
chr1	22338713	c	chr1	22315519	c
chr1	22338714	t	chr1	22315520	t
chr1	22338715	a	chr1	22315521	a
chr1	22338716	a	chr1	22315522	a
chr1	22338717	a	chr1	22315523	a
chr1	22338718	t	chr1	22315524	t
chr1	22338719	t	chr1	22315525	t
chr1	22338720	t	chr1	22315526	c
chr1	22338721	g	chr1	22315527	a
chr1	22338722	t	chr1	22315528	t
chr1	22338723	g	chr1	22315529	g
chr1	22338724	c	chr1	22315530	c
chr1	22338725	t	chr1	22315531	t
chr1	22338726	g	chr1	22315532	g
chr1	22338727	g	chr1	22315533	g
chr1	22338728	g	chr1	22315534	c
chr1	22338729	c	chr1	22315535	c
chr1	22338730	a	chr1	22315536	a
chr1	22338731	t	chr1	22315537	t
chr1	22338732	t	chr1	22315538	t
chr1	22338733	g	chr1	22315539	g
chr1	22338734	t	chr1	22315540	t
chr1	22338735	a	chr1	22315541	a
chr1	22338736	a	chr1	22315542	g
chr1	22338737	a	chr1	22315543	a
chr1	22338738	g	chr1	22315544	g
chr1	22338739	a	chr1	22315545	a
chr1	22338740	g	chr1	22315546	g
chr1	22338741	a	chr1	22315547	a
chr1	22338742	a	chr1	22315548	a
chr1	22338743	c	chr1	22315549	c
chr1	22338744	c	chr1	22315550	c
chr1	22338745	t	chr1	22315551	t
chr1	22338746	t	chr1	22315552	t
chr1	22338747	a	chr1	22315553	a
chr1	22338748	g	chr1	22315554	g
chr1	22338749	t	chr1	22315555	t
chr1	22338750	t	chr1	22315556	t
chr1	22338751	a	chr1	22315557	a
chr1	22338752	a	chr1	22315558	a
chr1	22338753	c	chr1	22315559	c
chr1	22338754	a	chr1	22315560	a
chr1	22338755	a	chr1	22315561	a
chr1	22338756	t	chr1	22315562	t
chr1	22338757	t	chr1	22315563	t
chr1	22338758	t	chr1	22315564	t
chr1	22338759	a	chr1	22315565	a
chr1	22338760	a	chr1	22315566	a
chr1	22338761	t	chr1	22315567	t
chr1	22338762	c	chr1	22315568	c
chr1	22338763	a	chr1	22315569	a
chr1	22338764	a	chr1	22315570	a
chr1	22338765	g	chr1	22315571	g
chr1	22338766	a	chr1	22315572	a
chr1	22338767	a	chr1	22315573	a
chr1	22338768	c	chr1	22315574	c
chr1	22338769	c	chr1	22315575	c
chr1	22338770	c	chr1	22315576	c
chr1	22338771	c	chr1	22315577	c
chr1	22338772	c	chr1	22315578	c
chr1	22338773	c	chr1	22315579	c
chr1	22338774	c	chr1	22315580	c
chr1	22338775	a	chr1	22315581	a
chr1	22338776	t	chr1	22315582	t
chr1	22338777	g	chr1	22315583	g
chr1	22338778	a	chr1	22315584	a
chr1	22338779	g	chr1	22315585	g
chr1	22338780	g	chr1	22315586	g
chr1	22338781	t	chr1	22315587	t
chr1	22338782	a	chr1	22315588	a
chr1	22338783	a	chr1	22315589	a
chr1	22338784	g	chr1	22315590	g
chr1	22338785	t	chr1	22315591	t
chr1	22338786	t	chr1	22315592	t
chr1	22338787	c	chr1	22315593	c
chr1	22338787	-	chr1	22315594	t
chr1	22338787	-	chr1	22315595	a
chr1	22338787	-	chr1	22315596	t
chr1	22338787	-	chr1	22315597	c
chr1	22338787	-	chr1	22315598	a
chr1	22338787	-	chr1	22315599	t
chr1	22338788	t	chr1	22315600	t
chr1	22338789	a	chr1	22315601	a
chr1	22338790	t	chr1	22315602	t
chr1	22338791	c	chr1	22315603	c
chr1	22338792	c	chr1	22315604	c
chr1	22338793	c	chr1	22315605	c
chr1	22338794	t	chr1	22315606	t
chr1	22338795	a	chr1	22315607	a
chr1	22338796	c	chr1	22315608	c
chr1	22338797	t	chr1	22315609	t
chr1	22338798	a	chr1	22315610	a
chr1	22338799	c	chr1	22315611	c
chr1	22338800	a	chr1	22315612	a
chr1	22338801	t	chr1	22315613	t
chr1	22338802	a	chr1	22315614	a
chr1	22338803	g	chr1	22315615	g
chr1	22338804	a	chr1	22315616	a
chr1	22338805	g	chr1	22315617	g
chr1	22338806	g	chr1	22315618	g
chr1	22338807	a	chr1	22315619	a
chr1	22338808	g	chr1	22315620	g
chr1	22338809	g	chr1	22315621	g
chr1	22338810	a	chr1	22315622	a
chr1	22338811	a	chr1	22315623	a
chr1	22338812	a	chr1	22315624	a
chr1	22338813	c	chr1	22315625	c
chr1	22338814	t	chr1	22315626	t
chr1	22338815	g	chr1	22315627	g
chr1	22338816	a	chr1	22315628	a
chr1	22338817	g	chr1	22315629	g
chr1	22338818	g	chr1	22315630	g
chr1	22338819	c	chr1	22315631	c
chr1	22338820	t	chr1	22315632	t
chr1	22338821	c	chr1	22315633	c
chr1	22338822	a	chr1	22315634	a
chr1	22338823	g	chr1	22315635	g
chr1	22338824	a	chr1	22315636	a
chr1	22338825	g	chr1	22315637	g
chr1	22338826	a	chr1	22315638	a
chr1	22338827	g	chr1	22315639	g
chr1	22338828	g	chr1	22315640	g
chr1	22338829	t	chr1	22315641	t
chr1	22338830	c	chr1	22315642	c
chr1	22338831	a	chr1	22315643	a
chr1	22338832	a	chr1	22315644	a
chr1	22338833	t	chr1	22315645	t
chr1	22338834	c	chr1	22315646	t
chr1	22338835	c	chr1	22315647	c
chr1	22338836	c	chr1	22315648	c
chr1	22338837	t	chr1	22315649	t
chr1	22338838	c	chr1	22315650	c
chr1	22338839	t	chr1	22315651	t
chr1	22338840	c	chr1	22315652	c
chr1	22338841	c	chr1	22315653	c
chr1	22338842	c	chr1	22315654	c
chr1	22338843	a	chr1	22315655	a
chr1	22338844	g	chr1	22315656	g
chr1	22338845	g	chr1	22315657	g
chr1	22338846	g	chr1	22315658	g
chr1	22338847	t	chr1	22315659	t
chr1	22338848	c	chr1	22315660	c
chr1	22338849	a	chr1	22315661	a
chr1	22338850	c	chr1	22315662	c
chr1	22338851	a	chr1	22315663	a
chr1	22338852	c	chr1	22315664	c
chr1	22338853	a	chr1	22315665	a
chr1	22338854	g	chr1	22315666	g
chr1	22338855	c	chr1	22315667	c
chr1	22338856	a	chr1	22315668	a
chr1	22338857	g	chr1	22315669	g
chr1	22338858	g	chr1	22315670	g
chr1	22338859	g	chr1	22315671	g
chr1	22338860	c	chr1	22315672	c
chr1	22338861	t	chr1	22315673	t
chr1	22338862	g	chr1	22315674	g
chr1	22338863	g	chr1	22315675	g
chr1	22338864	a	chr1	22315676	a
chr1	22338865	a	chr1	22315677	a
chr1	22338866	g	chr1	22315678	g
chr1	22338867	t	chr1	22315679	t
chr1	22338868	t	chr1	22315680	t
chr1	22338869	g	chr1	22315681	g
chr1	22338870	a	chr1	22315682	a
chr1	22338871	a	chr1	22315683	a
chr1	22338872	c	chr1	22315684	c
chr1	22338873	c	chr1	22315685	c
chr1	22338874	c	chr1	22315686	c
chr1	22338875	a	chr1	22315687	a
chr1	22338876	g	chr1	22315688	g
chr1	22338877	t	chr1	22315689	t
chr1	22338878	t	chr1	22315690	t
chr1	22338879	t	chr1	22315691	t
chr1	22338880	c	chr1	22315692	c
chr1	22338881	a	chr1	22315693	a
chr1	22338882	t	chr1	22315694	t
chr1	22338883	c	chr1	22315695	c
chr1	22338884	t	chr1	22315696	t
chr1	22338885	g	chr1	22315697	g
chr1	22338886	a	chr1	22315698	a
chr1	22338887	c	chr1	22315699	c
chr1	22338888	t	chr1	22315700	t
chr1	22338889	c	chr1	22315701	c
chr1	22338890	c	chr1	22315702	c
chr1	22338891	a	chr1	22315703	a
chr1	22338892	g	chr1	22315704	g
chr1	22338893	a	chr1	22315705	a
chr1	22338894	a	chr1	22315706	a
chr1	22338895	c	chr1	22315707	c
chr1	22338896	c	chr1	22315708	c
chr1	22338897	t	chr1	22315709	t
chr1	22338898	g	chr1	22315710	g
chr1	22338899	t	chr1	22315711	t
chr1	22338900	g	chr1	22315712	g
chr1	22338901	c	chr1	22315713	c
chr1	22338902	t	chr1	22315714	t
chr1	22338903	c	chr1	22315715	c
chr1	22338904	c	chr1	22315716	c
chr1	22338905	t	chr1	22315717	t
chr1	22338906	a	chr1	22315718	a
chr1	22338907	a	chr1	22315719	a
chr1	22338908	a	chr1	22315720	a
chr1	22338909	t	chr1	22315721	t
chr1	22338910	t	chr1	22315722	t
chr1	22338911	g	chr1	22315723	g
chr1	22338912	a	chr1	22315724	a
chr1	22338913	c	chr1	22315725	c
chr1	22338914	t	chr1	22315726	t
chr1	22338915	a	chr1	22315727	a
chr1	22338916	t	chr1	22315728	t
chr1	22338917	t	chr1	22315729	t
chr1	22338918	c	chr1	22315730	c
chr1	22338919	t	chr1	22315731	t
chr1	22338920	g	chr1	22315732	g
chr1	22338921	t	chr1	22315733	t
chr1	22338922	c	chr1	22315734	c
chr1	22338923	t	chr1	22315735	t
chr1	22338924	g	chr1	22315736	g
chr1	22338925	c	chr1	22315737	c
chr1	22338926	c	chr1	22315738	c
chr1	22338927	c	chr1	22315739	c
chr1	22338928	c	chr1	22315740	c
chr1	22338929	c	chr1	22315741	c
chr1	22338930	c	chr1	22315742	c
chr1	22338931	c	chr1	22315743	c
chr1	22338932	a	chr1	22315744	a
chr1	22338933	a	chr1	22315745	a
chr1	22338934	c	chr1	22315746	c
chr1	22338935	t	chr1	22315747	t
chr1	22338936	t	chr1	22315748	t
chr1	22338937	t	chr1	22315749	t
chr1	22338938	t	chr1	22315750	t
chr1	22338939	c	chr1	22315751	c
chr1	22338940	c	chr1	22315752	c
chr1	22338941	a	chr1	22315753	a
chr1	22338942	g	chr1	22315754	g
chr1	22338943	a	chr1	22315755	a
chr1	22338944	c	chr1	22315756	c
chr1	22338945	c	chr1	22315757	c
chr1	22338946	a	chr1	22315758	a
chr1	22338947	t	chr1	22315759	t
chr1	22338948	a	chr1	22315760	a
chr1	22338949	g	chr1	22315761	g
chr1	22338950	c	chr1	22315762	c
chr1	22338951	a	chr1	22315763	a
chr1	22338952	a	chr1	22315764	a
chr1	22338953	g	chr1	22315765	g
chr1	22338954	c	chr1	22315766	c
chr1	22338955	c	chr1	22315767	c
chr1	22338956	a	chr1	22315768	a
chr1	22338957	c	chr1	22315769	c
chr1	22338958	t	chr1	22315770	t
chr1	22338959	a	chr1	22315771	a
chr1	22338960	g	chr1	22315772	g
chr1	22338961	a	chr1	22315773	a
chr1	22338962	a	chr1	22315774	a
chr1	22338963	c	chr1	22315775	c
chr1	22338964	c	chr1	22315776	c
chr1	22338965	a	chr1	22315777	a
chr1	22338966	a	chr1	22315778	a
chr1	22338967	g	chr1	22315779	g
chr1	22338968	g	chr1	22315780	g
chr1	22338969	c	chr1	22315781	c
chr1	22338970	c	chr1	22315782	c
chr1	22338971	c	chr1	22315783	c
chr1	22338972	a	chr1	22315784	a
chr1	22338973	g	chr1	22315785	g
chr1	22338974	c	chr1	22315786	c
chr1	22338975	t	chr1	22315787	t
chr1	22338976	g	chr1	22315788	g
chr1	22338977	g	chr1	22315789	g
chr1	22338978	c	chr1	22315790	c
chr1	22338979	a	chr1	22315791	a
chr1	22338980	g	chr1	22315792	g
chr1	22338981	t	chr1	22315793	t
chr1	22338982	g	chr1	22315794	g
chr1	22338983	c	chr1	22315795	c
chr1	22338984	t	chr1	22315796	t
chr1	22338985	g	chr1	22315797	g
chr1	22338986	a	chr1	22315798	a
chr1	22338987	t	chr1	22315799	t
chr1	22338988	c	chr1	22315800	c
chr1	22338989	g	chr1	22315801	g
chr1	22338990	a	chr1	22315802	a
chr1	22338991	t	chr1	22315803	t
chr1	22338992	c	chr1	22315804	c
chr1	22338993	c	chr1	22315805	c
chr1	22338994	c	chr1	22315806	c
chr1	22338995	a	chr1	22315807	a
chr1	22338996	c	chr1	22315808	c
chr1	22338997	a	chr1	22315809	a
chr1	22338998	t	chr1	22315810	t
chr1	22338999	c	chr1	22315811	c
chr1	22339000	c	chr1	22315812	c
chr1	22339001	t	chr1	22315813	t
chr1	22339002	g	chr1	22315814	g
chr1	22339003	a	chr1	22315815	a
chr1	22339004	a	chr1	22315816	a
chr1	22339005	t	chr1	22315817	t
chr1	22339006	a	chr1	22315818	a
chr1	22339007	a	chr1	22315819	a
chr1	22339008	a	chr1	22315820	a
chr1	22339009	g	chr1	22315821	g
chr1	22339010	a	chr1	22315822	a
chr1	22339011	a	chr1	22315823	a
chr1	22339012	t	chr1	22315824	t
chr1	22339013	a	chr1	22315825	a
chr1	22339014	a	chr1	22315826	a
chr1	22339015	a	chr1	22315827	a
chr1	22339016	g	chr1	22315828	g
chr1	22339017	a	chr1	22315829	a
chr1	22339018	t	chr1	22315830	t
chr1	22339019	c	chr1	22315831	c
chr1	22339020	t	chr1	22315832	t
chr1	22339021	c	chr1	22315833	c
chr1	22339022	t	chr1	22315834	t
chr1	22339023	c	chr1	22315835	c
chr1	22339024	a	chr1	22315836	a
chr1	22339025	g	chr1	22315837	g
chr1	22339026	a	chr1	22315838	a
chr1	22339027	a	chr1	22315839	a
chr1	22339028	a	chr1	22315840	a
chr1	22339029	a	chr1	22315841	a
chr1	22339030	t	chr1	22315842	t
chr1	22339031	t	chr1	22315843	t
chr1	22339032	c	chr1	22315844	c
chr1	22339033	c	chr1	22315845	c
chr1	22339034	a	chr1	22315846	a
chr1	22339035	a	chr1	22315847	a
chr1	22339036	g	chr1	22315848	g
chr1	22339037	t	chr1	22315849	t
chr1	22339038	t	chr1	22315850	t
chr1	22339039	g	chr1	22315851	g
chr1	22339040	a	chr1	22315852	a
chr1	22339041	a	chr1	22315853	a
chr1	22339042	t	chr1	22315854	t
chr1	22339043	c	chr1	22315855	c
chr1	22339044	t	chr1	22315856	t
chr1	22339045	t	chr1	22315857	t
chr1	22339046	t	chr1	22315858	t
chr1	22339047	c	chr1	22315859	c
chr1	22339048	t	chr1	22315860	t
chr1	22339049	t	chr1	22315861	t
chr1	22339050	t	chr1	22315862	t
chr1	22339051	c	chr1	22315863	c
chr1	22339052	t	chr1	22315864	t
chr1	22339053	t	chr1	22315865	t
chr1	22339054	t	chr1	22315866	t
chr1	22339055	g	chr1	22315867	g
chr1	22339056	t	chr1	22315868	t
chr1	22339057	t	chr1	22315869	t
chr1	22339058	g	chr1	22315870	g
chr1	22339059	a	chr1	22315871	a
chr1	22339060	c	chr1	22315872	c
chr1	22339061	t	chr1	22315873	t
chr1	22339062	c	chr1	22315874	c
chr1	22339063	a	chr1	22315875	a
chr1	22339064	c	chr1	22315876	c
chr1	22339065	c	chr1	22315877	c
chr1	22339066	t	chr1	22315878	t
chr1	22339067	c	chr1	22315879	c
chr1	22339068	t	chr1	22315880	t
chr1	22339069	t	chr1	22315881	t
chr1	22339070	c	chr1	22315882	c
chr1	22339071	c	chr1	22315883	c
chr1	22339072	c	chr1	22315884	c
chr1	22339073	c	chr1	22315885	c
chr1	22339074	t	chr1	22315886	t
chr1	22339075	c	chr1	22315887	c
chr1	22339076	t	chr1	22315888	t
chr1	22339077	g	chr1	22315889	g
chr1	22339078	g	chr1	22315890	g
chr1	22339079	c	chr1	22315891	c
chr1	22339080	c	chr1	22315892	c
chr1	22339081	t	chr1	22315893	t
chr1	22339082	g	chr1	22315894	g
chr1	22339083	t	chr1	22315895	t
chr1	22339084	t	chr1	22315896	t
chr1	22339085	c	chr1	22315897	c
chr1	22339086	c	chr1	22315898	c
chr1	22339087	t	chr1	22315899	t
chr1	22339088	a	chr1	22315900	a
chr1	22339089	a	chr1	22315901	a
chr1	22339090	a	chr1	22315902	a
chr1	22339091	a	chr1	22315903	a
chr1	22339092	t	chr1	22315904	t
chr1	22339093	c	chr1	22315905	c
chr1	22339094	t	chr1	22315906	t
chr1	22339095	t	chr1	22315907	t
chr1	22339096	a	chr1	22315908	a
chr1	22339097	g	chr1	22315909	g
chr1	22339098	a	chr1	22315910	a
chr1	22339099	t	chr1	22315911	t
chr1	22339100	c	chr1	22315912	c
chr1	22339101	t	chr1	22315913	t
chr1	22339102	c	chr1	22315914	c
chr1	22339103	a	chr1	22315915	a
chr1	22339104	t	chr1	22315916	t
chr1	22339105	a	chr1	22315917	a
chr1	22339106	t	chr1	22315918	t
chr1	22339107	g	chr1	22315919	g
chr1	22339108	c	chr1	22315920	c
chr1	22339109	a	chr1	22315921	a
chr1	22339110	g	chr1	22315922	g
chr1	22339111	a	chr1	22315923	a
chr1	22339112	g	chr1	22315924	g
chr1	22339113	a	chr1	22315925	a
chr1	22339114	c	chr1	22315926	c
chr1	22339115	a	chr1	22315927	a
chr1	22339116	g	chr1	22315928	g
chr1	22339117	g	chr1	22315929	g
chr1	22339118	a	chr1	22315930	a
chr1	22339119	c	chr1	22315931	c
chr1	22339120	c	chr1	22315932	c
chr1	22339121	a	chr1	22315933	a
chr1	22339122	g	chr1	22315934	g
chr1	22339123	g	chr1	22315935	g
chr1	22339124	t	chr1	22315936	t
chr1	22339125	c	chr1	22315937	c
chr1	22339126	c	chr1	22315938	c
chr1	22339127	a	chr1	22315939	a
chr1	22339128	a	chr1	22315940	a
chr1	22339129	c	chr1	22315941	c
chr1	22339130	c	chr1	22315942	c
chr1	22339131	c	chr1	22315943	c
chr1	22339132	t	chr1	22315944	t
chr1	22339133	t	chr1	22315945	t
chr1	22339134	t	chr1	22315946	t
chr1	22339135	c	chr1	22315947	c
chr1	22339136	a	chr1	22315948	a
chr1	22339137	t	chr1	22315949	t
chr1	22339138	a	chr1	22315950	a
chr1	22339139	c	chr1	22315951	c
chr1	22339140	g	chr1	22315952	g
chr1	22339141	a	chr1	22315953	a
chr1	22339142	a	chr1	22315954	a
chr1	22339143	g	chr1	22315955	g
chr1	22339144	a	chr1	22315956	a
chr1	22339145	t	chr1	22315957	t
chr1	22339146	g	chr1	22315958	g
chr1	22339147	a	chr1	22315959	a
chr1	22339148	g	chr1	22315960	g
chr1	22339149	g	chr1	22315961	g
chr1	22339150	g	chr1	22315962	g
chr1	22339151	a	chr1	22315963	a
chr1	22339152	a	chr1	22315964	a
chr1	22339153	a	chr1	22315965	a
chr1	22339154	a	chr1	22315966	a
chr1	22339155	a	chr1	22315967	a
chr1	22339156	t	chr1	22315968	t
chr1	22339157	g	chr1	22315969	g
chr1	22339158	a	chr1	22315970	a
chr1	22339159	t	chr1	22315971	t
chr1	22339160	g	chr1	22315972	g
chr1	22339161	c	chr1	22315973	c
chr1	22339162	t	chr1	22315974	t
chr1	22339163	g	chr1	22315975	g
chr1	22339164	g	chr1	22315976	g
chr1	22339165	g	chr1	22315977	g
chr1	22339166	a	chr1	22315978	a
chr1	22339167	g	chr1	22315979	g
chr1	22339168	a	chr1	22315980	a
chr1	22339169	g	chr1	22315981	g
chr1	22339170	a	chr1	22315982	a
chr1	22339171	a	chr1	22315983	a
chr1	22339172	g	chr1	22315984	g
chr1	22339173	g	chr1	22315985	g
chr1	22339174	g	chr1	22315986	g
chr1	22339175	a	chr1	22315987	a
chr1	22339176	g	chr1	22315988	g
chr1	22339177	t	chr1	22315989	t
chr1	22339178	t	chr1	22315990	t
chr1	22339179	g	chr1	22315991	g
chr1	22339180	c	chr1	22315992	c
chr1	22339181	t	chr1	22315993	t
chr1	22339182	g	chr1	22315994	g
chr1	22339183	t	chr1	22315995	t
chr1	22339184	g	chr1	22315996	g
chr1	22339185	c	chr1	22315997	c
chr1	22339186	g	chr1	22315998	g
chr1	22339187	g	chr1	22315999	g
chr1	22339188	t	chr1	22316000	t
chr1	22339189	g	chr1	22316001	g
chr1	22339190	a	chr1	22316002	a
chr1	22339191	c	chr1	22316003	c
chr1	22339192	c	chr1	22316004	c
chr1	22339193	t	chr1	22316005	t
chr1	22339194	g	chr1	22316006	g
chr1	22339195	a	chr1	22316007	a
chr1	22339196	c	chr1	22316008	c
chr1	22339197	c	chr1	22316009	c
chr1	22339198	a	chr1	22316010	a
chr1	22339199	t	chr1	22316011	t
chr1	22339200	c	chr1	22316012	c
chr1	22339201	c	chr1	22316013	c
chr1	22339202	t	chr1	22316014	t
chr1	22339203	g	chr1	22316015	g
chr1	22339204	g	chr1	22316016	g
chr1	22339205	t	chr1	22316017	t
chr1	22339206	t	chr1	22316018	t
chr1	22339207	t	chr1	22316019	t
chr1	22339208	g	chr1	22316020	g
chr1	22339209	c	chr1	22316021	c
chr1	22339210	c	chr1	22316022	c
chr1	22339211	t	chr1	22316023	t
chr1	22339212	g	chr1	22316024	g
chr1	22339213	g	chr1	22316025	g
chr1	22339214	a	chr1	22316026	a
chr1	22339215	a	chr1	22316027	a
chr1	22339216	c	chr1	22316028	c
chr1	22339217	t	chr1	22316029	t
chr1	22339218	t	chr1	22316030	t
chr1	22339219	c	chr1	22316031	c
chr1	22339220	a	chr1	22316032	a
chr1	22339221	g	chr1	22316033	g
chr1	22339222	g	chr1	22316034	g
chr1	22339223	a	chr1	22316035	a
chr1	22339224	g	chr1	22316036	g
chr1	22339225	t	chr1	22316037	t
chr1	22339226	g	chr1	22316038	g
chr1	22339227	a	chr1	22316039	a
chr1	22339228	a	chr1	22316040	a
chr1	22339229	g	chr1	22316041	g
chr1	22339230	a	chr1	22316042	a
chr1	22339231	c	chr1	22316043	c
chr1	22339232	a	chr1	22316044	a
chr1	22339233	c	chr1	22316045	c
chr1	22339234	t	chr1	22316046	t
chr1	22339235	g	chr1	22316047	g
chr1	22339236	g	chr1	22316048	g
chr1	22339237	a	chr1	22316049	a
chr1	22339238	c	chr1	22316050	c
chr1	22339239	a	chr1	22316051	a
chr1	22339240	t	chr1	22316052	t
chr1	22339241	t	chr1	22316053	t
chr1	22339242	t	chr1	22316054	t
chr1	22339243	a	chr1	22316055	a
chr1	22339244	a	chr1	22316056	a
chr1	22339245	t	chr1	22316057	t
chr1	22339246	g	chr1	22316058	g
chr1	22339247	c	chr1	22316059	c
chr1	22339248	t	chr1	22316060	t
chr1	22339249	a	chr1	22316061	a
chr1	22339250	a	chr1	22316062	a
chr1	22339251	a	chr1	22316063	a
chr1	22339252	a	chr1	22316064	a
chr1	22339253	c	chr1	22316065	c
chr1	22339254	t	chr1	22316066	t
chr1	22339255	g	chr1	22316067	g
chr1	22339256	g	chr1	22316068	g
chr1	22339257	g	chr1	22316069	g
chr1	22339258	a	chr1	22316070	a
chr1	22339259	a	chr1	22316071	a
chr1	22339260	g	chr1	22316072	g
chr1	22339261	g	chr1	22316073	g
chr1	22339262	t	chr1	22316074	t
chr1	22339263	a	chr1	22316075	a
chr1	22339264	c	chr1	22316076	c
chr1	22339265	c	chr1	22316077	c
chr1	22339266	a	chr1	22316078	a
chr1	22339267	g	chr1	22316079	g
chr1	22339268	g	chr1	22316080	g
chr1	22339269	a	chr1	22316081	a
chr1	22339270	a	chr1	22316082	a
chr1	22339271	a	chr1	22316083	a
chr1	22339272	a	chr1	22316084	a
chr1	22339273	a	chr1	22316085	a
chr1	22339274	t	chr1	22316086	t
chr1	22339275	g	chr1	22316087	g
chr1	22339276	g	chr1	22316088	g
chr1	22339277	g	chr1	22316089	g
chr1	22339278	a	chr1	22316090	a
chr1	22339279	c	chr1	22316091	c
chr1	22339280	a	chr1	22316092	a
chr1	22339281	a	chr1	22316093	a
chr1	22339282	g	chr1	22316094	g
chr1	22339283	t	chr1	22316095	t
chr1	22339284	t	chr1	22316096	t
chr1	22339285	g	chr1	22316097	g
chr1	22339286	g	chr1	22316098	g
chr1	22339287	t	chr1	22316099	t
chr1	22339288	c	chr1	22316100	c
chr1	22339289	g	chr1	22316101	g
chr1	22339290	c	chr1	22316102	c
chr1	22339291	c	chr1	22316103	c
chr1	22339292	t	chr1	22316104	t
chr1	22339293	t	chr1	22316105	t
chr1	22339294	a	chr1	22316106	a
chr1	22339295	g	chr1	22316107	g
chr1	22339296	t	chr1	22316108	t
chr1	22339297	a	chr1	22316109	a
chr1	22339298	t	chr1	22316110	t
chr1	22339299	a	chr1	22316111	a
chr1	22339300	t	chr1	22316112	t
chr1	22339301	a	chr1	22316113	a
chr1	22339302	g	chr1	22316114	g
chr1	22339303	t	chr1	22316115	t
chr1	22339304	c	chr1	22316116	c
chr1	22339305	g	chr1	22316117	g
chr1	22339306	c	chr1	22316118	c
chr1	22339307	a	chr1	22316119	a
chr1	22339308	c	chr1	22316120	c
chr1	22339309	a	chr1	22316121	a
chr1	22339310	t	chr1	22316122	t
chr1	22339311	a	chr1	22316123	a
chr1	22339312	a	chr1	22316124	a
chr1	22339313	g	chr1	22316125	g
chr1	22339314	t	chr1	22316126	t
chr1	22339315	c	chr1	22316127	c
chr1	22339316	a	chr1	22316128	a
chr1	22339317	g	chr1	22316129	g
chr1	22339318	t	chr1	22316130	t
chr1	22339319	a	chr1	22316131	a
chr1	22339320	g	chr1	22316132	g
chr1	22339321	c	chr1	22316133	c
chr1	22339322	t	chr1	22316134	t
chr1	22339323	t	chr1	22316135	t
chr1	22339324	t	chr1	22316136	t
chr1	22339325	t	chr1	22316137	t
chr1	22339326	c	chr1	22316138	c
chr1	22339327	a	chr1	22316139	a
chr1	22339328	a	chr1	22316140	a
chr1	22339329	t	chr1	22316141	t
chr1	22339330	g	chr1	22316142	g
chr1	22339331	c	chr1	22316143	c
chr1	22339332	a	chr1	22316144	a
chr1	22339333	g	chr1	22316145	g
chr1	22339334	g	chr1	22316146	g
chr1	22339335	c	chr1	22316147	c
chr1	22339336	a	chr1	22316148	a
chr1	22339337	t	chr1	22316149	t
chr1	22339338	a	chr1	22316150	a
chr1	22339339	t	chr1	22316151	t
chr1	22339340	a	chr1	22316152	a
chr1	22339341	a	chr1	22316153	a
chr1	22339342	a	chr1	22316154	a
chr1	22339343	c	chr1	22316155	c
chr1	22339344	a	chr1	22316156	a
chr1	22339345	t	chr1	22316157	t
chr1	22339346	g	chr1	22316158	g
chr1	22339347	g	chr1	22316159	g
chr1	22339348	t	chr1	22316160	t
chr1	22339349	a	chr1	22316161	a
chr1	22339350	a	chr1	22316162	a
chr1	22339351	a	chr1	22316163	a
chr1	22339352	a	chr1	22316164	a
chr1	22339353	c	chr1	22316165	a
chr1	22339354	t	chr1	22316166	t
chr1	22339355	c	chr1	22316167	c
chr1	22339356	t	chr1	22316168	t
chr1	22339357	g	chr1	22316169	g
chr1	22339358	c	chr1	22316170	c
chr1	22339359	a	chr1	22316171	a
chr1	22339360	g	chr1	22316172	g
chr1	22339361	a	chr1	22316173	a
chr1	22339362	t	chr1	22316174	t
chr1	22339363	a	chr1	22316175	a
chr1	22339364	a	chr1	22316176	a
chr1	22339365	a	chr1	22316177	a
chr1	22339366	c	chr1	22316178	c
chr1	22339367	a	chr1	22316179	a
chr1	22339368	g	chr1	22316180	g
chr1	22339369	a	chr1	22316181	a
chr1	22339370	c	chr1	22316182	c
chr1	22339371	c	chr1	22316183	c
chr1	22339372	c	chr1	22316184	c
chr1	22339373	t	chr1	22316185	t
chr1	22339374	g	chr1	22316186	g
chr1	22339375	c	chr1	22316187	c
chr1	22339376	c	chr1	22316188	c
chr1	22339377	a	chr1	22316189	a
chr1	22339378	g	chr1	22316190	g
chr1	22339379	c	chr1	22316191	c
chr1	22339380	c	chr1	22316192	c
chr1	22339381	c	chr1	22316193	c
chr1	22339382	t	chr1	22316194	c
chr1	22339383	t	chr1	22316195	t
chr1	22339384	g	chr1	22316196	c
chr1	22339385	a	chr1	22316197	a
chr1	22339386	g	chr1	22316198	g
chr1	22339387	g	chr1	22316199	c
chr1	22339388	a	chr1	22316200	a
chr1	22339389	g	chr1	22316201	g
chr1	22339390	g	chr1	22316202	g
chr1	22339391	c	chr1	22316203	c
chr1	22339392	t	chr1	22316204	t
chr1	22339393	c	chr1	22316205	c
chr1	22339394	a	chr1	22316206	a
chr1	22339395	t	chr1	22316207	t
chr1	22339396	g	chr1	22316208	g
chr1	22339397	g	chr1	22316209	g
chr1	22339398	t	chr1	22316210	t
chr1	22339399	a	chr1	22316211	a
chr1	22339400	g	chr1	22316212	g
chr1	22339401	a	chr1	22316213	a
chr1	22339402	g	chr1	22316214	g
chr1	22339403	t	chr1	22316215	t
chr1	22339404	g	chr1	22316216	g
chr1	22339405	g	chr1	22316217	g
chr1	22339406	g	chr1	22316218	g
chr1	22339407	a	chr1	22316219	a
chr1	22339408	a	chr1	22316220	a
chr1	22339409	g	chr1	22316221	g
chr1	22339410	g	chr1	22316222	g
chr1	22339411	a	chr1	22316223	a
chr1	22339412	c	chr1	22316224	c
chr1	22339413	a	chr1	22316225	a
chr1	22339414	a	chr1	22316226	a
chr1	22339415	t	chr1	22316227	t
chr1	22339416	g	chr1	22316228	g
chr1	22339417	t	chr1	22316229	t
chr1	22339418	g	chr1	22316230	g
chr1	22339419	t	chr1	22316231	t
chr1	22339420	g	chr1	22316232	g
chr1	22339421	t	chr1	22316233	a
chr1	22339422	t	chr1	22316234	t
chr1	22339423	c	chr1	22316235	c
chr1	22339424	t	chr1	22316236	t
chr1	22339425	g	chr1	22316237	g
chr1	22339426	c	chr1	22316238	c
chr1	22339427	t	chr1	22316239	t
chr1	22339428	t	chr1	22316240	t
chr1	22339429	c	chr1	22316241	c
chr1	22339430	c	chr1	22316242	c
chr1	22339431	a	chr1	22316243	a
chr1	22339432	c	chr1	22316244	c
chr1	22339433	t	chr1	22316245	t
chr1	22339434	g	chr1	22316246	g
chr1	22339435	a	chr1	22316247	a
chr1	22339436	t	chr1	22316248	t
chr1	22339437	g	chr1	22316249	g
chr1	22339438	g	chr1	22316250	g
chr1	22339439	g	chr1	22316251	g
chr1	22339440	c	chr1	22316252	c
chr1	22339441	t	chr1	22316253	t
chr1	22339442	g	chr1	22316254	g
chr1	22339443	g	chr1	22316255	g
chr1	22339444	g	chr1	22316256	g
chr1	22339445	g	chr1	22316257	g
chr1	22339446	g	chr1	22316258	g
chr1	22339447	c	chr1	22316259	c
chr1	22339448	t	chr1	22316260	t
chr1	22339449	t	chr1	22316261	t
chr1	22339450	t	chr1	22316262	t
chr1	22339451	g	chr1	22316263	g
chr1	22339452	g	chr1	22316264	g
chr1	22339452	-	chr1	22316265	t
chr1	22339453	t	chr1	22316266	t
chr1	22339454	a	chr1	22316267	a
chr1	22339455	t	chr1	22316268	t
chr1	22339456	t	chr1	22316269	t
chr1	22339457	c	chr1	22316270	c
chr1	22339458	g	chr1	22316271	a
chr1	22339459	t	chr1	22316272	t
chr1	22339460	c	chr1	22316273	t
chr1	22339461	c	chr1	22316274	c
chr1	22339462	a	chr1	22316275	a
chr1	22339463	t	chr1	22316276	t
chr1	22339464	t	chr1	22316277	t
chr1	22339465	c	chr1	22316278	c
chr1	22339466	a	chr1	22316279	a
chr1	22339467	a	chr1	22316280	a
chr1	22339468	c	chr1	22316281	c
chr1	22339469	a	chr1	22316282	a
chr1	22339470	a	chr1	22316283	a
chr1	22339471	a	chr1	22316284	a
chr1	22339472	c	chr1	22316285	c
chr1	22339473	a	chr1	22316286	a
chr1	22339474	c	chr1	22316287	c
chr1	22339475	t	chr1	22316288	t
chr1	22339476	t	chr1	22316289	t
chr1	22339477	a	chr1	22316290	a
chr1	22339478	t	chr1	22316291	t
chr1	22339479	t	chr1	22316292	t
chr1	22339480	c	chr1	22316293	c
chr1	22339481	c	chr1	22316294	c
chr1	22339482	t	chr1	22316295	t
chr1	22339483	t	chr1	22316296	t
chr1	22339484	g	chr1	22316297	g
chr1	22339485	t	chr1	22316298	t
chr1	22339486	t	chr1	22316299	t
chr1	22339487	t	chr1	22316300	t
chr1	22339488	t	chr1	22316301	t
chr1	22339489	a	chr1	22316302	a
chr1	22339490	g	chr1	22316303	a
chr1	22339491	a	chr1	22316304	a
chr1	22339492	g	chr1	22316305	g
chr1	22339493	g	chr1	22316306	g
chr1	22339494	a	chr1	22316307	a
chr1	22339495	g	chr1	22316308	g
chr1	22339496	g	chr1	22316309	g
chr1	22339497	g	chr1	22316310	g
chr1	22339498	c	chr1	22316311	c
chr1	22339499	t	chr1	22316312	t
chr1	22339500	c	chr1	22316313	c
chr1	22339501	a	chr1	22316314	a
chr1	22339502	g	chr1	22316315	g
chr1	22339503	a	chr1	22316316	a
chr1	22339504	g	chr1	22316317	g
chr1	22339505	g	chr1	22316318	g
chr1	22339506	g	chr1	22316319	g
chr1	22339507	g	chr1	22316320	g
chr1	22339508	t	chr1	22316321	t
chr1	22339509	a	chr1	22316322	a
chr1	22339510	a	chr1	22316323	a
chr1	22339511	g	chr1	22316324	g
chr1	22339512	g	chr1	22316325	g
chr1	22339513	a	chr1	22316326	a
chr1	22339514	g	chr1	22316327	g
chr1	22339515	a	chr1	22316328	a
chr1	22339516	c	chr1	22316329	c
chr1	22339517	a	chr1	22316330	a
chr1	22339518	t	chr1	22316331	t
chr1	22339519	g	chr1	22316332	g
chr1	22339520	g	chr1	22316333	g
chr1	22339521	t	chr1	22316334	t
chr1	22339522	t	chr1	22316335	t
chr1	22339523	c	chr1	22316336	c
chr1	22339524	c	chr1	22316337	c
chr1	22339525	t	chr1	22316338	t
chr1	22339526	g	chr1	22316339	g
chr1	22339527	c	chr1	22316340	c
chr1	22339528	c	chr1	22316341	c
chr1	22339529	c	chr1	22316342	c
chr1	22339530	t	chr1	22316343	t
chr1	22339531	g	chr1	22316344	g
chr1	22339532	a	chr1	22316345	a
chr1	22339533	a	chr1	22316346	a
chr1	22339534	g	chr1	22316347	g
chr1	22339535	t	chr1	22316348	t
chr1	22339536	g	chr1	22316349	g
chr1	22339537	g	chr1	22316350	a
chr1	22339538	c	chr1	22316351	c
chr1	22339539	t	chr1	22316352	t
chr1	22339540	c	chr1	22316353	c
chr1	22339541	a	chr1	22316354	a
chr1	22339542	t	chr1	22316355	t
chr1	22339543	t	chr1	22316356	t
chr1	22339544	a	chr1	22316357	a
chr1	22339545	t	chr1	22316358	t
chr1	22339546	t	chr1	22316359	t
chr1	22339547	t	chr1	22316360	t
chr1	22339548	a	chr1	22316361	a
chr1	22339549	a	chr1	22316362	a
chr1	22339550	a	chr1	22316363	a
chr1	22339551	g	chr1	22316364	g
chr1	22339552	a	chr1	22316365	a
chr1	22339553	t	chr1	22316366	t
chr1	22339554	a	chr1	22316367	a
chr1	22339555	g	chr1	22316368	g
chr1	22339556	c	chr1	22316369	c
chr1	22339557	t	chr1	22316370	t
chr1	22339558	c	chr1	22316371	c
chr1	22339559	t	chr1	22316372	t
chr1	22339560	c	chr1	22316373	c
chr1	22339561	t	chr1	22316374	t
chr1	22339562	t	chr1	22316375	t
chr1	22339563	a	chr1	22316376	a
chr1	22339564	g	chr1	22316377	g
chr1	22339565	t	chr1	22316378	t
chr1	22339566	c	chr1	22316379	c
chr1	22339567	t	chr1	22316380	t
chr1	22339568	g	chr1	22316381	g
chr1	22339569	t	chr1	22316382	t
chr1	22339570	g	chr1	22316383	g
chr1	22339571	t	chr1	22316384	t
chr1	22339572	t	chr1	22316385	t
chr1	22339573	c	chr1	22316386	c
chr1	22339574	a	chr1	22316387	a
chr1	22339575	t	chr1	22316388	t
chr1	22339576	a	chr1	22316389	a
chr1	22339577	c	chr1	22316390	c
chr1	22339578	t	chr1	22316391	t
chr1	22339579	g	chr1	22316392	g
chr1	22339580	c	chr1	22316393	c
chr1	22339581	t	chr1	22316394	t
chr1	22339582	a	chr1	22316395	a
chr1	22339583	t	chr1	22316396	t
chr1	22339584	a	chr1	22316397	a
chr1	22339585	a	chr1	22316398	a
chr1	22339586	a	chr1	22316399	a
chr1	22339587	g	chr1	22316400	g
chr1	22339588	a	chr1	22316401	a
chr1	22339589	a	chr1	22316402	a
chr1	22339590	c	chr1	22316403	c
chr1	22339591	t	chr1	22316404	t
chr1	22339592	g	chr1	22316405	g
chr1	22339593	c	chr1	22316406	c
chr1	22339594	c	chr1	22316407	c
chr1	22339595	c	chr1	22316408	c
chr1	22339596	g	chr1	22316409	g
chr1	22339597	a	chr1	22316410	a
chr1	22339598	g	chr1	22316411	g
chr1	22339599	a	chr1	22316412	a
chr1	22339600	c	chr1	22316413	c
chr1	22339601	t	chr1	22316414	t
chr1	22339602	g	chr1	22316415	g
chr1	22339603	g	chr1	22316416	g
chr1	22339604	g	chr1	22316417	g
chr1	22339605	t	chr1	22316418	t
chr1	22339606	a	chr1	22316419	a
chr1	22339607	g	chr1	22316420	g
chr1	22339608	t	chr1	22316421	t
chr1	22339609	t	chr1	22316422	t
chr1	22339610	t	chr1	22316423	t
chr1	22339611	a	chr1	22316424	a
chr1	22339612	t	chr1	22316425	t
chr1	22339613	a	chr1	22316426	a
chr1	22339613	-	chr1	22316427	a
chr1	22339613	-	chr1	22316428	a
chr1	22339613	-	chr1	22316429	g
