# Supplementary material for: Systematic analysis of paralogous regions in 41,755 exomes uncovers clinically relevant variation
Source: Research Square preprint supplement (doi:10.21203/rs.3.rs-2302399/v1), 2022-11-29
Supplement: Supplementary file 12 [file STable2.xlsx]

## Sheet: STable2
Recurrence	Chrom	Start	End
1	chr1	1413783	1416350
289	chr1	1416224	1416350
1	chr1	1570578	1592144
1	chr1	1633797	1647254
4	chr1	1633797	1657433
1	chr1	1633797	1635384
1	chr1	1633797	1654856
39	chr1	1653649	1657433
10	chr1	1653649	1654856
22	chr1	1656282	1657433
3	chr1	1669261	1671591
1	chr1	21808078	21808305
3	chr1	22328577	22339613
3	chr1	22328577	22329718
4	chr1	22328577	22337252
1839	chr1	22338347	22339613
1	chr1	25715025	25716183
38	chr1	39980428	39982362
9	chr1	40235173	40237127
1	chr1	48791163	48791525
1	chr1	48791524	48791687
15	chr1	108771010	108772174
4	chr1	109009494	109010775
1	chr1	109012810	109013888
1	chr1	147410255	147411562
8	chr1	159014494	159019916
2	chr1	161598943	161600257
2	chr1	176131994	176132134
264	chr1	196758598	196800336
15	chr1	196758598	196759972
30	chr1	196799146	196800336
1	chr1	248651323	248653528
98	chr1	248721152	248723357
2	chr1	248721152	248738562
12	chr1	248812947	248814673
795	chr10	48028650	48029888
32	chr10	51973937	51975180
1	chr10	56359738	56360643
8	chr11	18267212	18267897
24	chr11	63010884	63011203
5	chr11	63010884	63011066
2	chr11	89530783	89532312
8	chr11	89533443	89534765
771	chr11	89771251	89772572
2	chr11	89771251	89775232
3	chr11	89773644	89775232
22	chr12	11505075	11549097
5	chr12	11505075	11547187
4	chr12	27650993	27651168
65	chr13	24465145	24466738
1	chr13	51952369	51961688
1	chr13	51957463	51961688
1	chr13	51957715	51961688
1	chr13	51961511	52004531
3	chr13	52004421	52004531
3	chr14	24437431	24475728
4	chr14	24469402	24471342
1	chr14	36190884	36191067
1	chr14	36219679	36219907
43	chr14	74009245	74010909
8	chr15	22382400	22383065
1	chr15	32911721	32912948
2	chr15	43890861	43905704
6	chr15	43890861	43940464
7	chr15	43890861	43897797
5	chr15	43890861	43901732
3	chr15	43895239	43901732
1	chr15	43895239	43897797
2	chr15	43897261	43897797
16	chr15	43899860	43901732
5	chr15	43899860	43900601
7	chr15	43901273	43901732
22	chr15	43902916	43905704
1	chr15	43927357	43993767
3	chr15	43990685	43993767
4	chr15	44741089	44741243
1	chr15	44741089	44741434
2	chr15	45364994	45366216
8	chr16	222411	223930
1	chr16	2606817	2608411
47	chr16	2626792	2628019
19	chr16	16356373	16357494
1	chr16	18542358	18543483
1	chr16	20450921	20451949
3	chr16	21747381	21747911
194	chr16	21764147	21764645
931	chr16	28400917	28404059
1	chr16	55855079	55855633
1	chr16	70210617	70211916
18	chr16	70888465	70889617
1	chr16	70888465	70938492
27	chr16	70936970	70938492
1	chr16	71061021	71066362
2	chr16	71061021	71062356
13	chr16	74451433	74452708
1	chr17	14139204	14140532
1	chr17	29103114	29103620
1	chr17	39394135	39395466
1	chr17	39521294	39521882
2358	chr17	57656632	57657440
2	chr17	57656632	57677044
1	chr17	57663313	57665614
1	chr17	66265036	66265687
1	chr18	29776486	29776582
1	chr18	48444469	48452268
1	chr18	48444469	48444591
1	chr18	48452114	48452268
10	chr19	35861599	35863887
1352	chr19	40373452	40390400
1	chr19	43258145	43259297
2	chr19	43371912	43529455
4	chr19	43859612	43860460
230	chr19	52132493	52150348
2	chr19	54723985	54744821
1876	chr19	55314473	55318389
5	chr2	96259323	96262626
38	chr2	96261525	96262626
9	chr2	96261525	96698118
1771	chr2	96697933	96698118
1	chr2	110332149	110332356
198	chr2	241631260	241632517
20	chr21	39610478	39610589
158	chr22	39357103	39387954
59	chr22	42950427	42953183
32	chr3	10090857	10091389
78	chr3	75785403	75789040
348	chr3	75785403	75791554
121	chr3	75790026	75791554
1	chr3	123693630	123695141
1	chr3	133878070	133894562
1	chr3	133894442	133894562
1	chr3	133930344	133930463
1	chr4	68379782	68380418
1	chr4	68396524	68396644
1	chr4	69519525	69520147
2516	chr4	75481491	75482751
1	chr4	84398669	84398890
4	chr4	99943848	99944036
1	chr4	186185586	186185772
1	chr5	711742	767527
146	chr5	741034	742303
7	chr5	741034	745875
1	chr5	767330	796988
26	chr5	833215	834482
306	chr5	68830320	68830866
32	chr5	68830320	69373507
802	chr5	69372181	69373507
6	chr5	70247601	70248925
7	chr5	90327211	90327347
1	chr5	176692793	176693050
1	chr5	176692935	176693050
1	chr5	177150614	177180680
1	chr5	177165695	177168936
1	chr5	177179473	177180680
1	chr5	177457120	177458319
4	chr6	31958347	31967991
50	chr6	31973323	31980589
90	chr6	31973323	31975068
10	chr6	31975337	31980589
25	chr6	31991086	32000726
1	chr6	32006057	32007807
2	chr6	32489764	32489842
1	chr6	32551968	32552046
3	chr6	133019917	133020407
6	chr6	166999430	166999790
1	chr6	167586628	167588071
1	chr6	167586628	167591226
5	chr6	167589930	167591226
2	chr7	5770145	5770648
155	chr7	5944221	5945557
2	chr7	5944221	5950283
4	chr7	5944221	5953119
1	chr7	5944221	6018627
2	chr7	5944221	5964227
1	chr7	5949103	5953119
717	chr7	5962397	5964227
15	chr7	5962397	5985472
4	chr7	5962397	6018627
1	chr7	5962397	5968465
1	chr7	5967287	5968465
3	chr7	5982374	5985472
132	chr7	6016919	6018627
6	chr7	6016919	6017546
1	chr7	6018044	6018627
96	chr7	6803025	6804279
281	chr7	6804670	6807083
10	chr7	6804670	6855032
21	chr7	6804670	6860075
3	chr7	6804670	6846380
1	chr7	6825000	6827241
3	chr7	6844075	6846380
25	chr7	6851048	6860075
4	chr7	6851048	6853302
1	chr7	6851048	6855032
40	chr7	6853879	6860075
11	chr7	6853879	6855032
19	chr7	6858737	6860075
1	chr7	34790104	34790403
1	chr7	34790104	35943402
1	chr7	34790104	34791500
1	chr7	34790232	35943402
11	chr7	72429903	72432673
336	chr7	74524067	74525432
7	chr7	75032230	75034999
2	chr7	76238675	76240046
1	chr7	76238675	76241526
7	chr7	76240341	76241526
1	chr7	96324100	96324213
1	chr7	104800950	104801066
191	chr7	141762100	141796686
3	chr7	141766564	141796686
170	chr8	7307585	7308928
26	chr8	7396622	7400122
78	chr8	7685679	7687117
1	chr8	7717660	7719002
48	chr8	7719139	7721599
3	chr9	5338620	5340029
10	chr9	80430521	80430696
425	chr9	84545162	84547705
740	chr9	84545162	84547446
72	chr9	84547505	84547705
200	chr9	84560253	84562537
2	chr9	84560253	84562800
1	chrX	2748029	2761595
1	chrX	7175178	7175592
4	chrX	46480395	46480505
1	chrX	46480395	46508242
1	chrX	55116384	55117481
2	chrX	64947663	64957209
2	chrX	64947663	64958487
2	chrX	64949291	64949582
1	chrX	64956651	64956792
1	chrX	148584519	148607784
9	chrX	148630348	148631479
23	chrX	149097780	149098909
