# Supplementary material for: Systematic analysis of paralogous regions in 41,755 exomes uncovers clinically relevant variation
Source: Research Square preprint supplement (doi:10.21203/rs.3.rs-2302399/v1), 2022-11-29
Supplement: Supplementary file 14 [file STable21.xlsx]

## Sheet: STable21
Chrom	Start	End
chr1	64367	67000
chr1	564133	566152
chr1	877477	877637
chr1	878621	878761
chr1	879064	879195
chr1	879274	879447
chr1	879464	879565
chr1	895380	895550
chr1	1342278	1342382
chr1	1390564	1392780
chr1	1393448	1395643
chr1	1413283	1415304
chr1	1415724	1416850
chr1	1420888	1423082
chr1	1425442	1426615
chr1	1451942	1453972
chr1	1453780	1454902
chr1	1458712	1460762
chr1	1460748	1462941
chr1	1464101	1465275
chr1	1566995	1571004
chr1	1570078	1572677
chr1	1572210	1575012
chr1	1574694	1578952
chr1	1579438	1584523
chr1	1587826	1590035
chr1	1590489	1592644
chr1	1598707	1600963
chr1	1605902	1609233
chr1	1630217	1634228
chr1	1633297	1635884
chr1	1635426	1638231
chr1	1637907	1642158
chr1	1642658	1647754
chr1	1653149	1655356
chr1	1655782	1657933
chr1	1665070	1667330
chr1	1668761	1672091
chr1	3544053	3544167
chr1	3545063	3545200
chr1	3800606	3800720
chr1	3800827	3801194
chr1	6487710	6496076
chr1	6496098	6497024
chr1	6497076	6498308
chr1	6498524	6500615
chr1	6500616	6502646
chr1	6502920	6507236
chr1	6507292	6515417
chr1	6515426	6519470
chr1	9639615	9640773
chr1	9840958	9841057
chr1	9841624	9841772
chr1	10033509	10033788
chr1	10460438	10460638
chr1	10464207	10464345
chr1	10471463	10471617
chr1	10473106	10473317
chr1	10477032	10477186
chr1	10477423	10477574
chr1	10478871	10478988
chr1	10479460	10479604
chr1	10479674	10479890
chr1	10479903	10480213
chr1	11083272	11083430
chr1	11766338	11766662
chr1	11769322	11769529
chr1	11771897	11772030
chr1	11779638	11779895
chr1	11779955	11780295
chr1	11780663	11780992
chr1	11982359	11983529
chr1	11984927	11986089
chr1	12855102	12856204
chr1	12906450	12909267
chr1	12976556	12979801
chr1	12979214	12981289
chr1	13034912	13036565
chr1	13036931	13038809
chr1	13139819	13141468
chr1	13142139	13143286
chr1	13162572	13163836
chr1	13182480	13184994
chr1	13197876	13199140
chr1	13218396	13219557
chr1	13328403	13330284
chr1	13330648	13332298
chr1	13385896	13388226
chr1	13387353	13390655
chr1	13447921	13449222
chr1	13448704	13450705
chr1	13449734	13451580
chr1	13474317	13476142
chr1	13475474	13477320
chr1	13476495	13478235
chr1	13521045	13523120
chr1	13522757	13525341
chr1	13525200	13527934
chr1	13606679	13609013
chr1	13608139	13611440
chr1	13668776	13670080
chr1	13669561	13671564
chr1	13670587	13672438
chr1	13695141	13696979
chr1	13696309	13698159
chr1	13697331	13699070
chr1	13741875	13743984
chr1	13743612	13746209
chr1	13746059	13748796
chr1	13881812	13881949
chr1	15789405	15790544
chr1	15809284	15810419
chr1	16567654	16567800
chr1	16567864	16567968
chr1	16805618	16805723
chr1	16806223	16806367
chr1	16806706	16807193
chr1	16807474	16808110
chr1	16808423	16808571
chr1	16808622	16809650
chr1	16819330	16819501
chr1	16819674	16819787
chr1	16820043	16820627
chr1	16820650	16820888
chr1	16821328	16821428
chr1	16904596	16906882
chr1	16910891	16913183
chr1	16952963	16953218
chr1	16960938	16961249
chr1	16961339	16961544
chr1	16961912	16962105
chr1	16971115	16971908
chr1	16971912	16976782
chr1	16972120	16973186
chr1	16973224	16973420
chr1	16973430	16973567
chr1	16973583	16974214
chr1	16974227	16974327
chr1	16974342	16974496
chr1	16974506	16974964
chr1	16974986	16975153
chr1	16975165	16975547
chr1	16975563	16976797
chr1	16976809	16976990
chr1	16977004	16977117
chr1	16977201	16977411
chr1	16977479	16977621
chr1	16977645	16977784
chr1	16977798	16977970
chr1	16977993	16978094
chr1	16978128	16978390
chr1	16978580	16979204
chr1	16979215	16979441
chr1	16979533	16980093
chr1	16980240	16980416
chr1	16980779	16980928
chr1	16981619	16981785
chr1	16981880	16981994
chr1	16998493	17001151
chr1	17015546	17018959
chr1	17018962	17019627
chr1	17019636	17020539
chr1	17020540	17026120
chr1	17026244	17028087
chr1	17028091	17028680
chr1	17028684	17036374
chr1	17036420	17036895
chr1	17036896	17045229
chr1	17045564	17047222
chr1	17059299	17061961
chr1	17065768	17066153
chr1	17065774	17066153
chr1	17066167	17068429
chr1	17066167	17068429
chr1	17068587	17071451
chr1	17068587	17071451
chr1	17071896	17072062
chr1	17071896	17072062
chr1	17072107	17072238
chr1	17072107	17072238
chr1	17072294	17072442
chr1	17072294	17072442
chr1	17072454	17072606
chr1	17072454	17072606
chr1	17072692	17072801
chr1	17072692	17072801
chr1	17073036	17073164
chr1	17073036	17073164
chr1	17073350	17073468
chr1	17073350	17073468
chr1	17073483	17073621
chr1	17073483	17073621
chr1	17073754	17073914
chr1	17073754	17073914
chr1	17073928	17074180
chr1	17073928	17074180
chr1	17074198	17074300
chr1	17074198	17074300
chr1	17074387	17074568
chr1	17074387	17074568
chr1	17074733	17074835
chr1	17074733	17074835
chr1	17074918	17075123
chr1	17074918	17075123
chr1	17078463	17078577
chr1	17078672	17078838
chr1	17079529	17079678
chr1	17080041	17080215
chr1	17080362	17080922
chr1	17081014	17081241
chr1	17081252	17081876
chr1	17082066	17082328
chr1	17082362	17082462
chr1	17082485	17082657
chr1	17082671	17082811
chr1	17082835	17082977
chr1	17083045	17083255
chr1	17083339	17083452
chr1	17083466	17083647
chr1	17083659	17084893
chr1	17084909	17085291
chr1	17085303	17085470
chr1	17085492	17085950
chr1	17085960	17086117
chr1	17086132	17086232
chr1	17086245	17086876
chr1	17086892	17087029
chr1	17087039	17087235
chr1	17087273	17088361
chr1	17194081	17196313
chr1	17244925	17245025
chr1	17245465	17245703
chr1	17245726	17246310
chr1	17246556	17246653
chr1	17246660	17246822
chr1	17260803	17261001
chr1	17261102	17261325
chr1	17261425	17261730
chr1	17266717	17267725
chr1	17267776	17267924
chr1	17268238	17269295
chr1	17269471	17269605
chr1	17269770	17269877
chr1	17272528	17272784
chr1	19630646	19630895
chr1	19632506	19632652
chr1	19633486	19633591
chr1	19633798	19633917
chr1	19634644	19634768
chr1	21752176	21753407
chr1	21754484	21757029
chr1	21807578	21808805
chr1	22303452	22305592
chr1	22312357	22314578
chr1	22314658	22316929
chr1	22328077	22330218
chr1	22335531	22337752
chr1	22337847	22340113
chr1	23637075	23637362
chr1	23637717	23637827
chr1	24172553	24172674
chr1	24175150	24175251
chr1	24189615	24189767
chr1	24227536	24227841
chr1	24227867	24229213
chr1	24229291	24229686
chr1	24275010	24276076
chr1	24286299	24286498
chr1	24287408	24287632
chr1	24287917	24289375
chr1	24293269	24295356
chr1	24297545	24297653
chr1	24297655	24297801
chr1	24300411	24302736
chr1	24304177	24306432
chr1	24305610	24307988
chr1	24998872	24999137
chr1	24999172	24999342
chr1	24999521	24999760
chr1	25082587	25082694
chr1	25141866	25141971
chr1	25167630	25167898
chr1	25169669	25170052
chr1	25170154	25170373
chr1	25628731	25630891
chr1	25642366	25644535
chr1	25654822	25655998
chr1	25688432	25689610
chr1	25700865	25703052
chr1	25714525	25716683
chr1	26226768	26226866
chr1	26753764	26753947
chr1	28013343	28013457
chr1	28165191	28165373
chr1	28167515	28167638
chr1	28167645	28167755
chr1	28169687	28169847
chr1	28176591	28176771
chr1	28176773	28177085
chr1	28421640	28422933
chr1	28527063	28527893
chr1	28531760	28531871
chr1	28536471	28536588
chr1	28547558	28547797
chr1	28919003	28919263
chr1	28920192	28921638
chr1	29069236	29070506
chr1	29095428	29096297
chr1	31567494	31567917
chr1	31653788	31653893
chr1	31838604	31838694
chr1	31842223	31842415
chr1	32385164	32385269
chr1	32391068	32391234
chr1	32395649	32395873
chr1	32403578	32403691
chr1	32694087	32694188
chr1	32696512	32696628
chr1	32796359	32796516
chr1	32797063	32797189
chr1	32797266	32797377
chr1	33086610	33086714
chr1	33087093	33087337
chr1	33146148	33146261
chr1	33487185	33487314
chr1	33490033	33490180
chr1	33502328	33502453
chr1	35321098	35321215
chr1	35586621	35586866
chr1	35587184	35588088
chr1	35588092	35588713
chr1	36748118	36748309
chr1	36751956	36752879
chr1	36754649	36755374
chr1	36756963	36757155
chr1	36758186	36758318
chr1	36762240	36762381
chr1	36766479	36766695
chr1	36767146	36767303
chr1	36769386	36769741
chr1	36769761	36770614
chr1	37958910	37959718
chr1	37967403	37967608
chr1	37975045	37975148
chr1	38032467	38032568
chr1	38034445	38034546
chr1	38040254	38040400
chr1	38042050	38042169
chr1	38047815	38047931
chr1	38052915	38053106
chr1	38056298	38056457
chr1	38268615	38268735
chr1	38423404	38423540
chr1	39975791	39978708
chr1	39979626	39983162
chr1	39985773	39988165
chr1	40229371	40231765
chr1	40234365	40237938
chr1	40238840	40241764
chr1	40524999	40525137
chr1	40525726	40525854
chr1	40529886	40530051
chr1	40531876	40532000
chr1	40533200	40533310
chr1	40535350	40535484
chr1	40535819	40535961
chr1	40536494	40536661
chr1	40537111	40537436
chr1	40537450	40537944
chr1	40537945	40538256
chr1	42506214	42506313
chr1	42506394	42506583
chr1	42506683	42506790
chr1	42506943	42507063
chr1	42507079	42507183
chr1	42507425	42507548
chr1	42507862	42508390
chr1	43130523	43130635
chr1	43133009	43133122
chr1	43368998	43369111
chr1	43369334	43369432
chr1	43369516	43370091
chr1	43824826	43825076
chr1	43825149	43825317
chr1	43825383	43825501
chr1	43825628	43825778
chr1	43825853	43826068
chr1	43826157	43826269
chr1	43826388	43826637
chr1	43826778	43826923
chr1	43827852	43827991
chr1	43828609	43828859
chr1	44315093	44315874
chr1	44315894	44316602
chr1	44316667	44316769
chr1	44316894	44317426
chr1	44595010	44595174
chr1	44595175	44595394
chr1	44595458	44595875
chr1	44596199	44596435
chr1	44598909	44599920
chr1	45482057	45482882
chr1	45508931	45509081
chr1	45516739	45516935
chr1	45524309	45524443
chr1	45525762	45525929
chr1	45553545	45553722
chr1	45976721	45977098
chr1	45980170	45980322
chr1	45980537	45980678
chr1	45981319	45981484
chr1	45984598	45984737
chr1	46864214	46864331
chr1	46864368	46864504
chr1	46872434	46872535
chr1	46909168	46909295
chr1	46909489	46909626
chr1	46928654	46928752
chr1	47170734	47171373
chr1	47173570	47173733
chr1	47181956	47182125
chr1	47183564	47183899
chr1	47183906	47184224
chr1	47184228	47184476
chr1	47347453	47349996
chr1	47351730	47354181
chr1	47398689	47402370
chr1	47545080	47547529
chr1	47549254	47551807
chr1	47607908	47611569
chr1	48790631	48790933
chr1	48790935	48791098
chr1	48791163	48791404
chr1	48791411	48791687
chr1	51735688	51735805
chr1	51736867	51737253
chr1	51820898	51821378
chr1	51821444	51821824
chr1	51951508	51951613
chr1	52075623	52075723
chr1	52253711	52253810
chr1	52719402	52719937
chr1	52734181	52734312
chr1	52740123	52740264
chr1	52744155	52744296
chr1	52747322	52747495
chr1	52759112	52759359
chr1	52769482	52769605
chr1	53237808	53238191
chr1	54670689	54670800
chr1	54678210	54678340
chr1	55181557	55181700
chr1	55182260	55182394
chr1	55183151	55183335
chr1	55188335	55188480
chr1	55197146	55197381
chr1	55207070	55207988
chr1	55560210	55560310
chr1	55562410	55562512
chr1	55562797	55562898
chr1	62504603	62505067
chr1	62655997	62656137
chr1	65692865	65693022
chr1	65693039	65693164
chr1	70385081	70386008
chr1	71126344	71126760
chr1	71126780	71126895
chr1	76208107	76209405
chr1	76209562	76209795
chr1	76209868	76210134
chr1	78312448	78312545
chr1	78312960	78313203
chr1	78313216	78315144
chr1	78315155	78315315
chr1	82187710	82187820
chr1	89518020	89519099
chr1	89519121	89519805
chr1	89520144	89522885
chr1	89522941	89523290
chr1	89524594	89531361
chr1	89872822	89875043
chr1	89875645	89877270
chr1	89884162	89885134
chr1	89885155	89887464
chr1	89887494	89890230
chr1	89890280	89890835
chr1	89891577	89891718
chr1	89891740	89892802
chr1	91358136	91358554
chr1	91358721	91358888
chr1	91358936	91359569
chr1	91793912	91795819
chr1	92439523	92439647
chr1	92459684	92459818
chr1	92467592	92467714
chr1	92469958	92470183
chr1	92470663	92470823
chr1	92479754	92479988
chr1	92590943	92591135
chr1	92591435	92591566
chr1	92591647	92591770
chr1	92591903	92592113
chr1	92592202	92592670
chr1	92592697	92592913
chr1	92769521	92769642
chr1	92788991	92789692
chr1	92789703	92790011
chr1	95362765	95362934
chr1	95362946	95363287
chr1	95363303	95363407
chr1	95363453	95363653
chr1	95364920	95365083
chr1	95367684	95367822
chr1	96883910	96884005
chr1	96884143	96884389
chr1	96884547	96885489
chr1	100678836	100679506
chr1	100680080	100680179
chr1	101338491	101339924
chr1	104160731	104163236
chr1	104162432	104164227
chr1	104163353	104165393
chr1	104199625	104202043
chr1	104202475	104204045
chr1	104233138	104235004
chr1	104235172	104237590
chr1	104256634	104258432
chr1	104257478	104259516
chr1	104293765	104296180
chr1	104296340	104298210
chr1	105976623	105976733
chr1	105976920	105977088
chr1	106240724	106240826
chr1	108682395	108682526
chr1	108765185	108767296
chr1	108768312	108770583
chr1	108770501	108772684
chr1	108774510	108779172
chr1	108778776	108781006
chr1	108781267	108783583
chr1	108866101	108866233
chr1	108921543	108923859
chr1	108924117	108926350
chr1	108996008	108998319
chr1	108998579	109000813
chr1	109000408	109005074
chr1	109006787	109009085
chr1	109008994	109011275
chr1	109012310	109014388
chr1	109606487	109606591
chr1	110213898	110214012
chr1	110214100	110214213
chr1	110217359	110217492
chr1	110223295	110225619
chr1	110235938	110236377
chr1	110241740	110244063
chr1	110257558	110257672
chr1	110259946	110260470
chr1	110943870	110944215
chr1	110946531	110946668
chr1	111550397	111550695
chr1	111553234	111553358
chr1	111825464	111826604
chr1	111844349	111844484
chr1	111860163	111861304
chr1	111905126	111905255
chr1	111928700	111928840
chr1	112246954	112247116
chr1	112251758	112251893
chr1	112255041	112255244
chr1	112255254	112255454
chr1	112255457	112255736
chr1	113455871	113455988
chr1	113456200	113456317
chr1	113456339	113456504
chr1	113460534	113460678
chr1	113464650	113464750
chr1	113466369	113466573
chr1	113466578	113467028
chr1	113471705	113471864
chr1	115110990	115111089
chr1	117150276	117151387
chr1	117282029	117282741
chr1	117282772	117284361
chr1	117910782	117911085
chr1	117944878	117945019
chr1	117957321	117957462
chr1	118003138	118003242
chr1	118008947	118009055
chr1	118039428	118039607
chr1	118041993	118042183
chr1	118045465	118045569
chr1	118065430	118065632
chr1	118065875	118065990
chr1	118066086	118066191
chr1	118091708	118091840
chr1	118092801	118093050
chr1	118319708	118321532
chr1	120427925	120428136
chr1	120428578	120429031
chr1	120429443	120429624
chr1	120507992	120508189
chr1	120510743	120511216
chr1	120515368	120515598
chr1	120547058	120549380
chr1	120571289	120573749
chr1	120610455	120612731
chr1	120903673	120906090
chr1	120929066	120931211
chr1	121114760	121117137
chr1	121123445	121125830
chr1	121127178	121130789
chr1	121244205	121244335
chr1	121244367	121244500
chr1	121244508	121244608
chr1	121244619	121244960
chr1	121244968	121245721
chr1	121259908	121272517
chr1	121272787	121273827
chr1	121280217	121280617
chr1	121281799	121282631
chr1	121282637	121283821
chr1	121283824	121296622
chr1	121296828	121300077
chr1	121300088	121302481
chr1	121302674	121311742
chr1	121311747	121314710
chr1	144156219	144157796
chr1	144675863	144678600
chr1	144678807	144681173
chr1	144951071	144953923
chr1	144954131	144956497
chr1	145138024	145139228
chr1	145139361	145139957
chr1	145208694	145210976
chr1	145247671	145250132
chr1	145272015	145274339
chr1	145309125	145310776
chr1	145508916	145509062
chr1	145509155	145511455
chr1	145748056	145765084
chr1	145787741	145789869
chr1	145810308	145813082
chr1	145815552	145817813
chr1	145898244	145900561
chr1	146052673	146053825
chr1	146056300	146058462
chr1	146309480	146311756
chr1	146313855	146316187
chr1	146315406	146318825
chr1	146319991	146322088
chr1	146321204	146324613
chr1	146333075	146335009
chr1	146394321	146396501
chr1	146650054	146650268
chr1	146650293	146650411
chr1	146650532	146650711
chr1	146650719	146650827
chr1	146651094	146651235
chr1	146651249	146651530
chr1	146674060	146674176
chr1	146674922	146675055
chr1	146675303	146675420
chr1	146675575	146675891
chr1	146675952	146676283
chr1	146676363	146676456
chr1	147409755	147412062
chr1	147414471	147417242
chr1	147439937	147442261
chr1	147465093	147482096
chr1	147594459	147595614
chr1	148193219	148194344
chr1	148329451	148331042
chr1	148587012	148588675
chr1	148749056	148750721
chr1	148863855	148863957
chr1	148900973	148901339
chr1	149289718	149292150
chr1	149675260	149677689
chr1	149759000	149761144
chr1	149783825	149786236
chr1	149803078	149805722
chr1	149811140	149816037
chr1	149820907	149825807
chr1	149831223	149833865
chr1	150469273	150469392
chr1	150479481	150479590
chr1	150595032	150595196
chr1	151234625	151234734
chr1	151236379	151236514
chr1	151237857	151238096
chr1	151238491	151238599
chr1	151239636	151239942
chr1	151732264	151732429
chr1	151732477	151732668
chr1	151733916	151734039
chr1	151734842	151734952
chr1	152083924	152085055
chr1	152095529	152095627
chr1	152095824	152096086
chr1	152275204	152277479
chr1	152276656	152281365
chr1	152327310	152328545
chr1	152327766	152328994
chr1	152372195	152372669
chr1	153353086	153353188
chr1	153946778	153946877
chr1	154128570	154128681
chr1	154386776	154387363
chr1	154401795	154401895
chr1	154406987	154407087
chr1	154407484	154407589
chr1	154935285	154935573
chr1	154937601	154937753
chr1	154942501	154942692
chr1	155180145	155184499
chr1	155182611	155185768
chr1	155185985	155188001
chr1	155188033	155188947
chr1	155188948	155189080
chr1	155189148	155189454
chr1	155189532	155189646
chr1	155189648	155189796
chr1	155197093	155197286
chr1	155197287	155197430
chr1	155197494	155198065
chr1	155200743	155201230
chr1	155201244	155205116
chr1	155203242	155205552
chr1	155205587	155206446
chr1	155206939	155207421
chr1	155207721	155208754
chr1	155209368	155209927
chr1	155210261	155211185
chr1	155211186	155211311
chr1	155211362	155211665
chr1	155211676	155211782
chr1	155211784	155211940
chr1	155214217	155214411
chr1	155214412	155214554
chr1	155214665	155215230
chr1	155232647	155233202
chr1	155233731	155233843
chr1	155234426	155234577
chr1	155235642	155235755
chr1	155236509	155236696
chr1	155237793	155237925
chr1	155240601	155240778
chr1	155242983	155243170
chr1	155556007	155556137
chr1	155557247	155557337
chr1	155557729	155557837
chr1	155558008	155559674
chr1	155561100	155561458
chr1	155561465	155561681
chr1	155561709	155562292
chr1	155563056	155563156
chr1	155563210	155563421
chr1	155565576	155566141
chr1	155566162	155566396
chr1	155566426	155566853
chr1	155568570	155568876
chr1	155568883	155569305
chr1	155579007	155582933
chr1	155582757	155584092
chr1	155583313	155584689
chr1	155583980	155585128
chr1	155584791	155587127
chr1	155587777	155589656
chr1	155618907	155620012
chr1	155629277	155632264
chr1	155641547	155643277
chr1	155660866	155661009
chr1	155672464	155672564
chr1	155676616	155676734
chr1	155679884	155680021
chr1	155680310	155681878
chr1	155681930	155682280
chr1	155682287	155682513
chr1	155682541	155683133
chr1	155683315	155683412
chr1	155683462	155683664
chr1	155687502	155687898
chr1	155688561	155688748
chr1	155688769	155689003
chr1	155689648	155690071
chr1	155695683	155695898
chr1	155696386	155696488
chr1	155696495	155696938
chr1	155708017	155708135
chr1	155714585	155718515
chr1	155718623	155719955
chr1	155719179	155720552
chr1	155719845	155720988
chr1	155720984	155723322
chr1	155726782	155728662
chr1	155734099	155735195
chr1	155735102	155737151
chr1	155743990	155745719
chr1	156005765	156006531
chr1	156712241	156713259
chr1	156713438	156713646
chr1	157693687	157693791
chr1	158147411	158147501
chr1	159013994	159016281
chr1	159018130	159020416
chr1	159674982	159675125
chr1	159683502	159683646
chr1	159887892	159888653
chr1	159889053	159889178
chr1	159889442	159889636
chr1	159890110	159890337
chr1	160328292	160328429
chr1	160465842	160465984
chr1	160466025	160466216
chr1	161011431	161011617
chr1	161011893	161012017
chr1	161331647	161332819
chr1	161486675	161488953
chr1	161493392	161496768
chr1	161517087	161519398
chr1	161550076	161552643
chr1	161557030	161559401
chr1	161559941	161563216
chr1	161568329	161570610
chr1	161575023	161578400
chr1	161598443	161600757
chr1	161631880	161634446
chr1	161638861	161641236
chr1	161641772	161645047
chr1	161721398	161721502
chr1	161721693	161721825
chr1	161722045	161722223
chr1	161722592	161722693
chr1	162415305	162415496
chr1	162415537	162415679
chr1	162759505	162759879
chr1	162760095	162760782
chr1	162760792	162760984
chr1	162761000	162761884
chr1	162761897	162762069
chr1	162762094	162762229
chr1	162762255	162762365
chr1	162762389	162762510
chr1	162762532	162762683
chr1	162763193	162763313
chr1	162763464	162763867
chr1	162764277	162764394
chr1	162765259	162765516
chr1	162765533	162765656
chr1	162765810	162766128
chr1	162766465	162767589
chr1	162767705	162769531
chr1	162769725	162773218
chr1	162773324	162774055
chr1	162774112	162775182
chr1	162775280	162782085
chr1	167489022	167489119
chr1	167489320	167489549
chr1	167489592	167489705
chr1	167490289	167490482
chr1	167855216	167856752
chr1	167856857	167856977
chr1	167857824	167857969
chr1	167860206	167860320
chr1	167860347	167860455
chr1	167866977	167867168
chr1	167867556	167867705
chr1	167873514	167873614
chr1	168215630	168216238
chr1	169084670	169084803
chr1	169094107	169094286
chr1	169096451	169096602
chr1	169100516	169101817
chr1	170338042	170338550
chr1	170338612	170338745
chr1	170338753	170339253
chr1	171560815	171561871
chr1	172717390	172717532
chr1	172717602	172717767
chr1	172717792	172717917
chr1	172718002	172719311
chr1	174978502	174978639
chr1	175913990	175914318
chr1	175956069	175956250
chr1	175957414	175957558
chr1	175958487	175958627
chr1	175996699	175996836
chr1	176012839	176012968
chr1	176015311	176015473
chr1	176050332	176050435
chr1	176131994	176132134
chr1	178714999	178715147
chr1	179416061	179416921
chr1	179416981	179417452
chr1	179417524	179417716
chr1	182811668	182811820
chr1	182812416	182812574
chr1	182821356	182821486
chr1	182822437	182822552
chr1	182823153	182823319
chr1	182827228	182827380
chr1	182827673	182827784
chr1	182827856	182828039
chr1	182829117	182829323
chr1	182835563	182835728
chr1	182841461	182841636
chr1	182843979	182844096
chr1	182845174	182845407
chr1	182845570	182845684
chr1	182847145	182847316
chr1	182848372	182848553
chr1	182849619	182849753
chr1	182850388	182850567
chr1	182850641	182850790
chr1	182852262	182852511
chr1	182852642	182852779
chr1	182853736	182853957
chr1	182856206	182856859
chr1	185060684	185060880
chr1	185062181	185062404
chr1	185067193	185067483
chr1	185068910	185069104
chr1	185069321	185070058
chr1	187677681	187677837
chr1	196713964	196716154
chr1	196758098	196760472
chr1	196787744	196790154
chr1	196798646	196800836
chr1	196883003	196885378
chr1	196911780	196914192
chr1	198648423	198648522
chr1	201497612	201497726
chr1	202384901	202400792
chr1	202400793	202401246
chr1	202414812	202415334
chr1	202415383	202420260
chr1	202421729	202422109
chr1	202422136	202427253
chr1	202427516	202440937
chr1	202441283	202456668
chr1	202977758	202977874
chr1	202991485	202992846
chr1	205686791	205687146
chr1	205687228	205687379
chr1	205687435	205687617
chr1	205688647	205688811
chr1	205689655	205689787
chr1	205696823	205696943
chr1	205715162	205715273
chr1	206564977	206567350
chr1	206573667	206576050
chr1	206577426	206581031
chr1	207699188	207701524
chr1	207700931	207703404
chr1	207704419	207706819
chr1	207706461	207708823
chr1	207714434	207716668
chr1	207717741	207720081
chr1	207719487	207721959
chr1	207722972	207725377
chr1	207725036	207727385
chr1	207732992	207735228
chr1	207736339	207738600
chr1	207742112	207744475
chr1	207817674	207818309
chr1	207818560	207818768
chr1	207818864	207819941
chr1	207819950	207820080
chr1	207820240	207820557
chr1	207820750	207820875
chr1	207820935	207821474
chr1	207821539	207822727
chr1	207822742	207822882
chr1	207825370	207826307
chr1	207826384	207827069
chr1	207827185	207828853
chr1	207828914	207829294
chr1	207829600	207831314
chr1	207831328	207831742
chr1	207924438	207925075
chr1	207925539	207925743
chr1	207925829	207926901
chr1	207926910	207927040
chr1	207927193	207927522
chr1	207927722	207927858
chr1	207927898	207928423
chr1	207928473	207929659
chr1	207929674	207929813
chr1	207929846	207930769
chr1	207930846	207931539
chr1	207931643	207933293
chr1	207933354	207935448
chr1	207935462	207935887
chr1	209917974	209918130
chr1	209918846	209918981
chr1	210186965	210187154
chr1	210329057	210329265
chr1	210334063	210336108
chr1	210439524	210439782
chr1	211589627	211590302
chr1	211590385	211590959
chr1	211591126	211591358
chr1	219055126	219055251
chr1	219055287	219055406
chr1	219781796	219786514
chr1	220441005	220441133
chr1	220800185	220800532
chr1	223740921	223743915
chr1	225976931	225978054
chr1	226258576	226259702
chr1	226564814	226564931
chr1	226570771	226570889
chr1	226574017	226574155
chr1	226576348	226576467
chr1	226578176	226578307
chr1	227597672	227598027
chr1	227598108	227598256
chr1	227598342	227598652
chr1	227598676	227598797
chr1	227598852	227598955
chr1	227599832	227599943
chr1	231501153	231502234
chr1	231506299	231506456
chr1	231509721	231509857
chr1	231557255	231557656
chr1	231557661	231558056
chr1	235617460	235617563
chr1	235621902	235622028
chr1	235634182	235634285
chr1	235643362	235643465
chr1	235647629	235647775
chr1	235658033	235658151
chr1	241661078	241661282
chr1	241663728	241663901
chr1	241665733	241665882
chr1	241667333	241667557
chr1	243288740	243310212
chr1	243310223	243356860
chr1	243356865	243369245
chr1	243369255	243375501
chr1	244557764	244558253
chr1	244558274	244558376
chr1	244558388	244558494
chr1	244558595	244558698
chr1	244558884	244559007
chr1	245017431	245017815
chr1	245018717	245018922
chr1	247012696	247015170
chr1	247078978	247080106
chr1	247286631	247287738
chr1	247288725	247291019
chr1	247334034	247336320
chr1	247336591	247337681
chr1	248098888	248098990
chr1	248099120	248099260
chr1	248099394	248099492
chr1	248099957	248100070
chr1	248111625	248113814
chr1	248223463	248225614
chr1	248603508	248606217
chr1	248615003	248618193
chr1	248635647	248638610
chr1	248650823	248654028
chr1	248720652	248723857
chr1	248736104	248739062
chr1	248800464	248803646
chr1	248812447	248815173
chr1	249064914	249065071
chr1	249065989	249066116
chr1	249066150	249066281
chr2	20026035	20026669
chr2	24286002	24286259
chr2	24286399	24286536
chr2	25304199	25304291
chr2	26384497	26384588
chr2	26385200	26385533
chr2	26385549	26385898
chr2	27915845	27915995
chr2	32048556	32048901
chr2	32096806	32096942
chr2	37872293	37873867
chr2	37899229	37899357
chr2	43023502	43023608
chr2	43023665	43024067
chr2	43024205	43024853
chr2	43025142	43025574
chr2	43025928	43026032
chr2	43026084	43026177
chr2	44394059	44394170
chr2	47129376	47129830
chr2	47129834	47130152
chr2	47132358	47132745
chr2	47134940	47135104
chr2	55463753	55463967
chr2	55464420	55464576
chr2	55467138	55467321
chr2	55470066	55470227
chr2	55470544	55470661
chr2	55470669	55470815
chr2	55471156	55471380
chr2	55473491	55473600
chr2	55476540	55476682
chr2	55479651	55479799
chr2	55863031	55863134
chr2	58478639	58478750
chr2	60961527	60962285
chr2	60962333	60962755
chr2	60963516	60963627
chr2	61163143	61163452
chr2	61163469	61163609
chr2	61163804	61164020
chr2	61164404	61164534
chr2	61164690	61164844
chr2	62449332	62449463
chr2	62449940	62450328
chr2	62450385	62450641
chr2	69653428	69653534
chr2	69824177	69824276
chr2	69825169	69825645
chr2	69825979	69826253
chr2	69826289	69826383
chr2	69826409	69826559
chr2	69826729	69826886
chr2	73455156	73455714
chr2	73455915	73456103
chr2	73456583	73456706
chr2	73457230	73457360
chr2	73459176	73459381
chr2	73667720	73667821
chr2	73684520	73684657
chr2	73693402	73693793
chr2	73707196	73707378
chr2	73707466	73709391
chr2	73709408	73711988
chr2	73712268	73712452
chr2	73712737	73712848
chr2	73826136	73829989
chr2	73829996	73830872
chr2	73830882	73832726
chr2	73844594	73852925
chr2	73852930	73853293
chr2	73880823	73880924
chr2	73883593	73883720
chr2	73884040	73884405
chr2	73891620	73891801
chr2	73891886	73893810
chr2	73893827	73896407
chr2	73896696	73896890
chr2	73897286	73897397
chr2	73897772	73902470
chr2	73902480	73902896
chr2	73902898	73904314
chr2	73904889	73913221
chr2	73913267	73913634
chr2	74350499	74350593
chr2	74442338	74442493
chr2	74442615	74442744
chr2	74579342	74579436
chr2	75061266	75061778
chr2	75081407	75081589
chr2	75094749	75094918
chr2	75099413	75099554
chr2	75100390	75100507
chr2	75100959	75101079
chr2	75101381	75101586
chr2	75104282	75104457
chr2	75105803	75106058
chr2	75107381	75107703
chr2	75108824	75108994
chr2	75109234	75109374
chr2	75112608	75112724
chr2	75113408	75113523
chr2	75113598	75113808
chr2	75115017	75115193
chr2	75116395	75116615
chr2	75117913	75119080
chr2	75877435	75877533
chr2	86371053	86372012
chr2	86373178	86373333
chr2	86374817	86374965
chr2	86378408	86378658
chr2	86385704	86385856
chr2	86389088	86389196
chr2	86393622	86393777
chr2	86397861	86397979
chr2	86398328	86398442
chr2	86400765	86400895
chr2	86406546	86406757
chr2	86967088	86969337
chr2	87068294	87070509
chr2	87079059	87081267
chr2	87092462	87092566
chr2	87095532	87095636
chr2	87096705	87111290
chr2	87111293	87112215
chr2	87112237	87114202
chr2	87114331	87122486
chr2	87122499	87132264
chr2	87132310	87140683
chr2	87243624	87245824
chr2	87276050	87277748
chr2	87281637	87283879
chr2	87356230	87358346
chr2	87388819	87391222
chr2	87390591	87392883
chr2	87396612	87398870
chr2	87399100	87401329
chr2	87403283	87405445
chr2	87406069	87409810
chr2	87409071	87411258
chr2	87411483	87413968
chr2	87413228	87415503
chr2	87414876	87417353
chr2	87419386	87423055
chr2	87422485	87424786
chr2	87564975	87567196
chr2	88050752	88052943
chr2	89037482	89037605
chr2	89064376	89069597
chr2	89071111	89071216
chr2	89077290	89077788
chr2	89077815	89077972
chr2	89078029	89078614
chr2	89078777	89080685
chr2	89080691	89080896
chr2	89080911	89092594
chr2	89094858	89095258
chr2	89095356	89095479
chr2	89095495	89095783
chr2	89095825	89096272
chr2	89096299	89096436
chr2	89096453	89096648
chr2	89096679	89097011
chr2	89097087	89098195
chr2	89098217	89099367
chr2	89099381	89100565
chr2	89100822	89102229
chr2	89102377	89103888
chr2	89103964	89104300
chr2	89104620	89104722
chr2	89105217	89105355
chr2	89105707	89105816
chr2	89106400	89106559
chr2	89276953	89279010
chr2	90273042	90275298
chr2	90536775	90539030
chr2	91808223	91810468
chr2	95536173	95537431
chr2	95537439	95537764
chr2	95537769	95538093
chr2	95538099	95539593
chr2	95539648	95540071
chr2	95540133	95540387
chr2	95540438	95543568
chr2	95752445	95752556
chr2	95773914	95774029
chr2	96141848	96144109
chr2	96145099	96147211
chr2	96147152	96149410
chr2	96258823	96261078
chr2	96261025	96263126
chr2	96264122	96266396
chr2	96454400	96455742
chr2	96455764	96456100
chr2	96456197	96456314
chr2	96456327	96456917
chr2	96456932	96457771
chr2	96457956	96458141
chr2	96458166	96458357
chr2	96458371	96459110
chr2	96459457	96459843
chr2	96459862	96459993
chr2	96460011	96460375
chr2	96460385	96460694
chr2	96460711	96461036
chr2	96461070	96461196
chr2	96461223	96461419
chr2	96461492	96461633
chr2	96461651	96461846
chr2	96462129	96462287
chr2	96462409	96462640
chr2	96462658	96462797
chr2	96462806	96462917
chr2	96462938	96463234
chr2	96463251	96463384
chr2	96463475	96463929
chr2	96464055	96464198
chr2	96464226	96464395
chr2	96464414	96464667
chr2	96464716	96465083
chr2	96465096	96465490
chr2	96465524	96465707
chr2	96465739	96465936
chr2	96563842	96566085
chr2	96569459	96571703
chr2	96588260	96590403
chr2	96600115	96602462
chr2	96603565	96606818
chr2	96609286	96611894
chr2	96615411	96617563
chr2	96618616	96620815
chr2	96688063	96688174
chr2	96688277	96688384
chr2	96688521	96688864
chr2	96688880	96689016
chr2	96689373	96689525
chr2	96689653	96689934
chr2	96690156	96690346
chr2	96690378	96690558
chr2	96690592	96690984
chr2	96690997	96691358
chr2	96691407	96691660
chr2	96691679	96691848
chr2	96691876	96692019
chr2	96692145	96692599
chr2	96692690	96692823
chr2	96692840	96693136
chr2	96693157	96693268
chr2	96693277	96693416
chr2	96693434	96693665
chr2	96693787	96693945
chr2	96694228	96694423
chr2	96694441	96694582
chr2	96694655	96694851
chr2	96694878	96695004
chr2	96695038	96695363
chr2	96695380	96695689
chr2	96695699	96696063
chr2	96696081	96696212
chr2	96696231	96696617
chr2	96696964	96697703
chr2	96697717	96697908
chr2	96697933	96698118
chr2	96698303	96699142
chr2	96699157	96699747
chr2	96699760	96699879
chr2	96699976	96700312
chr2	96700334	96701685
chr2	97690646	97692844
chr2	97746988	97747269
chr2	97747397	97747551
chr2	97747890	97748026
chr2	97748042	97748389
chr2	97748526	97748633
chr2	97748729	97748839
chr2	97779099	97779450
chr2	97779611	97787331
chr2	97787381	97787852
chr2	97787928	97788653
chr2	97788670	97789601
chr2	97789643	97791369
chr2	97817208	97819280
chr2	97827940	97831214
chr2	97832240	97834594
chr2	97850037	97852229
chr2	97878194	97880412
chr2	97880068	97882266
chr2	97905902	97908269
chr2	98120832	98120991
chr2	98122603	98122712
chr2	98123065	98123203
chr2	98123698	98123800
chr2	98124120	98124457
chr2	98124533	98126048
chr2	98126196	98127600
chr2	98127886	98128509
chr2	98131136	98133505
chr2	98136155	98137350
chr2	98137364	98138513
chr2	98138535	98139641
chr2	98139717	98140049
chr2	98140080	98140275
chr2	98140292	98140430
chr2	98140457	98140908
chr2	98140950	98141239
chr2	98141255	98141376
chr2	98141476	98141885
chr2	98148184	98154372
chr2	98157343	98159538
chr2	98159190	98161412
chr2	98173129	98177584
chr2	98177633	98180829
chr2	98180987	98181568
chr2	98181625	98181782
chr2	98181809	98182317
chr2	98198433	98198538
chr2	98202078	98207307
chr2	98443524	98444616
chr2	98822827	98823095
chr2	98823410	98823687
chr2	98823770	98823887
chr2	98823979	98824093
chr2	99779218	99779328
chr2	99811203	99811369
chr2	99812034	99812454
chr2	99812459	99813183
chr2	101685185	101685318
chr2	101685334	101685440
chr2	101685560	101685655
chr2	107111567	107113778
chr2	107122316	107124531
chr2	108892267	108892431
chr2	108893266	108893359
chr2	108894012	108894132
chr2	108894368	108894547
chr2	109040429	109040552
chr2	110300899	110301832
chr2	110303616	110303826
chr2	110310655	110310808
chr2	110321934	110322123
chr2	110323331	110323446
chr2	110325381	110325565
chr2	110332149	110332356
chr2	110342694	110342909
chr2	110343290	110343427
chr2	110612425	110614648
chr2	110659884	110663109
chr2	110675824	110678370
chr2	110842151	110846408
chr2	110848094	110850226
chr2	111036323	111038425
chr2	111040124	111044389
chr2	111208290	111210836
chr2	111223550	111226775
chr2	111272013	111274233
chr2	112525833	112528136
chr2	112527562	112531231
chr2	112533261	112535740
chr2	112535110	112537392
chr2	112536646	112539135
chr2	112538906	112541096
chr2	112540352	112544094
chr2	112544720	112546887
chr2	112548833	112551069
chr2	112551295	112553552
chr2	112557275	112559562
chr2	112558934	112561337
chr2	112578152	112579852
chr2	112589772	112591884
chr2	112595433	112598349
chr2	112598352	112603280
chr2	112603574	112604131
chr2	112604138	112608010
chr2	112608011	112613776
chr2	112613778	112626022
chr2	112626040	112626420
chr2	112627113	112640165
chr2	112640463	112640557
chr2	112642844	112642939
chr2	112644588	112644726
chr2	112645576	112645729
chr2	112645937	112646064
chr2	112646085	112646496
chr2	112647129	112647318
chr2	113689869	113689966
chr2	113690299	113690431
chr2	113690744	113691748
chr2	114200328	114202482
chr2	114385066	114387417
chr2	114390616	114392778
chr2	114394263	114396493
chr2	114397494	114400672
chr2	114423997	114426539
chr2	114714925	114715030
chr2	122489523	122489671
chr2	127927698	127927836
chr2	128621663	128621815
chr2	128622152	128622778
chr2	128628380	128628481
chr2	128628823	128628944
chr2	128631392	128631503
chr2	128631691	128631823
chr2	128958268	128958426
chr2	129024724	129026457
chr2	129075603	129076446
chr2	130679435	130680307
chr2	130680313	130680960
chr2	130680962	130681836
chr2	130681934	130682163
chr2	130682231	130683824
chr2	130683839	130684187
chr2	130684215	130685143
chr2	130685251	130686845
chr2	130686914	130689300
chr2	130689421	130689895
chr2	130690937	130691821
chr2	130691850	130692107
chr2	130692209	130692889
chr2	130736638	130739446
chr2	130850424	130851546
chr2	130895897	130896031
chr2	130897606	130897836
chr2	130898012	130898230
chr2	130898429	130898552
chr2	130898714	130898816
chr2	130898826	130899154
chr2	130899272	130899396
chr2	130899578	130899710
chr2	130899846	130900361
chr2	130900470	130900937
chr2	130901145	130903382
chr2	130901349	130901484
chr2	130902920	130903025
chr2	130903146	130903293
chr2	130903598	130903708
chr2	130911467	130911568
chr2	130911612	130911747
chr2	130911839	130911975
chr2	130911979	130912096
chr2	130913012	130913225
chr2	130913836	130915957
chr2	130916931	130917085
chr2	130929606	130929903
chr2	130931767	130931897
chr2	130931924	130932350
chr2	130932405	130932989
chr2	130933126	130933278
chr2	130933423	130933661
chr2	130933686	130933788
chr2	130933806	130934431
chr2	130934472	130934624
chr2	130934999	130935099
chr2	130936752	130936961
chr2	130937570	130937748
chr2	130939176	130941377
chr2	130948427	130950610
chr2	130951635	130954808
chr2	130986014	130986175
chr2	131231199	131232879
chr2	131239021	131240128
chr2	131246036	131247709
chr2	131277852	131280670
chr2	131279694	131281973
chr2	131284115	131286527
chr2	131349383	131351806
chr2	131353946	131356227
chr2	131355244	131358067
chr2	131388124	131389797
chr2	131395707	131396826
chr2	131402958	131404631
chr2	132002516	132003635
chr2	132048975	132049284
chr2	132049346	132049615
chr2	132049631	132049738
chr2	132050005	132051375
chr2	132051386	132051545
chr2	132051741	132052006
chr2	132052308	132053168
chr2	132119536	132122341
chr2	132180373	132182114
chr2	132182124	132182680
chr2	132182778	132183121
chr2	132234870	132238033
chr2	132239255	132241369
chr2	132248420	132250620
chr2	132272182	132274308
chr2	132284728	132286968
chr2	135688627	135688761
chr2	135711005	135711305
chr2	137087240	137087468
chr2	137302635	137302766
chr2	139656165	139656492
chr2	145146002	145147600
chr2	145153970	145154166
chr2	145155949	145156241
chr2	152106201	152106434
chr2	152106503	152106611
chr2	152106616	152106770
chr2	152107119	152107898
chr2	152108081	152108190
chr2	152112038	152112204
chr2	152678398	152678555
chr2	158066841	158067346
chr2	158067424	158067756
chr2	159490569	159490809
chr2	159497126	159497279
chr2	159498985	159499217
chr2	159514630	159514834
chr2	159517859	159517971
chr2	159519400	159519607
chr2	159519773	159519965
chr2	159522912	159523083
chr2	159526220	159526435
chr2	159530382	159530519
chr2	159536927	159537941
chr2	161130564	161130743
chr2	161240417	161240574
chr2	161266579	161266733
chr2	162357581	162360053
chr2	162363346	162364479
chr2	162933024	162934222
chr2	171849265	171850479
chr2	171853155	171853283
chr2	171854221	171854331
chr2	171862674	171862804
chr2	171862977	171863163
chr2	171863471	171863585
chr2	171871350	171871470
chr2	171902673	171902882
chr2	171906313	171906468
chr2	171906566	171906695
chr2	171910261	171910375
chr2	171912970	171913086
chr2	171974238	171974379
chr2	172016831	172016977
chr2	172017004	172017194
chr2	172180278	172180884
chr2	172182545	172182667
chr2	172187060	172187220
chr2	172348425	172348543
chr2	172544280	172544385
chr2	172546644	172546783
chr2	172549276	172549413
chr2	172571824	172571961
chr2	172582115	172582233
chr2	172582419	172582600
chr2	172582692	172582810
chr2	172583287	172583433
chr2	172584317	172584487
chr2	172584804	172584936
chr2	172585214	172585368
chr2	172586206	172586371
chr2	172600546	172600707
chr2	172602299	172602445
chr2	172604273	172604931
chr2	174773659	174774999
chr2	174777791	174778006
chr2	174783312	174783446
chr2	174819597	174820726
chr2	174820741	174820971
chr2	174825406	174825530
chr2	174963969	174964113
chr2	175584391	175585577
chr2	176707612	176709030
chr2	177669851	177669953
chr2	177669963	177670064
chr2	177670427	177670569
chr2	178414887	178417589
chr2	178480826	178483525
chr2	179345201	179345648
chr2	179350359	179350492
chr2	179355374	179355549
chr2	179358567	179358724
chr2	179360210	179360396
chr2	179365775	179365913
chr2	179368476	179369430
chr2	179518588	179520824
chr2	179521972	179525083
chr2	192744907	192746966
chr2	198324641	198324817
chr2	198327337	198327463
chr2	198338471	198338825
chr2	198338843	198339140
chr2	198339426	198339528
chr2	198339564	198339785
chr2	201680056	201680171
chr2	202334664	202334783
chr2	202337665	202337807
chr2	202339357	202339487
chr2	202340330	202340473
chr2	202342329	202342519
chr2	202342795	202342922
chr2	202343068	202343332
chr2	202344739	202345449
chr2	203065499	203065723
chr2	203065728	203066599
chr2	207944922	207945884
chr2	207945886	207946000
chr2	207953173	207953318
chr2	207988490	207989140
chr2	208011238	208011409
chr2	208030182	208030422
chr2	208030634	208030812
chr2	208471076	208471201
chr2	208477885	208478078
chr2	209134163	209134266
chr2	209134383	209134481
chr2	209134508	209134730
chr2	209135474	209135610
chr2	210043536	210043629
chr2	210043684	210044438
chr2	210044455	210045264
chr2	210045348	210045466
chr2	210045538	210046527
chr2	210046558	210046744
chr2	210046787	210047574
chr2	210673916	210674353
chr2	210674841	210675143
chr2	216808013	216808191
chr2	216808588	216808697
chr2	216808990	216809095
chr2	216809257	216809679
chr2	217022024	217022161
chr2	217474533	217474840
chr2	217475113	217475681
chr2	218923466	218923852
chr2	218923987	218924395
chr2	218924424	218924667
chr2	218924717	218925618
chr2	218925643	218925901
chr2	218926658	218926842
chr2	218927468	218927592
chr2	218927594	218927750
chr2	218927754	218927851
chr2	218927863	218928284
chr2	218997585	218998003
chr2	218998300	218998406
chr2	218998410	218998566
chr2	218998568	218998859
chr2	218999763	219000024
chr2	219000049	219000961
chr2	219001195	219001825
chr2	219001980	219002365
chr2	219136092	219136281
chr2	219137281	219137490
chr2	219137492	219137671
chr2	222826415	222826535
chr2	222826681	222826980
chr2	222827054	222829176
chr2	223436557	223436736
chr2	223488984	223489145
chr2	223497908	223498038
chr2	223499104	223499261
chr2	223504290	223504396
chr2	223768710	223768852
chr2	223769165	223769306
chr2	223769484	223769582
chr2	230789614	230789726
chr2	230817191	230817645
chr2	230840944	230841073
chr2	230861454	230861647
chr2	230874109	230874278
chr2	230875399	230876314
chr2	230905021	230905146
chr2	230910362	230911151
chr2	230911166	230911444
chr2	230914467	230914631
chr2	230933262	230934259
chr2	231174366	231177359
chr2	231264576	231267569
chr2	231663446	231663567
chr2	232297819	232297923
chr2	232298274	232298510
chr2	232349232	232349340
chr2	233193881	233194061
chr2	233194062	233194397
chr2	233195268	233197541
chr2	233198058	233198177
chr2	233198236	233198391
chr2	233198508	233198647
chr2	233198846	233199034
chr2	233199063	233200442
chr2	233200624	233201246
chr2	233201623	233201943
chr2	233201945	233202054
chr2	233202222	233202385
chr2	233244313	233247045
chr2	233272517	233275126
chr2	233282914	233283218
chr2	233306127	233306298
chr2	233306299	233306836
chr2	233306847	233308920
chr2	233309179	233309441
chr2	233309559	233309683
chr2	233309777	233309964
chr2	233310005	233311383
chr2	233311416	233312041
chr2	233312394	233312803
chr2	233312973	233313128
chr2	233349714	233350018
chr2	233430145	233430242
chr2	234774085	234774599
chr2	234774777	234774879
chr2	234774962	234775401
chr2	234775434	234775876
chr2	238600779	238601173
chr2	238657829	238657975
chr2	238661939	238662132
chr2	238664727	238664838
chr2	238668694	238668859
chr2	238671237	238673790
chr2	240968502	240970513
chr2	240984145	240986156
chr2	241614874	241617292
chr2	241617871	241620977
chr2	241620570	241622822
chr2	241630760	241633017
chr2	241632755	241635864
chr2	241636445	241638859
chr2	242282395	242282516
chr2	242434519	242434651
chr3	1435572	1435824
chr3	1435849	1435947
chr3	2404155	2404257
chr3	4023322	4023424
chr3	9406710	9406850
chr3	9410140	9410302
chr3	9412933	9413145
chr3	9422210	9422321
chr3	9424887	9425001
chr3	9425885	9425987
chr3	9426267	9426419
chr3	9907639	9909079
chr3	9909186	9909310
chr3	9909340	9909592
chr3	9909631	9910650
chr3	9910714	9910993
chr3	9911013	9911792
chr3	10057952	10058431
chr3	10058881	10059855
chr3	10059962	10060095
chr3	10060153	10060406
chr3	10060436	10061106
chr3	10063791	10064157
chr3	10064392	10064679
chr3	10064699	10065470
chr3	10087160	10087276
chr3	10088107	10088286
chr3	10090225	10092028
chr3	10092326	10092502
chr3	10093106	10094243
chr3	10095281	10096034
chr3	10096489	10097207
chr3	10097524	10097631
chr3	10097720	10098246
chr3	10098260	10099037
chr3	10099143	10099294
chr3	10099315	10101205
chr3	10101497	10101710
chr3	10101879	10102205
chr3	10103359	10103554
chr3	10103806	10103911
chr3	10104463	10108533
chr3	10108534	10109337
chr3	10109368	10109637
chr3	10109757	10111147
chr3	10112832	10113575
chr3	10113628	10114106
chr3	10114122	10115622
chr3	10168602	10168784
chr3	10291031	10291141
chr3	10342706	10342812
chr3	10342916	10343070
chr3	10346715	10346839
chr3	10347242	10347386
chr3	10353638	10353795
chr3	10354283	10354416
chr3	11911488	11911592
chr3	11911779	11913745
chr3	11914007	11915291
chr3	11915738	11916386
chr3	11916413	11916531
chr3	11916542	11917359
chr3	11917448	11917979
chr3	11917993	11918765
chr3	11918862	11919013
chr3	11919942	11921330
chr3	11921357	11922070
chr3	11922245	11922585
chr3	11922862	11923138
chr3	11923476	11925802
chr3	11926110	11927888
chr3	11927889	11928690
chr3	11928721	11928986
chr3	11929131	11931250
chr3	11931302	11931775
chr3	11931791	11932092
chr3	11932410	11933621
chr3	11940483	11940630
chr3	11941025	11941642
chr3	12298874	12299389
chr3	12299499	12299594
chr3	12531268	12531494
chr3	12544748	12545073
chr3	12545179	12545290
chr3	12560545	12560652
chr3	12571248	12571380
chr3	12573056	12573166
chr3	12574148	12574821
chr3	12632311	12632445
chr3	12650727	12650827
chr3	12881031	12881262
chr3	12881266	12881642
chr3	12882037	12882175
chr3	13374306	13374521
chr3	13374601	13374819
chr3	13377707	13377929
chr3	13377962	13378099
chr3	13378100	13378449
chr3	13378593	13378776
chr3	13378864	13379072
chr3	13379087	13379192
chr3	13379436	13379583
chr3	13379811	13379912
chr3	13379964	13380238
chr3	13380396	13380497
chr3	13380775	13380998
chr3	13381329	13381420
chr3	13381939	13382051
chr3	13383806	13383905
chr3	13383962	13384111
chr3	13384661	13384799
chr3	13397887	13398012
chr3	13417003	13417298
chr3	13417460	13417717
chr3	13417728	13417858
chr3	13417875	13418092
chr3	13418104	13418298
chr3	13418371	13418716
chr3	13418841	13418998
chr3	13419134	13419252
chr3	13419525	13419647
chr3	13429937	13430154
chr3	13430329	13430434
chr3	13441198	13441824
chr3	13442192	13442352
chr3	13973765	13974396
chr3	13974722	13974862
chr3	13974942	13976115
chr3	13976138	13976659
chr3	13976735	13976933
chr3	13977474	13977578
chr3	13977694	13978158
chr3	13978482	13979154
chr3	13979399	13979514
chr3	13979817	13979939
chr3	14240083	14240196
chr3	14485120	14485378
chr3	14487240	14487368
chr3	14489099	14489333
chr3	14499446	14499570
chr3	14509583	14509731
chr3	14518699	14518862
chr3	14520584	14520703
chr3	14523251	14523358
chr3	14526363	14526512
chr3	14614142	14615034
chr3	14615108	14615203
chr3	14615268	14615530
chr3	14615604	14616236
chr3	14851359	14851969
chr3	14852575	14852714
chr3	14859757	14860944
chr3	14860967	14861492
chr3	14861568	14861766
chr3	14861886	14861981
chr3	14862096	14862340
chr3	14862341	14862561
chr3	14862600	14863278
chr3	14881800	14881925
chr3	14951437	14951578
chr3	16375400	16375598
chr3	16397152	16397678
chr3	16397684	16397990
chr3	16398098	16398322
chr3	16398329	16398547
chr3	16398755	16398981
chr3	16398982	16399229
chr3	16399359	16399958
chr3	16400141	16400332
chr3	16400418	16402847
chr3	16402879	16403647
chr3	16403809	16403951
chr3	16403974	16404122
chr3	16404136	16404432
chr3	16404505	16405279
chr3	16405449	16405589
chr3	16405626	16405869
chr3	16405933	16406208
chr3	16406433	16406571
chr3	16410227	16411789
chr3	16411793	16412171
chr3	16412178	16412803
chr3	16412892	16413392
chr3	16413427	16413760
chr3	16413911	16414487
chr3	16414604	16415482
chr3	16415490	16415695
chr3	16415696	16416718
chr3	16416754	16416890
chr3	16416913	16417484
chr3	16417557	16417853
chr3	16417988	16418502
chr3	16418510	16419267
chr3	16419275	16419381
chr3	16419436	16419703
chr3	16419817	16419971
chr3	16419973	16420380
chr3	16420501	16420676
chr3	16420690	16421220
chr3	16421302	16422200
chr3	16422207	16422574
chr3	16422575	16423319
chr3	16423365	16423953
chr3	16424023	16424150
chr3	16424736	16425062
chr3	16425141	16426355
chr3	16426393	16426894
[truncated: 11,673 more rows]
