# Supplementary material for: Systematic analysis of paralogous regions in 41,755 exomes uncovers clinically relevant variation
Source: Research Square preprint supplement (doi:10.21203/rs.3.rs-2302399/v1), 2022-11-29
Supplement: Supplementary file 15 [file STable22.xlsx]

## Sheet: STable22
Chrom	Start	End
chr1	564633	565652
chr1	1421388	1422582
chr1	1425942	1426115
chr1	1452442	1453472
chr1	1454280	1454402
chr1	1459212	1460262
chr1	1461248	1462441
chr1	1588326	1589535
chr1	1630717	1633728
chr1	1633797	1635384
chr1	1635926	1637731
chr1	1638407	1641658
chr1	1643158	1647254
chr1	1656282	1657433
chr1	1665570	1666830
chr1	1669261	1671591
chr1	9840958	9841057
chr1	9841624	9841772
chr1	12855602	12855704
chr1	12979714	12980789
chr1	13035412	13036065
chr1	13037431	13038309
chr1	13140319	13140968
chr1	13142639	13142786
chr1	13163072	13163336
chr1	13182980	13184494
chr1	13198376	13198640
chr1	13331148	13331798
chr1	13387853	13390155
chr1	13448421	13448722
chr1	13449204	13450205
chr1	13474817	13475642
chr1	13475974	13476820
chr1	13521545	13522620
chr1	13523257	13524841
chr1	13525700	13527434
chr1	13607179	13608513
chr1	13608639	13610940
chr1	13671087	13671938
chr1	13695641	13696479
chr1	13697831	13698570
chr1	13881812	13881949
chr1	15809784	15809919
chr1	16567654	16567800
chr1	16567864	16567968
chr1	16805618	16805723
chr1	16806223	16806367
chr1	16806706	16807193
chr1	16807474	16808110
chr1	16808423	16808571
chr1	16808622	16809650
chr1	16819330	16819501
chr1	16819674	16819787
chr1	16820043	16820627
chr1	16820650	16820888
chr1	16821328	16821428
chr1	16911391	16912683
chr1	16952963	16953218
chr1	16960938	16961249
chr1	16961339	16961544
chr1	16961912	16962105
chr1	16971115	16971908
chr1	16971912	16976782
chr1	16972120	16973186
chr1	16973224	16973420
chr1	16973430	16973567
chr1	16973583	16974214
chr1	16974227	16974327
chr1	16974342	16974496
chr1	16974506	16974964
chr1	16974986	16975153
chr1	16975165	16975547
chr1	16975563	16976797
chr1	16976809	16976990
chr1	16977004	16977117
chr1	16977201	16977411
chr1	16977479	16977621
chr1	16977645	16977784
chr1	16977798	16977970
chr1	16977993	16978094
chr1	16978128	16978390
chr1	16978580	16979204
chr1	16979215	16979441
chr1	16979533	16980093
chr1	16980240	16980416
chr1	16980779	16980928
chr1	16981619	16981785
chr1	16981880	16981994
chr1	17015546	17018959
chr1	17018962	17019627
chr1	17019636	17020539
chr1	17020540	17026120
chr1	17026244	17028087
chr1	17028091	17028680
chr1	17028684	17036374
chr1	17036420	17036895
chr1	17036896	17045229
chr1	17045564	17047222
chr1	17059799	17061461
chr1	17065774	17066153
chr1	17066167	17068429
chr1	17068587	17071451
chr1	17071896	17072062
chr1	17072107	17072238
chr1	17072294	17072442
chr1	17072454	17072606
chr1	17072692	17072801
chr1	17073036	17073164
chr1	17073350	17073468
chr1	17073483	17073621
chr1	17073754	17073914
chr1	17073928	17074180
chr1	17074198	17074300
chr1	17074387	17074568
chr1	17074733	17074835
chr1	17074918	17075123
chr1	17194581	17195813
chr1	21752676	21752907
chr1	21754484	21757029
chr1	22328577	22329718
chr1	22336031	22337252
chr1	22338347	22339613
chr1	24227536	24227841
chr1	24227867	24229213
chr1	24229291	24229686
chr1	24275510	24275576
chr1	25642866	25644035
chr1	25655322	25655498
chr1	25715025	25716183
chr1	28013343	28013457
chr1	28422140	28422433
chr1	31567494	31567917
chr1	35586621	35586866
chr1	35587184	35588088
chr1	35588092	35588713
chr1	39976291	39978208
chr1	39979626	39983162
chr1	40229871	40231265
chr1	42506214	42506313
chr1	42506394	42506583
chr1	42506683	42506790
chr1	42506943	42507063
chr1	42507079	42507183
chr1	42507425	42507548
chr1	42507862	42508390
chr1	43368998	43369111
chr1	43369334	43369432
chr1	43369516	43370091
chr1	44315093	44315874
chr1	44315894	44316602
chr1	44316667	44316769
chr1	44316894	44317426
chr1	46909168	46909295
chr1	46909489	46909626
chr1	46928654	46928752
chr1	47347953	47349496
chr1	47352230	47353681
chr1	47608408	47611069
chr1	48790631	48790933
chr1	48790935	48791098
chr1	48791163	48791404
chr1	48791411	48791687
chr1	52719402	52719937
chr1	53237808	53238191
chr1	62504603	62505067
chr1	62655997	62656137
chr1	70385081	70386008
chr1	71126344	71126760
chr1	71126780	71126895
chr1	76208107	76209405
chr1	76209562	76209795
chr1	76209868	76210134
chr1	78312448	78312545
chr1	78312960	78313203
chr1	78313216	78315144
chr1	78315155	78315315
chr1	82187710	82187820
chr1	89872822	89875043
chr1	89875645	89877270
chr1	89884162	89885134
chr1	89885155	89887464
chr1	89887494	89890230
chr1	89890280	89890835
chr1	89891577	89891718
chr1	89891740	89892802
chr1	91358136	91358554
chr1	91358721	91358888
chr1	91358936	91359569
chr1	91793912	91795819
chr1	92590943	92591135
chr1	92591435	92591566
chr1	92591647	92591770
chr1	92591903	92592113
chr1	92592202	92592670
chr1	92592697	92592913
chr1	96883910	96884005
chr1	96884143	96884389
chr1	96884547	96885489
chr1	100678836	100679506
chr1	100680080	100680179
chr1	104163853	104164893
chr1	104200125	104201543
chr1	104202975	104203545
chr1	104235672	104237090
chr1	104257134	104257932
chr1	104257978	104259016
chr1	104294265	104295680
chr1	104296840	104297710
chr1	105976623	105976733
chr1	105976920	105977088
chr1	106240724	106240826
chr1	108779276	108780506
chr1	108866101	108866233
chr1	108922043	108923359
chr1	108924617	108925850
chr1	108996508	108997819
chr1	109000908	109004574
chr1	109007287	109008585
chr1	109009494	109010775
chr1	109012810	109013888
chr1	110242240	110243563
chr1	111550397	111550695
chr1	111553234	111553358
chr1	111825964	111826104
chr1	111905126	111905255
chr1	111928700	111928840
chr1	113466369	113466573
chr1	113466578	113467028
chr1	117282029	117282741
chr1	117282772	117284361
chr1	118091708	118091840
chr1	118092801	118093050
chr1	118319708	118321532
chr1	120427925	120428136
chr1	120428578	120429031
chr1	120429443	120429624
chr1	120571789	120573249
chr1	120903673	120906090
chr1	121115260	121116637
chr1	121123945	121125330
chr1	121127678	121130289
chr1	121244205	121244335
chr1	121244367	121244500
chr1	121244508	121244608
chr1	121244619	121244960
chr1	121244968	121245721
chr1	121259908	121272517
chr1	121272787	121273827
chr1	121280217	121280617
chr1	121281799	121282631
chr1	121282637	121283821
chr1	121283824	121296622
chr1	121296828	121300077
chr1	121300088	121302481
chr1	121302674	121311742
chr1	121311747	121314710
chr1	144156719	144157296
chr1	144676363	144678100
chr1	144679307	144680673
chr1	145138024	145139228
chr1	145139361	145139957
chr1	145209194	145210476
chr1	145272515	145273839
chr1	145309625	145310276
chr1	145898744	145900061
chr1	146053173	146053325
chr1	146056800	146057962
chr1	146309980	146311256
chr1	146314355	146315687
chr1	146315906	146318325
chr1	146320491	146321588
chr1	146321704	146324113
chr1	146333575	146334509
chr1	146650054	146650268
chr1	146650293	146650411
chr1	146650532	146650711
chr1	146650719	146650827
chr1	146651094	146651235
chr1	146651249	146651530
chr1	146674060	146674176
chr1	146674922	146675055
chr1	146675303	146675420
chr1	146675575	146675891
chr1	146675952	146676283
chr1	146676363	146676456
chr1	147410255	147411562
chr1	147414971	147416742
chr1	147440437	147441761
chr1	147465093	147482096
chr1	148193719	148193844
chr1	148329951	148330542
chr1	148749556	148750221
chr1	148863855	148863957
chr1	148900973	148901339
chr1	149290218	149291650
chr1	149759500	149760644
chr1	149811640	149815537
chr1	149831723	149833365
chr1	152095529	152095627
chr1	152095824	152096086
chr1	152275704	152276979
chr1	152328266	152328494
chr1	152372195	152372669
chr1	153353086	153353188
chr1	154386776	154387363
chr1	155182611	155185768
chr1	155185985	155188001
chr1	155188033	155188947
chr1	155188948	155189080
chr1	155189148	155189454
chr1	155189532	155189646
chr1	155189648	155189796
chr1	155197093	155197286
chr1	155197287	155197430
chr1	155197494	155198065
chr1	155200743	155201230
chr1	155201244	155205116
chr1	155556007	155556137
chr1	155557247	155557337
chr1	155557729	155557837
chr1	155558008	155559674
chr1	155561100	155561458
chr1	155561465	155561681
chr1	155561709	155562292
chr1	155563056	155563156
chr1	155563210	155563421
chr1	155565576	155566141
chr1	155566162	155566396
chr1	155566426	155566853
chr1	155568570	155568876
chr1	155568883	155569305
chr1	155584480	155584628
chr1	155585291	155586627
chr1	155588277	155589156
chr1	155619407	155619512
chr1	155715085	155718015
chr1	155719123	155719455
chr1	155719679	155720052
chr1	155735602	155736651
chr1	155744490	155745219
chr1	157693687	157693791
chr1	158147411	158147501
chr1	159014494	159015781
chr1	159674982	159675125
chr1	161517587	161518898
chr1	161550576	161552143
chr1	161557530	161558901
chr1	161560441	161562716
chr1	161568829	161570110
chr1	161575523	161577900
chr1	162415305	162415496
chr1	162415537	162415679
chr1	167489022	167489119
chr1	167489320	167489549
chr1	167489592	167489705
chr1	167490289	167490482
chr1	168215630	168216238
chr1	170338042	170338550
chr1	170338612	170338745
chr1	170338753	170339253
chr1	172717390	172717532
chr1	172717602	172717767
chr1	172717792	172717917
chr1	172718002	172719311
chr1	178714999	178715147
chr1	179416061	179416921
chr1	179416981	179417452
chr1	179417524	179417716
chr1	187677681	187677837
chr1	196799146	196800336
chr1	196883503	196884878
chr1	196912280	196913692
chr1	198648423	198648522
chr1	201497612	201497726
chr1	207718241	207719581
chr1	207719987	207721459
chr1	207723472	207724877
chr1	207725536	207726885
chr1	207733492	207734728
chr1	207736839	207738100
chr1	207742612	207743975
chr1	207817674	207818309
chr1	207818560	207818768
chr1	207818864	207819941
chr1	207819950	207820080
chr1	207820240	207820557
chr1	207820750	207820875
chr1	207820935	207821474
chr1	207821539	207822727
chr1	207822742	207822882
chr1	207825370	207826307
chr1	207826384	207827069
chr1	207827185	207828853
chr1	207828914	207829294
chr1	207829600	207831314
chr1	207831328	207831742
chr1	209917974	209918130
chr1	209918846	209918981
chr1	210439524	210439782
chr1	211589627	211590302
chr1	211590385	211590959
chr1	211591126	211591358
chr1	219055126	219055251
chr1	219055287	219055406
chr1	220441005	220441133
chr1	220800185	220800532
chr1	223741421	223743415
chr1	227597672	227598027
chr1	227598108	227598256
chr1	227598342	227598652
chr1	227598676	227598797
chr1	227598852	227598955
chr1	227599832	227599943
chr1	244557764	244558253
chr1	244558274	244558376
chr1	244558388	244558494
chr1	244558595	244558698
chr1	244558884	244559007
chr1	247289225	247290519
chr1	247337091	247337181
chr1	248098888	248098990
chr1	248099120	248099260
chr1	248099394	248099492
chr1	248099957	248100070
chr1	248223963	248225114
chr1	248604008	248605717
chr1	248721152	248723357
chr1	248736604	248738562
chr1	248800964	248803146
chr1	249064914	249065071
chr1	249065989	249066116
chr1	249066150	249066281
chr2	20026035	20026669
chr2	25304199	25304291
chr2	26384497	26384588
chr2	26385200	26385533
chr2	26385549	26385898
chr2	32048556	32048901
chr2	43023502	43023608
chr2	43023665	43024067
chr2	43024205	43024853
chr2	43025142	43025574
chr2	43025928	43026032
chr2	43026084	43026177
chr2	44394059	44394170
chr2	58478639	58478750
chr2	60961527	60962285
chr2	60962333	60962755
chr2	60963516	60963627
chr2	61163143	61163452
chr2	61163469	61163609
chr2	61163804	61164020
chr2	61164404	61164534
chr2	61164690	61164844
chr2	69824177	69824276
chr2	69825169	69825645
chr2	69825979	69826253
chr2	69826289	69826383
chr2	69826409	69826559
chr2	69826729	69826886
chr2	73880823	73880924
chr2	73883593	73883720
chr2	73884040	73884405
chr2	73891620	73891801
chr2	73891886	73893810
chr2	73893827	73896407
chr2	73896696	73896890
chr2	73897286	73897397
chr2	73897772	73902470
chr2	73902480	73902896
chr2	73902898	73904314
chr2	73904889	73913221
chr2	73913267	73913634
chr2	74350499	74350593
chr2	74579342	74579436
chr2	75877435	75877533
chr2	87092462	87092566
chr2	87095532	87095636
chr2	87096705	87111290
chr2	87111293	87112215
chr2	87112237	87114202
chr2	87114331	87122486
chr2	87122499	87132264
chr2	87132310	87140683
chr2	87276550	87277248
chr2	87282137	87283379
chr2	87356730	87357846
chr2	87389319	87390722
chr2	87391091	87392383
chr2	87397112	87398370
chr2	87399600	87400829
chr2	87403783	87404945
chr2	87406569	87409310
chr2	87409571	87410758
chr2	87411983	87413468
chr2	87413728	87415003
chr2	87415376	87416853
chr2	87419886	87422555
chr2	87422985	87424286
chr2	87565475	87566696
chr2	88051252	88052443
chr2	89064376	89069597
chr2	89071111	89071216
chr2	89077290	89077788
chr2	89077815	89077972
chr2	89078029	89078614
chr2	89078777	89080685
chr2	89080691	89080896
chr2	89080911	89092594
chr2	89094858	89095258
chr2	89095356	89095479
chr2	89095495	89095783
chr2	89095825	89096272
chr2	89096299	89096436
chr2	89096453	89096648
chr2	89096679	89097011
chr2	89097087	89098195
chr2	89098217	89099367
chr2	89099381	89100565
chr2	89100822	89102229
chr2	89102377	89103888
chr2	89103964	89104300
chr2	89104620	89104722
chr2	89105217	89105355
chr2	89105707	89105816
chr2	89106400	89106559
chr2	89277453	89278510
chr2	90273542	90274798
chr2	91808723	91809968
chr2	96259323	96260578
chr2	96261525	96262626
chr2	96264622	96265896
chr2	96454400	96455742
chr2	96455764	96456100
chr2	96456197	96456314
chr2	96456327	96456917
chr2	96456932	96457771
chr2	96457956	96458141
chr2	96458166	96458357
chr2	96458371	96459110
chr2	96459457	96459843
chr2	96459862	96459993
chr2	96460011	96460375
chr2	96460385	96460694
chr2	96460711	96461036
chr2	96461070	96461196
chr2	96461223	96461419
chr2	96461492	96461633
chr2	96461651	96461846
chr2	96462129	96462287
chr2	96462409	96462640
chr2	96462658	96462797
chr2	96462806	96462917
chr2	96462938	96463234
chr2	96463251	96463384
chr2	96463475	96463929
chr2	96464055	96464198
chr2	96464226	96464395
chr2	96464414	96464667
chr2	96464716	96465083
chr2	96465096	96465490
chr2	96465524	96465707
chr2	96465739	96465936
chr2	96564342	96565585
chr2	96588760	96589903
chr2	96600615	96601962
chr2	96604065	96606318
chr2	96615911	96617063
chr2	97691146	97692344
chr2	97746988	97747269
chr2	97747397	97747551
chr2	97747890	97748026
chr2	97748042	97748389
chr2	97748526	97748633
chr2	97748729	97748839
chr2	98131636	98133005
chr2	98157843	98159038
chr2	98159690	98160912
chr2	98444024	98444116
chr2	98822827	98823095
chr2	98823410	98823687
chr2	98823770	98823887
chr2	98823979	98824093
chr2	101685185	101685318
chr2	101685334	101685440
chr2	101685560	101685655
chr2	107112067	107113278
chr2	107122816	107124031
chr2	108892267	108892431
chr2	108893266	108893359
chr2	108894012	108894132
chr2	108894368	108894547
chr2	109040429	109040552
chr2	111036823	111037925
chr2	111040624	111043889
chr2	111208790	111210336
chr2	111224050	111226275
chr2	111272513	111273733
chr2	112644588	112644726
chr2	112645576	112645729
chr2	112645937	112646064
chr2	112646085	112646496
chr2	112647129	112647318
chr2	113689869	113689966
chr2	113690299	113690431
chr2	113690744	113691748
chr2	114394763	114395993
chr2	114397994	114400172
chr2	114424497	114426039
chr2	127927698	127927836
chr2	128958268	128958426
chr2	130679435	130680307
chr2	130680313	130680960
chr2	130680962	130681836
chr2	130681934	130682163
chr2	130682231	130683824
chr2	130683839	130684187
chr2	130684215	130685143
chr2	130685251	130686845
chr2	130686914	130689300
chr2	130689421	130689895
chr2	130690937	130691821
chr2	130691850	130692107
chr2	130692209	130692889
chr2	130986014	130986175
chr2	131231699	131232379
chr2	131239521	131239628
chr2	131246536	131247209
chr2	131278352	131280170
chr2	131284615	131286027
chr2	131354446	131355727
chr2	132003016	132003135
chr2	132048975	132049284
chr2	132049346	132049615
chr2	132049631	132049738
chr2	132050005	132051375
chr2	132051386	132051545
chr2	132051741	132052006
chr2	132052308	132053168
chr2	132120036	132121841
chr2	132180373	132182114
chr2	132182124	132182680
chr2	132182778	132183121
chr2	132235370	132237533
chr2	132239755	132240869
chr2	132248920	132250120
chr2	132272682	132273808
chr2	132285228	132286468
chr2	137087240	137087468
chr2	137302635	137302766
chr2	139656165	139656492
chr2	158066841	158067346
chr2	158067424	158067756
chr2	162358081	162359553
chr2	162363846	162363979
chr2	162933024	162934222
chr2	172348425	172348543
chr2	175584891	175585077
chr2	176707612	176709030
chr2	177669851	177669953
chr2	177669963	177670064
chr2	177670427	177670569
chr2	178481326	178483025
chr2	179522472	179524583
chr2	192744907	192746966
chr2	203065499	203065723
chr2	203065728	203066599
chr2	209134163	209134266
chr2	209134383	209134481
chr2	209134508	209134730
chr2	209135474	209135610
chr2	210043536	210043629
chr2	210043684	210044438
chr2	210044455	210045264
chr2	210045348	210045466
chr2	210045538	210046527
chr2	210046558	210046744
chr2	210046787	210047574
chr2	210673916	210674353
chr2	210674841	210675143
chr2	217022024	217022161
chr2	217474533	217474840
chr2	217475113	217475681
chr2	218923466	218923852
chr2	218923987	218924395
chr2	218924424	218924667
chr2	218924717	218925618
chr2	218925643	218925901
chr2	218926658	218926842
chr2	218927468	218927592
chr2	218927594	218927750
chr2	218927754	218927851
chr2	218927863	218928284
chr2	222826415	222826535
chr2	222826681	222826980
chr2	222827054	222829176
chr2	223768710	223768852
chr2	223769165	223769306
chr2	223769484	223769582
chr2	231265076	231267069
chr2	232297819	232297923
chr2	232298274	232298510
chr2	233273017	233274626
chr2	233282914	233283218
chr2	233306127	233306298
chr2	233306299	233306836
chr2	233306847	233308920
chr2	233309179	233309441
chr2	233309559	233309683
chr2	233309777	233309964
chr2	233310005	233311383
chr2	233311416	233312041
chr2	233312394	233312803
chr2	233312973	233313128
chr2	234774085	234774599
chr2	234774777	234774879
chr2	234774962	234775401
chr2	234775434	234775876
chr2	240984645	240985656
chr2	241621070	241622322
chr2	241633255	241635364
chr2	241636945	241638359
chr3	1435572	1435824
chr3	1435849	1435947
chr3	2404155	2404257
chr3	4023322	4023424
chr3	10057952	10058431
chr3	10058881	10059855
chr3	10059962	10060095
chr3	10060153	10060406
chr3	10060436	10061106
chr3	10063791	10064157
chr3	10064392	10064679
chr3	10064699	10065470
chr3	11911488	11911592
chr3	11911779	11913745
chr3	11914007	11915291
chr3	11915738	11916386
chr3	11916413	11916531
chr3	11916542	11917359
chr3	11917448	11917979
chr3	11917993	11918765
chr3	11918862	11919013
chr3	11919942	11921330
chr3	11921357	11922070
chr3	11922245	11922585
chr3	11922862	11923138
chr3	11923476	11925802
chr3	11926110	11927888
chr3	11927889	11928690
chr3	11928721	11928986
chr3	11929131	11931250
chr3	11931302	11931775
chr3	11931791	11932092
chr3	11932410	11933621
chr3	11940483	11940630
chr3	11941025	11941642
chr3	12298874	12299389
chr3	12299499	12299594
chr3	13973765	13974396
chr3	13974722	13974862
chr3	13974942	13976115
chr3	13976138	13976659
chr3	13976735	13976933
chr3	13977474	13977578
chr3	13977694	13978158
chr3	13978482	13979154
chr3	13979399	13979514
chr3	13979817	13979939
chr3	14614142	14615034
chr3	14615108	14615203
chr3	14615268	14615530
chr3	14615604	14616236
chr3	16733276	16733401
chr3	16733509	16733766
chr3	16733934	16734051
chr3	16734305	16734411
chr3	16735321	16735425
chr3	16735450	16735562
chr3	16735611	16735710
chr3	25797636	25797738
chr3	29130890	29131090
chr3	31494282	31496341
chr3	31496709	31497508
chr3	31497528	31498375
chr3	31836285	31836404
chr3	33075516	33075649
chr3	33075666	33076035
chr3	33076185	33076325
chr3	33076351	33076458
chr3	34914266	34914378
chr3	34915444	34915550
chr3	34915804	34915999
chr3	34916197	34916346
chr3	36211251	36211355
chr3	36211372	36211555
chr3	36211717	36211817
chr3	36212204	36212336
chr3	37017487	37017686
chr3	37017818	37018764
chr3	38093138	38093303
chr3	38093631	38093984
chr3	38367152	38367256
chr3	38367718	38367994
chr3	39685424	39685529
chr3	42019556	42019696
chr3	42019735	42019834
chr3	44609010	44609846
chr3	44620482	44621254
chr3	44621378	44622018
chr3	44622100	44622253
chr3	44622397	44622876
chr3	46182849	46183414
chr3	46183427	46184156
chr3	46184242	46185083
chr3	46352565	46352664
chr3	46352682	46352773
chr3	46352836	46352931
chr3	46352954	46353051
chr3	46353173	46353309
chr3	48000960	48001208
chr3	48202359	48202471
chr3	48297543	48297949
chr3	48298055	48298285
chr3	50823685	50823867
chr3	50823930	50824071
chr3	50824142	50824551
chr3	50824733	50824980
chr3	50825003	50825971
chr3	54081773	54082161
chr3	54082188	54082636
chr3	54082721	54082845
chr3	57504957	57505516
chr3	69519708	69519931
chr3	69520003	69520114
chr3	69520119	69520264
chr3	69520307	69521077
chr3	69521268	69521368
chr3	69521453	69521620
chr3	72925821	72926094
chr3	72926171	72927086
chr3	72927237	72927337
chr3	75376699	75381787
chr3	75381791	75382900
chr3	75383188	75386579
chr3	75387759	75389223
chr3	87100409	87100509
chr3	88144380	88144537
chr3	88144601	88144799
chr3	88144896	88145078
chr3	88367437	88367529
chr3	88367728	88367827
chr3	88368369	88368483
chr3	94224609	94226333
chr3	96495691	96495912
chr3	96495918	96496008
chr3	96496076	96497341
chr3	97851137	97852318
chr3	98153122	98153223
chr3	98153612	98153742
chr3	98153751	98153911
chr3	98376341	98376544
chr3	98376623	98377117
chr3	98377181	98377976
chr3	98378115	98378246
chr3	98378480	98379240
chr3	98379312	98380414
chr3	99940567	99940669
chr3	99940964	99941141
chr3	99942337	99942471
chr3	99942658	99942755
chr3	100382893	100383969
chr3	100384221	100384319
chr3	102960019	102960195
chr3	103783221	103783359
chr3	113638069	113638225
chr3	113638292	113638723
chr3	113638789	113639324
chr3	120525726	120525927
chr3	120525939	120526063
chr3	123697778	123699035
chr3	125695089	125696604
chr3	126379455	126379593
chr3	126380144	126380284
chr3	126380341	126380443
chr3	126381674	126381775
chr3	126382285	126382386
chr3	126383352	126383584
chr3	126383974	126384067
chr3	126384225	126384504
chr3	126384556	126384662
chr3	126384890	126385044
chr3	126385296	126385391
chr3	126385405	126385612
chr3	126385701	126385884
chr3	126386029	126386369
chr3	126386370	126386507
chr3	126386540	126386766
chr3	126387807	126388025
chr3	126388109	126388325
chr3	128394471	128394596
chr3	128583619	128584841
chr3	129041545	129041664
chr3	129041886	129042181
chr3	129042353	129042605
chr3	129042616	129042746
chr3	129042763	129042980
chr3	129042992	129043186
chr3	129043555	129043919
chr3	129044046	129044202
chr3	129044338	129044447
chr3	129044544	129044668
chr3	129044779	129044999
chr3	129045174	129045270
chr3	129112612	129113251
chr3	129115265	129115496
chr3	129115499	129115884
chr3	129116279	129116420
chr3	131079788	131080503
chr3	131080572	131080677
chr3	131080998	131081101
chr3	131081115	131081307
chr3	131082135	131082289
chr3	131082484	131082659
chr3	131082907	131083038
chr3	131245371	131245632
chr3	131245710	131246975
chr3	136617245	136617388
chr3	136617424	136617913
chr3	136618051	136618169
chr3	136618266	136618367
chr3	136618373	136618515
chr3	136618599	136618853
chr3	142894898	142895389
chr3	142895461	142896190
chr3	142896366	142897459
chr3	145403345	145403772
chr3	148702654	148703410
chr3	149699787	149700147
chr3	151496585	151496698
chr3	151501908	151502065
chr3	154071366	154071487
chr3	155828379	155828481
chr3	155828494	155828627
chr3	155828722	155828842
chr3	155829564	155829780
chr3	155830220	155830579
chr3	155830661	155830829
chr3	155831443	155831588
chr3	155831674	155832094
chr3	155832127	155832234
chr3	160170421	160171602
chr3	170669638	170670581
chr3	170670583	170671810
chr3	170671816	170671985
chr3	172144702	172144810
chr3	172320229	172320660
chr3	178975815	178978875
chr3	178978996	178979373
chr3	179183379	179183536
chr3	179183674	179183807
chr3	180545724	180546307
chr3	180546416	180546842
chr3	180546901	180547706
chr3	192872244	192873780
chr3	192873809	192873994
chr3	192874059	192874969
chr3	195341291	195341658
chr3	195341698	195347610
chr3	195408882	195408996
chr3	195570857	195570953
chr3	195571201	195571381
chr3	195572222	195572322
chr4	387619	387723
chr4	387896	388011
chr4	388024	388144
chr4	1389330	1389380
chr4	8176200	8176747
chr4	10256949	10257079
chr4	10257848	10257938
chr4	11372597	11375362
chr4	16361315	16363057
chr4	16363158	16363451
chr4	38829247	38829904
chr4	42030224	42030354
chr4	42031452	42031753
chr4	42031874	42032296
chr4	42032302	42033140
chr4	54953069	54953392
chr4	54953426	54953966
chr4	54953974	54954618
chr4	57186911	57187043
chr4	57187309	57187425
chr4	57458604	57459077
chr4	57459156	57459459
chr4	57459531	57460224
chr4	57460304	57460399
chr4	57460529	57460674
chr4	57460747	57461658
chr4	57461742	57462433
chr4	63682567	63683000
chr4	63683095	63683204
chr4	63683248	63683909
chr4	63683994	63685512
chr4	65296654	65296861
chr4	68581218	68581675
chr4	68581678	68582011
chr4	68582021	68582252
chr4	68582268	68582388
chr4	68582431	68582615
chr4	68582656	68582764
chr4	68582804	68583293
chr4	68583297	68583482
chr4	68583537	68583690
chr4	68583691	68583903
chr4	68904347	68904948
chr4	68926539	68928928
chr4	69416171	69416780
chr4	69431327	69431469
chr4	69528107	69529380
chr4	70383464	70383637
chr4	71249926	71250603
chr4	74809713	74809870
chr4	74809890	74809997
chr4	74810706	74810936
chr4	75481491	75482751
chr4	75483947	75485220
chr4	75485323	75486546
chr4	75487438	75488677
chr4	75489719	75490910
chr4	77264751	77264851
chr4	77265569	77266244
chr4	77266443	77266604
chr4	77266690	77266887
chr4	83196263	83196356
chr4	84398669	84398890
chr4	84398916	84399011
chr4	84399096	84399320
chr4	84399363	84399454
chr4	84399534	84399989
chr4	93103442	93103691
chr4	93103792	93103939
chr4	93104004	93104212
chr4	93104286	93104405
chr4	93104415	93104529
chr4	93104561	93104764
chr4	93104924	93105152
chr4	99877148	99877323
chr4	99877572	99877677
chr4	99877773	99877957
chr4	99878075	99878241
chr4	99943181	99943325
chr4	99943358	99944036
chr4	99944045	99944307
chr4	109336371	109336468
chr4	109336975	109337078
chr4	109338996	109339096
chr4	109339297	109339414
chr4	109340510	109340610
chr4	113276580	113276878
chr4	113277190	113277491
chr4	113277581	113277679
chr4	113377151	113377886
chr4	113377967	113379337
chr4	113614265	113614370
chr4	113614684	113614777
chr4	117115375	117115473
chr4	117115601	117115711
chr4	118495636	118496811
chr4	118497015	118497345
chr4	119388516	119407104
chr4	119407216	119420168
chr4	119420170	119456462
chr4	119457151	119461592
chr4	119461798	119476255
chr4	120254482	120263693
chr4	120264644	120298594
chr4	120298598	120300199
chr4	120314967	120316114
chr4	121012310	121012409
chr4	125384562	125384783
chr4	126644153	126644254
chr4	127484659	127486218
chr4	129076638	129078017
chr4	130056162	130056983
chr4	130060114	130060431
chr4	130060458	130060896
chr4	134045538	134045671
chr4	136486221	136486329
chr4	136487322	136487422
chr4	138221959	138222230
chr4	141562614	141563230
chr4	141563241	141563773
chr4	141564059	141564189
chr4	141564197	141565103
chr4	141565104	141565463
chr4	141565782	141566118
chr4	141566209	141566422
chr4	144832412	144833167
chr4	145061201	145062333
chr4	146296523	146297181
chr4	146297358	146298405
chr4	146544310	146544512
chr4	148379490	148380031
chr4	148380215	148380418
chr4	148427972	148428076
chr4	150711115	150711372
chr4	150711443	150712118
chr4	151949474	151949631
chr4	151949648	151949765
chr4	154579615	154579707
chr4	154579851	154580156
chr4	154580236	154581173
chr4	155644890	155644991
chr4	155645031	155645156
chr4	155645959	155646053
chr4	165836387	165837806
chr4	166468439	166468733
chr4	166469036	166469307
chr4	166469382	166471727
chr4	166471797	166471935
chr4	166472075	166472220
chr4	166472251	166472385
chr4	176415742	176415949
chr4	176416065	176416381
chr4	176416487	176416588
chr4	176416716	176416814
chr4	176416891	176417616
chr4	176417813	176417966
chr4	182826884	182826983
chr4	182827041	182827154
chr4	182827226	182827372
chr4	182827503	182827601
chr4	184243244	184243423
chr4	190946286	190948612
chr5	711742	712691
chr5	767330	767527
chr5	767607	767712
chr5	767761	768074
chr5	768139	768296
chr5	768462	768644
chr5	768717	768863
chr5	769361	769537
chr5	833215	834482
chr5	836977	838106
chr5	839943	841066
chr5	847333	848124
chr5	848181	849062
chr5	1578191	1580912
chr5	1581149	1581525
chr5	1581572	1581781
chr5	1581783	1584852
chr5	1585038	1585422
chr5	1597630	1598884
chr5	1602178	1603430
chr5	5375807	5376144
chr5	5376269	5376551
chr5	5376693	5376839
chr5	7303482	7304562
chr5	14796290	14796393
chr5	14960374	14960476
chr5	14960543	14960776
chr5	14960942	14961051
chr5	14961052	14961514
chr5	14961620	14961721
chr5	14961801	14962232
chr5	17202753	17202932
chr5	17518151	17519257
chr5	17584753	17586173
chr5	17593669	17594827
chr5	17596825	17598282
chr5	23527569	23527781
chr5	24170579	24170660
chr5	24786675	24786780
chr5	25909321	25909622
chr5	25909704	25910081
chr5	25910164	25912343
chr5	26739856	26739955
chr5	26740846	26740938
chr5	26741111	26741221
chr5	37209132	37209774
chr5	37209874	37210520
chr5	37210591	37211957
chr5	37212066	37212224
chr5	37212251	37212370
chr5	37212437	37212585
chr5	37504789	37505077
chr5	39168924	39169392
chr5	39169456	39169788
chr5	39169807	39170476
chr5	39718839	39721120
chr5	39721127	39721791
chr5	43587948	43588077
chr5	51875121	51875301
chr5	51876199	51876299
chr5	51876447	51876605
chr5	59926693	59926804
chr5	60187504	60187600
chr5	60187627	60187845
chr5	60187939	60188460
chr5	60188516	60188633
chr5	60188807	60189047
chr5	60189127	60189347
chr5	63971726	63971816
chr5	68150537	68150657
chr5	68150694	68150916
chr5	68150995	68151087
chr5	68151392	68151545
chr5	68861793	68863136
chr5	68902401	68903598
chr5	69365815	69367830
chr5	69389876	69391495
chr5	69393933	69395272
chr5	69395880	69398033
chr5	69716892	69718214
chr5	69757552	69758730
chr5	70195958	70198397
chr5	70200501	70201660
chr5	70212167	70214597
chr5	70220379	70221634
chr5	70233941	70235442
chr5	70236513	70239332
chr5	70239636	70241215
chr5	70247601	70248925
chr5	70369051	70389824
chr5	81188375	81188702
chr5	82269031	82269210
chr5	82574933	82575145
chr5	82575184	82575284
chr5	82575288	82575900
chr5	82575999	82576115
chr5	82576194	82576351
chr5	90326399	90327347
chr5	92603043	92603383
chr5	92603497	92603697
chr5	92603779	92604065
chr5	92604150	92604401
chr5	96705107	96705275
chr5	96705821	96705938
chr5	96706759	96706862
chr5	108386015	108388177
chr5	109220316	109220461
chr5	109220884	109220984
chr5	110282727	110284432
chr5	110284527	110286603
chr5	112221026	112221135
chr5	112221159	112221584
chr5	112221589	112221690
chr5	112221732	112221991
chr5	112222036	112222200
chr5	112222201	112222388
chr5	112226832	112226937
chr5	112227903	112228120
chr5	112228177	112228801
chr5	114724720	114725731
chr5	114725789	114726081
chr5	114726189	114726939
chr5	114727017	114727223
chr5	114727224	114727977
chr5	122012798	122012920
chr5	126478997	126479101
chr5	127119855	127120002
chr5	127120060	127120604
chr5	127120735	127120961
chr5	127121034	127121141
chr5	127121303	127121397
chr5	127121549	127122123
chr5	127122259	127122527
chr5	127122623	127122896
chr5	138873573	138873850
chr5	140221276	140222559
chr5	140227923	140229556
chr5	140476541	140476754
chr5	140557111	140558768
chr5	140572205	140572497
chr5	140741151	140741872
chr5	140755376	140755992
chr5	140777427	140778372
chr5	150310399	150311271
chr5	168043894	168043996
chr5	171682820	171682961
chr5	171682965	171683065
chr5	175523223	175526459
chr5	175529612	175530879
chr5	175540237	175541557
chr5	175735257	175735381
chr5	175735467	175735559
chr5	175735686	175735819
chr5	175735861	175737016
chr5	176692367	176692653
chr5	176692654	176692790
chr5	176692793	176693050
chr5	176693138	176693282
chr5	176693345	176693445
chr5	176693462	176693556
chr5	177052880	177055016
chr5	177057950	177059961
chr5	177155432	177156623
chr5	177162920	177164206
chr5	177235840	177236938
chr5	177302870	177304255
chr5	177305102	177306537
chr5	177308824	177311297
chr5	177398654	177398908
chr5	177398987	177399097
chr5	177399180	177400282
chr5	177457120	177458319
chr5	178194172	178194385
chr5	178194670	178195239
chr5	178195261	178195366
chr5	178195397	178195638
chr5	178195652	178195776
chr5	178195778	178196014
chr5	178196223	178196704
chr5	178196722	178196840
chr5	178197007	178197259
chr5	178197261	178197386
chr5	178197469	178197860
chr5	178198042	178198228
chr5	178198241	178198553
chr5	178198832	178199396
chr5	178199399	178200088
chr5	178200251	178201098
chr5	178201222	178201417
chr5	178201495	178201629
chr5	178201666	178202037
chr5	178202045	178202916
chr5	178202992	178203140
chr5	178203144	178203248
chr5	178203287	178203387
chr5	178203462	178203689
chr5	178204389	178204779
chr5	178204865	178205099
chr5	178205171	178205803
chr5	178206380	178207265
chr5	178207336	178207742
chr5	178207757	178208009
chr5	178208017	178209643
chr5	178209876	178210051
chr5	178211470	178211630
chr5	178211718	178211860
chr5	178211880	178212706
chr5	178212708	178212853
chr5	178212926	178213231
chr5	178213296	178213456
chr5	178213528	178213645
chr5	178213899	178214310
chr5	178214396	178214932
chr5	178215109	178215904
chr5	178216054	178216359
chr5	178216504	178216910
chr5	178217228	178217352
chr5	178217388	178217605
chr5	178217893	178217997
chr5	178218038	178218439
chr5	178218782	178218917
chr5	178219021	178219397
chr5	178219406	178219971
chr5	178220056	178220160
chr5	178220187	178220775
chr5	178221935	178222515
chr5	178222538	178223056
chr5	178223166	178223699
chr5	178223924	178224111
chr5	178224511	178224871
chr5	178224887	178225016
chr5	178226041	178226133
chr5	178226398	178226521
chr5	178226737	178226859
chr5	178232785	178232995
chr5	178234753	178234858
chr5	178240976	178241106
chr5	178244162	178244266
chr5	178287903	178288169
chr5	178310052	178311202
chr5	180375528	180376338
chr6	3177275	3177882
chr6	3179738	3179976
chr6	3978642	3978974
chr6	3979188	3979600
chr6	6346785	6347219
chr6	6347306	6347407
chr6	6347429	6347530
chr6	6535143	6535272
chr6	6535388	6535722
chr6	6535754	6535858
chr6	6535873	6536201
chr6	6536206	6536369
chr6	10459953	10460675
chr6	10461485	10461589
chr6	10632993	10633098
chr6	24598884	24598990
chr6	26163381	26163473
chr6	26164256	26164568
chr6	26164630	26164812
chr6	26164840	26165047
chr6	26165048	26165306
chr6	26165385	26165578
chr6	26443655	26444766
chr6	27375486	27376010
chr6	27376014	27376775
chr6	27527833	27528027
chr6	27528045	27528347
chr6	27529183	27529315
chr6	27529321	27529415
chr6	27782234	27782479
chr6	27798983	27799337
chr6	28184432	28184670
chr6	28184705	28184809
chr6	28184847	28184975
chr6	28185075	28185198
chr6	28185233	28185599
chr6	28185841	28185943
chr6	28186054	28186340
chr6	28186342	28186475
chr6	28186532	28186690
chr6	28414693	28416584
chr6	29545430	29545527
chr6	29794161	29794270
chr6	29794320	29794688
chr6	29794701	29795567
chr6	29795586	29795723
chr6	29795892	29796029
chr6	30154386	30154674
chr6	30154973	30155072
chr6	30155073	30155208
chr6	30155714	30155846
chr6	30156044	30156179
chr6	30436515	30436625
chr6	31243492	31243656
chr6	31243697	31244983
chr6	31245149	31247172
chr6	31783051	31785731
chr6	31975337	31980589
chr6	31981019	31982041
chr6	31982234	31985289
chr6	31991086	32000726
chr6	32000964	32003626
chr6	32006057	32007807
chr6	32489755	32489852
chr6	32548775	32550024
chr6	32556887	32557993
chr6	33071454	33071879
chr6	33071942	33072041
chr6	33072311	33072413
chr6	33072425	33072611
chr6	33072612	33072981
chr6	33073097	33073277
chr6	33073302	33073410
chr6	33073787	33073954
chr6	33074052	33074248
chr6	33074450	33074664
chr6	33074791	33074884
chr6	36640772	36640876
chr6	39522153	39522243
chr6	39522649	39522790
chr6	41078500	41078600
chr6	41082870	41083027
chr6	41084238	41084429
chr6	41092853	41092963
chr6	41092990	41093106
chr6	41095700	41095834
chr6	41096276	41096389
chr6	41096495	41098025
chr6	52111249	52111360
chr6	52111450	52111577
chr6	52111667	52111787
chr6	52111969	52112243
chr6	52112263	52112453
chr6	52112542	52112660
chr6	52112788	52112892
chr6	54349298	54349849
chr6	54349941	54350541
chr6	54635488	54635610
chr6	54635678	54635829
chr6	54635869	54636932
chr6	56894444	56894591
chr6	56894664	56895077
chr6	56895082	56895786
chr6	56954921	56956366
chr6	66011804	66015521
chr6	66497884	66497993
chr6	66499447	66499719
chr6	66500019	66500154
chr6	66802323	66804069
chr6	66804208	66804310
chr6	66804395	66804839
chr6	73866439	73866604
chr6	73866638	73866890
chr6	73866926	73867233
chr6	73867305	73867604
chr6	73917955	73918064
chr6	73918171	73918267
chr6	73918536	73918988
chr6	73919039	73919141
chr6	73919191	73919585
chr6	73919613	73920087
chr6	73920160	73920328
chr6	73920350	73920449
chr6	73920489	73920804
chr6	74036760	74037023
chr6	80774199	80775443
chr6	80778074	80779414
chr6	90132475	90132585
chr6	93596034	93596174
chr6	93596301	93596422
chr6	93596936	93597034
chr6	93597161	93597416
chr6	93801534	93801644
chr6	93801663	93801778
chr6	93802094	93802592
chr6	99622591	99622691
chr6	99622768	99622976
chr6	99623034	99623149
chr6	99623207	99624355
chr6	104465916	104466112
chr6	104466167	104466338
chr6	111367621	111368040
chr6	111368046	111368262
chr6	111368270	111368365
chr6	117754443	117754553
chr6	129479736	129480418
chr6	130122079	130122188
chr6	130122374	130122510
chr6	130122512	130122698
chr6	130122778	130122885
chr6	130123075	130123168
chr6	132029273	132032221
chr6	133019917	133020407
chr6	133020625	133020742
chr6	139143542	139145639
chr6	147729141	147729233
chr6	147730127	147730281
chr6	150266134	150269233
chr6	158658147	158658280
chr6	159042421	159042523
chr6	159270157	159270339
chr6	160873783	160875059
chr6	166999430	166999790
chr6	167591283	167592666
chr6	167622216	167622316
chr6	167786174	167788554
chr6	167790844	167792129
chr6	167793996	167795433
chr6	169697346	169697455
chr7	2327322	2327429
chr7	2327802	2327893
chr7	5013046	5014012
chr7	5014055	5014643
chr7	5014778	5016614
chr7	5016637	5016732
chr7	5016817	5020936
chr7	5021233	5028279
chr7	5028312	5030437
chr7	5030751	5031505
chr7	5053342	5053472
chr7	5056628	5056727
chr7	5061941	5062196
chr7	5079655	5079798
chr7	5962397	5964227
chr7	5976802	5979036
chr7	5982374	5985472
chr7	5996962	5999367
chr7	6776145	6777277
chr7	6785433	6785999
chr7	6786514	6787135
chr7	6790228	6791592
chr7	6796653	6800623
chr7	6803025	6804279
chr7	6807529	6809075
chr7	6810484	6811975
chr7	6812288	6813751
chr7	6815345	6816903
chr7	6828582	6830068
chr7	6830905	6832260
chr7	6835760	6836935
chr7	6837514	6839460
chr7	6844075	6846380
chr7	6851048	6853302
chr7	6853879	6855032
chr7	6858737	6860075
chr7	6862432	6864963
chr7	7948748	7949527
chr7	7949685	7950072
chr7	9766748	9766862
chr7	22532028	22532658
chr7	22533143	22533723
chr7	23624320	23624957
chr7	23625118	23625622
chr7	23625817	23626154
chr7	23659198	23659322
chr7	23659415	23659518
chr7	23659705	23660055
chr7	23660127	23660314
chr7	23660332	23660917
chr7	23660928	23661231
chr7	23661254	23661419
chr7	23661461	23661709
chr7	23661721	23662083
chr7	23761292	23761411
chr7	29671549	29671678
chr7	29696621	29696739
chr7	32656790	32657188
chr7	32657214	32657393
chr7	32657407	32657650
chr7	32657657	32657943
chr7	32657949	32658218
chr7	32658247	32658566
chr7	32658593	32658739
chr7	32658757	32658932
chr7	32659041	32659503
chr7	32659529	32659756
chr7	32659886	32660209
chr7	32660232	32660367
chr7	32660377	32661268
chr7	32661356	32661631
chr7	32661861	32662031
chr7	32662049	32662589
chr7	32662604	32662734
chr7	32662743	32663061
chr7	32663094	32663215
chr7	32663317	32663712
chr7	32663733	32663892
chr7	32664897	32665084
chr7	32665098	32665337
chr7	32665341	32665775
chr7	32666056	32666417
chr7	32666441	32667180
chr7	32667246	32667879
chr7	32667889	32668517
chr7	32668523	32668627
chr7	32668727	32668831
chr7	32668893	32669019
chr7	32669027	32669402
chr7	32669499	32669671
chr7	32669684	32669835
chr7	32669977	32670094
chr7	32670113	32670228
chr7	32670249	32670385
chr7	32670397	32670663
chr7	32671060	32671440
chr7	32671453	32671660
chr7	32671682	32672035
chr7	32672132	32672590
chr7	32672599	32672719
chr7	32672731	32672868
chr7	32672884	32673024
chr7	32673105	32673579
chr7	32673616	32674112
chr7	32674137	32674585
chr7	32674749	32674945
chr7	32675139	32675268
chr7	32675290	32675513
chr7	32675528	32675633
chr7	32675728	32675934
chr7	32675947	32676221
chr7	32676303	32676421
chr7	32676520	32676654
chr7	32676737	32677033
chr7	32677049	32677234
chr7	32677354	32677484
chr7	32677607	32678128
chr7	32678236	32678531
chr7	32678546	32678849
chr7	32678960	32679068
chr7	32679094	32679225
chr7	32679557	32679703
chr7	32679723	32679833
chr7	32679986	32680289
chr7	32680649	32680890
chr7	32680907	32681077
chr7	32681177	32681384
chr7	32681471	32681938
chr7	32681947	32682359
chr7	32682367	32682573
chr7	32682707	32683028
chr7	32683040	32683171
chr7	32683300	32683420
chr7	32683444	32683661
chr7	32683773	32683975
chr7	32684094	32684257
chr7	32684277	32684416
chr7	32684429	32684803
chr7	32684901	32685276
chr7	32685309	32685414
chr7	32685427	32685585
chr7	32685593	32685815
chr7	32685919	32686032
chr7	32686058	32686197
chr7	32686255	32686403
chr7	32686439	32686573
chr7	32686604	32687006
chr7	32687014	32687305
chr7	32687334	32687748
chr7	32687971	32688154
chr7	32688170	32688279
chr7	32688309	32688504
chr7	32688557	32688748
chr7	32688779	32688890
chr7	32689025	32689124
chr7	32689152	32689468
chr7	32689508	32689610
chr7	32689634	32689768
chr7	32689891	32690511
chr7	32690521	32690691
chr7	32690955	32691345
chr7	32691353	32691454
chr7	32691475	32692002
chr7	32692082	32692356
chr7	32692902	32693002
chr7	32693396	32693693
chr7	32693716	32693830
chr7	32693858	32693958
chr7	32693969	32694180
chr7	32694192	32694468
chr7	32694618	32694800
chr7	32694900	32695009
chr7	32695022	32695204
chr7	32695246	32695355
chr7	32695853	32695955
chr7	32696030	32696131
chr7	32696291	32696435
chr7	32696454	32696777
chr7	32696786	32696958
chr7	32696978	32697082
chr7	32697095	32697244
chr7	32697776	32697947
chr7	32697990	32698157
chr7	32698178	32698970
chr7	32698994	32699274
chr7	32699334	32699472
chr7	32699913	32700085
chr7	32700217	32700451
chr7	32700626	32700750
chr7	32701048	32701348
chr7	32701361	32701601
chr7	32701683	32701830
chr7	32701930	32702181
chr7	32702206	32702413
chr7	32702438	32702549
chr7	32702737	32702866
chr7	32702875	32703055
chr7	32703228	32703466
chr7	32703535	32703980
chr7	32704073	32704469
chr7	32704490	32705762
chr7	32705866	32705971
chr7	32706326	32706537
chr7	32706544	32706816
chr7	32706826	32706941
chr7	32706985	32707140
chr7	32707254	32707511
chr7	32707526	32708000
chr7	32708016	32708142
chr7	32708256	32708378
chr7	32708403	32708669
chr7	32708677	32709192
chr7	32709208	32709483
chr7	32709501	32709620
chr7	32709682	32709837
chr7	32709860	32710219
chr7	32710313	32710583
chr7	32710892	32711161
chr7	32711420	32711537
chr7	32711575	32711735
chr7	32711825	32712018
chr7	32712039	32712195
chr7	32712207	32712335
chr7	32712386	32712662
chr7	32712720	32712831
chr7	32712849	32712962
chr7	32713532	32713924
chr7	32713944	32714197
chr7	32714259	32714371
chr7	32714511	32714626
chr7	32714690	32714788
chr7	32714818	32714979
chr7	32715007	32715491
chr7	32715662	32715766
chr7	32715823	32715922
chr7	32715939	32716084
chr7	32716102	32716234
chr7	32716650	32716756
chr7	32716869	32717122
chr7	32717216	32717399
chr7	32717416	32717522
chr7	32717620	32718147
chr7	32718222	32718513
chr7	32718530	32718773
chr7	32718842	32718943
chr7	32718982	32719245
chr7	32719333	32719622
chr7	32719670	32719880
chr7	32719893	32720101
chr7	32720509	32720645
chr7	32720706	32720892
chr7	32860551	32861712
chr7	32878008	32878191
chr7	32956141	32956511
chr7	32956592	32957512
chr7	32957663	32957835
chr7	32957866	32958049
chr7	32960941	32961081
chr7	32962210	32962306
chr7	32965110	32965251
chr7	32968022	32968601
chr7	32968662	32968779
chr7	32969132	32969373
chr7	32969394	32969779
chr7	32970921	32971058
chr7	32981472	32981806
chr7	32982454	32982576
chr7	34789588	34789944
chr7	34789949	34790403
chr7	34790495	34791500
chr7	36011659	36012782
chr7	37624884	37624995
chr7	38383630	38386101
chr7	40191179	40191310
chr7	40192393	40192561
chr7	40192733	40192947
chr7	40193292	40193574
chr7	40193666	40193816
chr7	43958245	43958621
chr7	43958769	43958899
chr7	43958988	43959857
chr7	44046776	44047887
chr7	44053742	44054758
chr7	45431222	45431319
chr7	45431707	45431829
chr7	45789298	45790545
chr7	45790966	45791130
chr7	45791314	45792345
chr7	45792356	45792716
chr7	45793013	45794547
chr7	46038438	46039326
chr7	46039489	46039705
chr7	46039788	46039914
chr7	46039990	46040401
chr7	46820791	46820896
chr7	46822099	46822477
chr7	46822550	46823018
chr7	48885556	48887846
chr7	48943353	48943444
chr7	49981852	49981952
chr7	49982165	49982256
chr7	49982733	49982869
chr7	49983012	49983227
chr7	49983468	49983793
chr7	51326395	51326533
chr7	51326539	51326695
chr7	51666981	51667678
chr7	53929936	53930741
chr7	55747950	55758642
chr7	55758709	55769707
chr7	55769717	55774661
chr7	55774689	55777477
chr7	55777729	55778892
chr7	55778896	55781863
chr7	55831874	55831969
chr7	55832925	55833071
chr7	55834898	55834998
chr7	55836429	55836636
chr7	55838446	55838552
chr7	55838802	55838915
chr7	55838929	55839056
chr7	55839858	55840062
chr7	55840816	55841981
chr7	56295334	56295689
chr7	56570979	56571123
chr7	62579399	62579746
chr7	62579757	62579863
chr7	62579984	62580098
chr7	62580130	62580254
chr7	62580361	62580728
chr7	62580749	62580981
chr7	62581131	62581264
chr7	62583439	62583628
chr7	62583646	62583845
chr7	62583847	62584032
chr7	62584177	62584279
chr7	62584401	62584592
chr7	62584755	62584878
chr7	62585018	62585148
chr7	62585188	62585408
chr7	62585497	62585620
chr7	62585672	62585993
chr7	62586361	62586848
chr7	62587144	62587245
chr7	62587364	62587524
chr7	62587569	62587794
chr7	62587826	62588066
chr7	62588174	62588936
chr7	62589333	62589652
chr7	62589820	62589985
chr7	62595239	62595702
chr7	62595727	62596037
chr7	62596105	62596620
chr7	62596636	62596987
chr7	62597347	62597663
chr7	62597907	62598262
chr7	62598410	62598544
chr7	62598556	62599121
chr7	62599139	62599258
chr7	62599337	62599586
chr7	62599699	62599851
chr7	62600012	62600120
chr7	62600324	62600482
chr7	62600498	62600751
chr7	62600904	62601055
chr7	62601235	62601530
chr7	62601557	62601703
chr7	62601925	62602039
chr7	62602233	62602355
chr7	62602496	62602825
chr7	62602904	62603371
chr7	62603488	62603648
chr7	62603696	62604072
chr7	62604188	62604307
chr7	62604707	62604832
chr7	62605349	62605546
chr7	62605563	62605667
chr7	62605780	62606014
chr7	62606114	62606350
chr7	62606358	62606461
chr7	62607010	62607198
chr7	62607210	62607426
chr7	62607575	62607715
chr7	62607782	62608040
chr7	62608157	62608672
chr7	62608680	62608870
chr7	62608879	62609195
chr7	62694223	62694542
chr7	62751468	62753684
chr7	62915226	62917490
chr7	63353712	63353880
chr7	63353964	63354408
chr7	63354461	63356019
chr7	63370653	63370787
chr7	63575479	63575614
chr7	63575832	63575956
chr7	63576118	63576257
chr7	63576459	63576598
chr7	63929297	63929387
chr7	63929675	63929821
chr7	63929966	63930465
chr7	63930528	63930643
chr7	63930655	63930771
chr7	63930833	63930983
chr7	63931378	63931507
chr7	63931541	63931846
chr7	63931847	63931953
chr7	64674182	64674927
chr7	64674937	64676640
chr7	65082423	65082983
chr7	65171395	65171566
chr7	65468393	65469667
chr7	65888028	65888136
chr7	66277885	66278041
chr7	66279363	66279500
chr7	66279508	66279612
chr7	66279958	66280050
chr7	66280081	66280594
chr7	66280634	66281803
chr7	66281847	66283445
chr7	66283489	66283844
chr7	66284196	66285416
chr7	66285704	66286229
chr7	66286234	66288118
chr7	66288124	66288576
chr7	66288577	66288674
chr7	66288847	66289963
chr7	66290123	66291094
chr7	66291418	66291524
chr7	66291551	66291677
chr7	66291714	66291818
chr7	66291881	66292609
chr7	66292675	66292963
chr7	66293307	66294731
chr7	66294732	66295937
chr7	66295972	66297258
chr7	66297266	66299324
chr7	66305691	66305792
chr7	66309132	66309314
chr7	66755205	66755370
chr7	71568432	71568535
chr7	72040066	72041255
chr7	72178134	72179305
chr7	72241903	72243051
chr7	72299035	72303856
chr7	72303894	72308280
chr7	72361023	72362194
chr7	72417119	72417788
chr7	72423219	72426094
chr7	72568351	72569443
chr7	72597969	72599355
chr7	72606354	72607837
chr7	72613206	72615257
chr7	72617957	72619341
[truncated: 4,333 more rows]
