# Supplementary material for: Systematic analysis of paralogous regions in 41,755 exomes uncovers clinically relevant variation
Source: Research Square preprint supplement (doi:10.21203/rs.3.rs-2302399/v1), 2022-11-29
Supplement: Supplementary file 16 [file STable23.xlsx]

## Sheet: STable23
ToMapOnCoord	OtherCoord
chr1:110223795-110225119	chr1:110242240-110243563
chr7:35241752-35242924	chr12:64078234-64079404
chr7:35942291-35943402	chr7:36011659-36012782
chr7:48964021-48966063	chr7:48885563-48887837
chr7:55540560-55540685	chr1:148193719-148193844
chr7:5923007-5924163	chr7:97615828-97616980
chr7:5925182-5926329	chr7:97613657-97614811
chr7:5939317-5941851	chr7:6862432-6864963
chr7:5944221-5945557	chr7:6858737-6860075
chr1:207714934-207716168	chr1:207733492-207734728
chr7:5949103-5950283	chr7:6853879-6855032
chr7:5950856-5953119	chr7:6851048-6853302
chr7:5957786-5960087	chr7:6844075-6846380
chr7:5964710-5966660	chr7:6837514-6839460
chr7:5967287-5968465	chr7:6837514-6839460
chr7:5971783-5973136	chr7:6830905-6832260
chr7:5973971-5975455	chr7:6828582-6830068
chr7:5987122-5988682	chr7:6815345-6816903
chr7:5990270-5991741	chr7:6812288-6813751
chr7:5992053-5993543	chr7:6810484-6811975
chr1:21808078-21808305	chr1:21752676-21752907
chr7:5994961-5996502	chr7:6807529-6809075
chr7:5999775-6001025	chr7:6803025-6804279
chr7:6003433-6007403	chr7:6796653-6800623
chr7:6012460-6013822	chr7:6790228-6791592
chr7:6016919-6017546	chr7:6786514-6787135
chr7:6018044-6018627	chr7:6785433-6785999
chr7:6026683-6027810	chr7:6776145-6777277
chr7:65413034-65414311	chr7:65468393-65469667
chr7:66514428-66515574	chr7:72241903-72243051
chr1:219782296-219786014	chr6:66011804-66015521
chr7:66562977-66564148	chr7:72178134-72179305
chr7:66702743-66703933	chr7:72040066-72041255
chr7:6804670-6807083	chr7:5996962-5999367
chr7:6818579-6821686	chr7:5982374-5985472
chr7:6825000-6827241	chr7:5976802-5979036
chr7:6839947-6841780	chr7:5962397-5964227
chr7:72410578-72411471	chr7:72708945-72709839
chr7:72413517-72413663	chr7:72711890-72712036
chr7:72418269-72419889	chr7:75045010-75046585
chr7:72429903-72432673	chr7:75032230-75034999
chr1:22303952-22305092	chr1:22328577-22329718
chr7:72435730-72437137	chr7:75027764-75029155
chr7:72742195-72742861	chr7:75024132-75024791
chr1:22312857-22314078	chr1:22336031-22337252
chr7:74250827-74252189	chr7:74524067-74525432
chr7:74431179-74434906	chr7:74811501-74815233
chr7:74435352-74436724	chr7:74809679-74811056
chr7:74441552-74443271	chr7:74803133-74804855
chr7:74456511-74457793	chr7:74788615-74789901
chr7:74466263-74467545	chr7:74778870-74780147
chr7:74469537-74472378	chr7:74774039-74776874
chr7:74473782-74475206	chr7:74771206-74772631
chr7:74476359-74477789	chr7:74768631-74770053
chr7:74478420-74479757	chr7:74766660-74767995
chr1:22315158-22316429	chr1:22338347-22339613
chr7:74479769-74481133	chr7:74765285-74766646
chr7:74807000-74808492	chr7:74437918-74439407
chr7:75038812-75041687	chr7:72423219-72426094
chr7:75050942-75051054	chr7:72712174-72712286
chr7:75054639-75055974	chr7:72707255-72708596
chr7:75070395-75072283	chr7:76255009-76256890
chr7:76069178-76070361	chr7:76240341-76241526
chr7:76070644-76072017	chr7:76238675-76240046
chr7:76247071-76247888	chr7:76063087-76063897
chr7:76796963-76797151	chr7:102343754-102343941
chr7:89789858-89790384	chr7:22533189-22533715
chr7:89790917-89791553	chr7:22532028-22532658
chr8:144940231-144940267	chr8:144942205-144942241
chr8:145192845-145194933	chr8:145438053-145440142
chr8:145293167-145296553	chr8:145462218-145465598
chr8:145296652-145300766	chr8:145465703-145469817
chr8:145301663-145303143	chr8:145470718-145472192
chr8:145303214-145304457	chr8:145472267-145473516
chr8:145304580-145305882	chr8:145473637-145474933
chr8:145309225-145311173	chr8:145478275-145480230
chr8:145314233-145320540	chr8:145483281-145489623
chr8:145321285-145323643	chr8:145490368-145492728
chr8:145499673-145500913	chr8:145330561-145331798
chr8:21631805-21633179	gi|89028417|ref|NT_113907.1|:30414-31788
chr1:24293769-24294856	gi|88944410|ref|NT_113878.1|:37104-38181
chr8:21639559-21642509	gi|89028417|ref|NT_113907.1|:19560-22509
chr8:21645104-21646437	gi|89028417|ref|NT_113907.1|:15629-16963
chr8:48191891-48193236	gi|89028421|ref|NT_113909.1|:26275-27619
chr8:48196062-48197289	gi|89028421|ref|NT_113909.1|:22220-23445
chr8:48202963-48204359	gi|89028421|ref|NT_113909.1|:15150-16547
chr8:48205867-48207201	gi|89028421|ref|NT_113909.1|:12308-13639
chr8:7271868-7273279	chr8:7753341-7754742
chr8:7273650-7274964	chr8:7751620-7752932
chr8:72967679-72968322	chr8:73142288-73142934
chr8:7304995-7307449	chr8:7719139-7721599
chr1:111860663-111860804	chr1:111825964-111826104
chr8:7307585-7308928	chr8:7717660-7719002
chr8:7309055-7310554	chr8:7716039-7717533
chr8:7327177-7328612	chr8:7697979-7699413
chr8:7331882-7333202	chr8:7693392-7694716
chr8:7339486-7340923	chr8:7685679-7687117
chr8:7346247-7347736	chr8:7678868-7680354
chr8:7352815-7354214	chr8:7672390-7673795
chr8:7365902-7367426	chr8:7668651-7670176
chr8:7396622-7400122	chr8:7635966-7639462
chr8:7680364-7683345	chr8:7343251-7346235
chr1:24300911-24302236	gi|88944410|ref|NT_113878.1|:44257-45578
chr8:7704777-7708320	chr8:7318273-7321816
chr8:7738182-7740722	chr8:7285872-7288409
chr9:107360886-107362186	chr9:107367100-107368400
chr9:116029521-116029711	chr7:129049937-129050121
chr9:117088045-117089226	chr9:117094822-117096006
chr9:117091562-117093426	chr9:117084788-117086652
chr9:125486199-125487406	chr9:125512060-125513284
chr9:136083418-136085233	chr9:138437377-138439192
chr9:136418890-136421586	gi|89030144|ref|NT_113911.1|:1976-4671
chr1:24304677-24305932	gi|88944410|ref|NT_113878.1|:48023-49275
chr9:136425662-136427019	gi|89030144|ref|NT_113911.1|:8747-10107
chr9:136431372-136432798	gi|89030144|ref|NT_113911.1|:13642-15070
chr9:136432804-136436283	gi|89030144|ref|NT_113911.1|:15072-18549
chr9:136438319-136440588	gi|89030144|ref|NT_113911.1|:20590-22857
chr9:136443783-136446056	gi|89030144|ref|NT_113911.1|:26056-28327
chr9:138413701-138414261	chr9:136184962-136185540
chr9:138940930-138942921	chr1:223741421-223743415
chr9:19058188-19058992	chr7:53929936-53930741
chr9:21440047-21441561	chr9:21366951-21368465
chr1:24306110-24307488	gi|88944410|ref|NT_113878.1|:49438-50819
chr9:33532857-33534055	chr9:38610699-38611897
chr9:33797394-33798477	chr7:142470111-142471197
chr9:34723804-34726913	chr9:34832867-34835976
chr9:43875523-43876537	chr9:65617133-65618148
chr9:5303460-5304871	chr9:5338620-5340029
chr9:69659667-69660859	chr9:67297710-67298903
chr9:84543105-84543888	chr9:84558177-84558956
chr9:84544190-84544584	chr9:84559262-84559656
chr9:84559883-84560206	chr9:84544811-84545132
chr9:84560253-84562537	chr9:84545162-84547446
chr9:84562599-84562800	chr9:84547505-84547705
chr9:86451456-86452847	chr9:88400564-88401955
chr9:86456704-86457830	chr9:88395600-88396729
chr9:86473459-86474577	chr9:88379334-88380450
chr9:86482095-86483179	chr9:88370585-88371666
chr9:86494613-86495776	chr9:88463894-88465056
chr9:94870526-94871651	chr9:85042583-85043701
chr9:96277254-96279087	chr9:96097117-96098956
chr9:97086938-97088408	chr9:99693812-99695282
chr9:97090384-97091607	chr9:99690607-99691828
chr9:97190943-97192123	chr9:99720526-99721706
chr9:97200450-97201098	chr9:99711548-99712196
chr9:99700077-99702488	chr9:97079691-97082098
chrMT:4074-5111	chr1:564633-565652
chrX:100870350-100871422	chrX:100852335-100853400
chrX:101470174-101471592	chrX:101725413-101726835
chrX:101472294-101473603	chrX:101723407-101724718
chrX:101475863-101482276	chrX:101714746-101721158
chrX:101561301-101562808	chrX:101634186-101635695
chrX:101575929-101579433	chrX:101617514-101621021
chrX:101614857-101616436	chrX:101580509-101582093
chrX:102191897-102193186	chrX:102754745-102756034
chrX:119205787-119207427	chrX:119296747-119298386
chrX:1314348-1315571	chrY:1264342-1265569
chrX:1316835-1318191	chrY:1266832-1268194
chrX:1320704-1322011	chrY:1270708-1272010
chrX:1324697-1326102	chrY:1274702-1276099
chrX:1327100-1328392	chrY:1277104-1278398
chrX:1330872-1332136	chrY:1280871-1282137
chrX:134290218-134292087	chrX:134348314-134350181
chrX:1400975-1402282	chrY:1350974-1352284
chrX:1404142-1405429	chrY:1354144-1355427
chrX:1406758-1408375	chrY:1356758-1358376
chrX:1408611-1410017	chrY:1358610-1360012
chrX:1412667-1415084	chrY:1362664-1365079
chrX:1418830-1420911	chrY:1368831-1370908
chrX:1422204-1423528	chrY:1372209-1373526
chrX:1423748-1425239	chrY:1373749-1375234
chrX:1427706-1429045	chrY:1377707-1379044
chrX:145890635-145892417	chrX:145895132-145896912
chrX:1460093-1461371	chrY:1410090-1411371
chrX:1463642-1464891	chrY:1413643-1414891
chrX:1466724-1468055	chrY:1416724-1418058
chrX:1470420-1471953	chrY:1420411-1421958
chrX:1474530-1475772	chrY:1424530-1425771
chrX:1477119-1478359	chrY:1427120-1428351
chrX:1483409-1484688	chrY:1433410-1434686
chr1:117150785-117150877	gi|89036899|ref|NT_113923.1|:130425-130517
chrX:148630348-148631479	chrX:149097780-149098909
chrX:148663239-148665383	chrX:148867328-148869468
chrX:148855648-148859092	chrX:148673608-148677049
chrX:149100248-149102484	chrX:148626779-148629020
chrX:1496985-1498248	chrY:1446987-1448250
chrX:1499275-1500651	chrY:1449274-1450648
chrX:1500749-1501951	chrY:1450745-1451954
chrX:1504927-1506908	chrY:1454930-1456909
chrX:1507535-1509144	chrY:1457532-1459141
chrX:1510257-1511419	chrY:1460265-1461424
chrX:1521582-1522971	chrY:1471581-1472971
chrX:1530989-1532332	chrY:1480987-1482337
chrX:153452848-153454043	chrX:153489971-153491160
chrX:153454929-153456261	chrX:153492048-153493379
chrX:153456587-153457991	chrX:153493707-153495110
chrX:153458319-153459652	chrX:153495430-153496771
chrX:153629107-153629179	chr5:168043913-168043985
chrX:1536299-1537584	chrY:1486300-1487580
chrX:153845633-153849047	chrX:153811888-153815306
chrX:1539943-1541361	chrY:1489944-1491363
chrX:1543915-1545167	chrY:1493918-1495167
chrX:1546033-1547560	chrY:1496035-1497562
chrX:154720648-154722876	chrX:154577345-154579571
chrX:155002951-155005017	chrY:59105959-59108024
chrX:1550572-1551880	chrY:1500570-1501878
chrX:155118500-155119850	chrY:59221506-59222859
chrX:155124628-155125958	chrY:59227631-59228964
chrX:155127166-155128528	chrY:59230168-59231538
chrX:155129566-155130881	chrY:59232573-59233887
chrX:155148907-155150138	chrY:59251913-59253142
chrX:155168668-155170090	chrY:59271669-59273095
chrX:155170982-155172461	chrY:59273990-59275468
chrX:155226740-155228074	chrY:59329746-59331077
chr1:247013196-247014670	chr2:162358081-162359553
chrX:155236692-155237850	chrY:59339702-59340861
chrX:155239265-155240339	chrY:59342264-59343348
chrX:1553346-1555234	chrY:1503347-1505233
chrX:1557317-1558682	chrY:1507314-1508681
chrX:1560553-1561780	chrY:1510547-1511777
chrX:1571138-1572223	chrY:1521144-1522214
chrX:1583886-1585915	chrY:1533885-1535914
chrX:1711757-1713698	chrY:1661754-1663701
chr1:247079478-247079606	chr2:162363846-162363979
chrX:1713727-1714978	chrY:1663728-1664968
chrX:1717578-1720889	chrY:1667584-1670893
chrX:1733473-1734821	chrY:1683469-1684818
chrX:1741514-1743860	chrY:1691511-1693858
chrX:1746016-1747283	chrY:1696018-1697279
chrX:1748078-1749515	chrY:1698078-1699513
chrX:1751403-1752840	chrY:1701401-1702840
chrX:1754667-1756029	chrY:1704665-1706028
chrX:1761133-1762466	chrY:1711129-1712465
chrX:200320-201533	chrY:150322-151531
chr1:247287151-247287222	chr1:247337100-247337171
chrX:204735-206094	chrY:154737-156093
chrX:206733-208843	chrY:156735-158842
chrX:209258-210402	chrY:159261-160395
chrX:2138467-2139854	chrY:2088468-2089858
chrX:215123-216617	chrY:165124-166617
chrX:2160460-2161861	chrY:2110462-2111859
chrX:2184138-2185624	chrY:2134142-2135625
chrX:2208898-2210248	chrY:2158898-2160249
chrX:221200-222472	chrY:171198-172474
chrX:223506-224683	chrY:173508-174682
chr1:247334534-247335820	chr1:247289225-247290519
chrX:227586-230153	chrY:177597-180151
chrX:230247-231507	chrY:180247-181509
chrX:2326213-2327421	chrY:2276212-2277418
chrX:2342659-2343956	chrY:2292667-2293957
chrX:2406126-2409318	chrY:2356121-2359319
chrX:26179179-26180338	chrX:26212427-26213583
chrX:2631890-2633174	chrY:2581893-2583178
chrX:2635027-2636368	chrY:2585026-2586366
chrX:2637020-2639159	chrY:2587022-2589158
chr1:248112125-248113314	chr1:248223963-248225114
chrX:2640035-2642044	chrY:2590034-2592044
chrX:2650756-2651999	chrY:2600781-2602001
chrX:2655480-2656881	chrY:2605480-2606879
chrX:2658171-2659491	chrY:2608174-2609488
chrX:2669694-2670871	chrY:2619696-2620868
chrX:2687918-2689307	chrY:2637913-2639306
chrX:2692107-2693512	chrY:2642104-2643508
chrX:294646-295856	chrY:244644-245858
chrX:298845-300243	chrY:248848-250243
chr1:248615503-248617693	chr1:248800964-248803146
chrX:300923-303302	chrY:250924-253303
chrX:305394-308701	chrY:255388-258694
chrX:321528-322910	chrY:271538-272912
chrX:346548-347882	chrY:296543-297899
chrX:46360154-46360460	chrX:46332494-46332799
chrX:47866610-47869663	chrX:47989477-47992536
chrX:48242856-48245499	chrX:48268807-48271455
chrX:48265184-48265640	chrX:48248669-48249124
chr1:11982859-11983029	chr16:15082299-15082472
chr1:248636147-248638110	chr1:248736604-248738562
chrX:51238296-51239522	chrX:51075593-51076815
chrX:51804453-51811888	chrX:51928398-51935836
chrX:52112542-52114421	chrX:52384752-52386631
chrX:52115055-52116440	chrX:52382738-52384118
chrX:52118057-52119285	chrX:52379887-52381116
chrX:52729286-52729730	chrX:52786829-52787283
chrX:52781081-52783674	chrX:52732878-52735476
chrX:52935601-52937477	chrX:52976572-52978447
chrX:55102439-55103551	chrX:55116384-55117481
chrX:55104560-55105872	chrX:55118493-55119803
chr1:248651323-248653528	chr1:248721152-248723357
chrX:57145875-57147680	chrX:57161843-57163650
chrX:57619513-57621172	chrX:57934175-57935834
chrX:5810853-5812013	chrY:16951990-16953144
chrX:5820896-5822189	chrY:16941327-16942619
chrX:591072-593306	chrY:541076-543303
chrX:594780-596118	chrY:544780-546121
chrX:600957-602407	chrY:550955-552408
chrX:604659-605784	chrY:554641-555796
chrX:6451678-6452351	chrX:8433677-8434347
chrX:70811771-70812947	chrX:70813976-70815155
chr1:248812947-248814673	chr1:248604008-248605717
chrX:70934516-70940317	chrX:70980954-70986758
chrX:72001135-72002950	chrX:72157527-72159349
chrX:72026769-72028486	chrX:72132015-72133726
chrX:72064264-72068836	chrX:72091658-72096231
chrX:72222910-72224654	chrX:72298052-72299802
chrX:89176618-89177995	chrY:3446822-3448181
chrX:91131466-91134248	chrY:4965942-4968724
chrY:16168114-16169328	chrY:16097165-16098372
chrY:20749824-20751132	chrY:20893040-20894345
chr1:25629231-25630391	chr1:25715025-25716183
chrY:20930837-20932765	chrY:20711410-20713345
chrY:4924732-4925956	chrX:91090273-91091501
chrY:59335005-59338692	chrX:155231997-155235684
chr1:25688932-25689110	chr1:25655322-25655498
chr1:25701365-25702552	chr1:25642866-25644035
chr1:39986273-39987665	chr1:40229871-40231265
chr1:40239340-40241264	chr1:39976291-39978208
chr1:11985436-11985579	chr16:15083159-15083302
chr1:47399189-47401870	chr1:47608408-47611069
chr1:47545580-47547029	chr1:47352230-47353681
chr1:47549754-47551307	chr1:47347953-47349496
chr1:64867-66500	chr19:106453-108087
chr1:9640115-9640273	chr11:49455249-49455402
chr10:120895992-120896349	chrX:129630040-129630396
chr10:124339727-124344553	chr10:124352430-124357257
chr1:120547558-120548880	chr1:145272515-145273839
chr10:17793650-17795139	chr10:18040619-18042114
chr10:17812715-17813882	chr10:18059701-18060861
chr10:17817422-17818773	chr10:18064412-18065767
chr10:17837320-17839125	chr10:18084307-18086114
chr10:17850826-17852131	chr10:18097821-18099122
chr10:17864490-17866075	chr10:18111457-18113045
chr10:17868922-17870332	chr10:18115876-18117282
chr10:17875106-17876228	chr10:18122060-18123179
chr10:17882118-17883330	chr10:18129046-18130259
chr1:120610955-120612231	chr1:145209194-145210476
chr10:17886625-17888107	chr10:18133552-18135036
chr10:17894393-17895747	chr10:18141313-18142660
chr10:17897752-17898967	chr10:18144683-18145884
chr10:17902848-17904103	chr10:18149766-18151023
chr10:17904983-17906182	chr10:18151907-18153094
chr10:17908018-17909365	chr10:18154937-18156284
chr10:17911645-17914717	chr10:18158559-18161629
chr10:17915158-17917853	chr10:18162076-18164767
chr10:17919306-17920617	chr10:18166226-18167531
chr10:17921082-17923784	chr10:18168001-18170701
chr1:120929566-120930711	chr1:149759500-149760644
chr10:17926705-17927988	chr10:18173623-18174907
chr10:17935625-17936894	chr10:18182539-18183822
chr10:17939427-17940919	chr10:18186342-18187839
chr10:17942173-17944709	chr10:18189091-18191625
chr10:17948259-17950177	chr10:18195171-18197086
chr10:17950792-17953104	chr10:18197705-18200013
chr10:24873538-24874781	chr6:80774199-80775443
chr10:24909025-24910364	chr6:80778074-80779414
chr1:12907259-12908767	chr1:13182989-13184494
chr10:29580257-29581428	chr10:30915211-30916386
chr10:37457924-37459219	chr10:37469720-37471014
chr10:37462091-37463388	chr10:37473889-37475192
chr10:37464427-37465806	chr10:37476223-37477605
chr10:46551080-46553208	chr10:48737999-48740125
chr10:47164284-47165633	chr10:48263716-48265067
chr10:47902503-47903786	chr10:51846385-51847661
chr10:47941370-47942531	chr10:51885230-51886385
chr10:48012872-48014183	chr10:51958166-51959473
chr10:48016671-48021156	chr10:51961968-51966448
chr10:48024870-48026139	chr10:51970157-51971419
chr10:48026809-48028136	chr10:51972092-51973418
chr10:48028650-48029888	chr10:51973937-51975180
chr10:48032401-48033607	chr10:51977691-51978888
chr1:104162932-104163727	chr1:104257134-104257932
chr1:13218912-13219040	chr1:13142648-13142776
chr10:48047052-48049602	chr10:51992343-51994893
chr10:48049750-48051140	chr10:51995040-51996434
chr10:48054449-48055689	chr10:51999741-52000976
chr10:5017379-5018848	chr10:5033299-5034766
chr10:5019386-5020497	chr10:5031624-5032734
chr10:5040759-5042080	chr10:5009891-5011209
chr10:5045034-5046490	chr10:5005173-5006627
chr10:51370223-51372161	chr10:51622590-51624534
chr10:51373797-51375124	chr10:51619631-51620956
chr10:5144424-5145031	chr10:5037321-5037930
chr10:51605793-51607796	chr10:51386957-51388958
chr10:51609703-51611766	chr10:51382982-51385049
chr10:51612214-51613961	chr10:51380788-51382535
chr10:81271839-81273147	chr10:82006697-82008005
chr10:81371029-81372222	chr10:81318591-81319790
chr10:81372979-81374221	chr10:81316613-81317853
chr10:81472330-81472954	chr10:81610451-81611075
chr10:81607995-81609148	chr10:81469828-81471012
chr10:88985506-88986610	chr10:89117719-89118834
chr10:89725049-89725253	chr9:33675414-33675616
chr11:1017677-1017956	chr11:1018184-1018463
chr11:117076182-117080316	chr11:117005697-117009832
chr11:123886116-123887104	chr11:123893527-123894483
chr11:124251897-124253754	chr11:124265905-124267762
chr11:1268729-1270628	chr11:1264955-1266853
chr11:130103936-130104117	chr13:77166526-77166710
chr11:131781362-131781544	chr11:132812818-132812999
chr11:18267212-18267897	chr11:18290440-18291120
chr1:13450234-13451080	chr1:13671087-13671938
chr11:308407-309081	chr11:319926-320593
chr11:4607931-4608713	chr11:4615075-4615869
chr11:49167900-49169029	chr11:89431043-89432176
chr11:49175333-49176572	chr11:89423540-89424759
chr11:49177758-49178912	chr11:89421199-89422352
chr11:49192223-49193387	chr11:89406699-89407860
chr11:4967034-4968846	chr11:4975617-4977459
chr11:51515606-51516687	chr11:48453302-48454375
chr11:5269135-5271719	chr11:5274053-5276642
chr11:56236558-56237714	chr11:56216409-56217563
chr11:56343891-56345061	chr11:56379672-56380840
chr11:58860958-58862127	chr11:58817151-58818314
chr11:60995276-60999172	chr11:60976450-60980341
chr11:66444338-66444510	chr11:66407223-66407394
chr11:74687907-74688202	chr1:28422140-28422433
chr11:88582668-88583918	chr11:49804780-49806030
chr11:89027904-89029089	chr11:49426088-49427271
chr11:89070107-89071225	chr11:49389724-49390838
chr11:89530783-89532312	chr11:89773644-89775232
chr11:89606207-89606890	chr11:89703972-89704634
chr11:89644253-89645652	chr11:89665155-89666551
chr11:89771251-89772572	chr11:89533443-89534765
chr11:94758526-94759775	chr11:94782390-94783639
chr12:10568812-10569906	chr12:10584270-10585320
chr1:13670061-13671064	chr1:13449204-13450205
chr12:10571857-10573685	chr12:10587302-10589081
chr12:10589632-10590876	chr12:10574206-10575455
chr12:10594312-10595445	chr12:10578889-10580027
chr12:11082724-11084161	chr12:11034326-11035825
chr12:11182574-11184067	chr12:11243396-11244960
chr12:11285716-11287426	chr12:11213765-11215474
chr12:11505075-11507211	chr12:11544795-11547187
chr12:11507921-11509117	chr12:11547898-11549097
chr12:123199741-123201020	chr12:123186341-123187571
chr12:132445438-132446271	chr12:132588806-132589640
chr1:13696809-13697659	chr1:13475974-13476820
chr12:133502315-133504261	gi|224514644|ref|NT_167217.1|:178499-180445
chr12:133508676-133510448	gi|224514644|ref|NT_167217.1|:172313-174085
chr12:133521653-133522961	gi|224514644|ref|NT_167217.1|:159799-161106
chr12:133562798-133564188	gi|224514644|ref|NT_167217.1|:118475-119862
chr12:133582991-133584737	gi|224514644|ref|NT_167217.1|:97927-99676
chr12:133586125-133588688	gi|224514644|ref|NT_167217.1|:93975-96536
chr12:133617334-133618703	gi|224514644|ref|NT_167217.1|:63961-65330
chr12:133623880-133626029	gi|224514644|ref|NT_167217.1|:56629-58785
chr12:133632992-133636082	gi|224514644|ref|NT_167217.1|:46582-49670
chr12:133639058-133640466	gi|224514644|ref|NT_167217.1|:42196-43607
chr1:13742375-13743484	chr1:13521545-13522620
chr12:133657528-133658838	gi|224514644|ref|NT_167217.1|:23829-25129
chr12:133659037-133661296	gi|224514644|ref|NT_167217.1|:21370-23628
chr12:133681563-133682653	gi|224514644|ref|NT_167217.1|:9-1099
chr12:21622640-21623783	chr11:106695033-106696164
chr12:31246137-31246198	chr12:9581787-9581848
chr12:31250485-31251152	chr12:9459460-9460124
chr12:31253051-31254144	chr12:9573906-9575031
chr12:34182045-34183149	chr12:38717209-38718289
chr1:13744112-13745709	chr1:13523257-13524841
chr12:4920249-4920349	chr12:5154529-5154629
chr12:49521976-49522781	chr12:49665973-49666744
chr12:52682263-52685571	chr12:52695384-52698692
chr12:52843832-52843890	chr12:52884932-52884990
chr12:52844078-52844300	chr12:52865743-52865954
chr12:52844801-52845903	chr12:52866466-52867559
chr12:8076781-8077469	chr12:7971851-7972544
chr1:13746559-13748296	chr1:13525700-13527434
chr13:113139922-113140566	chr13:111642227-111642866
chr13:20279656-20280243	chr13:19778312-19778927
chr13:24470442-24471629	chr13:24889636-24890824
chr13:24894601-24896195	chr13:24465145-24466738
chr13:25671181-25672269	chr12:64216647-64217759
chr13:41705107-41706385	chr13:41766856-41768131
chr13:52951297-52952002	chr13:52741841-52742546
chr14:19565841-19567028	chr22:16274257-16275444
chr14:20248460-20249732	chr15:22368554-22369854
chr14:23859267-23859616	chr14:23889055-23889404
chr14:24469402-24471342	chr14:24434300-24436238
chr14:24474562-24475728	chr14:24437431-24438601
chr1:1393948-1395143	chr1:1461248-1462441
chr14:51131638-51132398	chr4:144832412-144833167
chr14:74041112-74042768	chr14:74009245-74010909
chr15:102462114-102463627	chr19:110316-111836
chr15:21070713-21072219	chr15:22081874-22083379
chr15:22382400-22383065	chr15:22413389-22414052
chr1:1413783-1414804	chr1:1452442-1453472
chr15:30653793-30655611	chr15:32459543-32461358
chr15:30659212-30660333	chr15:32454825-32455925
chr15:30668512-30669972	chr15:32445443-32446903
chr15:30922317-30923545	chr15:32911721-32912948
chr15:30925833-30927210	chr15:32915833-32917211
chr15:31947293-31947604	chr15:31042453-31042764
chr15:32449197-32452447	chr15:30662708-30665964
chr15:34673925-34674122	chr15:34820145-34820343
chr1:1416224-1416350	chr1:1454280-1454402
chr15:34679645-34680468	chr15:34825871-34826692
chr15:34681214-34682539	chr15:34827438-34828758
chr15:43855610-43857807	chr15:43955160-43957349
chr15:43860003-43861360	chr15:43959571-43960927
chr15:43862971-43867224	chr15:43962539-43966789
chr15:43867939-43871934	chr15:43967498-43971507
chr15:43872496-43877321	chr15:43972332-43977159
chr1:144951699-144953417	chr1:144676372-144678090
chr15:45334893-45336245	chr15:45138970-45140321
chr1:144954631-144955997	chr1:144679307-144680673
chr15:45364994-45366216	chr15:45118767-45119985
chr15:45427372-45428708	chr15:45402749-45404084
chr15:58000882-58001489	chr4:68904347-68904948
chr15:72957490-72957694	chr15:74364232-74364434
chr15:74363217-74363340	chr15:72958593-72958716
chr15:75561335-75561484	chr15:75585611-75585760
chr1:145248171-145249632	chr1:120571789-120573249
chr15:78290128-78291132	chr15:79045019-79046024
chr15:83204977-83210418	chr15:82820631-82826068
chr15:83212770-83214059	chr15:82828427-82829718
chr15:83658636-83658998	chr6:166999430-166999790
chr15:84906358-84906466	chr15:85058141-85058247
chr15:85345066-85345693	chr18:3580202-3580822
chr15:89399856-89399953	chr15:89398830-89398927
chr16:1290373-1292737	chr16:1278153-1280517
chr16:14787416-14788620	chr16:14826535-14827738
chr16:15103021-15104154	chr16:70064352-70065481
chr16:15112237-15113389	chr16:70055161-70056310
chr16:16360164-16361557	chr16:18538284-18539685
chr16:18531654-18533005	chr16:16366848-16368191
chr16:18542358-18543483	chr16:16356373-16357494
chr16:20470962-20472099	chr16:20575502-20576640
chr16:20476366-20477571	chr16:20570032-20571235
chr16:20480303-20481503	chr16:20566127-20567327
chr16:20482441-20482529	chr16:20565107-20565195
chr1:108765685-108766796	chr1:109012810-109013888
chr1:145810808-145812582	chr1:147414971-147416742
chr16:20488118-20489318	chr16:20557167-20558368
chr16:20553849-20555127	chr16:20491346-20492631
chr16:226215-227657	chr16:222411-223930
chr16:2606817-2608411	chr16:2691782-2693374
chr1:145816052-145817313	chr1:147410255-147411562
chr16:2610813-2612600	chr16:2687595-2689380
chr16:2613394-2617192	chr16:2683002-2686801
chr16:2626792-2628019	chr16:2672174-2673398
chr16:2630592-2632403	chr16:2667781-2669592
chr16:2632721-2634377	chr16:2665808-2667464
chr16:2745237-2746671	chr16:2663266-2664694
chr16:28390469-28392818	chr16:28745133-28747483
chr16:28393822-28395494	chr16:28742457-28744132
chr16:28400917-28404059	chr16:28733884-28737022
chr16:28414120-28415608	chr16:28722342-28723826
chr1:146394821-146396001	chr1:146056800-146057962
chr16:28724331-28727367	chr16:28410579-28413616
chr16:28737297-28739203	chr16:28398737-28400646
chr16:29464250-29467708	chr16:30203590-30207047
chr16:29468378-29471024	chr16:30207718-30210359
chr16:29471296-29479727	chr16:30210630-30219074
chr16:30199865-30200676	chr16:29460524-29461334
chr16:3118934-3119235	chr16:3131580-3131877
chr16:53532379-53532441	chr5:24170588-24170650
chr1:1464601-1464775	chr1:1425942-1426115
chr16:55836334-55838153	chr16:55826677-55828501
chr16:55839566-55840888	chr16:55823942-55825265
chr16:70153907-70154923	chr16:74394215-74395255
chr16:70160608-70161856	chr16:74387116-74388363
chr16:70162139-70164309	chr16:74384703-74386822
chr16:70164710-70166609	chr16:74382363-74384248
chr16:70169550-70170930	chr16:74378038-74379414
chr16:70172290-70173526	chr16:74375428-74376662
chr16:70175862-70179071	chr16:74369857-74373068
chr1:147594959-147595114	chr1:146053173-146053325
chr16:70179084-70180625	chr16:74368295-74369836
chr16:70180840-70182054	chr16:74366866-74368078
chr16:70210617-70211916	chr16:74451433-74452708
chr16:70215179-70216539	chr16:69992271-69993629
chr16:70366836-70367164	chr16:70405238-70405566
chr16:70883084-70885009	gi|224514628|ref|NT_167207.1|:88286-90207
chr16:70888465-70889617	gi|224514628|ref|NT_167207.1|:93657-94818
chr16:70891039-70892316	gi|224514628|ref|NT_167207.1|:96227-97511
chr16:70893921-70896470	gi|224514628|ref|NT_167207.1|:99121-101740
chr16:70896558-70897757	gi|224514628|ref|NT_167207.1|:101754-102954
chr16:70898611-70900804	gi|224514628|ref|NT_167207.1|:103782-105975
chr16:70905423-70906688	gi|224514628|ref|NT_167207.1|:110588-111852
chr16:70907761-70909136	gi|224514628|ref|NT_167207.1|:112918-114287
chr16:70912682-70914235	gi|224514628|ref|NT_167207.1|:117838-119392
chr1:149675760-149677189	chr1:149290218-149291650
chr16:70916039-70917304	gi|224514628|ref|NT_167207.1|:121200-122466
chr16:70917471-70918592	gi|224514628|ref|NT_167207.1|:122632-123753
chr16:70922861-70924164	gi|224514628|ref|NT_167207.1|:127991-129291
chr16:70924917-70926918	gi|224514628|ref|NT_167207.1|:130044-132051
chr16:70927726-70929061	gi|224514628|ref|NT_167207.1|:132842-134192
chr16:70929293-70930482	gi|224514628|ref|NT_167207.1|:134423-135612
chr16:70936970-70938492	gi|224514628|ref|NT_167207.1|:142385-143909
chr16:70940614-70942881	gi|224514628|ref|NT_167207.1|:146004-148268
chr16:70951510-70952856	gi|224514628|ref|NT_167207.1|:156900-158248
chr16:70954317-70955684	gi|224514628|ref|NT_167207.1|:159716-161065
chr16:70969231-70970553	gi|224514628|ref|NT_167207.1|:174574-175895
chr16:70971976-70973023	gi|224514628|ref|NT_167207.1|:177324-178374
chr16:70975045-70976330	gi|224514628|ref|NT_167207.1|:180393-181676
chr16:70985797-70986937	gi|224514628|ref|NT_167207.1|:189448-190591
chr16:70988866-70990060	gi|224514628|ref|NT_167207.1|:192552-193744
chr16:70993093-70994252	gi|224514628|ref|NT_167207.1|:196776-197927
chr16:70995349-70996610	gi|224514628|ref|NT_167207.1|:199032-200295
chr16:70998116-70999353	gi|224514628|ref|NT_167207.1|:201795-203034
chr16:71003914-71005178	gi|224514628|ref|NT_167207.1|:207656-208917
chr16:71006610-71009856	gi|224514628|ref|NT_167207.1|:210344-213589
chr1:149803578-149805222	chr1:149831723-149833365
chr16:71012266-71013550	gi|224514628|ref|NT_167207.1|:215997-217285
chr16:71014830-71015945	gi|224514628|ref|NT_167207.1|:218593-219706
chr16:71018586-71019815	gi|224514628|ref|NT_167207.1|:222356-223583
chr16:71021176-71022992	gi|224514628|ref|NT_167207.1|:224947-226768
chr16:71024641-71026263	gi|224514628|ref|NT_167207.1|:228381-230032
chr16:71051412-71052948	gi|224514628|ref|NT_167207.1|:261252-262785
chr16:71058658-71060074	gi|224514628|ref|NT_167207.1|:268501-269921
chr16:71061021-71062356	gi|224514628|ref|NT_167207.1|:271190-272529
chr16:71065068-71066362	gi|224514628|ref|NT_167207.1|:275251-276545
chr16:71093791-71095148	gi|224514628|ref|NT_167207.1|:303945-305301
chr1:149821407-149825307	chr1:149811640-149815537
chr16:71095504-71096722	gi|224514628|ref|NT_167207.1|:305647-306865
chr16:71113300-71114454	gi|224514628|ref|NT_167207.1|:323448-324601
chr16:71121683-71122877	gi|224514628|ref|NT_167207.1|:331824-333018
chr16:71149051-71150261	gi|224514628|ref|NT_167207.1|:359290-360501
chr16:71163107-71164274	gi|224514628|ref|NT_167207.1|:373341-374509
chr16:71170500-71171859	gi|224514628|ref|NT_167207.1|:380421-381779
chr16:71185972-71187226	gi|224514628|ref|NT_167207.1|:396939-398193
chr16:71195918-71197264	gi|224514628|ref|NT_167207.1|:406915-408262
chr16:72088471-72088584	chr16:72097075-72097188
chr16:72108424-72109735	chr16:72090671-72092919
chr1:108768812-108770083	chr1:109009494-109010775
chr1:152084510-152084546	chr18:53253404-53253440
chr16:74442931-74444175	chr16:70219154-70220355
chr16:75238606-75238895	chr16:75257859-75258146
chr16:75239564-75240077	chr16:75256679-75257192
chr16:75257233-75257651	chr16:75239108-75239521
chr16:89334792-89335015	chrX:145701017-145701232
chr17:10321990-10322230	chr17:10265462-10265702
chr17:10433217-10433319	chr17:10406391-10406493
chr17:13399524-13400050	chr17:14248433-14248955
chr17:14094848-14096184	chr17:15491713-15492996
chr1:152277657-152279885	chr1:152275713-152276969
chr17:14139204-14140532	chr17:13927449-13928788
chr17:15449769-15451009	chr17:18700344-18701587
chr17:15499241-15500472	chr17:18669530-18670764
chr17:15508030-15509342	chr17:18661011-18662325
chr17:15516309-15517779	chr17:18652602-18654069
chr17:15518513-15519614	chr17:18650766-18651860
chr17:15521727-15523361	chr17:18646977-18648653
chr17:15545451-15546838	chr17:18624842-18626229
chr17:15583680-15584842	chr17:18604094-18605256
chr1:152327810-152328045	chr1:152328266-152328494
chr17:15638202-15639672	chr17:18543655-18545124
chr17:15641505-15642687	chr17:18540628-18541813
chr17:16630145-16631566	chr17:18490466-18491890
chr17:16664470-16665609	chr17:20294514-20295659
chr17:16675249-16676544	chr17:20303787-20305081
chr17:18386592-18387725	chr17:20363220-20364352
chr17:18388694-18390159	chr17:20360787-20362251
chr17:18390318-18391572	chr17:20359371-20360626
chr17:18542015-18543016	chr17:15640350-15641389
chr17:18564709-18566946	chr17:15618965-15621143
chr17:18584292-18585673	chr17:15602933-15604316
chr17:18637731-18639295	chr17:15531408-15532969
chr17:18667515-18668717	chr17:15501303-15502506
chr17:18681435-18682891	chr17:15468565-15470026
chr17:18693652-18694756	chr17:15456621-15457691
chr17:18937554-18940418	chr17:19040763-19043614
chr17:18949464-18950879	chr17:19030291-19031709
chr17:19035310-19036693	chr17:18944481-18945863
chr17:19061112-19062591	chr17:19122282-19123768
chr17:20352751-20354044	chr17:18396926-18398217
chr17:20483026-20484252	chr17:15667992-15669209
chr17:25964718-25966092	chr17:26072586-26073952
chr17:2965407-2967525	chr17:3143345-3145461
chr17:3301557-3301704	chr17:3336991-3337134
chr17:3323581-3324575	chr17:3181514-3182510
chr17:33768312-33769309	chr17:33680085-33681076
chr17:34522169-34524708	chr17:34623742-34626285
chr17:34537955-34541613	chr17:34639522-34643180
chr17:39261317-39261966	chr17:39240135-39240788
chr17:39382783-39384108	chr17:39394135-39395466
chr17:39521294-39521882	chr17:39502970-39503548
chr17:40370206-40372108	chr17:40451517-40453422
chr17:41003411-41004103	chr17:41019344-41020035
chr17:41008213-41008819	chr17:41026027-41026638
chr1:155579507-155582433	chr1:155715085-155718015
chr17:44414025-44415322	chr17:44631880-44633180
chr17:44415737-44416738	chr17:44633559-44634583
chr17:44429530-44430894	chr17:44647470-44648831
chr1:155583257-155583592	chr1:155719123-155719455
chr17:44434996-44436335	chr17:44652922-44654262
chr1:155583813-155584189	chr1:155719679-155720052
chr17:45599822-45601083	chr17:36421078-36422342
chr17:45622672-45623910	chr17:36397669-36398905
chr17:45646270-45647438	chr17:36374519-36375690
chr17:45659547-45660816	chr17:36361093-36362365
chr17:45662934-45664184	chr17:36357724-36358974
chr17:45667582-45668861	chr17:36352986-36354272
chr1:108771010-108772174	chr1:109007413-109008577
chr1:155629818-155631664	chr1:155735611-155736641
chr17:58282296-58283476	chr17:60359545-60360747
chr17:58283924-58287340	chr17:60361180-60364600
chr17:58287874-58289303	chr17:60365187-60366568
chr17:58290332-58292644	chr17:60367602-60369903
chr17:60503150-60504582	chr7:128118702-128120138
chr17:60504608-60505805	chr7:128120159-128121360
chr17:60511947-60513179	chr7:128127512-128128740
chr17:60517512-60518600	chr7:128133398-128134482
chr17:60599883-60601056	chr7:128218332-128219503
chr17:60601122-60602336	chr7:128219576-128220792
chr1:155642047-155642777	chr1:155744490-155745219
chr17:60629009-60630280	chr7:128247517-128248789
chr17:60689891-60690000	chr17:32364565-32364674
chr17:61972317-61974461	chr17:61949421-61951529
chr18:10910581-10911924	chr18:12081099-12082433
chr1:155720345-155720488	chr1:155584480-155584628
chr18:14851202-14852426	chr21:14756564-14757778
chr18:46807-47992	chr10:92416-93597
chr19:12540396-12541696	chr19:12500706-12502002
chr19:12542193-12544664	chr19:12502419-12504890
chr19:14498685-14499860	chr19:14884515-14885690
chr19:14508164-14509106	chr19:14875973-14876922
chr1:155721484-155722822	chr1:155585291-155586627
chr19:14752310-14752398	chr19:14863220-14863308
chr19:15769614-15770729	chr19:15989047-15990159
chr19:15918216-15918876	chr19:15838824-15839484
chr19:17107996-17108091	chr7:9766757-9766852
chr19:21927472-21928085	chr19:21820560-21821167
chr19:22573741-22575839	chr19:22846547-22848643
chr19:23544234-23544813	chr19:23543310-23543889
chr19:29698773-29698933	chr22:40271642-40271799
chr1:155727282-155728162	chr1:155588277-155589156
chr19:35173142-35174278	chr19:35035694-35036831
chr19:35231982-35233147	chr19:35033223-35034385
chr19:35849132-35851415	chr19:35861599-35863887
chr19:37642142-37643868	chr19:37675779-37677505
chr19:39279577-39282958	chr19:39261036-39264421
chr19:40373452-40374693	chr19:40389161-40390400
chr1:155734608-155734685	chr1:155619422-155619499
chr19:40379489-40381271	chr19:40395173-40396958
chr19:40381876-40383444	chr19:40397547-40399128
chr19:40383938-40385383	chr19:40399632-40401067
chr19:41514475-41515681	chr19:41446553-41447758
chr19:41630770-41632315	chr19:41326617-41328159
chr19:43371912-43373067	chr19:43258145-43259297
chr19:43528308-43529455	chr19:43584499-43585645
chr1:1567495-1570504	chr1:1630717-1633728
chr19:48306239-48307479	chr19:48362818-48364060
chr19:4954727-4954787	chr12:20705587-20705647
chr19:50462196-50464873	chr19:50472391-50475063
chr19:51125412-51126718	chr19:50577675-50578983
chr19:52132493-52133927	chr19:52148916-52150348
chr19:53516780-53518975	chr19:53551944-53554135
chr19:53769802-53771063	chr19:53818244-53819506
chr19:53925736-53927097	chr19:54006330-54007695
chr1:1570578-1572177	chr1:1633797-1635384
chr19:54723985-54725060	chr19:54743740-54744821
chr19:54725901-54727678	chr19:54745653-54747430
chr19:54779692-54780875	chr19:55145988-55147173
chr19:54881264-54882493	chr19:55008814-55010092
chr19:55235416-55238336	gi|89056990|ref|NT_113949.1|:7327-10251
chr19:55238732-55239977	gi|89056990|ref|NT_113949.1|:10646-11889
chr19:55240345-55241933	gi|89056990|ref|NT_113949.1|:12253-13842
chr19:55258847-55259008	gi|89056990|ref|NT_113949.1|:30796-30950
chr1:1572710-1574512	chr1:1635926-1637731
chr19:55314473-55318389	gi|89056990|ref|NT_113949.1|:56618-60534
chr19:55319803-55321060	gi|89056990|ref|NT_113949.1|:61950-63207
chr19:55325256-55325654	gi|89056990|ref|NT_113949.1|:67407-67801
chr19:5610746-5612092	chr19:5648549-5649896
chr19:56272657-56275123	chr19:56282662-56285131
chr19:56530454-56531107	chr19:56531487-56532140
chr19:58015718-58017212	chr19:58002532-58004014
chr1:1575194-1578452	chr1:1638407-1641658
chr19:58018101-58018687	chr19:58004604-58005183
chr19:58320004-58320787	chr19:58386129-58386910
chr19:58350265-58350480	chr19:58324698-58324911
chr19:58367449-58367674	chr19:58423353-58423578
chr19:5866571-5867220	chr19:5831457-5832104
chr19:58966685-58967994	chr19:58982232-58983541
chr19:7020639-7022137	chr19:7048655-7050155
chr19:9016914-9018112	chr19:9014102-9015297
chr1:108775010-108778672	chr1:109000908-109004574
chr1:15789905-15790044	chr1:15809784-15809919
chr2:110612925-110614148	chr2:111272513-111273733
chr2:110660384-110662609	chr2:111224050-111226275
chr2:110676324-110677870	chr2:111208790-111210336
chr2:110842651-110845908	chr2:111040624-111043889
chr2:110848594-110849726	chr2:111036823-111037925
chr2:112526333-112527636	chr2:87422985-87424286
chr2:112528062-112530731	chr2:87419886-87422555
chr2:112533761-112535240	chr2:87415376-87416853
chr2:112535610-112536892	chr2:87413728-87415003
chr2:112537146-112538635	chr2:87411983-87413468
chr1:1579938-1584023	chr1:1643158-1647254
chr2:112539406-112540596	chr2:87409571-87410758
chr2:112540852-112543594	chr2:87406569-87409310
chr2:112545220-112546387	chr2:87403783-87404945
chr2:112549333-112550569	chr2:87399600-87400829
chr2:112551795-112553052	chr2:87397112-87398370
chr2:112557775-112559062	chr2:87391091-87392383
chr2:112559434-112560837	chr2:87389319-87390722
chr2:112578652-112579352	chr2:87276550-87277248
chr2:112590272-112591384	chr2:87356730-87357846
chr1:159018630-159019916	chr1:159014494-159015781
chr2:114385566-114386917	chr22:51219985-51221339
chr2:114391116-114392278	chr22:51214628-51215790
chr2:130737138-130738946	chr2:132120036-132121841
chr2:130901645-130902882	chr2:132285228-132286468
chr1:1590989-1592144	chr1:1656282-1657433
chr2:130914336-130915457	chr2:132272682-132273808
chr2:130939676-130940877	chr2:132248920-132250120
chr2:130948969-130950060	chr2:132239764-132240859
chr2:130952135-130954308	chr2:132235370-132237533
chr2:131280194-131281473	chr2:131354446-131355727
chr2:131349883-131351306	chr2:131284615-131286027
chr2:131355744-131357567	chr2:131278352-131280170
chr2:131388624-131389297	chr2:131246536-131247209
chr2:131396219-131396307	chr2:131239530-131239618
chr2:131403458-131404131	chr2:131231699-131232379
chr1:1599207-1600463	chr1:1665570-1666830
chr2:178415387-178417089	chr2:178481326-178483025
chr2:179519097-179520314	chr2:179523357-179524574
chr2:231174866-231176859	chr2:231265076-231267069
chr2:233244945-233246539	chr2:233273026-233274616
chr2:240969002-240970013	chr2:240984645-240985656
chr2:241615374-241616792	chr2:241636945-241638359
chr2:241618371-241620477	chr2:241633255-241635364
chr2:241631260-241632517	chr2:241621070-241622322
chr1:1606402-1608733	chr1:1669261-1671591
chr2:86967588-86968837	chr2:87282137-87283379
chr2:87068794-87070009	chr2:107122816-107124031
chr2:87079559-87080767	chr2:107112067-107113278
chr2:87244124-87245324	chr2:88051252-88052443
chr2:96145599-96146711	chr2:96261525-96262626
chr2:96147652-96148910	chr2:96259323-96260578
chr2:96569959-96571203	chr2:96564342-96565585
chr2:96609786-96611394	chr16:33533563-33535193
chr1:161332156-161332309	chr17:1761246-1761399
chr2:96619116-96620315	chr16:33539006-33540210
chr2:97817717-97818770	chr2:96615986-96617054
chr2:97828440-97830714	chr2:96604065-96606318
chr2:97832740-97834094	chr2:96600615-96601962
chr2:97850537-97851729	chr2:96588760-96589903
chr1:161487175-161488453	chr1:161568829-161570110
chr2:97878694-97879912	chr2:98159690-98160912
chr2:97880568-97881766	chr2:98157843-98159038
chr2:97906402-97907769	chr2:98131636-98133005
chr21:14981966-14983345	gi|224514658|ref|NT_167208.1|:138492-139869
chr21:40714944-40715017	chr2:98444033-98444106
chr22:17264092-17265839	gi|224514675|ref|NT_167240.1|:12511-14238
chr1:161493892-161496268	chr1:161575523-161577900
chr22:18643919-18645137	chr22:20729345-20730561
chr22:18652991-18654343	chr22:20720208-20721551
chr22:20377804-20378984	chr22:21821580-21822736
chr22:20717315-20719172	chr22:18655351-18657208
chr22:21575657-21577134	chr22:18774549-18776024
chr22:21796766-21797336	chr22:21846134-21846699
chr22:24299281-24301525	chr22:24324178-24326420
chr1:161598943-161600257	chr1:161517587-161518898
chr22:24302554-24303933	chr22:24321774-24323151
chr22:24308485-24311061	chr22:24314642-24317221
chr22:24318399-24319759	chr22:24305947-24307307
chr22:25423296-25426083	gi|224514666|ref|NT_167236.1|:12167-14951
chr22:25427995-25429194	gi|224514666|ref|NT_167236.1|:16865-18063
chr22:25434182-25438080	gi|224514666|ref|NT_167236.1|:23057-26957
chr22:25444548-25445863	gi|224514666|ref|NT_167236.1|:33434-34751
chr22:28248915-28251560	gi|224514683|ref|NT_167243.1|:31805-34447
chr22:28253777-28255065	gi|224514683|ref|NT_167243.1|:36665-37958
chr1:161632380-161633946	chr1:161550576-161552143
chr22:29762667-29763785	chr22:29818587-29819679
chr22:32547950-32549082	chr22:29804023-29805156
chr22:39381390-39382530	chr22:39440527-39441645
chr22:39387045-39387954	chr22:39357103-39358009
chr22:39388237-39388551	chr22:39358301-39358614
chr22:39438918-39439053	chr22:39474915-39475048
chr22:39447811-39448505	chr22:39427431-39428124
chr22:42522382-42523545	chr22:42536104-42537255
chr22:42524350-42526533	chr22:42538044-42540200
chr1:161639361-161640736	chr1:161557530-161558901
chr22:42950427-42953183	chr22:42897116-42899866
chr22:42953685-42955079	chr22:42900374-42901768
chr22:51182651-51184193	chr2:114424497-114426039
chr22:51206737-51208920	chr2:114397994-114400172
chr22:51210925-51212155	chr2:114394763-114395993
chr3:123693630-123695141	chr3:125695089-125696604
chr3:125691185-125692440	chr3:123697778-123699035
chr1:161642272-161644547	chr1:161560441-161562716
chr3:129199821-129201042	chr3:128583619-128584841
chr3:129234059-129234697	chr3:129112612-129113251
chr3:132318899-132321000	chr6:139143542-139145639
chr3:178937248-178938395	chr22:17053827-17054973
chr3:178960234-178961631	chr22:17061338-17062736
chr3:33883415-33883496	chr15:23142530-23142611
chr3:44544105-44544942	chr3:44609010-44609846
chr3:75779048-75780356	gi|224514643|ref|NT_167216.1|:22454-23760
chr3:75780568-75781859	gi|224514643|ref|NT_167216.1|:20947-22242
chr3:75785403-75789040	gi|224514643|ref|NT_167216.1|:13687-17295
chr3:75790026-75791554	gi|224514643|ref|NT_167216.1|:11161-12700
chr3:75986170-75987355	chr20:26210590-26211742
chr3:97887152-97888321	chr3:97851137-97852318
chr4:1388723-1388754	chr4:1389339-1389370
chr4:144939857-144940980	chr4:145061201-145062333
chr4:165890065-165891486	chr4:165836387-165837806
chr4:166199653-166200799	chr4:120314967-120316114
chr4:184241034-184241214	chr4:184243244-184243423
chr4:38798620-38799275	chr4:38829247-38829904
chr4:4190011-4191219	chr2:91808723-91809968
chr4:69425633-69426909	chr4:69528107-69529380
chr4:69519525-69520147	chr4:69416171-69416780
chr4:69533795-69533938	chr4:69431327-69431469
chr4:71227525-71228208	chr4:71249926-71250603
chr4:75311738-75313000	chr4:75481491-75482751
chr4:75314188-75315467	chr4:75483947-75485220
chr4:75315567-75316788	chr4:75485323-75486546
chr4:75317679-75318919	chr4:75487438-75488677
chr4:75319958-75321150	chr4:75489719-75490910
chr5:140208046-140209329	chr5:140221276-140222559
chr5:140213808-140215447	chr5:140227923-140229556
chr5:140482392-140482608	chr5:140476541-140476754
chr5:140566972-140567265	chr5:140572205-140572497
chr1:1653649-1654856	chr1:1588326-1589535
chr5:140593193-140594850	chr5:140557111-140558768
chr5:140725323-140725942	chr5:140755376-140755992
chr5:140731265-140731986	chr5:140741151-140741872
chr5:140767187-140768129	chr5:140777427-140778372
chr5:175386497-175388980	chr5:177308824-177311297
chr5:175391263-175392701	chr5:177305102-177306537
chr5:175393545-175394930	chr5:177302870-177304255
chr5:175461172-175462246	chr5:177235840-177236938
chr5:175527973-175529245	chr5:177162920-177164206
chr1:16905096-16906382	chr1:16911391-16912683
chr5:175535538-175536728	chr5:177155432-177156623
chr5:175716438-175718374	chr5:177057950-177059961
chr5:175721624-175723870	chr5:177052889-177055002
chr5:177150614-177151925	chr5:175540237-175541557
chr5:177161288-177162543	chr5:175529612-175530879
chr5:177165695-177168936	chr5:175523223-175526459
chr5:177179473-177180680	chr5:177457120-177458319
chr5:178139126-178140278	chr5:178310052-178311202
chr5:178155899-178156169	chr5:178287903-178288169
chr5:180431027-180431839	chr5:180375528-180376338
chr5:216323-217578	chr5:1597630-1598884
chr5:23527326-23527519	chr5:23527578-23527771
chr5:303712-304964	chr5:1602178-1603430
chr5:69320537-69322971	chr5:70195958-70198397
chr5:69325060-69326245	chr5:70200501-70201660
chr5:69336747-69339175	chr5:70212167-70214597
chr5:69344963-69346214	chr5:70220379-70221634
chr5:69358523-69360014	chr5:70233941-70235442
chr5:69361095-69363910	chr5:70236513-70239332
chr5:69364213-69365791	chr5:70239636-70241215
chr5:69372181-69373507	chr5:70247601-70248925
chr5:70241236-70243256	chr5:69365815-69367830
chr5:70265319-70266938	chr5:69389876-69391495
chr5:70269375-70270719	chr5:69393933-69395272
chr1:196714464-196715654	chr1:196799146-196800336
chr5:70271324-70273478	chr5:69395880-69398033
chr5:741034-742303	chr5:833215-834482
chr5:744782-745875	chr5:836977-838106
chr5:747855-748968	chr5:839943-841066
chr5:754817-755605	chr5:847333-848124
chr5:755668-756541	chr5:848181-849062
chr5:796040-796988	chr5:711742-712691
chr1:196758598-196759972	chr1:196883503-196884878
chr6:108984693-108984781	chr17:18575493-18575579
chr6:108985346-108985613	chr17:18574661-18574929
chr6:108985626-108986080	chr17:18574195-18574648
chr6:132020858-132023181	chr7:143955035-143957354
chr6:150340599-150343730	chr6:150266134-150269233
chr6:161173486-161174767	chr6:160873783-160875059
chr6:167586628-167588071	chr6:167793996-167795433
chr6:167589930-167591226	chr6:167790844-167792129
chr6:167593511-167595885	chr6:167786174-167788554
chr6:167728752-167728833	chr6:167622225-167622306
chr1:196788244-196789654	chr1:196912280-196913692
chr6:167789396-167790776	chr6:167591283-167592666
chr6:26368264-26369383	chr6:26443655-26444766
chr6:27776027-27776272	chr6:27782234-27782479
chr6:27791870-27792224	chr6:27798983-27799337
chr6:31132157-31132699	chr12:8286138-8286705
chr6:3156176-3156412	chr6:3179738-3179976
chr6:31795245-31797925	chr6:31783051-31785731
chr6:31948281-31949299	chr6:31981019-31982041
chr6:31949498-31952552	chr6:31982234-31985289
chr1:202991985-202992346	chr3:149699787-149700147
chr6:31958347-31967991	chr6:31991086-32000726
chr6:31968230-31970892	chr6:32000964-32003626
chr6:31973323-31975068	chr6:32006057-32007807
chr6:32008070-32013443	chr6:31975337-31980589
chr6:32486668-32487814	chr6:32548855-32550004
chr6:32497381-32498436	chr6:32556887-32557993
chr6:32551968-32552046	chr6:32489764-32489842
chr6:56911422-56912867	chr6:56954921-56956366
chr1:206565477-206566850	chr1:121115260-121116637
chr7:101994769-101995875	chr7:102293386-102294483
chr7:102130764-102132313	chr7:102229936-102231489
chr7:102135977-102137319	chr7:102235193-102236477
chr7:102140497-102141967	chr7:102239656-102241133
chr7:102142981-102144375	chr7:102242140-102243535
chr7:102146648-102147731	chr7:102245835-102246876
chr7:102149365-102150686	chr7:102248528-102249847
chr1:206574167-206575550	chr1:121123945-121125330
chr7:102151734-102153268	chr7:102250892-102252417
chr7:102157488-102158634	chr7:102256461-102257624
chr7:102179997-102182355	chr7:102279103-102281466
chr7:102264105-102265359	chr7:102165013-102166276
chr7:102277369-102278612	chr7:102178260-102179501
chr7:102282478-102283814	chr7:102183370-102184715
chr7:102389026-102390612	chr7:76750472-76752065
chr7:102397720-102398913	chr7:76742193-76743379
chr7:102401119-102402240	chr7:76738878-76739992
chr7:102417166-102418445	chr7:76722669-76723944
chr1:206577926-206580531	chr1:121127678-121130289
chr7:102427221-102428362	chr7:76712758-76713899
chr7:105903907-105903972	chr10:36812320-36812385
chr7:126543760-126544322	chr7:65082423-65082983
chr7:128497718-128498966	chr7:128552324-128553576
chr7:134260152-134261168	chr7:134221382-134222399
chr7:141762100-141762751	chr7:141791440-141792097
chr7:141766564-141767695	chr7:141795553-141796686
chr7:143550572-143551865	chr7:143304256-143305554
chr7:143928335-143930588	chr7:144014568-144016818
chr7:144060565-144065089	chr7:143978730-143983275
chr1:207701431-207702904	chr1:207719987-207721459
chr7:144067757-144070964	chr7:143972840-143976060
chr7:144071230-144073393	chr7:143970428-143972585
chr7:144074041-144074369	chr7:143969451-143969782
chr7:149981224-149982394	chr7:152521659-152522823
chr7:149986025-149987235	chr7:152516830-152518041
chr7:149989563-149991116	chr7:152512952-152514505
chr7:151944352-151945785	chr21:11038092-11039558
chr7:151961550-151962847	chr21:11048875-11050175
chr7:151970177-151971551	chr21:11057552-11058946
chr7:152479653-152480905	chr7:149606167-149607409
chr1:207704919-207706319	chr1:207723472-207724877
chr7:152498147-152499439	chr7:149587656-149588945
chr7:152511087-152512149	chr7:149991928-149992983
chr7:34971170-34971356	chr7:32878008-32878191
chr7:34980868-34982032	chr7:32860551-32861712
chr12:125598822-125599123	chr5:178224511-178224805
chr12:125619253-125619401	chr5:178201495-178201629
chr12:125619469-125619598	chr5:178201288-178201417
chr12:125621007-125621440	chr5:178199399-178199832
chr12:125621443-125621610	chr5:178199231-178199396
chr12:125626594-125626791	chr5:178194172-178194385
chr12:125602986-125603438	chr5:178220187-178220637
chr12:125603465-125603511	chr5:178220114-178220160
chr12:125609069-125609474	chr5:178213899-178214310
chr12:125609608-125609716	chr5:178213528-178213637
chr12:125612506-125613020	chr5:178209060-178209573
chr12:125613680-125614206	chr5:178207873-178208407
chr12:125618348-125618818	chr5:178202068-178202537
chr12:125619139-125619216	chr5:178201666-178201753
chr3:151545656-151545816	chr3:151501908-151502065
chr16:16295657-16296235	chr16:18603660-18604238
chr16:16297066-16297670	chr16:18602225-18602829
chr16:16302384-16302916	chr16:18596927-18597459
chr16:16305841-16306303	chr16:18593527-18593989
chr16:16307980-16308506	chr16:18591332-18591857
chr7:150910939-150910943	chr3:88368369-88368373
chr7:150911764-150911855	chr7:71568432-71568527
chr7:150912685-150912794	chr3:88367728-88367827
chr7:150915637-150915748	chr3:88367437-88367529
chr10:27037298-27037683	chr14:56014668-56015049
chr10:27057810-27057931	chr14:56014255-56014367
chr9:111698565-111698726	chr13:46844326-46844471
chr9:111701822-111702166	chr13:46844622-46844959
chr6:26597177-26597458	chr4:99944045-99944307
chr6:26598149-26598346	chr4:99943848-99944036
chr6:26598484-26598976	chr4:99943358-99943849
chr6:26599008-26599073	chr4:99943268-99943325
chr16:20422606-20423231	chr16:20618002-20618639
chr16:20451465-20451949	chr16:20598579-20599064
chr16:20430349-20430961	chr16:20615376-20615984
chr16:20432379-20432923	chr16:20613419-20613963
chr16:20435037-20435591	chr16:20610683-20611250
chr16:20438909-20439389	chr16:20606886-20607366
chr16:20440799-20441323	chr16:20604936-20605474
chr16:20442114-20442843	chr16:20603423-20604158
chr16:20448173-20448889	chr16:20601643-20602359
chr16:20450921-20451441	chr16:20599088-20599608
chr2:114714925-114715030	chrX:67992326-67992422
chr14:70924016-70926585	chr14:70712007-70714563
chr6:46821528-46821654	chr9:44170233-44170363
chr6:46821821-46822008	chr9:44170534-44170721
chr6:46823510-46823527	chr9:44171978-44171994
chr6:46823576-46823773	chr9:44172043-44172240
chr6:46823897-46823995	chr9:44172364-44172462
chr6:46824463-46824739	chr9:44172930-44173205
chr6:46824844-46824845	chr9:44173310-44173311
chr6:46825665-46825703	chr9:44174130-44174168
chr6:46825726-46825920	chr9:44174191-44174385
chr17:15878069-15878225	chr1:209917974-209918130
chr18:12343930-12343955	chr8:43124829-43124848
chr18:12367266-12367393	chr8:43126701-43126809
chr18:12371582-12371701	chr8:43126889-43126989
chr18:12376960-12377126	chr8:43126988-43127148
chr18:12348263-12348394	chr8:43125458-43125570
chr18:12351075-12351220	chr8:43125569-43125695
chr18:12351295-12351423	chr8:43125694-43125803
chr18:12352994-12353105	chr8:43125802-43125894
chr18:12356682-12356843	chr8:43125944-43126086
chr18:12358661-12358953	chr8:43126085-43126348
chr18:12359916-12360061	chr8:43126347-43126473
chr18:12366953-12367128	chr8:43126546-43126702
chr10:47191941-47193733	chr10:46194003-46195801
chr10:47193978-47194430	chr10:46193317-46193764
chr10:47197337-47197773	chr10:46189995-46190420
chr10:47199960-47200461	chr10:46187306-46187806
chr10:47207611-47208046	chr10:46179737-46180168
chr10:47210286-47210755	chr10:46177019-46177488
chr10:47212653-47213714	chr10:46174078-46175126
chr7:141315258-141315375	chrY:16751395-16751493
chr7:141341599-141341718	chrY:16751850-16751950
chr7:141352630-141352847	chrY:16752147-16752365
chr7:141352909-141352924	chrY:16752425-16752440
chrX:129263368-129263486	chr10:19027609-19027732
chrX:129263509-129263614	chr10:19027490-19027586
chrX:129267278-129267441	chr10:19027044-19027188
chrX:129272556-129272661	chr10:19026613-19026708
chrX:129290424-129290561	chr10:19024797-19024924
chr1:33487185-33487314	chr2:32048556-32048669
chr1:33490033-33490180	chr2:32048668-32048796
chr1:33502328-33502453	chr2:32048795-32048901
chr19:15472531-15472635	chr9:11012883-11012977
chr19:15472917-15473071	chr9:11012743-11012878
chr19:15483985-15484132	chr9:11011979-11012126
chr19:15484588-15484750	chr9:11011806-11011958
chr6:88385114-88385335	chr4:150711443-150711655
chr6:88387525-88387697	chr4:150711219-150711372
chr6:88391335-88391450	chr4:150711115-150711220
chr7:137773415-137773522	chr1:167489022-167489119
chr7:137790048-137790181	chr1:167489320-167489437
chr7:137791340-137791472	chr1:167489436-167489549
chr7:137792205-137792337	chr1:167489592-167489705
chr1:19630646-19630895	chr1:113466798-113467028
chr1:19632506-19632652	chr1:113466672-113466799
chr1:19633486-19633591	chr1:113466578-113466673
chr1:19633798-19633917	chr1:113466473-113466573
chr1:19634644-19634768	chr1:113466369-113466474
chr3:183960268-183960477	chr5:5375807-5376000
chr3:183960593-183960755	chr5:5375999-5376144
chr3:183961628-183961798	chr5:5376269-5376430
chr3:183962382-183962523	chr5:5376429-5376551
chr3:183963248-183963412	chr5:5376693-5376839
chr2:73826327-73826848	chr2:73897957-73898477
chr2:73827604-73828763	chr2:73899236-73900377
chr2:73829111-73829695	chr2:73900725-73901323
chr2:73830167-73830631	chr2:73901769-73902232
chr17:4534694-4534835	chr9:95683902-95684043
chr17:4540372-4540603	chr9:95678269-95678500
chr17:4540722-4540753	chr9:95678039-95678080
chr17:4541311-4541456	chr9:95677349-95677484
chr17:4541464-4541841	chr9:95676968-95677341
chr17:4541865-4542052	chr9:95676759-95676944
chr17:4542067-4542393	chr9:95676422-95676744
chr17:4542549-4542651	chr9:95675829-95675926
chr17:4542735-4542916	chr9:95675560-95675741
chr17:4544896-4545042	chr9:95675341-95675490
chr17:4534901-4535378	chr9:95683366-95683835
chr17:4535501-4535776	chr9:95682968-95683244
chr17:4535955-4536007	chr9:95682732-95682785
chr17:4536057-4536618	chr9:95682141-95682682
chr17:4536701-4536988	chr9:95681769-95682058
chr17:4539025-4539215	chr9:95679887-95680073
chr17:4539424-4539463	chr9:95679656-95679695
chr17:4540209-4540277	chr9:95678567-95678636
chr2:128622467-128622778	chr13:97226650-97226952
chr2:128628380-128628481	chr13:97226410-97226501
chr2:128628823-128628944	chr13:97226278-97226380
chr2:128631392-128631503	chr13:97226178-97226279
chr2:128631691-128631823	chr13:97225865-97225991
chr17:66246128-66246328	chr17:62969635-62969838
chr17:66246610-66246933	chr17:62969046-62969360
chr17:66250344-66250387	chr17:62965543-62965576
chr17:66251902-66252217	chr17:62965230-62965544
chr17:66252754-66253310	chr17:62964139-62964699
chr4:145916441-145916766	chr1:52719617-52719937
chr4:145985714-145985856	chr1:52719495-52719618
chr4:146002803-146002916	chr1:52719402-52719496
chr2:112595814-112596289	chr2:87139825-87140300
chr2:112622182-112622728	chr2:87113506-87114052
chr2:112625399-112625873	chr2:87110278-87110768
chr2:112630006-112630489	chr2:87106391-87106874
chr2:112630684-112631441	chr2:87105439-87106196
chr2:112636186-112636748	chr2:87100109-87100671
chr2:112637989-112638602	chr2:87098253-87098866
chr2:112600788-112601376	chr2:87134750-87135339
chr2:112604514-112604975	chr2:87131427-87131888
chr2:112605101-112605642	chr2:87130760-87131301
chr2:112608152-112608687	chr2:87127719-87128255
chr2:112613990-112614663	chr2:87121715-87122390
chr2:112615682-112616178	chr2:87120203-87120696
chr2:112619765-112620375	chr2:87115989-87116599
chr2:112621051-112621672	chr2:87114699-87115319
chr18:14748597-14748839	chr21:14410703-14410944
chr18:14760352-14760624	chr21:14421089-14421357
chr18:14760761-14760817	chr21:14421484-14421540
chr18:14763569-14763786	chr21:14424000-14424208
chr18:14822403-14822540	chr21:14786052-14786189
chr18:14831181-14831211	chr21:14777741-14777768
chr18:14837792-14837875	chr21:14771087-14771170
chr18:14840387-14840877	chr21:14768088-14768573
chr18:14842695-14843295	chr21:14765666-14766270
chr18:14752364-14752632	chr21:14414620-14414890
chr18:14752660-14752767	chr21:14414918-14415029
chr18:14752778-14752923	chr21:14415040-14415185
chr18:14752961-14753211	chr21:14415223-14415475
chr18:14754697-14754796	chr21:14417296-14417385
chr18:14754940-14755204	chr21:14417526-14417790
chr18:14757635-14757747	chr21:14418376-14418489
chr18:14757945-14758091	chr21:14418688-14418834
chr2:98123698-98123728	chr2:89104692-89104722
chr2:98140080-98140130	chr2:89096598-89096648
chr2:98148573-98149047	chr2:89091729-89092215
chr2:98152562-98153159	chr2:89087629-89088231
chr2:98173199-98173795	chr2:89085786-89086380
chr2:98175061-98175657	chr2:89083915-89084520
chr2:98176927-98177523	chr2:89082050-89082642
chr2:98205787-98206348	chr2:89065343-89065913
chr2:98124120-98124457	chr2:89103964-89104300
chr2:98124533-98124728	chr2:89103693-89103888
chr2:98125843-98126048	chr2:89102377-89102583
chr2:98126196-98126396	chr2:89102034-89102229
chr2:98127400-98127600	chr2:89100822-89101030
chr2:98127886-98128509	chr1:168215630-168216238
chr2:98139588-98139641	chr2:89097087-89097140
chr2:98139717-98140049	chr2:89096679-89097011
chr2:97779276-97779450	chrY:28555712-28555889
chr2:97779611-97779873	chrY:28556030-28556292
chr2:97783600-97784454	chrY:28559994-28560849
chr2:97788423-97788653	chrY:28564794-28565020
chr2:97788670-97788930	chrY:28565037-28565300
chr2:97789996-97790534	chrY:28566340-28566864
chr22:38227789-38227956	chr10:45646733-45646890
chr22:38234500-38234614	chr10:45647237-45647335
chr18:12122101-12122715	chr22:17159970-17160583
chr18:12123935-12124519	chr22:17157882-17158466
chr18:12125258-12126582	chr22:17155812-17157136
chr18:12127546-12128138	chr22:17154254-17154843
chr15:69072219-69072492	chr15:35530200-35530461
chr10:47664963-47665336	chr10:47644518-47644885
chr10:47677838-47677985	chr10:47625975-47626122
chr10:47678237-47678308	chr10:47625668-47625740
chr10:47678437-47678916	chr10:47625040-47625539
chr10:47680148-47680190	chr10:47623680-47623722
chr10:47680329-47680638	chr10:47623199-47623506
chr10:47682609-47682705	chr10:47621980-47622086
chr10:47682798-47683101	chr10:47621570-47621863
chr10:47684271-47684367	chr10:47620300-47620396
chr10:47684429-47684733	chr10:47619946-47620249
chr10:47684750-47684752	chr10:47619927-47619929
chr10:47667054-47667069	chr10:47642408-47642423
chr10:47700636-47700987	chr10:47605444-47605784
chr10:47701098-47701242	chr10:47605310-47605445
chr10:47701258-47701498	chr10:47605061-47605294
chr10:47701499-47701542	chr10:47605017-47605060
chr10:47667384-47667688	chr10:47641802-47642106
chr10:47668287-47668408	chr10:47641128-47641248
chr10:47668427-47668534	chr10:47640647-47640757
chr10:47668835-47668987	chr10:47640172-47640320
chr10:47669035-47669138	chr10:47640021-47640124
chr10:47669192-47669498	chr10:47639661-47639967
chr10:47673757-47674256	chr10:47634545-47635043
chrX:15845247-15845506	chr7:97067144-97067392
chr19:45417948-45418406	chr19:45430044-45430490
chr19:45419508-45419814	chr19:45431113-45431417
chr19:45419826-45419927	chr19:45431429-45431529
chr19:45422229-45422568	chr19:45434056-45434405
chr19:45422649-45422687	chr19:45434794-45434823
chr3:121304745-121304866	chr17:30478035-30478154
chr17:36625184-36626345	chr16:33738406-33739565
chr17:36654455-36654952	chr16:33709685-33710182
chr17:36654973-36655393	chr16:33709244-33709664
chr17:36627903-36628447	chr16:33736312-33736856
chr17:36633619-36634337	chr16:33730349-33731063
chr17:36635476-36636324	chr16:33728353-33729210
chr17:36638062-36639119	chr16:33725559-33726609
chr17:36642102-36642581	chr16:33722090-33722577
chr17:36646142-36646992	chr16:33717663-33718522
chr17:36647447-36647973	chr16:33716685-33717211
chr17:36653826-36654268	chr16:33710369-33710813
chr17:43506653-43506968	chr17:66195736-66196042
chr17:43506978-43507381	chr17:66195363-66195737
chr17:43507431-43507845	chr17:66194861-66195285
chr3:48964887-48965254	chr18:26231599-26231947
chr3:49004547-49004717	chr18:26232080-26232231
chr3:49005956-49006096	chr18:26232230-26232353
chr3:49008015-49008146	chr18:26232352-26232464
chr3:49011150-49011259	chr18:26232484-26232583
chr3:49016903-49017075	chr18:26232654-26232807
chr3:49017774-49017937	chr18:26232806-26232950
chr3:49020620-49020903	chr18:26233103-26233377
chr7:102724111-102724287	chr3:94226176-94226333
chr7:102727066-102727219	chr3:94226043-94226177
chr7:102732911-102733108	chr3:94225866-94226044
chr7:102738733-102739200	chr3:94225409-94225867
chr10:28250296-28250844	chr10:27577329-27577948
chr10:28257651-28258147	chr10:27570016-27570512
chr10:28259836-28259927	chr10:27568273-27568355
chr10:28259956-28260442	chr10:27567798-27568274
chr10:28270194-28270211	chr10:27558319-27558327
chr10:28283647-28284271	chr10:27551723-27552349
chr3:137947749-137947861	chr9:38454236-38454329
chr3:137956312-137956423	chr9:38454016-38454108
chr3:137960611-137960834	chr9:38453759-38453963
chr3:137963918-137964034	chr9:38453663-38453760
chr3:137991797-137991961	chr9:38453177-38453322
chr3:138003274-138003377	chr9:38452980-38453073
chr3:138009375-138009492	chr9:38452811-38452909
chr3:138014768-138014934	chr9:38452273-38452429
chrX:2825166-2825873	chrY:14498564-14499258
chrX:2847190-2847295	chrY:14474847-14474942
chrX:2847414-2847516	chrY:14474625-14474735
chrX:2826561-2827083	chrY:14495910-14496413
chrX:2827657-2827718	chrY:14495266-14495327
chrX:2827731-2828220	chrY:14494743-14495242
chrX:2828499-2829034	chrY:14493938-14494472
chrX:2838599-2838964	chrY:14487727-14488091
chrX:2839743-2840260	chrY:14486473-14486992
chrX:2843456-2844006	chrY:14482747-14483305
chrX:2847072-2847187	chrY:14474941-14475047
chrX:2852672-2853323	chrY:14467774-14468423
chrX:2854582-2855104	chrY:14461701-14462222
chrX:2855935-2856498	chrY:14460321-14460902
chrX:2989866-2990416	chrY:14378376-14378931
chrX:2994388-2994910	chrY:14374491-14375013
chrX:3030399-3030628	chrY:14373003-14373222
chrX:3030660-3030776	chrY:14372895-14373004
chrX:3030783-3030797	chrY:14372857-14372871
chrX:15262427-15262759	chr15:93339666-93339991
chrX:15266855-15267040	chr15:93339501-93339667
chrX:15268541-15268698	chr15:93339298-93339436
chrX:15270375-15270531	chr15:93339154-93339299
chrX:15272851-15272979	chr15:93339046-93339155
chrX:15287893-15288143	chr15:93338738-93338969
chr7:65546589-65546799	chr22:23995538-23995732
chr7:65546808-65546969	chr22:23995397-23995539
chr7:65547077-65547527	chr22:23994968-23995398
chr7:65547912-65548012	chr22:23994814-23994916
chr7:65548033-65548361	chr22:23994465-23994793
chr7:65551371-65551580	chr22:23991894-23992092
chr7:65557524-65557692	chr22:23991580-23991739
chr7:65557713-65558099	chr22:23991194-23991579
chr7:97483691-97483822	chr8:47502756-47502889
chr7:97488862-97488910	chr8:47508004-47508052
chr7:97493370-97493485	chr8:47511853-47511972
chr7:97493814-97494008	chr8:47512302-47512498
chr7:97498019-97498163	chr8:47525700-47525842
chr7:97483989-97484192	chr8:47503053-47503255
chr7:97484464-97484661	chr8:47503523-47503721
chr7:97484772-97484971	chr8:47503832-47504031
chr7:97485801-97485915	chr8:47504867-47504985
chr7:97486126-97486328	chr8:47505206-47505392
chr7:97487389-97487587	chr8:47506538-47506734
chr7:97488341-97488522	chr8:47507477-47507661
chr7:97488712-97488860	chr8:47507851-47508002
chr12:51213491-51213591	chr6:93596936-93597034
chr5:115167311-115167446	chr2:223769165-223769306
chr5:115173324-115173430	chr2:223769484-223769582
chrX:107374478-107374598	chrX:82253897-82253998
chrX:107396860-107397142	chrX:82254194-82254459
chr1:169094107-169094286	chr4:42031452-42031612
chr1:169096451-169096602	chr4:42031611-42031753
chr1:169100516-169100993	chr4:42031874-42032347
chr3:141622452-141622596	chr2:60962628-60962755
chr3:141625996-141626126	chr2:60962518-60962629
chr3:141632483-141632688	chr2:60962333-60962519
chr3:141640806-141640918	chr2:60962192-60962285
chr3:141644365-141644743	chr2:60961824-60962193
chr12:57032883-57033007	chr2:98823979-98824093
chr12:57033755-57033882	chr2:98823770-98823887
chr12:57036234-57036372	chr2:98823556-98823687
chr12:57036448-57036605	chr2:98823410-98823557
chr12:57038553-57038749	chr2:98822918-98823095
chr12:57038945-57039047	chr2:98822827-98822919
chr10:7838998-7839158	chr14:54458483-54458624
chr10:7840950-7841161	chr14:54458292-54458484
chr10:7841718-7841886	chr14:54458144-54458293
chr10:7844221-7844398	chr14:54457921-54458079
chr10:7844710-7844828	chr14:54457823-54457922
chr10:105151924-105152050	chrX:73393810-73393933
chr10:105152117-105152249	chrX:73393698-73393811
chr21:27096842-27097000	chrY:6769372-6769511
chr22:18075239-18075515	chr1:43369516-43369783
chr22:18080949-18081066	chr1:43369334-43369432
chr22:18095966-18096098	chr1:43368998-43369111
chr20:54961378-54961506	chr1:220441005-220441133
chr7:99564425-99565109	chr7:99584632-99585363
chr7:99565732-99566045	chr7:99583403-99583718
chr3:160803346-160803349	chr2:69826289-69826292
chr3:160803379-160803653	chr2:69825979-69826253
chr3:160803679-160804151	chr2:69825169-69825645
chr1:235617460-235617563	chr6:130123075-130123168
chr1:235621902-235622028	chr6:130122778-130122885
chr1:235634182-235634285	chr6:130122604-130122698
chr1:235643362-235643465	chr6:130122512-130122605
chr1:235647629-235647775	chr6:130122374-130122510
chr1:235658033-235658151	chr6:130122079-130122188
chr11:62382972-62383282	chr3:160171092-160171394
chr11:62383968-62384280	chr3:160170800-160171093
chr11:62384450-62384837	chr3:160170421-160170801
chr2:62449332-62449463	chrX:99142850-99142972
chr2:62449940-62450328	chrX:99141956-99142347
chr2:62450385-62450641	chrX:99141653-99141899
chr5:17275308-17275568	chr13:23471908-23472155
chr5:17275711-17276077	chr13:23471406-23471776
chr5:17276122-17276209	chr13:23471260-23471346
chr1:115110990-115111077	chr11:82845610-82845704
chr19:50169928-50170064	chr3:131245371-131245488
chr19:50170263-50170427	chr3:131245487-131245632
chr19:50173460-50173945	chr3:131245710-131246181
chr6:136582047-136582262	chr5:110283523-110283731
chr6:136600892-136601026	chr5:110286378-110286493
chr6:136582392-136582626	chr5:110283730-110283945
chr6:136588167-136588313	chr5:110283944-110284080
chr6:136589289-136589487	chr5:110284080-110284265
chr6:136590567-136590754	chr5:110284264-110284432
chr6:136594211-136594337	chr5:110284527-110284634
chr6:136596661-136596852	chr5:110284633-110284805
chr6:136596973-136597658	chr5:110284804-110285468
chr6:136598995-136599926	chr5:110285467-110286379
chrX:39923057-39923182	chrY:21635987-21636106
chrX:39931046-39931143	chrY:21642724-21642819
chrX:39932358-39932469	chrY:21644701-21644812
chrX:39933085-39933294	chrY:21645440-21645646
chr22:23651460-23651596	chr22:22972385-22972521
chr22:23652632-23652750	chr22:22973553-22973671
chr4:104000658-104000922	chr6:99623302-99623557
chr4:104003227-104003342	chr6:99623207-99623303
chr4:104006497-104006631	chr6:99623034-99623149
chr4:104012323-104012453	chr6:99622865-99622976
chr4:104013747-104013864	chr6:99622768-99622866
chr4:104017330-104017446	chr6:99622591-99622691
chr5:70835371-70835485	chr18:75149083-75149178
chr5:70858228-70858352	chr18:75147339-75147453
chr5:70860578-70860912	chr18:75147008-75147338
chr5:70837270-70837517	chr18:75148854-75149084
chr5:70837919-70838100	chr18:75148693-75148855
chr5:70840171-70840342	chr18:75148542-75148694
chr5:70840853-70841053	chr18:75148362-75148543
chr5:70845325-70845443	chr18:75148080-75148188
chr5:70848939-70849141	chr18:75147882-75148081
chr5:70855796-70856071	chr18:75147583-75147839
chr5:70858088-70858199	chr18:75147482-75147584
chr6:107389856-107390045	chr10:52420096-52420275
chr10:13522916-13523134	chrX:101960946-101961151
chr7:93623347-93623708	chr7:150447022-150447366
chr7:93628471-93628597	chr7:150446851-150446967
chrX:102003723-102005074	chr14:81448132-81449478
chrX:102005076-102005767	chr14:81449492-81450217
chr12:51696464-51696576	chr4:83196263-83196356
chr10:102035127-102035256	chrX:63946537-63946657
chr10:102039885-102039995	chrX:63946669-63946760
chr10:102040698-102040818	chrX:63946774-63946885
chr10:22615393-22615500	chrX:67012625-67012722
chr10:22616868-22616979	chrX:67012342-67012437
chr6:7861712-7861841	chr22:22540359-22540478
chr6:7880211-7880315	chr22:22540750-22540845
chr6:7880523-7880643	chr22:22540961-22541083
chr10:88635613-88635850	chr6:129480200-129480418
chr10:88649806-88649991	chr6:129480035-129480201
chr10:88651873-88651996	chr6:129479932-129480036
chr10:88659541-88659654	chr6:129479838-129479933
chr10:88659771-88659893	chr6:129479736-129479839
chr17:65889285-65890452	chr17:62757854-62759028
chrX:154305433-154305573	chr5:175735257-175735381
chrX:154317526-154317637	chr5:175735467-175735559
chrX:154344319-154344471	chr5:175735686-175735819
chrX:154348261-154348452	chr5:175735861-175736033
chr5:878283-878490	chr5:767330-767527
chr5:878570-878671	chr5:767607-767712
chr5:878720-878802	chr5:767761-767843
chr5:879708-879822	chr5:768749-768863
chr1:92459684-92459818	chrX:95592788-95592903
chr1:92467592-92467714	chrX:95592686-95592789
chr1:92469958-92470183	chrX:95592481-95592687
chr1:92470663-92470823	chrX:95592331-95592482
chr1:92479754-92479988	chrX:95592084-95592299
chr7:97911086-97911254	chr1:100678836-100678985
chr7:97911647-97911769	chr1:100678984-100679087
chr7:97920406-97920755	chr1:100679086-100679427
chr5:34918460-34918584	chr8:52348317-52348434
chr5:34923225-34923347	chr8:52348721-52348824
chr5:34924939-34925089	chr8:52348823-52348954
chr5:34925319-34925459	chr8:52348953-52349074
chr11:13410177-13410204	chr12:53144079-53144106
chr11:13410214-13410700	chr12:53143592-53144069
chr11:13424706-13424835	chr12:53143483-53143593
chr11:13427198-13427413	chr12:53143264-53143460
chr14:105715007-105715332	chr1:24229291-24229615
chr14:105715481-105715592	chr1:24229121-24229213
chr14:105715684-105715825	chr1:24229000-24229122
chr14:105715966-105717102	chr1:24227867-24229001
chr14:105717128-105717209	chr1:24227755-24227841
chr14:93760488-93760603	chr10:13198967-13199082
chr12:92537655-92538225	chr12:9287807-9288372
chr12:92539157-92539259	chr12:9287713-9287805
chr12:92539426-92539511	chr12:9287468-9287549
chr21:18966210-18966219	chrX:127257667-127257676
chr11:111365687-111365710	chr5:24786755-24786780
chr10:124914421-124914553	chr7:108634967-108635089
chr10:124917232-124917410	chr7:108634642-108634801
chr10:124919916-124920087	chr7:108634491-108634643
chr10:124921741-124921936	chr7:108634316-108634492
chr10:124922114-124922356	chr7:108634094-108634317
chr10:124924555-124924761	chr7:108633898-108634095
chr2:201680056-201680171	chr3:172144702-172144810
chr11:62430527-62430642	chr9:19705555-19705652
chr11:62430699-62430815	chr9:19705459-19705556
chr17:43045017-43045127	chr16:34809706-34809814
chr19:6714639-6714657	chr19:10167715-10167733
chr16:87921534-87922078	chr16:29629905-29630449
chr16:87925204-87925760	chr16:29633838-29634394
chr16:87935317-87935780	chr16:29644464-29644926
chr16:87935830-87936326	chr16:29644976-29645472
chr16:87938191-87938710	chr16:29647330-29647849
chr2:231663446-231663567	chr5:59926693-59926804
chr18:21723052-21723176	chr3:54082721-54082845
chr18:21735737-21736013	chr3:54082380-54082636
chr18:21739422-21739622	chr3:54082188-54082381
chr18:21739649-21740041	chr3:54081773-54082161
chr1:40524999-40525137	chr10:44101590-44101718
chr1:40525726-40525854	chr10:44101482-44101591
chr1:40529886-40530051	chr10:44101263-44101409
chr1:40531876-40532000	chr10:44101072-44101177
chr1:40533200-40533310	chr10:44100972-44101073
chr1:40535350-40535484	chr10:44100780-44100895
chr1:40535819-40535961	chr10:44100604-44100727
chr1:40536494-40536661	chr10:44100374-44100522
chr1:40537111-40537405	chr10:44100096-44100375
chr6:17421772-17421878	chr14:89757846-89757943
chr6:17426807-17426934	chr14:89757713-89757821
chr6:17507394-17507497	chr14:89757559-89757653
chr6:17514091-17514195	chr14:89757324-89757418
chr6:17539512-17539614	chr14:89757218-89757312
chr6:17543056-17543194	chr14:89756841-89756960
chr6:17551685-17551792	chr14:89756649-89756755
chr6:17556790-17556873	chr14:89756361-89756445
chr11:3059337-3059441	chr15:69042214-69042309
chr15:44581027-44581561	chr13:20138716-20139240
chr15:44620873-44620991	chr13:20138556-20138661
chr15:44624173-44624287	chr13:20138462-20138557
chr15:44629951-44630113	chr13:20138320-20138463
chr15:44671876-44671993	chr13:20138141-20138239
chr15:44672990-44673182	chr13:20137969-20138142
chr15:44695072-44695260	chr13:20137801-20137970
chr15:44705521-44705804	chr13:20137526-20137802
chr11:104899793-104899958	chr11:104936138-104936306
chr11:104905352-104905402	chr11:104941748-104941798
chr11:104905633-104905716	chr11:104942025-104942108
chr11:104905721-104905895	chr11:104942113-104942287
chr11:104900344-104900526	chr11:104936690-104936872
chr11:104900538-104900789	chr11:104936884-104937134
chr11:104900902-104901037	chr11:104937296-104937431
chr11:104901043-104901269	chr11:104937437-104937663
chr11:104901386-104901430	chr11:104937780-104937824
chr11:104901844-104901945	chr11:104938228-104938329
chr11:104904869-104904982	chr11:104941265-104941378
chr11:104905213-104905341	chr11:104941609-104941737
chr4:185552202-185552324	chr1:71126344-71126457
chr4:185552911-185553105	chr1:71126456-71126631
chr4:185553412-185553561	chr1:71126630-71126760
chr4:185556458-185556577	chr1:71126780-71126895
chr15:43922698-43922726	chr15:44019083-44019113
chr15:43939914-43940464	chr15:44037015-44037570
chr15:43940819-43941232	chr15:44038238-44038649
chr15:43922755-43923130	chr15:44019225-44019609
chr15:43924196-43925332	chr15:44020671-44021796
chr15:43927357-43928601	chr15:44023814-44025073
chr15:43928607-43928617	chr15:44025098-44025108
chr15:43930901-43931426	chr15:44027426-44027945
chr15:43931640-43932196	chr15:44028152-44028708
chr15:43932321-43932894	chr15:44028833-44029406
chr15:43939047-43939865	chr15:44036149-44036966
chr12:54635357-54635516	chr3:88144380-88144537
chr12:54635582-54635696	chr3:88144601-88144706
chr12:54639888-54639992	chr3:88144705-88144799
chr12:54645920-54646021	chr3:88144896-88144988
chr12:54651287-54651388	chr3:88144987-88145078
chr2:130897606-130897836	chr22:20941980-20942199
chr2:130898012-130898144	chr22:20942365-20942496
chr2:130898526-130898552	chr22:20942916-20942942
chr2:130898714-130898816	chr22:20943087-20943179
chr2:130898826-130899069	chr22:20943201-20943437
chr2:130899578-130899710	chr22:20943947-20944090
chr2:130899846-130900154	chr22:20944167-20944461
chr2:130900258-130900361	chr22:20944564-20944664
chr2:130900470-130900937	chr22:20944776-20945244
chr15:59399534-59399657	chr7:7949968-7950072
chr15:59399744-59399876	chr7:7949855-7949969
chr15:59406630-59406820	chr7:7949685-7949856
chr15:59408876-59409131	chr7:7949291-7949527
chr15:59409414-59409576	chr7:7949149-7949292
chr15:59415704-59415836	chr7:7949037-7949150
chr15:59416955-59417243	chr7:7948748-7949038
chrX:50054021-50054122	chr5:26740846-26740938
chrX:50094605-50094704	chr5:26739856-26739955
chr12:4383006-4383120	chr11:63010353-63010467
chr12:4385203-4385395	chr11:63010884-63011066
chr12:4387914-4388061	chr11:63011065-63011203
chr12:4409221-4409375	chr11:63011549-63011706
chr5:162866252-162866527	chr6:133019917-133020177
chr5:162868071-162868311	chr6:133020176-133020407
chr5:162869388-162869505	chr6:133020625-133020742
chr5:86690205-86690313	chr4:182826884-182826983
chr5:86695200-86695332	chr4:182827041-182827154
chr5:86700652-86700808	chr4:182827226-182827372
chr5:86703906-86704013	chr4:182827503-182827601
chr2:135711005-135711305	chr1:111550397-111550695
chr21:30432851-30432993	chr1:146674922-146675055
chr21:30434439-30434575	chr1:146675303-146675420
chr21:30435664-30435863	chr1:146675575-146675755
chr21:30437281-30437436	chr1:146675754-146675891
chr21:30439202-30439404	chr1:146675952-146676135
chr21:30439868-30440036	chr1:146676134-146676283
chr21:30442558-30442670	chr1:146676363-146676456
chr19:43858772-43858785	chr19:43884272-43884276
chr19:43859612-43860460	chr19:43882626-43883471
chr19:43864216-43864757	chr19:43878326-43878867
chr19:43865094-43865822	chr19:43877271-43877989
chr19:43866114-43866672	chr19:43876693-43877244
chr1:207925539-207925743	chr1:207818560-207818768
chr1:207925829-207925854	chr1:207818864-207818880
chr1:207930158-207930769	chr1:207825691-207826307
chr1:207930846-207931187	chr1:207826384-207826731
chr1:207932783-207933269	chr1:207828333-207828829
chr1:207934393-207934991	chr1:207830268-207830860
chr6:14131744-14131841	chr6:27529321-27529415
chr6:14131848-14131990	chr6:27529183-27529315
chrY:2559201-2559361	chrY:2477243-2477416
chrY:2559541-2559659	chrY:2477601-2477733
chr1:43824826-43825076	chr9:89626518-89626749
chr1:43828609-43828859	chr9:89627884-89628135
chr1:43825149-43825317	chr9:89626748-89626897
chr1:43825383-43825501	chr9:89626896-89626995
chr1:43825628-43825778	chr9:89626994-89627125
chr1:43825853-43826068	chr9:89627124-89627320
chr1:43826157-43826269	chr9:89627319-89627412
chr1:43826388-43826637	chr9:89627411-89627641
chr1:43826778-43826923	chr9:89627640-89627766
chr1:43827852-43827991	chr9:89627765-89627885
chr2:37872765-37873867	chr19:23567197-23568296
chr12:58144697-58144875	chr1:105976920-105977088
chr12:58145374-58145494	chr1:105976623-105976733
chr7:150750972-150751195	chr8:123782300-123782509
chr7:150752356-150752472	chr8:123781992-123782089
chr7:150752830-150752947	chr8:123781821-123781919
chr5:68553857-68553989	chr2:158067643-158067756
chr5:68555633-68555771	chr2:158067525-158067644
chr5:68558019-68558140	chr2:158067424-158067526
chr5:68568707-68568876	chr2:158067196-158067346
chr5:68572357-68572525	chr2:158067048-158067197
chr5:68572921-68573148	chr2:158066841-158067049
chr13:26967503-26967654	chr2:113690299-113690431
chr13:26975593-26975768	chr2:113690744-113690900
chr13:26978081-26978418	chr2:113690899-113691228
chr3:133292792-133293026	chr3:96495691-96495912
chr3:133293031-133293131	chr3:96495918-96496008
chr3:133302844-133303000	chr3:96496076-96496216
chr3:133305401-133305576	chr3:96496215-96496383
chr3:133306729-133307403	chr3:96496382-96497044
chr6:4891933-4892041	chr3:16735611-16735710
chr6:4892105-4892218	chr3:16735450-16735562
chr6:4892243-4892347	chr3:16735321-16735425
chr6:4954121-4954236	chr3:16734305-16734411
chr9:135937180-135937655	chr9:135957738-135958213
chr9:135943858-135944846	chr9:135959642-135960630
chr9:135945647-135946613	chr9:135961444-135962413
chr9:135947031-135947292	chr9:135962533-135962789
chr11:787926-788039	chr14:104917857-104917970
chr11:788078-788671	chr14:104917226-104917818
chr4:68338185-68338405	chr12:89896645-89896846
chr4:68379782-68380418	chr12:89894705-89895323
chr4:68383866-68384088	chr12:89894484-89894706
chr4:68384926-68385232	chr12:89894197-89894484
chr4:68396524-68396644	chr12:89894097-89894198
chr4:68405549-68405662	chr12:89894004-89894098
chr4:68411046-68411273	chr12:89893666-89893886
chr4:68340597-68340707	chr12:89896555-89896646
chr4:68355675-68355850	chr12:89896400-89896556
chr4:68357888-68358003	chr12:89896305-89896401
chr4:68358577-68358728	chr12:89896171-89896306
chr4:68359595-68359719	chr12:89896067-89896172
chr4:68372498-68372665	chr12:89895780-89895928
chr4:68374524-68374833	chr12:89895491-89895781
chr4:68378109-68378298	chr12:89895322-89895492
chrX:100382027-100382728	chr13:19700526-19701215
chrX:100382778-100382854	chr13:19701264-19701340
chrX:100383523-100383763	chr13:19701776-19702008
chrX:100383767-100384025	chr13:19702007-19702285
chrX:100384828-100385262	chr13:19703020-19703458
chrX:100386978-100387478	chr13:19705208-19705719
chrX:100399852-100400261	chr13:19713421-19713824
chrX:100400264-100400373	chr13:19713827-19713938
chr1:243289550-243290240	chr4:119474765-119475455
chr1:243335798-243336348	chr4:119427757-119428309
chr1:243348880-243349924	chr4:119414156-119415199
chr1:243354119-243354996	chr4:119409082-119409959
chr1:243362161-243362696	chr4:119401263-119401794
chr1:243363619-243364337	chr4:119399621-119400339
chr1:243374987-243375466	chr4:119388544-119389023
chr1:243291350-243291802	chr4:119473193-119473651
chr1:243292461-243292955	chr4:119472033-119472527
chr1:243299244-243299733	chr4:119465272-119465759
chr1:243303038-243303609	chr4:119461167-119461970
chr1:243305387-243305965	chr4:119458815-119459388
chr1:243319322-243319957	chr4:119444167-119444800
chr1:243327385-243329618	chr4:119434491-119436727
chr1:243332729-243333256	chr4:119430858-119431381
chr6:109475021-109475160	chr10:72149638-72149758
chr6:109480459-109480675	chr10:72149997-72150194
chr6:109481764-109481977	chr10:72150193-72150387
chr16:55854083-55854159	chr16:55807547-55807623
chr16:55854355-55854539	chr16:55807167-55807351
chr16:55854542-55854591	chr16:55807114-55807163
chr16:55855079-55855162	chr16:55806544-55806626
chr16:55855412-55855633	chr16:55806079-55806301
chr16:55862478-55863086	chr16:55798407-55799024
chr16:55866715-55867167	chr16:55794354-55794806
chr16:55886763-55887140	chr22:23701763-23702132
chr16:55890088-55890557	chr22:23705089-23705568
chr16:55893258-55893799	chr22:23708258-23708795
chr16:55895123-55895566	chr22:23710764-23711208
chr16:55895589-55895628	chr22:23711231-23711270
chr16:55897169-55897564	chr22:23712464-23712861
chr16:55899674-55899703	chr22:23715578-23715607
chr16:55899781-55900228	chr22:23715686-23716131
chr16:55903322-55903856	chr22:23718867-23719398
chr16:89712928-89713052	chr1:28013343-28013457
chr20:32436261-32436460	chr14:55765513-55765693
chr20:32438747-32438880	chr14:55765692-55765806
chr20:32439870-32440021	chr14:55765805-55765937
chr20:32441427-32441565	chr14:55765991-55766121
chr16:69152057-69153625	chrX:44493622-44495165
chr16:69153634-69154563	chrX:44492712-44493623
chr16:57462881-57463202	chr18:24180194-24180508
chr16:57465053-57465189	chr18:24179995-24180112
chr16:57467949-57468136	chr18:24179751-24179919
chr16:57473085-57473256	chr18:24179524-24179676
chr16:57474674-57474908	chr18:24179310-24179525
chr3:9908585-9909079	chr3:10059365-10059855
chr3:9911365-9911792	chr3:10065043-10065470
chr10:60036862-60037090	chr2:20026035-20026244
chr10:60047308-60047610	chr2:20026243-20026535
chr13:53035225-53035328	chr14:21581162-21581264
chr13:53035467-53035632	chr14:21580857-21581022
chr13:53039436-53039608	chr14:21579071-21579233
chr13:53048076-53048227	chr14:21578701-21578842
chr14:103986289-103986392	chr16:46876625-46876719
chr14:103988353-103988524	chr16:46878203-46878355
chr4:170583672-170584280	chr9:15070188-15070790
chr4:170584338-170584465	chr9:15070065-15070189
chr4:170584533-170584968	chr9:15069609-15070039
chr4:170601097-170601558	chr9:15047696-15048148
chr4:170608625-170609108	chr9:15037091-15040997
chr4:170609993-170610581	chr9:15035585-15036196
chr4:170618139-170619085	chr9:15033991-15034917
chr19:7794443-7794650	chr19:7855113-7855320
chr19:7795058-7795175	chr19:7854259-7854376
chr19:7795215-7796045	chr19:7853382-7854205
chr19:7796046-7797110	chr19:7852309-7853368
chr6:31698418-31698698	chr12:121352849-121353127
chr6:31699986-31700178	chr12:121352582-121352764
chr1:155232808-155233202	chr7:23624481-23624865
chr1:155233731-155233843	chr7:23624864-23624957
chr1:155234426-155234577	chr7:23625118-23625250
chr1:155235642-155235755	chr7:23625249-23625343
chr1:155236509-155236696	chr7:23625342-23625510
chr1:155237793-155237925	chr7:23625509-23625622
chr1:155240601-155240778	chr7:23625817-23625977
chr15:74918195-74918318	chr1:248099957-248100070
chr15:74922035-74922142	chr1:248099394-248099492
chr15:74922281-74922424	chr1:248099120-248099260
chr11:77330641-77330758	chr6:54349941-54350039
chr11:77333545-77333725	chr6:54350038-54350199
chr11:77335998-77336125	chr6:54350198-54350306
chr11:77336754-77336871	chr6:54350305-54350406
chr11:77340801-77340956	chr6:54350405-54350541
chr17:2595046-2595204	chr18:29776248-29776387
chr17:2595647-2595753	chr18:29776486-29776582
chr1:95363097-95363287	chr6:6535873-6536060
chr1:95363303-95363407	chr6:6535754-6535858
chr1:95363453-95363653	chr6:6535531-6535722
chr1:95364920-95365083	chr6:6535388-6535532
chr1:95367684-95367822	chr6:6535143-6535272
chr4:78641384-78641807	chr15:56297707-56298121
chr4:78647310-78647532	chr15:56298120-56298323
chr4:78649996-78650247	chr15:56298322-56298554
chr4:78652532-78652702	chr15:56298553-56298704
chr4:78663284-78663463	chr15:56298703-56298863
chr4:78665865-78666041	chr15:56298862-56299019
chr6:33148627-33149054	chr6:33071454-33071879
chr6:33149117-33149147	chr6:33071942-33071972
chr6:33156178-33156353	chr6:33073787-33073954
chr6:33156450-33156501	chr6:33074052-33074107
chr6:33156554-33156646	chr6:33074159-33074248
chr6:33156851-33157075	chr6:33074450-33074664
chr6:33157219-33157321	chr6:33074791-33074884
chr1:175914088-175914318	chr18:8414285-8414505
chr1:175956069-175956250	chr18:8414080-8414242
chr1:175957414-175957558	chr18:8413956-8414081
chr1:175958487-175958627	chr18:8413836-8413957
chr1:175996699-175996836	chr18:8413719-8413837
chr1:176012839-176012968	chr18:8413531-8413641
chr1:176015311-176015473	chr18:8413389-8413532
chr1:176050332-176050435	chr18:8413254-8413348
chr1:176131994-176132134	chr18:8412757-8412878
chr8:67955318-67955419	chr6:93801534-93801644
chr8:67955438-67955561	chr6:93801663-93801778
chr8:67970309-67970458	chr6:93802094-93802225
chr8:67971438-67971692	chr6:93802224-93802461
chr8:67974082-67974224	chr6:93802460-93802592
chr2:198324641-198324817	chr5:82576194-82576351
chr2:198327337-198327463	chr5:82575999-82576115
chr2:198338471-198338825	chr5:82575568-82575900
chr2:198338843-198338848	chr5:82575568-82575569
chr17:53039893-53040289	chr6:28415397-28415784
chr17:53040659-53040802	chr6:28415274-28415398
chr17:53042047-53042225	chr6:28415116-28415275
chr17:53045634-53046063	chr6:28414693-28415117
chr3:119396041-119396232	chr13:47064989-47065170
chr15:75212605-75212786	chr14:52584730-52584892
chr15:75215972-75216123	chr14:52584599-52584731
chr15:75219099-75219239	chr14:52584478-52584600
chr15:75221448-75221587	chr14:52584359-52584479
chrX:77158122-77158269	chr20:34438667-34438805
chr5:85913787-85913955	chr13:49761733-49761894
chr5:85915157-85915319	chr13:49761591-49761734
chr5:85916471-85916593	chr13:49761489-49761592
chr17:28772529-28772985	chr17:26004842-26005295
chr8:145618659-145618814	chr22:32668912-32669048
chr8:145623683-145623844	chr22:32666540-32666682
chr8:145623921-145624022	chr22:32666437-32666535
chr8:145624160-145624270	chr22:32666338-32666429
chr8:145624969-145625110	chr22:32665914-32666036
chr8:145625371-145625487	chr22:32665729-32665826
chr8:145625551-145625682	chr22:32665618-32665730
chr8:145625741-145625901	chr22:32665477-32665619
chr8:145626068-145626190	chr22:32665366-32665478
chr8:145619592-145619779	chr22:32668348-32668522
chr8:145619852-145620022	chr22:32668198-32668349
chr8:145620094-145620224	chr22:32668069-32668199
chr8:145620641-145620779	chr22:32667760-32667879
chr8:145621555-145621662	chr22:32667664-32667761
chr8:145621803-145621964	chr22:32667468-32667614
chr8:145622414-145622640	chr22:32667169-32667380
chr8:145622694-145622885	chr22:32666998-32667170
chr19:6466519-6466627	chr3:1435849-1435947
chr19:6466983-6467226	chr3:1435572-1435824
chr1:17266717-17266788	chr1:16809570-16809641
chr1:17272553-17272784	chr1:16952963-16953193
chr1:159683502-159683646	chr1:159674982-159675125
chr22:25623619-25623970	chr22:25851478-25851819
chr22:25623979-25624152	chr22:25851818-25851982
chr22:25625202-25625745	chr22:25853025-25853568
chr22:25627370-25627915	chr22:25855182-25855717
chr22:25627917-25627939	chr22:25855716-25855729
chr22:37318249-37318416	chr22:37349599-37349764
chr22:37318421-37318525	chr22:37349491-37349594
chr22:37319215-37319473	chr22:37348888-37349146
chr22:37319477-37319595	chr22:37348770-37348884
chr22:37322054-37322252	chr22:37346537-37346735
chr5:148929627-148929754	chr15:37110109-37110219
chr5:148930721-148930727	chr15:37110477-37110491
chr19:1980395-1980402	chr9:5042439-5042444
chr20:23804678-23804788	chr20:23691972-23692082
chr5:138118853-138119068	chr5:114727779-114727977
chr5:138260929-138261105	chr5:114726189-114726346
chr5:138266148-138266352	chr5:114725896-114726081
chr5:138266507-138266634	chr5:114725789-114725897
chr5:138268282-138268410	chr5:114725622-114725731
chr5:138269480-138269978	chr5:114725128-114725623
chr5:138145714-138145902	chr5:114727609-114727780
chr5:138147861-138147999	chr5:114727491-114727610
chr5:138160206-138160493	chr5:114727224-114727492
chr5:138163201-138163417	chr5:114727017-114727223
chr5:138223166-138223334	chr5:114726790-114726939
chr5:138240025-138240137	chr5:114726698-114726791
chr5:138253421-138253593	chr5:114726543-114726699
chr5:138260186-138260404	chr5:114726345-114726544
chr10:16867227-16867281	chr10:45727718-45727772
chr7:148427042-148427325	chr5:127122623-127122896
chr7:148487390-148487541	chr5:127120829-127120961
chr7:148489805-148489919	chr5:127120735-127120830
chr7:148495654-148495780	chr5:127120496-127120604
chr7:148496358-148496482	chr5:127120392-127120497
chr7:148497577-148497874	chr5:127120105-127120393
chr7:148451140-148451250	chr5:127122427-127122527
chr7:148454062-148454250	chr5:127122259-127122428
chr7:148457418-148457591	chr5:127121954-127122123
chr7:148463640-148463823	chr5:127121791-127121955
chr7:148464698-148464851	chr5:127121658-127121792
chr7:148480864-148480993	chr5:127121549-127121659
chr7:148484069-148484172	chr5:127121303-127121397
chr7:148485660-148485777	chr5:127121034-127121141
chr4:74735240-74735347	chr4:74809890-74809997
chr4:74735367-74735534	chr4:74809713-74809870
chr2:218999763-219000024	chr2:218925643-218925901
chr2:219000049-219000807	chr2:218924861-218925618
chr19:41381397-41381498	chr19:41414174-41414275
chr19:41387506-41387710	chr19:41533019-41533223
chr19:41387766-41387909	chr19:41533278-41533421
chr19:41387965-41388159	chr19:41533477-41533671
chr19:41381688-41381967	chr19:41414467-41414745
chr19:41382402-41382602	chr19:41415106-41415306
chr19:41382662-41382773	chr19:41415366-41415475
chr19:41383182-41383319	chr19:41415885-41416019
chr19:41383556-41383686	chr19:41416250-41416380
chr19:41384530-41384738	chr19:41530044-41530242
chr19:41385788-41385836	chr19:41531288-41531336
chr19:41385880-41386030	chr19:41531400-41531549
chr1:155695683-155695898	chr1:155568579-155568784
chr1:155708017-155708135	chr2:172348425-172348543
chr12:51634114-51634253	chr2:203066479-203066599
chr12:51634644-51634910	chr2:203066231-203066480
chr12:51636103-51636630	chr2:203065728-203066232
chr7:87505847-87506102	chr10:65930566-65930811
chr7:87507356-87507549	chr10:65930393-65930567
chr7:87514282-87514483	chr10:65930212-65930394
chr7:87529525-87529672	chr10:65929806-65929934
chr7:87530066-87530203	chr10:65929689-65929807
chr7:87536492-87537678	chr10:65928513-65929690
chr10:14974824-14975154	chr10:15057350-15057671
chr10:14976178-14976974	chr10:15058706-15059494
chr10:14977261-14977393	chr10:15059799-15059931
chr10:14977405-14977763	chr10:15059992-15060352
chr10:14981608-14982068	chr10:15063603-15064058
chr11:108547801-108547978	chr9:84703148-84703306
chr19:14522314-14522418	chr13:23279957-23280055
chr10:70672905-70673045	chr3:154071366-154071487
chr12:124093247-124093384	chr12:11665699-11665825
chr12:124094473-124094679	chr12:11665824-11666011
chr12:124102317-124102429	chr12:11666338-11666440
chr12:124103226-124103392	chr12:11666451-11666607
chr12:124103966-124104279	chr12:11666606-11666901
chr12:124104578-124104693	chr12:11666970-11667081
chr11:46369098-46369378	chr13:44542457-44542718
chr11:46397390-46397511	chr13:44544468-44544570
chr11:46398609-46398771	chr13:44544757-44544900
chr11:46400528-46400670	chr13:44544974-44545097
chr11:46401367-46401697	chr13:44545214-44545534
chr11:46388828-46388959	chr13:44542717-44542829
chr11:46389191-46389306	chr13:44542828-44542924
chr11:46393026-46393160	chr13:44543200-44543315
chr11:46393612-46393726	chr13:44543387-44543482
chr11:46394309-46394443	chr13:44543628-44543743
chr11:46394499-46394660	chr13:44543742-44543884
chr11:46396470-46396604	chr13:44544153-44544268
chr11:46396970-46397191	chr13:44544267-44544469
chr17:57650276-57650796	chr17:58079409-58079928
chr17:57650900-57651815	chr17:58078396-58079305
chr17:57652500-57653032	chr17:58077191-58077723
chr17:57654426-57654926	chr17:58075298-58075798
chr17:57656632-57657440	chr17:58072792-58073600
chr17:57663313-57663794	chr17:58066427-58066902
chr17:57665056-57665614	chr17:58064609-58065165
chr17:57675897-57676412	chr17:58053816-58054331
chr17:57676535-57677044	chr17:58053184-58053693
chr1:182811668-182811820	chr13:77558978-77559111
chr1:182835563-182835728	chr13:77560310-77560456
chr1:182841461-182841636	chr13:77560540-77560696
chr1:182843979-182844096	chr13:77560695-77560796
chr1:182845174-182845407	chr13:77560795-77561009
chr1:182845570-182845684	chr13:77561008-77561103
chr1:182847145-182847316	chr13:77561175-77561327
chr1:182848372-182848553	chr13:77561326-77561488
chr1:182849619-182849753	chr13:77561487-77561602
chr1:182850388-182850567	chr13:77561601-77561761
chr1:182850641-182850790	chr13:77561760-77561890
chr1:182812416-182812574	chr13:77559110-77559249
chr1:182852262-182852511	chr13:77561889-77562121
chr1:182852642-182852779	chr13:77562120-77562238
chr1:182853736-182853957	chr13:77562237-77562439
chr1:182856206-182856769	chr13:77562438-77562992
chr1:182821356-182821486	chr13:77559248-77559359
chr1:182822437-182822552	chr13:77559359-77559464
chr1:182823153-182823319	chr13:77559463-77559610
chr1:182827228-182827380	chr13:77559660-77559793
chr1:182827673-182827784	chr13:77559792-77559884
chr1:182827856-182828039	chr13:77559883-77560047
chr1:182829117-182829323	chr13:77560124-77560311
chr2:233194322-233194397	chr2:233306560-233306627
chr2:233195268-233195686	chr2:233306626-233307066
chr2:233198349-233198391	chr2:233309393-233309441
chr2:233198508-233198647	chr2:233309559-233309683
chr2:233198846-233199034	chr2:233309777-233309964
chr2:233199063-233199645	chr2:233310014-233310596
chr2:233200282-233200442	chr2:233311233-233311383
chr2:233200624-233200784	chr2:233311416-233311581
chr2:233200978-233201246	chr2:233311775-233312041
chr19:49867895-49868021	chr20:29862009-29862125
chr19:49868755-49868917	chr20:29862124-29862267
chr19:49869040-49869150	chr20:29862266-29862357
chr19:49878023-49878380	chr20:29862409-29862775
chr3:38162998-38163263	chr3:38367718-38367994
chr3:38163369-38163477	chr3:38367152-38367256
chr14:55618526-55618640	chrY:6026948-6027056
chr14:75357746-75357879	chr1:76210020-76210134
chr14:75359525-75359697	chr1:76209868-76210021
chr14:75361001-75361119	chr1:76209693-76209795
chr14:75365059-75365210	chr1:76209562-76209694
chr14:75367757-75367941	chr1:76209239-76209405
chr14:75368886-75369233	chr1:76208904-76209240
chr19:14626551-14626993	chr2:192745692-192746129
chr19:14627269-14627870	chr2:192746128-192746723
chr19:14628942-14629196	chr2:192746722-192746966
chr1:28527063-28527893	chr14:35899711-35900534
[truncated: 2,922 more rows]
