# Supplementary material for: Systematic analysis of paralogous regions in 41,755 exomes uncovers clinically relevant variation
Source: Research Square preprint supplement (doi:10.21203/rs.3.rs-2302399/v1), 2022-11-29
Supplement: Supplementary file 17 [file STable3.xlsx]

## Sheet: STable3
Recurrence	IntroducedVariant
170	chr8_7307585_7307586_GA/-
170	chr8_7307593_7307593_A/G
170	chr8_7307749_7307749_G/C
170	chr8_7307818_7307818_G/C
170	chr8_7307890_7307890_G/-
170	chr8_7307901_7307901_T/A
170	chr8_7307911_7307911_A/T
170	chr8_7308324_7308324_A/T
170	chr8_7308386_7308386_T/C
170	chr8_7308410_7308410_G/A
170	chr8_7308484_7308484_C/A
170	chr8_7308493_7308493_G/A
170	chr8_7308529_7308529_C/T
170	chr8_7308670_7308670_T/C
170	chr8_7308675_7308675_A/G
170	chr8_7308682_7308682_C/T
170	chr8_7308706_7308706_C/T
170	chr8_7308798_7308798_A/G
1352	chr19_40373452_40373453_CC/-
1352	chr19_40373714_40373714_T/C
1352	chr19_40373838_40373838_A/G
1352	chr19_40373874_40373874_T/G
1352	chr19_40373950_40373950_G/T
1352	chr19_40374216_40374216_C/G
1352	chr19_40374229_40374229_C/A
1352	chr19_40374374_40374374_A/G
1352	chr19_40374380_40374380_G/A
1352	chr19_40374496_40374517_AGTTATATTCAGATAATAACCA/-
1352	chr19_40374564_40374564_T/C
198	chr2_241631260_241631262_GGG/-
198	chr2_241631267_241631267_A/G
198	chr2_241631311_241631311_T/A
198	chr2_241631312_241631312_C/T
198	chr2_241631376_241631376_G/A
198	chr2_241631390_241631390_G/A
198	chr2_241631459_241631459_T/C
198	chr2_241631462_241631462_G/-
198	chr2_241631476_241631476_C/G
198	chr2_241631483_241631483_G/T
198	chr2_241631616_241631616_T/C
198	chr2_241631647_241631647_C/G
198	chr2_241631668_241631668_T/C
198	chr2_241631717_241631717_T/C
198	chr2_241632185_241632185_G/C
198	chr2_241632405_241632405_G/A
1773	chr2_96698036_96698036_C/A
2516	chr4_75481492_75481501_ACCACTGTTT/-
2516	chr4_75481503_75481503_T/G
2516	chr4_75481509_75481509_T/C
2516	chr4_75481512_75481512_A/T
2516	chr4_75481513_75481513_A/T
2516	chr4_75481516_75481516_G/A
2516	chr4_75481518_75481518_T/A
2516	chr4_75481533_75481532_-/ATGAACAC
2516	chr4_75481987_75481987_C/T
2516	chr4_75482263_75482263_A/G
2516	chr4_75482752_75482751_-/TAACTGCA
284	chr7_6804670_6804678_GGAAGGCGC/-
284	chr7_6805437_6805437_T/C
284	chr7_6805524_6805524_T/C
284	chr7_6806115_6806115_T/G
284	chr7_6806588_6806587_-/TTTTGT
1165	chr9_84547446_84547446_A/-
497	chr9_84547505_84547506_CA/-
100	chr1_248721260_248721260_C/T
100	chr1_248722722_248722722_T/C
100	chr1_248722755_248722755_C/T
100	chr1_248722862_248722862_A/C
426	chr3_75785423_75785423_T/C
426	chr3_75785474_75785474_C/T
426	chr3_75785541_75785541_T/C
426	chr3_75785577_75785577_T/A
426	chr3_75785630_75785630_G/C
426	chr3_75785664_75785664_C/G
426	chr3_75785748_75785750_GGA/-
426	chr3_75786381_75786381_T/C
426	chr3_75786628_75786628_G/C
426	chr3_75786753_75786753_C/T
426	chr3_75786818_75786826_ACATTCATT/-
426	chr3_75786942_75786942_C/A
426	chr3_75787382_75787382_T/C
426	chr3_75787726_75787726_G/A
426	chr3_75787739_75787739_A/T
426	chr3_75788010_75788010_A/C
426	chr3_75788158_75788158_G/C
426	chr3_75788564_75788563_-/A
426	chr3_75788633_75788633_T/C
426	chr3_75788815_75788815_A/T
426	chr3_75788825_75788828_TCTT/-
426	chr3_75788839_75788839_T/G
834	chr5_69372304_69372304_A/G
834	chr5_69372353_69372353_T/C
834	chr5_69372501_69372501_G/A
834	chr5_69372616_69372616_G/A
834	chr5_69373081_69373081_A/G
2360	chr17_57656854_57656854_C/T
139	chr7_6016919_6016919_C/-
139	chr7_6017049_6017049_G/A
139	chr7_6017340_6017340_T/C
139	chr7_6017488_6017488_C/T
139	chr7_6017493_6017493_G/A
139	chr7_6017516_6017516_T/C
139	chr7_6017517_6017517_G/A
139	chr7_6017522_6017522_C/A
139	chr7_6017523_6017523_A/G
139	chr7_6017526_6017526_G/A
134	chr7_6018044_6018046_GGC/-
134	chr7_6018058_6018058_C/G
134	chr7_6018110_6018110_C/G
134	chr7_6018249_6018249_A/G
134	chr7_6018444_6018444_A/G
134	chr7_6018455_6018455_C/T
134	chr7_6018456_6018456_T/A
134	chr7_6018458_6018458_C/T
134	chr7_6018535_6018535_G/A
134	chr7_6018589_6018589_C/G
134	chr7_6018591_6018591_C/T
112	chr6_31973340_31973340_T/C
112	chr6_31973353_31973353_A/G
112	chr6_31973356_31973356_C/T
112	chr6_31973363_31973363_G/A
112	chr6_31973462_31973462_T/C
112	chr6_31973557_31973557_T/C
112	chr6_31973887_31973887_C/A
112	chr6_31973899_31973901_TTG/-
112	chr6_31973903_31973903_T/A
112	chr6_31973913_31973913_G/T
112	chr6_31973924_31973924_T/C
112	chr6_31973941_31973941_G/A
112	chr6_31973949_31973949_G/A
112	chr6_31973957_31973957_G/A
112	chr6_31973973_31973973_G/A
112	chr6_31973984_31973984_G/T
112	chr6_31973995_31973995_C/T
112	chr6_31974000_31974000_G/C
112	chr6_31974001_31974001_C/A
112	chr6_31974003_31974003_T/C
112	chr6_31974007_31974007_C/A
112	chr6_31974009_31974012_ATCC/-
112	chr6_31974021_31974021_A/C
112	chr6_31974033_31974032_-/G
112	chr6_31974047_31974047_T/G
112	chr6_31974048_31974048_C/G
112	chr6_31974049_31974049_A/T
112	chr6_31974052_31974052_A/G
112	chr6_31974055_31974055_A/G
112	chr6_31974056_31974056_G/A
112	chr6_31974064_31974064_T/G
112	chr6_31974069_31974069_A/G
112	chr6_31974076_31974076_A/C
112	chr6_31974095_31974095_G/A
112	chr6_31974099_31974099_T/G
112	chr6_31974104_31974104_G/C
112	chr6_31974105_31974105_G/A
112	chr6_31974130_31974130_G/C
112	chr6_31974158_31974158_A/G
112	chr6_31974177_31974177_G/C
112	chr6_31974181_31974180_-/GAGACTAC
112	chr6_31974184_31974184_T/C
112	chr6_31974467_31974467_A/T
112	chr6_31974572_31974572_A/C
112	chr6_31974579_31974579_C/T
112	chr6_31974589_31974589_G/C
112	chr6_31974843_31974843_C/T
112	chr6_31974848_31974848_A/T
112	chr6_31974851_31974851_A/T
112	chr6_31974857_31974857_A/T
112	chr6_31974888_31974888_G/A
112	chr6_31974889_31974889_T/C
112	chr6_31975054_31975054_G/C
22	chr6_32008070_32008071_CT/-
22	chr6_32008198_32008198_C/T
22	chr6_32008312_32008312_C/T
22	chr6_32008574_32008574_G/A
22	chr6_32008896_32008896_G/A
22	chr6_32008904_32008904_G/A
22	chr6_32009279_32009279_T/C
22	chr6_32009301_32009301_A/G
22	chr6_32009351_32009351_C/T
22	chr6_32009354_32009354_T/C
22	chr6_32009375_32009375_T/C
22	chr6_32009385_32009385_C/T
22	chr6_32009456_32009456_A/G
22	chr6_32010189_32010189_A/C
22	chr6_32010192_32010191_-/T
22	chr6_32010262_32010262_G/C
22	chr6_32010286_32010286_G/C
22	chr6_32011489_32011489_G/A
22	chr6_32011639_32011639_T/C
22	chr6_32011644_32011644_A/G
22	chr6_32011678_32011678_A/G
22	chr6_32011714_32011714_A/G
22	chr6_32011954_32011954_T/C
22	chr6_32011961_32011961_A/G
22	chr6_32012854_32012854_G/C
22	chr6_32012928_32012928_G/A
38	chr6_31975337_31975336_-/CT
38	chr6_31975463_31975463_T/C
38	chr6_31975577_31975577_T/C
38	chr6_31975839_31975839_A/G
38	chr6_31976161_31976161_A/G
38	chr6_31976169_31976169_A/G
38	chr6_31976544_31976544_C/T
38	chr6_31976566_31976566_G/A
38	chr6_31976616_31976616_T/C
38	chr6_31976619_31976619_C/T
38	chr6_31976640_31976640_C/T
38	chr6_31976650_31976650_T/C
38	chr6_31976721_31976721_G/A
38	chr6_31977454_31977454_C/A
38	chr6_31977458_31977458_T/-
38	chr6_31977528_31977528_C/G
38	chr6_31977552_31977552_C/G
38	chr6_31978755_31978755_A/G
38	chr6_31978785_31978785_C/T
38	chr6_31978790_31978790_G/A
38	chr6_31978824_31978824_G/A
38	chr6_31978860_31978860_G/A
38	chr6_31979100_31979100_C/T
38	chr6_31979107_31979107_G/A
38	chr6_31980000_31980000_C/G
38	chr6_31980074_31980074_A/G
29	chr6_32006074_32006074_C/T
29	chr6_32006087_32006087_G/A
29	chr6_32006090_32006090_T/C
29	chr6_32006097_32006097_A/G
29	chr6_32006196_32006196_C/T
29	chr6_32006291_32006291_C/T
29	chr6_32006621_32006621_A/C
29	chr6_32006633_32006632_-/TTG
29	chr6_32006634_32006634_A/T
29	chr6_32006644_32006644_T/G
29	chr6_32006655_32006655_C/T
29	chr6_32006672_32006672_A/G
29	chr6_32006680_32006680_A/G
29	chr6_32006688_32006688_A/G
29	chr6_32006704_32006704_A/G
29	chr6_32006715_32006715_T/G
29	chr6_32006726_32006726_T/C
29	chr6_32006731_32006731_C/G
29	chr6_32006732_32006732_A/C
29	chr6_32006734_32006734_C/T
29	chr6_32006738_32006738_A/C
29	chr6_32006740_32006739_-/ATCC
29	chr6_32006748_32006748_C/A
29	chr6_32006761_32006761_G/-
29	chr6_32006775_32006775_G/T
29	chr6_32006776_32006776_G/C
29	chr6_32006777_32006777_T/A
29	chr6_32006780_32006780_G/A
29	chr6_32006783_32006783_G/A
29	chr6_32006784_32006784_A/G
29	chr6_32006792_32006792_G/T
29	chr6_32006797_32006797_G/A
29	chr6_32006804_32006804_C/A
29	chr6_32006823_32006823_A/G
29	chr6_32006827_32006827_G/T
29	chr6_32006832_32006832_C/G
29	chr6_32006833_32006833_A/G
29	chr6_32006858_32006858_C/G
29	chr6_32006886_32006886_G/A
29	chr6_32006905_32006905_C/G
29	chr6_32006910_32006917_GAGACTAC/-
29	chr6_32006920_32006920_C/T
29	chr6_32007203_32007203_T/A
29	chr6_32007308_32007308_C/A
29	chr6_32007315_32007315_T/C
29	chr6_32007325_32007325_C/G
29	chr6_32007579_32007579_T/C
29	chr6_32007584_32007584_T/A
29	chr6_32007587_32007587_T/A
29	chr6_32007593_32007593_T/A
29	chr6_32007624_32007624_A/G
29	chr6_32007625_32007625_C/T
29	chr6_32007790_32007790_C/G
1876	chr19_55314473_55314476_AGAG/-
1876	chr19_55314801_55314800_-/A
1876	chr19_55314805_55314805_T/G
1876	chr19_55315326_55315326_A/C
1876	chr19_55315440_55315440_A/G
1876	chr19_55315616_55315616_C/T
1876	chr19_55315997_55315997_C/G
1876	chr19_55316329_55316329_A/G
1876	chr19_55316820_55316820_T/C
1876	chr19_55317133_55317133_A/T
1876	chr19_55318200_55318200_T/C
1876	chr19_55318271_55318271_T/C
736	chr7_5962547_5962547_G/A
736	chr7_5962578_5962578_G/A
736	chr7_5962606_5962606_A/G
736	chr7_5963439_5963439_G/A
736	chr7_5963839_5963839_A/-
736	chr7_5964054_5964054_T/-
290	chr1_1416224_1416225_CT/-
167	chr7_5944229_5944229_C/T
167	chr7_5944289_5944289_C/T
167	chr7_5944290_5944290_A/G
167	chr7_5944406_5944406_G/A
167	chr7_5944517_5944517_T/-
167	chr7_5944545_5944550_ACTGAG/-
167	chr7_5944560_5944560_G/A
167	chr7_5944569_5944569_T/C
167	chr7_5944600_5944600_C/T
167	chr7_5944718_5944718_C/-
167	chr7_5945116_5945116_T/C
167	chr7_5945180_5945180_T/C
167	chr7_5945181_5945181_G/A
167	chr7_5945186_5945186_G/A
167	chr7_5945264_5945264_G/T
167	chr7_5945425_5945441_AAAAAAAAAAAAAAGAG/-
167	chr7_5945443_5945443_A/G
167	chr7_5945463_5945463_G/A
167	chr7_5945491_5945494_TTTT/-
167	chr7_5945512_5945511_-/TAAATGT
167	chr7_5945549_5945549_C/T
167	chr7_5945553_5945553_C/T
167	chr7_5945554_5945553_-/TTCTTATAGAGATGGGG
167	chr7_5945556_5945556_A/T
24	chr15_43895244_43895244_C/A
24	chr15_43895263_43895263_C/G
24	chr15_43895291_43895291_C/T
24	chr15_43895293_43895293_T/C
24	chr15_43895300_43895300_C/T
24	chr15_43895330_43895330_C/T
24	chr15_43895336_43895336_C/T
24	chr15_43895337_43895337_T/C
24	chr15_43895366_43895366_C/T
24	chr15_43895375_43895375_T/C
24	chr15_43895395_43895395_A/C
24	chr15_43895397_43895397_T/C
24	chr15_43895417_43895417_C/T
24	chr15_43895431_43895431_A/G
24	chr15_43895437_43895437_A/G
24	chr15_43895441_43895441_T/C
24	chr15_43895442_43895442_G/A
24	chr15_43895467_43895467_C/T
24	chr15_43895468_43895468_A/G
24	chr15_43895505_43895505_A/G
24	chr15_43895520_43895520_C/T
24	chr15_43895542_43895542_T/A
24	chr15_43895560_43895560_C/G
24	chr15_43895638_43895647_CAGCGCAGTA/-
24	chr15_43895731_43895731_A/G
24	chr15_43895733_43895733_A/G
24	chr15_43895746_43895746_A/G
24	chr15_43895747_43895747_G/T
24	chr15_43895751_43895751_T/G
24	chr15_43895767_43895767_G/A
24	chr15_43895770_43895770_A/T
24	chr15_43895771_43895771_T/G
24	chr15_43895775_43895775_A/T
24	chr15_43895803_43895803_A/T
24	chr15_43895805_43895804_-/CCTCA
23	chr15_43896001_43896001_A/G
23	chr15_43896021_43896021_A/C
23	chr15_43896031_43896031_A/G
23	chr15_43896035_43896035_C/T
23	chr15_43896042_43896042_C/T
23	chr15_43896051_43896051_C/G
23	chr15_43896053_43896053_A/C
23	chr15_43896057_43896057_G/A
23	chr15_43896114_43896114_G/A
23	chr15_43896118_43896118_G/A
23	chr15_43896265_43896265_T/C
23	chr15_43896414_43896414_C/A
23	chr15_43896440_43896440_T/C
23	chr15_43896446_43896446_C/A
23	chr15_43896482_43896482_T/G
23	chr15_43896750_43896750_G/A
23	chr15_43896754_43896754_A/C
23	chr15_43896760_43896760_A/G
23	chr15_43896840_43896840_G/A
23	chr15_43896918_43896918_G/A
23	chr15_43897125_43897125_A/G
23	chr15_43897149_43897149_G/A
23	chr15_43897187_43897187_C/T
23	chr15_43897201_43897201_C/A
26	chr15_43897320_43897321_AG/-
26	chr15_43897345_43897345_T/C
26	chr15_43897383_43897383_G/A
26	chr15_43897597_43897597_C/T
26	chr15_43897604_43897604_C/T
26	chr15_43897621_43897621_C/T
26	chr15_43897623_43897623_G/T
26	chr15_43897624_43897624_G/C
26	chr15_43897630_43897630_G/A
26	chr15_43897663_43897663_A/G
26	chr15_43897677_43897677_G/C
26	chr15_43897729_43897729_T/C
36	chr15_43900188_43900188_T/A
36	chr15_43900267_43900267_C/T
39	chr15_43901397_43901397_C/T
39	chr15_43901476_43901476_C/T
39	chr15_43901491_43901491_A/C
169	chr7_141762128_141762128_C/T
169	chr7_141762131_141762131_G/A
169	chr7_141762136_141762136_G/T
169	chr7_141762170_141762170_T/C
169	chr7_141762223_141762223_G/T
169	chr7_141762257_141762257_T/C
169	chr7_141762288_141762288_T/C
169	chr7_141762534_141762534_G/A
169	chr7_141762536_141762536_T/A
169	chr7_141762559_141762559_A/C
169	chr7_141762562_141762562_A/G
169	chr7_141762582_141762582_A/G
169	chr7_141762606_141762606_A/G
169	chr7_141762623_141762623_G/T
169	chr7_141762634_141762634_T/C
169	chr7_141762653_141762653_T/A
169	chr7_141762660_141762660_G/A
169	chr7_141762690_141762690_G/A
169	chr7_141762691_141762691_C/T
169	chr7_141762693_141762693_C/A
169	chr7_141762699_141762699_G/A
169	chr7_141762708_141762708_G/C
169	chr7_141762715_141762715_G/A
169	chr7_141762716_141762715_-/TT
169	chr7_141762716_141762716_G/A
169	chr7_141762720_141762720_C/T
169	chr7_141762724_141762724_C/A
169	chr7_141762725_141762725_G/A
169	chr7_141762727_141762735_GGTGGTTCA/-
169	chr7_141762736_141762736_C/T
169	chr7_141762737_141762737_G/T
169	chr7_141762739_141762739_C/T
169	chr7_141762742_141762742_T/G
169	chr7_141762745_141762745_T/C
169	chr7_141762748_141762748_C/T
169	chr7_141762749_141762749_A/C
169	chr7_141762750_141762750_G/A
172	chr7_141766575_141766575_G/A
172	chr7_141766580_141766580_A/G
172	chr7_141766581_141766581_G/A
172	chr7_141766588_141766595_ATATACAC/-
172	chr7_141766598_141766598_C/T
172	chr7_141766599_141766599_G/T
172	chr7_141766621_141766621_G/T
172	chr7_141766645_141766645_A/G
172	chr7_141766646_141766646_C/T
172	chr7_141766647_141766647_A/G
172	chr7_141766650_141766650_A/G
172	chr7_141766652_141766652_G/C
172	chr7_141766653_141766653_T/C
172	chr7_141766658_141766658_C/T
172	chr7_141766660_141766660_G/T
172	chr7_141766667_141766667_G/C
172	chr7_141766682_141766682_T/C
172	chr7_141766690_141766690_A/G
172	chr7_141766693_141766693_G/T
172	chr7_141766700_141766699_-/T
172	chr7_141766704_141766704_A/T
172	chr7_141766711_141766711_G/T
172	chr7_141766716_141766716_T/G
172	chr7_141766726_141766726_C/G
172	chr7_141766727_141766727_G/C
172	chr7_141766732_141766732_T/C
172	chr7_141766748_141766748_C/T
172	chr7_141766760_141766760_G/A
172	chr7_141766765_141766765_A/T
172	chr7_141766777_141766777_T/C
172	chr7_141766788_141766787_-/CTAT
172	chr7_141766796_141766796_A/T
172	chr7_141766808_141766808_T/G
172	chr7_141766817_141766817_G/T
172	chr7_141766819_141766819_C/G
172	chr7_141766824_141766824_G/A
172	chr7_141766830_141766830_A/G
172	chr7_141766831_141766831_A/G
172	chr7_141766845_141766845_C/G
172	chr7_141766852_141766852_A/T
172	chr7_141766861_141766861_C/A
172	chr7_141766862_141766862_G/A
172	chr7_141766874_141766874_C/T
172	chr7_141766875_141766875_A/G
172	chr7_141766881_141766881_A/G
172	chr7_141766884_141766884_A/G
172	chr7_141766886_141766886_G/T
172	chr7_141766897_141766897_A/G
172	chr7_141766905_141766905_A/G
172	chr7_141766908_141766908_T/C
172	chr7_141766910_141766909_-/G
172	chr7_141766920_141766920_G/A
172	chr7_141766928_141766928_C/T
172	chr7_141767018_141767018_C/A
172	chr7_141767021_141767021_A/G
172	chr7_141767225_141767225_C/T
172	chr7_141767318_141767318_G/A
172	chr7_141767394_141767394_A/-
172	chr7_141767438_141767438_G/A
172	chr7_141767469_141767469_A/T
172	chr7_141767473_141767473_G/T
172	chr7_141767488_141767488_A/G
172	chr7_141767510_141767510_T/G
172	chr7_141767511_141767511_T/G
172	chr7_141767520_141767520_G/A
172	chr7_141767544_141767544_A/G
172	chr7_141767549_141767549_T/C
172	chr7_141767590_141767590_G/T
172	chr7_141767591_141767591_A/G
172	chr7_141767643_141767643_A/G
172	chr7_141767685_141767685_G/A
25	chr6_31991086_31991085_-/A
25	chr6_31994912_31994912_G/A
25	chr6_31995139_31995139_A/G
25	chr6_31996297_31996297_G/A
25	chr6_31996598_31996598_T/C
25	chr6_31996601_31996601_C/G
25	chr6_31996609_31996609_A/T
25	chr6_31996612_31996612_C/G
25	chr6_31996614_31996614_T/C
25	chr6_31996966_31996966_G/A
25	chr6_31997054_31997054_C/G
25	chr6_31997059_31997059_C/T
25	chr6_31997068_31997068_G/T
25	chr6_31997069_31997069_G/C
25	chr6_31997129_31997129_G/C
25	chr6_31997133_31997132_-/C
25	chr6_31997522_31997522_G/T
25	chr6_31997979_31997979_C/T
25	chr6_31998120_31998120_G/A
771	chr11_89771251_89771251_T/-
771	chr11_89771323_89771323_G/C
771	chr11_89771713_89771713_A/T
771	chr11_89771726_89771726_T/C
771	chr11_89772091_89772091_G/C
771	chr11_89772096_89772095_-/T
771	chr11_89772112_89772112_C/G
771	chr11_89772166_89772166_C/A
771	chr11_89772378_89772378_T/C
771	chr11_89772440_89772440_G/T
771	chr11_89772505_89772505_C/T
771	chr11_89772572_89772571_-/TGA
258	chr1_196799146_196799145_-/TTTTGTTTTCAGTTTATTTTCAGAGTGGGTAATTTATATTGCTGTATGTTCAAGT
258	chr1_196799215_196799215_A/G
258	chr1_196799243_196799243_C/T
258	chr1_196799252_196799307_TAAGAACCATCATCAATTTCAAAACCCGTGTCCTCTTAGTGTTACTCCAAAGAATG/-
258	chr1_196799309_196799309_T/C
258	chr1_196799330_196799330_T/C
258	chr1_196799376_196799376_T/C
258	chr1_196799391_196799391_A/G
258	chr1_196799433_196799433_C/T
258	chr1_196799441_196799441_A/C
258	chr1_196799481_196799481_A/G
258	chr1_196799511_196799511_T/C
258	chr1_196799544_196799544_A/C
258	chr1_196799558_196799558_T/C
258	chr1_196799559_196799559_A/G
258	chr1_196799600_196799600_T/C
258	chr1_196799637_196799637_G/A
258	chr1_196799848_196799848_A/T
258	chr1_196799849_196799849_G/C
258	chr1_196799869_196799869_T/C
258	chr1_196799870_196799870_G/A
258	chr1_196799876_196799876_G/T
258	chr1_196799888_196799888_A/C
258	chr1_196799923_196799923_C/T
258	chr1_196799935_196799935_A/T
258	chr1_196799942_196799942_T/G
258	chr1_196799944_196799944_T/C
258	chr1_196799964_196799963_-/T
258	chr1_196799985_196799985_T/C
258	chr1_196800023_196800023_C/T
258	chr1_196800056_196800055_-/G
258	chr1_196800073_196800073_T/C
258	chr1_196800103_196800103_G/A
258	chr1_196800198_196800198_C/G
258	chr1_196800240_196800240_C/T
258	chr1_196800245_196800245_G/A
258	chr1_196800319_196800319_A/C
258	chr1_196800330_196800330_T/C
1842	chr1_22338347_22338346_-/GCAGATCACAAGGTCAGGAGATTGAG
1842	chr1_22338363_22338363_C/A
1842	chr1_22338371_22338371_T/C
1842	chr1_22338374_22338374_C/T
1842	chr1_22338375_22338375_A/G
1842	chr1_22338379_22338379_G/C
1842	chr1_22338451_22338451_A/C
1842	chr1_22338475_22338475_A/G
1842	chr1_22338487_22338487_A/G
1842	chr1_22338493_22338493_T/C
1842	chr1_22338500_22338500_C/T
1842	chr1_22338502_22338501_-/TGCCAC
1842	chr1_22338545_22338545_A/G
1842	chr1_22338547_22338549_ACC/-
1842	chr1_22338558_22338558_A/T
1842	chr1_22338559_22338559_A/C
1842	chr1_22338560_22338560_A/C
1842	chr1_22338570_22338570_G/T
1842	chr1_22338585_22338585_T/C
1842	chr1_22338591_22338591_C/T
1842	chr1_22338594_22338617_ACATACGTATATATATATACACAA/-
1842	chr1_22338617_22338617_T/C
1842	chr1_22338619_22338619_C/T
1842	chr1_22338626_22338626_G/A
1842	chr1_22338641_22338641_A/C
1842	chr1_22338643_22338643_T/G
1842	chr1_22338680_22338680_G/A
1842	chr1_22338681_22338681_C/T
1842	chr1_22338686_22338686_A/G
1842	chr1_22338687_22338687_C/T
1842	chr1_22338696_22338696_A/C
1842	chr1_22338699_22338699_C/T
1842	chr1_22338700_22338700_A/G
1842	chr1_22338701_22338701_T/C
1842	chr1_22338720_22338720_T/C
1842	chr1_22338721_22338721_G/A
1842	chr1_22338728_22338728_G/C
1842	chr1_22338736_22338736_A/G
1842	chr1_22338788_22338787_-/TATCAT
1842	chr1_22338834_22338834_C/T
1842	chr1_22339353_22339353_C/A
1842	chr1_22339382_22339382_T/C
1842	chr1_22339384_22339384_G/C
1842	chr1_22339387_22339387_G/C
1842	chr1_22339421_22339421_T/A
1842	chr1_22339453_22339452_-/T
1842	chr1_22339458_22339458_G/A
1842	chr1_22339460_22339460_C/T
1842	chr1_22339490_22339490_G/A
1842	chr1_22339537_22339537_G/A
1842	chr1_22339614_22339613_-/AAG
146	chr22_39387045_39387047_ATA/-
146	chr22_39387080_39387080_T/G
146	chr22_39387228_39387228_C/T
146	chr22_39387531_39387531_C/T
146	chr22_39387579_39387579_G/A
146	chr22_39387792_39387792_A/G
146	chr22_39387800_39387800_G/A
146	chr22_39387806_39387805_-/GCAGGGAGA
146	chr22_39387836_39387836_A/C
146	chr22_39387841_39387841_C/T
146	chr22_39387849_39387849_A/T
146	chr22_39387886_39387886_G/C
146	chr22_39387888_39387888_A/G
795	chr10_48028650_48028653_TAAA/-
795	chr10_48029011_48029011_A/C
795	chr10_48029206_48029206_C/T
795	chr10_48029324_48029324_A/C
202	chr9_84562537_84562536_-/A
230	chr19_52148916_52148920_TTCCC/-
230	chr19_52148921_52148921_T/A
230	chr19_52148922_52148922_G/A
230	chr19_52148928_52148928_C/T
230	chr19_52148929_52148929_A/G
230	chr19_52148932_52148932_C/T
230	chr19_52148934_52148934_C/G
230	chr19_52148944_52148944_C/G
230	chr19_52148948_52148948_C/T
230	chr19_52148949_52148949_T/C
230	chr19_52148950_52148950_T/C
230	chr19_52148951_52148951_C/T
230	chr19_52148953_52148952_-/ACAC
230	chr19_52148981_52148981_C/A
230	chr19_52149004_52149004_G/A
230	chr19_52149092_52149092_C/T
230	chr19_52149494_52149494_A/G
230	chr19_52149499_52149499_T/C
230	chr19_52150192_52150192_T/G
230	chr19_52150223_52150223_C/G
230	chr19_52150235_52150235_A/C
230	chr19_52150236_52150236_T/A
230	chr19_52150261_52150260_-/CGATGT
230	chr19_52150262_52150262_G/A
230	chr19_52150272_52150280_AGACTTGTA/-
230	chr19_52150283_52150283_T/C
230	chr19_52150284_52150284_C/T
230	chr19_52150285_52150285_T/G
230	chr19_52150288_52150288_A/G
230	chr19_52150289_52150289_C/A
230	chr19_52150292_52150292_C/T
230	chr19_52150293_52150293_T/G
230	chr19_52150299_52150299_C/G
230	chr19_52150301_52150301_C/T
230	chr19_52150304_52150304_G/C
230	chr19_52150305_52150305_G/C
230	chr19_52150306_52150306_T/C
230	chr19_52150308_52150308_C/T
230	chr19_52150311_52150311_T/A
230	chr19_52150313_52150312_-/TGAT
230	chr19_52150314_52150314_C/T
230	chr19_52150316_52150316_G/T
230	chr19_52150320_52150320_C/T
230	chr19_52150321_52150321_A/C
230	chr19_52150322_52150322_C/A
230	chr19_52150324_52150323_-/GAGTGAG
230	chr19_52150324_52150324_T/A
230	chr19_52150329_52150329_T/C
230	chr19_52150331_52150331_T/G
230	chr19_52150333_52150333_C/G
230	chr19_52150334_52150334_A/G
230	chr19_52150335_52150335_C/G
230	chr19_52150338_52150338_T/G
230	chr19_52150339_52150339_T/A
230	chr19_52150340_52150340_G/A
230	chr19_52150342_52150342_C/G
230	chr19_52150348_52150348_T/C
931	chr16_28400917_28400922_TGCAAG/-
931	chr16_28403186_28403186_T/C
931	chr16_28403353_28403355_TCC/-
931	chr16_28403706_28403706_T/C
78	chr8_7685680_7685679_-/G
78	chr8_7685721_7685721_G/A
78	chr8_7686200_7686200_T/C
78	chr8_7686263_7686263_T/C
78	chr8_7686678_7686678_T/C
78	chr8_7686683_7686683_T/C
78	chr8_7686701_7686701_T/A
78	chr8_7686914_7686913_-/T
78	chr8_7687070_7687069_-/TTCCCCCTCCCCCC
84	chr7_6853882_6853881_-/CACTCCTCTTAAAAACATGC
84	chr7_6853896_6853896_A/G
84	chr7_6853917_6853917_T/C
84	chr7_6854036_6854036_G/A
84	chr7_6854040_6854040_G/A
84	chr7_6854059_6854059_A/T
84	chr7_6854105_6854105_T/C
84	chr7_6854266_6854266_T/C
84	chr7_6854272_6854272_A/T
84	chr7_6854277_6854277_C/G
84	chr7_6854312_6854312_A/G
84	chr7_6854372_6854372_T/C
84	chr7_6854416_6854416_G/A
84	chr7_6854511_6854511_C/G
84	chr7_6854616_6854616_T/C
84	chr7_6854651_6854651_C/G
84	chr7_6854771_6854771_G/A
84	chr7_6854803_6854803_C/T
84	chr7_6854804_6854804_T/C
84	chr7_6855019_6855019_C/G
102	chr7_6858738_6858738_A/T
102	chr7_6858740_6858756_CCCCATCTCTATAAGAA/-
102	chr7_6858758_6858758_A/G
102	chr7_6858762_6858762_A/G
102	chr7_6858799_6858805_ACATTTA/-
102	chr7_6858825_6858824_-/AAAA
102	chr7_6858851_6858851_T/C
102	chr7_6858871_6858871_C/T
102	chr7_6858874_6858873_-/CTCTTTTTTTTTTTTTT
102	chr7_6859033_6859033_A/C
102	chr7_6859111_6859111_T/C
102	chr7_6859116_6859116_T/C
102	chr7_6859117_6859117_G/A
102	chr7_6859181_6859181_G/A
102	chr7_6859580_6859579_-/G
102	chr7_6859696_6859696_A/G
102	chr7_6859727_6859727_G/A
102	chr7_6859736_6859736_T/C
102	chr7_6859747_6859746_-/CTCAGT
102	chr7_6859774_6859773_-/A
102	chr7_6859883_6859883_T/C
102	chr7_6859999_6859999_C/T
102	chr7_6860000_6860000_A/G
102	chr7_6860060_6860060_A/G
346	/___
469	chr3_75790110_75790109_-/A
469	chr3_75790444_75790444_G/A
469	chr3_75790513_75790513_T/C
469	chr3_75790822_75790822_A/G
469	chr3_75791063_75791063_T/A
469	chr3_75791490_75791490_A/G
469	chr3_75791554_75791553_-/A
194	chr16_21764268_21764268_A/G
194	chr16_21764603_21764602_-/T
38	chr1_39980431_39980430_-/G
38	chr1_39980486_39980486_G/A
38	chr1_39980600_39980600_T/C
38	chr1_39980740_39980740_C/T
38	chr1_39981364_39981364_G/A
38	chr1_39981365_39981365_G/A
38	chr1_39981367_39981366_-/AGATCGTGGAGGTGGGGGC
38	chr1_39981367_39981367_C/T
38	chr1_39981408_39981408_G/A
38	chr1_39981462_39981462_G/T
38	chr1_39982046_39982046_A/G
38	chr1_39982047_39982047_G/A
38	chr1_39982155_39982155_T/C
38	chr1_39982205_39982205_A/G
19	chr16_70888654_70888654_G/A
19	chr16_70888916_70888916_G/C
19	chr16_70889147_70889147_A/G
12	chr22_39357103_39357102_-/ATA
12	chr22_39357135_39357135_G/T
12	chr22_39357283_39357283_T/C
12	chr22_39357586_39357586_T/C
12	chr22_39357634_39357634_A/G
12	chr22_39357847_39357847_G/A
12	chr22_39357855_39357855_A/G
12	chr22_39357862_39357870_GCAGGGAGA/-
12	chr22_39357900_39357900_C/A
12	chr22_39357905_39357905_T/C
12	chr22_39357913_39357913_T/A
12	chr22_39357950_39357950_C/G
12	chr22_39357952_39357952_G/A
228	chr1_196883504_196883504_A/T
228	chr1_196883505_196883505_T/C
228	chr1_196883506_196883506_A/T
228	chr1_196883507_196883507_G/A
228	chr1_196883508_196883508_T/C
228	chr1_196883509_196883509_A/T
228	chr1_196883510_196883510_C/T
228	chr1_196883512_196883512_C/A
228	chr1_196883515_196883515_T/A
228	chr1_196883516_196883516_T/C
228	chr1_196883518_196883518_A/T
228	chr1_196883519_196883519_T/G
228	chr1_196883521_196883520_-/GAAATAA
228	chr1_196883522_196883522_G/A
228	chr1_196883523_196883523_C/G
228	chr1_196883527_196883527_C/G
228	chr1_196883528_196883528_A/G
228	chr1_196883529_196883529_C/A
228	chr1_196883532_196883532_A/C
228	chr1_196883535_196883535_G/C
228	chr1_196883536_196883536_G/A
228	chr1_196883545_196883553_ATCCCTACA/-
228	chr1_196883556_196883556_G/A
228	chr1_196883558_196883558_G/A
228	chr1_196883562_196883561_-/TATATCCAATTAATATAA
228	chr1_196883564_196883564_C/T
228	chr1_196883568_196883568_G/T
228	chr1_196883569_196883569_T/C
228	chr1_196883571_196883571_G/A
228	chr1_196883573_196883573_G/T
228	chr1_196883574_196883574_T/A
228	chr1_196883576_196883576_G/A
228	chr1_196883578_196883578_G/A
228	chr1_196883581_196883581_T/C
228	chr1_196883583_196883583_G/C
228	chr1_196883585_196883585_A/T
228	chr1_196883586_196883586_T/A
228	chr1_196883587_196883587_G/C
228	chr1_196883588_196883588_G/T
228	chr1_196883589_196883589_C/G
228	chr1_196883590_196883590_A/T
228	chr1_196883594_196883594_A/T
228	chr1_196883598_196883598_G/T
228	chr1_196883600_196883600_A/G
228	chr1_196883601_196883601_A/T
228	chr1_196883603_196883603_C/A
228	chr1_196883605_196883605_T/A
228	chr1_196883606_196883606_C/T
228	chr1_196883609_196883609_T/C
228	chr1_196883611_196883611_T/A
228	chr1_196883612_196883612_T/C
228	chr1_196883615_196883625_TTTGTTTCAGA/-
228	chr1_196883627_196883627_T/A
228	chr1_196883628_196883628_T/A
228	chr1_196883630_196883630_T/G
228	chr1_196883633_196883633_G/T
228	chr1_196883635_196883635_T/C
228	chr1_196883638_196883640_GCC/-
228	chr1_196883642_196883642_G/A
228	chr1_196883643_196883643_T/A
228	chr1_196883644_196883644_T/C
228	chr1_196883648_196883648_G/T
228	chr1_196883650_196883650_G/A
228	chr1_196883652_196883652_A/T
228	chr1_196883654_196883654_T/C
228	chr1_196883655_196883655_C/A
228	chr1_196883658_196883658_G/A
228	chr1_196883660_196883660_G/T
228	chr1_196883661_196883661_C/T
228	chr1_196883662_196883662_C/T
228	chr1_196883665_196883665_G/A
228	chr1_196883667_196883676_GTAATGGCAT/-
228	chr1_196883691_196883691_A/G
228	chr1_196883778_196883778_G/A
228	chr1_196883846_196883845_-/AATA
228	chr1_196883941_196883942_AA/-
228	chr1_196883948_196883948_A/G
228	chr1_196884193_196884193_T/C
228	chr1_196884546_196884546_T/C
228	chr1_196884549_196884549_C/T
228	chr1_196884593_196884593_T/C
228	chr1_196884596_196884596_C/A
228	chr1_196884649_196884649_T/C
228	chr1_196884682_196884682_C/T
228	chr1_196884712_196884712_C/T
228	chr1_196884757_196884757_T/C
228	chr1_196884760_196884760_G/A
228	chr1_196884782_196884782_A/T
228	chr1_196884790_196884789_-/TAAATAAATAAATAAATAAAT
59	chr22_42950427_42950430_ATGT/-
59	chr22_42950484_42950484_G/C
59	chr22_42950502_42950502_A/G
59	chr22_42950531_42950531_G/T
59	chr22_42950585_42950584_-/TG
59	chr22_42950745_42950745_A/G
59	chr22_42950866_42950866_C/G
59	chr22_42951979_42951980_CC/-
59	chr22_42952207_42952207_C/T
59	chr22_42952485_42952485_C/A
59	chr22_42952486_42952486_C/T
59	chr22_42952751_42952751_G/C
59	chr22_42952752_42952752_G/C
43	chr14_74009245_74009251_ACTACAG/-
43	chr14_74009254_74009254_G/A
43	chr14_74009256_74009256_A/G
43	chr14_74009264_74009264_T/A
43	chr14_74009270_74009270_T/C
43	chr14_74009279_74009279_T/C
43	chr14_74009299_74009301_AGG/-
43	chr14_74009301_74009301_C/T
43	chr14_74009312_74009312_A/G
43	chr14_74009321_74009321_G/A
43	chr14_74009325_74009325_G/A
43	chr14_74009330_74009330_G/A
43	chr14_74009402_74009402_G/T
43	chr14_74009419_74009419_C/T
43	chr14_74009434_74009434_C/T
43	chr14_74009503_74009503_A/-
43	chr14_74009505_74009505_T/C
43	chr14_74009532_74009531_-/AA
43	chr14_74009617_74009617_C/T
43	chr14_74009623_74009623_C/T
43	chr14_74009650_74009650_C/T
43	chr14_74009687_74009687_G/A
43	chr14_74009718_74009718_G/A
43	chr14_74009719_74009719_C/T
43	chr14_74009890_74009890_G/A
43	chr14_74010447_74010447_C/T
43	chr14_74010449_74010449_C/T
43	chr14_74010450_74010450_A/T
43	chr14_74010452_74010452_A/T
43	chr14_74010454_74010454_C/A
43	chr14_74010456_74010456_T/A
43	chr14_74010457_74010457_C/A
43	chr14_74010458_74010458_T/C
43	chr14_74010467_74010467_C/T
43	chr14_74010744_74010744_C/G
43	chr14_74010746_74010746_T/C
43	chr14_74010762_74010762_C/T
43	chr14_74010763_74010763_A/G
43	chr14_74010769_74010769_C/G
43	chr14_74010776_74010776_T/C
43	chr14_74010803_74010803_C/T
43	chr14_74010813_74010813_A/G
43	chr14_74010816_74010816_G/A
43	chr14_74010832_74010832_A/C
43	chr14_74010855_74010855_G/A
43	chr14_74010867_74010867_G/A
43	chr14_74010868_74010868_C/G
43	chr14_74010869_74010869_A/G
43	chr14_74010870_74010870_T/C
43	chr14_74010871_74010871_G/A
43	chr14_74010881_74010881_C/A
43	chr14_74010890_74010890_C/T
43	chr14_74010891_74010891_A/G
43	chr14_74010901_74010901_C/G
336	chr7_74524067_74524067_T/-
336	chr7_74524935_74524935_C/G
336	chr7_74525384_74525384_C/T
21	chr15_43890862_43890864_GGG/-
21	chr15_43890894_43890900_TTAAAAA/-
21	chr15_43890902_43890902_G/A
21	chr15_43890908_43890908_A/G
21	chr15_43890909_43890909_G/A
21	chr15_43890915_43890915_A/G
21	chr15_43890917_43890917_G/A
21	chr15_43891069_43891069_A/G
21	chr15_43891099_43891099_T/C
21	chr15_43891173_43891173_C/T
21	chr15_43891174_43891174_A/G
21	chr15_43891193_43891193_C/T
21	chr15_43891195_43891195_A/G
21	chr15_43891200_43891200_C/T
21	chr15_43891235_43891235_G/C
21	chr15_43891334_43891333_-/GA
21	chr15_43891350_43891350_C/T
21	chr15_43891352_43891352_T/C
21	chr15_43891504_43891504_C/A
21	chr15_43891558_43891558_C/T
21	chr15_43892272_43892272_T/C
21	chr15_43892634_43892633_-/TC
21	chr15_43892640_43892640_C/A
21	chr15_43892646_43892646_T/G
21	chr15_43892807_43892807_G/A
21	chr15_43892808_43892808_T/G
21	chr15_43892822_43892822_C/A
21	chr15_43892847_43892847_G/C
21	chr15_43892862_43892862_G/C
21	chr15_43892893_43892893_A/G
21	chr15_43892931_43892931_G/A
21	chr15_43892991_43892991_C/T
21	chr15_43892993_43892993_G/T
21	chr15_43892995_43892995_C/A
21	chr15_43893008_43893008_T/C
21	chr15_43893019_43893019_T/C
21	chr15_43893036_43893036_C/G
21	chr15_43893038_43893038_G/A
21	chr15_43893042_43893042_C/G
21	chr15_43893072_43893072_G/A
21	chr15_43893437_43893436_-/A
21	chr15_43893462_43893462_G/A
21	chr15_43893466_43893466_C/T
21	chr15_43893476_43893476_T/C
21	chr15_43893485_43893485_G/T
21	chr15_43893511_43893511_A/-
21	chr15_43893570_43893570_C/G
21	chr15_43893582_43893582_G/T
21	chr15_43893602_43893602_T/A
21	chr15_43893673_43893673_C/T
21	chr15_43893681_43893681_T/C
21	chr15_43893696_43893696_C/T
21	chr15_43893702_43893702_A/G
21	chr15_43893725_43893725_G/C
21	chr15_43893762_43893762_C/G
21	chr15_43893784_43893784_G/C
21	chr15_43893789_43893789_G/A
21	chr15_43893802_43893802_T/G
21	chr15_43893804_43893804_C/A
21	chr15_43893830_43893830_C/A
21	chr15_43893852_43893852_T/C
21	chr15_43893855_43893855_A/G
21	chr15_43893859_43893859_T/C
21	chr15_43893873_43893873_A/G
27	chr15_43903129_43903129_A/G
27	chr15_43903228_43903237_GTGTGTGTGT/-
27	chr15_43903846_43903846_T/C
27	chr15_43905616_43905616_T/C
18	chr7_5982385_5982385_C/T
18	chr7_5982386_5982386_T/A
18	chr7_5982513_5982513_T/A
18	chr7_5982543_5982543_T/A
18	chr7_5982555_5982561_ATATTTT/-
18	chr7_5982644_5982644_A/G
18	chr7_5982687_5982687_T/C
18	chr7_5982762_5982762_G/A
18	chr7_5982839_5982839_T/C
18	chr7_5982862_5982862_T/A
18	chr7_5983158_5983157_-/A
18	chr7_5983195_5983195_C/G
18	chr7_5983389_5983389_C/T
18	chr7_5983526_5983526_C/T
18	chr7_5983553_5983553_A/C
18	chr7_5983675_5983675_T/A
18	chr7_5983850_5983850_G/A
18	chr7_5984043_5984043_A/G
18	chr7_5984111_5984111_C/T
18	chr7_5984112_5984112_A/G
18	chr7_5984446_5984445_-/AAAAAAAAAAA
18	chr7_5984494_5984494_T/C
18	chr7_5984538_5984538_G/A
18	chr7_5985027_5985027_T/C
18	chr7_5985472_5985472_A/-
23	chrX_149098260_149098260_A/G
23	chrX_149098447_149098447_A/G
23	chrX_149098531_149098531_G/A
28	chr16_70937156_70937156_T/C
28	chr16_70937217_70937217_C/T
28	chr16_70937994_70937994_C/G
28	chr16_70938160_70938160_G/A
28	chr16_70938421_70938421_T/G
7	chr15_43927561_43927561_T/G
7	chr15_43927563_43927563_C/A
7	chr15_43927575_43927575_A/G
7	chr15_43927585_43927585_G/C
7	chr15_43927593_43927593_T/C
7	chr15_43927597_43927597_T/C
7	chr15_43927612_43927611_-/T
7	chr15_43927620_43927620_G/A
7	chr15_43927638_43927637_-/AAAAAAAAAGAAAAAAGA
7	chr15_43927681_43927681_A/G
7	chr15_43927734_43927734_A/C
7	chr15_43927756_43927756_A/T
7	chr15_43927851_43927851_G/A
7	chr15_43927854_43927854_A/G
7	chr15_43927857_43927857_T/C
7	chr15_43927920_43927920_C/T
7	chr15_43927924_43927924_C/T
7	chr15_43927951_43927951_G/A
7	chr15_43927973_43927973_C/T
7	chr15_43927977_43927977_G/A
7	chr15_43927978_43927978_C/T
7	chr15_43927992_43927992_T/G
7	chr15_43928014_43928014_A/C
7	chr15_43928021_43928021_G/A
7	chr15_43928023_43928023_A/G
7	chr15_43928027_43928027_G/T
7	chr15_43928429_43928429_G/A
7	chr15_43928430_43928430_A/G
7	chr15_43928444_43928444_A/G
7	chr15_43928477_43928477_C/T
7	chr15_43928483_43928483_T/C
7	chr15_43928490_43928490_T/C
7	chr15_43928552_43928553_CA/-
7	chr15_43928573_43928573_A/T
7	chr15_43928574_43928575_TA/-
7	chr15_43928586_43928586_T/G
7	chr15_43928591_43928591_T/A
7	chr15_43928593_43928593_G/T
7	chr15_43928596_43928596_G/A
7	chr15_43928597_43928597_T/A
7	chr15_43928599_43928599_G/T
7	chr15_43928601_43928600_-/AATTTA
7	chr15_43931718_43931718_T/C
7	chr15_43931743_43931743_G/A
7	chr15_43931873_43931873_T/C
7	chr15_43931875_43931875_T/C
7	chr15_43932100_43932100_C/T
7	chr15_43932171_43932171_A/C
7	chr15_43932392_43932392_G/A
7	chr15_43932640_43932640_A/C
7	chr15_43932701_43932701_A/G
7	chr15_43939055_43939055_A/G
7	chr15_43939058_43939058_G/-
7	chr15_43939060_43939060_G/A
7	chr15_43939064_43939064_T/C
7	chr15_43939069_43939069_A/C
7	chr15_43939074_43939074_G/A
7	chr15_43939101_43939101_G/A
7	chr15_43939134_43939134_C/T
7	chr15_43939135_43939135_C/G
7	chr15_43939148_43939148_C/T
7	chr15_43939149_43939149_C/T
7	chr15_43939158_43939158_A/G
7	chr15_43939160_43939160_A/C
7	chr15_43939161_43939161_C/T
7	chr15_43939165_43939165_C/T
7	chr15_43939176_43939176_A/C
7	chr15_43939203_43939203_G/C
7	chr15_43939206_43939206_T/C
7	chr15_43939210_43939210_C/T
7	chr15_43939235_43939235_G/T
7	chr15_43939248_43939248_C/G
7	chr15_43939263_43939263_A/G
7	chr15_43939266_43939266_T/C
7	chr15_43939284_43939284_C/T
7	chr15_43939336_43939336_T/C
7	chr15_43939337_43939337_G/A
7	chr15_43939402_43939402_A/G
7	chr15_43939412_43939412_G/A
7	chr15_43939419_43939419_A/T
7	chr15_43939424_43939424_G/A
7	chr15_43939595_43939595_C/T
7	chr15_43939612_43939612_A/C
7	chr15_43939613_43939613_A/G
7	chr15_43939615_43939615_G/C
7	chr15_43939640_43939640_T/C
7	chr15_43939642_43939642_C/T
7	chr15_43939680_43939680_A/G
7	chr15_43939688_43939688_A/G
7	chr15_43939743_43939743_G/T
7	chr15_43939748_43939748_G/A
7	chr15_43939757_43939757_T/C
7	chr15_43939767_43939767_C/G
7	chr15_43939777_43939777_A/G
7	chr15_43939916_43939916_C/G
7	chr15_43939917_43939917_A/T
7	chr15_43939926_43939926_T/C
7	chr15_43939976_43939976_T/C
7	chr15_43939978_43939978_C/T
7	chr15_43940033_43940032_-/GGCC
7	chr15_43940126_43940126_C/-
7	chr15_43940137_43940137_C/T
7	chr15_43940141_43940141_G/A
7	chr15_43940173_43940173_A/G
7	chr15_43940237_43940237_T/C
7	chr15_43940354_43940354_A/G
7	chr15_43940405_43940405_A/C
7	chr15_43940424_43940424_G/A
7	chr15_43940435_43940435_G/T
7	chr15_43940457_43940456_-/GA
47	chr16_2626792_2626793_TC/-
47	chr16_2626846_2626846_G/A
47	chr16_2627093_2627093_A/G
47	chr16_2627262_2627262_A/G
47	chr16_2627525_2627525_G/A
47	chr16_2627747_2627747_T/G
47	chr16_2627803_2627803_C/G
47	chr16_2627838_2627838_C/T
8	chr11_18267212_18267215_CTGC/-
8	chr11_18267225_18267225_A/C
8	chr11_18267266_18267266_G/A
8	chr11_18267273_18267273_G/A
8	chr11_18267274_18267274_G/T
8	chr11_18267307_18267307_C/-
8	chr11_18267344_18267344_A/G
8	chr11_18267353_18267353_A/G
8	chr11_18267356_18267356_A/G
8	chr11_18267457_18267457_C/G
8	chr11_18267669_18267669_A/-
8	chr11_18267671_18267671_A/G
8	chr11_18267839_18267839_A/G
8	chr11_18267852_18267852_G/A
27	chr5_833215_833214_-/TGAA
27	chr5_833307_833308_AA/-
27	chr5_833323_833323_C/T
27	chr5_833621_833621_A/G
27	chr5_833624_833624_T/G
27	chr5_833995_833995_G/C
27	chr5_834132_834132_G/A
27	chr5_834176_834176_G/A
27	chr5_834178_834178_G/A
27	chr5_834258_834258_A/G
27	chr5_834279_834279_G/T
27	chr5_834289_834289_A/G
27	chr5_834387_834387_G/A
27	chr5_834396_834396_A/G
27	chr5_834483_834482_-/TTTTGTAGAGAT
10	chr1_22328577_22328585_CTCTGGCCT/-
10	chr1_22328638_22328638_A/G
10	chr1_22328716_22328716_A/T
10	chr1_22328720_22328720_T/C
10	chr1_22328778_22328778_C/T
10	chr1_22328790_22328790_T/C
10	chr1_22328863_22328862_-/T
10	chr1_22328874_22328874_A/T
10	chr1_22328917_22328917_C/T
10	chr1_22329097_22329097_G/A
10	chr1_22329219_22329219_C/T
10	chr1_22329302_22329302_C/G
10	chr1_22329305_22329305_C/T
10	chr1_22329346_22329346_G/A
10	chr1_22329407_22329407_G/C
10	chr1_22329417_22329417_T/C
10	chr1_22329465_22329465_A/C
10	chr1_22329523_22329523_A/G
10	chr1_22329525_22329525_T/C
10	chr1_22329543_22329543_C/A
10	chr1_22329645_22329645_T/C
10	chr1_22329719_22329718_-/CCATCTAC
26	chr8_7396622_7396622_A/-
26	chr8_7398577_7398577_T/C
1	chr16_18542623_18542623_T/C
1	chr16_18542636_18542636_C/T
1	chr16_18542644_18542644_C/T
1	chr16_18542651_18542651_T/C
1	chr16_18542710_18542710_G/C
1	chr16_18542711_18542711_G/A
1	chr16_18542738_18542738_T/C
1	chr16_18542849_18542849_G/A
1	chr16_18543017_18543017_T/C
1	chr16_18543060_18543060_C/T
1	chr16_18543061_18543061_A/G
1	chr16_18543110_18543110_A/G
1	chr16_18543290_18543290_T/C
1	chr16_18543347_18543347_C/G
1	chr16_18543483_18543482_-/ATGT
3	chr1_1669261_1669260_-/ATT
3	chr1_1669344_1669344_G/A
3	chr1_1669386_1669386_G/A
3	chr1_1669402_1669402_A/G
3	chr1_1669427_1669427_G/A
3	chr1_1669524_1669524_G/-
3	chr1_1669566_1669566_C/T
3	chr1_1669740_1669740_T/C
3	chr1_1670432_1670432_T/C
3	chr1_1670544_1670544_G/A
3	chr1_1670570_1670570_T/C
3	chr1_1671132_1671132_T/C
96	chr7_6803025_6803032_GCGCCATT/-
96	chr7_6803088_6803087_-/CAAA
96	chr7_6803279_6803279_A/G
96	chr7_6803304_6803304_G/A
96	chr7_6803523_6803523_G/A
96	chr7_6803826_6803826_G/A
96	chr7_6804011_6804010_-/T
32	chr10_51973937_51973936_-/TAAA
32	chr10_51974294_51974294_C/A
32	chr10_51974489_51974489_T/C
32	chr10_51974607_51974607_C/A
12	chr1_248812947_248812949_CTC/-
12	chr1_248813009_248813009_A/G
12	chr1_248813080_248813079_-/A
12	chr1_248813126_248813126_G/C
12	chr1_248813168_248813168_T/C
12	chr1_248813224_248813224_A/C
12	chr1_248813230_248813230_C/G
12	chr1_248813271_248813271_C/A
12	chr1_248813292_248813292_T/C
12	chr1_248813343_248813343_A/G
12	chr1_248813483_248813483_C/G
12	chr1_248813547_248813547_G/C
12	chr1_248813785_248813785_A/T
12	chr1_248813827_248813827_T/C
12	chr1_248814080_248814080_A/C
12	chr1_248814104_248814105_AG/-
12	chr1_248814203_248814203_A/G
12	chr1_248814216_248814216_C/T
12	chr1_248814266_248814268_AAC/-
12	chr1_248814282_248814284_GTC/-
12	chr1_248814285_248814285_G/A
12	chr1_248814589_248814589_A/-
15	chr1_108771144_108771144_G/A
15	chr1_108771263_108771263_A/G
15	chr1_108771707_108771707_C/T
15	chr1_108771711_108771711_C/A
15	chr1_108771721_108771721_T/C
15	chr1_108772107_108772107_C/A
9	chr1_40235331_40235331_C/T
9	chr1_40235381_40235381_G/A
9	chr1_40235489_40235489_T/C
9	chr1_40235490_40235490_C/T
9	chr1_40236074_40236074_A/C
9	chr1_40236128_40236128_T/C
9	chr1_40236169_40236169_A/G
9	chr1_40236170_40236188_GCCCCCACCTCCACGATCT/-
9	chr1_40236190_40236190_T/C
9	chr1_40236191_40236191_T/C
9	chr1_40236815_40236815_A/G
9	chr1_40236955_40236955_G/A
9	chr1_40237069_40237069_T/C
9	chr1_40237125_40237125_C/-
51	chr1_196758599_196758599_T/A
51	chr1_196758600_196758600_C/T
51	chr1_196758601_196758601_T/A
51	chr1_196758602_196758602_A/G
51	chr1_196758603_196758603_C/T
51	chr1_196758604_196758604_T/A
51	chr1_196758605_196758605_T/C
51	chr1_196758607_196758607_A/C
51	chr1_196758610_196758610_A/T
51	chr1_196758611_196758611_C/T
51	chr1_196758613_196758613_T/A
51	chr1_196758614_196758614_G/T
51	chr1_196758616_196758622_GAAATAA/-
51	chr1_196758624_196758624_A/G
51	chr1_196758625_196758625_G/C
51	chr1_196758629_196758629_G/C
51	chr1_196758630_196758630_G/A
51	chr1_196758631_196758631_A/C
51	chr1_196758634_196758634_C/A
51	chr1_196758637_196758637_C/G
51	chr1_196758638_196758638_A/G
51	chr1_196758646_196758645_-/ATCCCTACA
51	chr1_196758649_196758649_A/G
51	chr1_196758651_196758651_A/G
51	chr1_196758655_196758672_TATATCCAATTAATATAA/-
51	chr1_196758675_196758675_T/C
51	chr1_196758679_196758679_T/G
51	chr1_196758680_196758680_C/T
51	chr1_196758682_196758682_A/G
51	chr1_196758684_196758684_T/G
51	chr1_196758685_196758685_A/T
51	chr1_196758687_196758687_A/G
51	chr1_196758689_196758689_A/G
51	chr1_196758692_196758692_C/T
51	chr1_196758694_196758694_C/G
51	chr1_196758696_196758696_T/A
51	chr1_196758697_196758697_A/T
51	chr1_196758698_196758698_C/G
51	chr1_196758699_196758699_T/G
51	chr1_196758700_196758700_G/C
51	chr1_196758701_196758701_T/A
51	chr1_196758705_196758705_T/A
51	chr1_196758709_196758709_T/G
51	chr1_196758711_196758711_G/A
51	chr1_196758712_196758712_T/A
51	chr1_196758714_196758714_A/C
51	chr1_196758716_196758716_A/T
51	chr1_196758717_196758717_T/C
51	chr1_196758720_196758720_C/T
51	chr1_196758722_196758722_A/T
51	chr1_196758723_196758723_C/T
51	chr1_196758725_196758724_-/TTTGTTTCAGA
51	chr1_196758727_196758727_A/T
51	chr1_196758728_196758728_A/T
51	chr1_196758730_196758730_G/T
51	chr1_196758733_196758733_T/G
51	chr1_196758735_196758735_C/T
51	chr1_196758737_196758736_-/GCC
51	chr1_196758739_196758739_A/G
51	chr1_196758740_196758740_A/T
51	chr1_196758741_196758741_C/T
51	chr1_196758745_196758745_T/G
51	chr1_196758747_196758747_A/G
51	chr1_196758749_196758749_T/A
51	chr1_196758751_196758751_C/T
51	chr1_196758752_196758752_A/C
51	chr1_196758755_196758755_A/G
51	chr1_196758757_196758757_T/G
51	chr1_196758758_196758758_T/C
51	chr1_196758759_196758759_T/C
51	chr1_196758762_196758762_A/G
51	chr1_196758763_196758762_-/GTAATGGCAT
51	chr1_196758778_196758778_G/A
51	chr1_196758865_196758865_A/G
51	chr1_196758933_196758936_AATA/-
51	chr1_196759031_196759030_-/AA
51	chr1_196759037_196759037_G/A
51	chr1_196759282_196759282_C/T
51	chr1_196759635_196759635_C/T
51	chr1_196759638_196759638_T/C
51	chr1_196759682_196759682_C/T
51	chr1_196759685_196759685_A/C
51	chr1_196759738_196759738_C/T
51	chr1_196759771_196759771_T/C
51	chr1_196759801_196759801_T/C
51	chr1_196759846_196759846_C/T
51	chr1_196759849_196759849_A/G
51	chr1_196759871_196759871_T/A
51	chr1_196759879_196759899_TAAATAAATAAATAAATAAAT/-
2	chr19_54723985_54723987_TGG/-
2	chr19_54723995_54723995_G/C
2	chr19_54724407_54724407_C/T
2	chr19_54724411_54724411_C/T
2	chr19_54724430_54724430_T/A
2	chr19_54724431_54724431_G/A
2	chr19_54724606_54724606_C/A
2	chr19_54724608_54724608_G/A
2	chr19_54724609_54724609_C/A
2	chr19_54724611_54724611_A/C
2	chr19_54724614_54724614_A/G
2	chr19_54725019_54725019_G/A
2	chr19_54725040_54725040_A/G
2	chr19_54725042_54725042_T/G
8	chr15_22382400_22382406_TAGTTCA/-
8	chr15_22382414_22382414_T/G
8	chr15_22382415_22382415_A/T
8	chr15_22382422_22382422_A/T
8	chr15_22382425_22382425_T/G
8	chr15_22382428_22382428_C/G
8	chr15_22382431_22382431_C/A
8	chr15_22382433_22382433_G/A
8	chr15_22382434_22382434_A/G
8	chr15_22382435_22382435_A/C
8	chr15_22382439_22382438_-/ACAATT
8	chr15_22382442_22382442_C/T
8	chr15_22382446_22382446_T/C
8	chr15_22382449_22382449_A/C
8	chr15_22382452_22382452_G/A
8	chr15_22382455_22382455_A/G
8	chr15_22382457_22382457_T/A
8	chr15_22382460_22382460_A/G
8	chr15_22382466_22382466_A/C
8	chr15_22382467_22382467_G/A
8	chr15_22382468_22382468_A/G
8	chr15_22382469_22382469_A/G
8	chr15_22382476_22382476_A/G
8	chr15_22382478_22382478_G/A
8	chr15_22382480_22382480_T/G
8	chr15_22382481_22382481_A/C
8	chr15_22382483_22382483_C/A
8	chr15_22382484_22382484_A/G
8	chr15_22382489_22382489_A/G
8	chr15_22382490_22382490_C/A
8	chr15_22382496_22382496_A/G
8	chr15_22382497_22382497_G/A
8	chr15_22382499_22382499_G/A
8	chr15_22382501_22382501_C/G
8	chr15_22382508_22382508_T/C
8	chr15_22382518_22382518_G/C
8	chr15_22382521_22382521_C/T
8	chr15_22382526_22382526_T/C
8	chr15_22382531_22382531_C/T
8	chr15_22382534_22382534_A/G
8	chr15_22382542_22382542_C/T
8	chr15_22382548_22382548_T/C
8	chr15_22382562_22382562_G/A
8	chr15_22382563_22382563_A/G
8	chr15_22382565_22382565_C/T
8	chr15_22382571_22382571_T/A
8	chr15_22382578_22382578_C/T
8	chr15_22382580_22382580_T/C
8	chr15_22382581_22382581_A/T
8	chr15_22382711_22382711_G/A
8	chr15_22382739_22382739_A/G
8	chr15_22382845_22382845_G/A
8	chr15_22382855_22382855_G/T
8	chr15_22382865_22382865_C/G
8	chr15_22382867_22382867_G/A
8	chr15_22382884_22382884_C/T
8	chr15_22382962_22382962_C/A
8	chr15_22383064_22383065_CT/-
27	chr12_11506222_11506222_T/C
27	chr12_11506244_11506244_C/G
27	chr12_11506248_11506247_-/GGTCCTTGTGGCTTTCCTGGAGGTGGGGGACCTTGAGGTTTGTTGCCTCCTTGTGGGGGTGGTCCTTGTGGCTTTCCTGGAGGAGGTGGGGGACCTTGAGGCTGGTTGCCTCCTTGTGGGGGTGGTCCTTGTGGCTTTCCTGGAGGAGATCGAGAACTTCGGGACTTGCTGCCTCCTTGTGGGGGT
27	chr12_11506399_11506399_T/C
27	chr12_11506403_11506403_A/C
27	chr12_11506408_11506408_C/T
27	chr12_11506413_11506412_-/TTG
27	chr12_11506464_11506464_C/T
27	chr12_11506473_11506473_C/G
27	chr12_11506533_11506533_T/C
27	chr12_11506539_11506539_A/G
27	chr12_11506583_11506583_A/G
27	chr12_11506584_11506584_G/A
27	chr12_11506586_11506586_G/A
27	chr12_11506596_11506595_-/TTG
27	chr12_11506654_11506654_C/T
27	chr12_11506704_11506704_G/A
27	chr12_11506713_11506713_G/A
27	chr12_11506722_11506722_A/G
27	chr12_11506749_11506749_T/C
27	chr12_11506785_11506785_C/T
27	chr12_11506890_11506890_G/A
27	chr12_11506893_11506893_C/T
27	chr12_11506896_11506896_G/A
27	chr12_11506899_11506898_-/TGGTTGCCTCCTTGTGGGGGTGGTCCTTGTGGCTTTCCTGGAGGAGATGGGGGACCTTGAGGT
27	chr12_11506919_11506919_A/G
27	chr12_11506922_11506922_G/C
27	chr12_11506943_11506943_G/A
27	chr12_11506979_11506979_C/T
27	chr12_11506989_11506989_A/C
27	chr12_11507018_11507018_C/T
27	chr12_11507044_11507044_T/C
27	chr12_11507056_11507056_G/A
27	chr12_11507057_11507057_A/G
27	chr12_11507060_11507060_A/C
27	chr12_11507074_11507074_A/C
27	chr12_11507081_11507081_T/-
27	chr12_11507113_11507113_A/G
27	chr12_11507114_11507114_A/C
27	chr12_11507117_11507117_T/C
27	chr12_11507118_11507118_G/A
27	chr12_11507149_11507149_G/T
27	chr12_11507184_11507183_-/TG
27	chr12_11507206_11507206_T/C
22	chr12_11507921_11507921_T/-
22	chr12_11508036_11508036_T/C
22	chr12_11508044_11508044_A/G
22	chr12_11508265_11508265_C/T
22	chr12_11508270_11508270_G/T
22	chr12_11508284_11508284_T/C
22	chr12_11508291_11508291_G/A
22	chr12_11508351_11508351_C/T
22	chr12_11508406_11508406_T/C
22	chr12_11508411_11508411_T/C
22	chr12_11508649_11508649_A/T
22	chr12_11508653_11508653_C/T
22	chr12_11508901_11508901_G/A
22	chr12_11508913_11508913_A/G
22	chr12_11508930_11508930_C/G
22	chr12_11508933_11508933_C/A
22	chr12_11508936_11508936_T/A
22	chr7_141791440_141791444_TCACT/-
22	chr7_141791473_141791473_T/C
22	chr7_141791476_141791476_A/G
22	chr7_141791481_141791481_T/G
22	chr7_141791515_141791515_C/T
22	chr7_141791568_141791568_T/G
22	chr7_141791602_141791602_C/T
22	chr7_141791633_141791633_C/T
22	chr7_141791879_141791879_A/G
22	chr7_141791881_141791881_A/T
22	chr7_141791904_141791904_C/A
22	chr7_141791907_141791907_G/A
22	chr7_141791927_141791927_G/A
22	chr7_141791951_141791951_G/A
22	chr7_141791968_141791968_T/G
22	chr7_141791979_141791979_C/T
22	chr7_141791998_141791998_A/T
22	chr7_141792005_141792005_A/G
22	chr7_141792035_141792035_A/G
22	chr7_141792036_141792036_T/C
22	chr7_141792038_141792038_A/C
22	chr7_141792044_141792044_A/G
22	chr7_141792053_141792053_C/G
22	chr7_141792060_141792060_A/G
22	chr7_141792062_141792063_TT/-
22	chr7_141792063_141792063_A/G
22	chr7_141792067_141792067_T/C
22	chr7_141792071_141792071_A/C
22	chr7_141792072_141792072_A/G
22	chr7_141792074_141792073_-/GGTGGTTCA
22	chr7_141792074_141792074_T/C
22	chr7_141792075_141792075_T/G
22	chr7_141792077_141792077_T/C
22	chr7_141792080_141792080_G/T
22	chr7_141792091_141792091_C/T
22	chr7_141792094_141792094_T/C
22	chr7_141792095_141792095_C/A
22	chr7_141792096_141792096_A/G
22	chr7_141795553_141795555_TTA/-
22	chr7_141795567_141795567_A/G
22	chr7_141795572_141795572_G/A
22	chr7_141795573_141795573_A/G
22	chr7_141795580_141795579_-/ATATACAC
22	chr7_141795582_141795582_T/C
22	chr7_141795583_141795583_T/G
22	chr7_141795605_141795605_T/G
22	chr7_141795629_141795629_G/A
22	chr7_141795630_141795630_T/C
22	chr7_141795631_141795631_G/A
22	chr7_141795634_141795634_G/A
22	chr7_141795636_141795636_C/G
22	chr7_141795637_141795637_C/T
22	chr7_141795642_141795642_T/C
22	chr7_141795644_141795644_T/G
22	chr7_141795651_141795651_C/G
22	chr7_141795666_141795666_C/T
22	chr7_141795674_141795674_G/A
22	chr7_141795677_141795677_T/G
22	chr7_141795685_141795685_T/-
22	chr7_141795689_141795689_T/A
22	chr7_141795696_141795696_T/G
22	chr7_141795701_141795701_G/T
22	chr7_141795711_141795711_G/C
22	chr7_141795712_141795712_C/G
22	chr7_141795717_141795717_C/T
22	chr7_141795733_141795733_T/C
22	chr7_141795745_141795745_A/G
22	chr7_141795750_141795750_T/A
22	chr7_141795762_141795762_C/T
22	chr7_141795774_141795777_CTAT/-
22	chr7_141795785_141795785_T/A
22	chr7_141795797_141795797_G/T
22	chr7_141795806_141795806_T/G
22	chr7_141795808_141795808_G/C
22	chr7_141795813_141795813_A/G
22	chr7_141795819_141795819_G/A
22	chr7_141795820_141795820_G/A
22	chr7_141795834_141795834_G/C
22	chr7_141795841_141795841_T/A
22	chr7_141795850_141795850_A/C
22	chr7_141795851_141795851_A/G
22	chr7_141795863_141795863_T/C
22	chr7_141795864_141795864_G/A
22	chr7_141795870_141795870_G/A
22	chr7_141795873_141795873_G/A
22	chr7_141795875_141795875_T/G
22	chr7_141795886_141795886_G/A
22	chr7_141795894_141795894_G/A
22	chr7_141795897_141795897_C/T
22	chr7_141795900_141795900_G/-
22	chr7_141795910_141795910_A/G
22	chr7_141795918_141795918_T/C
22	chr7_141796008_141796008_A/C
22	chr7_141796011_141796011_G/A
22	chr7_141796215_141796215_T/C
22	chr7_141796308_141796308_A/G
22	chr7_141796384_141796383_-/A
22	chr7_141796427_141796427_A/G
22	chr7_141796458_141796458_T/A
22	chr7_141796462_141796462_T/G
22	chr7_141796477_141796477_G/A
22	chr7_141796499_141796499_G/T
22	chr7_141796500_141796500_G/T
22	chr7_141796509_141796509_A/G
22	chr7_141796533_141796533_G/A
22	chr7_141796538_141796538_C/T
22	chr7_141796579_141796579_T/G
22	chr7_141796580_141796580_G/A
22	chr7_141796634_141796634_G/A
22	chr7_141796676_141796676_A/G
153	chr5_741034_741037_TGAA/-
153	chr5_741129_741128_-/AA
153	chr5_741144_741144_T/C
153	chr5_741442_741442_G/A
153	chr5_741445_741445_G/T
153	chr5_741816_741816_C/G
153	chr5_741953_741953_A/G
153	chr5_741997_741997_A/G
153	chr5_741999_741999_A/G
153	chr5_742067_742067_G/A
153	chr5_742088_742088_T/G
153	chr5_742098_742098_G/A
153	chr5_742196_742196_A/G
153	chr5_742205_742205_G/A
153	chr5_742292_742303_TTTTGTAGAGAT/-
65	chr13_24465147_24465147_C/T
65	chr13_24465170_24465170_T/C
65	chr13_24465179_24465179_A/G
65	chr13_24465181_24465181_A/G
65	chr13_24465279_24465279_T/C
65	chr13_24465307_24465307_G/A
65	chr13_24465402_24465402_C/G
65	chr13_24465407_24465407_A/G
65	chr13_24465413_24465413_A/T
65	chr13_24465432_24465432_T/G
65	chr13_24465529_24465529_T/C
65	chr13_24465562_24465562_T/C
65	chr13_24465589_24465589_C/T
65	chr13_24465600_24465600_C/T
65	chr13_24465623_24465623_G/A
65	chr13_24465650_24465650_C/T
65	chr13_24465717_24465717_A/G
65	chr13_24465743_24465743_A/G
65	chr13_24465775_24465775_C/T
65	chr13_24465941_24465941_C/T
65	chr13_24466094_24466094_T/C
65	chr13_24466232_24466232_T/C
65	chr13_24466302_24466302_A/G
65	chr13_24466356_24466356_G/A
65	chr13_24466433_24466433_T/A
65	chr13_24466436_24466436_C/T
65	chr13_24466452_24466452_T/A
65	chr13_24466470_24466470_T/A
65	chr13_24466475_24466475_A/G
65	chr13_24466476_24466476_T/A
65	chr13_24466479_24466479_T/A
65	chr13_24466481_24466481_A/G
65	chr13_24466529_24466529_T/C
65	chr13_24466563_24466563_A/G
65	chr13_24466564_24466564_G/T
65	chr13_24466565_24466565_A/G
65	chr13_24466600_24466600_G/C
65	chr13_24466615_24466615_A/C
65	chr13_24466622_24466622_C/T
65	chr13_24466636_24466636_G/A
65	chr13_24466648_24466648_A/G
65	chr13_24466654_24466654_T/C
65	chr13_24466662_24466662_C/T
65	chr13_24466663_24466663_A/G
65	chr13_24466669_24466669_T/C
65	chr13_24466676_24466676_C/T
65	chr13_24466684_24466684_T/C
65	chr13_24466734_24466738_CAGTG/-
37	chr22_39381390_39381394_AAGCT/-
37	chr22_39381437_39381437_A/T
37	chr22_39381469_39381471_AGG/-
37	chr22_39381486_39381486_C/T
37	chr22_39381494_39381494_T/C
37	chr22_39381495_39381495_T/C
37	chr22_39381500_39381500_A/C
37	chr22_39381535_39381535_A/G
37	chr22_39381547_39381547_C/A
37	chr22_39381551_39381551_A/G
37	chr22_39381552_39381552_G/C
37	chr22_39381557_39381557_G/A
37	chr22_39381576_39381576_T/C
37	chr22_39381824_39381824_T/C
37	chr22_39381826_39381826_A/C
37	chr22_39381832_39381832_C/G
37	chr22_39381835_39381835_T/C
37	chr22_39381967_39381967_T/G
37	chr22_39381999_39381999_T/C
37	chr22_39382068_39382068_A/G
37	chr22_39382079_39382079_C/A
37	chr22_39382083_39382083_C/T
37	chr22_39382090_39382090_T/G
37	chr22_39382202_39382202_T/C
37	chr22_39382206_39382206_A/G
37	chr22_39382208_39382208_T/C
37	chr22_39382209_39382209_G/A
37	chr22_39382218_39382218_T/A
37	chr22_39382251_39382251_G/C
37	chr22_39382252_39382252_A/G
37	chr22_39382254_39382254_A/G
37	chr22_39382256_39382255_-/C
37	chr22_39382269_39382269_G/C
37	chr22_39382287_39382287_C/T
37	chr22_39382290_39382290_T/C
37	chr22_39382296_39382296_A/G
37	chr22_39382336_39382336_A/G
37	chr22_39382348_39382348_A/C
37	chr22_39382376_39382376_A/C
37	chr22_39382443_39382443_A/G
37	chr22_39382447_39382447_C/G
37	chr22_39382457_39382457_A/G
37	chr22_39382482_39382482_G/C
37	chr22_39382483_39382483_T/C
37	chr22_39382489_39382489_T/A
37	chr22_39382498_39382498_C/T
37	chr22_39382506_39382506_C/G
37	chr22_39382509_39382509_T/C
37	chr22_39382512_39382529_ACCCACTGCCTGCCCTCA/-
37	chr22_39382530_39382530_T/C
6	chr6_167589930_167589935_GTTCGT/-
6	chr6_167590454_167590454_G/A
6	chr6_167590516_167590516_C/A
6	chr6_167590535_167590535_G/C
6	chr6_167590574_167590574_G/C
6	chr6_167590723_167590723_T/G
6	chr6_167590739_167590739_C/T
6	chr6_167590862_167590862_T/C
6	chr6_167590886_167590886_T/C
6	chr6_167590937_167590937_C/T
6	chr6_167590939_167590939_C/T
6	chr6_167591069_167591069_A/G
6	chr6_167591086_167591086_G/A
6	chr6_167591181_167591181_T/C
6	chr6_167591208_167591208_G/A
4	chr6_31958347_31958347_A/-
4	chr6_31962174_31962174_A/G
4	chr6_31962401_31962401_G/A
4	chr6_31963559_31963559_A/G
4	chr6_31963860_31963860_C/T
4	chr6_31963863_31963863_G/C
4	chr6_31963871_31963871_T/A
4	chr6_31963874_31963874_G/C
4	chr6_31963876_31963876_C/T
4	chr6_31964228_31964228_A/G
4	chr6_31964316_31964316_G/C
4	chr6_31964321_31964321_T/C
4	chr6_31964330_31964330_T/G
4	chr6_31964331_31964331_C/G
4	chr6_31964391_31964391_C/G
4	chr6_31964395_31964395_C/-
4	chr6_31964785_31964785_T/G
4	chr6_31965242_31965242_T/C
4	chr6_31965383_31965383_A/G
4	chr1_109009886_109009886_A/G
4	chr1_109009954_109009954_G/A
4	chr1_109010281_109010281_T/C
4	chr1_109010333_109010333_T/C
4	chr1_109010455_109010455_C/T
4	chr1_109010470_109010470_T/C
4	chr1_109010508_109010508_A/G
4	chr1_109010672_109010672_G/C
4	chr1_109010675_109010675_T/C
4	chr1_109010680_109010680_A/G
4	chr1_109010696_109010696_G/A
4	chr1_109010706_109010706_C/T
8	chr7_76240342_76240341_-/CATGT
8	chr7_76240451_76240451_A/G
8	chr7_76240457_76240457_T/C
8	chr7_76240569_76240569_A/-
8	chr7_76240606_76240606_C/-
8	chr7_76240677_76240677_T/G
8	chr7_76240762_76240762_A/G
8	chr7_76240786_76240786_A/-
8	chr7_76240798_76240798_G/C
8	chr7_76240814_76240814_C/T
8	chr7_76240819_76240819_C/T
8	chr7_76240888_76240888_A/G
8	chr7_76240889_76240889_G/A
8	chr7_76241038_76241037_-/CTC
8	chr7_76241244_76241244_G/A
8	chr7_76241245_76241245_A/T
8	chr7_76241279_76241279_G/C
8	chr7_76241292_76241292_T/G
1	chr4_69519525_69519529_AATTT/-
1	chr4_69519602_69519602_A/-
1	chr4_69519605_69519605_C/T
1	chr4_69519619_69519619_G/A
1	chr4_69519624_69519624_G/A
1	chr4_69519625_69519625_A/G
1	chr4_69519678_69519678_A/C
1	chr4_69519681_69519681_C/A
1	chr4_69519687_69519687_A/C
1	chr4_69519691_69519691_T/C
1	chr4_69519719_69519719_A/G
1	chr4_69519723_69519723_A/G
1	chr4_69519742_69519742_C/T
1	chr4_69519756_69519756_C/T
1	chr4_69519916_69519916_C/T
1	chr4_69520000_69520000_A/G
1	chr4_69520011_69520011_C/T
1	chr4_69520016_69520016_T/C
1	chr4_69520018_69520018_T/C
1	chr4_69520019_69520019_G/A
1	chr4_69520020_69520020_A/G
1	chr4_69520124_69520124_A/G
1	chr4_69520128_69520128_T/G
1	chr4_69520129_69520129_T/A
1	chr4_69520130_69520130_G/A
1	chr4_69520131_69520131_C/G
1	chr4_69520134_69520134_G/C
1	chr4_69520135_69520135_G/C
1	chr4_69520145_69520145_T/C
1	chr4_69520146_69520146_G/T
1	chr4_69520147_69520147_A/T
7	chr1_1633822_1633822_T/C
7	chr1_1635004_1635004_T/C
7	chr1_1635011_1635011_A/G
7	chr1_1635022_1635022_A/G
7	chr1_1635049_1635049_G/A
7	chr1_1635061_1635061_C/A
7	chr1_1635225_1635225_T/C
7	chr1_1635226_1635226_G/A
7	chr1_1635227_1635226_-/C
7	chr1_1635229_1635229_A/C
7	chr1_1635230_1635230_T/C
7	chr1_1635234_1635234_T/C
7	chr1_1635246_1635246_G/A
7	chr1_1635272_1635272_T/C
7	chr1_1635293_1635293_C/T
7	chr1_1635296_1635296_A/C
7	chr1_1635344_1635344_G/A
7	chr1_1635385_1635384_-/AGGTCAGGAGAG
1	chr1_1643158_1643157_-/CTGCC
1	chr1_1643324_1643324_G/T
1	chr1_1643497_1643497_G/A
1	chr1_1643571_1643571_A/-
1	chr1_1643910_1643910_G/A
1	chr1_1644351_1644351_T/C
1	chr1_1644426_1644432_TTTTTTT/-
1	chr1_1644572_1644572_A/G
1	chr1_1644596_1644604_TATTTTTAC/-
1	chr1_1644790_1644790_T/C
1	chr1_1644818_1644818_C/T
1	chr1_1644908_1644908_C/T
1	chr1_1644945_1644945_G/A
1	chr1_1644991_1644991_A/G
1	chr1_1645050_1645050_C/T
1	chr1_1645093_1645093_C/T
1	chr1_1645115_1645115_C/T
1	chr1_1645158_1645158_T/G
1	chr1_1645338_1645338_C/T
1	chr1_1645366_1645366_A/G
1	chr1_1645399_1645399_A/G
1	chr1_1645511_1645511_C/G
1	chr1_1645839_1645839_A/-
1	chr1_1645849_1645849_C/T
1	chr1_1645874_1645874_C/T
1	chr1_1645962_1645962_A/G
1	chr1_1646000_1646000_T/C
1	chr1_1646006_1646006_A/G
1	chr1_1646027_1646027_A/C
1	chr1_1646231_1646231_T/C
1	chr1_1646321_1646321_G/A
1	chr1_1646377_1646376_-/TTC
1	chr1_1646507_1646506_-/C
1	chr1_1646574_1646574_T/C
1	chr1_1646657_1646657_T/C
1	chr1_1646724_1646724_C/T
1	chr1_1646789_1646789_T/C
1	chr1_1646875_1646875_C/G
1	chr1_1646899_1646899_T/-
1	chr1_1646917_1646917_C/T
1	chr1_1646980_1646980_A/C
1	chr1_1647200_1647200_G/C
9	chrX_148630348_148630350_AGT/-
9	chrX_148630729_148630729_T/C
9	chrX_148630813_148630813_C/T
9	chrX_148631000_148631000_C/T
8	chr16_222416_222416_C/T
8	chr16_222417_222417_T/C
8	chr16_222869_222869_G/C
8	chr16_223383_223383_T/G
8	chr16_223443_223442_-/GGCCCTC
8	chr16_223447_223447_G/C
8	chr16_223614_223614_A/G
8	chr16_223618_223618_G/A
8	chr16_223620_223620_T/G
8	chr16_223622_223622_C/T
8	chr16_223625_223625_C/T
8	chr16_223631_223631_G/C
8	chr16_223632_223632_C/T
8	chr16_223643_223643_A/C
8	chr16_223644_223644_A/C
8	chr16_223646_223646_G/A
8	chr16_223648_223648_G/C
8	chr16_223661_223661_C/T
8	chr16_223663_223663_T/C
8	chr16_223670_223670_G/C
8	chr16_223672_223672_C/T
8	chr16_223673_223672_-/A
8	chr16_223675_223675_T/C
8	chr16_223676_223676_T/C
8	chr16_223678_223678_C/G
8	chr16_223706_223706_A/G
8	chr16_223725_223725_G/A
8	chr16_223729_223729_C/T
8	chr16_223731_223731_C/T
8	chr16_223734_223734_T/C
8	chr16_223735_223735_A/C
8	chr16_223738_223738_C/A
8	chr16_223739_223739_C/G
8	chr16_223740_223740_G/C
8	chr16_223741_223741_G/A
8	chr16_223744_223744_T/C
8	chr16_223751_223751_A/G
8	chr16_223752_223752_C/G
8	chr16_223753_223753_A/C
8	chr16_223758_223758_A/G
8	chr16_223759_223759_G/C
8	chr16_223763_223763_T/G
8	chr16_223764_223764_T/A
8	chr16_223765_223765_T/C
8	chr16_223767_223767_C/G
8	chr16_223769_223769_T/A
8	chr16_223771_223771_T/C
8	chr16_223773_223773_T/A
8	chr16_223776_223776_G/T
8	chr16_223777_223777_A/G
8	chr16_223778_223778_C/G
8	chr16_223780_223780_A/T
8	chr16_223783_223783_G/A
8	chr16_223799_223799_C/G
8	chr16_223802_223802_G/A
8	chr16_223806_223806_C/T
8	chr16_223807_223807_T/A
8	chr16_223810_223810_G/A
8	chr16_223811_223811_G/A
8	chr16_223813_223813_G/A
8	chr16_223815_223821_GAGAACT/-
8	chr16_223828_223828_A/G
8	chr16_223829_223829_G/C
8	chr16_223830_223830_T/G
8	chr16_223831_223831_A/G
8	chr16_223832_223832_T/G
8	chr16_223833_223833_G/A
8	chr16_223842_223926_AGCTGAGGTGGGCCTGCTCAAGAGAAGGTGCTGAACCATCCCCTGTCCTGAGAGGTGCCAGGCCTGCAGGCAGTGGCTCAGAAGC/-
8	chr16_223930_223930_G/A
50	chr2_96261708_96261707_-/ATCA
50	chr2_96261890_96261890_A/G
50	chr2_96261953_96261953_A/G
50	chr2_96262165_96262165_T/G
50	chr2_96262279_96262279_T/C
38	chr1_1588326_1588325_-/AGCATAATAAAGTGAAGTG
38	chr1_1588365_1588365_G/A
38	chr1_1588367_1588369_TAA/-
38	chr1_1588371_1588371_G/A
38	chr1_1588460_1588460_T/C
38	chr1_1588531_1588531_C/T
38	chr1_1588536_1588535_-/TAA
38	chr1_1588663_1588683_TTTGAATGTTTTTGTTAATTT/-
38	chr1_1588692_1588692_G/C
38	chr1_1588809_1588808_-/A
38	chr1_1589331_1589331_C/G
38	chr1_1589353_1589356_AAAA/-
38	chr1_1589413_1589413_A/G
60	chr1_1656544_1656544_T/C
60	chr1_1656593_1656593_G/C
60	chr1_1656778_1656778_C/A
[truncated: 2,438 more rows]
