# Supplementary material for: Systematic analysis of paralogous regions in 41,755 exomes uncovers clinically relevant variation
Source: Research Square preprint supplement (doi:10.21203/rs.3.rs-2302399/v1), 2022-11-29
Supplement: Supplementary file 18 [file STable4.xlsx]

## Sheet: STable4
Recurrence	Chrom	Start	End
1	chr1	1393948	1416350
5	chr1	1413783	1426115
42	chr1	1416224	1416350
8	chr1	1416224	1426115
2	chr1	1425942	1426115
1	chr1	1590989	1654856
14	chr1	1633797	1654856
16	chr1	1633797	1671591
3	chr1	1633797	1647254
55	chr1	1633797	1657433
3	chr1	1633797	1635384
1	chr1	1633797	1641658
1	chr1	1635926	1657433
1	chr1	1638407	1657433
2	chr1	1638407	1641658
1	chr1	1643158	1671591
16	chr1	1653649	1654856
27	chr1	1653649	1657433
15	chr1	1656282	1657433
1	chr1	1669261	1671591
1	chr1	22315158	22316429
15	chr1	22328577	22339613
3	chr1	22328577	22337252
4	chr1	22328577	22329718
3	chr1	22336031	22339613
669	chr1	22338347	22339613
1	chr1	24293769	24294856
2	chr1	40525726	40525854
1	chr1	44316894	44317056
1	chr1	47173570	47173733
2	chr1	48790935	48791687
3	chr1	48791163	48791305
14	chr1	48791163	48791687
4	chr1	48791163	48791525
17	chr1	48791411	48791687
10	chr1	48791411	48791525
1	chr1	48791524	48791687
2	chr1	51735688	51735805
1	chr1	92469958	92470183
6	chr1	120510743	120511055
1	chr1	155183958	155184916
83	chr1	159014494	159019916
1	chr1	161487175	161518898
2	chr1	161493892	161496268
74	chr1	161598943	161600257
2	chr1	171560815	171561186
1529	chr1	196758598	196800336
82	chr1	196758598	196759972
556	chr1	196799146	196800336
3	chr1	196799146	196884878
327	chr1	207704919	207724877
21	chr1	220800324	220800431
4	chr1	231557255	231557656
7	chr1	235643362	235658151
1	chr1	235643362	235643465
1	chr1	235647629	235647775
93	chr1	235658033	235658151
207	chr1	248721152	248723357
3	chr1	248812947	248814673
1	chr10	37626336	37626443
2	chr10	44101482	44101591
18	chr10	48026809	48028136
4	chr10	48026809	48033607
34	chr10	48028650	48029888
3	chr10	48032401	48033607
18	chr10	51972092	51973418
4	chr10	51972092	51978888
3	chr10	51977691	51978888
5	chr10	56359738	56360643
1	chr10	74987807	74987951
2	chr10	89725049	89725253
1	chr10	102107061	102107297
1	chr10	103454127	103454912
1	chr11	13743264	13743414
1	chr11	46389191	46389306
2	chr11	49192223	49193387
15	chr11	63010884	63011203
5	chr11	63010884	63011066
2	chr11	89530783	89532312
12	chr11	89533443	89534765
473	chr11	89771251	89772572
5	chr11	89773644	89775232
1	chr11	102098216	102098318
10	chr11	104936690	104936872
5	chr11	104941265	104941378
180	chr12	11505075	11549097
32	chr12	11505075	11547187
6	chr12	11507921	11549097
114	chr12	27650993	27651168
1	chr12	44191501	44191648
8	chr12	93803663	93803869
2	chr12	94818362	94818455
1	chr12	94818511	94818681
4	chr13	35683382	35685202
3	chr13	35683382	35683779
1	chr13	35684746	35685202
1	chr13	35684746	35685047
3	chr13	35685075	35685202
5	chr13	51952369	51952602
4	chr13	51952369	51961688
1	chr13	51952369	51957885
1	chr13	51953589	51953719
1	chr13	51957463	51957608
1	chr13	51957463	51961688
1	chr13	51957715	51969631
1	chr13	51957715	51957885
2	chr13	51957715	51961688
3	chr13	51961511	51961688
2	chr13	52004421	52004531
17	chr14	24437431	24475728
1	chr14	36041757	36041934
22	chr14	36064829	36065007
1	chr14	36143713	36191067
1	chr14	36143713	36143928
11	chr14	36190884	36191067
3	chr14	36190884	36211783
3	chr14	36190884	36192482
1	chr14	36192224	36211783
1	chr14	36197558	36197728
4	chr14	36211565	36211783
1	chr14	36219679	36219907
2	chr14	36230024	36230224
2	chr14	57686031	57686171
1	chr14	57713425	57713583
1	chr14	105715481	105715592
376	chr15	22382400	22383065
19	chr15	30662708	30665964
12	chr15	30922317	30927210
2	chr15	43872496	43940464
24	chr15	43890861	43940464
1	chr15	43890861	43897797
1	chr15	43890861	43901732
11	chr15	43895239	43940464
1	chr15	43895239	43939865
1	chr15	43924196	43940464
1	chr15	43931640	43932196
1	chr15	43931640	43932894
34	chr15	44741089	44741434
44	chr15	44741089	44741243
9	chr15	44741242	44741434
1	chr15	50789272	50789432
3	chr15	50790781	50790936
1	chr15	80423510	80423644
1	chr15	82532558	82532760
1	chr15	100185838	100185977
1	chr16	111788	112057
192	chr16	222411	223930
3	chr16	16356373	16357494
2	chr16	18542358	18543483
18	chr16	20450921	20451949
1	chr16	20450921	20451441
2	chr16	20451465	20451949
1	chr16	20482441	20482529
5	chr16	21747381	21747911
1	chr16	21747381	21764645
61	chr16	21764147	21764645
1	chr16	22441238	22441343
2120	chr16	28400917	28404059
4	chr16	70210617	70211916
3	chr16	70888465	70889617
4	chr16	70936970	70938492
1	chr16	71014830	71066362
4	chr16	71061021	71062356
1	chr16	71061021	71066362
1	chr16	71065068	71066362
2	chr16	72088471	72097188
34	chr16	74451433	74452708
1	chr16	89334792	89335015
1	chr17	708348	708469
1	chr17	2595046	2595204
14	chr17	15508030	15509342
1	chr17	15638202	15642687
1	chr17	18604094	18605256
2	chr17	19061112	19123768
2	chr17	20483026	20484252
4	chr17	29103114	29103620
213	chr17	34522169	34643180
606	chr17	34522169	34626285
2	chr17	34537955	34643180
1	chr17	39382783	39395466
28	chr17	39394135	39395466
1	chr17	39502970	39521882
4	chr17	39521294	39521882
4	chr17	49248835	49249117
1	chr17	53040659	53040802
588	chr17	57656632	57657440
1	chr17	57656632	57665614
1	chr17	61949421	61974461
1	chr17	61972317	61974461
2	chr18	46807	47992
1	chr18	18531144	18531548
8	chr18	48444469	48444591
4	chr18	48452114	48452268
1	chr19	16682745	16682847
1874	chr19	35861599	35863887
90	chr19	40373452	40390400
15	chr19	41381688	41386030
2	chr19	41381688	41381967
3	chr19	41382402	41384738
10	chr19	43258145	43259297
18	chr19	43371912	43529455
8	chr19	43371912	43373067
8	chr19	43528308	43529455
3	chr19	43528308	43585645
1	chr19	43584499	43585645
2	chr19	48306239	48307479
800	chr19	52132493	52150348
19	chr19	54723985	54744821
3	chr19	54881264	54882493
3	chr19	55258847	55259008
1	chr19	55258847	55325654
171	chr19	55314473	55318389
18	chr19	55314473	55325654
5	chr19	55319803	55325654
1	chr19	55319803	55321060
1	chr19	55325256	55325654
12	chr2	96261525	96262626
6	chr2	96697933	96698118
3	chr2	97779611	97779873
3	chr2	97779611	97790534
2	chr2	97789996	97790534
1	chr2	97817717	97818770
1	chr2	110321934	110332356
2	chr2	110321934	110322123
2	chr2	112535610	112536892
4	chr2	114714925	114715030
7	chr2	159514630	159514834
1	chr2	171862674	171862804
1	chr2	172582419	172585368
3	chr2	174777791	174778006
1	chr2	179368476	179368814
4	chr2	179519097	179524574
1	chr2	223488984	223489145
1	chr2	233244945	233274616
24	chr2	241631260	241632517
28	chr20	14527631	14527957
2	chr20	14527999	14528111
2	chr20	33264751	33264921
5	chr21	27136893	27137105
1	chr21	27141301	27141743
8	chr21	39610478	39610589
2	chr22	38765795	38766254
207	chr22	39357103	39387954
3	chr22	39357103	39388551
43	chr22	39381390	39382530
1	chr22	42522382	42526533
17	chr22	42524350	42526533
12	chr22	42950427	42953183
3	chr22	50873293	50873397
10	chr3	10090857	10091389
7	chr3	33896825	33896952
1	chr3	69073195	69073344
73	chr3	75785403	75789040
290	chr3	75785403	75791554
368	chr3	75790026	75791554
1	chr3	123693630	123695141
1	chr3	131100872	131100975
1	chr3	131181366	131181731
1	chr3	131220368	131220571
1	chr3	133894442	133894562
3	chr3	151545656	151545816
1	chr3	158523139	158523272
1	chr3	195451350	195452001
2	chr4	1388723	1389370
1	chr4	68384926	68385232
1	chr4	68396524	68396644
1	chr4	68405549	68405662
1	chr4	69416171	69416780
5	chr4	69816831	70383637
1	chr4	71249926	71250603
24	chr4	75481491	75482751
2	chr4	77265804	77265918
1	chr4	78649996	78650247
1	chr4	78652532	78652702
15	chr4	84398669	84398765
3	chr4	84398669	84398890
3	chr4	84398764	84398890
1	chr4	84399534	84399780
1	chr4	104013747	104013864
2	chr4	144939857	144940980
4	chr4	146065454	146065578
1	chr4	186185586	186185772
12	chr5	711742	767527
1	chr5	711742	712691
1	chr5	711742	745875
29	chr5	741034	742303
6	chr5	741034	745875
13	chr5	741034	767527
1	chr5	741034	796988
2	chr5	744782	745875
20	chr5	767330	767527
1	chr5	767330	796988
37	chr5	833215	834482
1	chr5	32417807	32417907
5	chr5	68572921	68573148
68	chr5	68830320	68830866
3	chr5	68830320	69373507
1837	chr5	69372181	69373507
10	chr5	70247601	70248925
7	chr5	70837270	70837517
1	chr5	82352870	82352984
1	chr5	87536622	87536747
4	chr5	140208046	140222559
8	chr5	140213808	140229556
1	chr5	171337567	171337813
1	chr5	175540237	175541557
2	chr5	177150614	177151925
1	chr5	177150614	177180680
26	chr5	177457120	177458319
53	chr5	180375528	180376338
1	chr6	8090410	8090524
1	chr6	31246070	31246211
73	chr6	31958347	31967991
237	chr6	31973323	31975068
475	chr6	31973323	31980589
187	chr6	31975337	31980589
34	chr6	31991086	32000726
18	chr6	32489764	32489842
12	chr6	32551968	32552046
2	chr6	56954921	56956366
2	chr6	110422902	110423021
1	chr6	129479932	129480036
5	chr6	133019917	133020177
10	chr6	133019917	133020407
6	chr6	133020176	133020407
1	chr6	136594211	136594337
5	chr6	160873783	160875059
78	chr6	166999430	166999790
1	chr7	5770145	5770648
12	chr7	5944221	5945557
1	chr7	5944221	6018627
1	chr7	6804670	6807083
3	chr7	6804670	6860075
1	chr7	6825000	6827241
3	chr7	6851048	6860075
3	chr7	6853879	6855032
2	chr7	6858737	6860075
7	chr7	7948748	7949150
10	chr7	7949037	7949150
6	chr7	33102170	33102422
6	chr7	34790104	34790233
4	chr7	34790104	34790403
5	chr7	34790104	34791500
3	chr7	34790104	34791333
1	chr7	34790104	34791052
1	chr7	34790104	34791162
5	chr7	34790232	34790403
1	chr7	34790232	34791500
1	chr7	34790928	34791500
1	chr7	34791051	34791333
2	chr7	34791332	34791500
2	chr7	35006484	35006783
1	chr7	35942291	35943402
1	chr7	63981738	63981854
1	chr7	65082423	65082983
2	chr7	65413034	65414311
4	chr7	72429903	72432673
1	chr7	76109626	76256890
6	chr7	76240341	76241526
25	chr7	96324100	96324213
1	chr7	102135977	102137319
1	chr7	102140497	102241133
1	chr7	108206265	108206476
1322	chr7	141762100	141796686
8	chr7	141762100	141792097
16	chr7	141766564	141796686
6	chr7	143955035	143957354
47	chr8	7307585	7308928
1	chr8	7307585	7346235
2	chr8	7396622	7400122
2	chr8	7680364	7687117
2	chr8	7680364	7721599
2	chr8	7680364	7683345
58	chr8	7685679	7687117
38	chr8	7717660	7719002
93	chr8	7719139	7721599
1	chr8	72967679	72968322
5	chr8	87392943	87393103
1	chr8	145301663	145303143
4	chr9	5303460	5304871
1	chr9	5338620	5340029
1	chr9	6498005	6498165
1	chr9	6595005	6595131
18	chr9	80430521	80430696
1	chr9	80537071	80537272
705	chr9	84545162	84547705
160	chr9	84545162	84547446
94	chr9	84547505	84547705
54	chr9	84560253	84562537
1	chr9	95073417	95073552
2	chr9	108282900	108283081
22	chr9	108288061	108288220
1	chr9	117091562	117093426
1	chr9	135943858	135947292
1	chr9	138453447	138453807
1	chrX	1463642	1464891
5	chrX	2748029	2761595
1	chrX	2748029	7175592
1	chrX	2748029	2990416
1	chrX	2760831	2761595
1	chrX	3030399	3030628
2	chrX	7175178	7175592
4	chrX	7177189	7890159
1	chrX	7177189	7177480
3	chrX	7889875	7890159
1	chrX	46360154	46513169
1	chrX	46480395	46480505
1	chrX	46508113	46508242
1	chrX	46508113	46510645
56	chrX	55116384	55117481
1	chrX	57418825	57421607
1	chrX	57418825	57419075
1	chrX	57418825	57419600
2	chrX	57419424	57419600
1	chrX	64947663	64957209
2	chrX	64947663	64958487
4	chrX	64949291	64949582
1	chrX	64956651	64956792
1	chrX	64957027	64957209
4	chrX	70811771	70815155
1	chrX	89176618	89177995
1	chrX	117758489	117758628
1	chrX	117782895	117783096
1	chrX	117817029	117817188
1	chrX	123306743	123307137
1	chrX	129506872	129507124
70	chrX	145890635	145896912
2	chrX	148584519	148607784
1	chrX	148626779	148629020
1	chrX	148626779	148631479
26	chrX	148630348	148631479
73	chrX	149097780	149098909
1	chrX	149097780	149102484
119	chrX	153456587	153495110
3	chrX	154305433	154305573
1	chrX	154344319	154344471
1	chrY	1413643	1414891
8	chrY	6938036	6939955
76	chrY	20709770	20709923
