# Supplementary material for: Systematic analysis of paralogous regions in 41,755 exomes uncovers clinically relevant variation
Source: Research Square preprint supplement (doi:10.21203/rs.3.rs-2302399/v1), 2022-11-29
Supplement: Supplementary file 20 [file STable6.xlsx]

## Sheet: STable6
Sample	Deletion/Conversion	Chrom	Start	End	CallValidated
SAMPLE_15443	Conversion	chr19	40373452	40390400	1
SAMPLE_17545	Conversion	chr16	28400917	28404059	1
SAMPLE_17546	Conversion	chr16	28400917	28404059	1
SAMPLE_17602	Conversion	chr1	22338347	22339613	1
SAMPLE_17603	Conversion	chr2	96697933	96698118	1
SAMPLE_17971	Conversion	chr1	248721152	248723357	1
SAMPLE_18244	Conversion	chr2	96697933	96698118	1
SAMPLE_18603	Conversion	chr11	89771251	89772572	1
SAMPLE_14579	Deletion	chr19	55314473	55318389	1
SAMPLE_14580	Deletion	chr19	55314473	55318389	1
SAMPLE_15442	Deletion	chr6	31973323	31975068	1
SAMPLE_15444	Deletion	chr1	196758598	196800336	1
SAMPLE_17545	Deletion	chr9	84545162	84547705	1
SAMPLE_17546	Deletion	chr19	35861599	35863887	0
SAMPLE_17546	Deletion	chr5	69372181	69373507	1
SAMPLE_17603	Deletion	chr19	35861599	35863887	0
SAMPLE_17603	Deletion	chr19	52132493	52150348	1
SAMPLE_17603	Deletion	chr6	31973323	31980589	1
SAMPLE_17971	Deletion	chr1	196758598	196800336	1
SAMPLE_17971	Deletion	chr19	35861599	35863887	0
SAMPLE_17972	Deletion	chr1	196758598	196800336	1
SAMPLE_18602	Deletion	chr19	35861599	35863887	0
SAMPLE_18603	Deletion	chr6	31973323	31980589	1
