# Supplementary material for: Systematic analysis of paralogous regions in 41,755 exomes uncovers clinically relevant variation
Source: Research Square preprint supplement (doi:10.21203/rs.3.rs-2302399/v1), 2022-11-29
Supplement: Supplementary file 21 [file STable7.xlsx]

## Sheet: STable7
Child	NrOfVariantsChild_010	NrOfDNMs_010	NrOfVariantsChild_0005	NrOfDNMs_0005
SAMPLE_1	77	0	9	0
SAMPLE_10	64	0	2	0
SAMPLE_100	53	1	5	0
SAMPLE_1000	66	0	6	0
SAMPLE_10000	76	1	21	0
SAMPLE_10003	56	0	8	0
SAMPLE_10006	52	1	4	0
SAMPLE_10009	58	0	4	0
SAMPLE_10012	41	0	3	0
SAMPLE_10015	48	0	1	0
SAMPLE_10018	90	0	14	0
SAMPLE_10021	59	2	3	0
SAMPLE_10024	90	0	6	0
SAMPLE_10027	72	0	5	0
SAMPLE_1003	57	2	5	2
SAMPLE_10030	89	0	15	0
SAMPLE_10033	52	0	4	0
SAMPLE_10036	56	0	4	0
SAMPLE_10039	62	2	5	0
SAMPLE_10042	69	1	10	0
SAMPLE_10045	174	0	70	0
SAMPLE_10048	53	0	3	0
SAMPLE_10051	47	0	1	0
SAMPLE_10054	74	0	11	0
SAMPLE_10057	99	2	12	0
SAMPLE_1006	65	1	7	0
SAMPLE_10060	49	0	4	0
SAMPLE_10063	58	0	6	0
SAMPLE_10066	83	1	4	0
SAMPLE_10069	35	0	4	0
SAMPLE_10072	78	1	10	1
SAMPLE_10075	64	0	7	0
SAMPLE_10078	44	0	3	0
SAMPLE_10081	97	0	12	0
SAMPLE_10084	39	1	5	0
SAMPLE_10087	75	0	7	0
SAMPLE_1009	62	4	4	1
SAMPLE_10090	55	0	4	0
SAMPLE_10093	75	1	9	0
SAMPLE_10096	57	0	2	0
SAMPLE_10099	67	1	8	1
SAMPLE_10102	67	0	5	0
SAMPLE_10105	93	0	8	0
SAMPLE_10108	69	0	4	0
SAMPLE_10111	74	0	4	0
SAMPLE_10114	57	0	4	0
SAMPLE_10117	55	0	7	0
SAMPLE_1012	60	0	5	0
SAMPLE_10120	47	1	3	0
SAMPLE_10123	63	0	4	0
SAMPLE_10126	46	1	6	0
SAMPLE_10129	51	0	4	0
SAMPLE_10132	84	0	2	0
SAMPLE_10135	77	2	5	0
SAMPLE_10138	64	2	6	0
SAMPLE_10141	115	0	23	0
SAMPLE_10144	62	1	8	0
SAMPLE_10147	120	1	22	0
SAMPLE_1015	89	1	14	0
SAMPLE_10150	55	0	4	0
SAMPLE_10153	44	0	6	0
SAMPLE_10156	72	0	4	0
SAMPLE_10159	47	1	4	0
SAMPLE_10162	107	0	9	0
SAMPLE_10165	64	1	16	0
SAMPLE_10168	39	1	4	0
SAMPLE_10171	55	1	5	0
SAMPLE_10174	44	0	2	0
SAMPLE_10177	67	1	5	0
SAMPLE_1018	35	0	4	0
SAMPLE_10180	61	3	7	1
SAMPLE_10183	71	0	5	0
SAMPLE_10186	91	0	18	0
SAMPLE_10189	128	2	36	2
SAMPLE_10192	56	0	4	0
SAMPLE_10195	72	0	5	0
SAMPLE_10198	60	0	6	0
SAMPLE_10201	78	1	13	0
SAMPLE_10204	62	0	11	0
SAMPLE_10207	55	0	9	0
SAMPLE_1021	66	1	3	0
SAMPLE_10210	52	1	5	0
SAMPLE_10213	59	0	4	0
SAMPLE_10216	48	1	4	0
SAMPLE_10219	77	1	7	0
SAMPLE_10222	78	0	6	0
SAMPLE_10225	69	1	5	0
SAMPLE_10228	60	0	8	0
SAMPLE_10231	76	1	10	0
SAMPLE_10234	73	1	9	0
SAMPLE_10237	59	1	8	0
SAMPLE_1024	69	2	2	0
SAMPLE_10240	60	1	5	0
SAMPLE_10243	59	0	8	0
SAMPLE_10246	112	0	40	0
SAMPLE_10249	77	0	17	0
SAMPLE_10252	62	3	8	0
SAMPLE_10255	69	0	3	0
SAMPLE_10258	54	0	2	0
SAMPLE_10261	70	1	6	1
SAMPLE_10264	68	0	9	0
SAMPLE_10267	44	2	1	0
SAMPLE_1027	110	0	6	0
SAMPLE_10270	108	0	28	0
SAMPLE_10273	76	0	8	0
SAMPLE_10276	67	0	3	0
SAMPLE_10279	80	0	3	0
SAMPLE_10282	85	1	12	0
SAMPLE_10285	59	1	6	0
SAMPLE_10288	96	0	13	0
SAMPLE_10291	76	0	6	0
SAMPLE_10294	59	3	7	1
SAMPLE_10297	71	2	5	0
SAMPLE_103	62	0	5	0
SAMPLE_1030	62	0	7	0
SAMPLE_10300	48	1	5	0
SAMPLE_10303	80	2	10	1
SAMPLE_10306	97	0	17	0
SAMPLE_10309	101	1	4	0
SAMPLE_10312	77	0	4	0
SAMPLE_10315	80	1	8	0
SAMPLE_10318	44	2	4	0
SAMPLE_10321	70	0	10	0
SAMPLE_10324	43	0	4	0
SAMPLE_10327	40	1	5	0
SAMPLE_1033	57	3	5	0
SAMPLE_10330	72	1	4	0
SAMPLE_10333	99	2	11	0
SAMPLE_10336	61	0	6	0
SAMPLE_10339	65	0	4	0
SAMPLE_10342	88	0	13	0
SAMPLE_10345	101	1	13	0
SAMPLE_10348	75	0	7	0
SAMPLE_10351	75	0	7	0
SAMPLE_10354	80	0	5	0
SAMPLE_10357	78	0	6	0
SAMPLE_1036	55	1	2	0
SAMPLE_10360	67	0	3	0
SAMPLE_10363	97	0	29	0
SAMPLE_10366	61	0	8	0
SAMPLE_10369	74	1	6	0
SAMPLE_10372	54	0	2	0
SAMPLE_10375	32	0	2	0
SAMPLE_10378	60	0	2	0
SAMPLE_10381	92	1	8	0
SAMPLE_10384	86	0	13	0
SAMPLE_10387	59	1	7	0
SAMPLE_1039	50	1	3	0
SAMPLE_10390	74	2	5	0
SAMPLE_10393	88	1	6	0
SAMPLE_10396	113	0	14	0
SAMPLE_10399	70	2	7	1
SAMPLE_10402	84	0	9	0
SAMPLE_10405	61	0	8	0
SAMPLE_10408	54	0	5	0
SAMPLE_10411	58	0	9	0
SAMPLE_10414	69	0	5	0
SAMPLE_10417	92	2	11	0
SAMPLE_1042	58	0	1	0
SAMPLE_10420	75	0	6	0
SAMPLE_10423	60	0	11	0
SAMPLE_10426	46	0	4	0
SAMPLE_10429	65	0	4	0
SAMPLE_10432	111	1	12	0
SAMPLE_10435	65	0	6	0
SAMPLE_10438	45	0	3	0
SAMPLE_10441	58	1	6	0
SAMPLE_10444	61	1	6	1
SAMPLE_10447	43	1	6	0
SAMPLE_1045	64	1	2	0
SAMPLE_10450	71	0	6	0
SAMPLE_10453	46	0	7	0
SAMPLE_10456	56	2	7	0
SAMPLE_10459	87	3	9	0
SAMPLE_10462	89	1	14	0
SAMPLE_10465	64	1	3	0
SAMPLE_10468	68	0	5	0
SAMPLE_10471	54	1	5	0
SAMPLE_10474	60	1	7	0
SAMPLE_10477	73	1	7	0
SAMPLE_1048	53	1	2	0
SAMPLE_10480	54	0	8	0
SAMPLE_10483	67	0	5	0
SAMPLE_10486	51	1	6	0
SAMPLE_10489	62	0	8	0
SAMPLE_10492	85	0	7	0
SAMPLE_10495	89	2	8	0
SAMPLE_10498	82	0	18	0
SAMPLE_10501	133	0	40	0
SAMPLE_10504	71	0	9	0
SAMPLE_10507	78	0	6	0
SAMPLE_1051	45	0	1	0
SAMPLE_10510	67	0	10	0
SAMPLE_10513	84	0	5	0
SAMPLE_10516	70	1	8	1
SAMPLE_10519	87	0	9	0
SAMPLE_10522	127	1	26	0
SAMPLE_10525	42	0	4	0
SAMPLE_10528	51	2	1	0
SAMPLE_10531	72	0	6	0
SAMPLE_10534	68	0	9	0
SAMPLE_10537	87	0	8	0
SAMPLE_1054	53	0	3	0
SAMPLE_10540	70	1	5	0
SAMPLE_10543	78	1	6	0
SAMPLE_10546	118	0	14	0
SAMPLE_10549	86	1	8	0
SAMPLE_10552	76	2	9	0
SAMPLE_10555	61	0	6	0
SAMPLE_10558	69	0	7	0
SAMPLE_10561	65	1	8	0
SAMPLE_10564	86	3	9	0
SAMPLE_10567	80	1	9	0
SAMPLE_1057	85	1	4	0
SAMPLE_10570	99	1	4	0
SAMPLE_10573	78	1	9	0
SAMPLE_10576	79	1	7	0
SAMPLE_10579	50	0	2	0
SAMPLE_10582	79	1	7	0
SAMPLE_10585	86	0	3	0
SAMPLE_10588	45	1	2	0
SAMPLE_10591	104	1	10	0
SAMPLE_10594	59	1	6	0
SAMPLE_10597	92	3	8	0
SAMPLE_106	64	0	7	0
SAMPLE_1060	42	3	5	0
SAMPLE_10600	62	1	12	1
SAMPLE_10603	45	0	4	0
SAMPLE_10606	83	2	2	0
SAMPLE_10609	80	1	5	0
SAMPLE_10612	63	0	10	0
SAMPLE_10615	72	0	6	0
SAMPLE_10618	61	0	5	0
SAMPLE_10621	76	0	7	0
SAMPLE_10624	67	1	6	0
SAMPLE_10627	65	0	5	0
SAMPLE_1063	46	1	2	0
SAMPLE_10630	43	0	2	0
SAMPLE_10633	59	1	5	0
SAMPLE_10636	85	0	4	0
SAMPLE_10639	60	0	6	0
SAMPLE_10642	85	0	6	0
SAMPLE_10645	80	2	15	1
SAMPLE_10648	83	0	10	0
SAMPLE_10651	77	1	8	0
SAMPLE_10654	87	1	17	0
SAMPLE_10657	49	0	6	0
SAMPLE_1066	56	0	1	0
SAMPLE_10660	73	0	6	0
SAMPLE_10663	73	0	10	0
SAMPLE_10666	59	2	7	0
SAMPLE_10669	55	0	3	0
SAMPLE_10672	91	1	7	0
SAMPLE_10675	73	0	8	0
SAMPLE_10678	65	0	3	0
SAMPLE_10681	48	0	3	0
SAMPLE_10684	169	0	59	0
SAMPLE_10687	63	1	8	0
SAMPLE_1069	74	2	9	0
SAMPLE_10690	68	0	4	0
SAMPLE_10693	47	0	5	0
SAMPLE_10696	71	1	11	1
SAMPLE_10699	62	3	3	1
SAMPLE_10702	66	1	14	0
SAMPLE_10705	65	2	4	0
SAMPLE_10708	70	1	5	0
SAMPLE_10711	50	0	9	0
SAMPLE_10714	77	0	8	0
SAMPLE_10717	46	1	9	1
SAMPLE_1072	71	1	5	0
SAMPLE_10720	110	0	13	0
SAMPLE_10723	89	0	18	0
SAMPLE_10726	145	0	32	0
SAMPLE_10729	61	1	2	0
SAMPLE_10732	51	0	5	0
SAMPLE_10735	78	0	3	0
SAMPLE_10738	39	1	5	0
SAMPLE_10741	65	0	2	0
SAMPLE_10744	62	0	5	0
SAMPLE_10747	41	1	6	0
SAMPLE_1075	121	1	5	1
SAMPLE_10750	43	1	3	0
SAMPLE_10753	74	1	3	0
SAMPLE_10756	91	0	16	0
SAMPLE_10759	108	0	25	0
SAMPLE_10762	104	2	16	0
SAMPLE_10765	55	1	3	0
SAMPLE_10768	82	0	13	0
SAMPLE_10771	66	1	6	0
SAMPLE_10774	70	2	9	0
SAMPLE_10777	50	0	9	0
SAMPLE_1078	96	2	6	0
SAMPLE_10780	58	1	7	0
SAMPLE_10783	72	1	3	0
SAMPLE_10786	39	0	3	0
SAMPLE_10789	89	0	1	0
SAMPLE_10792	30	2	2	0
SAMPLE_10795	85	1	7	0
SAMPLE_10798	50	0	3	0
SAMPLE_10801	70	0	8	0
SAMPLE_10804	65	0	5	0
SAMPLE_10807	85	0	10	0
SAMPLE_1081	389	2	298	0
SAMPLE_10810	94	1	14	1
SAMPLE_10813	58	0	10	0
SAMPLE_10816	61	0	5	0
SAMPLE_10819	86	0	7	0
SAMPLE_10822	81	0	9	0
SAMPLE_10825	65	0	6	0
SAMPLE_10828	53	1	6	0
SAMPLE_10831	77	0	18	0
SAMPLE_10834	56	3	4	0
SAMPLE_10837	76	2	7	0
SAMPLE_1084	55	1	13	0
SAMPLE_10840	83	0	4	0
SAMPLE_10843	44	0	4	0
SAMPLE_10846	94	0	7	0
SAMPLE_10849	66	2	4	0
SAMPLE_10852	54	0	6	0
SAMPLE_10855	94	0	5	0
SAMPLE_10858	180	0	56	0
SAMPLE_10861	64	2	7	0
SAMPLE_10864	57	0	4	0
SAMPLE_10867	52	1	6	0
SAMPLE_1087	60	0	13	0
SAMPLE_10870	81	2	11	0
SAMPLE_10873	63	0	12	0
SAMPLE_10876	39	0	2	0
SAMPLE_10879	68	0	6	0
SAMPLE_10882	123	1	19	1
SAMPLE_10885	84	0	12	0
SAMPLE_10888	54	0	3	0
SAMPLE_10891	83	1	8	0
SAMPLE_10894	103	1	11	0
SAMPLE_10897	114	0	17	0
SAMPLE_109	38	0	1	0
SAMPLE_1090	60	0	1	0
SAMPLE_10900	124	0	15	0
SAMPLE_10903	118	3	12	0
SAMPLE_10906	81	1	3	0
SAMPLE_10909	102	0	18	0
SAMPLE_10912	70	0	5	0
SAMPLE_10915	106	0	8	0
SAMPLE_10918	78	0	8	0
SAMPLE_10921	71	0	5	0
SAMPLE_10924	89	1	7	0
SAMPLE_10927	88	0	8	0
SAMPLE_1093	82	2	2	1
SAMPLE_10930	44	0	6	0
SAMPLE_10933	74	0	14	0
SAMPLE_10936	94	0	8	0
SAMPLE_10939	84	0	27	0
SAMPLE_10942	63	1	2	0
SAMPLE_10945	114	0	8	0
SAMPLE_10948	63	0	2	0
SAMPLE_10951	72	0	8	0
SAMPLE_10954	82	4	14	1
SAMPLE_10957	125	1	13	0
SAMPLE_1096	67	1	2	0
SAMPLE_10960	91	0	7	0
SAMPLE_10963	81	0	8	0
SAMPLE_10966	42	1	3	0
SAMPLE_10969	102	0	18	0
SAMPLE_10972	59	0	13	0
SAMPLE_10975	66	1	10	0
SAMPLE_10978	82	0	26	0
SAMPLE_10981	52	0	5	0
SAMPLE_10984	60	1	7	0
SAMPLE_10987	86	1	9	0
SAMPLE_1099	44	1	1	0
SAMPLE_10990	58	0	10	0
SAMPLE_10993	78	0	7	0
SAMPLE_10996	47	0	5	0
SAMPLE_10999	63	0	4	0
SAMPLE_11002	49	3	8	0
SAMPLE_11005	93	0	5	0
SAMPLE_11008	87	1	8	0
SAMPLE_11011	32	0	3	0
SAMPLE_11014	72	0	18	0
SAMPLE_11017	72	0	7	0
SAMPLE_1102	68	0	2	0
SAMPLE_11020	60	0	8	0
SAMPLE_11023	69	1	2	0
SAMPLE_11026	66	0	7	0
SAMPLE_11029	87	1	11	0
SAMPLE_11032	63	1	10	0
SAMPLE_11035	50	1	3	0
SAMPLE_11038	80	0	8	0
SAMPLE_11041	42	0	5	0
SAMPLE_11044	123	0	21	0
SAMPLE_11047	111	0	12	0
SAMPLE_1105	82	1	8	0
SAMPLE_11050	107	1	16	0
SAMPLE_11053	58	1	6	0
SAMPLE_11056	59	2	10	0
SAMPLE_11059	35	0	2	0
SAMPLE_11062	47	0	4	0
SAMPLE_11065	76	1	9	0
SAMPLE_11068	125	1	16	0
SAMPLE_11071	43	0	4	0
SAMPLE_11074	107	0	10	0
SAMPLE_11077	94	0	12	0
SAMPLE_1108	48	1	1	0
SAMPLE_11080	131	1	22	0
SAMPLE_11083	105	2	23	0
SAMPLE_11086	43	0	9	0
SAMPLE_11089	60	0	5	0
SAMPLE_11092	58	0	4	0
SAMPLE_11095	87	0	7	0
SAMPLE_11098	84	0	8	0
SAMPLE_11101	126	0	6	0
SAMPLE_11104	123	0	36	0
SAMPLE_11107	60	1	9	0
SAMPLE_1111	49	2	2	0
SAMPLE_11110	75	0	12	0
SAMPLE_11113	100	0	15	0
SAMPLE_11116	80	2	15	0
SAMPLE_11119	43	1	5	0
SAMPLE_11122	80	0	15	0
SAMPLE_11125	53	0	6	0
SAMPLE_11128	62	1	5	0
SAMPLE_11131	87	1	8	1
SAMPLE_11134	61	0	9	0
SAMPLE_11137	57	0	5	0
SAMPLE_1114	41	1	3	0
SAMPLE_11140	59	0	8	0
SAMPLE_11143	88	1	9	0
SAMPLE_11146	72	0	4	0
SAMPLE_11149	134	1	7	0
SAMPLE_11152	81	1	4	0
SAMPLE_11155	78	1	18	0
SAMPLE_11158	75	2	6	0
SAMPLE_11161	101	3	13	0
SAMPLE_11164	57	1	6	1
SAMPLE_11167	63	1	4	0
SAMPLE_1117	91	1	2	0
SAMPLE_11170	70	0	9	0
SAMPLE_11173	60	0	11	0
SAMPLE_11176	42	0	4	0
SAMPLE_11179	68	2	5	0
SAMPLE_11182	54	0	4	0
SAMPLE_11185	72	1	9	0
SAMPLE_11188	95	1	23	0
SAMPLE_11191	49	0	5	0
SAMPLE_11194	69	0	9	0
SAMPLE_11197	62	1	5	0
SAMPLE_112	57	2	0	0
SAMPLE_1120	124	0	20	0
SAMPLE_11200	70	0	5	0
SAMPLE_11203	62	0	8	0
SAMPLE_11206	52	1	5	0
SAMPLE_11209	54	0	4	0
SAMPLE_11212	78	0	9	0
SAMPLE_11215	53	0	3	0
SAMPLE_11218	54	0	6	0
SAMPLE_11221	36	0	5	0
SAMPLE_11224	66	1	3	0
SAMPLE_11227	53	0	6	0
SAMPLE_1123	82	1	4	0
SAMPLE_11230	90	1	11	0
SAMPLE_11233	72	0	3	0
SAMPLE_11236	68	0	7	0
SAMPLE_11239	79	1	3	0
SAMPLE_11242	63	0	8	0
SAMPLE_11245	52	1	7	0
SAMPLE_11248	55	2	10	0
SAMPLE_11251	64	0	12	0
SAMPLE_11254	68	0	1	0
SAMPLE_11257	56	0	6	0
SAMPLE_1126	60	1	6	0
SAMPLE_11260	55	1	7	0
SAMPLE_11263	47	0	7	0
SAMPLE_11266	64	0	1	0
SAMPLE_11269	65	0	6	0
SAMPLE_11272	87	0	4	0
SAMPLE_11275	158	0	51	0
SAMPLE_11278	49	0	7	0
SAMPLE_11281	89	0	16	0
SAMPLE_11284	78	1	9	0
SAMPLE_11287	72	0	6	0
SAMPLE_1129	62	1	8	0
SAMPLE_11290	151	1	42	0
SAMPLE_11293	46	0	4	0
SAMPLE_11296	75	1	4	0
SAMPLE_11299	60	0	7	0
SAMPLE_11302	51	1	4	0
SAMPLE_11305	67	4	5	1
SAMPLE_11308	49	1	6	0
SAMPLE_11311	38	1	3	0
SAMPLE_11314	64	2	13	0
SAMPLE_11317	78	1	9	0
SAMPLE_1132	72	2	4	0
SAMPLE_11320	68	1	11	1
SAMPLE_11323	85	1	6	0
SAMPLE_11326	52	0	5	0
SAMPLE_11329	67	2	11	0
SAMPLE_11332	41	0	4	0
SAMPLE_11335	53	1	6	0
SAMPLE_11338	105	0	10	0
SAMPLE_11341	48	0	2	0
SAMPLE_11344	44	1	5	0
SAMPLE_11347	43	1	4	0
SAMPLE_1135	55	0	2	0
SAMPLE_11350	41	0	5	0
SAMPLE_11353	51	0	5	0
SAMPLE_11356	67	0	9	0
SAMPLE_11359	52	0	6	0
SAMPLE_11362	74	1	5	0
SAMPLE_11365	57	1	8	0
SAMPLE_11368	67	1	6	0
SAMPLE_11371	45	1	5	0
SAMPLE_11374	57	0	4	0
SAMPLE_11377	68	1	16	0
SAMPLE_1138	56	1	9	0
SAMPLE_11380	66	0	7	0
SAMPLE_11383	65	0	5	0
SAMPLE_11386	49	1	7	0
SAMPLE_11389	62	1	5	0
SAMPLE_11392	57	1	4	0
SAMPLE_11395	65	0	5	0
SAMPLE_11398	55	0	11	0
SAMPLE_11401	74	2	7	0
SAMPLE_11404	52	0	8	0
SAMPLE_11407	77	1	1	0
SAMPLE_1141	95	0	7	0
SAMPLE_11410	62	0	8	0
SAMPLE_11413	70	0	5	0
SAMPLE_11416	46	0	5	0
SAMPLE_11419	81	0	17	0
SAMPLE_11422	66	1	15	0
SAMPLE_11425	80	1	3	0
SAMPLE_11428	46	1	0	0
SAMPLE_11431	50	0	3	0
SAMPLE_11434	62	1	9	0
SAMPLE_11437	61	1	8	0
SAMPLE_1144	49	2	3	0
SAMPLE_11440	109	3	29	0
SAMPLE_11443	60	1	4	0
SAMPLE_11446	48	0	2	0
SAMPLE_11449	55	2	4	0
SAMPLE_11452	57	0	7	0
SAMPLE_11455	86	1	8	0
SAMPLE_11458	67	1	7	0
SAMPLE_11461	53	1	4	0
SAMPLE_11464	58	0	8	0
SAMPLE_11467	47	1	5	0
SAMPLE_1147	54	1	2	1
SAMPLE_11470	67	0	9	0
SAMPLE_11473	56	0	4	0
SAMPLE_11476	58	0	6	0
SAMPLE_11479	45	1	4	0
SAMPLE_11482	56	2	5	0
SAMPLE_11485	38	0	4	0
SAMPLE_11488	54	0	9	0
SAMPLE_11491	64	1	4	0
SAMPLE_11494	52	0	12	0
SAMPLE_11497	40	1	2	0
SAMPLE_115	40	0	1	0
SAMPLE_1150	99	0	6	0
SAMPLE_11500	101	3	7	0
SAMPLE_11503	49	0	6	0
SAMPLE_11506	75	1	13	0
SAMPLE_11509	81	0	20	0
SAMPLE_11512	57	0	2	0
SAMPLE_11515	92	0	15	0
SAMPLE_11518	47	1	4	0
SAMPLE_11521	73	0	11	0
SAMPLE_11524	80	0	8	0
SAMPLE_11527	38	1	7	0
SAMPLE_1153	55	1	4	0
SAMPLE_11530	52	3	6	0
SAMPLE_11533	60	2	5	0
SAMPLE_11536	53	1	5	0
SAMPLE_11539	56	0	5	0
SAMPLE_11542	64	0	6	0
SAMPLE_11545	59	0	4	0
SAMPLE_11548	64	0	7	0
SAMPLE_11551	40	1	2	0
SAMPLE_11554	66	0	12	0
SAMPLE_11557	62	0	5	0
SAMPLE_1156	97	0	14	0
SAMPLE_11560	49	0	7	0
SAMPLE_11563	45	1	2	0
SAMPLE_11566	36	1	4	0
SAMPLE_11569	47	0	4	0
SAMPLE_11572	37	0	2	0
SAMPLE_11575	60	0	8	0
SAMPLE_11578	86	1	11	0
SAMPLE_11581	38	1	7	0
SAMPLE_11584	50	1	3	0
SAMPLE_11587	53	0	5	0
SAMPLE_1159	61	1	5	0
SAMPLE_11590	65	1	7	0
SAMPLE_11593	51	1	4	0
SAMPLE_11596	70	1	5	0
SAMPLE_11599	56	2	5	0
SAMPLE_11602	61	0	3	0
SAMPLE_11605	46	0	1	0
SAMPLE_11608	55	0	3	0
SAMPLE_11611	62	0	9	0
SAMPLE_11614	57	0	10	0
SAMPLE_11617	87	0	8	0
SAMPLE_1162	79	0	4	0
SAMPLE_11620	48	0	4	0
SAMPLE_11623	99	1	11	0
SAMPLE_11626	72	0	10	0
SAMPLE_11629	64	1	7	0
SAMPLE_11632	89	0	16	0
SAMPLE_11635	62	0	9	0
SAMPLE_11638	45	0	1	0
SAMPLE_11641	60	3	9	0
SAMPLE_11644	47	0	5	0
SAMPLE_11647	50	0	7	0
SAMPLE_1165	54	0	1	0
SAMPLE_11650	105	0	30	0
SAMPLE_11653	55	2	3	0
SAMPLE_11656	78	0	8	0
SAMPLE_11659	90	0	9	0
SAMPLE_11662	72	0	4	0
SAMPLE_11665	53	1	6	0
SAMPLE_11668	46	0	9	0
SAMPLE_11671	59	2	3	0
SAMPLE_11674	46	0	3	0
SAMPLE_11677	117	2	35	0
SAMPLE_1168	53	1	4	0
SAMPLE_11680	74	2	7	1
SAMPLE_11683	61	1	6	0
SAMPLE_11686	66	1	7	0
SAMPLE_11689	71	0	5	0
SAMPLE_11692	80	0	8	0
SAMPLE_11695	102	1	19	0
SAMPLE_11698	65	0	10	0
SAMPLE_11701	93	0	24	0
SAMPLE_11704	48	0	2	0
SAMPLE_11707	62	1	8	0
SAMPLE_1171	60	1	8	0
SAMPLE_11710	75	0	9	0
SAMPLE_11713	68	0	3	0
SAMPLE_11716	81	0	9	0
SAMPLE_11719	56	2	2	0
SAMPLE_11722	48	2	1	0
SAMPLE_11725	48	0	7	0
SAMPLE_11728	56	1	3	0
SAMPLE_11731	71	0	4	0
SAMPLE_11734	42	1	3	0
SAMPLE_11737	49	0	7	0
SAMPLE_1174	74	0	10	0
SAMPLE_11740	60	0	3	0
SAMPLE_11743	37	0	3	0
SAMPLE_11746	54	0	8	0
SAMPLE_11749	66	3	4	0
SAMPLE_11752	48	0	3	0
SAMPLE_11755	59	0	2	0
SAMPLE_11758	51	1	4	0
SAMPLE_11761	64	0	7	0
SAMPLE_11764	72	0	5	0
SAMPLE_11767	71	1	2	0
SAMPLE_1177	71	1	4	0
SAMPLE_11770	48	1	5	0
SAMPLE_11773	54	0	7	0
SAMPLE_11776	59	0	6	0
SAMPLE_11779	43	0	1	0
SAMPLE_11782	95	0	9	0
SAMPLE_11785	43	0	5	0
SAMPLE_11788	42	0	4	0
SAMPLE_11791	74	1	4	0
SAMPLE_11794	49	0	5	0
SAMPLE_11797	64	1	5	0
SAMPLE_118	78	0	5	0
SAMPLE_1180	56	1	6	0
SAMPLE_11800	76	0	11	0
SAMPLE_11803	55	1	2	0
SAMPLE_11806	63	0	7	0
SAMPLE_11809	59	0	4	0
SAMPLE_11812	50	1	2	0
SAMPLE_11815	58	0	5	0
SAMPLE_11818	60	1	5	0
SAMPLE_11821	67	0	7	0
SAMPLE_11824	65	2	4	0
SAMPLE_11827	78	1	7	0
SAMPLE_1183	95	0	2	0
SAMPLE_11830	91	1	30	0
SAMPLE_11833	100	0	12	0
SAMPLE_11836	78	1	14	1
SAMPLE_11839	81	0	5	0
SAMPLE_11842	62	1	8	0
SAMPLE_11845	65	0	7	0
SAMPLE_11848	63	1	4	0
SAMPLE_11851	50	0	8	0
SAMPLE_11854	51	1	3	0
SAMPLE_11857	86	0	19	0
SAMPLE_1186	74	0	1	0
SAMPLE_11860	76	0	8	0
SAMPLE_11863	72	1	4	0
SAMPLE_11866	66	1	5	0
SAMPLE_11869	38	1	2	0
SAMPLE_11872	68	0	8	0
SAMPLE_11875	43	0	1	0
SAMPLE_11878	71	1	12	0
SAMPLE_11881	69	1	9	0
SAMPLE_11884	42	0	2	0
SAMPLE_11887	78	2	4	1
SAMPLE_1189	30	1	3	0
SAMPLE_11890	47	2	7	0
SAMPLE_11893	38	1	7	0
SAMPLE_11896	71	1	13	0
SAMPLE_11899	45	1	5	0
SAMPLE_11902	48	3	0	0
SAMPLE_11905	65	0	11	0
SAMPLE_11908	44	2	2	0
SAMPLE_11911	66	1	7	0
SAMPLE_11914	44	2	6	1
SAMPLE_11917	64	1	4	0
SAMPLE_1192	54	0	0	0
SAMPLE_11920	65	1	5	0
SAMPLE_11923	52	1	3	0
SAMPLE_11926	53	0	3	0
SAMPLE_11929	66	0	2	0
SAMPLE_11932	60	0	3	0
SAMPLE_11935	72	0	7	0
SAMPLE_11938	68	0	10	0
SAMPLE_11941	63	0	4	0
SAMPLE_11944	69	2	4	0
SAMPLE_11947	57	0	3	0
SAMPLE_1195	90	1	3	0
SAMPLE_11950	22	1	2	0
SAMPLE_11953	61	2	9	0
SAMPLE_11956	75	1	8	0
SAMPLE_11959	71	0	19	0
SAMPLE_11962	94	0	14	0
SAMPLE_11965	59	3	5	0
SAMPLE_11968	81	2	2	0
SAMPLE_11971	74	1	8	0
SAMPLE_11974	46	1	7	0
SAMPLE_11977	51	0	4	0
SAMPLE_1198	89	2	9	0
SAMPLE_11980	96	1	8	0
SAMPLE_11983	54	0	4	0
SAMPLE_11986	71	0	8	0
SAMPLE_11989	53	0	3	0
SAMPLE_11992	63	0	4	0
SAMPLE_11995	44	0	9	0
SAMPLE_11998	66	1	4	0
SAMPLE_12001	51	0	6	0
SAMPLE_12004	42	0	2	0
SAMPLE_12007	55	0	0	0
SAMPLE_1201	60	1	2	0
SAMPLE_12010	71	0	4	0
SAMPLE_12013	64	1	3	1
SAMPLE_12016	83	0	20	0
SAMPLE_12019	49	0	3	0
SAMPLE_12022	65	0	8	0
SAMPLE_12025	66	1	22	0
SAMPLE_12028	55	2	4	1
SAMPLE_12031	84	0	9	0
SAMPLE_12034	71	0	11	0
SAMPLE_12037	117	0	40	0
SAMPLE_1204	56	2	3	0
SAMPLE_12040	47	2	4	0
SAMPLE_12043	36	1	2	0
SAMPLE_12046	83	0	5	0
SAMPLE_12049	102	0	2	0
SAMPLE_12052	178	1	72	0
SAMPLE_12055	84	0	6	0
SAMPLE_12058	55	0	4	0
SAMPLE_12061	68	0	7	0
SAMPLE_12064	51	1	4	0
SAMPLE_12067	51	1	3	0
SAMPLE_1207	61	0	1	0
SAMPLE_12070	57	0	2	0
SAMPLE_12073	70	2	5	0
SAMPLE_12076	50	0	8	0
SAMPLE_12079	67	2	4	0
SAMPLE_12082	41	1	5	0
SAMPLE_12085	65	0	11	0
SAMPLE_12088	54	2	4	0
SAMPLE_12091	60	0	5	0
SAMPLE_12094	68	1	16	0
SAMPLE_12097	48	1	8	0
SAMPLE_121	100	2	7	0
SAMPLE_1210	74	0	10	0
SAMPLE_12100	42	1	4	0
SAMPLE_12103	60	1	5	0
SAMPLE_12106	51	1	1	0
SAMPLE_12109	54	1	5	0
SAMPLE_12112	65	1	8	0
SAMPLE_12115	57	1	5	0
SAMPLE_12118	64	2	6	0
SAMPLE_12121	57	4	6	0
SAMPLE_12124	64	1	5	0
SAMPLE_12127	64	1	6	1
SAMPLE_1213	79	0	3	0
SAMPLE_12130	54	0	11	0
SAMPLE_12133	61	0	9	0
SAMPLE_12136	65	1	12	0
SAMPLE_12139	80	0	20	0
SAMPLE_12142	66	0	4	0
SAMPLE_12145	46	0	4	0
SAMPLE_12148	67	0	5	0
SAMPLE_12151	50	1	8	0
SAMPLE_12154	61	0	7	0
SAMPLE_12157	40	2	6	1
SAMPLE_1216	64	1	1	0
SAMPLE_12160	99	0	14	0
SAMPLE_12163	43	0	2	0
SAMPLE_12166	54	2	6	0
SAMPLE_12169	74	1	5	0
SAMPLE_12172	46	0	2	0
SAMPLE_12175	50	1	11	0
SAMPLE_12178	58	1	5	0
SAMPLE_12181	46	0	4	0
SAMPLE_12184	79	0	34	0
SAMPLE_12187	48	2	6	1
SAMPLE_1219	45	0	2	0
SAMPLE_12190	63	1	8	0
SAMPLE_12193	50	0	4	0
SAMPLE_12196	51	1	6	0
SAMPLE_12199	63	1	8	0
SAMPLE_12202	77	0	12	0
SAMPLE_12205	63	0	5	0
SAMPLE_12208	58	0	9	0
SAMPLE_12211	55	0	9	0
SAMPLE_12214	65	0	6	0
SAMPLE_12217	79	0	23	0
SAMPLE_1222	60	1	10	0
SAMPLE_12220	80	0	6	0
SAMPLE_12223	76	1	11	0
SAMPLE_12226	58	2	4	0
SAMPLE_12229	45	0	7	0
SAMPLE_12232	59	1	4	0
SAMPLE_12235	55	1	8	0
SAMPLE_12238	43	0	8	0
SAMPLE_12241	55	0	9	0
SAMPLE_12244	67	0	11	0
SAMPLE_12247	51	1	9	0
SAMPLE_1225	27	0	1	0
SAMPLE_12250	71	1	3	0
SAMPLE_12253	53	1	9	0
SAMPLE_12256	47	0	5	0
SAMPLE_12259	53	2	6	1
SAMPLE_12262	51	1	2	0
SAMPLE_12265	61	0	6	0
SAMPLE_12268	54	0	4	0
SAMPLE_12271	48	1	7	0
SAMPLE_12274	58	0	9	0
SAMPLE_12277	60	0	3	0
SAMPLE_1228	69	0	4	0
SAMPLE_12280	78	1	11	0
SAMPLE_12283	54	1	3	0
SAMPLE_12286	70	0	11	0
SAMPLE_12289	72	0	5	0
SAMPLE_12292	77	1	8	0
SAMPLE_12295	57	2	9	0
SAMPLE_12298	56	2	7	0
SAMPLE_12301	52	0	2	0
SAMPLE_12304	57	2	4	0
SAMPLE_12307	25	0	3	0
SAMPLE_1231	42	1	2	0
SAMPLE_12310	57	1	3	0
SAMPLE_12313	103	2	4	0
SAMPLE_12316	65	1	4	0
SAMPLE_12319	40	0	6	0
SAMPLE_12322	58	1	3	0
SAMPLE_12325	75	0	5	0
SAMPLE_12328	46	1	4	0
SAMPLE_12331	42	0	8	0
SAMPLE_12334	60	1	5	0
SAMPLE_12337	51	0	5	0
SAMPLE_1234	65	0	2	0
SAMPLE_12340	56	0	7	0
SAMPLE_12343	77	1	19	0
SAMPLE_12346	70	1	3	0
SAMPLE_12349	102	0	17	0
SAMPLE_12352	58	1	15	0
SAMPLE_12355	83	1	4	0
SAMPLE_12358	89	2	3	0
SAMPLE_12361	68	1	16	0
SAMPLE_12364	64	0	7	0
SAMPLE_12367	72	1	6	0
SAMPLE_1237	47	0	5	0
SAMPLE_12370	84	0	6	0
SAMPLE_12373	62	0	3	0
SAMPLE_12376	53	1	6	0
SAMPLE_12379	61	0	7	0
SAMPLE_12382	54	0	6	0
SAMPLE_12385	63	2	7	0
SAMPLE_12388	66	0	7	0
SAMPLE_12391	81	0	19	0
SAMPLE_12394	51	0	5	0
SAMPLE_12397	106	0	8	0
SAMPLE_124	44	0	1	0
SAMPLE_1240	45	0	3	0
SAMPLE_12400	80	1	10	1
SAMPLE_12403	57	0	2	0
SAMPLE_12406	68	1	2	0
SAMPLE_12409	82	2	6	0
SAMPLE_12412	46	1	6	0
SAMPLE_12415	41	0	4	0
SAMPLE_12418	79	0	6	0
SAMPLE_12421	32	0	3	0
SAMPLE_12424	58	0	7	0
SAMPLE_12427	61	1	6	0
SAMPLE_1243	73	1	2	1
SAMPLE_12430	58	0	6	0
SAMPLE_12433	71	0	9	0
SAMPLE_12436	58	0	4	0
SAMPLE_12439	58	1	5	0
SAMPLE_12442	85	1	17	0
SAMPLE_12445	84	3	6	1
SAMPLE_12448	68	2	6	0
SAMPLE_12451	49	1	2	0
SAMPLE_12454	109	0	36	0
SAMPLE_12457	43	2	3	0
SAMPLE_1246	50	1	1	0
SAMPLE_12460	104	1	27	0
SAMPLE_12463	66	1	6	0
SAMPLE_12466	92	0	12	0
SAMPLE_12469	100	2	14	1
SAMPLE_12472	43	0	4	0
SAMPLE_12475	87	0	5	0
SAMPLE_12478	57	0	4	0
SAMPLE_12481	44	1	8	0
SAMPLE_12484	58	1	5	0
SAMPLE_12487	86	0	12	0
SAMPLE_1249	67	1	6	0
SAMPLE_12490	47	0	2	0
SAMPLE_12493	79	1	7	1
SAMPLE_12496	48	1	5	0
SAMPLE_12499	74	0	7	0
SAMPLE_12502	65	1	2	0
SAMPLE_12505	93	0	8	0
SAMPLE_12508	52	0	8	0
SAMPLE_12511	54	2	8	0
SAMPLE_12514	38	1	2	0
SAMPLE_12517	57	3	3	0
SAMPLE_1252	95	1	3	0
SAMPLE_12520	47	0	6	0
SAMPLE_12523	67	0	4	0
SAMPLE_12526	45	0	5	0
SAMPLE_12529	85	0	21	0
SAMPLE_12532	70	0	9	0
SAMPLE_12535	43	0	7	0
SAMPLE_12538	50	1	2	0
SAMPLE_12541	48	0	6	0
SAMPLE_12544	51	1	10	0
SAMPLE_12547	74	1	9	0
SAMPLE_1255	66	1	2	0
SAMPLE_12550	66	0	4	0
SAMPLE_12553	65	0	4	0
SAMPLE_12556	59	2	5	1
SAMPLE_12559	63	0	4	0
SAMPLE_12562	68	1	10	0
SAMPLE_12565	74	1	15	0
SAMPLE_12568	73	1	4	0
SAMPLE_12571	46	1	7	0
SAMPLE_12574	81	1	13	0
SAMPLE_12577	51	0	1	0
SAMPLE_1258	68	1	5	0
SAMPLE_12580	60	0	4	0
SAMPLE_12583	51	1	7	0
SAMPLE_12586	68	3	10	0
SAMPLE_12589	64	0	3	0
SAMPLE_12592	76	0	2	0
SAMPLE_12595	74	2	9	0
SAMPLE_12598	53	0	0	0
SAMPLE_12601	62	2	5	0
SAMPLE_12604	45	0	4	0
SAMPLE_12607	44	1	4	0
SAMPLE_1261	116	1	7	0
SAMPLE_12610	44	0	3	0
SAMPLE_12613	68	0	7	0
SAMPLE_12616	66	1	5	0
SAMPLE_12619	61	0	1	0
SAMPLE_12622	56	0	6	0
SAMPLE_12625	66	1	2	0
SAMPLE_12628	88	0	13	0
SAMPLE_12631	57	1	8	0
SAMPLE_12634	49	0	4	0
SAMPLE_12637	57	0	7	0
SAMPLE_1264	61	0	2	0
SAMPLE_12640	61	0	5	0
SAMPLE_12643	59	2	12	0
SAMPLE_12646	75	0	14	0
SAMPLE_12649	70	1	5	0
SAMPLE_12652	49	1	6	1
SAMPLE_12655	56	0	6	0
SAMPLE_12658	55	3	1	0
SAMPLE_12661	44	0	4	0
SAMPLE_12664	71	0	6	0
SAMPLE_12667	71	0	6	0
SAMPLE_1267	41	0	2	0
SAMPLE_12670	54	1	8	1
SAMPLE_12673	75	0	6	0
SAMPLE_12676	62	1	4	0
SAMPLE_12679	60	0	2	0
SAMPLE_12682	58	1	6	0
SAMPLE_12685	91	2	20	0
SAMPLE_12688	72	2	19	0
SAMPLE_12691	60	0	8	0
SAMPLE_12694	62	0	12	0
SAMPLE_12697	72	0	18	0
SAMPLE_127	31	1	3	0
SAMPLE_1270	109	0	4	0
SAMPLE_12700	67	2	7	0
SAMPLE_12703	51	0	9	0
SAMPLE_12706	47	1	3	0
SAMPLE_12709	53	0	3	0
SAMPLE_12712	66	2	12	0
SAMPLE_12715	53	0	3	0
SAMPLE_12718	66	0	13	0
SAMPLE_12721	55	0	5	0
SAMPLE_12724	79	0	7	0
SAMPLE_12727	87	0	5	0
SAMPLE_1273	50	0	3	0
SAMPLE_12730	55	0	4	0
SAMPLE_12733	49	0	3	0
SAMPLE_12736	43	0	5	0
SAMPLE_12739	88	0	14	0
SAMPLE_12742	76	1	8	0
SAMPLE_12745	52	0	7	0
SAMPLE_12748	56	0	4	0
SAMPLE_12751	80	0	26	0
SAMPLE_12754	62	1	9	0
SAMPLE_12757	71	1	11	0
SAMPLE_1276	83	0	7	0
SAMPLE_12760	48	0	2	0
SAMPLE_12763	40	0	2	0
SAMPLE_12766	58	0	7	0
SAMPLE_12769	49	1	2	0
SAMPLE_12772	55	0	2	0
SAMPLE_12775	66	0	3	0
SAMPLE_12778	87	0	21	0
SAMPLE_12781	47	1	5	0
SAMPLE_12784	63	0	4	0
SAMPLE_12787	60	0	2	0
SAMPLE_1279	56	0	14	0
SAMPLE_12790	50	0	6	0
SAMPLE_12793	94	1	22	1
SAMPLE_12796	61	1	1	0
SAMPLE_12799	92	1	14	0
SAMPLE_12802	68	0	4	0
SAMPLE_12805	61	0	8	0
SAMPLE_12808	48	2	3	0
SAMPLE_12811	49	1	5	0
SAMPLE_12814	54	0	12	0
SAMPLE_12817	66	0	5	0
SAMPLE_1282	60	0	3	0
SAMPLE_12820	40	3	6	0
SAMPLE_12823	89	0	26	0
SAMPLE_12826	55	0	10	0
SAMPLE_12829	58	0	8	0
SAMPLE_12832	94	1	9	0
SAMPLE_12835	67	0	5	0
SAMPLE_12838	65	0	6	0
SAMPLE_12841	49	1	2	0
SAMPLE_12844	54	0	8	0
SAMPLE_12847	59	0	11	0
SAMPLE_1285	85	3	10	0
SAMPLE_12850	73	0	16	0
SAMPLE_12853	91	2	11	2
SAMPLE_12856	80	2	9	0
SAMPLE_12859	67	0	7	0
SAMPLE_12862	50	0	4	0
SAMPLE_12865	51	1	4	0
SAMPLE_12868	70	1	12	0
SAMPLE_12871	56	1	12	0
SAMPLE_12874	68	4	13	0
SAMPLE_12877	41	0	6	0
SAMPLE_1288	61	1	4	0
SAMPLE_12880	75	0	16	0
SAMPLE_12883	65	0	13	0
SAMPLE_12886	79	2	6	0
SAMPLE_12889	79	0	4	0
SAMPLE_12892	56	2	4	0
SAMPLE_12895	65	1	3	0
SAMPLE_12898	59	0	12	0
SAMPLE_12901	82	1	8	0
SAMPLE_12904	82	1	10	0
SAMPLE_12907	70	1	16	0
SAMPLE_1291	46	0	9	0
SAMPLE_12910	64	0	4	0
SAMPLE_12913	76	0	18	0
SAMPLE_12916	82	1	7	0
SAMPLE_12919	97	1	13	0
SAMPLE_12922	49	2	3	1
SAMPLE_12925	71	0	4	0
SAMPLE_12928	45	0	1	0
SAMPLE_12931	66	0	2	0
SAMPLE_12934	48	0	2	0
SAMPLE_12937	64	0	13	0
SAMPLE_1294	56	0	4	0
SAMPLE_12940	50	1	5	0
SAMPLE_12943	51	1	2	0
SAMPLE_12946	60	0	3	0
SAMPLE_12949	59	0	9	0
SAMPLE_12952	56	1	4	0
SAMPLE_12955	75	0	11	0
SAMPLE_12958	55	0	6	0
SAMPLE_12961	54	1	5	0
SAMPLE_12964	66	1	6	0
SAMPLE_12967	49	0	10	0
SAMPLE_1297	64	0	2	0
SAMPLE_12970	86	2	10	1
SAMPLE_12973	41	1	2	0
SAMPLE_12976	45	1	5	0
SAMPLE_12979	87	1	5	0
SAMPLE_12982	62	1	3	0
SAMPLE_12985	65	0	7	0
SAMPLE_12988	71	1	6	0
SAMPLE_12991	69	0	10	0
SAMPLE_12994	83	0	5	0
SAMPLE_12997	78	0	12	0
SAMPLE_13	60	1	6	0
SAMPLE_130	63	0	5	0
SAMPLE_1300	55	1	1	0
SAMPLE_13000	51	0	7	0
SAMPLE_13003	64	0	8	0
SAMPLE_13006	74	0	21	0
SAMPLE_13009	52	1	4	0
SAMPLE_13012	60	1	6	0
SAMPLE_13015	34	1	2	0
SAMPLE_13018	68	0	5	0
SAMPLE_13021	56	0	6	0
SAMPLE_13024	61	1	2	0
SAMPLE_13027	61	1	5	0
SAMPLE_1303	71	2	6	0
SAMPLE_13030	67	1	5	0
SAMPLE_13033	49	0	4	0
SAMPLE_13036	67	0	10	0
SAMPLE_13039	66	0	9	0
SAMPLE_13042	144	0	43	0
SAMPLE_13045	73	0	8	0
SAMPLE_13048	61	2	2	0
SAMPLE_13051	76	1	7	0
SAMPLE_13054	87	1	6	0
SAMPLE_13057	56	0	3	0
SAMPLE_1306	85	1	3	0
SAMPLE_13060	65	0	1	0
SAMPLE_13063	78	1	6	0
SAMPLE_13066	65	1	8	0
SAMPLE_13069	53	0	2	0
SAMPLE_13072	71	0	15	0
SAMPLE_13075	82	0	10	0
SAMPLE_13078	65	0	8	0
SAMPLE_13081	57	0	5	0
SAMPLE_13084	108	1	23	0
SAMPLE_13087	83	0	7	0
SAMPLE_1309	63	0	3	0
SAMPLE_13090	77	0	20	0
SAMPLE_13093	72	0	8	0
SAMPLE_13096	58	0	8	0
SAMPLE_13099	55	1	6	0
SAMPLE_13102	106	1	22	0
SAMPLE_13105	84	2	8	1
SAMPLE_13108	69	0	4	0
SAMPLE_13111	52	0	4	0
SAMPLE_13114	73	0	6	0
SAMPLE_13117	101	1	10	0
SAMPLE_1312	64	1	2	0
SAMPLE_13120	65	1	7	0
SAMPLE_13123	63	0	5	0
SAMPLE_13126	67	1	7	0
SAMPLE_13129	109	0	11	0
SAMPLE_13132	52	0	5	0
SAMPLE_13135	58	0	6	0
SAMPLE_13138	67	1	11	0
SAMPLE_13141	154	0	34	0
SAMPLE_13144	57	1	2	0
SAMPLE_13147	61	1	5	0
SAMPLE_1315	55	0	0	0
SAMPLE_13150	75	0	9	0
SAMPLE_13153	112	0	8	0
SAMPLE_13156	143	0	20	0
SAMPLE_13159	69	0	10	0
SAMPLE_13162	86	0	7	0
SAMPLE_13165	57	1	6	0
SAMPLE_13168	78	1	8	0
SAMPLE_13171	64	2	6	0
SAMPLE_13174	83	0	17	0
SAMPLE_13177	64	1	12	0
SAMPLE_1318	32	5	3	1
SAMPLE_13180	72	0	3	0
SAMPLE_13183	63	1	7	0
SAMPLE_13186	62	1	11	0
SAMPLE_13189	66	1	6	1
SAMPLE_13192	61	2	4	0
SAMPLE_13195	55	1	6	0
SAMPLE_13198	50	3	5	0
SAMPLE_13201	46	0	4	0
SAMPLE_13204	67	0	4	0
SAMPLE_13207	89	1	18	1
SAMPLE_1321	78	1	8	0
SAMPLE_13210	72	1	9	0
SAMPLE_13213	55	0	3	0
SAMPLE_13216	90	0	14	0
SAMPLE_13219	71	0	5	0
SAMPLE_13222	65	1	6	0
SAMPLE_13225	69	0	8	0
SAMPLE_13228	53	1	9	1
SAMPLE_13231	68	2	5	1
SAMPLE_13234	72	0	5	0
SAMPLE_13237	59	1	3	0
SAMPLE_1324	43	1	9	0
SAMPLE_13240	107	1	12	0
SAMPLE_13243	60	0	4	0
SAMPLE_13246	68	0	6	0
SAMPLE_13249	87	1	7	0
SAMPLE_13252	51	0	5	0
SAMPLE_13255	51	0	4	0
SAMPLE_13258	82	0	6	0
SAMPLE_13261	55	0	8	0
SAMPLE_13264	55	0	6	0
SAMPLE_13267	81	0	5	0
SAMPLE_1327	85	0	11	0
SAMPLE_13270	82	0	16	0
SAMPLE_13273	61	1	6	0
SAMPLE_13276	59	0	3	0
SAMPLE_13279	74	0	10	0
SAMPLE_13282	66	0	6	0
SAMPLE_13285	53	0	7	0
SAMPLE_13288	66	2	10	0
SAMPLE_13291	89	0	17	0
SAMPLE_13294	72	2	6	0
SAMPLE_13297	77	0	19	0
SAMPLE_133	105	0	10	0
SAMPLE_1330	76	0	4	0
SAMPLE_13300	60	0	9	0
SAMPLE_13303	76	0	13	0
SAMPLE_13306	80	1	16	0
SAMPLE_13309	71	0	5	0
SAMPLE_13312	73	0	7	0
SAMPLE_13315	63	1	4	0
SAMPLE_13318	81	0	19	0
SAMPLE_13321	52	1	12	1
SAMPLE_13324	35	0	2	0
SAMPLE_13327	68	1	4	0
SAMPLE_1333	47	0	2	0
SAMPLE_13330	65	1	8	0
SAMPLE_13333	58	1	5	0
SAMPLE_13336	87	1	12	0
SAMPLE_13339	59	1	4	0
SAMPLE_13342	70	0	5	0
SAMPLE_13345	69	1	6	0
SAMPLE_13348	48	1	4	0
SAMPLE_13351	55	0	5	0
SAMPLE_13354	84	2	16	0
SAMPLE_13357	61	1	8	0
SAMPLE_1336	84	0	19	0
SAMPLE_13360	92	0	18	0
SAMPLE_13363	83	1	5	0
SAMPLE_13366	81	1	6	0
SAMPLE_13369	124	2	52	0
SAMPLE_13372	71	1	6	0
SAMPLE_13375	73	0	12	0
SAMPLE_13378	53	0	2	0
SAMPLE_13381	53	1	8	0
SAMPLE_13384	70	1	4	0
SAMPLE_13387	57	0	4	0
SAMPLE_1339	73	0	9	0
SAMPLE_13390	102	0	31	0
SAMPLE_13393	64	1	7	0
SAMPLE_13396	59	1	7	0
SAMPLE_13399	47	0	4	0
SAMPLE_13402	66	1	7	0
SAMPLE_13405	68	0	6	0
SAMPLE_13408	47	0	2	0
SAMPLE_13411	80	2	8	0
SAMPLE_13414	68	0	6	0
SAMPLE_13417	81	1	8	0
SAMPLE_1342	90	1	14	0
SAMPLE_13420	84	1	5	0
SAMPLE_13423	56	0	7	0
SAMPLE_13426	89	0	6	0
SAMPLE_13429	48	0	4	0
SAMPLE_13432	82	3	5	0
SAMPLE_13435	104	0	15	0
SAMPLE_13438	55	0	1	0
SAMPLE_13441	69	0	6	0
SAMPLE_13444	79	0	4	0
SAMPLE_13447	68	1	5	0
SAMPLE_1345	78	1	6	1
SAMPLE_13450	88	1	17	0
SAMPLE_13453	106	0	27	0
SAMPLE_13456	67	0	4	0
SAMPLE_13459	60	0	8	0
SAMPLE_13462	58	0	8	0
SAMPLE_13465	67	0	6	0
SAMPLE_13468	48	0	0	0
SAMPLE_13471	56	2	1	0
SAMPLE_13474	84	1	12	0
SAMPLE_13477	93	1	8	0
SAMPLE_1348	71	0	9	0
SAMPLE_13480	63	0	5	0
SAMPLE_13483	67	0	9	0
SAMPLE_13486	51	0	3	0
SAMPLE_13489	68	0	13	0
SAMPLE_13492	68	0	9	0
SAMPLE_13495	80	1	14	0
SAMPLE_13498	46	0	3	0
SAMPLE_13501	71	0	10	0
SAMPLE_13504	89	1	16	0
SAMPLE_13507	62	0	11	0
SAMPLE_1351	64	1	5	0
SAMPLE_13510	37	1	4	0
SAMPLE_13513	60	1	7	0
SAMPLE_13516	68	0	7	0
SAMPLE_13519	77	0	6	0
SAMPLE_13522	93	0	24	0
SAMPLE_13525	67	0	6	0
SAMPLE_13528	71	1	7	0
SAMPLE_13531	77	0	13	0
SAMPLE_13534	77	0	6	0
SAMPLE_13537	72	0	6	0
SAMPLE_1354	74	2	1	0
SAMPLE_13540	51	0	13	0
SAMPLE_13543	56	0	4	0
SAMPLE_13546	58	1	12	0
SAMPLE_13549	94	0	14	0
SAMPLE_13552	45	0	5	0
SAMPLE_13555	54	0	8	0
SAMPLE_13558	67	0	9	0
SAMPLE_13561	74	2	5	0
SAMPLE_13564	51	0	5	0
SAMPLE_13567	66	0	6	0
SAMPLE_1357	58	0	3	0
SAMPLE_13570	76	2	3	0
SAMPLE_13573	89	1	8	0
SAMPLE_13576	66	1	10	1
SAMPLE_13579	46	0	6	0
SAMPLE_13582	82	1	9	0
SAMPLE_13585	77	2	3	0
SAMPLE_13588	66	1	8	0
SAMPLE_13591	47	0	2	0
SAMPLE_13594	69	0	8	0
SAMPLE_13597	73	0	10	0
SAMPLE_136	74	0	3	0
SAMPLE_1360	56	0	3	0
SAMPLE_13600	67	0	5	0
SAMPLE_13603	56	1	2	0
SAMPLE_13606	79	0	8	0
SAMPLE_13609	66	0	10	0
SAMPLE_13612	48	0	2	0
SAMPLE_13615	65	1	6	0
SAMPLE_13618	85	1	22	0
SAMPLE_13621	61	1	6	0
SAMPLE_13624	57	0	5	0
SAMPLE_13627	63	0	7	0
SAMPLE_1363	62	0	8	0
SAMPLE_13630	67	1	6	0
SAMPLE_13633	56	1	3	0
SAMPLE_13636	56	0	4	0
SAMPLE_13639	14	0	3	0
SAMPLE_13642	74	1	15	1
SAMPLE_13645	48	0	6	0
SAMPLE_13648	49	1	1	0
SAMPLE_13651	70	0	6	0
SAMPLE_13654	62	1	12	0
SAMPLE_13657	75	2	7	0
SAMPLE_1366	55	1	1	0
SAMPLE_13660	70	0	5	0
SAMPLE_13663	57	1	9	0
SAMPLE_13666	60	2	9	1
SAMPLE_13669	104	1	16	0
SAMPLE_13672	77	0	12	0
SAMPLE_13675	55	0	3	0
SAMPLE_13678	61	0	13	0
SAMPLE_13681	64	0	7	0
SAMPLE_13684	51	1	11	0
SAMPLE_13687	45	1	1	0
SAMPLE_1369	72	1	0	0
SAMPLE_13690	70	0	3	0
SAMPLE_13693	51	0	3	0
SAMPLE_13696	49	0	8	0
SAMPLE_13699	81	0	7	0
SAMPLE_13702	52	0	6	0
SAMPLE_13705	49	3	8	0
SAMPLE_13708	50	0	7	0
SAMPLE_13711	89	1	12	0
SAMPLE_13714	54	0	8	0
SAMPLE_13717	85	1	3	1
SAMPLE_1372	95	1	6	0
SAMPLE_13720	52	0	8	0
SAMPLE_13723	81	1	9	0
SAMPLE_13726	42	2	4	0
SAMPLE_13729	42	1	2	0
SAMPLE_13732	41	0	4	0
SAMPLE_13735	44	0	5	0
SAMPLE_13738	51	0	4	0
SAMPLE_13741	52	1	4	1
SAMPLE_13744	52	0	4	0
SAMPLE_13747	62	0	4	0
SAMPLE_1375	64	0	1	0
SAMPLE_13750	74	1	4	0
SAMPLE_13753	54	0	7	0
SAMPLE_13756	54	1	3	0
SAMPLE_13759	57	0	5	0
SAMPLE_13762	56	0	4	0
SAMPLE_13765	65	0	10	0
SAMPLE_13768	82	1	11	0
SAMPLE_13771	62	0	5	0
SAMPLE_13774	59	0	3	0
SAMPLE_13777	71	0	12	0
SAMPLE_1378	78	1	10	0
SAMPLE_13780	60	1	7	0
SAMPLE_13783	51	0	11	0
SAMPLE_13786	82	2	7	0
SAMPLE_13789	76	1	3	0
SAMPLE_13792	51	1	7	0
SAMPLE_13795	38	1	2	0
SAMPLE_13798	84	0	17	0
SAMPLE_13801	72	0	6	0
SAMPLE_13804	52	0	2	0
SAMPLE_13807	70	0	5	0
SAMPLE_1381	70	0	2	0
SAMPLE_13810	66	2	14	1
SAMPLE_13813	69	0	11	0
SAMPLE_13816	59	0	12	0
SAMPLE_13819	78	1	23	0
SAMPLE_13822	74	0	11	0
SAMPLE_13825	62	1	5	0
SAMPLE_13828	65	1	7	0
SAMPLE_13831	104	0	22	0
SAMPLE_13834	57	0	6	0
SAMPLE_13837	46	0	1	0
SAMPLE_1384	80	0	4	0
SAMPLE_13840	77	0	6	0
SAMPLE_13843	53	0	2	0
SAMPLE_13846	57	0	12	0
SAMPLE_13849	58	0	5	0
SAMPLE_13852	69	0	6	0
SAMPLE_13855	83	0	16	0
SAMPLE_13858	65	0	12	0
SAMPLE_13861	86	1	23	0
SAMPLE_13864	62	0	10	0
SAMPLE_13867	72	0	2	0
SAMPLE_1387	59	0	5	0
SAMPLE_13870	108	2	7	0
SAMPLE_13873	71	0	5	0
SAMPLE_13876	68	2	3	0
SAMPLE_13879	57	0	12	0
SAMPLE_13882	59	1	3	0
SAMPLE_13885	69	0	6	0
SAMPLE_13888	53	0	13	0
SAMPLE_13891	76	1	13	1
SAMPLE_13894	41	1	5	0
SAMPLE_13897	81	0	10	0
SAMPLE_139	95	0	11	0
SAMPLE_1390	57	1	5	0
SAMPLE_13900	52	0	7	0
SAMPLE_13903	85	1	12	0
SAMPLE_13906	65	0	5	0
SAMPLE_13909	97	1	3	0
SAMPLE_13912	74	1	8	0
SAMPLE_13915	78	2	6	0
SAMPLE_13918	62	1	4	0
SAMPLE_13921	63	0	7	0
SAMPLE_13924	66	0	4	0
SAMPLE_13927	69	0	5	0
SAMPLE_1393	51	0	0	0
SAMPLE_13930	68	2	3	0
SAMPLE_13933	67	1	9	0
SAMPLE_13936	77	0	11	0
SAMPLE_13939	132	0	50	0
SAMPLE_13942	49	1	5	0
SAMPLE_13945	69	1	6	0
SAMPLE_13948	66	0	3	0
SAMPLE_13951	55	0	5	0
SAMPLE_13954	83	0	10	0
SAMPLE_13957	97	1	31	0
SAMPLE_1396	57	0	4	0
SAMPLE_13960	55	3	10	1
SAMPLE_13963	75	2	10	0
SAMPLE_13966	89	0	4	0
SAMPLE_13969	54	1	2	0
SAMPLE_13972	87	2	5	0
SAMPLE_13975	77	0	4	0
SAMPLE_13978	65	0	5	0
SAMPLE_13981	73	1	21	1
SAMPLE_13984	56	0	5	0
SAMPLE_13987	73	0	9	0
SAMPLE_1399	44	0	2	0
SAMPLE_13990	83	0	4	0
SAMPLE_13993	74	1	13	0
SAMPLE_13996	71	0	6	0
SAMPLE_13999	56	0	1	0
SAMPLE_14002	59	0	7	0
SAMPLE_14005	62	1	2	0
SAMPLE_14008	63	1	9	0
SAMPLE_14011	63	0	3	0
SAMPLE_14014	70	2	8	1
SAMPLE_14017	75	0	9	0
SAMPLE_1402	123	0	1	0
SAMPLE_14020	53	2	3	0
SAMPLE_14023	68	0	8	0
SAMPLE_14026	64	1	3	0
SAMPLE_14029	70	0	9	0
SAMPLE_14032	60	0	6	0
SAMPLE_14035	77	0	3	0
SAMPLE_14038	46	1	8	0
SAMPLE_14041	70	1	9	1
SAMPLE_14044	47	0	5	0
SAMPLE_14047	70	0	9	0
SAMPLE_1405	111	1	10	0
SAMPLE_14050	77	1	13	0
SAMPLE_14053	63	0	3	0
SAMPLE_14056	62	0	4	0
SAMPLE_14059	62	0	1	0
SAMPLE_14062	93	2	12	0
SAMPLE_14065	72	0	19	0
SAMPLE_14068	47	1	9	0
SAMPLE_14071	56	0	6	0
SAMPLE_14074	123	0	38	0
SAMPLE_14077	78	0	18	0
SAMPLE_1408	50	1	3	0
SAMPLE_14080	62	0	9	0
SAMPLE_14083	78	1	16	0
SAMPLE_14086	68	0	7	0
SAMPLE_14089	70	0	7	0
SAMPLE_14092	49	1	4	1
SAMPLE_14095	79	0	10	0
SAMPLE_14098	96	0	14	0
SAMPLE_14101	72	0	7	0
SAMPLE_14104	88	0	6	0
SAMPLE_14107	44	0	7	0
SAMPLE_1411	99	0	8	0
SAMPLE_14110	50	1	10	0
SAMPLE_14113	98	1	7	0
SAMPLE_14116	71	2	13	0
SAMPLE_14119	81	1	12	0
SAMPLE_14122	66	0	3	0
SAMPLE_14125	62	0	10	0
SAMPLE_14128	60	1	10	0
SAMPLE_14131	80	0	5	0
SAMPLE_14134	85	1	4	0
SAMPLE_14137	76	1	6	0
SAMPLE_1414	97	1	5	0
SAMPLE_14140	62	0	5	0
SAMPLE_14143	65	1	4	0
SAMPLE_14146	57	0	4	0
SAMPLE_14149	75	0	7	0
SAMPLE_14152	89	0	10	0
SAMPLE_14155	53	1	6	1
SAMPLE_14158	52	0	6	0
SAMPLE_14161	43	0	6	0
SAMPLE_14164	58	0	7	0
SAMPLE_14167	66	0	6	0
SAMPLE_1417	78	0	11	0
SAMPLE_14170	68	0	10	0
SAMPLE_14173	55	1	4	0
SAMPLE_14176	99	0	8	0
SAMPLE_14179	64	14	8	2
SAMPLE_14182	62	1	4	0
SAMPLE_14185	87	0	10	0
SAMPLE_14188	93	1	11	0
SAMPLE_14191	77	0	10	0
SAMPLE_14194	59	2	4	1
SAMPLE_14197	63	0	9	0
SAMPLE_142	62	1	3	1
SAMPLE_1420	73	0	3	0
SAMPLE_14200	89	0	9	0
SAMPLE_14203	75	1	11	0
SAMPLE_14206	63	0	1	0
SAMPLE_14209	73	14	7	3
SAMPLE_14212	48	0	7	0
SAMPLE_14215	47	0	2	0
SAMPLE_14218	81	0	2	0
SAMPLE_14221	67	0	8	0
SAMPLE_14224	105	1	18	0
SAMPLE_14227	59	0	4	0
SAMPLE_1423	125	0	8	0
SAMPLE_14230	57	1	4	0
SAMPLE_14233	52	0	5	0
SAMPLE_14236	86	0	10	0
SAMPLE_14239	52	0	3	0
SAMPLE_14242	66	0	5	0
SAMPLE_14245	75	1	10	0
SAMPLE_14248	53	1	6	0
SAMPLE_14251	85	1	6	0
SAMPLE_14254	91	0	4	0
SAMPLE_14257	109	1	35	0
SAMPLE_1426	43	0	2	0
SAMPLE_14260	72	0	3	0
SAMPLE_14263	45	0	8	0
SAMPLE_14266	55	0	6	0
SAMPLE_14269	92	0	10	0
SAMPLE_14272	82	1	13	0
SAMPLE_14275	77	0	6	0
SAMPLE_14278	161	0	61	0
SAMPLE_14281	83	1	8	0
SAMPLE_14284	73	1	12	0
SAMPLE_14287	64	0	7	0
SAMPLE_1429	76	2	7	0
SAMPLE_14290	77	0	10	0
SAMPLE_14293	82	0	19	0
SAMPLE_14296	55	0	4	0
SAMPLE_14299	54	1	4	0
SAMPLE_14302	57	0	8	0
SAMPLE_14305	46	0	2	0
SAMPLE_14308	60	0	10	0
SAMPLE_14311	58	1	2	0
SAMPLE_14314	62	0	3	0
SAMPLE_14317	60	0	6	0
SAMPLE_1432	63	1	4	0
SAMPLE_14320	55	0	3	0
SAMPLE_14323	55	1	6	0
SAMPLE_14326	56	0	2	0
SAMPLE_14329	48	0	2	0
SAMPLE_14332	69	0	10	0
SAMPLE_14335	52	1	3	0
SAMPLE_14338	89	0	11	0
SAMPLE_14341	78	1	10	0
SAMPLE_14344	70	2	8	0
SAMPLE_14347	80	0	8	0
SAMPLE_1435	61	1	13	0
SAMPLE_14350	80	0	5	0
SAMPLE_14353	60	1	1	0
SAMPLE_14356	55	0	3	0
SAMPLE_14359	61	0	7	0
SAMPLE_14362	66	0	7	0
SAMPLE_14365	56	0	2	0
SAMPLE_14368	73	0	7	0
SAMPLE_14371	89	1	11	0
SAMPLE_14374	85	1	10	0
SAMPLE_14377	58	1	4	0
SAMPLE_1438	102	1	22	1
SAMPLE_14380	64	0	7	0
SAMPLE_14383	59	0	2	0
SAMPLE_14386	53	1	5	0
SAMPLE_14389	64	0	6	0
SAMPLE_14392	67	1	6	0
SAMPLE_14395	83	0	9	0
SAMPLE_14398	55	3	1	0
SAMPLE_14401	58	0	7	0
SAMPLE_14404	69	0	12	0
SAMPLE_14407	74	0	10	0
SAMPLE_1441	104	1	6	0
SAMPLE_14410	57	1	1	0
SAMPLE_14413	76	0	5	0
SAMPLE_14416	43	1	10	0
SAMPLE_14419	70	1	13	0
SAMPLE_14422	61	0	5	0
SAMPLE_14425	76	1	12	0
SAMPLE_14428	88	0	6	0
SAMPLE_14431	86	0	7	0
SAMPLE_14434	68	0	3	0
SAMPLE_14437	96	1	6	0
SAMPLE_1444	95	1	7	0
SAMPLE_14440	64	1	5	0
SAMPLE_14443	97	1	19	0
SAMPLE_14446	64	1	5	0
SAMPLE_14449	54	0	3	0
SAMPLE_14452	67	0	9	0
SAMPLE_14455	59	1	3	0
SAMPLE_14458	67	1	6	0
SAMPLE_14461	69	1	10	0
SAMPLE_14464	55	1	4	0
SAMPLE_14467	43	1	3	0
SAMPLE_1447	85	4	4	0
SAMPLE_14470	65	0	8	0
SAMPLE_14473	62	0	5	0
SAMPLE_14476	74	0	8	0
SAMPLE_14479	68	0	3	0
SAMPLE_14482	64	1	3	0
SAMPLE_14485	56	8	2	0
SAMPLE_14488	75	0	5	0
SAMPLE_14491	66	1	5	0
SAMPLE_14494	49	0	4	0
SAMPLE_14497	65	0	4	0
SAMPLE_145	112	0	25	0
SAMPLE_1450	107	1	2	0
SAMPLE_14500	53	0	3	0
SAMPLE_14503	112	29	28	13
SAMPLE_14506	44	1	3	0
SAMPLE_14509	61	14	5	3
SAMPLE_14512	78	0	15	0
SAMPLE_14515	76	0	2	0
SAMPLE_14518	76	0	9	0
SAMPLE_14521	64	0	6	0
SAMPLE_14524	74	1	7	0
SAMPLE_14527	88	0	8	0
SAMPLE_1453	82	0	3	0
SAMPLE_14530	89	1	12	0
SAMPLE_14533	51	0	4	0
SAMPLE_14536	58	0	10	0
SAMPLE_14539	98	1	5	0
SAMPLE_14542	55	1	4	0
SAMPLE_14545	78	0	6	0
SAMPLE_14548	77	0	6	0
SAMPLE_14551	48	0	6	0
SAMPLE_14554	88	2	9	0
SAMPLE_14557	55	0	6	0
SAMPLE_1456	67	0	3	0
SAMPLE_14560	59	0	2	0
SAMPLE_14563	80	2	11	0
SAMPLE_14566	60	1	3	0
SAMPLE_14569	78	1	6	0
SAMPLE_14572	55	0	8	0
SAMPLE_14575	78	1	8	0
SAMPLE_14578	47	0	6	0
SAMPLE_14581	80	1	5	0
SAMPLE_14584	45	0	4	0
SAMPLE_14587	75	0	9	0
SAMPLE_1459	92	0	3	0
SAMPLE_14590	45	0	3	0
SAMPLE_14593	63	0	7	0
SAMPLE_14596	68	1	9	1
SAMPLE_14599	43	0	3	0
SAMPLE_14602	70	0	7	0
SAMPLE_14605	82	0	11	0
SAMPLE_14608	63	1	4	0
SAMPLE_14611	57	0	8	0
SAMPLE_14614	63	1	4	0
SAMPLE_14617	60	1	4	0
SAMPLE_1462	29	0	0	0
SAMPLE_14620	60	0	7	0
SAMPLE_14623	70	0	6	0
SAMPLE_14626	43	0	7	0
SAMPLE_14629	70	0	6	0
SAMPLE_14632	76	0	5	0
SAMPLE_14635	65	0	6	0
SAMPLE_14638	61	0	12	0
SAMPLE_14641	107	0	27	0
SAMPLE_14644	44	0	4	0
SAMPLE_14647	84	1	14	0
SAMPLE_1465	76	0	8	0
SAMPLE_14650	56	2	8	0
SAMPLE_14653	71	0	5	0
SAMPLE_14656	62	0	8	0
SAMPLE_14659	69	0	5	0
SAMPLE_14662	74	0	3	0
SAMPLE_14665	75	0	4	0
SAMPLE_14668	78	0	12	0
SAMPLE_14671	52	0	2	0
SAMPLE_14674	82	0	11	0
SAMPLE_14677	69	2	4	0
SAMPLE_1468	65	0	2	0
SAMPLE_14680	74	2	9	0
SAMPLE_14683	102	1	21	0
SAMPLE_14686	74	0	2	0
SAMPLE_14689	71	1	4	0
SAMPLE_14692	66	0	4	0
SAMPLE_14695	52	1	7	0
SAMPLE_14698	46	0	6	0
SAMPLE_14701	68	0	3	0
SAMPLE_14704	60	0	5	0
SAMPLE_14707	64	0	5	0
SAMPLE_1471	94	1	4	0
SAMPLE_14710	70	1	7	0
SAMPLE_14713	60	1	11	0
SAMPLE_14716	89	1	8	0
SAMPLE_14719	51	0	3	0
SAMPLE_14722	67	0	2	0
SAMPLE_14725	79	0	24	0
SAMPLE_14728	43	0	6	0
SAMPLE_14731	68	0	5	0
SAMPLE_14734	55	1	3	0
SAMPLE_14737	68	0	7	0
SAMPLE_1474	78	0	7	0
SAMPLE_14740	68	0	4	0
SAMPLE_14743	73	0	4	0
SAMPLE_14746	86	0	14	0
SAMPLE_14749	87	1	10	0
SAMPLE_14752	75	0	6	0
SAMPLE_14755	69	2	6	0
SAMPLE_14758	59	0	5	0
SAMPLE_14761	64	0	6	0
SAMPLE_14764	84	0	9	0
SAMPLE_14767	52	1	10	0
SAMPLE_1477	51	0	6	0
SAMPLE_14770	61	1	7	1
SAMPLE_14773	57	0	9	0
SAMPLE_14776	118	0	29	0
SAMPLE_14779	64	1	7	0
SAMPLE_14782	82	1	22	1
SAMPLE_14785	50	0	3	0
SAMPLE_14788	56	0	7	0
SAMPLE_14791	72	1	5	0
SAMPLE_14794	114	0	27	0
SAMPLE_14797	59	2	4	0
SAMPLE_148	58	0	6	0
SAMPLE_1480	98	1	4	0
SAMPLE_14800	86	1	3	0
SAMPLE_14803	59	0	9	0
SAMPLE_14806	84	2	10	0
SAMPLE_14809	62	0	5	0
SAMPLE_14812	71	1	9	0
SAMPLE_14815	71	0	13	0
SAMPLE_14818	59	0	4	0
SAMPLE_14821	50	0	4	0
SAMPLE_14824	68	0	8	0
SAMPLE_14827	70	0	7	0
SAMPLE_1483	78	2	3	0
SAMPLE_14830	50	0	5	0
SAMPLE_14833	64	0	2	0
SAMPLE_14836	56	0	8	0
SAMPLE_14839	71	1	7	0
SAMPLE_14842	69	0	6	0
SAMPLE_14845	56	1	5	1
SAMPLE_14848	58	0	8	0
SAMPLE_14851	81	1	5	0
SAMPLE_14854	77	0	4	0
SAMPLE_14857	64	1	7	0
SAMPLE_1486	43	0	5	0
SAMPLE_14860	60	1	3	0
SAMPLE_14863	91	0	7	0
SAMPLE_14866	68	1	5	0
SAMPLE_14869	50	1	7	0
SAMPLE_14872	59	0	5	0
SAMPLE_14875	81	0	2	0
SAMPLE_14878	73	0	5	0
SAMPLE_14881	66	0	10	0
SAMPLE_14884	57	1	6	0
SAMPLE_14887	46	0	1	0
SAMPLE_1489	35	0	2	0
SAMPLE_14890	65	0	2	0
SAMPLE_14893	66	1	15	1
SAMPLE_14896	60	2	4	0
SAMPLE_14899	51	2	5	0
SAMPLE_14902	36	0	4	0
SAMPLE_14905	54	0	5	0
SAMPLE_14908	55	0	4	0
SAMPLE_14911	71	0	5	0
SAMPLE_14914	64	2	6	1
SAMPLE_14917	66	0	5	0
SAMPLE_1492	51	1	5	0
SAMPLE_14920	60	0	6	0
SAMPLE_14923	59	0	7	0
SAMPLE_14926	58	0	2	0
SAMPLE_14929	73	0	5	0
SAMPLE_14932	64	0	8	0
SAMPLE_14935	55	1	8	0
SAMPLE_14938	14	1	1	0
SAMPLE_14941	61	0	6	0
SAMPLE_14944	107	0	12	0
SAMPLE_14947	45	0	7	0
SAMPLE_1495	67	0	0	0
SAMPLE_14950	69	0	5	0
SAMPLE_14953	65	0	6	0
SAMPLE_14956	64	0	8	0
SAMPLE_14959	106	0	6	0
SAMPLE_14962	88	0	10	0
SAMPLE_14965	64	0	7	0
SAMPLE_14968	69	0	10	0
SAMPLE_14971	69	0	7	0
SAMPLE_14974	75	0	5	0
SAMPLE_14977	95	0	9	0
SAMPLE_1498	86	2	2	0
SAMPLE_14980	64	1	3	0
SAMPLE_14983	54	2	8	0
SAMPLE_14986	63	0	16	0
SAMPLE_14989	85	0	19	0
SAMPLE_14992	59	0	7	0
SAMPLE_14995	45	0	5	0
SAMPLE_14998	180	0	79	0
SAMPLE_15001	74	2	3	0
SAMPLE_15004	66	1	6	0
SAMPLE_15007	59	1	10	0
SAMPLE_1501	52	0	8	0
SAMPLE_15010	80	1	4	0
SAMPLE_15013	70	0	8	0
SAMPLE_15016	66	0	4	0
SAMPLE_15019	73	0	5	0
SAMPLE_15022	82	1	7	0
SAMPLE_15025	61	1	5	0
SAMPLE_15028	50	1	4	1
SAMPLE_15031	94	1	6	0
SAMPLE_15034	61	0	4	0
SAMPLE_15037	49	2	1	0
SAMPLE_1504	77	0	6	0
SAMPLE_15040	93	0	7	0
SAMPLE_15043	68	1	7	0
SAMPLE_15046	67	0	8	0
SAMPLE_15049	97	0	9	0
SAMPLE_15052	94	1	8	0
SAMPLE_15055	72	0	8	0
SAMPLE_15058	96	0	5	0
SAMPLE_15061	98	0	11	0
SAMPLE_15064	106	0	9	0
SAMPLE_15067	88	2	8	1
SAMPLE_1507	67	0	10	0
SAMPLE_15070	101	0	10	0
SAMPLE_15073	104	0	10	0
SAMPLE_15076	66	0	9	0
SAMPLE_15079	72	2	8	0
SAMPLE_15082	60	0	4	0
SAMPLE_15085	82	2	3	0
SAMPLE_15088	121	2	12	0
SAMPLE_15091	91	0	7	0
SAMPLE_15094	72	2	8	0
SAMPLE_15097	97	1	5	0
SAMPLE_151	51	0	4	0
SAMPLE_1510	72	2	7	0
SAMPLE_15100	121	0	15	0
SAMPLE_15103	105	0	3	0
SAMPLE_15106	55	0	2	0
SAMPLE_15109	74	0	8	0
SAMPLE_15112	91	0	14	0
SAMPLE_15115	90	2	12	0
SAMPLE_15118	109	0	14	0
SAMPLE_15121	83	0	8	0
SAMPLE_15124	99	0	8	0
SAMPLE_15127	101	0	15	0
SAMPLE_1513	72	1	0	0
SAMPLE_15130	72	0	7	0
SAMPLE_15133	138	0	23	0
SAMPLE_15136	83	1	5	0
SAMPLE_15139	77	0	10	0
SAMPLE_15142	68	1	11	0
SAMPLE_15145	72	2	7	0
SAMPLE_15148	78	0	6	0
SAMPLE_15151	63	1	8	0
SAMPLE_15154	45	2	4	0
SAMPLE_15157	182	1	64	0
SAMPLE_1516	29	0	0	0
SAMPLE_15160	86	0	14	0
SAMPLE_15163	96	0	12	0
SAMPLE_15166	73	1	6	0
SAMPLE_15169	86	1	13	0
SAMPLE_15172	83	0	11	0
SAMPLE_15175	82	2	15	0
SAMPLE_15178	70	2	10	1
SAMPLE_15181	81	1	4	1
SAMPLE_15184	70	0	2	0
SAMPLE_15187	90	0	7	0
SAMPLE_1519	66	1	3	0
SAMPLE_15190	79	0	6	0
SAMPLE_15193	77	0	10	0
SAMPLE_15196	144	0	28	0
SAMPLE_15199	73	1	7	0
SAMPLE_15202	82	0	8	0
SAMPLE_15205	83	1	7	0
SAMPLE_15208	77	2	21	1
SAMPLE_15211	102	2	11	0
SAMPLE_15214	76	0	8	0
SAMPLE_15217	54	0	2	0
SAMPLE_1522	53	0	3	0
SAMPLE_15220	55	0	4	0
SAMPLE_15223	43	0	4	0
SAMPLE_15226	99	1	9	0
SAMPLE_15229	57	0	9	0
SAMPLE_15232	77	0	6	0
SAMPLE_15235	70	0	5	0
SAMPLE_15238	66	1	5	0
SAMPLE_15241	83	0	3	0
SAMPLE_15244	84	0	4	0
SAMPLE_15247	72	0	3	0
SAMPLE_1525	60	0	0	0
SAMPLE_15250	64	0	3	0
SAMPLE_15253	66	0	14	0
SAMPLE_15256	41	2	3	0
SAMPLE_15259	53	0	10	0
SAMPLE_15262	83	2	13	0
SAMPLE_15265	70	0	13	0
SAMPLE_15268	81	2	5	0
SAMPLE_15271	77	1	9	0
SAMPLE_15274	42	1	3	0
SAMPLE_15277	78	2	4	1
SAMPLE_1528	58	0	5	0
SAMPLE_15280	63	2	2	0
SAMPLE_15283	71	0	8	0
SAMPLE_15286	58	0	5	0
SAMPLE_15289	56	0	5	0
SAMPLE_15292	61	0	6	0
SAMPLE_15295	45	0	8	0
SAMPLE_15298	73	1	8	0
SAMPLE_15301	70	0	14	0
SAMPLE_15304	81	0	14	0
SAMPLE_15307	146	1	42	0
SAMPLE_1531	56	1	4	0
SAMPLE_15310	63	1	7	0
SAMPLE_15313	50	1	5	0
SAMPLE_15316	61	0	7	0
SAMPLE_15319	66	1	6	0
SAMPLE_15322	59	0	11	0
SAMPLE_15325	48	1	5	0
SAMPLE_15328	56	0	6	0
SAMPLE_15331	56	0	5	0
SAMPLE_15334	89	1	7	0
SAMPLE_15337	55	0	5	0
SAMPLE_1534	97	0	11	0
SAMPLE_15340	79	1	3	0
SAMPLE_15343	76	0	5	0
SAMPLE_15346	54	0	4	0
SAMPLE_15349	99	1	17	0
SAMPLE_15352	92	1	10	0
SAMPLE_15355	60	1	7	0
SAMPLE_15358	90	1	16	1
SAMPLE_15361	71	2	5	0
SAMPLE_15364	91	1	10	0
SAMPLE_15367	76	0	3	0
SAMPLE_1537	75	0	7	0
SAMPLE_15370	55	0	9	0
SAMPLE_15373	87	3	18	0
SAMPLE_15376	95	16	10	4
SAMPLE_15379	74	1	6	0
SAMPLE_15382	83	2	25	0
SAMPLE_15385	60	0	3	0
SAMPLE_15388	55	0	4	0
SAMPLE_15391	74	2	5	1
[truncated: 4,983 more rows]
