# Supplementary material for: Systematic analysis of paralogous regions in 41,755 exomes uncovers clinically relevant variation
Source: Research Square preprint supplement (doi:10.21203/rs.3.rs-2302399/v1), 2022-11-29
Supplement: Supplementary file 22 [file STable8.xlsx]

## Sheet: STable8
Sample	CodingVAP	CodingVAPConseq	CodingCanonicalENST	Present	NonCodingVAP	NonCodingVAPConseq	NonCodingCanonicalENST	Present
SAMPLE_18245	chr1_104163266_104163266_G/A	missense_variant	ENST00000622339	1	chr1_104257470_104257470_G/A	non_coding_transcript_exon_variant	ENST00000440059	0
SAMPLE_14579	chr1_152280265_152280265_C/G	missense_variant	ENST00000368799	1	chr1_152276979_152276979_C/G	synonymous_variant	ENST00000368799	0
SAMPLE_15442	chr1_155583937_155583937_A/G	missense_variant	ENST00000245564	1	chr1_155719801_155719801_A/G	3_prime_UTR_variant;non_coding_transcript_exon_variant	ENST00000368331;ENST00000314835	0
SAMPLE_17602	chr10_28257852_28257852_C/T	missense_variant_splice_region_variant	ENST00000305242	0	chr10_27570312_27570312_G/A	non_coding_transcript_exon_variant~splice_region_variant	ENST00000438905	1
SAMPLE_17973	chr11_117078735_117078735_G/T	stop_gained	ENST00000320934	0	chr11_117007280_117007280_C/A	non_coding_transcript_exon_variant	ENST00000528464	1
SAMPLE_17972	chr15_41865525_41865525_G/T	missense_variant	ENST00000263798	0	chr15_76552051_76552051_C/A	intron_variant;upstream_gene_variant;non_coding_transcript_exon_variant	ENST00000557943;ENST00000660046;ENST00000558165	1
SAMPLE_18602	chr15_43869426_43869426_C/T	missense_variant	ENST00000420765	0	chr15_43968991_43968991_C/T	non_coding_transcript_exon_variant	ENST00000510070	1
SAMPLE_17971	chr15_43907891_43907891_G/A	missense_variant	ENST00000450892	0	chr15_44007353_44007353_G/A	non_coding_transcript_exon_variant	ENST00000509801	1
SAMPLE_17603	chr15_43907891_43907891_G/A	missense_variant	ENST00000450892	0	chr15_44007353_44007353_G/A	non_coding_transcript_exon_variant	ENST00000509801	1
SAMPLE_17972	chr15_43907891_43907891_G/A	missense_variant	ENST00000450892	0	chr15_44007353_44007353_G/A	non_coding_transcript_exon_variant	ENST00000509801	1
SAMPLE_18245	chr15_43908298_43908298_C/G	missense_variant	ENST00000450892	1	chr15_44007760_44007760_C/G	non_coding_transcript_exon_variant	ENST00000509801	0
SAMPLE_18244	chr15_43908298_43908298_C/G	missense_variant	ENST00000450892	1	chr15_44007760_44007760_C/G	non_coding_transcript_exon_variant	ENST00000509801	0
SAMPLE_14580	chr16_1291831_1291831_G/C	missense_variant	ENST00000338844	1	chr16_1279060_1279060_C/G	upstream_gene_variant;non_coding_transcript_exon_variant;downstream_gene_variant	ENST00000234798;ENST00000606293;ENST00000621827	0
SAMPLE_17545	chr16_21756236_21756236_A/G	missense_variant	ENST00000646100	0	chr16_22572359_22572359_A/G	non_coding_transcript_exon_variant	ENST00000550753	1
SAMPLE_17971	chr16_21756236_21756236_A/G	missense_variant	ENST00000646100	0	chr16_22572359_22572359_A/G	non_coding_transcript_exon_variant	ENST00000550753	1
SAMPLE_18602	chr16_21756236_21756236_A/G	missense_variant	ENST00000646100	0	chr16_22572359_22572359_A/G	non_coding_transcript_exon_variant	ENST00000550753	1
SAMPLE_17546	chr16_21756236_21756236_A/G	missense_variant	ENST00000646100	0	chr16_22572359_22572359_A/G	non_coding_transcript_exon_variant	ENST00000550753	1
SAMPLE_18245	chr16_21756254_21756254_G/A	missense_variant	ENST00000646100	0	chr16_22572377_22572377_G/A	non_coding_transcript_exon_variant	ENST00000550753	1
SAMPLE_18245	chr16_2983299_2983299_G/T	missense_variant	ENST00000253928	0	chr3_180546668_180546668_C/A	non_coding_transcript_exon_variant;non_coding_transcript_variant~intron_variant	ENST00000460917;ENST00000485055	1
SAMPLE_17972	chr16_70178401_70178401_A/T	missense_variant	ENST00000288050	1	chr16_74370527_74370527_T/A	downstream_gene_variant	ENST00000429810	0
SAMPLE_18245	chr17_14139936_14139937_GT/-	frameshift_variant	ENST00000420162	0	chr17_13928044_13928045_AC/-	non_coding_transcript_exon_variant	ENST00000577632	1
SAMPLE_18244	chr17_14139936_14139937_GT/-	frameshift_variant	ENST00000420162	0	chr17_13928044_13928045_AC/-	non_coding_transcript_exon_variant	ENST00000577632	1
SAMPLE_17604	chr19_50462860_50462860_C/T	missense_variant	ENST00000447370	1	chr19_50474398_50474398_G/A	non_coding_transcript_exon_variant	ENST00000602139	0
SAMPLE_17604	chr19_51273862_51273862_A/T	missense_variant	ENST00000270590	0	chr19_51261635_51261635_A/T	upstream_gene_variant	ENST00000601788	1
SAMPLE_17602	chr19_51273862_51273862_A/T	missense_variant	ENST00000270590	0	chr19_51261635_51261635_A/T	upstream_gene_variant	ENST00000601788	1
SAMPLE_15442	chr19_53770569_53770569_G/C	missense_variant	ENST00000311170	0	chr19_53818742_53818742_C/G	non_coding_transcript_exon_variant	ENST00000458417	1
SAMPLE_15443	chr19_53770570_53770570_C/-	frameshift_variant	ENST00000311170	0	chr19_53818741_53818741_G/-	non_coding_transcript_exon_variant	ENST00000458417	1
SAMPLE_17604	chr2_129026227_129026227_G/T	missense_variant	ENST00000259241	0	chr1_21755539_21755539_C/A	non_coding_transcript_exon_variant;upstream_gene_variant	ENST00000481504;ENST00000453025	1
SAMPLE_17603	chr2_129075797_129075797_A/C	missense_variant	ENST00000259241	0	chr1_21755135_21755135_T/G	non_coding_transcript_exon_variant;upstream_gene_variant	ENST00000481504;ENST00000453025	1
SAMPLE_18603	chr2_129075877_129075877_G/T	missense_variant	ENST00000259241	0	chr1_21755055_21755055_C/A	non_coding_transcript_exon_variant;upstream_gene_variant	ENST00000481504;ENST00000453025	1
SAMPLE_17603	chr2_129075877_129075877_G/T	missense_variant	ENST00000259241	0	chr1_21755055_21755055_C/A	upstream_gene_variant;non_coding_transcript_exon_variant	ENST00000453025;ENST00000481504	1
SAMPLE_18601	chr2_86400832_86400832_G/C	missense_variant	ENST00000410111	0	chr21_46097641_46097641_G/C	non_coding_transcript_exon_variant;intron_variant;downstream_gene_variant	ENST00000435590;ENST00000323084;ENST00000391617	1
SAMPLE_15443	chr2_96692489_96692489_C/T	missense_variant	ENST00000434632	1	chr2_96463586_96463586_G/A	non_coding_transcript_exon_variant	ENST00000444924	0
SAMPLE_15442	chr2_96692489_96692489_C/T	missense_variant	ENST00000434632	1	chr2_96463586_96463586_G/A	non_coding_transcript_exon_variant	ENST00000444924	0
SAMPLE_18601	chr2_96692581_96692581_C/T	missense_variant	ENST00000434632	0	chr2_96463494_96463494_G/A	non_coding_transcript_exon_variant	ENST00000444924	1
SAMPLE_18602	chr2_96692581_96692581_C/T	missense_variant	ENST00000434632	0	chr2_96463494_96463494_G/A	non_coding_transcript_exon_variant	ENST00000444924	1
SAMPLE_15442	chr22_24300580_24300580_C/T	missense_variant	ENST00000290765	0	chr22_24325127_24325127_G/A	missense_variant;downstream_gene_variant;upstream_gene_variant	ENST00000621118;ENST00000437021;ENST00000404092	1
SAMPLE_17545	chr22_42954434_42954434_C/G	missense_variant	ENST00000327678	1	chr22_42901119_42901119_C/G	downstream_gene_variant;non_coding_transcript_exon_variant	ENST00000323013;ENST00000359906	0
SAMPLE_17547	chr22_42954434_42954434_C/G	missense_variant	ENST00000327678	1	chr22_42901119_42901119_C/G	downstream_gene_variant;non_coding_transcript_exon_variant	ENST00000323013;ENST00000359906	0
SAMPLE_15444	chr3_195451613_195451613_A/G	missense_variant	ENST00000447234	1	chr3_195345561_195345561_A/G	non_coding_transcript_exon_variant	ENST00000457750	0
SAMPLE_18244	chr3_195451613_195451613_A/G	missense_variant	ENST00000447234	0	chr3_195345561_195345561_A/G	non_coding_transcript_exon_variant	ENST00000457750	1
SAMPLE_18245	chr3_195452649_195452649_C/T	missense_variant	ENST00000447234	1	chr3_195346312_195346312_C/T	non_coding_transcript_exon_variant	ENST00000457750	0
SAMPLE_18601	chr3_195452649_195452649_C/T	missense_variant	ENST00000447234	1	chr3_195346312_195346312_C/T	non_coding_transcript_exon_variant	ENST00000457750	0
SAMPLE_18246	chr3_195452649_195452649_C/T	missense_variant	ENST00000447234	1	chr3_195346312_195346312_C/T	non_coding_transcript_exon_variant	ENST00000457750	0
SAMPLE_15443	chr3_195452649_195452649_C/T	missense_variant	ENST00000447234	1	chr3_195346312_195346312_C/T	non_coding_transcript_exon_variant	ENST00000457750	0
SAMPLE_18244	chr3_195452649_195452649_C/T	missense_variant	ENST00000447234	1	chr3_195346312_195346312_C/T	non_coding_transcript_exon_variant	ENST00000457750	0
SAMPLE_17604	chr6_32009787_32009787_A/G	splice_donor_variant	ENST00000451343	1	chr6_31977052_31977052_A/G	downstream_gene_variant;splice_donor_variant~non_coding_transcript_variant;upstream_gene_variant	ENST00000342991;ENST00000507684;ENST00000512515	0
SAMPLE_18602	chr6_32009787_32009787_A/G	splice_donor_variant	ENST00000451343	1	chr6_31977052_31977052_A/G	upstream_gene_variant;splice_donor_variant~non_coding_transcript_variant;downstream_gene_variant	ENST00000512515;ENST00000507684;ENST00000342991	0
SAMPLE_17971	chr6_32009879_32009879_C/T	missense_variant	ENST00000451343	0	chr6_31977144_31977144_C/T	upstream_gene_variant;non_coding_transcript_exon_variant;downstream_gene_variant	ENST00000512515;ENST00000507684;ENST00000342991	1
SAMPLE_17972	chr6_32009879_32009879_C/T	missense_variant	ENST00000451343	0	chr6_31977144_31977144_C/T	non_coding_transcript_exon_variant;upstream_gene_variant;downstream_gene_variant	ENST00000507684;ENST00000512515;ENST00000342991	1
SAMPLE_17973	chr6_32009902_32009902_C/T	missense_variant	ENST00000451343	0	chr6_31977167_31977167_C/T	downstream_gene_variant;upstream_gene_variant;non_coding_transcript_exon_variant	ENST00000342991;ENST00000512515;ENST00000507684	1
SAMPLE_17545	chr6_32010572_32010572_G/T	missense_variant	ENST00000451343	0	chr6_31977838_31977838_G/T	upstream_gene_variant;downstream_gene_variant;non_coding_transcript_exon_variant;upstream_gene_variant	ENST00000435363;ENST00000342991;ENST00000507684;ENST00000512515	1
SAMPLE_15444	chr7_143556111_143556111_G/A	missense_variant	ENST00000479870	0	chr7_143300010_143300010_C/T	non_coding_transcript_exon_variant	ENST00000414990	1
SAMPLE_17973	chr7_143560067_143560067_G/T	missense_variant	ENST00000479870	0	chr7_143295954_143295954_C/A	non_coding_transcript_exon_variant	ENST00000414990	1
SAMPLE_18245	chr7_144062733_144062733_C/G	missense_variant	ENST00000056217	1	chr7_143981089_143981089_G/C	non_coding_transcript_exon_variant;non_coding_transcript_variant~intron_variant	ENST00000483587;ENST00000463561	0
SAMPLE_18245	chr7_144062734_144062734_C/A	missense_variant	ENST00000056217	1	chr7_143981088_143981088_G/T	non_coding_transcript_variant~intron_variant;non_coding_transcript_exon_variant	ENST00000463561;ENST00000483587	0
SAMPLE_17972	chr7_144069411_144069411_C/T	missense_variant	ENST00000056217	0	chr7_143974411_143974411_G/A	non_coding_transcript_exon_variant;non_coding_transcript_variant~intron_variant	ENST00000483587;ENST00000463561	1
SAMPLE_14580	chr7_6013049_6013049_C/G	missense_variant	ENST00000265849	1	chr7_6791004_6791004_G/C	non_coding_transcript_exon_variant;upstream_gene_variant	ENST00000403974;ENST00000403107	0
SAMPLE_15442	chr9_135944586_135944586_C/T	missense_variant	ENST00000372080	0	chr9_135960370_135960370_C/T	downstream_gene_variant	ENST00000624767	1
SAMPLE_15444	chrX_148679733_148679733_T/C	missense_variant	ENST00000600449	0	chrX_148852967_148852967_A/G	non_coding_transcript_exon_variant;upstream_gene_variant	ENST00000524311;ENST00000370416	1
SAMPLE_15443	chrX_15268631_15268631_C/A	missense_variant	ENST00000380488	0	chr15_93339357_93339357_G/T	non_coding_transcript_exon_variant	ENST00000557146	1
SAMPLE_17546	chrX_15268631_15268631_C/A	missense_variant	ENST00000380488	0	chr15_93339357_93339357_G/T	non_coding_transcript_exon_variant	ENST00000557146	1
SAMPLE_15442	chrX_15268631_15268631_C/A	missense_variant	ENST00000380488	0	chr15_93339357_93339357_G/T	non_coding_transcript_exon_variant	ENST00000557146	1
SAMPLE_18603	chrX_153784529_153784529_G/A	missense_variant	ENST00000618670	1	chrX_153876398_153876398_C/T	downstream_gene_variant;non_coding_transcript_exon_variant	ENST00000247306;ENST00000612193	0
SAMPLE_14580	chrX_153784529_153784529_G/A	missense_variant	ENST00000618670	1	chrX_153876398_153876398_C/T	non_coding_transcript_exon_variant;downstream_gene_variant	ENST00000612193;ENST00000247306	0
