# Supplementary material for: Systematic analysis of paralogous regions in 41,755 exomes uncovers clinically relevant variation
Source: Research Square preprint supplement (doi:10.21203/rs.3.rs-2302399/v1), 2022-11-29
Supplement: Supplementary file 23 [file STable9.xlsx]

## Sheet: STable9
Sample	NrOfSyn	NrOfMiss	NrOfLoF
SAMPLE_1	1028	995	38
SAMPLE_10	533	693	33
SAMPLE_100	613	757	27
SAMPLE_1000	512	683	21
SAMPLE_10000	606	780	24
SAMPLE_10001	555	756	20
SAMPLE_10002	599	801	24
SAMPLE_10003	579	703	35
SAMPLE_10004	528	669	22
SAMPLE_10005	608	743	28
SAMPLE_10006	600	766	31
SAMPLE_10007	577	675	36
SAMPLE_10008	566	757	22
SAMPLE_10009	555	744	26
SAMPLE_1001	536	685	24
SAMPLE_10010	590	746	31
SAMPLE_10011	543	769	28
SAMPLE_10012	577	775	19
SAMPLE_10013	576	772	13
SAMPLE_10014	538	712	32
SAMPLE_10015	549	671	28
SAMPLE_10016	540	664	27
SAMPLE_10017	594	709	37
SAMPLE_10018	1314	1360	34
SAMPLE_10019	2136	2053	57
SAMPLE_1002	538	694	27
SAMPLE_10020	549	731	32
SAMPLE_10021	632	739	25
SAMPLE_10022	617	743	18
SAMPLE_10023	580	704	29
SAMPLE_10024	518	657	42
SAMPLE_10025	505	669	24
SAMPLE_10026	564	648	31
SAMPLE_10027	590	753	26
SAMPLE_10028	564	688	28
SAMPLE_10029	585	756	20
SAMPLE_1003	547	707	30
SAMPLE_10030	792	898	31
SAMPLE_10031	838	938	28
SAMPLE_10032	795	849	29
SAMPLE_10033	532	679	25
SAMPLE_10034	537	710	30
SAMPLE_10035	563	710	31
SAMPLE_10036	559	724	25
SAMPLE_10037	509	731	15
SAMPLE_10038	557	716	27
SAMPLE_10039	954	990	37
SAMPLE_1004	524	665	34
SAMPLE_10040	522	607	17
SAMPLE_10041	1118	1158	38
SAMPLE_10042	536	706	33
SAMPLE_10043	546	711	27
SAMPLE_10044	574	707	36
SAMPLE_10045	3564	3297	98
SAMPLE_10046	3471	3172	100
SAMPLE_10047	3590	3251	91
SAMPLE_10048	547	716	23
SAMPLE_10049	578	755	25
SAMPLE_1005	562	730	22
SAMPLE_10050	520	670	24
SAMPLE_10051	537	670	22
SAMPLE_10052	559	689	23
SAMPLE_10053	550	685	24
SAMPLE_10054	525	727	25
SAMPLE_10055	528	733	25
SAMPLE_10056	552	720	31
SAMPLE_10057	542	755	23
SAMPLE_10058	525	699	24
SAMPLE_10059	535	707	23
SAMPLE_1006	581	698	34
SAMPLE_10060	532	689	27
SAMPLE_10061	573	684	25
SAMPLE_10062	538	668	16
SAMPLE_10063	512	644	24
SAMPLE_10064	545	727	26
SAMPLE_10065	495	658	20
SAMPLE_10066	602	783	31
SAMPLE_10067	603	775	27
SAMPLE_10068	537	781	28
SAMPLE_10069	571	719	18
SAMPLE_1007	580	687	20
SAMPLE_10070	580	709	30
SAMPLE_10071	554	702	18
SAMPLE_10072	510	641	22
SAMPLE_10073	551	677	30
SAMPLE_10074	533	641	19
SAMPLE_10075	500	663	26
SAMPLE_10076	582	695	35
SAMPLE_10077	472	683	27
SAMPLE_10078	583	747	20
SAMPLE_10079	534	728	23
SAMPLE_1008	578	690	28
SAMPLE_10080	581	664	19
SAMPLE_10081	592	683	28
SAMPLE_10082	611	707	26
SAMPLE_10083	538	690	27
SAMPLE_10084	702	823	20
SAMPLE_10085	714	814	14
SAMPLE_10086	698	846	17
SAMPLE_10087	809	929	32
SAMPLE_10088	994	1047	34
SAMPLE_10089	565	702	25
SAMPLE_1009	505	623	23
SAMPLE_10090	568	767	32
SAMPLE_10091	601	749	36
SAMPLE_10092	570	744	24
SAMPLE_10093	929	977	38
SAMPLE_10094	579	702	16
SAMPLE_10095	1044	1109	47
SAMPLE_10096	490	722	29
SAMPLE_10097	516	692	28
SAMPLE_10098	526	747	25
SAMPLE_10099	520	706	32
SAMPLE_101	562	680	28
SAMPLE_1010	473	608	27
SAMPLE_10100	513	724	24
SAMPLE_10101	547	674	37
SAMPLE_10102	672	800	29
SAMPLE_10103	584	717	31
SAMPLE_10104	911	927	30
SAMPLE_10105	560	706	25
SAMPLE_10106	555	704	20
SAMPLE_10107	549	713	32
SAMPLE_10108	481	660	21
SAMPLE_10109	580	697	30
SAMPLE_1011	571	736	22
SAMPLE_10110	502	715	26
SAMPLE_10111	529	751	38
SAMPLE_10112	503	696	31
SAMPLE_10113	524	733	29
SAMPLE_10114	545	734	24
SAMPLE_10115	567	712	29
SAMPLE_10116	528	653	27
SAMPLE_10117	535	653	25
SAMPLE_10118	578	738	30
SAMPLE_10119	544	733	24
SAMPLE_1012	475	642	24
SAMPLE_10120	563	735	27
SAMPLE_10121	564	734	26
SAMPLE_10122	549	697	29
SAMPLE_10123	782	922	34
SAMPLE_10124	486	647	22
SAMPLE_10125	916	1005	34
SAMPLE_10126	565	756	33
SAMPLE_10127	551	708	29
SAMPLE_10128	578	718	26
SAMPLE_10129	576	718	30
SAMPLE_1013	541	670	22
SAMPLE_10130	555	719	33
SAMPLE_10131	538	729	31
SAMPLE_10132	564	735	35
SAMPLE_10133	605	775	39
SAMPLE_10134	551	661	23
SAMPLE_10135	610	772	32
SAMPLE_10136	576	709	29
SAMPLE_10137	568	696	27
SAMPLE_10138	619	737	25
SAMPLE_10139	637	751	38
SAMPLE_1014	506	609	19
SAMPLE_10140	521	710	18
SAMPLE_10141	850	1021	44
SAMPLE_10142	983	1187	44
SAMPLE_10143	577	724	27
SAMPLE_10144	549	735	34
SAMPLE_10145	536	711	35
SAMPLE_10146	547	689	37
SAMPLE_10147	1022	1153	29
SAMPLE_10148	1059	1128	40
SAMPLE_10149	1038	1183	43
SAMPLE_1015	1171	1268	52
SAMPLE_10150	628	742	25
SAMPLE_10151	613	731	22
SAMPLE_10152	552	708	23
SAMPLE_10153	500	737	28
SAMPLE_10154	485	663	35
SAMPLE_10155	608	745	35
SAMPLE_10156	555	693	27
SAMPLE_10157	617	733	34
SAMPLE_10158	502	684	28
SAMPLE_10159	593	775	28
SAMPLE_1016	1154	1256	41
SAMPLE_10160	588	745	25
SAMPLE_10161	552	706	27
SAMPLE_10162	680	788	29
SAMPLE_10163	753	816	33
SAMPLE_10164	528	708	22
SAMPLE_10165	770	938	23
SAMPLE_10166	686	819	33
SAMPLE_10167	729	887	36
SAMPLE_10168	581	672	21
SAMPLE_10169	578	665	25
SAMPLE_1017	1347	1391	66
SAMPLE_10170	593	732	24
SAMPLE_10171	520	714	28
SAMPLE_10172	537	718	23
SAMPLE_10173	559	708	23
SAMPLE_10174	604	743	28
SAMPLE_10175	566	696	20
SAMPLE_10176	581	742	26
SAMPLE_10177	526	725	35
SAMPLE_10178	533	663	27
SAMPLE_10179	550	664	23
SAMPLE_1018	1214	1185	31
SAMPLE_10180	777	855	29
SAMPLE_10181	706	804	26
SAMPLE_10182	789	914	34
SAMPLE_10183	731	825	31
SAMPLE_10184	686	797	35
SAMPLE_10185	675	775	33
SAMPLE_10186	1091	1135	41
SAMPLE_10187	889	1036	34
SAMPLE_10188	1060	1067	37
SAMPLE_10189	1953	1833	52
SAMPLE_1019	1321	1319	45
SAMPLE_10190	3218	2817	86
SAMPLE_10191	550	724	18
SAMPLE_10192	593	721	25
SAMPLE_10193	554	726	26
SAMPLE_10194	532	655	18
SAMPLE_10195	564	739	25
SAMPLE_10196	576	692	25
SAMPLE_10197	555	749	30
SAMPLE_10198	534	660	27
SAMPLE_10199	602	705	34
SAMPLE_102	675	809	30
SAMPLE_1020	1442	1475	33
SAMPLE_10200	533	693	23
SAMPLE_10201	874	1010	39
SAMPLE_10202	572	740	34
SAMPLE_10203	1139	1169	46
SAMPLE_10204	518	645	22
SAMPLE_10205	580	743	28
SAMPLE_10206	554	746	22
SAMPLE_10207	596	733	31
SAMPLE_10208	602	734	33
SAMPLE_10209	527	761	30
SAMPLE_1021	537	670	17
SAMPLE_10210	555	698	22
SAMPLE_10211	574	687	23
SAMPLE_10212	580	689	27
SAMPLE_10213	564	702	25
SAMPLE_10214	640	716	30
SAMPLE_10215	518	673	33
SAMPLE_10216	549	737	36
SAMPLE_10217	547	721	29
SAMPLE_10218	582	756	24
SAMPLE_10219	576	654	34
SAMPLE_1022	548	645	22
SAMPLE_10220	590	687	26
SAMPLE_10221	598	730	30
SAMPLE_10222	572	709	23
SAMPLE_10223	604	807	22
SAMPLE_10224	549	693	35
SAMPLE_10225	556	678	37
SAMPLE_10226	529	685	30
SAMPLE_10227	583	670	24
SAMPLE_10228	496	598	33
SAMPLE_10229	536	663	26
SAMPLE_1023	553	696	27
SAMPLE_10230	530	669	27
SAMPLE_10231	896	1036	30
SAMPLE_10232	926	1078	33
SAMPLE_10233	949	1090	29
SAMPLE_10234	597	691	23
SAMPLE_10235	591	705	29
SAMPLE_10236	604	753	16
SAMPLE_10237	621	781	34
SAMPLE_10238	594	747	37
SAMPLE_10239	584	736	26
SAMPLE_1024	500	690	27
SAMPLE_10240	543	706	26
SAMPLE_10241	552	728	30
SAMPLE_10242	565	710	28
SAMPLE_10243	617	707	36
SAMPLE_10244	717	841	43
SAMPLE_10245	539	672	28
SAMPLE_10246	1831	1747	60
SAMPLE_10247	597	724	28
SAMPLE_10248	2796	2615	78
SAMPLE_10249	676	783	25
SAMPLE_1025	509	683	19
SAMPLE_10250	683	865	28
SAMPLE_10251	713	827	26
SAMPLE_10252	539	752	23
SAMPLE_10253	514	721	22
SAMPLE_10254	565	678	22
SAMPLE_10255	563	651	39
SAMPLE_10256	586	680	37
SAMPLE_10257	555	669	30
SAMPLE_10258	482	691	27
SAMPLE_10259	590	701	34
SAMPLE_1026	555	730	25
SAMPLE_10260	521	702	33
SAMPLE_10261	596	704	35
SAMPLE_10262	565	697	25
SAMPLE_10263	586	669	35
SAMPLE_10264	523	627	29
SAMPLE_10265	485	627	14
SAMPLE_10266	567	673	38
SAMPLE_10267	641	775	39
SAMPLE_10268	665	795	29
SAMPLE_10269	589	702	30
SAMPLE_1027	619	795	23
SAMPLE_10270	1504	1531	38
SAMPLE_10271	2380	2223	59
SAMPLE_10272	599	722	17
SAMPLE_10273	564	689	23
SAMPLE_10274	563	723	22
SAMPLE_10275	577	717	35
SAMPLE_10276	560	697	30
SAMPLE_10277	567	695	29
SAMPLE_10278	548	657	33
SAMPLE_10279	518	684	21
SAMPLE_1028	591	752	22
SAMPLE_10280	511	684	24
SAMPLE_10281	558	707	23
SAMPLE_10282	499	675	30
SAMPLE_10283	540	705	28
SAMPLE_10284	546	676	30
SAMPLE_10285	596	727	35
SAMPLE_10286	545	661	31
SAMPLE_10287	596	740	27
SAMPLE_10288	896	1007	46
SAMPLE_10289	803	925	33
SAMPLE_1029	622	811	28
SAMPLE_10290	923	1033	55
SAMPLE_10291	586	689	23
SAMPLE_10292	547	676	24
SAMPLE_10293	571	692	27
SAMPLE_10294	576	745	27
SAMPLE_10295	592	743	34
SAMPLE_10296	542	679	16
SAMPLE_10297	530	684	24
SAMPLE_10298	553	752	25
SAMPLE_10299	542	655	27
SAMPLE_103	526	661	24
SAMPLE_1030	678	766	38
SAMPLE_10300	576	785	22
SAMPLE_10301	666	811	31
SAMPLE_10302	492	686	24
SAMPLE_10303	562	690	16
SAMPLE_10304	541	679	20
SAMPLE_10305	571	693	18
SAMPLE_10306	1079	1216	44
SAMPLE_10307	997	1122	37
SAMPLE_10308	1015	1125	36
SAMPLE_10309	525	665	25
SAMPLE_1031	779	871	35
SAMPLE_10310	555	639	16
SAMPLE_10311	504	718	38
SAMPLE_10312	525	684	21
SAMPLE_10313	544	656	28
SAMPLE_10314	553	692	19
SAMPLE_10315	727	821	29
SAMPLE_10316	767	912	33
SAMPLE_10317	728	851	26
SAMPLE_10318	550	709	16
SAMPLE_10319	531	679	28
SAMPLE_1032	575	658	31
SAMPLE_10320	586	715	17
SAMPLE_10321	703	822	26
SAMPLE_10322	775	904	29
SAMPLE_10323	769	862	28
SAMPLE_10324	579	725	20
SAMPLE_10325	503	620	27
SAMPLE_10326	596	738	20
SAMPLE_10327	649	778	28
SAMPLE_10328	658	797	35
SAMPLE_10329	694	792	19
SAMPLE_1033	674	789	26
SAMPLE_10330	606	764	21
SAMPLE_10331	583	705	26
SAMPLE_10332	582	737	19
SAMPLE_10333	758	901	27
SAMPLE_10334	847	954	40
SAMPLE_10335	638	811	16
SAMPLE_10336	569	717	33
SAMPLE_10337	616	796	32
SAMPLE_10338	572	700	39
SAMPLE_10339	551	709	26
SAMPLE_1034	545	755	28
SAMPLE_10340	578	666	24
SAMPLE_10341	577	723	28
SAMPLE_10342	524	634	32
SAMPLE_10343	562	685	22
SAMPLE_10344	566	700	33
SAMPLE_10345	994	1163	38
SAMPLE_10346	1020	1209	45
SAMPLE_10347	1079	1078	41
SAMPLE_10348	527	694	30
SAMPLE_10349	546	673	30
SAMPLE_1035	766	849	25
SAMPLE_10350	546	675	30
SAMPLE_10351	582	664	34
SAMPLE_10352	572	680	35
SAMPLE_10353	542	673	27
SAMPLE_10354	536	708	26
SAMPLE_10355	523	681	21
SAMPLE_10356	551	731	25
SAMPLE_10357	705	799	26
SAMPLE_10358	735	804	32
SAMPLE_10359	728	782	18
SAMPLE_1036	499	678	27
SAMPLE_10360	591	704	17
SAMPLE_10361	516	631	30
SAMPLE_10362	605	725	19
SAMPLE_10363	1098	1174	47
SAMPLE_10364	1117	1143	38
SAMPLE_10365	1077	1187	51
SAMPLE_10366	583	719	26
SAMPLE_10367	594	724	27
SAMPLE_10368	559	706	25
SAMPLE_10369	556	690	29
SAMPLE_1037	535	670	24
SAMPLE_10370	605	742	34
SAMPLE_10371	594	730	28
SAMPLE_10372	506	683	24
SAMPLE_10373	550	697	25
SAMPLE_10374	557	695	31
SAMPLE_10375	548	675	41
SAMPLE_10376	577	677	45
SAMPLE_10377	559	657	31
SAMPLE_10378	540	655	35
SAMPLE_10379	564	711	28
SAMPLE_1038	519	697	24
SAMPLE_10380	549	684	25
SAMPLE_10381	536	709	25
SAMPLE_10382	540	681	29
SAMPLE_10383	557	679	21
SAMPLE_10384	589	664	27
SAMPLE_10385	579	674	21
SAMPLE_10386	558	670	35
SAMPLE_10387	509	716	24
SAMPLE_10388	487	690	23
SAMPLE_10389	541	684	24
SAMPLE_1039	553	715	17
SAMPLE_10390	607	791	25
SAMPLE_10391	587	754	26
SAMPLE_10392	630	780	25
SAMPLE_10393	431	646	25
SAMPLE_10394	510	651	27
SAMPLE_10395	511	697	32
SAMPLE_10396	525	639	20
SAMPLE_10397	506	657	29
SAMPLE_10398	548	681	30
SAMPLE_10399	495	649	29
SAMPLE_104	569	684	29
SAMPLE_1040	504	663	19
SAMPLE_10400	507	615	29
SAMPLE_10401	495	701	34
SAMPLE_10402	586	706	26
SAMPLE_10403	548	727	32
SAMPLE_10404	547	622	16
SAMPLE_10405	599	739	29
SAMPLE_10406	622	706	31
SAMPLE_10407	570	741	27
SAMPLE_10408	577	711	26
SAMPLE_10409	571	705	27
SAMPLE_1041	583	714	19
SAMPLE_10410	581	685	25
SAMPLE_10411	520	715	29
SAMPLE_10412	556	709	34
SAMPLE_10413	590	752	27
SAMPLE_10414	564	742	27
SAMPLE_10415	550	713	26
SAMPLE_10416	606	761	24
SAMPLE_10417	545	644	23
SAMPLE_10418	576	716	24
SAMPLE_10419	552	681	21
SAMPLE_1042	570	667	31
SAMPLE_10420	620	730	26
SAMPLE_10421	609	750	25
SAMPLE_10422	761	848	34
SAMPLE_10423	661	758	28
SAMPLE_10424	790	868	25
SAMPLE_10425	595	722	24
SAMPLE_10426	489	644	21
SAMPLE_10427	555	744	30
SAMPLE_10428	569	711	32
SAMPLE_10429	552	686	32
SAMPLE_1043	554	660	20
SAMPLE_10430	602	703	35
SAMPLE_10431	572	681	30
SAMPLE_10432	550	710	26
SAMPLE_10433	501	620	21
SAMPLE_10434	569	661	27
SAMPLE_10435	1126	1408	54
SAMPLE_10436	584	719	31
SAMPLE_10437	509	706	21
SAMPLE_10438	548	683	25
SAMPLE_10439	498	699	26
SAMPLE_1044	591	652	35
SAMPLE_10440	528	641	23
SAMPLE_10441	541	651	27
SAMPLE_10442	582	667	27
SAMPLE_10443	526	718	32
SAMPLE_10444	564	754	31
SAMPLE_10445	519	685	14
SAMPLE_10446	581	784	32
SAMPLE_10447	552	723	31
SAMPLE_10448	561	638	34
SAMPLE_10449	558	802	22
SAMPLE_1045	587	720	26
SAMPLE_10450	538	677	23
SAMPLE_10451	492	646	37
SAMPLE_10452	577	705	21
SAMPLE_10453	513	691	26
SAMPLE_10454	545	674	18
SAMPLE_10455	540	742	28
SAMPLE_10456	589	769	23
SAMPLE_10457	592	761	25
SAMPLE_10458	596	743	20
SAMPLE_10459	805	898	27
SAMPLE_1046	561	698	30
SAMPLE_10460	985	1056	38
SAMPLE_10461	539	712	27
SAMPLE_10462	956	984	35
SAMPLE_10463	598	756	29
SAMPLE_10464	1381	1379	42
SAMPLE_10465	597	707	32
SAMPLE_10466	527	651	27
SAMPLE_10467	574	703	29
SAMPLE_10468	550	625	26
SAMPLE_10469	531	668	21
SAMPLE_1047	544	610	28
SAMPLE_10470	521	687	31
SAMPLE_10471	670	763	25
SAMPLE_10472	627	723	34
SAMPLE_10473	597	757	20
SAMPLE_10474	707	840	42
SAMPLE_10475	712	849	36
SAMPLE_10476	661	766	34
SAMPLE_10477	571	694	24
SAMPLE_10478	506	653	27
SAMPLE_10479	586	707	14
SAMPLE_1048	561	726	24
SAMPLE_10480	611	843	33
SAMPLE_10481	587	783	29
SAMPLE_10482	539	777	23
SAMPLE_10483	597	671	33
SAMPLE_10484	570	648	31
SAMPLE_10485	569	657	26
SAMPLE_10486	1086	1260	38
SAMPLE_10487	527	660	23
SAMPLE_10488	553	703	21
SAMPLE_10489	559	723	18
SAMPLE_1049	548	652	21
SAMPLE_10490	569	697	17
SAMPLE_10491	541	698	15
SAMPLE_10492	529	691	30
SAMPLE_10493	570	702	28
SAMPLE_10494	564	673	25
SAMPLE_10495	586	776	29
SAMPLE_10496	548	752	37
SAMPLE_10497	616	781	23
SAMPLE_10498	985	1179	53
SAMPLE_10499	992	1116	29
SAMPLE_105	545	699	20
SAMPLE_1050	549	756	33
SAMPLE_10500	984	1177	47
SAMPLE_10501	2095	1931	41
SAMPLE_10502	512	683	17
SAMPLE_10503	3274	2890	67
SAMPLE_10504	525	664	20
SAMPLE_10505	523	679	20
SAMPLE_10506	566	644	24
SAMPLE_10507	552	692	28
SAMPLE_10508	486	633	32
SAMPLE_10509	588	661	27
SAMPLE_1051	578	746	34
SAMPLE_10510	564	746	29
SAMPLE_10511	627	762	31
SAMPLE_10512	550	752	23
SAMPLE_10513	494	664	29
SAMPLE_10514	506	684	39
SAMPLE_10515	518	698	23
SAMPLE_10516	552	732	31
SAMPLE_10517	532	693	32
SAMPLE_10518	541	751	24
SAMPLE_10519	534	692	20
SAMPLE_1052	579	756	30
SAMPLE_10520	572	688	27
SAMPLE_10521	539	715	25
SAMPLE_10522	1009	1143	45
SAMPLE_10523	1020	1051	41
SAMPLE_10524	1236	1367	61
SAMPLE_10525	558	702	35
SAMPLE_10526	546	651	28
SAMPLE_10527	552	687	26
SAMPLE_10528	513	670	19
SAMPLE_10529	596	766	31
SAMPLE_1053	503	633	21
SAMPLE_10530	535	655	21
SAMPLE_10531	524	674	21
SAMPLE_10532	512	711	26
SAMPLE_10533	577	740	26
SAMPLE_10534	542	766	37
SAMPLE_10535	541	676	30
SAMPLE_10536	521	729	31
SAMPLE_10537	534	663	35
SAMPLE_10538	558	668	19
SAMPLE_10539	538	656	24
SAMPLE_1054	1057	1112	34
SAMPLE_10540	572	705	26
SAMPLE_10541	578	700	29
SAMPLE_10542	567	719	15
SAMPLE_10543	702	822	28
SAMPLE_10544	675	836	32
SAMPLE_10545	757	905	43
SAMPLE_10546	529	685	22
SAMPLE_10547	540	720	21
SAMPLE_10548	557	714	26
SAMPLE_10549	512	628	19
SAMPLE_1055	1101	1182	35
SAMPLE_10550	513	634	22
SAMPLE_10551	515	644	26
SAMPLE_10552	522	672	26
SAMPLE_10553	558	684	27
SAMPLE_10554	537	682	27
SAMPLE_10555	548	690	28
SAMPLE_10556	550	705	29
SAMPLE_10557	526	697	18
SAMPLE_10558	595	757	24
SAMPLE_10559	603	705	28
SAMPLE_1056	1016	1094	36
SAMPLE_10560	573	699	28
SAMPLE_10561	583	726	28
SAMPLE_10562	556	670	22
SAMPLE_10563	555	714	38
SAMPLE_10564	559	767	49
SAMPLE_10565	713	891	40
SAMPLE_10566	511	671	25
SAMPLE_10567	559	697	23
SAMPLE_10568	559	644	21
SAMPLE_10569	524	714	24
SAMPLE_1057	500	677	28
SAMPLE_10570	563	753	25
SAMPLE_10571	553	711	21
SAMPLE_10572	516	668	26
SAMPLE_10573	523	678	20
SAMPLE_10574	575	738	19
SAMPLE_10575	496	666	26
SAMPLE_10576	508	695	31
SAMPLE_10577	512	621	29
SAMPLE_10578	501	642	29
SAMPLE_10579	561	619	20
SAMPLE_1058	476	688	20
SAMPLE_10580	551	649	11
SAMPLE_10581	574	655	27
SAMPLE_10582	559	636	23
SAMPLE_10583	525	662	30
SAMPLE_10584	610	707	27
SAMPLE_10585	523	641	23
SAMPLE_10586	499	603	20
SAMPLE_10587	488	687	18
SAMPLE_10588	572	710	27
SAMPLE_10589	593	711	33
SAMPLE_1059	570	665	26
SAMPLE_10590	549	722	24
SAMPLE_10591	559	694	22
SAMPLE_10592	567	657	32
SAMPLE_10593	558	706	17
SAMPLE_10594	536	793	29
SAMPLE_10595	539	754	24
SAMPLE_10596	563	769	24
SAMPLE_10597	536	665	28
SAMPLE_10598	585	715	30
SAMPLE_10599	505	667	22
SAMPLE_106	531	750	27
SAMPLE_1060	537	690	23
SAMPLE_10600	585	739	42
SAMPLE_10601	583	699	33
SAMPLE_10602	600	750	29
SAMPLE_10603	568	663	30
SAMPLE_10604	564	695	40
SAMPLE_10605	572	635	21
SAMPLE_10606	567	765	23
SAMPLE_10607	554	730	28
SAMPLE_10608	531	705	22
SAMPLE_10609	552	669	33
SAMPLE_1061	521	661	23
SAMPLE_10610	527	702	25
SAMPLE_10611	541	700	24
SAMPLE_10612	520	692	35
SAMPLE_10613	475	636	27
SAMPLE_10614	540	686	25
SAMPLE_10615	505	690	26
SAMPLE_10616	529	740	44
SAMPLE_10617	555	764	21
SAMPLE_10618	525	671	25
SAMPLE_10619	593	700	22
SAMPLE_1062	549	732	28
SAMPLE_10620	576	686	23
SAMPLE_10621	538	731	33
SAMPLE_10622	582	737	26
SAMPLE_10623	552	704	37
SAMPLE_10624	546	729	23
SAMPLE_10625	511	726	29
SAMPLE_10626	616	710	30
SAMPLE_10627	587	656	27
SAMPLE_10628	574	668	28
SAMPLE_10629	550	655	30
SAMPLE_1063	499	644	23
SAMPLE_10630	500	611	28
SAMPLE_10631	541	670	25
SAMPLE_10632	455	608	27
SAMPLE_10633	565	712	33
SAMPLE_10634	621	724	33
SAMPLE_10635	577	773	24
SAMPLE_10636	761	829	33
SAMPLE_10637	592	685	27
SAMPLE_10638	822	930	39
SAMPLE_10639	549	634	26
SAMPLE_1064	500	659	32
SAMPLE_10640	523	637	26
SAMPLE_10641	604	677	29
SAMPLE_10642	525	654	29
SAMPLE_10643	555	722	35
SAMPLE_10644	568	682	24
SAMPLE_10645	835	1036	41
SAMPLE_10646	854	1006	35
SAMPLE_10647	861	1014	35
SAMPLE_10648	786	891	35
SAMPLE_10649	917	1020	42
SAMPLE_1065	487	663	24
SAMPLE_10650	640	778	23
SAMPLE_10651	596	776	30
SAMPLE_10652	611	759	25
SAMPLE_10653	550	723	25
SAMPLE_10654	1104	1111	44
SAMPLE_10655	689	883	34
SAMPLE_10656	1757	1620	46
SAMPLE_10657	533	656	25
SAMPLE_10658	585	707	27
SAMPLE_10659	520	697	28
SAMPLE_1066	572	747	22
SAMPLE_10660	584	780	34
SAMPLE_10661	563	738	30
SAMPLE_10662	490	654	24
SAMPLE_10663	510	653	25
SAMPLE_10664	523	621	28
SAMPLE_10665	535	674	31
SAMPLE_10666	554	763	30
SAMPLE_10667	608	737	26
SAMPLE_10668	591	763	35
SAMPLE_10669	552	695	21
SAMPLE_1067	570	735	24
SAMPLE_10670	536	712	34
SAMPLE_10671	574	690	23
SAMPLE_10672	505	690	23
SAMPLE_10673	538	673	29
SAMPLE_10674	537	699	27
SAMPLE_10675	579	692	24
SAMPLE_10676	571	678	30
SAMPLE_10677	542	702	22
SAMPLE_10678	584	706	24
SAMPLE_10679	519	657	28
SAMPLE_1068	600	732	31
SAMPLE_10680	604	724	22
SAMPLE_10681	542	684	20
SAMPLE_10682	567	650	19
SAMPLE_10683	512	709	21
SAMPLE_10684	3560	3279	84
SAMPLE_10685	3512	3157	89
SAMPLE_10686	3693	3307	85
SAMPLE_10687	743	895	29
SAMPLE_10688	518	761	24
SAMPLE_10689	835	1022	36
SAMPLE_1069	587	717	20
SAMPLE_10690	541	703	20
SAMPLE_10691	551	669	20
SAMPLE_10692	507	665	24
SAMPLE_10693	482	710	30
SAMPLE_10694	532	682	30
SAMPLE_10695	504	676	20
SAMPLE_10696	533	739	26
SAMPLE_10697	496	704	21
SAMPLE_10698	561	727	26
SAMPLE_10699	541	691	26
SAMPLE_107	539	722	27
SAMPLE_1070	587	729	26
SAMPLE_10700	558	739	24
SAMPLE_10701	512	645	28
SAMPLE_10702	967	1061	39
SAMPLE_10703	643	788	35
SAMPLE_10704	1242	1334	33
SAMPLE_10705	548	739	33
SAMPLE_10706	549	734	23
SAMPLE_10707	537	711	28
SAMPLE_10708	595	697	24
SAMPLE_10709	600	683	24
SAMPLE_1071	590	739	24
SAMPLE_10710	564	709	26
SAMPLE_10711	570	680	33
SAMPLE_10712	590	647	35
SAMPLE_10713	580	751	24
SAMPLE_10714	556	686	18
SAMPLE_10715	501	689	19
SAMPLE_10716	565	754	21
SAMPLE_10717	590	769	35
SAMPLE_10718	579	689	33
SAMPLE_10719	568	739	30
SAMPLE_1072	822	805	40
SAMPLE_10720	528	684	32
SAMPLE_10721	557	729	29
SAMPLE_10722	557	711	29
SAMPLE_10723	897	1056	32
SAMPLE_10724	869	1049	42
SAMPLE_10725	894	1001	43
SAMPLE_10726	1536	1507	48
SAMPLE_10727	1535	1599	43
SAMPLE_10728	1620	1541	46
SAMPLE_10729	525	708	31
SAMPLE_1073	780	825	34
SAMPLE_10730	533	720	23
SAMPLE_10731	518	708	33
SAMPLE_10732	559	730	22
SAMPLE_10733	524	730	21
SAMPLE_10734	550	708	32
SAMPLE_10735	542	691	28
SAMPLE_10736	544	697	24
SAMPLE_10737	549	677	25
SAMPLE_10738	536	660	30
SAMPLE_10739	566	706	31
SAMPLE_1074	885	986	35
SAMPLE_10740	573	679	19
SAMPLE_10741	621	761	31
SAMPLE_10742	601	818	23
SAMPLE_10743	518	609	22
SAMPLE_10744	592	693	23
SAMPLE_10745	590	659	21
SAMPLE_10746	585	750	32
SAMPLE_10747	581	717	23
SAMPLE_10748	590	723	25
SAMPLE_10749	563	658	19
SAMPLE_1075	572	746	30
SAMPLE_10750	613	765	24
SAMPLE_10751	538	685	23
SAMPLE_10752	602	743	27
SAMPLE_10753	575	690	33
SAMPLE_10754	516	604	21
SAMPLE_10755	534	703	27
SAMPLE_10756	545	674	20
SAMPLE_10757	488	667	27
SAMPLE_10758	521	647	26
SAMPLE_10759	960	989	44
SAMPLE_1076	546	672	21
SAMPLE_10760	520	671	26
SAMPLE_10761	1777	1658	49
SAMPLE_10762	583	722	28
SAMPLE_10763	543	657	27
SAMPLE_10764	596	731	28
SAMPLE_10765	580	747	23
SAMPLE_10766	596	764	20
SAMPLE_10767	600	744	24
SAMPLE_10768	676	843	27
SAMPLE_10769	682	853	29
SAMPLE_1077	578	729	26
SAMPLE_10770	762	913	22
SAMPLE_10771	568	678	21
SAMPLE_10772	550	659	26
SAMPLE_10773	584	715	25
SAMPLE_10774	759	868	36
SAMPLE_10775	702	848	32
SAMPLE_10776	756	851	36
SAMPLE_10777	591	688	25
SAMPLE_10778	573	663	28
SAMPLE_10779	612	712	24
SAMPLE_1078	684	854	31
SAMPLE_10780	607	719	32
SAMPLE_10781	684	779	40
SAMPLE_10782	545	664	23
SAMPLE_10783	575	715	20
SAMPLE_10784	583	720	21
SAMPLE_10785	597	730	17
SAMPLE_10786	594	728	20
SAMPLE_10787	513	644	25
SAMPLE_10788	525	706	22
SAMPLE_10789	577	743	32
SAMPLE_1079	690	835	36
SAMPLE_10790	580	703	25
SAMPLE_10791	531	595	27
SAMPLE_10792	539	722	33
SAMPLE_10793	556	714	30
SAMPLE_10794	518	630	19
SAMPLE_10795	549	667	22
SAMPLE_10796	551	684	20
SAMPLE_10797	546	682	26
SAMPLE_10798	554	756	21
SAMPLE_10799	516	702	33
SAMPLE_108	591	770	24
SAMPLE_1080	653	821	25
SAMPLE_10800	605	804	25
SAMPLE_10801	601	734	28
SAMPLE_10802	546	659	21
SAMPLE_10803	609	780	27
SAMPLE_10804	523	697	37
SAMPLE_10805	497	665	32
SAMPLE_10806	574	688	24
SAMPLE_10807	548	658	20
SAMPLE_10808	610	747	34
SAMPLE_10809	557	672	19
SAMPLE_1081	488	607	20
SAMPLE_10810	544	651	30
SAMPLE_10811	569	611	30
SAMPLE_10812	564	734	26
SAMPLE_10813	766	828	42
SAMPLE_10814	735	847	34
SAMPLE_10815	792	858	45
SAMPLE_10816	673	812	17
SAMPLE_10817	711	879	35
SAMPLE_10818	561	707	19
SAMPLE_10819	506	660	16
SAMPLE_1082	489	646	30
SAMPLE_10820	516	633	21
SAMPLE_10821	551	690	12
SAMPLE_10822	529	636	21
SAMPLE_10823	502	633	19
SAMPLE_10824	562	678	17
SAMPLE_10825	550	687	30
SAMPLE_10826	511	641	26
SAMPLE_10827	499	616	29
SAMPLE_10828	601	654	24
SAMPLE_10829	609	709	23
SAMPLE_1083	530	634	17
SAMPLE_10830	553	636	27
SAMPLE_10831	1117	1168	45
SAMPLE_10832	1061	1140	46
SAMPLE_10833	1173	1173	37
SAMPLE_10834	550	735	22
SAMPLE_10835	534	749	20
SAMPLE_10836	549	726	21
SAMPLE_10837	568	752	33
SAMPLE_10838	560	709	26
SAMPLE_10839	544	646	20
SAMPLE_1084	803	921	38
SAMPLE_10840	519	706	19
SAMPLE_10841	543	720	20
SAMPLE_10842	538	691	26
SAMPLE_10843	553	663	27
SAMPLE_10844	576	677	26
SAMPLE_10845	550	673	29
SAMPLE_10846	526	712	25
SAMPLE_10847	521	699	30
SAMPLE_10848	563	737	28
SAMPLE_10849	561	705	31
SAMPLE_1085	768	866	33
SAMPLE_10850	539	688	24
SAMPLE_10851	562	690	32
SAMPLE_10852	516	636	23
SAMPLE_10853	551	651	21
SAMPLE_10854	560	702	29
SAMPLE_10855	525	653	17
SAMPLE_10856	525	664	22
SAMPLE_10857	581	702	25
SAMPLE_10858	2160	1976	68
SAMPLE_10859	3202	2888	97
SAMPLE_1086	765	844	48
SAMPLE_10860	1200	1255	36
SAMPLE_10861	540	701	30
SAMPLE_10862	538	670	34
SAMPLE_10863	606	772	29
SAMPLE_10864	581	713	31
SAMPLE_10865	565	681	31
SAMPLE_10866	494	589	27
SAMPLE_10867	827	927	34
SAMPLE_10868	840	979	29
SAMPLE_10869	853	1007	43
SAMPLE_1087	558	678	20
SAMPLE_10870	517	678	25
SAMPLE_10871	533	704	30
SAMPLE_10872	506	660	23
SAMPLE_10873	834	1010	25
SAMPLE_10874	832	955	33
SAMPLE_10875	894	1072	28
SAMPLE_10876	545	688	27
SAMPLE_10877	531	739	23
SAMPLE_10878	581	689	16
SAMPLE_10879	603	706	21
SAMPLE_1088	538	705	23
SAMPLE_10880	548	645	24
SAMPLE_10881	545	656	27
SAMPLE_10882	802	907	26
SAMPLE_10883	811	952	25
SAMPLE_10884	830	957	27
SAMPLE_10885	536	640	27
SAMPLE_10886	573	639	21
SAMPLE_10887	497	636	24
SAMPLE_10888	597	767	34
SAMPLE_10889	562	727	24
SAMPLE_1089	560	710	23
SAMPLE_10890	631	736	29
SAMPLE_10891	567	755	25
SAMPLE_10892	543	676	25
SAMPLE_10893	1312	1540	62
SAMPLE_10894	537	709	26
SAMPLE_10895	581	743	30
SAMPLE_10896	575	746	22
SAMPLE_10897	620	749	28
SAMPLE_10898	690	859	25
SAMPLE_10899	534	656	29
SAMPLE_109	572	713	23
SAMPLE_1090	535	700	24
SAMPLE_10900	550	645	18
SAMPLE_10901	531	650	27
SAMPLE_10902	509	637	19
SAMPLE_10903	664	775	22
SAMPLE_10904	719	853	34
SAMPLE_10905	771	880	42
SAMPLE_10906	510	693	36
SAMPLE_10907	525	646	28
SAMPLE_10908	534	673	31
SAMPLE_10909	539	681	17
SAMPLE_1091	541	696	28
SAMPLE_10910	571	669	22
SAMPLE_10911	546	671	25
SAMPLE_10912	544	689	24
SAMPLE_10913	537	705	26
SAMPLE_10914	553	655	23
SAMPLE_10915	523	620	21
SAMPLE_10916	513	707	28
SAMPLE_10917	586	682	31
SAMPLE_10918	663	751	22
SAMPLE_10919	649	806	28
SAMPLE_1092	514	660	31
SAMPLE_10920	581	690	24
SAMPLE_10921	558	712	22
SAMPLE_10922	536	666	21
SAMPLE_10923	556	703	26
SAMPLE_10924	590	701	37
SAMPLE_10925	567	723	28
SAMPLE_10926	566	657	34
SAMPLE_10927	547	625	34
SAMPLE_10928	533	636	36
SAMPLE_10929	542	601	34
SAMPLE_1093	579	673	25
SAMPLE_10930	546	692	31
SAMPLE_10931	520	653	26
SAMPLE_10932	574	715	29
SAMPLE_10933	585	691	22
SAMPLE_10934	621	715	29
SAMPLE_10935	567	681	15
SAMPLE_10936	497	593	16
SAMPLE_10937	497	612	19
SAMPLE_10938	479	660	21
SAMPLE_10939	1117	1202	40
SAMPLE_1094	555	679	21
SAMPLE_10940	552	681	28
SAMPLE_10941	1698	1708	48
SAMPLE_10942	600	715	22
SAMPLE_10943	563	675	24
SAMPLE_10944	575	709	22
SAMPLE_10945	546	647	24
SAMPLE_10946	528	660	20
SAMPLE_10947	514	688	38
SAMPLE_10948	581	715	39
SAMPLE_10949	549	693	31
SAMPLE_1095	551	701	27
SAMPLE_10950	550	671	40
SAMPLE_10951	555	743	26
SAMPLE_10952	572	720	28
SAMPLE_10953	532	712	22
SAMPLE_10954	804	916	39
SAMPLE_10955	775	887	34
SAMPLE_10956	837	970	37
SAMPLE_10957	564	645	23
SAMPLE_10958	497	634	21
SAMPLE_10959	549	669	29
SAMPLE_1096	691	843	44
SAMPLE_10960	478	691	28
SAMPLE_10961	521	677	28
SAMPLE_10962	523	634	26
SAMPLE_10963	566	695	28
SAMPLE_10964	568	671	23
SAMPLE_10965	592	750	33
SAMPLE_10966	584	751	28
SAMPLE_10967	541	724	25
SAMPLE_10968	531	687	32
SAMPLE_10969	689	824	23
SAMPLE_1097	717	818	24
SAMPLE_10970	685	796	20
SAMPLE_10971	633	824	29
SAMPLE_10972	564	717	34
SAMPLE_10973	511	636	19
SAMPLE_10974	557	703	30
SAMPLE_10975	543	778	25
SAMPLE_10976	550	699	23
SAMPLE_10977	589	748	25
SAMPLE_10978	1064	1083	39
SAMPLE_10979	1072	1171	51
SAMPLE_1098	693	860	43
SAMPLE_10980	1029	1196	37
SAMPLE_10981	569	709	13
SAMPLE_10982	525	682	18
SAMPLE_10983	581	722	18
SAMPLE_10984	546	754	34
SAMPLE_10985	525	712	30
SAMPLE_10986	546	757	27
SAMPLE_10987	537	702	31
SAMPLE_10988	545	675	26
SAMPLE_10989	614	768	27
SAMPLE_1099	537	700	30
SAMPLE_10990	506	665	22
SAMPLE_10991	500	699	21
SAMPLE_10992	507	645	22
SAMPLE_10993	586	730	29
SAMPLE_10994	572	701	32
SAMPLE_10995	564	784	27
SAMPLE_10996	553	710	26
SAMPLE_10997	567	708	28
SAMPLE_10998	578	701	23
SAMPLE_10999	577	694	25
SAMPLE_11	547	695	25
SAMPLE_110	520	691	22
SAMPLE_1100	516	604	23
SAMPLE_11000	543	701	20
SAMPLE_11001	561	651	32
SAMPLE_11002	695	828	39
SAMPLE_11003	681	832	30
SAMPLE_11004	723	770	36
SAMPLE_11005	526	714	28
SAMPLE_11006	590	768	20
SAMPLE_11007	539	722	21
SAMPLE_11008	572	717	23
SAMPLE_11009	569	729	20
SAMPLE_1101	580	714	32
SAMPLE_11010	554	676	28
SAMPLE_11011	599	759	29
SAMPLE_11012	563	677	30
SAMPLE_11013	528	636	18
SAMPLE_11014	661	779	29
SAMPLE_11015	697	777	27
SAMPLE_11016	669	811	30
SAMPLE_11017	577	741	22
SAMPLE_11018	638	795	32
SAMPLE_11019	550	716	29
SAMPLE_1102	602	767	28
SAMPLE_11020	575	697	23
SAMPLE_11021	539	693	17
SAMPLE_11022	553	649	27
SAMPLE_11023	591	705	27
SAMPLE_11024	604	731	19
SAMPLE_11025	594	713	26
SAMPLE_11026	567	705	32
SAMPLE_11027	535	671	37
SAMPLE_11028	596	679	25
SAMPLE_11029	513	622	26
SAMPLE_1103	601	798	23
SAMPLE_11030	588	664	31
SAMPLE_11031	509	633	26
SAMPLE_11032	529	731	24
SAMPLE_11033	606	726	26
SAMPLE_11034	556	727	26
SAMPLE_11035	523	659	31
SAMPLE_11036	503	683	27
SAMPLE_11037	525	655	29
SAMPLE_11038	526	656	24
SAMPLE_11039	525	676	14
SAMPLE_1104	609	729	29
SAMPLE_11040	560	690	26
SAMPLE_11041	568	665	23
SAMPLE_11042	566	704	22
SAMPLE_11043	538	686	23
SAMPLE_11044	518	544	19
SAMPLE_11045	549	692	23
SAMPLE_11046	540	628	17
SAMPLE_11047	508	637	25
SAMPLE_11048	564	706	32
SAMPLE_11049	500	645	24
SAMPLE_1105	521	692	40
SAMPLE_11050	1044	1143	28
SAMPLE_11051	1195	1204	36
SAMPLE_11052	1024	1124	36
SAMPLE_11053	619	713	21
SAMPLE_11054	598	658	21
SAMPLE_11055	590	697	25
SAMPLE_11056	607	708	24
SAMPLE_11057	601	711	30
SAMPLE_11058	574	716	31
SAMPLE_11059	591	660	36
SAMPLE_1106	530	693	27
SAMPLE_11060	582	721	25
SAMPLE_11061	563	664	27
SAMPLE_11062	596	664	20
SAMPLE_11063	548	644	16
SAMPLE_11064	625	722	22
SAMPLE_11065	505	665	26
SAMPLE_11066	567	692	24
SAMPLE_11067	507	672	28
SAMPLE_11068	440	610	31
SAMPLE_11069	558	716	30
SAMPLE_1107	539	687	35
SAMPLE_11070	547	735	31
SAMPLE_11071	598	697	28
SAMPLE_11072	542	678	20
SAMPLE_11073	538	643	27
SAMPLE_11074	515	658	16
SAMPLE_11075	534	657	16
SAMPLE_11076	534	674	27
SAMPLE_11077	628	793	23
SAMPLE_11078	601	765	19
SAMPLE_11079	682	787	24
SAMPLE_1108	473	583	14
SAMPLE_11080	2026	2180	52
SAMPLE_11081	1023	1069	30
SAMPLE_11082	1111	1169	34
SAMPLE_11083	1330	1364	38
SAMPLE_11084	1236	1229	27
SAMPLE_11085	1440	1560	45
SAMPLE_11086	556	738	34
SAMPLE_11087	580	701	33
SAMPLE_11088	553	719	26
SAMPLE_11089	738	849	38
SAMPLE_1109	537	634	20
SAMPLE_11090	841	983	52
SAMPLE_11091	560	716	17
SAMPLE_11092	564	715	32
SAMPLE_11093	549	648	28
SAMPLE_11094	537	652	25
SAMPLE_11095	527	722	27
SAMPLE_11096	530	775	32
SAMPLE_11097	557	651	26
SAMPLE_11098	562	644	20
SAMPLE_11099	557	695	27
SAMPLE_111	556	638	27
SAMPLE_1110	462	624	18
SAMPLE_11100	572	761	36
SAMPLE_11101	572	687	18
SAMPLE_11102	567	716	23
SAMPLE_11103	538	700	27
SAMPLE_11104	1678	1635	51
SAMPLE_11105	552	709	28
SAMPLE_11106	3009	2801	77
SAMPLE_11107	552	758	28
SAMPLE_11108	555	674	27
SAMPLE_11109	518	779	26
SAMPLE_1111	463	638	13
SAMPLE_11110	553	671	27
SAMPLE_11111	565	656	31
SAMPLE_11112	534	699	30
SAMPLE_11113	493	614	19
SAMPLE_11114	569	738	25
SAMPLE_11115	551	705	26
SAMPLE_11116	772	919	34
SAMPLE_11117	766	938	30
SAMPLE_11118	831	980	34
SAMPLE_11119	582	752	27
SAMPLE_1112	482	644	20
SAMPLE_11120	554	678	27
SAMPLE_11121	594	782	23
SAMPLE_11122	1685	1681	50
SAMPLE_11123	1597	1534	55
SAMPLE_11124	1625	1663	40
SAMPLE_11125	584	694	20
SAMPLE_11126	533	732	27
SAMPLE_11127	567	719	26
SAMPLE_11128	563	730	17
SAMPLE_11129	509	684	19
SAMPLE_1113	466	628	9
SAMPLE_11130	580	677	21
SAMPLE_11131	567	712	28
SAMPLE_11132	521	692	26
SAMPLE_11133	544	670	33
SAMPLE_11134	694	867	27
SAMPLE_11135	724	925	35
SAMPLE_11136	798	909	25
SAMPLE_11137	582	757	21
SAMPLE_11138	557	725	28
SAMPLE_11139	566	769	27
SAMPLE_1114	643	771	27
SAMPLE_11140	563	701	27
SAMPLE_11141	565	726	31
SAMPLE_11142	558	680	20
SAMPLE_11143	592	798	31
SAMPLE_11144	603	779	25
SAMPLE_11145	581	773	32
SAMPLE_11146	539	710	44
SAMPLE_11147	532	727	37
SAMPLE_11148	611	717	40
SAMPLE_11149	532	663	36
SAMPLE_1115	720	841	28
SAMPLE_11150	578	683	29
SAMPLE_11151	575	729	33
SAMPLE_11152	576	631	35
SAMPLE_11153	585	705	25
SAMPLE_11154	629	699	32
SAMPLE_11155	1221	1175	54
SAMPLE_11156	1163	1089	33
SAMPLE_11157	1359	1389	38
SAMPLE_11158	530	738	23
SAMPLE_11159	555	699	18
SAMPLE_1116	708	799	27
SAMPLE_11160	527	721	32
SAMPLE_11161	515	704	30
SAMPLE_11162	609	776	21
SAMPLE_11163	562	750	41
SAMPLE_11164	566	694	24
SAMPLE_11165	516	607	24
SAMPLE_11166	586	724	21
SAMPLE_11167	535	731	36
SAMPLE_11168	517	640	26
SAMPLE_11169	546	751	30
SAMPLE_1117	608	786	30
SAMPLE_11170	542	704	24
SAMPLE_11171	564	711	24
SAMPLE_11172	573	696	21
SAMPLE_11173	726	885	30
SAMPLE_11174	728	913	41
SAMPLE_11175	764	893	26
SAMPLE_11176	545	651	36
SAMPLE_11177	539	675	37
SAMPLE_11178	588	683	35
SAMPLE_11179	559	700	28
SAMPLE_1118	516	692	26
SAMPLE_11180	506	700	24
SAMPLE_11181	583	698	24
SAMPLE_11182	545	707	28
SAMPLE_11183	577	712	38
SAMPLE_11184	545	699	20
SAMPLE_11185	1009	1081	34
SAMPLE_11186	957	1083	32
SAMPLE_11187	926	1067	48
SAMPLE_11188	1758	1759	49
SAMPLE_11189	2785	2657	82
SAMPLE_1119	584	724	27
SAMPLE_11190	568	706	25
SAMPLE_11191	578	699	28
SAMPLE_11192	548	684	30
SAMPLE_11193	578	726	36
SAMPLE_11194	562	780	22
SAMPLE_11195	571	794	19
SAMPLE_11196	566	718	27
SAMPLE_11197	573	699	27
SAMPLE_11198	562	678	30
SAMPLE_11199	545	693	22
SAMPLE_112	584	750	25
SAMPLE_1120	1260	1357	41
SAMPLE_11200	512	689	21
SAMPLE_11201	540	723	24
SAMPLE_11202	560	763	28
SAMPLE_11203	559	698	36
SAMPLE_11204	586	690	36
SAMPLE_11205	588	656	32
SAMPLE_11206	566	713	23
SAMPLE_11207	599	776	25
SAMPLE_11208	572	714	23
SAMPLE_11209	590	701	19
SAMPLE_1121	1231	1242	37
SAMPLE_11210	561	654	26
SAMPLE_11211	591	726	21
SAMPLE_11212	519	596	13
SAMPLE_11213	535	626	22
SAMPLE_11214	567	656	28
SAMPLE_11215	549	734	23
SAMPLE_11216	581	753	24
SAMPLE_11217	542	687	25
SAMPLE_11218	578	768	25
SAMPLE_11219	593	734	20
SAMPLE_1122	1262	1387	52
SAMPLE_11220	541	740	23
SAMPLE_11221	575	726	29
SAMPLE_11222	584	697	21
SAMPLE_11223	588	755	29
SAMPLE_11224	559	671	30
SAMPLE_11225	579	643	23
SAMPLE_11226	587	752	27
SAMPLE_11227	573	678	34
SAMPLE_11228	546	658	30
SAMPLE_11229	604	726	32
SAMPLE_1123	703	826	28
SAMPLE_11230	613	732	31
SAMPLE_11231	546	722	28
SAMPLE_11232	659	800	39
SAMPLE_11233	613	711	21
SAMPLE_11234	581	704	28
SAMPLE_11235	619	723	20
SAMPLE_11236	572	817	27
SAMPLE_11237	574	770	29
SAMPLE_11238	547	730	20
SAMPLE_11239	595	746	29
SAMPLE_1124	727	789	26
SAMPLE_11240	584	770	30
SAMPLE_11241	591	744	23
SAMPLE_11242	573	770	24
SAMPLE_11243	579	740	20
SAMPLE_11244	575	776	29
SAMPLE_11245	742	912	27
SAMPLE_11246	702	868	31
SAMPLE_11247	741	934	37
SAMPLE_11248	574	738	27
SAMPLE_11249	560	696	13
SAMPLE_1125	556	691	30
SAMPLE_11250	569	705	24
SAMPLE_11251	582	706	27
SAMPLE_11252	591	733	31
SAMPLE_11253	536	663	21
SAMPLE_11254	573	672	29
SAMPLE_11255	500	681	30
SAMPLE_11256	613	722	22
SAMPLE_11257	541	651	25
SAMPLE_11258	583	645	28
SAMPLE_11259	549	702	22
SAMPLE_1126	544	802	26
SAMPLE_11260	539	700	23
SAMPLE_11261	568	647	24
SAMPLE_11262	528	688	28
SAMPLE_11263	580	681	26
SAMPLE_11264	566	679	21
SAMPLE_11265	621	750	24
SAMPLE_11266	506	678	30
SAMPLE_11267	525	764	28
SAMPLE_11268	563	690	28
SAMPLE_11269	572	733	22
SAMPLE_1127	565	775	19
SAMPLE_11270	562	771	27
SAMPLE_11271	576	730	17
SAMPLE_11272	555	662	21
SAMPLE_11273	557	677	23
SAMPLE_11274	541	668	22
SAMPLE_11275	2795	2548	84
SAMPLE_11276	2847	2673	83
SAMPLE_11277	2654	2403	71
SAMPLE_11278	536	666	37
SAMPLE_11279	561	694	30
SAMPLE_1128	601	774	33
SAMPLE_11280	518	726	33
SAMPLE_11281	964	1039	34
SAMPLE_11282	931	1007	29
SAMPLE_11283	1055	1068	34
SAMPLE_11284	775	851	41
SAMPLE_11285	667	837	22
SAMPLE_11286	738	830	33
SAMPLE_11287	512	667	23
SAMPLE_11288	1098	1436	50
SAMPLE_11289	596	694	16
SAMPLE_1129	671	808	22
SAMPLE_11290	1999	1901	52
SAMPLE_11291	2066	2030	67
SAMPLE_11292	2233	2118	82
SAMPLE_11293	566	697	23
SAMPLE_11294	554	701	23
SAMPLE_11295	564	622	17
SAMPLE_11296	571	727	18
SAMPLE_11297	575	698	26
SAMPLE_11298	576	709	17
SAMPLE_11299	548	690	28
SAMPLE_113	527	696	21
SAMPLE_1130	615	808	19
SAMPLE_11300	529	714	27
SAMPLE_11301	593	730	35
SAMPLE_11302	584	773	27
SAMPLE_11303	534	702	29
SAMPLE_11304	581	719	24
SAMPLE_11305	594	741	38
SAMPLE_11306	544	662	29
SAMPLE_11307	583	679	29
SAMPLE_11308	582	752	27
SAMPLE_11309	522	680	26
SAMPLE_1131	734	857	25
SAMPLE_11310	612	804	22
SAMPLE_11311	576	734	29
SAMPLE_11312	540	701	22
SAMPLE_11313	555	690	20
SAMPLE_11314	896	1010	47
SAMPLE_11315	783	926	42
SAMPLE_11316	928	1018	39
SAMPLE_11317	514	667	16
SAMPLE_11318	588	717	23
SAMPLE_11319	547	682	23
SAMPLE_1132	538	671	36
SAMPLE_11320	595	763	28
SAMPLE_11321	621	729	23
SAMPLE_11322	563	740	27
SAMPLE_11323	750	909	42
SAMPLE_11324	788	912	43
SAMPLE_11325	777	899	36
SAMPLE_11326	579	692	21
SAMPLE_11327	578	703	30
SAMPLE_11328	534	640	14
SAMPLE_11329	725	946	33
SAMPLE_1133	513	687	25
SAMPLE_11330	794	955	26
SAMPLE_11331	770	977	41
SAMPLE_11332	573	760	31
SAMPLE_11333	614	735	32
SAMPLE_11334	513	663	25
SAMPLE_11335	570	708	24
SAMPLE_11336	530	687	25
SAMPLE_11337	573	695	16
SAMPLE_11338	612	728	23
SAMPLE_11339	544	652	17
SAMPLE_1134	543	657	29
SAMPLE_11340	572	715	25
SAMPLE_11341	593	703	32
SAMPLE_11342	553	681	29
SAMPLE_11343	579	687	27
SAMPLE_11344	515	718	22
SAMPLE_11345	530	711	16
SAMPLE_11346	540	697	32
SAMPLE_11347	556	699	27
SAMPLE_11348	547	695	25
SAMPLE_11349	582	719	22
SAMPLE_1135	495	620	28
SAMPLE_11350	575	683	24
SAMPLE_11351	604	739	19
SAMPLE_11352	569	700	23
SAMPLE_11353	612	713	25
SAMPLE_11354	531	687	23
SAMPLE_11355	629	735	26
SAMPLE_11356	555	725	25
SAMPLE_11357	570	707	22
SAMPLE_11358	547	717	30
SAMPLE_11359	526	720	28
SAMPLE_1136	435	596	26
SAMPLE_11360	532	718	26
SAMPLE_11361	581	761	32
SAMPLE_11362	663	750	26
SAMPLE_11363	757	819	34
SAMPLE_11364	542	666	24
SAMPLE_11365	544	636	21
SAMPLE_11366	604	712	26
SAMPLE_11367	509	628	14
SAMPLE_11368	503	723	27
SAMPLE_11369	551	753	26
SAMPLE_1137	612	684	35
SAMPLE_11370	587	737	19
SAMPLE_11371	509	718	31
SAMPLE_11372	525	719	35
SAMPLE_11373	526	720	19
SAMPLE_11374	559	674	32
SAMPLE_11375	541	642	21
SAMPLE_11376	565	717	29
SAMPLE_11377	1388	1369	49
SAMPLE_11378	556	670	27
SAMPLE_11379	1927	1826	50
SAMPLE_1138	620	779	28
SAMPLE_11380	1132	1162	34
SAMPLE_11381	1041	1092	32
SAMPLE_11382	1099	1141	39
SAMPLE_11383	533	674	30
SAMPLE_11384	545	726	30
SAMPLE_11385	561	662	29
SAMPLE_11386	561	669	22
SAMPLE_11387	561	685	26
SAMPLE_11388	606	735	18
SAMPLE_11389	514	642	20
SAMPLE_1139	541	715	23
SAMPLE_11390	500	647	21
SAMPLE_11391	559	681	20
SAMPLE_11392	538	706	21
SAMPLE_11393	518	631	28
SAMPLE_11394	579	722	20
SAMPLE_11395	558	712	23
SAMPLE_11396	589	736	24
SAMPLE_11397	554	665	24
SAMPLE_11398	793	976	30
SAMPLE_11399	851	1011	43
SAMPLE_114	549	714	24
SAMPLE_1140	622	709	18
SAMPLE_11400	817	936	33
SAMPLE_11401	565	661	22
SAMPLE_11402	563	662	27
SAMPLE_11403	576	713	16
SAMPLE_11404	577	746	37
SAMPLE_11405	574	721	29
SAMPLE_11406	580	787	40
SAMPLE_11407	608	732	29
SAMPLE_11408	561	663	30
SAMPLE_11409	536	721	26
SAMPLE_1141	517	661	17
SAMPLE_11410	561	711	26
SAMPLE_11411	572	677	27
SAMPLE_11412	573	783	20
SAMPLE_11413	598	754	23
SAMPLE_11414	544	725	18
SAMPLE_11415	571	743	30
SAMPLE_11416	811	911	22
SAMPLE_11417	814	929	30
SAMPLE_11418	753	861	24
SAMPLE_11419	1112	1182	41
SAMPLE_1142	522	699	18
SAMPLE_11420	1090	1176	54
SAMPLE_11421	1099	1192	34
SAMPLE_11422	803	923	37
SAMPLE_11423	621	736	29
SAMPLE_11424	1091	1157	39
SAMPLE_11425	570	749	21
SAMPLE_11426	555	757	25
SAMPLE_11427	1096	1444	36
SAMPLE_11428	616	779	32
SAMPLE_11429	557	721	27
SAMPLE_1143	541	661	16
SAMPLE_11430	593	710	33
SAMPLE_11431	610	725	27
SAMPLE_11432	569	687	27
SAMPLE_11433	600	723	25
SAMPLE_11434	571	734	25
SAMPLE_11435	534	709	28
SAMPLE_11436	583	738	27
SAMPLE_11437	589	742	27
SAMPLE_11438	598	666	29
SAMPLE_11439	507	731	27
SAMPLE_1144	515	681	24
SAMPLE_11440	1490	1512	46
SAMPLE_11441	1325	1347	48
SAMPLE_11442	1873	1810	50
SAMPLE_11443	559	692	27
SAMPLE_11444	532	671	26
SAMPLE_11445	547	701	21
SAMPLE_11446	557	702	27
SAMPLE_11447	559	722	36
SAMPLE_11448	541	671	19
SAMPLE_11449	545	684	28
SAMPLE_1145	1020	1424	48
SAMPLE_11450	544	684	23
SAMPLE_11451	593	729	29
SAMPLE_11452	563	679	23
SAMPLE_11453	583	716	24
SAMPLE_11454	543	638	29
SAMPLE_11455	978	1059	39
SAMPLE_11456	548	719	28
SAMPLE_11457	1447	1471	41
SAMPLE_11458	547	714	27
SAMPLE_11459	489	638	24
SAMPLE_1146	491	615	24
SAMPLE_11460	623	788	29
SAMPLE_11461	538	669	28
SAMPLE_11462	561	704	25
SAMPLE_11463	516	714	29
SAMPLE_11464	580	739	25
SAMPLE_11465	568	740	26
SAMPLE_11466	593	711	36
SAMPLE_11467	643	723	26
SAMPLE_11468	678	798	26
SAMPLE_11469	606	705	29
SAMPLE_1147	553	716	38
SAMPLE_11470	750	878	33
SAMPLE_11471	731	874	34
SAMPLE_11472	736	876	29
SAMPLE_11473	559	702	26
SAMPLE_11474	577	742	29
SAMPLE_11475	637	790	34
SAMPLE_11476	562	702	18
SAMPLE_11477	538	650	27
SAMPLE_11478	531	707	27
SAMPLE_11479	531	714	24
SAMPLE_1148	562	741	32
SAMPLE_11480	511	726	21
SAMPLE_11481	551	659	25
SAMPLE_11482	610	728	35
SAMPLE_11483	558	725	31
SAMPLE_11484	603	743	27
SAMPLE_11485	731	852	37
SAMPLE_11486	555	652	36
SAMPLE_11487	802	920	26
SAMPLE_11488	545	663	25
SAMPLE_11489	540	649	18
SAMPLE_1149	576	767	25
SAMPLE_11490	534	681	31
SAMPLE_11491	551	648	27
SAMPLE_11492	562	651	31
SAMPLE_11493	568	708	31
SAMPLE_11494	771	887	29
SAMPLE_11495	740	876	27
SAMPLE_11496	724	821	34
SAMPLE_11497	529	702	27
SAMPLE_11498	503	699	26
SAMPLE_11499	552	712	27
SAMPLE_115	533	692	33
SAMPLE_1150	570	715	26
SAMPLE_11500	572	738	32
SAMPLE_11501	584	707	27
SAMPLE_11502	545	735	24
SAMPLE_11503	568	686	29
SAMPLE_11504	594	729	35
SAMPLE_11505	571	685	30
SAMPLE_11506	1160	1199	42
SAMPLE_11507	1087	1095	38
SAMPLE_11508	1077	1142	35
SAMPLE_11509	1127	1274	55
SAMPLE_1151	549	751	24
SAMPLE_11510	1086	1222	45
SAMPLE_11511	1101	1220	43
SAMPLE_11512	539	737	32
SAMPLE_11513	511	697	25
SAMPLE_11514	617	753	27
SAMPLE_11515	936	1049	39
SAMPLE_11516	972	1088	46
SAMPLE_11517	881	1026	33
SAMPLE_11518	535	715	27
SAMPLE_11519	570	684	18
SAMPLE_1152	625	699	36
SAMPLE_11520	506	700	25
SAMPLE_11521	671	826	27
SAMPLE_11522	703	810	40
SAMPLE_11523	668	901	26
SAMPLE_11524	606	745	24
SAMPLE_11525	597	745	28
SAMPLE_11526	624	722	30
SAMPLE_11527	632	718	22
SAMPLE_11528	616	714	18
SAMPLE_11529	573	716	25
SAMPLE_1153	554	688	23
SAMPLE_11530	542	704	20
SAMPLE_11531	523	690	15
SAMPLE_11532	560	731	26
SAMPLE_11533	553	703	26
SAMPLE_11534	578	701	34
SAMPLE_11535	563	711	29
SAMPLE_11536	524	693	24
SAMPLE_11537	524	638	16
SAMPLE_11538	529	739	29
SAMPLE_11539	525	662	32
SAMPLE_1154	554	683	28
SAMPLE_11540	566	728	35
SAMPLE_11541	570	667	20
SAMPLE_11542	677	776	24
SAMPLE_11543	723	810	27
SAMPLE_11544	743	859	29
SAMPLE_11545	547	713	28
SAMPLE_11546	543	667	28
SAMPLE_11547	583	726	25
SAMPLE_11548	575	665	28
SAMPLE_11549	592	752	30
SAMPLE_1155	526	646	25
SAMPLE_11550	584	687	26
SAMPLE_11551	530	714	20
SAMPLE_11552	554	699	28
SAMPLE_11553	499	700	16
SAMPLE_11554	560	710	26
SAMPLE_11555	599	716	23
SAMPLE_11556	502	661	29
SAMPLE_11557	605	785	29
SAMPLE_11558	546	657	29
SAMPLE_11559	620	813	29
SAMPLE_1156	820	984	31
SAMPLE_11560	548	692	28
SAMPLE_11561	553	708	17
SAMPLE_11562	542	719	35
SAMPLE_11563	565	767	28
SAMPLE_11564	558	740	18
SAMPLE_11565	557	709	31
SAMPLE_11566	588	688	26
SAMPLE_11567	591	699	20
SAMPLE_11568	568	670	26
SAMPLE_11569	624	732	27
SAMPLE_1157	856	939	30
SAMPLE_11570	594	716	21
SAMPLE_11571	562	649	26
SAMPLE_11572	554	701	34
SAMPLE_11573	545	689	27
SAMPLE_11574	525	643	35
SAMPLE_11575	538	728	23
SAMPLE_11576	561	704	22
SAMPLE_11577	607	780	27
SAMPLE_11578	611	755	24
SAMPLE_11579	571	739	18
SAMPLE_1158	835	1049	38
SAMPLE_11580	618	734	29
SAMPLE_11581	616	733	34
SAMPLE_11582	597	788	32
SAMPLE_11583	561	674	26
SAMPLE_11584	559	730	30
SAMPLE_11585	531	730	39
SAMPLE_11586	560	667	33
SAMPLE_11587	567	669	34
SAMPLE_11588	531	700	27
SAMPLE_11589	571	677	29
SAMPLE_1159	782	947	34
SAMPLE_11590	623	721	34
SAMPLE_11591	526	642	29
SAMPLE_11592	754	825	35
SAMPLE_11593	566	698	22
SAMPLE_11594	561	690	20
SAMPLE_11595	591	693	23
SAMPLE_11596	594	709	34
SAMPLE_11597	542	682	26
SAMPLE_11598	597	707	28
SAMPLE_11599	756	842	25
SAMPLE_116	590	752	27
SAMPLE_1160	792	881	26
SAMPLE_11600	722	840	30
SAMPLE_11601	753	828	23
SAMPLE_11602	562	742	23
SAMPLE_11603	535	763	28
SAMPLE_11604	553	720	20
SAMPLE_11605	569	642	19
SAMPLE_11606	568	697	17
SAMPLE_11607	597	708	21
SAMPLE_11608	569	719	20
SAMPLE_11609	535	631	15
SAMPLE_1161	797	973	37
SAMPLE_11610	612	721	26
SAMPLE_11611	567	730	15
SAMPLE_11612	559	726	24
SAMPLE_11613	528	724	16
SAMPLE_11614	560	731	32
SAMPLE_11615	566	677	31
SAMPLE_11616	540	692	36
SAMPLE_11617	610	743	30
SAMPLE_11618	581	801	27
SAMPLE_11619	599	691	29
SAMPLE_1162	744	898	31
SAMPLE_11620	586	704	22
SAMPLE_11621	570	721	25
SAMPLE_11622	612	761	22
SAMPLE_11623	523	651	21
SAMPLE_11624	528	627	26
SAMPLE_11625	572	704	22
SAMPLE_11626	544	671	27
SAMPLE_11627	548	705	29
SAMPLE_11628	532	674	26
SAMPLE_11629	568	710	34
SAMPLE_1163	667	793	31
SAMPLE_11630	513	574	20
SAMPLE_11631	553	746	25
SAMPLE_11632	731	789	31
SAMPLE_11633	577	647	29
SAMPLE_11634	998	1054	39
SAMPLE_11635	832	986	31
SAMPLE_11636	876	969	30
SAMPLE_11637	795	935	32
SAMPLE_11638	552	654	23
SAMPLE_11639	531	634	23
SAMPLE_1164	798	972	31
SAMPLE_11640	513	680	25
SAMPLE_11641	518	713	20
SAMPLE_11642	496	671	23
SAMPLE_11643	545	722	22
SAMPLE_11644	481	660	33
SAMPLE_11645	521	637	31
SAMPLE_11646	538	721	31
SAMPLE_11647	655	744	34
SAMPLE_11648	636	728	42
SAMPLE_11649	657	751	25
SAMPLE_1165	784	877	28
SAMPLE_11650	1471	1506	41
SAMPLE_11651	708	832	31
SAMPLE_11652	2199	2088	55
SAMPLE_11653	566	754	23
SAMPLE_11654	513	722	25
SAMPLE_11655	609	774	29
SAMPLE_11656	525	651	21
SAMPLE_11657	548	748	34
SAMPLE_11658	559	683	31
SAMPLE_11659	611	819	33
SAMPLE_1166	862	1023	32
SAMPLE_11660	640	758	34
SAMPLE_11661	566	823	30
SAMPLE_11662	504	680	27
SAMPLE_11663	585	810	31
SAMPLE_11664	552	692	29
SAMPLE_11665	675	814	29
SAMPLE_11666	738	853	27
SAMPLE_11667	610	717	22
SAMPLE_11668	511	659	34
SAMPLE_11669	535	666	18
SAMPLE_1167	870	944	34
SAMPLE_11670	547	736	34
SAMPLE_11671	1110	1534	52
SAMPLE_11672	553	727	22
SAMPLE_11673	599	826	27
SAMPLE_11674	574	752	25
SAMPLE_11675	606	750	19
SAMPLE_11676	531	694	28
SAMPLE_11677	2194	2107	60
SAMPLE_11678	2200	2061	50
SAMPLE_11679	1941	1950	57
SAMPLE_1168	568	694	26
SAMPLE_11680	508	596	29
SAMPLE_11681	538	679	38
SAMPLE_11682	515	654	27
SAMPLE_11683	572	729	36
SAMPLE_11684	557	682	30
SAMPLE_11685	628	732	25
SAMPLE_11686	540	680	19
SAMPLE_11687	550	702	19
SAMPLE_11688	570	705	32
SAMPLE_11689	497	714	22
SAMPLE_1169	564	704	34
SAMPLE_11690	535	730	22
SAMPLE_11691	523	701	25
SAMPLE_11692	652	805	22
SAMPLE_11693	683	819	20
SAMPLE_11694	547	715	26
SAMPLE_11695	1253	1257	33
SAMPLE_11696	1200	1250	30
SAMPLE_11697	1229	1275	36
SAMPLE_11698	558	714	27
SAMPLE_11699	578	651	29
SAMPLE_117	565	627	36
SAMPLE_1170	580	722	28
SAMPLE_11700	553	756	28
SAMPLE_11701	827	949	33
SAMPLE_11702	827	978	25
SAMPLE_11703	894	1012	41
SAMPLE_11704	582	791	36
SAMPLE_11705	554	766	24
SAMPLE_11706	569	736	34
SAMPLE_11707	580	730	25
SAMPLE_11708	596	736	24
SAMPLE_11709	586	687	19
SAMPLE_1171	862	903	33
SAMPLE_11710	781	872	26
SAMPLE_11711	535	676	26
SAMPLE_11712	1034	1038	32
SAMPLE_11713	573	730	30
SAMPLE_11714	537	740	25
SAMPLE_11715	572	712	26
SAMPLE_11716	536	630	19
SAMPLE_11717	502	701	22
SAMPLE_11718	560	663	19
SAMPLE_11719	593	715	25
SAMPLE_1172	551	698	23
SAMPLE_11720	607	709	32
SAMPLE_11721	601	752	23
SAMPLE_11722	587	754	29
SAMPLE_11723	534	730	22
SAMPLE_11724	586	699	27
SAMPLE_11725	583	673	27
SAMPLE_11726	551	639	36
SAMPLE_11727	584	720	20
SAMPLE_11728	615	790	22
SAMPLE_11729	588	720	22
SAMPLE_1173	1173	1200	45
SAMPLE_11730	566	727	21
SAMPLE_11731	528	730	25
SAMPLE_11732	561	687	25
SAMPLE_11733	549	711	25
SAMPLE_11734	567	761	24
SAMPLE_11735	546	793	20
SAMPLE_11736	498	691	18
SAMPLE_11737	543	698	20
SAMPLE_11738	524	689	31
SAMPLE_11739	548	692	17
SAMPLE_1174	562	717	24
SAMPLE_11740	532	695	35
SAMPLE_11741	586	688	21
SAMPLE_11742	551	684	24
SAMPLE_11743	573	724	20
SAMPLE_11744	563	656	29
SAMPLE_11745	529	737	18
SAMPLE_11746	560	756	38
SAMPLE_11747	547	716	28
SAMPLE_11748	527	704	32
SAMPLE_11749	564	705	23
SAMPLE_1175	585	722	24
SAMPLE_11750	568	723	30
SAMPLE_11751	589	730	33
SAMPLE_11752	573	717	30
SAMPLE_11753	587	732	20
SAMPLE_11754	555	709	32
SAMPLE_11755	604	805	20
SAMPLE_11756	611	797	30
SAMPLE_11757	654	762	30
SAMPLE_11758	562	739	30
SAMPLE_11759	554	705	34
SAMPLE_1176	549	744	18
SAMPLE_11760	533	708	29
SAMPLE_11761	674	822	39
SAMPLE_11762	686	790	37
SAMPLE_11763	668	826	36
SAMPLE_11764	636	776	15
SAMPLE_11765	765	856	19
SAMPLE_11766	538	688	21
SAMPLE_11767	592	722	35
SAMPLE_11768	726	810	31
SAMPLE_11769	549	726	24
SAMPLE_1177	577	654	18
SAMPLE_11770	553	753	25
SAMPLE_11771	514	750	27
SAMPLE_11772	558	676	26
SAMPLE_11773	757	878	20
SAMPLE_11774	870	1016	31
SAMPLE_11775	678	841	27
SAMPLE_11776	544	702	35
SAMPLE_11777	557	756	35
SAMPLE_11778	577	672	20
SAMPLE_11779	551	721	26
SAMPLE_1178	530	673	30
SAMPLE_11780	544	655	24
SAMPLE_11781	589	703	26
SAMPLE_11782	512	650	19
SAMPLE_11783	550	735	25
SAMPLE_11784	613	728	19
SAMPLE_11785	561	747	32
SAMPLE_11786	557	740	24
SAMPLE_11787	532	728	30
SAMPLE_11788	565	657	32
SAMPLE_11789	585	642	21
SAMPLE_1179	553	697	15
SAMPLE_11790	474	687	35
SAMPLE_11791	517	740	29
SAMPLE_11792	564	713	29
SAMPLE_11793	519	699	36
SAMPLE_11794	570	682	36
SAMPLE_11795	558	712	26
SAMPLE_11796	545	634	32
SAMPLE_11797	616	735	20
[truncated: 39,758 more rows]
